# Supplementary material
Source: PubMed Central journal article supplement (PMC3313500)
Supplement: gmb-35-1-122-gfigsuppl1.pdf [file gmb-35-1-122-gfigsuppl1.pdf]

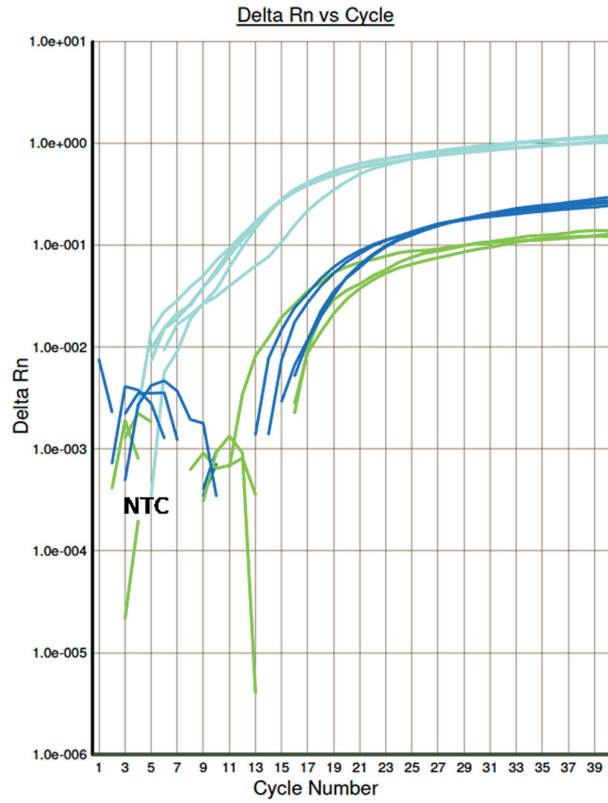

**Figure S1** - Plot showing real-time PCR amplification of multiplex assays monitored with fluorescent TaqMan<sup>®</sup> MGB probes. Delta Rn versus Cycle amplification plot of *P. guilliermondii*, *D. hansenii* and *C. palmioleophila* templates. Light blue – *P. guilliermondii*, light green – *C. palmioleophila* and dark blue – *D. hansenii*. The NTC (no template control) curves shows no detection in the absence of templates.
