# Supplementary material
Source: PubMed Central journal article supplement (PMC3313500)
Supplement: gmb-35-1-122-gfigsuppl2.pdf [file gmb-35-1-122-gfigsuppl2.pdf]

BLASTN 2.2.23+

Reference: Zheng Zhang, Scott Schwartz, Lukas Wagner, and Webb Miller (2000), "A greedy algorithm for aligning DNA sequences", J Comput Biol 2000; 7(1-2):203-14.

RID: 2DDJM8AX014

Database: All GenBank+EMBL+DDBJ+PDB sequences (but no EST, STS, GSS, environmental samples or phase 0, 1 or 2 HTGS sequences)

12,090,198 sequences; 31,882,540,517 total letters

Query= gi|171918730|gb|EU568917.1| *Candida palmioleophila* 18S ribosomal RNA gene, partial sequence; internal transcribed spacer 1, 5.8S ribosomal RNA gene, and internal transcribed spacer 2, complete sequence; and 28S ribosomal RNA gene, partial sequence

Length=632

| Sequences producing significant alignments: |                                                                |      | Score  | E     |
|---------------------------------------------|----------------------------------------------------------------|------|--------|-------|
|                                             |                                                                |      | (Bits) | Value |
| gb EU569035.1                               | <i>Candida palmioleophila</i> isolate CNRMA 200500813...       | 1168 | 0.0    |       |
| gb EU569033.1                               | <i>Candida palmioleophila</i> isolate CNRMA 200500825...       | 1168 | 0.0    |       |
| gb EU569031.1                               | <i>Candida palmioleophila</i> isolate CNRMA 200500840...       | 1168 | 0.0    |       |
| gb EU568917.1                               | <i>Candida palmioleophila</i> 18S ribosomal RNA gene,...       | 1168 | 0.0    |       |
| emb FM875849.1                              | Uncultured fungus ITS1, 5.8S rRNA gene and IT...               | 1157 | 0.0    |       |
| gb EU604759.1                               | <i>Candida</i> sp. C22 internal transcribed spacer 1,...       | 1086 | 0.0    |       |
| gb FJ609219.1                               | <i>Candida palmioleophila</i> strain IHEM 22283 18S r...       | 1018 | 0.0    |       |
| emb FN868154.1                              | <i>Candida</i> sp. CBS 11774 genomic DNA containing ...        | 1000 | 0.0    |       |
| dbj AB016583.1                              | <i>Candida palmioleophila</i> 5.8S rRNA gene, strain...        | 966  | 0.0    |       |
| dbj AB016582.1                              | <i>Candida palmioleophila</i> 5.8S rRNA gene, strain...        | 966  | 0.0    |       |
| gb FJ873416.1                               | <i>Candida</i> sp. GA1S01 internal transcribed spacer...       | 946  | 0.0    |       |
| gb DQ409166.1                               | <i>Pichia segobiensis</i> strain CECT 10210 18S ribos...       | 904  | 0.0    |       |
| emb AJ606464.1                              | <i>Candida shehatae</i> var. <i>shehatae</i> 18S rRNA gene ... | 904  | 0.0    |       |
| dbj AB513338.1                              | <i>Pichia</i> sp. MT-LUC0016 genes for 18S rRNA, ITS...        | 898  | 0.0    |       |
| dbj AB513336.1                              | <i>Pichia</i> sp. MT-LUC0012 genes for 18S rRNA, ITS...        | 898  | 0.0    |       |
| dbj AB513335.1                              | <i>Pichia</i> sp. MT-LUC0009 genes for 18S rRNA, ITS...        | 898  | 0.0    |       |
| dbj AB513334.1                              | <i>Pichia</i> sp. MT-LUC0008 genes for 18S rRNA, ITS...        | 898  | 0.0    |       |
| dbj AB513333.1                              | <i>Pichia</i> sp. MT-LUC0007 genes for 18S rRNA, ITS...        | 898  | 0.0    |       |
| gb CP000497.1                               | <i>Pichia stipitis</i> CBS 6054 chromosome 3, complet...       | 898  | 0.0    |       |
| gb DQ409167.1                               | <i>Pichia stipitis</i> strain CECT 1922 18S ribosomal...       | 898  | 0.0    |       |
| dbj AB513332.1                              | <i>Pichia</i> sp. MT-LUC0006 genes for 18S rRNA, ITS...        | 893  | 0.0    |       |
| gb AY227905.1                               | <i>Candida</i> sp. BG02-4-1-3-1 18S ribosomal RNA gen...       | 863  | 0.0    |       |
| gb AY227904.1                               | <i>Candida</i> sp. BG02-2-11-6-5 18S ribosomal RNA ge...       | 863  | 0.0    |       |
| gb AY227903.1                               | <i>Candida</i> sp. BG02-7-16-1 18S ribosomal RNA gene...       | 863  | 0.0    |       |
| gb AY227902.1                               | <i>Pichia</i> sp. KS-42-W2 18S ribosomal RNA gene, pa...       | 863  | 0.0    |       |
| gb AY227901.1                               | <i>Candida</i> sp. BG01-5-4-2-1 18S ribosomal RNA gen...       | 863  | 0.0    |       |
| gb AY227900.1                               | <i>Candida</i> sp. GA012-1-1 18S ribosomal RNA gene, ...       | 863  | 0.0    |       |
| gb AY227907.1                               | <i>Candida</i> sp. BG02-7-14-003-2-1 18S ribosomal RN...       | 857  | 0.0    |       |
| gb AY227906.1                               | <i>Candida</i> sp. BG02-7-14-003-1-1 18S ribosomal RN...       | 857  | 0.0    |       |
| gb GU256745.1                               | <i>Pichia stipitis</i> strain ATCC 62970 18S ribosoma...       | 848  | 0.0    |       |
| emb FM178314.1                              | <i>Candida coipomoensis</i> 18S rRNA gene (partial),...        | 848  | 0.0    |       |
| gb AY325112.1                               | <i>Candida</i> sp. BG03-3-25-1-5 18S ribosomal RNA ge...       | 846  | 0.0    |       |
| gb AY325111.1                               | <i>Candida</i> sp. BG03-3-25-1-3 18S ribosomal RNA ge...       | 846  | 0.0    |       |
| emb FM178352.1                              | <i>Candida ergastensis</i> 18S rRNA gene (partial), ...        | 845  | 0.0    |       |
| dbj AB513337.1                              | <i>Candida</i> sp. MT-LUC0013 genes for 18S rRNA, IT...        | 843  | 0.0    |       |
| gb EF627975.1                               | <i>Candida lignicola</i> strain NBRC 102564 internal ...       | 841  | 0.0    |       |
| gb EU343874.1                               | <i>Candida coipomoensis</i> strain MUCL 29818 18S rib...       | 830  | 0.0    |       |
| gb EU343826.1                               | <i>Candida ergastensis</i> strain MUCL 30034 18S ribo...       | 824  | 0.0    |       |
| gb GQ458025.1                               | <i>Debaryomyces hansenii</i> strain MA09-AK 18S ribos...       | 819  | 0.0    |       |
| dbj AB220031.1                              | <i>Debaryomyces fabryi</i> genes for 18S rRNA, ITS1,...        | 819  | 0.0    |       |
| gb EU149789.1                               | <i>Debaryomyces hansenii</i> strain CBS 10686 18S rib...       | 819  | 0.0    |       |
| gb EU569041.1                               | <i>Debaryomyces hansenii</i> isolate CNRMA 200600935 ...       | 819  | 0.0    |       |

|                |                                                    |     |     |
|----------------|----------------------------------------------------|-----|-----|
| gb EU569037.1  | Debaryomyces hansenii isolate CNRMA 200500815 ...  | 819 | 0.0 |
| gb EU568915.1  | Debaryomyces hansenii 18S ribosomal RNA gene, ...  | 819 | 0.0 |
| gb EF196809.1  | Debaryomyces hansenii voucher MCCC2E00323 18S ...  | 819 | 0.0 |
| gb AF210326.1  | AF210326 Debaryomyces hansenii var. fabryi CBS7... | 819 | 0.0 |
| gb GU213439.1  | Saccharomycetes sp. HZ10 18S ribosomal RNA gen...  | 817 | 0.0 |
| emb FM178351.1 | Candida glabrosa 18S rRNA gene (partial), ITS...   | 815 | 0.0 |
| gb HM032737.1  | Debaryomyces hansenii strain NJ147 18S ribosom...  | 813 | 0.0 |
| gb GQ458041.1  | Debaryomyces hansenii strain ATCC 60978 18S ri...  | 813 | 0.0 |
| gb GQ458019.1  | Debaryomyces hansenii strain MA09-J 18S riboso...  | 813 | 0.0 |
| gb GQ376084.1  | Debaryomyces hansenii var. hansenii isolate UO...  | 813 | 0.0 |
| dbj AB220030.1 | Debaryomyces hansenii var. hansenii genes for...   | 813 | 0.0 |
| gb EU569039.1  | Debaryomyces hansenii isolate CNRMA 200600362 ...  | 813 | 0.0 |
| gb EF432798.1  | Pueraria montana var. lobata from China: Jiang...  | 813 | 0.0 |
| gb EF432797.1  | Pueraria montana var. lobata from China: Jiang...  | 813 | 0.0 |
| gb AF210327.1  | AF210327 Debaryomyces hansenii var. hansenii CB... | 813 | 0.0 |
| gb GQ913348.1  | Debaryomyces hansenii strain W4682 18S ribosom...  | 811 | 0.0 |
| dbj AB220032.1 | Candida psychrophila genes for 18S rRNA, ITS1...   | 809 | 0.0 |
| gb AY040667.1  | Candida psychrophila internal transcribed spac...  | 809 | 0.0 |
| gb FJ172253.1  | Candida sinolaborantium strain ATCC MYA-4337 1...  | 808 | 0.0 |
| gb EF198011.1  | Debaryomyces pseudopolymorphus strain WC43-3 1...  | 808 | 0.0 |
| gb EF222225.1  | Debaryomyces hansenii strain gaolhou2 18S ribo...  | 804 | 0.0 |
| gb EU149790.1  | Debaryomyces hansenii strain CBS 10629 18S rib...  | 802 | 0.0 |
| gb EF194843.1  | Debaryomyces hansenii voucher MCCC2E00222 18S ...  | 802 | 0.0 |
| gb EF197815.1  | Debaryomyces hansenii strain GAO2 18S ribosoma...  | 802 | 0.0 |
| gb EF643596.1  | Debaryomyces hansenii strain LN-5 18S ribosoma...  | 800 | 0.0 |
| gb EF643588.1  | Debaryomyces hansenii strain LN-2 18S ribosoma...  | 800 | 0.0 |
| dbj AB220029.1 | Debaryomyces nepalensis genes for 18S rRNA, I...   | 798 | 0.0 |
| dbj AB220028.1 | Debaryomyces nepalensis genes for 18S rRNA, I...   | 798 | 0.0 |
| gb EF192232.1  | Debaryomyces hansenii strain shi2wei 18S ribos...  | 798 | 0.0 |
| gb EF192224.1  | Debaryomyces hansenii 18S ribosomal RNA gene, ...  | 798 | 0.0 |
| gb EF193070.1  | Debaryomyces hansenii voucher MCCC2E00282 18S ...  | 798 | 0.0 |
| gb EF222227.1  | Debaryomyces hansenii strain gaoyandie zhongch...  | 797 | 0.0 |
| emb AJ606466.1 | Candida coipomoensis 18S rRNA gene (partial),...   | 797 | 0.0 |
| gb EU343832.1  | Candida glabrosa strain MUCL 29834 18S ribosom...  | 795 | 0.0 |
| gb EU149791.1  | Debaryomyces hansenii strain CBS 10751 18S rib...  | 791 | 0.0 |
| gb EF193068.1  | Debaryomyces hansenii voucher MCCC2E00280 18S ...  | 791 | 0.0 |
| gb DQ668354.1  | Debaryomyces hansenii isolate Sy-8 18S ribosom...  | 789 | 0.0 |
| gb AY964676.1  | Candida sinolaborantium strain BG04-2-20-1-1-C...  | 789 | 0.0 |
| gb AY964675.1  | Candida sinolaborantium strain BG04-2-20-1-1-1...  | 789 | 0.0 |
| gb AY964674.1  | Candida sinolaborantium strain CBS 9940 18S ri...  | 789 | 0.0 |
| gb AY964679.1  | Candida temnochilae strain CBS 9939 18S riboso...  | 787 | 0.0 |
| gb AY964678.1  | Candida temnochilae strain CBS 9938 18S riboso...  | 787 | 0.0 |
| gb AY964677.1  | Candida temnochilae strain BG01-7-25-009A-3-1 ...  | 787 | 0.0 |
| gb DQ317356.1  | Saccharomycetaceae sp. BC41 18S ribosomal RNA ...  | 785 | 0.0 |
| gb EF192225.1  | Debaryomyces hansenii 18S ribosomal RNA gene, ...  | 784 | 0.0 |
| gb AY845351.1  | Candida lignicola 18S ribosomal RNA gene, part...  | 784 | 0.0 |
| gb EF643593.1  | Debaryomyces hansenii strain LN-3 18S ribosoma...  | 782 | 0.0 |
| gb EF543259.1  | Debaryomyces hansenii strain hcx-1 18S ribosom...  | 782 | 0.0 |
| gb EF190234.1  | Debaryomyces hansenii strain NA-1 18S ribosoma...  | 782 | 0.0 |
| gb DQ534410.1  | Debaryomyces hansenii strain SWJ-10b 18S ribos...  | 782 | 0.0 |
| gb GQ376085.1  | Debaryomyces hansenii var. hansenii isolate UO...  | 780 | 0.0 |
| gb EF197943.1  | Debaryomyces hansenii strain HK67-4 18S riboso...  | 780 | 0.0 |
| gb EF190231.1  | Debaryomyces hansenii strain wwl-2 18S ribosom...  | 778 | 0.0 |
| gb EF192227.1  | Debaryomyces hansenii strain w-14-1 18S riboso...  | 778 | 0.0 |
| gb FJ153162.1  | Candida sp. SG6L02 18S ribosomal RNA gene, par...  | 776 | 0.0 |
| gb EF197950.1  | Debaryomyces hansenii strain HK32-1 18S riboso...  | 776 | 0.0 |
| gb EF197946.1  | Debaryomyces hansenii strain HK67-5 18S riboso...  | 776 | 0.0 |
| gb EF197944.1  | Debaryomyces hansenii strain WC56-1 18S riboso...  | 776 | 0.0 |

#### ALIGNMENTS

>gb|EU569035.1| Candida palmioleophila isolate CNRMA 200500813 18S ribosomal RNA gene, partial sequence; internal transcribed spacer 1, 5.8S ribosomal RNA gene, and internal transcribed spacer 2, complete sequence; and 28S ribosomal RNA gene, partial sequence

Length=632

Score = 1168 bits (632), Expect = 0.0  
Identities = 632/632 (100%), Gaps = 0/632 (0%)  
Strand=Plus/Plus

```
Query 1 TCCGTAGGTGAACCTGCGGAAGGATCATTACTGTATTCTAATTGCCAGCGCTTAATTGCG 60
      |||
Sbjct 1 TCCGTAGGTGAACCTGCGGAAGGATCATTACTGTATTCTAATTGCCAGCGCTTAATTGCG 60

Query 61 CGGCGATTAAACCTTACACACAATGTTTTCTTTATTAGAAACTATTGCTTTGGCTTGGC 120
      |||
Sbjct 61 CGGCGATTAAACCTTACACACAATGTTTTCTTTATTAGAAACTATTGCTTTGGCTTGGC 120

Query 121 TAAGAAATTAGTCGGGCCAGAGGTTTACACAACTTCAATTTTTAATTGAATTGTTATTT 180
      |||
Sbjct 121 TAAGAAATTAGTCGGGCCAGAGGTTTACACAACTTCAATTTTTAATTGAATTGTTATTT 180

Query 181 AATACTTTGTCAATTTGTTGATTAAATTCAAACAATCTTCAAACTTTCACAACCGGATC 240
      |||
Sbjct 181 AATACTTTGTCAATTTGTTGATTAAATTCAAACAATCTTCAAACTTTCACAACCGGATC 240

Query 241 TCTTGGTTCTCGCATCGATGAAGAACGCAGCGAAATGCGATAAGTAATATGAATTGCAGA 300
      |||
Sbjct 241 TCTTGGTTCTCGCATCGATGAAGAACGCAGCGAAATGCGATAAGTAATATGAATTGCAGA 300

Query 301 TTTTCGTGAATCATCGAATCTTTGAACGCACATTGCGCCCTCTGGTATTCCAGAGGGCAT 360
      |||
Sbjct 301 TTTTCGTGAATCATCGAATCTTTGAACGCACATTGCGCCCTCTGGTATTCCAGAGGGCAT 360

Query 361 GCCTGTTTGAGCGTCATTTCTCTCTCAAACCCTTGGGTTTGGTATTGAGTGATACTCTTA 420
      |||
Sbjct 361 GCCTGTTTGAGCGTCATTTCTCTCTCAAACCCTTGGGTTTGGTATTGAGTGATACTCTTA 420

Query 421 GTCGAACTAGGCGTTTGCTTGAAATTTATTTGGCATGAGTGACGCTGAGAAGTGCATTAG 480
      |||
Sbjct 421 GTCGAACTAGGCGTTTGCTTGAAATTTATTTGGCATGAGTGACGCTGAGAAGTGCATTAG 480

Query 481 GAAATATCAATGTATTAGGTTTATCCAACCTCGTTGACAATTCTTGGTTGTGAATTTTTGG 540
      |||
Sbjct 481 GAAATATCAATGTATTAGGTTTATCCAACCTCGTTGACAATTCTTGGTTGTGAATTTTTGG 540

Query 541 TGTTAGGCTTTGCCTTAAAAACAACAACAAGTTTGACCTCAAATCAGGTAGGATTACC 600
      |||
Sbjct 541 TGTTAGGCTTTGCCTTAAAAACAACAACAAGTTTGACCTCAAATCAGGTAGGATTACC 600

Query 601 CGCTGAACTTAAGCATATCAATAAGCGGAGGA 632
      |||
Sbjct 601 CGCTGAACTTAAGCATATCAATAAGCGGAGGA 632
```

>gb|EU569033.1| *Candida palmiophila* isolate CNRMA 200500825 18S ribosomal RNA gene, partial sequence; internal transcribed spacer 1, 5.8S ribosomal RNA gene, and internal transcribed spacer 2, complete sequence; and 28S ribosomal RNA gene, partial sequence  
Length=632

Score = 1168 bits (632), Expect = 0.0  
Identities = 632/632 (100%), Gaps = 0/632 (0%)  
Strand=Plus/Plus

```
Query 1 TCCGTAGGTGAACCTGCGGAAGGATCATTACTGTATTCTAATTGCCAGCGCTTAATTGCG 60
      |||
Sbjct 1 TCCGTAGGTGAACCTGCGGAAGGATCATTACTGTATTCTAATTGCCAGCGCTTAATTGCG 60
```

```

Query 61 CGGCGATTAAACCTTACACACAATGTTTTCTTTATTAGAACTATTGCTTTGGCTTGGC 120
      |||
Sbjct 61 CGGCGATTAAACCTTACACACAATGTTTTCTTTATTAGAACTATTGCTTTGGCTTGGC 120

Query 121 TAAGAAATTAGTCGGGCCAGAGGTTTACACAACTTCAATTTTTAATTGAATTGTTATTT 180
      |||
Sbjct 121 TAAGAAATTAGTCGGGCCAGAGGTTTACACAACTTCAATTTTTAATTGAATTGTTATTT 180

Query 181 AATACTTTGTCAATTTGTTGATTAAATTCAAACAATCTTCAAACTTTCAACAACGGATC 240
      |||
Sbjct 181 AATACTTTGTCAATTTGTTGATTAAATTCAAACAATCTTCAAACTTTCAACAACGGATC 240

Query 241 TCTTGGTTCTCGCATCGATGAAGAACGCAGCGAAATGCGATAAGTAATATGAATTGCAGA 300
      |||
Sbjct 241 TCTTGGTTCTCGCATCGATGAAGAACGCAGCGAAATGCGATAAGTAATATGAATTGCAGA 300

Query 301 TTTTCGTGAATCATCGAATCTTTGAACGCACATTGCGCCCTCTGGTATTCCAGAGGGCAT 360
      |||
Sbjct 301 TTTTCGTGAATCATCGAATCTTTGAACGCACATTGCGCCCTCTGGTATTCCAGAGGGCAT 360

Query 361 GCCTGTTTGAGCGTCATTTCTCTCTCAAACCCTTGGGTTTGGTATTGAGTGATACTCTTA 420
      |||
Sbjct 361 GCCTGTTTGAGCGTCATTTCTCTCTCAAACCCTTGGGTTTGGTATTGAGTGATACTCTTA 420

Query 421 GTCGAACTAGGCGTTTGCTTGAAATTTATTGGCATGAGTGACGCTGAGAAGTGCATTAG 480
      |||
Sbjct 421 GTCGAACTAGGCGTTTGCTTGAAATTTATTGGCATGAGTGACGCTGAGAAGTGCATTAG 480

Query 481 GAAATATCAATGTATTAGGTTTATCCAACCTCGTTGACAATTCTTGGTTGTGAATTTTTGG 540
      |||
Sbjct 481 GAAATATCAATGTATTAGGTTTATCCAACCTCGTTGACAATTCTTGGTTGTGAATTTTTGG 540

Query 541 TGTTAGGCTTTGCCTTAAAAACAACAAACAAGTTTGACCTCAAATCAGGTAGGATTACC 600
      |||
Sbjct 541 TGTTAGGCTTTGCCTTAAAAACAACAAACAAGTTTGACCTCAAATCAGGTAGGATTACC 600

Query 601 CGCTGAACTTAAGCATATCAATAAGCGGAGGA 632
      |||
Sbjct 601 CGCTGAACTTAAGCATATCAATAAGCGGAGGA 632

```

>gb|EU569031.1| *Candida palmiophila* isolate CNRMA 200500840 18S ribosomal RNA gene, partial sequence; internal transcribed spacer 1, 5.8S ribosomal RNA gene, and internal transcribed spacer 2, complete sequence; and 28S ribosomal RNA gene, partial sequence  
Length=632

Score = 1168 bits (632), Expect = 0.0  
Identities = 632/632 (100%), Gaps = 0/632 (0%)  
Strand=Plus/Plus

```

Query 1 TCCGTAGGTGAACCTGCGGAAGGATCATTACTGTATTCTAATTGCCAGCGCTTAATTGCG 60
      |||
Sbjct 1 TCCGTAGGTGAACCTGCGGAAGGATCATTACTGTATTCTAATTGCCAGCGCTTAATTGCG 60

Query 61 CGGCGATTAAACCTTACACACAATGTTTTCTTTATTAGAACTATTGCTTTGGCTTGGC 120
      |||
Sbjct 61 CGGCGATTAAACCTTACACACAATGTTTTCTTTATTAGAACTATTGCTTTGGCTTGGC 120

Query 121 TAAGAAATTAGTCGGGCCAGAGGTTTACACAACTTCAATTTTTAATTGAATTGTTATTT 180
      |||
Sbjct 121 TAAGAAATTAGTCGGGCCAGAGGTTTACACAACTTCAATTTTTAATTGAATTGTTATTT 180

```

```

Query 181 AATACTTTGTCAATTTGTTGATTAAATTCAAACAATCTTCAAACCTTTCAACAACGGATC 240
          |||
Sbjct 181 AATACTTTGTCAATTTGTTGATTAAATTCAAACAATCTTCAAACCTTTCAACAACGGATC 240

Query 241 TCTTGGTTCTCGCATCGATGAAGAACGCAGCGAAATGCGATAAGTAATATGAATTGCAGA 300
          |||
Sbjct 241 TCTTGGTTCTCGCATCGATGAAGAACGCAGCGAAATGCGATAAGTAATATGAATTGCAGA 300

Query 301 TTTTCGTGAATCATCGAATCTTTGAACGCACATTGCGCCCTCTGGTATTCCAGAGGGCAT 360
          |||
Sbjct 301 TTTTCGTGAATCATCGAATCTTTGAACGCACATTGCGCCCTCTGGTATTCCAGAGGGCAT 360

Query 361 GCCTGTTTGAGCGTCATTTCTCTCTCAAACCTTGGGTTTGGTATTGAGTGATACTCTTA 420
          |||
Sbjct 361 GCCTGTTTGAGCGTCATTTCTCTCTCAAACCTTGGGTTTGGTATTGAGTGATACTCTTA 420

Query 421 GTCGAAGTAGGCGTTTGCTTGAAATTTATTGGCATGAGTGACGCTGAGAAGTGCATTGAG 480
          |||
Sbjct 421 GTCGAAGTAGGCGTTTGCTTGAAATTTATTGGCATGAGTGACGCTGAGAAGTGCATTGAG 480

Query 481 GAAATATCAATGTATTAGGTTTATCCAACCTCGTTGACAATTCTTGGTTGTGAATTTTGG 540
          |||
Sbjct 481 GAAATATCAATGTATTAGGTTTATCCAACCTCGTTGACAATTCTTGGTTGTGAATTTTGG 540

Query 541 TGTTAGGCTTTGCCTTAAAAACAACAACAAGTTTGACCTCAAATCAGGTAGGATTACC 600
          |||
Sbjct 541 TGTTAGGCTTTGCCTTAAAAACAACAACAAGTTTGACCTCAAATCAGGTAGGATTACC 600

Query 601 CGCTGAACTTAAGCATATCAATAAGCGGAGGA 632
          |||
Sbjct 601 CGCTGAACTTAAGCATATCAATAAGCGGAGGA 632

```

>gb|EU568917.1| *Candida palmioleophila* 18S ribosomal RNA gene, partial sequence; internal transcribed spacer 1, 5.8S ribosomal RNA gene, and internal transcribed spacer 2, complete sequence; and 28S ribosomal RNA gene, partial sequence  
Length=632

Score = 1168 bits (632), Expect = 0.0  
Identities = 632/632 (100%), Gaps = 0/632 (0%)  
Strand=Plus/Plus

```

Query 1 TCCGTAGGTGAACCTGCGGAAGGATCATTACTGTATTCTAATTGCCAGCGCTTAATTGCG 60
          |||
Sbjct 1 TCCGTAGGTGAACCTGCGGAAGGATCATTACTGTATTCTAATTGCCAGCGCTTAATTGCG 60

Query 61 CGGCGATTAAACCTTACACACAATGTTTTCTTTATTAGAACTATTGCTTTGGCTTGGC 120
          |||
Sbjct 61 CGGCGATTAAACCTTACACACAATGTTTTCTTTATTAGAACTATTGCTTTGGCTTGGC 120

Query 121 TAAGAAATTAGTCGGGCCAGAGGTTTACACAACTTCAATTTTAAATTGAATTGTTATTT 180
          |||
Sbjct 121 TAAGAAATTAGTCGGGCCAGAGGTTTACACAACTTCAATTTTAAATTGAATTGTTATTT 180

Query 181 AATACTTTGTCAATTTGTTGATTAAATTCAAACAATCTTCAAACCTTTCAACAACGGATC 240
          |||
Sbjct 181 AATACTTTGTCAATTTGTTGATTAAATTCAAACAATCTTCAAACCTTTCAACAACGGATC 240

Query 241 TCTTGGTTCTCGCATCGATGAAGAACGCAGCGAAATGCGATAAGTAATATGAATTGCAGA 300
          |||
Sbjct 241 TCTTGGTTCTCGCATCGATGAAGAACGCAGCGAAATGCGATAAGTAATATGAATTGCAGA 300

Query 301 TTTTCGTGAATCATCGAATCTTTGAACGCACATTGCGCCCTCTGGTATTCCAGAGGGCAT 360

```

```

Sbjct 301 |||...||| TTTTCGTGAATCATCGAATCTTTGAACGCACATTGCGCCCTCTGGTATTCCAGAGGGCAT 360
Query 361 GCCTGTTTGAGCGTCATTTCTCTCTCAAACCCCTGGGTTTGGTATTGAGTGATACTCTTA 420
Sbjct 361 |||...||| GCCTGTTTGAGCGTCATTTCTCTCTCAAACCCCTGGGTTTGGTATTGAGTGATACTCTTA 420
Query 421 GTCGAACTAGGCGTTTGCTTGAAATTTATTGGCATGAGTGACGCTGAGAAGTGCATTTCAG 480
Sbjct 421 |||...||| GTCGAACTAGGCGTTTGCTTGAAATTTATTGGCATGAGTGACGCTGAGAAGTGCATTTCAG 480
Query 481 GAAATATCAATGTATTAGGTTTATCCAACCTCGTTGACAATTCTTGGTTGTGAATTTTGG 540
Sbjct 481 |||...||| GAAATATCAATGTATTAGGTTTATCCAACCTCGTTGACAATTCTTGGTTGTGAATTTTGG 540
Query 541 TGTTAGGCTTTGCCTTAAAAACAACAACAAGTTTGACCTCAAATCAGGTAGGATTACC 600
Sbjct 541 |||...||| TGTTAGGCTTTGCCTTAAAAACAACAACAAGTTTGACCTCAAATCAGGTAGGATTACC 600
Query 601 CGCTGAACTTAAGCATATCAATAAGCGGAGGA 632
Sbjct 601 |||...||| CGCTGAACTTAAGCATATCAATAAGCGGAGGA 632

```

>emb|FM875849.1| Uncultured fungus ITS1, 5.8S rRNA gene and ITS2 region, clone f11  
Length=670

Score = 1157 bits (626), Expect = 0.0  
Identities = 630/632 (99%), Gaps = 0/632 (0%)  
Strand=Plus/Minus

```

Query 1 TCCGTAGGTGAACCTGCGGAAGGATCATTACTGTATTCTAATTGCCAGCGCTTAATTGCG 60
Sbjct 632 |||...||| TCCGTAGGTGAACCTGCGGAAGGATCATTACTGTATTCTAATTGCCAGCGCTTAATTGCG 573
Query 61 CGGCGATTAAACCTTACACACAATGTTTTCTTTATTAGAACTATTGCTTTGGCTTGGC 120
Sbjct 572 |||...||| CGGCGATTAAACCTTACACACAATGTTTTCTTTATTAGAACTATTGCTTTGGCTTGGC 513
Query 121 TAAGAAATTAGTCGGGCCAGAGGTTTACACAACTTCAATTTTAAATTGAATTGTTATTT 180
Sbjct 512 |||...||| TAAGAAATTAGTCGGGCCAGAGGTTTACACAACTTCAATTTTAAATTGAATTGTTATTT 453
Query 181 AATACTTTGTCAATTTGTTGATTAAATTCAAACAATCTTCAAACTTTCAACAACGGATC 240
Sbjct 452 |||...||| AATACTTTGTCAATTTGTTGATTAAATTCAAACAATCTTCAAACTTTCAACAACGGATC 393
Query 241 TCTTGGTTCTCGCATCGATGAAGAACGCAGCGAAATGCGATAAGTAATATGAATTGCAGA 300
Sbjct 392 |||...||| TCTTGGTTCTCGCATCGATGAAGAACGCAGCGAAATGCGATAAGTAATATGAATTGCAGA 333
Query 301 TTTTCGTGAATCATCGAATCTTTGAACGCACATTGCGCCCTCTGGTATTCCAGAGGGCAT 360
Sbjct 332 |||...||| TTTTCGTGAATCATCGAATCTTTGAACGCACATTGCGCCCTCTGGTATTCCAGAGGGCAT 273
Query 361 GCCTGTTTGAGCGTCATTTCTCTCTCAAACCCCTGGGTTTGGTATTGAGTGATACTCTTA 420
Sbjct 272 |||...||| GCCTGTTTGAGCGTCATTTCTCTCTCAAACCCCTGGGTTTGGTATTGAGTGATACTCTTA 213
Query 421 GTCGAACTAGGCGTTTGCTTGAAATTTATTGGCATGAGTGACGCTGAGAAGTGCATTTCAG 480
Sbjct 212 |||...||| GTCGAACTAGGCGTTTGCTTGAAATTTATTGGCATGAGTGATGCTGAGAAGTGCATTTCAG 153

```

```

Query 481 GAAATATCAATGTATTAGGTTTATCCAACCTCGTTGACAATTCTTGTTGTGAATTTTTGG 540
          |||
Sbjct 152 GAAATATCAATGTATTAGGTTTATCCAACCTCGTTGACAATTCTTGTTGTGAATTTTTGG 93

Query 541 TGTTAGGCTTTGCCTTAAAAACAACAAACAAGTTTGACCTCAAATCAGGTAGGATTACC 600
          |||
Sbjct 92 TGTTAGGCTTTGCCTTAAAAACAACAAACAAGTTTGACCTCAAATCAGGTAGGATTACC 33

Query 601 CGCTGAACTTAAGCATATCAATAAGCGGAGGA 632
          |||
Sbjct 32 CGCTGAACTTAAGCATATCAATAAGCGGAGGA 1

```

>gb|EU604759.1| *Candida* sp. C22 internal transcribed spacer 1, partial sequence; 5.8S ribosomal RNA gene and internal transcribed spacer 2, complete sequence; and 28S ribosomal RNA gene, partial sequence  
Length=593

Score = 1086 bits (588), Expect = 0.0  
Identities = 591/592 (99%), Gaps = 1/592 (0%)  
Strand=Plus/Plus

```

Query 42 TTGCCAGCGCTTAATTGCGCGGCGATTAAACCTTACACACAATGTTTTTCTTTATTAGAA 101
          |||
Sbjct 1 TTGCCAGCGCTTAATTGCGCGGCGATTAAACCTTACACACAATGTTTTTCTTTATTAGAA 60

Query 102 ACTATTGCTTTGGCTTGGCTAAGAAATTAGTCGGGCCAGAGGTTTACACAACTTCAATT 161
          |||
Sbjct 61 ACTATTGCTTTGGCTTGGCTAAGAAATTAGTCGGGCCAGAGGTTTACACAACTTCAATT 120

Query 162 TTTAATTGAATTGTTATTTAATACTTTGTCAATTTGTTGATTAAATTCAAACAATCTTCA 221
          |||
Sbjct 121 TTTAATTGAATTGTTATTTAATACTTTGTCAATTTGTTGATTAAATTCAAACAATCTTCA 180

Query 222 AAACCTTCAACAACGGATCTCTTGGTTCTCGCATCGATGAAGAACGCAGCGAAATGCGAT 281
          |||
Sbjct 181 AAACCTTCAACAACGGATCTCTTGGTTCTCGCATCGATGAAGAACGCAGCGAAATGCGAT 240

Query 282 AAGTAATATGAATTGCAGATTTTCGTGAATCATCGAATCTTTGAACGCACATTGCGCCCT 341
          |||
Sbjct 241 AAGTAATATGAATTGCAGATTTTCGTGAATCATCGAATCTTTGAACGCACATTGCGCCCT 300

Query 342 CTGGTATTCCAGAGGGCATGCCTGTTTGAGCGTCATTTCTCTCTCAAACCCTTGGGTTTG 401
          |||
Sbjct 301 CTGGTATTCCAGAGGGCATGCCTGTTTGAGCGTCATTTCTCTCTCAAACCCTTGGGTTTG 360

Query 402 GTATTGAGTGATACTCTTAGTCGAACTAGGCGTTTGCTTGAAATTTATTGGCATGAGTGA 461
          |||
Sbjct 361 GTATTGAGTGATACTCTTAGTCGAACTAGGCGTTTGCTTGAAATTTATTGGCATGAGTGA 420

Query 462 CGCTGAGAAGTGCATTCAGGAAATATCAATGTATTAGGTTTATCCAACCTCGTTGACAATT 521
          |||
Sbjct 421 CGCTGAGAAGTGCATTCAGGAAATATCAATGTATTAGGTTTATCCAACCTCGTTGACAATT 480

Query 522 CTTGGTTGTGAATTTTTGGTGTTAGGCTTTGCCTTAAAAACAACAAACAAGTTTGACCT 581
          |||
Sbjct 481 CTTGGTTGTGAATTTTTGGTGTTAGGCTTTGCCTTAAAAACAACAAACAAGTTTGACCT 540

Query 582 CAAATCAGGTAGGATTACCCGCTGAACTTAAGCATATCAATAAGC-GGAGGA 632
          |||
Sbjct 541 CAAATCAGGTAGGATTACCCGCTGAACTTAAGCATATCAATAAGCCGGAGGA 592

```

>gb|FJ609219.1| *Candida palmioleophila* strain IHEM 22283 18S ribosomal RNA gene,

partial sequence; and internal transcribed spacer 1, 5.8S  
ribosomal RNA gene, and internal transcribed spacer 2, complete  
sequence  
Length=551

Score = 1018 bits (551), Expect = 0.0  
Identities = 551/551 (100%), Gaps = 0/551 (0%)  
Strand=Plus/Plus

```
Query 23 GATCATTACTGTATTCTAATTGCCAGCGCTTAATTGCGCGGCGATTAAACCTTACACACA 82
      |||
Sbjct 1 GATCATTACTGTATTCTAATTGCCAGCGCTTAATTGCGCGGCGATTAAACCTTACACACA 60

Query 83 ATGTTTTTCTTTATTAGAACTATTGCTTTGGCTTGGCTAAGAAATTAGTCGGGCCAGAG 142
      |||
Sbjct 61 ATGTTTTTCTTTATTAGAACTATTGCTTTGGCTTGGCTAAGAAATTAGTCGGGCCAGAG 120

Query 143 GTTTACACAAACTTCAATTTTAAATTGAATTGTTATTTAATACTTTGTCAATTTGTTGAT 202
      |||
Sbjct 121 GTTTACACAAACTTCAATTTTAAATTGAATTGTTATTTAATACTTTGTCAATTTGTTGAT 180

Query 203 TAAATTCAAACAATCTTCAAACCTTTCAACAACGGATCTCTTGGTTCTCGCATCGATGAA 262
      |||
Sbjct 181 TAAATTCAAACAATCTTCAAACCTTTCAACAACGGATCTCTTGGTTCTCGCATCGATGAA 240

Query 263 GAACGCAGCGAAAATGCGATAAGTAATATGAATTGCAGATTTTCGTGAATCATCGAATCTT 322
      |||
Sbjct 241 GAACGCAGCGAAAATGCGATAAGTAATATGAATTGCAGATTTTCGTGAATCATCGAATCTT 300

Query 323 TGAACGCACATTGCGCCCTCTGGTATTCCAGAGGGCATGCCTGTTTGAGCGTCATTTCTC 382
      |||
Sbjct 301 TGAACGCACATTGCGCCCTCTGGTATTCCAGAGGGCATGCCTGTTTGAGCGTCATTTCTC 360

Query 383 TCTCAAACCCTTGGGTTTGGTATTGAGTGATACTCTTAGTCGAACTAGGCGTTTGCTTGA 442
      |||
Sbjct 361 TCTCAAACCCTTGGGTTTGGTATTGAGTGATACTCTTAGTCGAACTAGGCGTTTGCTTGA 420

Query 443 AATTTATTGGCATGAGTGACGCTGAGAAGTGCATTCAGGAAATATCAATGTATTAGGTTT 502
      |||
Sbjct 421 AATTTATTGGCATGAGTGACGCTGAGAAGTGCATTCAGGAAATATCAATGTATTAGGTTT 480

Query 503 ATCCAACCTCGTTGACAATTCTTGGTTGTGAATTTTTGGTGTTAGGCTTTGCCTTAAAAAA 562
      |||
Sbjct 481 ATCCAACCTCGTTGACAATTCTTGGTTGTGAATTTTTGGTGTTAGGCTTTGCCTTAAAAAA 540

Query 563 CAACAAACAAG 573
      |||
Sbjct 541 CAACAAACAAG 551
```

>emb|FN868154.1| Candida sp. CBS 11774 genomic DNA containing 18S rRNA gene, ITS1,  
5.8S rRNA gene, ITS2, 28S rRNA gene, strain CBS11774  
Length=1154

Score = 1000 bits (541), Expect = 0.0  
Identities = 580/599 (96%), Gaps = 2/599 (0%)  
Strand=Plus/Plus

```
Query 34 TATTCTAATTGCCAGCGCTTAATTGCGCGGCGATTAAACCTTACACACAATGTTTTTCTT 93
      |||
Sbjct 1 TATTCTAATTGCCTGCGCTTAATTGCGCGGCGATTAAACCTTACACACTATGTTTTTCTT 60

Query 94 TATTAGAACTATTGCTTTGGCTTGGCTAAGAAATTAGTCGGGCCAGAGGTTTACACAAA 153
      |||
```



|       |     |                                                                |     |
|-------|-----|----------------------------------------------------------------|-----|
| Sbjct | 61  | TATTAGAAACTATTACTTTGGTTTTGGCTAAGAAATTAGTTGGGCCAGAGGTTT--ATAAA  | 118 |
| Query | 154 | CTTCAATTTTTAATTGAATTGTTATTTAATACTTTGTCAATTTGTTGATTAAATTCAAAC   | 213 |
|       |     |                                                                |     |
| Sbjct | 119 | CTTCAATTTTTAATTGAATTGTTATTTAAAACCTTTGTCAATTTGTTGATTAAATTCAAAC  | 178 |
| Query | 214 | AATCTTCAAAACTTTCAACAACGGATCTCTTGGTTCTCGCATCGATGAAGAACGCAGCGA   | 273 |
|       |     |                                                                |     |
| Sbjct | 179 | AATCTTCAAAACTTTCAACAACGGATCTCTTGGTTCTCGCATCGATGAAGAACGCAGCGA   | 238 |
| Query | 274 | AATGCGATAAGTAATATGAATTGCAGATTTTCGTGAATCATCGAATCTTTGAACGCACAT   | 333 |
|       |     |                                                                |     |
| Sbjct | 239 | AATGCGATAAGTAATATGAATTGCAGATTTTCGTGAATCATCGAATCTTTGAACGCACAT   | 298 |
| Query | 334 | TGCGCCCTCTGGTATTCCAGAGGGCATGCCTGTTTGAGCGTCATTTCTCTCTCAAACCT    | 393 |
|       |     |                                                                |     |
| Sbjct | 299 | TGCGCCCTCTGGTATTCCAGAGGGCATGCCTGTTTGAGCGTCATTTCTCTCTCAAACCT    | 358 |
| Query | 394 | TGGGTTTGGTATTGAGTGATACTCTTAGTCGAACTAGGCGTTTGCTTGAAATTTATTGGC   | 453 |
|       |     |                                                                |     |
| Sbjct | 359 | CGGGTTTGGTATTGAGTGATACTCTTAGTCGAACTAGGCGTTTGCTTGAAATTTATTGGC   | 418 |
| Query | 454 | ATGAGTGACGCTGAGAAGTGCATTTCAGGAAATATCAATGTATTAGGTTTATCCAACCTCGT | 513 |
|       |     |                                                                |     |
| Sbjct | 419 | ATGAGTGATGCTAAAAAGTGCATTTCAGGAACTATCAATGTATTAGGTTTATCCAACCTCGT | 478 |
| Query | 514 | TGACAATTCTTGGTTGTGAATTTTTGGTGTAGGCTTTGCCTTAAAAACAACAACAAG      | 573 |
|       |     |                                                                |     |
| Sbjct | 479 | TGACAATCCTTGATTGTGAATTTTTAGTGTAGGCTTTGCCTTATAAAAAACAACAACAAG   | 538 |
| Query | 574 | TTTGACCTCAAATCAGGTAGGATTACCCGCTGAACTTAAGCATATCAATAAGCGGAGGA    | 632 |
|       |     |                                                                |     |
| Sbjct | 539 | TTTGACCTCAAATCAGGTAGGATTACCCGCTGAACTTAAGCATATCAATAAGCGGAGGA    | 597 |

>dbj|AB016583.1| Candida palmiophila 5.8S rRNA gene, strain JCM 5218, complete sequence  
Length=538

Score = 966 bits (523), Expect = 0.0  
Identities = 538/544 (98%), Gaps = 6/544 (1%)  
Strand=Plus/Plus

|       |     |                                                              |     |
|-------|-----|--------------------------------------------------------------|-----|
| Query | 31  | CTGTATTCTAATTGCCAGCGCTTAATTGCGCGGCGATTAAACCTTACACACAATGTTTTT | 90  |
|       |     |                                                              |     |
| Sbjct | 1   | CTGTATTCTAATTGCCAGCGCTTAATTGCGCGGCGATTAAACCTTACACACAATGTTTTT | 60  |
| Query | 91  | CTTTATTAGAAACTATTGCTTTGGCTTGGCTAAGAAATTAGTCGGGCCAGAGGTTTACAC | 150 |
|       |     |                                                              |     |
| Sbjct | 61  | CTTTATTAGAAACTATTGCTTTGGCTTGGCTAAGAAATTAGTCGGGCCAGAGGTTTACAC | 120 |
| Query | 151 | AAACTTCAATTTTTAATTGAATTGTTATTTAATACTTTGTCAATTTGTTGATTAAATTCA | 210 |
|       |     |                                                              |     |
| Sbjct | 121 | AAACTTCAATTTTTAATTGAATTGTTATTTAATACTTTGTCAATTTGTTGATTAAATTCA | 180 |
| Query | 211 | AACAATCTTCAAAACTTTCAACAACGGATCTCTTGGTTCTCGCATCGATGAAGAACGCAG | 270 |
|       |     |                                                              |     |
| Sbjct | 181 | AACAATCTTCAAAACTTTCAACAACGGATCTCTTGGTTCTCGCATCGATGAAGAACGCAG | 240 |
| Query | 271 | CGAAATGCGATAAGTAATATGAATTGCAGATTTTCGTGAATCATCGAATCTTTGAACGCA | 330 |
|       |     |                                                              |     |
| Sbjct | 241 | CGAAATGCGATAAGTAATATGAATTGCAGATTTTCGTGAATCATCGAATCTTTGAACGCA | 300 |
| Query | 331 | CATTGCGCCCTCTGGTATTCCAGAGGGCATGCCTGTTTGAGCGTCATTTCTCTCTCAAAC | 390 |

```

Sbjct 301 |||||CATTGCGCCCTCTGGTATTCCAGAGGGCATGCCTGTTTGAGCGTCATTTCTCTCTCAAAC 360
Query 391 CCTTGGGTTTGGTATTGAGTGATACTCTTAGTCGAACTAGGCGTTTGCTTGAAATTTATT 450
Sbjct 361 |||||CCTTGGGTTTGGTATTGAGTGATACTCTTAGTCGAACTAGGCGTTTGCTTGAAATTTATT 420
Query 451 GGCATGAGTGACGCTGAGAAGTGCATTTCAGGAAATATCAATGTATTAGGTTTATCCAAC 510
Sbjct 421 |||||GGCATGAGTGACGCTGAGAAGTGCATTTCAGGAAATATCAATGTATTAGGTTTATCCAAC 480
Query 511 CGTTGACAATTCTTGGTTGTGAATTTTGGTGTTAGGCTTTGCCTTAAAAACAACAAAC 570
Sbjct 481 |||||CGTTGACAATTCTTGGTTGTGAATTTT-G-TGTTAG-CTT-GCCT-AAAAACA-CAAAC 534
Query 571 AAGT 574
Sbjct 535 |||||AAGT 538

```

>dbj|AB016582.1| *Candida palmioleophila* 5.8S rRNA gene, strain JCM 6896, complete sequence  
Length=538

Score = 966 bits (523), Expect = 0.0  
Identities = 538/544 (98%), Gaps = 6/544 (1%)  
Strand=Plus/Plus

```

Query 31 CTGTATTCTAATTGCCAGCGCTTAATTGCGCGGCGATTAAACCTTACACACAATGTTTTT 90
Sbjct 1 |||||CTGTATTCTAATTGCCAGCGCTTAATTGCGCGGCGATTAAACCTTACACACAATGTTTTT 60
Query 91 CTTTATTAGAAACTATTGCTTTGGCTTGGCTAAGAAATTAGTCGGGCCAGAGGTTTACAC 150
Sbjct 61 |||||CTTTATTAGAAACTATTGCTTTGGCTTGGCTAAGAAATTAGTCGGGCCAGAGGTTTACAC 120
Query 151 AAACCTCAATTTTAAATTGAATTGTTATTTAATACTTTGTCAATTTGTTGATTAAATTCA 210
Sbjct 121 |||||AAACCTCAATTTTAAATTGAATTGTTATTTAATACTTTGTCAATTTGTTGATTAAATTCA 180
Query 211 AACAACTTTCAAACTTTCAACAACGGATCTCTTGGTTCTCGCATCGATGAAGAACGCAG 270
Sbjct 181 |||||AACAACTTTCAAACTTTCAACAACGGATCTCTTGGTTCTCGCATCGATGAAGAACGCAG 240
Query 271 CGAAATGCGATAAGTAATATGAATTGCAGATTTTTCGTGAATCATCGAATCTTTGAACGCA 330
Sbjct 241 |||||CGAAATGCGATAAGTAATATGAATTGCAGATTTTTCGTGAATCATCGAATCTTTGAACGCA 300
Query 331 CATTGCGCCCTCTGGTATTCCAGAGGGCATGCCTGTTTGAGCGTCATTTCTCTCTCAAAC 390
Sbjct 301 |||||CATTGCGCCCTCTGGTATTCCAGAGGGCATGCCTGTTTGAGCGTCATTTCTCTCTCAAAC 360
Query 391 CCTTGGGTTTGGTATTGAGTGATACTCTTAGTCGAACTAGGCGTTTGCTTGAAATTTATT 450
Sbjct 361 |||||CCTTGGGTTTGGTATTGAGTGATACTCTTAGTCGAACTAGGCGTTTGCTTGAAATTTATT 420
Query 451 GGCATGAGTGACGCTGAGAAGTGCATTTCAGGAAATATCAATGTATTAGGTTTATCCAAC 510
Sbjct 421 |||||GGCATGAGTGACGCTGAGAAGTGCATTTCAGGAAATATCAATGTATTAGGTTTATCCAAC 480
Query 511 CGTTGACAATTCTTGGTTGTGAATTTTGGTGTTAGGCTTTGCCTTAAAAACAACAAAC 570
Sbjct 481 |||||CGTTGACAATTCTTGGTTGTGAATTTT-G-TGTTAG-CTT-GCCT-AAAAACA-CAAAC 534

```

Query 571 AAGT 574  
||||  
Sbjct 535 AAGT 538

>gb|FJ873416.1| Candida sp. GA1S01 internal transcribed spacer 1, partial sequence;  
5.8S ribosomal RNA gene and internal transcribed spacer  
2, complete sequence; and 26S ribosomal RNA gene, partial  
sequence  
Length=553

Score = 946 bits (512), Expect = 0.0  
Identities = 543/557 (97%), Gaps = 5/557 (0%)  
Strand=Plus/Plus

Query 48 GCGCTTAATTGCGCGGCGATTAAACCTTACACACAATGTTTTTCTTTATTAGAACTATT 107  
||||| ||||||||||||||||||||||| |||||||||||||||||||||||  
Sbjct 1 GCGCTT-ATTGCGCGGCGATTAAACCTTATAACACAATGTTTTTCTTTATTAGAACTATT 59  
  
Query 108 GCTTTGGCTTGGCTAAGAAATTAGTTCGGGCCAGAGGTTTACACAACTTCAATTTTTAAT 167  
||||| ||||||||||||||||||| ||||||||||||||| | |||||||||||||||  
Sbjct 60 ACTTTGGTTTGGCTAAGAAATTAGTTGGGCCAGAGGTTT--ATAAACTTCAATTTTTAAT 117  
  
Query 168 TGAATTGTTATTTAATACTTTGTCAATTTGTTGATTAAATTCAAACAATCTTCAAACCTT 227  
||||||||||||||||| ||||||||||||||||||| |||||||||||||||||||  
Sbjct 118 TGAATTGTTATTTAATTCTTTGTCAATTTGTTGATTAAATTCAAACAATCTTCAAACCTT 177  
  
Query 228 TCAACAACGGATCTCTTGGTTCTCGCATCGATGAAGAACGCAGCGAAATGCGATAAGTAA 287  
||||||||||||||||| ||||||||||||||||||| |||||||||||||||||||  
Sbjct 178 TCAACAACGGATCTCTTGGTTCTCGCATCGATGAAGAACGCAGCGAAATGCGATAAGTAA 237  
  
Query 288 TATGAATTGCAGATTTTCGTGAATCATCGAATCTTTGAACGCACATTGCGCCCTCTGGTA 347  
||||||||||||||||| ||||||||||||||||||| |||||||||||||||||||  
Sbjct 238 TATGAATTGCAGATTTTCGTGAATCATCGAATCTTTGAACGCACATTGCGCCCTCTGGTA 297  
  
Query 348 TTCCAGAGGGCATGCCTGTTTGAGCGTCATTTCTCTCTCAAACCCTT-GGGTTTGGTATT 406  
||||||||||||||||| ||||||||||||||||||| |||||||||||||||||||  
Sbjct 298 TTCCAGAGGGCATGCCTGTTTGAGCGTCATTTCTCTCTCAAACC-TTCGGTTTGGTATT 356  
  
Query 407 GAGTGATACTCTTAGTCGAACTAGGCGTTTGCTTGAAATTTATTGGCATGAGTGACGCTG 466  
||||||||||||||||| ||||||||||||||||||| ||||||||||||||| |||  
Sbjct 357 GAGTGATACTCTTAGTCGAACTAGGCGTTTGCTTGAAATTTATTGGCATGAGTGATGCTA 416  
  
Query 467 AGAAGTGCATTCAGGAAATATCAATGTATTAGGTTTATCCAACCTCGTTGACAATTCTTGG 526  
||||||||||||||||| ||||||||||||||||||| |||||||||||||||||||  
Sbjct 417 AGAAGTGCATTCAGGAAATATCAATGTATTAGGTTTATCCAACCTCGTTGACAATTCTTGG 476  
  
Query 527 TTGTGAATTTTTGGTGTTAGGCTTTGCCTTAAAAACAACAACAAGTTTGACCTCAAAT 586  
||||||||||||||||| ||||||||||||||||||| |||||||||||||||||||  
Sbjct 477 TTGTGAATTTTTAGTGTTAGGCTTTGCCTTAAAAACAACAACAAGTTTGACCTCAAAT 536  
  
Query 587 CAGGTAGGATTACCCGC 603  
|||||||||||||||||  
Sbjct 537 CAGGTAGGATTACCCGC 553

>gb|DQ409166.1| Pichia segobiensis strain CECT 10210 18S ribosomal RNA gene,  
partial sequence; internal transcribed spacer 1, 5.8S ribosomal  
RNA gene, and internal transcribed spacer 2, complete sequence;  
and 26S ribosomal RNA gene, partial sequence  
Length=628

Score = 904 bits (489), Expect = 0.0  
Identities = 590/637 (92%), Gaps = 14/637 (2%)

Strand=Plus/Plus

```
Query 1 TCCGTAGGTGAACCTGCGGAAGGATCATTACTGTATTCTAATTGCCAGCGCTTAATTGCG 60
      |||
Sbjct 1 TCCGTAGGTGAACCTGCGGAAGGATCATTACAGTATTCTTTTGGCCAGCGCTTAAGTGGC 60

Query 61 CGGCGATTAAACCTTACACACAATGTTTTCTTTATTAGAAACTATTGCTTTGGCTTGGC 120
      |||
Sbjct 61 CGGCGAAAAAACCTTACACACAGTG-TTTTCTTTATTAGAAACTATTGCTTTGGTTTGGC 119

Query 121 TAAGAAATTAGTCGGGCCAGAGGTTTACACAACTTCAATTTTTAATTGAATTGTTA-TT 179
      |
Sbjct 120 TCAGAAATGAGTTGGGCCAGAGGTTTAC-CAAACCTCAA-TTTT-ATTGAATTGTTATTT 176

Query 180 TAATACTTTGTCAATTTGTTGATTAAATTCAAACAATCTTCAAAACTTTCAACAACGGAT 239
      ||
Sbjct 177 TATTAATTTGTCAATTTGTTGATTAAATTCAA- AATCTTCAAAACTTTCAACAACGGAT 235

Query 240 CTCTTGGTTCTCGCATCGATGAAGAACGCAGCGAAATGCGATAAGTAATATGAATTGCAG 299
      |||
Sbjct 236 CTCTTGGTTCTCGCATCGATGAAGAACGCAGCGAAATGCGATAAGTAATATGAATTGCAG 295

Query 300 ATTTTCGTGAATCATCGAATCTTTGAACGCACATTGCGCCCTCTGGTATTCCAGAGGGCA 359
      |||
Sbjct 296 ATTTTCGTGAATCATCGAATCTTTGAACGCACATTGCGCCCTTTGGTATTCCAAAGGGCA 355

Query 360 TGCCTGTTTGAGCGTCATTTCTCTCTCAAACCCTTGGGTTTGGTATTGAGTGATACTCTT 419
      |||
Sbjct 356 TGCCTGTTTGAGCGTCATTTCTCTCTCAAACCCTCGGGTTTGGTATTGAGTGATACTCTT 415

Query 420 AGTCGAACTAGGCGTTTGCTTGAAATTTATTGGCATGAGTGACGCTGAGA-AGTGCATT- 477
      |||
Sbjct 416 AGTCGAACTAGGCGTTTGCTTGAAAAGTATTGGCACGAGTGGTACTAA-ATAGTAC-TGA 473

Query 478 CAGGAA-ATATCAATGTATTAGGTTTATCCAACCTCGTTGACAATTCTTGGTTGTGAATTT 536
      |||
Sbjct 474 CAG-AATATTTCAATGTATTAGGTTTATCCAACCTCGTTGAGACTTCT-GGCGGTGAATTT 531

Query 537 TTGGTGT-TAGGCTTTGCCTTAAAAACAACAACAAGTTTGACCTCAAATCAGGTAGGA 595
      |||
Sbjct 532 TTGGTATATTGGCTTTGCCTTACAAAACAACAACAAGTTTGACCTCAAATCAGGTAGGA 591

Query 596 TTACCCGCTGAACTTAAGCATATCAATAAGCGGAGGA 632
      |||
Sbjct 592 TTACCCGCTGAACTTAAGCATATCAATAAGCGGAGGA 628
```

>emb|AJ606464.1| *Candida shehatae* var. *shehatae* 18S rRNA gene (partial), 5.8S rRNA gene, 26S rRNA (partial) gene, ITS1 and ITS2, strain CBS 5813  
Length=783

Score = 904 bits (489), Expect = 0.0  
Identities = 594/642 (92%), Gaps = 17/642 (2%)  
Strand=Plus/Plus

```
Query 1 TCCGTAGGTGAACCTGCGGAAGGATCATTACTGTATTCTAATTGCCAGCGCTTAATTGCG 60
      |||
Sbjct 3 TCCGTAGGTGAACCTGCGGAAGGATCATTACAGTATTCTTTTGGCCAGCGCTTAAGTGGC 62

Query 61 CGGCGATTAAACCTTACACACAATGTTTTCTTTATTAGAAACTATTGCTTTGGCT-TGG 119
      |||
Sbjct 63 CGGCGAAAAAACCTTACACACAGTG-TTTTCTTTATTAGAAACTATTGCTTTGG-TCTGG 120
```

```

Query 120 CTAAGAAATTAGTCGGGCCAGAGGTTTACACAACTTCAATTTT-TAATTGAATTGTTA- 177
          || ||||| ||| ||||| ||||| ||| ||||| ||||| ||| ||||| ||||| ||| ||||| ||||| |||
Sbjct 121 CTTAGAAATAAGTTGGGCCAGAGGTTAAC-CAAACCTTCAATTTTATTATTGAATTGTTAT 179

Query 178 TTTA-ATACTTTGTCAATTTGTTGATTAAATTCAAACAATCTTCAAACTTTCAACAACG 236
          ||||| || ||||| ||||| ||||| ||||| ||||| ||||| ||||| ||||| ||||| ||||| |||||
Sbjct 180 TTTATTTAATTTGTCAATTTGTTGATTAAATTCAAAAATCTTCAAACTTTCAACAACG 239

Query 237 GATCTCTTGGTTCTCGCATCGATGAAGAACGCAGCGAAATGCGATAAGTAATATGAATTG 296
          ||||| ||||| ||||| ||||| ||||| ||||| ||||| ||||| ||||| ||||| ||||| ||||| |||||
Sbjct 240 GATCTCTTGGTTCTCGCATCGATGAAGAACGCAGCGAAATGCGATAAGTAATATGAATTG 299

Query 297 CAGATTTTCGTGAATCATCGAATCTTTGAACGCACATTGCGCCCTCTGGTATTCCAGAGG 356
          ||||| ||||| ||||| ||||| ||||| ||||| ||||| ||||| ||||| ||||| ||||| ||||| |||||
Sbjct 300 CAGATTTTCGTGAATCATCGAATCTTTGAACGCACATTGCGCCCTTTGGTATTCCAGAGG 359

Query 357 GCATGCCTGTTTGAGCGTCATTTCTCTCTCAAACCTTGGGTTTGGTATTGAGTGATACT 416
          ||||| ||||| ||||| ||||| ||||| ||||| ||||| ||||| ||||| ||||| ||||| ||||| |||||
Sbjct 360 GCATGCCTGTTTGAGCGTCATTTCTCTCTCAAAGCCTCGGGTTTGGTATTGAGTGATACT 419

Query 417 CTTAGTC-GAACTAGGCGTTTGCTTGAAATTTATTGGCATGAGT-G-ACGCTGAGA-AGT 472
          ||||| || ||||| ||||| ||||| ||||| ||||| ||||| ||||| ||||| ||||| ||||| |||||
Sbjct 420 CTTAGTCAGA-CTAGGCGTTTGCTTGAAAAGTATCGGCATGAGTAGTAC--T-AGATAGT 475

Query 473 GCATTCAGGAAATATCAATGTATTAGGTTTATCCAACCTC-GTTGACAATTCTTGGTTGTG 531
          || ||||| || ||||| ||||| ||||| ||||| ||||| ||||| ||||| ||||| ||||| ||||| |||||
Sbjct 476 GCTTTTCAGGATATTTCAATGTATTAGGTTTATCCAACCTCCGTTGAGAATTCTTGGTAGTG 535

Query 532 AATTTTTGGTGTTA-GGCTTTGCCTTAAAAACAACAACAAGTTTGACCTCAAATCAGG 590
          ||||| || || || ||||| ||||| ||||| ||||| ||||| ||||| ||||| ||||| ||||| |||||
Sbjct 536 AATTTTTAGTATCATGGCTCTGCCTTACAAAACAACAACAAGTTTGACCTCAAATCAGG 595

Query 591 TAGGATTACCCGCTGAACTTAAGCATATCAATAAGCGGAGGA 632
          ||||| ||||| ||||| ||||| ||||| ||||| ||||| ||||| ||||| ||||| ||||| |||||
Sbjct 596 TAGGATTACCCGCTGAACTTAAGCATATCAATAAGCGGAGGA 637

```

>dbj|AB513338.1| Pichia sp. MT-LUC0016 genes for 18S rRNA, ITS1, 5.8S rRNA, ITS2, 26S rRNA, partial and complete sequence  
Length=653

Score = 898 bits (486), Expect = 0.0  
Identities = 589/637 (92%), Gaps = 14/637 (2%)  
Strand=Plus/Plus

```

Query 1 TCCGTAGGTGAACCTGCGGAAGGATCATTACTGTATTCTAATTGCCAGCGCTTAATTGCG 60
          ||||| ||||| ||||| ||||| ||||| ||||| ||||| ||||| ||||| ||||| ||||| ||||| |||||
Sbjct 26 TCCGTAGGTGAACCTGCGGAAGGATCATTACAGTATTCTTTTGGCAGCGCTTAACTGCG 85

Query 61 CGGCGATTAAACCTTACACACAATGTTTTCTTTATTAGAACTATTGCTTTGGCTTGGC 120
          ||||| ||||| ||||| ||||| ||||| ||||| ||||| ||||| ||||| ||||| ||||| ||||| |||||
Sbjct 86 CGGCGAAAAAACCTTACACACAGTG-TTTTCTTTATTAGAACTATTGCTTTGGTTTGGC 144

Query 121 TAAGAAATTAGTCGGGCCAGAGGTTTACACAACTTCAATTTTAAATTGAATTGTTA-TT 179
          | ||||| ||| ||||| ||||| ||||| ||||| ||||| ||||| ||||| ||||| ||||| ||||| |||||
Sbjct 145 TCAGAAATGAGTTGGGCCAGAGGTTTAC-CAAACCTCAA-TTTT-ATTGAATTGTTATTT 201

Query 180 TAATACTTTGTCAATTTGTTGATTAAATTCAAACAATCTTCAAACTTTCAACAACGGAT 239
          || || || ||||| ||||| ||||| ||||| ||||| ||||| ||||| ||||| ||||| ||||| |||||
Sbjct 202 TATTAATTTGTCAATTTGTTGATTAAATTCAAA-AATCTTCAAACTTTCAACAACGGAT 260

Query 240 CTCTTGGTTCTCGCATCGATGAAGAACGCAGCGAAATGCGATAAGTAATATGAATTGCAG 299
          ||||| ||||| ||||| ||||| ||||| ||||| ||||| ||||| ||||| ||||| ||||| ||||| |||||
Sbjct 261 CTCTTGGTTCTCGCATCGATGAAGAACGCAGCGAAATGCGATAAGTAATATGAATTGCAG 320

```

```

Query 300 ATTTTCGTGAATCATCGAATCTTTGAACGCACATTGCGCCCTCTGGTATTCCAGAGGGCA 359
          |||
Sbjct 321 ATTTTCGTGAATCATCGAATCTTTGAACGCACATTGCGCCCTTTGGTATTCCAAAGGGCA 380

Query 360 TGCCTGTTTGGAGCGTCATTTCTCTCTCAAACCCTTGGGTTTGGTATTGAGTGATACTCTT 419
          |||
Sbjct 381 TGCCTGTTTGGAGCGTCATTTCTCTCTCAAACCCTCGGGTTTGGTATTGAGTGATACTCTT 440

Query 420 AGTCGAACTAGGCGTTTGCTTGAAATTTATTGGCATGAGTGACGCTGAGA-AGTGCATT- 477
          |||
Sbjct 441 AGTTGAACTAGGCGTTTGCTTGAAAAGTATTGGCAGGAGTGGTACTAA-ATAGTAC-TGA 498

Query 478 CAGGAA-ATATCAATGTATTAGGTTTATCCAACCTCGTTGACAATTCTTGGTTGTGAATTT 536
          |||
Sbjct 499 CAG-AATATTTCAATGTATTAGGTTTATCCAACCTCGTTGAGACTTCT-GGCGGTGAATTT 556

Query 537 TTGGTGT-TAGGCTTTCCTTAAAAACAACAACAAGTTTGACCTCAAATCAGGTAGGA 595
          |||
Sbjct 557 TTGGTATATTGGCTTTCCTTAAAAACAACAACAAGTTTGACCTCAAATCAGGTAGGA 616

Query 596 TTACCCGCTGAACTTAAGCATATCAATAAGCGGAGGA 632
          |||
Sbjct 617 TTACCCGCTGAACTTAAGCATATCAATAAGCGGAGGA 653

```

>dbj|AB513336.1| Pichia sp. MT-LUC0012 genes for 18S rRNA, ITS1, 5.8S rRNA, ITS2, 26S rRNA, partial and complete sequence  
Length=653

Score = 898 bits (486), Expect = 0.0  
Identities = 589/637 (92%), Gaps = 14/637 (2%)  
Strand=Plus/Plus

```

Query 1 TCCGTAGGTGAACCTGCGGAAGGATCATTACTGTATTCTAATTGCCAGCGCTTAATTGCG 60
          |||
Sbjct 26 TCCGTAGGTGAACCTGCGGAAGGATCATTACAGTATTCTTTTGGCCAGCGCTTAACTGCG 85

Query 61 CGGCGATTAAACCTTACACACAATGTTTTCTTTATTAGAACTATTGCTTTGGCTTGGC 120
          |||
Sbjct 86 CGGCGAAAAACCTTACACACAGTG-TTTCTTTATTAGAACTATTGCTTTGGTTTGGC 144

Query 121 TAAGAAATTAGTCGGGCCAGAGGTTTACACAACTTCAATTTTAAATTGAATTGTTA-TT 179
          |||
Sbjct 145 TCAGAAATGAGTTGGGCCAGAGGTTTAC-CAAACCTCAA-TTTT-ATTGAATTGTTATTT 201

Query 180 TAATACTTTGTCAATTTGTTGATTAAATTCAAACAATCTTCAAACTTTCAACAACGGAT 239
          |||
Sbjct 202 TATTAATTTGTCAATTTGTTGATTAAATTCAA- AATCTTCAAACTTTCAACAACGGAT 260

Query 240 CTCTTGGTTCTCGCATCGATGAAGAACGCAGCGAAATGCGATAAGTAATATGAATTGCAG 299
          |||
Sbjct 261 CTCTTGGTTCTCGCATCGATGAAGAACGCAGCGAAATGCGATAAGTAATATGAATTGCAG 320

Query 300 ATTTTCGTGAATCATCGAATCTTTGAACGCACATTGCGCCCTCTGGTATTCCAGAGGGCA 359
          |||
Sbjct 321 ATTTTCGTGAATCATCGAATCTTTGAACGCACATTGCGCCCTTTGGTATTCCAAAGGGCA 380

Query 360 TGCCTGTTTGGAGCGTCATTTCTCTCTCAAACCCTTGGGTTTGGTATTGAGTGATACTCTT 419
          |||
Sbjct 381 TGCCTGTTTGGAGCGTCATTTCTCTCTCAAACCCTCGGGTTTGGTATTGAGTGATACTCTT 440

Query 420 AGTCGAACTAGGCGTTTGCTTGAAATTTATTGGCATGAGTGACGCTGAGA-AGTGCATT- 477
          |||

```



Sbjct 616 |||...||| ATTACCCGCTGAACTTAAGCATATCAATAAGCGGAGGA 653

>dbj|AB513334.1| Pichia sp. MT-LUC0008 genes for 18S rRNA, ITS1, 5.8S rRNA, ITS2, 26S rRNA, partial and complete sequence Length=653

Score = 898 bits (486), Expect = 0.0  
Identities = 589/637 (92%), Gaps = 14/637 (2%)  
Strand=Plus/Plus

Query 1 TCCGTAGGTGAACCTGCGGAAGGATCATTACTGTATTCTAATTGCCAGCGCTTAATTGCG 60  
Sbjct 26 TCCGTAGGTGAACCTGCGGAAGGATCATTACAGTATTCTTTTGGCCAGCGCTTAAGTGGC 85  
Query 61 CGGCGATTAAACCTTACACACAATGTTTTCTTTATTAGAAACTATTGCTTTGGCTTGGC 120  
Sbjct 86 CGGCGAAAAAACCTTACACACAGTG-TTTTCTTTATTAGAAACTATTGCTTTGGTTTGGC 144  
Query 121 TAAGAAATTAGTCGGGCCAGAGGTTTACACAAACTTCAATTTTTAATTGAATTGTTA-TT 179  
Sbjct 145 TCAGAAATGAGTTGGGCCAGAGGTTTAC-CAAACCTCAA-TTTT-ATTGAATTGTTATTT 201  
Query 180 TAATACTTTGTCAATTTGTTGATTAAATTCAAACAATCTTCAAAACTTTCAACAACGGAT 239  
Sbjct 202 TATTAATTTGTCAATTTGTTGATTAAATTCAAA-AATCTTCAAAACTTTCAACAACGGAT 260  
Query 240 CTCTTGGTTCTCGCATCGATGAAGAACGCAGCGAAATGCGATAAGTAATATGAATTGCAG 299  
Sbjct 261 CTCTTGGTTCTCGCATCGATGAAGAACGCAGCGAAATGCGATAAGTAATATGAATTGCAG 320  
Query 300 ATTTTCGTGAATCATCGAATCTTTGAACGCACATTGCGCCCTCTGGTATTCCAGAGGGCA 359  
Sbjct 321 ATTTTCGTGAATCATCGAATCTTTGAACGCACATTGCGCCCTTTGGTATTCCAAAGGGCA 380  
Query 360 TGCCTGTTTGAGCGTCATTTCTCTCTCAAACCCTGGGTTTGGTATTGAGTGATACTCTT 419  
Sbjct 381 TGCCTGTTTGAGCGTCATTTCTCTCTCAAACCCTCGGTTTGGTATTGAGTGATACTCTT 440  
Query 420 AGTCGAACTAGGCGTTTGCTTGAAATTTATTGGCATGAGTGACGCTGAGA-AGTGCATT- 477  
Sbjct 441 AGTCGAACTAGGCGTTTGCTTGAAAAGTATTGGCACGAGTGGTACTAA-ATAGTAC-TGA 498  
Query 478 CAGGAA-ATATCAATGTATTAGGTTTATCCAACCTCGTTGACAATTCTTGGTTGTGAATTT 536  
Sbjct 499 CAG-AATATTTCAATGTATTAGGTTTATCCAACCTCGTTGAGACTTCT-GGCGGTGAATTT 556  
Query 537 TTGGTGT-TAGGCTTTGCCTTAAAAACAACAACAAGTTTGACCTCAAATCAGGTAGGA 595  
Sbjct 557 TTGGTATATTTGCTTTGCCTTACAAAACAACAACAAGTTTGACCTCAAATCAGGTAGGA 616  
Query 596 TTACCCGCTGAACTTAAGCATATCAATAAGCGGAGGA 632  
Sbjct 617 TTACCCGCTGAACTTAAGCATATCAATAAGCGGAGGA 653

>dbj|AB513333.1| Pichia sp. MT-LUC0007 genes for 18S rRNA, ITS1, 5.8S rRNA, ITS2, 26S rRNA, partial and complete sequence Length=653

Score = 898 bits (486), Expect = 0.0  
Identities = 589/637 (92%), Gaps = 14/637 (2%)  
Strand=Plus/Plus



```

Query 1 TCCGTAGGTGAACCTGCGGAAGGATCATTACTGTATTCTAATTGCCAGCGCTTAATTGCG 60
      |||
Sbjct 26 TCCGTAGGTGAACCTGCGGAAGGATCATTACAGTATTCTTTTGGCCAGCGCTTAAGTGGC 85

Query 61 CGGCGATTAAACCTTACACACAATGTTTTCTTTATTAGAAACTATTGCTTTGGCTTGGC 120
      |||
Sbjct 86 CGGCGAAAAAACCTTACACACAGTG-TTTTCTTTATTAGAAACTATTGCTTTGGTTTGGC 144

Query 121 TAAGAAATTAGTCGGGCCAGAGGTTTACACAACTTCAATTTTTAATTGAATTGTTA-TT 179
      |
Sbjct 145 TCAGAAATGAGTTGGGCCAGAGGTTTAC-CAAACCTCAA-TTTT-ATTGAATTGTTATTT 201

Query 180 TAATACTTTGTCAATTTGTTGATTAAATTCAAACAATCTTCAAAACTTTCAACAACGGAT 239
      ||
Sbjct 202 TATTAATTTGTCAATTTGTTGATTAAATTCAA- AATCTTCAAAACTTTCAACAACGGAT 260

Query 240 CTCTTGGTTCTCGCATCGATGAAGAACGCAGCGAAATGCGATAAGTAATATGAATTGCAG 299
      |||
Sbjct 261 CTCTTGGTTCTCGCATCGATGAAGAACGCAGCGAAATGCGATAAGTAATATGAATTGCAG 320

Query 300 ATTTTCGTGAATCATCGAATCTTTGAACGCACATTGCGCCCTCTGGTATTCCAGAGGGCA 359
      |||
Sbjct 321 ATTTTCGTGAATCATCGAATCTTTGAACGCACATTGCGCCCTTTGGTATTCCAAAGGGCA 380

Query 360 TGCCTGTTTGAGCGTCATTTCTCTCTCAAACCCTGGGTTTGGTATTGAGTGATACTCTT 419
      |||
Sbjct 381 TGCCTGTTTGAGCGTCATTTCTCTCTCAAACCCTGGGTTTGGTATTGAGTGATACTCTT 440

Query 420 AGTCGAACTAGGCGTTTGCTTGAAATTTATTGGCATGAGTGACGCTGAGA-AGTGCATT- 477
      |||
Sbjct 441 AGTCGAACTAGGCGTTTGCTTGAAAAGTATTGGCACGAGTGGTACTAA-ATAGTAC-TGA 498

Query 478 CAGGAA-ATATCAATGTATTAGGTTTATCCAACCTCGTTGACAATTCTTGGTTGTGAATTT 536
      |||
Sbjct 499 CAG-AATATTTCAATGTATTAGGTTTATCCAACCTCGTTGAGACTTCT-GGCGGTGAATTT 556

Query 537 TTGGTGT-TAGGCTTTGCCTTAAAAACAACAACAAGTTTGACCTCAAATCAGGTAGGA 595
      |||
Sbjct 557 TTGGTATATTTGCTTTGCCTTACAAAACAACAACAAGTTTGACCTCAAATCAGGTAGGA 616

Query 596 TTACCCGCTGAACTTAAGCATATCAATAAGCGGAGGA 632
      |||
Sbjct 617 TTACCCGCTGAACTTAAGCATATCAATAAGCGGAGGA 653

```

>gb|CP000497.1| *Pichia stipitis* CBS 6054 chromosome 3, complete sequence  
Length=1841851

Features flanking this part of subject sequence:  
606 bp at 5' side: predicted protein  
4526 bp at 3' side: Unknown protein

Score = 898 bits (486), Expect = 0.0  
Identities = 590/638 (92%), Gaps = 16/638 (2%)  
Strand=Plus/Minus

```

Query 1 TCCGTAGGTGAACCTGCGGAAGGATCATTACTGTATTCTAATTGCCAGCGCTTAATTGCG 60
      |||
Sbjct 1709780 TCCGTAGGTGAACCTGCGGAAGGATCATTACAGTATTCTTTTGGCCAGCGCTTAAGTGGC 85
1709721

Query 61 CGGCGATTAAACCTTACACACAATGTTTTCTTTATTAGAAACTATTGCTTTGGCT-TGG 119
      |||

```



```

Sbjct 61 CGGCGAAAAACCTTACACACAGTG-TTTTCTTTATTAGAACTATTGCTTTGG-TCTGG 118
Query 120 CTAAGAAATTAGTCGGGCCAGAGGTTTACACAACTTCAATTTTTAATTGAATTGTTA-T 178
      || ||||| ||| ||||| ||||| ||||| ||||| ||||| ||||| ||||| ||||| |||||
Sbjct 119 CTCAGAAATGAGTTGGGCCAGAGGTTTAC-CAAACCTCAA-TTTT-ATTGAATTGTTATT 175
Query 179 TTAATACTTTGTCAATTTGTTGATTAAATTCAAACAATCTTCAAACTTTCAACAACGGA 238
      ||| || ||||| ||||| ||||| ||||| ||||| ||||| ||||| ||||| ||||| |||||
Sbjct 176 TTATTAATTTGTCAATTTGTTGATTAAATTCAAA-AATCTTCAAACTTTCAACAACGGA 234
Query 239 TCTCTTGGTTCTCGCATCGATGAAGAACGCAGCGAAATGCGATAAGTAATATGAATTGCA 298
      ||||| ||||| ||||| ||||| ||||| ||||| ||||| ||||| ||||| ||||| |||||
Sbjct 235 TCTCTTGGTTCTCGCATCGATGAAGAACGCAGCGAAATGCGATAAGTAATATGAATTGCA 294
Query 299 GATTTTCGTGAATCATCGAATCTTTGAACGCACATTGCGCCCTCTGGTATTCCAGAGGGC 358
      ||||| ||||| ||||| ||||| ||||| ||||| ||||| ||||| ||||| ||||| |||||
Sbjct 295 GATTTTCGTGAATCATCGAATCTTTGAACGCACATTGCGCCCTTTGGTATTCCAAAGGGC 354
Query 359 ATGCCTGTTTGAGCGTCATTTCTCTCTCAAACCTTGGGTTTGGTATTGAGTGATACTCT 418
      ||||| ||||| ||||| ||||| ||||| ||||| ||||| ||||| ||||| ||||| |||||
Sbjct 355 ATGCCTGTTTGAGCGTCATTTCTCTCTCAAACCTCGGGTTTGGTATTGAGTGATACTCT 414
Query 419 TAGTCGAACTAGGCGTTTGCTTGAAAATTTATTGGCATGAGTGACGCTGAGA-AGTGCATT 477
      ||||| ||||| ||||| ||||| ||||| ||||| ||||| ||||| ||||| ||||| |||||
Sbjct 415 TAGTCGAACTAGGCGTTTGCTTGAAAAGTATTGGCAGGAGTGGTACTAA-ATAGTAC-TG 472
Query 478 -CAGGAA-ATATCAATGTATTAGGTTTATCCAACCTCGTTGACAATTCTTGTTGTGAATT 535
      ||| || || ||||| ||||| ||||| ||||| ||||| ||||| ||||| ||||| |||||
Sbjct 473 ACAG-AATATTTCAATGTATTAGGTTTATCCAACCTCGTTGAGACTTCT-GGCGGTGAATT 530
Query 536 TTTGGTGT-TAGGCTTTGCCTTAAAAACAACAACAAGTTTGACCTCAAATCAGGTAGG 594
      ||||| || ||||| ||||| ||||| ||||| ||||| ||||| ||||| ||||| |||||
Sbjct 531 TTTGGTATATTGGCTTTGCCTTACAAAACAACAACAAGTTTGACCTCAAATCAGGTAGG 590
Query 595 ATTACCCGCTGAACTTAAGCATATCAATAAGCGGAGGA 632
      ||||| ||||| ||||| ||||| ||||| ||||| ||||| ||||| ||||| |||||
Sbjct 591 ATTACCCGCTGAACTTAAGCATATCAATAAGCGGAGGA 628

```

>dbj|AB513332.1| Pichia sp. MT-LUC0006 genes for 18S rRNA, ITS1, 5.8S rRNA, ITS2, 26S rRNA, partial and complete sequence  
Length=654

Score = 893 bits (483), Expect = 0.0  
Identities = 589/638 (92%), Gaps = 15/638 (2%)  
Strand=Plus/Plus

```

Query 1 TCCGTAGGTGAACCTGCGGAAGGATCATTACTGTATTCTAATTGCCAGCGCTTAATTGCG 60
      ||||| ||||| ||||| ||||| ||||| ||||| ||||| ||||| ||||| ||||| |||||
Sbjct 26 TCCGTAGGTGAACCTGCGGAAGGATCATTACAGTATTCTTTTGGCAGCGCTTAACTGCG 85
Query 61 CGGCGATTAAACCTTACACACAATGTTTTTCTTTATTAGAACTATTGCTTTGGCT-TGG 119
      ||||| ||||| ||||| ||||| ||||| ||||| ||||| ||||| ||||| ||||| |||||
Sbjct 86 CGGCGAAAAACCTTACACACAGTG-TTTTCTTTATTAGAACTATTGCTTTGG-TCTGG 143
Query 120 CTAAGAAATTAGTCGGGCCAGAGGTTTACACAACTTCAATTTTTAATTGAATTGTTA-T 178
      || ||||| ||||| ||||| ||||| ||||| ||||| ||||| ||||| ||||| |||||
Sbjct 144 CTCAGAAATGAGTTGGGCCAGAGGTTTAC-CAAACCTCAA-TTTT-ATTGAATTGTTATT 200
Query 179 TTAATACTTTGTCAATTTGTTGATTAAATTCAAACAATCTTCAAACTTTCAACAACGGA 238
      ||| || ||||| ||||| ||||| ||||| ||||| ||||| ||||| ||||| |||||
Sbjct 201 TTATTATTTTGTCAATTTGTTGATTAAATTCAAAAATCTTCAAACTTTCAACAACGGA 260
Query 239 TCTCTTGGTTCTCGCATCGATGAAGAACGCAGCGAAATGCGATAAGTAATATGAATTGCA 298

```

```

Sbjct 261  |||...||| 320
Query 299  GATTTTCGTGAATCATCGAATCTTTGAACGCACATTGCGCCCTCTGGTATTCCAGAGGGC 358
Sbjct 321  GATTTTCGTGAATCATCGAATCTTTGAACGCACATTGCGCCCTTTGGTATTCCAAAGGGC 380
Query 359  ATGCCTGTTTGAGCGTCATTTCTCTCTCAAACCCTGGGTTTGGTATTGAGTGATACTCT 418
Sbjct 381  ATGCCTGTTTGAGCGTCATTTCTCTCTCAAACCCTCGGGTTTGGTATTGAGTGATACTCT 440
Query 419  TAGTCGAACCTAGGCGTTTGCTTGAAATTTATTGGCATGAGTGACGCTGAGA-AGTGCATT 477
Sbjct 441  TAGTCGAACCTAGGCGTTTGCTTGAAAAGTATTGGCAGGAGTGGTACTAA-ATAGTAC-TG 498
Query 478  -CAGGAA-ATATCAATGTATTAGGTTTATCCAACCTCGTTGACAATTCTTGGTTGTGAATT 535
Sbjct 499  ACAG-AATATTTCAATGTATTAGGTTTATCCAACCTCGTTGAGACTTCT-GGCGGTGAATT 556
Query 536  TTTGGTGT-TAGGCTTTGCCTTAAAAACAACAAACAAGTTTGACCTCAAATCAGGTAGG 594
Sbjct 557  TTTGGTATATTTGCTTTGCCTTACAAAACAACAAACAAGTTTGACCTCAAATCAGGTAGG 616
Query 595  ATTACCCGCTGAACTTAAGCATATCAATAAGCGGAGGA 632
Sbjct 617  ATTACCCGCTGAACTTAAGCATATCAATAAGCGGAGGA 654

```

>gb|AY227905.1| *Candida* sp. BG02-4-1-3-1 18S ribosomal RNA gene, partial sequence; internal transcribed spacer 1, 5.8S ribosomal RNA gene and internal transcribed spacer 2, complete sequence; and 26S ribosomal RNA gene, partial sequence  
Length=611

Score = 863 bits (467), Expect = 0.0  
Identities = 571/619 (92%), Gaps = 16/619 (2%)  
Strand=Plus/Plus

```

Query 1  TCCGTAGGTGAACCTGCGGAAGGATCATTACTGTATTCTAATTGCCAGCGCTTAATTGCG 60
Sbjct 3  TCCGTAGGTGAACCTGCGGAAGGATCATTACAGTATTCTTTTGGCAGCGCTTAAGTGGC 62
Query 61  CGGCGATTAAACCTTACACACAATGTTTTCTTTATTAGAACTATTGCTTTGGCT-TGG 119
Sbjct 63  CGGCGAAAAAACCTTACACACAGTG-TTTTCTTTATTAGAACTATTGCTTTGG-TCTGG 120
Query 120  CTAAGAAATTAGTCGGGCCAGAGGTTTACACAACTTCAATTTTTAATTGAATTGTTA-T 178
Sbjct 121  CTCAGAAATGAGTTGGGCCAGAGGTTTAC-CAAACCTCAA-TTTT-ATTGAATTGTTATT 177
Query 179  TTAATACTTTGTCAATTTGTTGATTAAATTCAAACAATCTTCAAACTTTCAACAACGGA 238
Sbjct 178  TTATTAATTTGTCAATTTGTTGATTAAATTCAA- AATCTTCAAACTTTCAACAACGGA 236
Query 239  TCTCTTGGTTCTCGCATCGATGAAGAACGCAGCGAAATGCGATAAGTAATATGAATTGCA 298
Sbjct 237  TCTCTTGGTTCTCGCATCGATGAAGAACGCAGCGAAATGCGATAAGTAATATGAATTGCA 296
Query 299  GATTTTCGTGAATCATCGAATCTTTGAACGCACATTGCGCCCTCTGGTATTCCAGAGGGC 358
Sbjct 297  GATTTTCGTGAATCATCGAATCTTTGAACGCACATTGCGCCCTTTGGTATTCCAAAGGGC 356
Query 359  ATGCCTGTTTGAGCGTCATTTCTCTCTCAAACCCTGGGTTTGGTATTGAGTGATACTCT 418

```



```

Query 536 TTTGGTGT-TAGGCTTTGCCTTAAAAACAACAACAAGTTTGACCTCAAATCAGGTAGG 594
          ||||| | | ||||||||||| |||||||||||||||||||||||||||||||||||
Sbjct 533 TTTGGTATATTGGCTTTGCCTTACAAAACAACAACAAGTTTGACCTCAAATCAGGTAGG 592

Query 595 ATTACCCGCTGAACTTAAG 613
          |||||||||||||||
Sbjct 593 ATTACCCGCTGAACTTAAG 611

```

>gb|AY227903.1| Candida sp. BG02-7-16-1 18S ribosomal RNA gene, partial sequence; internal transcribed spacer 1, 5.8S ribosomal RNA gene and internal transcribed spacer 2, complete sequence; and 26S ribosomal RNA gene, partial sequence  
Length=611

Score = 863 bits (467), Expect = 0.0  
Identities = 571/619 (92%), Gaps = 16/619 (2%)  
Strand=Plus/Plus

```

Query 1 TCCGTAGGTGAACCTGCGGAAGGATCATTACTGTATTCTAATTGCCAGCGCTTAATTGCG 60
          ||||||||||||||||||||||||||||||||||| ||||| ||||||||||||||| |||||
Sbjct 3 TCCGTAGGTGAACCTGCGGAAGGATCATTACAGTATTCTTTTTGCCAGCGCTTAAGTGGC 62

Query 61 CGGCGATTAAACCTTACACACAATGTTTTCTTTATTAGAAACTATTGCTTTGGCT-TGG 119
          ||||| ||||||||||||||| || ||||||||||||||||||||||||||||| | |||
Sbjct 63 CGGCGAAAAAACCTTACACACAGTG-TTTTCTTTATTAGAAACTATTGCTTTGG-TCTGG 120

Query 120 CTAAGAAATTAGTCGGGCCAGAGGTTTACACAACTTCAATTTTTAATTGAATTGTTA-T 178
          || ||||||| || ||||||||||||||| ||||||||||| ||||| ||||||||| |
Sbjct 121 CTCAGAAATGAGTTGGGCCAGAGGTTTAC-CAAACCTCAA-TTTT-ATTGAATTGTTATT 177

Query 179 TTAATACTTTGTCAATTTGTTGATTAAATTCAAACAATCTTCAAACTTTCAACAACGGA 238
          ||| || ||||||||||||||| ||||||||||| ||||||||||| ||||||||| |||
Sbjct 178 TTATTAATTTGTCAATTTGTTGATTAAATTCAAA-AATCTTCAAACTTTCAACAACGGA 236

Query 239 TCTCTTGGTTCTCGCATCGATGAAGAACGCAGCGAAATGCGATAAGTAATATGAATTGCA 298
          ||||||||||||||||||||||||||||||||||| ||||||||||| ||||||||| |||
Sbjct 237 TCTCTTGGTTCTCGCATCGATGAAGAACGCAGCGAAATGCGATAAGTAATATGAATTGCA 296

Query 299 GATTTTTCGTGAATCATCGAATCTTTGAACGCACATTGCGCCCTCTGGTATTCCAGAGGGC 358
          ||||||||||||||||||||||||||||||||||| ||||||||||| ||||||||| |||
Sbjct 297 GATTTTTCGTGAATCATCGAATCTTTGAACGCACATTGCGCCCTTTGGTATTCCAAAGGGC 356

Query 359 ATGCCTGTTTGAGCGTCATTTCTCTCTCAAACCCTGGGTTTGGTATTGAGTGATACTCT 418
          ||||||||||||||||||||||||||||||||||| ||||||||||| ||||||||| |||
Sbjct 357 ATGCCTGTTTGAGCGTCATTTCTCTCTCAAACCCTCGGTTTGGTATTGAGTGATACTCT 416

Query 419 TAGTCGAACTAGGCGTTTGCTTGAAATTTATTGGCATGAGTGACGCTGAGA-AGTGCATT 477
          ||||||||||||||||||||||||||||||||||| ||||||||| ||||| ||||| |
Sbjct 417 TAGTCGAACTAGGCGTTTGCTTGAAAAGTATTGGCACGAGTGGTACTAA-ATAGTAC-TG 474

Query 478 -CAGGAA-ATATCAATGTATTAGGTTTATCCAACCTCGTTGACAATCTTGGTTGTGAATT 535
          || | || ||||||||||||||| ||||||||||| ||||||||| ||||| |||
Sbjct 475 ACAG-AATATTTCAATGTATTAGGTTTATCCAACCTCGTTGAGACTTCT-GGCGGTGAATT 532

Query 536 TTTGGTGT-TAGGCTTTGCCTTAAAAACAACAACAAGTTTGACCTCAAATCAGGTAGG 594
          ||||| | | ||||||||||| |||||||||||||||||||||||||||||||||||
Sbjct 533 TTTGGTATATTGGCTTTGCCTTACAAAACAACAACAAGTTTGACCTCAAATCAGGTAGG 592

Query 595 ATTACCCGCTGAACTTAAG 613
          |||||||||||||||
Sbjct 593 ATTACCCGCTGAACTTAAG 611

```

>gb|AY227902.1| Pichia sp. KS-42-W2 18S ribosomal RNA gene, partial sequence; internal transcribed spacer 1, 5.8S ribosomal RNA gene and internal transcribed spacer 2, complete sequence; and 26S ribosomal RNA gene, partial sequence  
Length=611

Score = 863 bits (467), Expect = 0.0  
Identities = 571/619 (92%), Gaps = 16/619 (2%)  
Strand=Plus/Plus

```
Query 1 TCCGTAGGTGAACCTGCGGAAGGATCATTACTGTATTCTAATTGCCAGCGCTTAATTGCG 60
      |||
Sbjct 3 TCCGTAGGTGAACCTGCGGAAGGATCATTACAGTATTCTTTTGGCCAGCGCTTAAGTGCG 62

Query 61 CGGCGATTAAACCTTACACACAATGTTTTCTTTATTAGAAACTATTGCTTTGGCT-TGG 119
      |||
Sbjct 63 CGGCGAAAAAACCTTACACACAGTG-TTTTCTTTATTAGAAACTATTGCTTTGG-TCTGG 120

Query 120 CTAAGAAATTAGTCGGGCCAGAGGTTTACACAACTTCAATTTTAATTGAATTGTTA-T 178
      |||
Sbjct 121 CTCAGAAATGAGTTGGGCCAGAGGTTTAC-CAACTTCAA-TTTT-ATTGAATTGTTATT 177

Query 179 TTAATACTTTGTCAATTTGTTGATTAAATTCAAACAATCTTCAAACTTTCAACAACGGA 238
      |||
Sbjct 178 TTATTATTTTGTCAATTTGTTGATTAAATTCAA-AATCTTCAAACTTTCAACAACGGA 236

Query 239 TCTCTTGGTTCTCGCATCGATGAAGAACGCAGCGAAATGCGATAAGTAATATGAATTGCA 298
      |||
Sbjct 237 TCTCTTGGTTCTCGCATCGATGAAGAACGCAGCGAAATGCGATAAGTAATATGAATTGCA 296

Query 299 GATTTTCGTGAATCATCGAATCTTTGAACGCACATTGCGCCCTCTGGTATTCCAGAGGGC 358
      |||
Sbjct 297 GATTTTCGTGAATCATCGAATCTTTGAACGCACATTGCGCCCTTTGGTATTCCAAAGGGC 356

Query 359 ATGCCTGTTTGGAGCGTCATTTCTCTCTCAAACCCTGGGTTTGGTATTGAGTGATACTCT 418
      |||
Sbjct 357 ATGCCTGTTTGGAGCGTCATTTCTCTCTCAAACCCTGGGTTTGGTATTGAGTGATACTCT 416

Query 419 TAGTCGAACTAGGCGTTTGCTTGAAATTTATTGGCATGAGTGACGCTGAGA-AGTGCATT 477
      |||
Sbjct 417 TAGTCGAACTAGGCGTTTGCTTGAAAAGTATTGGCAGGAGTGGTACTAA-ATAGTAC-TG 474

Query 478 -CAGGAA-ATATCAATGTATTAGGTTTATCCAACCTCGTTGACAATCTTGGTTGTGAATT 535
      |||
Sbjct 475 ACAG-AATATTTCAATGTATTAGGTTTATCCAACCTCGTTGAGACTTCT-GGCGGTGAATT 532

Query 536 TTTGGTGT-TAGGCTTTGCCTTAAAAACAACAACAAGTTTGACCTCAAATCAGGTAGG 594
      |||
Sbjct 533 TTTGGTATATTGGCTTTGCCTTACAAAACAACAACAAGTTTGACCTCAAATCAGGTAGG 592

Query 595 ATTACCCGCTGAACTTAAG 613
      |||
Sbjct 593 ATTACCCGCTGAACTTAAG 611
```

>gb|AY227901.1| Candida sp. BG01-5-4-2-1 18S ribosomal RNA gene, partial sequence; internal transcribed spacer 1, 5.8S ribosomal RNA gene and internal transcribed spacer 2, complete sequence; and 26S ribosomal RNA gene, partial sequence  
Length=611

Score = 863 bits (467), Expect = 0.0  
Identities = 571/619 (92%), Gaps = 16/619 (2%)

Strand=Plus/Plus

```
Query 1 TCCGTAGGTGAACCTGCGGAAGGATCATTACTGTATTCTAATTGCCAGCGCTTAATTGCG 60
|||||
Sbjct 3 TCCGTAGGTGAACCTGCGGAAGGATCATTACAGTATTCTTTTGGCCAGCGCTTAAGTGGC 62

Query 61 CGGCGATTAAACCTTACACACAATGTTTTCTTTATTAGAACTATTGCTTTGGCT-TGG 119
|||||
Sbjct 63 CGGCGAAAAAACCTTACACACAGTG-TTTTCTTTATTAGAACTATTGCTTTGG-TCTGG 120

Query 120 CTAAGAAATTAGTCGGGCCAGAGGTTTACACAACTTCAATTTTAAATTGAATTGTTA-T 178
||
Sbjct 121 CTCAGAAATGAGTTGGGCCAGAGGTTTAC-CAAACCTCAA-TTTT-ATTGAATTGTTATT 177

Query 179 TTAATACTTTGTCAATTTGTTGATTAAATTCAAACAATCTTCAAACCTTCAACAACGGA 238
|||
Sbjct 178 TTATTAATTTGTCAATTTGTTGATTAAATTCAAA-AATCTTCAAACCTTCAACAACGGA 236

Query 239 TCTCTTGGTTCTCGCATCGATGAAGAACGCAGCGAAATGCGATAAGTAATATGAATTGCA 298
|||||
Sbjct 237 TCTCTTGGTTCTCGCATCGATGAAGAACGCAGCGAAATGCGATAAGTAATATGAATTGCA 296

Query 299 GATTTTTCGTGAATCATCGAATCTTTGAACGCACATTGCGCCCTCTGGTATTCCAGAGGGC 358
|||||
Sbjct 297 GATTTTTCGTGAATCATCGAATCTTTGAACGCACATTGCGCCCTTTGGTATTCCAAAGGGC 356

Query 359 ATGCCTGTTTGAGCGTCATTTCTCTCTCAAACCCTGGGTTTGGTATTGAGTGATACTCT 418
|||||
Sbjct 357 ATGCCTGTTTGAGCGTCATTTCTCTCTCAAACCCTCGGGTTTGGTATTGAGTGATACTCT 416

Query 419 TAGTCGAACTAGGCGTTTGCTTGAAATTTATTGGCATGAGTGACGCTGAGA-AGTGCATT 477
|||||
Sbjct 417 TAGTCGAACTAGGCGTTTGCTTGAAAAGTATTGGCACGAGTGGTACTAA-ATAGTAC-TG 474

Query 478 -CAGGAA-ATATCAATGTATTAGGTTTATCCAACCTCGTTGACAATCTTGTTGTGAATT 535
|||
Sbjct 475 ACAG-AATATTTCAATGTATTAGGTTTATCCAACCTCGTTGAGACTTCT-GGCGGTGAATT 532

Query 536 TTTGGTGT-TAGGCTTTGCCTTAAAAACAACAACAAGTTTGACCTCAAATCAGGTAGG 594
|||||
Sbjct 533 TTTGGTATATTGGCTTTGCCTTACAAAACAACAACAAGTTTGACCTCAAATCAGGTAGG 592

Query 595 ATTACCCGCTGAACTTAAG 613
|||||
Sbjct 593 ATTACCCGCTGAACTTAAG 611
```

>gb|AY227900.1| Candida sp. GA012-1-1 18S ribosomal RNA gene, partial sequence;  
internal transcribed spacer 1, 5.8S ribosomal RNA gene and  
internal transcribed spacer 2, complete sequence; and 26S  
ribosomal RNA gene, partial sequence  
Length=611

Score = 863 bits (467), Expect = 0.0  
Identities = 571/619 (92%), Gaps = 16/619 (2%)  
Strand=Plus/Plus

```
Query 1 TCCGTAGGTGAACCTGCGGAAGGATCATTACTGTATTCTAATTGCCAGCGCTTAATTGCG 60
|||||
Sbjct 3 TCCGTAGGTGAACCTGCGGAAGGATCATTACAGTATTCTTTTGGCCAGCGCTTAAGTGGC 62

Query 61 CGGCGATTAAACCTTACACACAATGTTTTCTTTATTAGAACTATTGCTTTGGCT-TGG 119
|||||
Sbjct 63 CGGCGAAAAAACCTTACACACAGTG-TTTTCTTTATTAGAACTATTGCTTTGG-TCTGG 120
```





```

Query 239 TCTCTTGGTTCTCGCATCGATGAAGAACGCAGCGAAATGCGATAAGTAATATGAATTGCA 298
          |||
Sbjct 237 TCTCTTGGTTCTCGCATCGATGAAGAACGCAGCGAAATGCGATAAGTAATATGAATTGCA 296

Query 299 GATTTTCGTGAATCATCGAATCTTTGAACGCACATTGCGCCCTCTGGTATTCCAGAGGGC 358
          |||
Sbjct 297 GATTTTCGTGAATCATCGAATCTTTGAACGCACATTGCGCCCTTTGGTATTCCAAAGGGC 356

Query 359 ATGCCTGTTTGAGCGTCATTTCTCTCTCAAACCCTTGGGTTTGGTATTGAGTGATACTCT 418
          |||
Sbjct 357 ATGCCTGTTTGAGCGTCATTTCTCTCTCAAACCCTCGGGTTTGGTATTGAGTGATACTCT 416

Query 419 TAGTCGAAGTGGCGTTTGCCTTGAATTTATTGGCATGAGTGACGCTGAGA-AGTGCATT 477
          |||
Sbjct 417 TAGTCGAAGTGGCGTTTGCCTTGAAGTATTGGCACGAGTGGTACTAA-ATAGTAC-TG 474

Query 478 -CAGGAA-ATATCAATGTATTAGGTTTATCCAACCTCGTTGACAATTCTTGGTTGTGAATT 535
          |||
Sbjct 475 ACAG-AATATTTCAATGTATTAGGTTTATCCAACCTCGTTGAGACTTCT-GGCGGTGAATT 532

Query 536 TTTGGTGT-TAGGCTTTGCCTTAAAAACAACAACAAGTTTGACCTCAAATCAGGTAGG 594
          |||
Sbjct 533 TTTGGTATATTGGCTTTGCCTTACAAAACAACAACAAGTTTGACCTCAAATCAGGTAGG 592

Query 595 ATTACCCGCTGAACTTAAG 613
          |||
Sbjct 593 ATTACCCGCTGAACTTAAG 611

```

>gb|AY227906.1| *Candida* sp. BG02-7-14-003-1-1 18S ribosomal RNA gene, partial sequence; internal transcribed spacer 1, 5.8S ribosomal RNA gene and internal transcribed spacer 2, complete sequence; and 26S ribosomal RNA gene, partial sequence  
Length=611

Score = 857 bits (464), Expect = 0.0  
Identities = 570/619 (92%), Gaps = 16/619 (2%)  
Strand=Plus/Plus

```

Query 1 TCCGTAGGTGAACCTGCGGAAGGATCATTACTGTATTCTAATTGCCAGCGCTTAATTGCG 60
          |||
Sbjct 3 TCCGTAGGTGAACCTGCGGAAGGATCATTACAGTATTCTTTTGGCAGCGCTTAAGTGGC 62

Query 61 CGGCGATTAAACCTTACACACAATGTTTTCTTTATTAGAACTATTGCTTTGGCT-TGG 119
          |||
Sbjct 63 CGGCGAAAAAACCTTACACACAGTG-TTTTCTTTATTAGAACTATTGCTTTGG-TCTGG 120

Query 120 CTAAGAAATTAGTCGGGCCAGAGGTTTACACAACTTCAATTTTAAATTGAATTGTTA-T 178
          |||
Sbjct 121 CTCAGAAATGAGTTGGGCCAGAGGTTTAC-TAACTTCAA-TTTT-ATTGAATTGTTATT 177

Query 179 TTAATACTTTGTCAATTTGTTGATTAAATTCAAACAATCTTCAAACTTTCAACAACGGA 238
          |||
Sbjct 178 TTATTAATTTGTCAATTTGTTGATTAAATTCAA- AATCTTCAAACTTTCAACAACGGA 236

Query 239 TCTCTTGGTTCTCGCATCGATGAAGAACGCAGCGAAATGCGATAAGTAATATGAATTGCA 298
          |||
Sbjct 237 TCTCTTGGTTCTCGCATCGATGAAGAACGCAGCGAAATGCGATAAGTAATATGAATTGCA 296

Query 299 GATTTTCGTGAATCATCGAATCTTTGAACGCACATTGCGCCCTCTGGTATTCCAGAGGGC 358
          |||
Sbjct 297 GATTTTCGTGAATCATCGAATCTTTGAACGCACATTGCGCCCTTTGGTATTCCAAAGGGC 356

Query 359 ATGCCTGTTTGAGCGTCATTTCTCTCTCAAACCCTTGGGTTTGGTATTGAGTGATACTCT 418

```

```

Sbjct 357  |||||
ATGCCTGTTTGAGCGTCATTTCTCTCTCAAACCCCTCGGGTTTGGTATTGAGTGATACTCT 416
Query 419  TAGTCGAACTAGGCGTTTGCTTGAAATTTATTGGCATGAGTGACGCTGAGA-AGTGCATT 477
Sbjct 417  |||||
TAGTCGAACTAGGCGTTTGCTTGAAAAGTATTGGCAGAGTGGTACTAA-ATAGTAC-TG 474
Query 478  -CAGGAA-ATATCAATGTATTAGGTTTATCCAACCTCGTTGACAATTCTTGTTGTGAATT 535
Sbjct 475  |||||
ACAG-AATATTTCAATGTATTAGGTTTATCCAACCTCGTTGAGACTTCT-GGCGGTGAATT 532
Query 536  TTTGGTGT-TAGGCTTTGCCTTAAAAACAACAAACAAGTTTGACCTCAAATCAGGTAGG 594
Sbjct 533  |||||
TTTGGTATATTGGCTTTGCCTTACAAAACAACAAACAAGTTTGACCTCAAATCAGGTAGG 592
Query 595  ATTACCCGCTGAACTTAAG 613
Sbjct 593  |||||
ATTACCCGCTGAACTTAAG 611

```

>gb|GU256745.1| *Pichia stipitis* strain ATCC 62970 18S ribosomal RNA gene, partial sequence; internal transcribed spacer 1, 5.8S ribosomal RNA gene, and internal transcribed spacer 2, complete sequence; and 26S ribosomal RNA gene, partial sequence  
Length=601

Score = 848 bits (459), Expect = 0.0  
Identities = 563/611 (92%), Gaps = 16/611 (2%)  
Strand=Plus/Plus

```

Query 15  TGCGGAAGGATCATTACTGTATTCTAATTGCCAGCGCTTAATTGCGCGGCGATTAAACCT 74
Sbjct 1  |||||
TGCGGAAGGATCATTACAGTATTCTTTTTGCCAGCGCTTAACTGCGCGGCGAAAAACCT 60
Query 75  TACACACAATGTTTTCTTTATTAGAAACTATTGCTTTGGCT-TGGCTAAGAAATTAGTC 133
Sbjct 61  |||||
TACACACAGTG-TTTTCTTTATTAGAAACTATTGCTTTGG-TCTGGCTCAGAAATGAGTT 118
Query 134  GGGCCAGAGGTTTACACAACTTCAATTTTAAATTGAATTGTTA-TTTAATACTTTGTCA 192
Sbjct 119  |||||
GGGCCAGAGGTTTAC-CAAACCTCAA-TTTT-ATTGAATTGTTATTTATTAATTTGTCA 175
Query 193  ATTTGTTGATTAAATTCAAACAATCTTCAAACCTTCAACAACGGATCTCTTGTTCTCG 252
Sbjct 176  |||||
ATTTGTTGATTAAATTCAA- AATCTTCAAACCTTCAACAACGGATCTCTTGTTCTCG 234
Query 253  CATCGATGAAGAACGCAGCGAAATGCGATAAGTAATATGAATTGCAGATTTTCGTGAATC 312
Sbjct 235  |||||
CATCGATGAAGAACGCAGCGAAATGCGATAAGTAATATGAATTGCAGATTTTCGTGAATC 294
Query 313  ATCGAATCTTTGAACGCACATTGCGCCCTCTGGTATTCCAGAGGGCATGCCTGTTTGAGC 372
Sbjct 295  |||||
ATCGAATCTTTGAACGCACATTGCGCCCTTTGGTATTCCAAAGGGCATGCCTGTTTGAGC 354
Query 373  GTCATTTCTCTCTCAAACCCCTTGGGTTTGGTATTGAGTGATACTCTTAGTCGAACTAGGC 432
Sbjct 355  |||||
GTCATTTCTCTCTCAAACCCCTCGGGTTTGGTATTGAGTGATACTCTTAGTCGAACTAGGC 414
Query 433  GTTTGCTTGAAATTTATTGGCATGAGTGACGCTGAGA-AGTGCATT-CAGGAA-ATATCA 489
Sbjct 415  |||||
GTTTGCTTGAAAAGTATTGGCAGAGTGGTACTAA-ATAGTAC-TGACAG-AATATTTCA 471
Query 490  ATGTATTAGGTTTATCCAACCTCGTTGACAATTCTTGTTGTGAATTTTGGTGT-TAGGC 548
Sbjct 471  |||||
ATGTATTAGGTTTATCCAACCTCGTTGACAATTCTTGTTGTGAATTTTGGTGT-TAGGC 524

```

```

Sbjct 472 ATGTATTAGGTTTATCCAACCTCGTTGAGACTTCT-GGCGGTGAATTTTTGGTATATTGGC 530
Query 549 TTTGCCTTAAAAACAACAAACAAGTTTGACCTCAAATCAGGTAGGATTACCCGCTGAAC 608
      |||
Sbjct 531 TTTGCCTTACAAAACAACAAACAAGTTTGACCTCAAATCAGGTAGGATTACCCGCTGAAC 590
Query 609 TTAAGCATATC 619
      |||
Sbjct 591 TTAAGCATATC 601

```

>emb|FM178314.1| *Candida coipomoensis* 18S rRNA gene (partial), ITS1, 5.8S rRNA gene, ITS2 and 28S rRNA gene (partial), strain WM 07.91  
Length=640

Score = 848 bits (459), Expect = 0.0  
Identities = 584/641 (91%), Gaps = 21/641 (3%)  
Strand=Plus/Plus

```

Query 1 TCCGTAGGTGAACCTGCGGAAGGATCATTACTGTATT-CTAATTGCCAGCGCTTAATTGC 59
      |||
Sbjct 11 TCCGTAGGTGAACCTGCGGAAGGATCATTACAGTATTAGT-TTTACCTGCGCTTAATTGC 69
Query 60 GCGGCGATTAAACCTTACACACAATGTTTTCTTTATTAGAACTATTGCTTTGGCTTGG 119
      |||
Sbjct 70 GCGGTAAACAAATCTTACACACAGTGTTTTTCTTTATTAGAACTTTTGGCTTTGGTTTGG 129
Query 120 CTAAGAAATTAGTCGGGCCAGAGGTTTACACAACTTCAATTTTTAATTGAATTG-TTAT 178
      |||
Sbjct 130 CTTAGAAATAAGTTGGGCCAGAGGTTT--A-TAACTTCAATTTTTAATTGAATTGTTTAT 186
Query 179 TTA-ATACTTTGTCAATTTGTTGATTAAATTCAAACAATCTTCAAACTTTCAACAACGG 237
      |||
Sbjct 187 TTATTTA-ATTGTCAATTTGTTGATTAAATTTCAA- AATCTTCAAACTTTCAACAACGG 244
Query 238 ATCTCTTGGTTCTCGCATCGATGAAGAACGCAGCGAAATGCGATAAGTAATATGAATTGC 297
      |||
Sbjct 245 ATCTCTTGGTTCTCGCATCGATGAAGAACGCAGCGAAATGCGATAAGTAATATGAATTGC 304
Query 298 AGATTTTCGTGAATCATCGAATCTTTGAACGCACATTGCGCCCTTGGTATTCCAGAGGG 357
      |||
Sbjct 305 AGATTTTCGTGAATCATCGAATCTTTGAACGCACATTGCGCCCTTGGTATTCCAAAGGG 364
Query 358 CATGCCTGTTTGAGCGTCATTTCTCTCTCAAACCCTT-GGGTTTGGTATTGAGTGATACT 416
      |||
Sbjct 365 CATGCCTGTTTGAGCGTCATTTCTCTCTCAAACC-TTCGGGTTTGGTTTTGAGTGATACT 423
Query 417 CTTAGTCGAACTAGGCGTTTGCTTGAAAATTTATTGGCATGAGT-G-ACGCTGAGA-AGTG 473
      |||
Sbjct 424 CTTAGTCGAACTAGGCGTTTGCTTGAAAAGTATTGGCACGAGTAGTAC--TAA-ATAGTG 480
Query 474 CATTACAGGAA-ATAT-CAATGTATTAGGTTTATCCAACCTCGTTGACAATCTTGGTTGTG 531
      |||
Sbjct 481 CTTTCAGGAACATTTTCAATGTATTAGGTTTATCCAACCTCGTTGAGAATCCCGCTAGTG 540
Query 532 AATTTTTGGTGT-TAGGCTTTGCCTTAAAAACAACAAACAAGTTTGACCTCAAATCAGG 590
      |||
Sbjct 541 AATTTTTGGTATAT-GGCTTTGCCTTACAAAACAACAAACAAGTTTGACCTCAAATCAGG 599
Query 591 TAGGATTACCCGCTGAACTTAAGCATATCAATAAGCGGAGG 631
      |||
Sbjct 600 TAGGATTACCCGCTGAACTTAAGCATATCAATAAGCGGAGG 640

```

>gb|AY325112.1| Candida sp. BG03-3-25-1-5 18S ribosomal RNA gene, partial sequence;  
internal transcribed spacer 1, 5.8S ribosomal RNA gene,  
and internal transcribed spacer 2, complete sequence; and  
26S ribosomal RNA gene, partial sequence  
Length=602

Score = 846 bits (458), Expect = 0.0  
Identities = 562/610 (92%), Gaps = 16/610 (2%)  
Strand=Plus/Plus

```
Query 1 TCCGTAGGTGAACCTGCGGAAGGATCATTACTGTATTCTAATTGCCAGCGCTTAATTGCG 60
      |||
Sbjct 3 TCCGTAGGTGAACCTGCGGAAGGATCATTACAGTATTCTTTTGGCCAGCGCTTAAGTGGC 62

Query 61 CGGCGATTAAACCTTACACACAATGTTTTCTTTATTAGAACTATTGCTTTGGCT-TGG 119
      |||
Sbjct 63 CGGCGAAAAAACCTTACACACAGTG-TTTTCTTTATTAGAACTATTGCTTTGG-TCTGG 120

Query 120 CTAAGAAATTAGTCGGGCCAGAGGTTTACACAACTTCAATTTTAATTGAATTGTTA-T 178
      |||
Sbjct 121 CTCAGAAATGAGTTGGGCCAGAGGTTTAC-CAAACCTCAA-TTTT-ATTGAATTGTTATT 177

Query 179 TTAATACTTTGTCAATTTGTTGATTAAATTCAAACAATCTTCAAACTTTCAACAACGGA 238
      |||
Sbjct 178 TTATTAATTTGTCAATTTGTTGATTAAATTCAA- AATCTTCAAACTTTCAACAACGGA 236

Query 239 TCTCTTGGTTCTCGCATCGATGAAGAACGCAGCGAAATGCGATAAGTAATATGAATTGCA 298
      |||
Sbjct 237 TCTCTTGGTTCTCGCATCGATGAAGAACGCAGCGAAATGCGATAAGTAATATGAATTGCA 296

Query 299 GATTTTTCGTGAATCATCGAATCTTTGAACGCACATTGCGCCCTCTGGTATTCCAGAGGGC 358
      |||
Sbjct 297 GATTTTTCGTGAATCATCGAATCTTTGAACGCACATTGCGCCCTTTGGTATTCCAAAGGGC 356

Query 359 ATGCCTGTTTGAAGCGTCATTTCTCTCTCAAACCCTGGGTTTGGTATTGAGTGATACTCT 418
      |||
Sbjct 357 ATGCCTGTTTGAAGCGTCATTTCTCTCTCAAACCCTGGGTTTGGTATTGAGTGATACTCT 416

Query 419 TAGTCGAACTAGGCGTTTGCCTTAAAATTTATTGGCATGAGTGACGCTGAGA-AGTGCATT 477
      |||
Sbjct 417 TAGTCGAACTAGGCGTTTGCCTTAAAAGTATTGGCACGAGTGGTACTAA-ATAGTAC-TG 474

Query 478 -CAGGAA-ATATCAATGTATTAGGTTTATCCAACCTCGTTGACAATCTTGGTTGTGAATT 535
      |||
Sbjct 475 ACAG-AATATTTCAATGTATTAGGTTTATCCAACCTCGTTGAGACTTCT-GGCGGTGAATT 532

Query 536 TTTGGTGT-TAGGCTTTGCCTTAAAAACAACAACAAGTTTGACCTCAAATCAGGTAGG 594
      |||
Sbjct 533 TTTGGTATATTGGCTTTGCCTTACAAAACAACAACAAGTTTGACCTCAAATCAGGTAGG 592

Query 595 ATTACCCGCT 604
      |||
Sbjct 593 ATTACCCGCT 602
```

>gb|AY325111.1| Candida sp. BG03-3-25-1-3 18S ribosomal RNA gene, partial sequence;  
internal transcribed spacer 1, 5.8S ribosomal RNA gene,  
and internal transcribed spacer 2, complete sequence; and  
26S ribosomal RNA gene, partial sequence  
Length=602

Score = 846 bits (458), Expect = 0.0  
Identities = 562/610 (92%), Gaps = 16/610 (2%)  
Strand=Plus/Plus

```

Query 1 TCCGTAGGTGAACCTGCGGAAGGATCATTACTGTATTCTAATTGCCAGCGCTTAATTGCG 60
      |||
Sbjct 3 TCCGTAGGTGAACCTGCGGAAGGATCATTACAGTATTCTTTTGGCCAGCGCTTAAGTGGC 62

Query 61 CGGCGATTAAACCTTACACACAATGTTTTCTTTATTAGAAACTATTGCTTTGGCT-TGG 119
      |||
Sbjct 63 CGGCGAAAAAACCTTACACACAGTG-TTTTCTTTATTAGAAACTATTGCTTTGG-TCTGG 120

Query 120 CTAAGAAATTAGTCGGGCCAGAGGTTTACACAACTTCAATTTTAAATTGAATTGTTA-T 178
      ||
Sbjct 121 CTCAGAAATGAGTTGGGCCAGAGGTTTAC-CAAACCTCAA-TTTT-ATTGAATTGTTATT 177

Query 179 TTAATACTTTGTCAATTTGTTGATTAAATTCAAACAATCTTCAAACTTTCAACAACGGA 238
      |||
Sbjct 178 TTATTAATTTGTCAATTTGTTGATTAAATTCAAA-AATCTTCAAACTTTCAACAACGGA 236

Query 239 TCTCTTGGTTCTCGCATCGATGAAGAACGCAGCGAAATGCGATAAGTAATATGAATTGCA 298
      |||
Sbjct 237 TCTCTTGGTTCTCGCATCGATGAAGAACGCAGCGAAATGCGATAAGTAATATGAATTGCA 296

Query 299 GATTTTTCGTGAATCATCGAATCTTTGAACGCACATTGCGCCCTCTGGTATTCCAGAGGGC 358
      |||
Sbjct 297 GATTTTTCGTGAATCATCGAATCTTTGAACGCACATTGCGCCCTTTGGTATTCCAAAGGGC 356

Query 359 ATGCCTGTTTGGAGCGTCATTTCTCTCTCAAACCCTGGGTTTGGTATTGAGTGATACTCT 418
      |||
Sbjct 357 ATGCCTGTTTGGAGCGTCATTTCTCTCTCAAACCCTCGGGTTTGGTATTGAGTGATACTCT 416

Query 419 TAGTCGAACTAGGCGTTTGCTTGAAATTTATTGGCATGAGTGACGCTGAGA-AGTGCATT 477
      |||
Sbjct 417 TAGTCGAACTAGGCGTTTGCTTGAAAAGTATTGGCAGGAGTGGTACTAA-ATAGTAC-TG 474

Query 478 -CAGGAA-ATATCAATGTATTAGGTTTATCCAACCTCGTTGACAATTCTTGGTTGTGAATT 535
      |||
Sbjct 475 ACAG-AATATTTCAATGTATTAGGTTTATCCAACCTCGTTGAGACTTCT-GGCGGTGAATT 532

Query 536 TTTGGTGT-TAGGCTTTGCCTTAAAAACAACAACAAGTTTGACCTCAAATCAGGTAGG 594
      |||
Sbjct 533 TTTGGTATATTGGCTTTGCCTTACAAAACAACAACAAGTTTGACCTCAAATCAGGTAGG 592

Query 595 ATTACCCGCT 604
      |||
Sbjct 593 ATTACCCGCT 602

```

>emb|FM178352.1| *Candida ergastensis* 18S rRNA gene (partial), ITS1, 5.8S rRNA gene, ITS2 and 28S rRNA gene (partial), strain WM 07.29  
Length=644

Score = 845 bits (457), Expect = 0.0  
Identities = 589/647 (91%), Gaps = 31/647 (4%)  
Strand=Plus/Plus

```

Query 1 TCCGTAGGTGAACCTGCGGAAGGATCATTACTGTATT-CTAATTGCCAGCGCTTAATTGC 59
      |||
Sbjct 11 TCCGTAGGTGAACCTGCGGAAGGATCATTATTGTATTAGT-TTTACCTGCGCTTAATTGC 69

Query 60 GCGG-CGATTAAACCTTACACACAATGTTTTCTTTATTAGAAACTATTGCTTTGGCT-T 117
      |||
Sbjct 70 GCGGTAGA-CAAA-CTTACACACAGTGTTTTTCTTTATT-GAAACTATTGCTTTGG-TCT 125

Query 118 GGCTAAGAAATTAGTC-GGGCCAGAGGTTTACACAACTTCAATTTTAAATTGAATTG-T 175
      |||

```

```

Sbjct 126 GACTTAGAAATAAG-CTGGGCCAGAGGTTT--A-AACTTCAATTTTAAATTGAATTGTT 181
Query 176 TATTTA-ATACTTTGTCAATTTGTTGATTAAATTCAAACAATCTTCAAACTTTCAACAA 234
      |||||  ||  |||||||||||||||||||||||||||||||||||||||||||||||
Sbjct 182 TATTTATTTA-ATTGTCAATTTGTTGATTAAATTCAA- AATCTTCAAACTTTCAACAA 239
Query 235 CGGATCTCTTGGTTCTCGCATCGATGAAGAACGCAGCGAAATGCGATAAGTAATATGAAT 294
      |||||  |||||  |||||  |||||  |||||  |||||  |||||  |||||  |||||  |||||
Sbjct 240 CGGATCTCTTGGTTCTCGCATCGATGAAGAACGCAGCGAAATGCGATAAGTAATATGAAT 299
Query 295 TGCAGATTTTTCGTGAATCATCGAATCTTTGAACGCACATTGCGCCCTCTGGTATTCCAGA 354
      |||||  |||||  |||||  |||||  |||||  |||||  |||||  |||||  |||||  |||||
Sbjct 300 TGCAGATTTTTCGTGAATCATCGAATCTTTGAACGCACATTGCGCCCTTTGGTATTCCAAA 359
Query 355 GGGCATGCCTGTTTGAGCGTCATTTCTCTCTCAAACCCTT-GGGTTTGGTATTGAGTGAT 413
      |||||  |||||  |||||  |||||  |||||  |||||  |||||  |||||  |||||  |||||
Sbjct 360 GGGCATGCCTGTTTGAGCGTCATTTCTCTCTCAAACC-TTCGGGTTTGGTATTGAGTGAT 418
Query 414 ACTCTTAGTCGAACTAGGCGTTTGCTTGAAATTTATTGGCATGAGT-G-ACGCTGAGA-A 470
      |||||  |||||  |||||  |||||  |||||  |||||  |||||  |||||  |||||  |||||
Sbjct 419 ACTCTTAGTCGAACTAGGCGTTTGCTTGAAAAGTATCGGCATGAGTCGTAC--TGA-ATA 475
Query 471 GTGCATTTCAGGAA-ATAT-CAATGTATTAGGTTTATCCAACCTCGTTGACAATTCTTGGTT 528
      |||||  |||||  |||||  |||||  |||||  |||||  |||||  |||||  |||||  |||||
Sbjct 476 GTGCTTTTAGGAACATTTTCAATGTATTAGGTTTATCCAACCTCGTTGAGAATTCTTA-TT 534
Query 529 -GTGAATTTTGGTGT-TA-GGCTTTGCCTTAAAAACAACAAACAAGTTTGACCTCAAA 585
      |||||  |||||  |||||  |||||  |||||  |||||  |||||  |||||  |||||  |||||
Sbjct 535 AGTGAATTTTGGTATATTGGCTTTGCCTTACAAACAACAAACAAGTTTGACCTCAAA 594
Query 586 TCAGGTAGGATTACCCGCTGAACTTAAGCATATCAATAAGCGGAGGA 632
      |||||  |||||  |||||  |||||  |||||  |||||  |||||  |||||  |||||  |||||
Sbjct 595 TCAGGTAGGACTACCCGCTGAACTTAAGCATATCAATAAGCGGAGGA 641

```

>dbj|AB513337.1| Candida sp. MT-LUC0013 genes for 18S rRNA, ITS1, 5.8S rRNA, ITS2, 26S rRNA, partial and complete sequence  
Length=652

Score = 843 bits (456), Expect = 0.0  
Identities = 581/638 (91%), Gaps = 21/638 (3%)  
Strand=Plus/Plus

```

Query 1 TCCGTAGGTGAACCTGCGGAAGGATCATTACTGTATT-CTAATTGCCAGCGCTTAATTGC 59
      |||||  |||||  |||||  |||||  |||||  |||||  |||||  |||||  |||||  |||||
Sbjct 26 TCCGTAGGTGAACCTGCGGAAGGATCATTACAGTATTAGT-TTTACCTGCGCTTAATTGC 84
Query 60 GCGGCGATTAAACCTTACACACAATGTTTTCTTTATTAGAACTATTGCTTTGGCTTGG 119
      |||||  |||||  |||||  |||||  |||||  |||||  |||||  |||||  |||||  |||||
Sbjct 85 GCGGTAAACAAATCTTACACACAGTGTTTTTCTTTATTAGAACTTTTGCTTTGGTTTGG 144
Query 120 CTAAGAAATTAGTCGGGCCAGAGGTTTACACAAACTTCAATTTTAAATTGAATTG-TTAT 178
      |||||  |||||  |||||  |||||  |||||  |||||  |||||  |||||  |||||  |||||
Sbjct 145 CTTAGAAATAAGTTGGGCCAGAGGTTT--A-TAACTTCAATTTTAAATTGAATTGTTTAT 201
Query 179 TTA-ATACTTTGTCAATTTGTTGATTAAATTCAAACAATCTTCAAACTTTCAACAACGG 237
      |||||  |||||  |||||  |||||  |||||  |||||  |||||  |||||  |||||  |||||
Sbjct 202 TTATTTA-ATTGTCAATTTGTTGATTAAATTCAA- AATCTTCAAACTTTCAACAACGG 259
Query 238 ATCTCTTGGTTCTCGCATCGATGAAGAACGCAGCGAAATGCGATAAGTAATATGAATTGC 297
      |||||  |||||  |||||  |||||  |||||  |||||  |||||  |||||  |||||  |||||
Sbjct 260 ATCTCTTGGTTCTCGCATCGATGAAGAACGCAGCGAAATGCGATAAGTAATATGAATTGC 319
Query 298 AGATTTTTCGTGAATCATCGAATCTTTGAACGCACATTGCGCCCTCTGGTATTCCAGAGGG 357

```

```

Sbjct 320 |||...||| AGATTTTCGTGAATCATCGAATCTTTGAACGCACATTGCGCCCTTTGGTATTCCAAAGGG 379
Query 358 CATGCCTGTTTGAGCGTCATTTCTCTCTCAAACCCTT-GGGTTTGGTATTGAGTGATACT 416
Sbjct 380 |||...||| CATGCCTGTTTGAGCGTCATTTCTCTCTCAAACC-TTCGGGTTTGGT...TTCGAGTGATACT 438
Query 417 CTTAGTCGAACTAGGCGTTTGCTTGAAATTTATTGGCATGAGT-G-ACGCTGAGA-AGTG 473
Sbjct 439 |||...||| CTTAGTCGAACTAGGCGTTTGCTTGAAAAGTATTGGCACGAGTAGTAC--TAA-ATAGTG 495
Query 474 CATTTCAGGAA-ATAT-CAATGTATTAGGTTTATCCAACCTCGTTGACAATTCCTGGTTGTG 531
Sbjct 496 |||...||| CTTTCAGGAACATTTTCAATGTATTAGGTTTATCCAACCTCGTTGAGAATTC...CCGCTAGTG 555
Query 532 AATTTTTGGTGT-TAGGCTTTGCCTTAAAAACAACAACAAGTTTGACCTCAAATCAGG 590
Sbjct 556 |||...||| AATTTTTGGTATAT-GGCTTTGCCTTACAAAACAACAACAAGTTTGACCTCAAATCAGG 614
Query 591 TAGGATTACCCGCTGAACTTAAGCATATCAATAAGCGG 628
Sbjct 615 |||...||| TAGGATTACCCGCTGAACTTAAGCATATCAATAAGCGG 652

```

>gb|EF627975.1| *Candida lignicola* strain NBRC 102564 internal transcribed spacer 1, partial sequence; 5.8S ribosomal RNA gene, complete sequence; and internal transcribed spacer 2, partial sequence  
Length=665

Score = 841 bits (455), Expect = 0.0  
Identities = 580/636 (91%), Gaps = 26/636 (4%)  
Strand=Plus/Plus

```

Query 9 TGAACCTGCGGAAGGATCATTACTGTATTCTA--ATTGCCAGCGCTTAATTGCGCGGCG- 65
Sbjct 43 |||...||| TGAACCTGCGGAAGGATCATTACTGT-TT-TAGTTTTACCAGCGCTTAATTGCGCGGTGA 100
Query 66 ATTAAACCTTACACACAATGTTTTCTTTATTAGAACTATTGCTTTGGCTTGGCTAAGA 125
Sbjct 101 |||...||| ACAAATCTTACACACAGTG-TTTTCTTTATTAGAACTATTGCTTTGGTTTGGCTTAGA 159
Query 126 AATTAGTCGGGCCAGAGGTTTACACAACTTCAATTTTAAATTGAATTG-TTATTTAATA 184
Sbjct 160 |||...||| AATAAGTTGGG-CAGAGGTTT--A-TAACTTCAATTTTAAATTGAATTGTTTATTTATTA 215
Query 185 CTTTGTCAATTTGTTGATTAATTTCAAACAATCTTCAAACCTTTCAACAACGGATCTCTT 244
Sbjct 216 |||...||| -ATTGTCAATTTGTTGATTAATTTCAA- AATCTTCAAACCTTTCAACAACGGATCTCTT 273
Query 245 GGTTCCTCGCATCGATGAAGAACGCAGCGAAATGCGATAAGTAATATGAATTGCAGATTTT 304
Sbjct 274 |||...||| GGTTCCTCGCATCGATGAAGAACGCAGCGAAATGCGATAAGTAATATGAATTGCAGATTTT 333
Query 305 CGTGAATCATCGAATCTTTGAACGCACATTGCGCCCTCTGGTATTCCAGAGGGCATGCCT 364
Sbjct 334 |||...||| CGTGAATCATCGAATCTTTGAACGCACATTGCGCCCTTTGGTATTCCAAAGGGCATGCCT 393
Query 365 GTTTGAGCGTCATTTCTCTCTCAAACCCTT-GGGTTTGGTATTGAGTGATACTCTTAGTC 423
Sbjct 394 |||...||| GTTTGAGCGTCATTTCTCTCTCAAACC-TTCGGGTTTGGTATTGAGTGATACTCTTAGTC 452
Query 424 GAACTAGGCGTTTGCTTGAAATTTATTGGCATGAGT-G-ACGCTGAGA-AGTGCATTAG 480
Sbjct 453 |||...||| GAACTAGGCGTTTGCTTGAAAAGTATTGGCACGAGTAGTAC--TAA-ATAGTGCTTTCAG 509

```



```

Query 481 GAA-ATAT-CAATGTATTAGGTTTATCCAACCTCGTTGACAATTCTTGGTTGTGAATTTTT 538
      ||| || | ||||||||||||||||||||||||||||||||||| ||||| | |||||||||||
Sbjct 510 GAACATTTTCAATGTATTAGGTTTATCCAACCTCGTTGAGATTTCTTGCTAGTGAATTTTT 569

Query 539 GGTGT-TAGGCTTTGCCTTAAAAACAACAACAAGTTTGACCTCAAATCAGGTAGGATT 597
      ||| | | ||||||||||||||| ||||||||||||||||||| |||||||||||||||
Sbjct 570 GGTATAT-GGCTTTGCCTTACAAAACAACAACAAGTTTGACCTCAAATCAGGTAGGATT 628

Query 598 ACCCGCTGAACTTAAGCATATCAATAAGC-GGAGGA 632
      ||||||||||||||||||| ||||| |||||
Sbjct 629 ACCCGCTGAACTTAAGCATATCATTAAGCCGGAGGA 664

```

>gb|EU343874.1| *Candida coipomoensis* strain MUCL 29818 18S ribosomal RNA gene, partial sequence; internal transcribed spacer 1, 5.8S ribosomal RNA gene, and internal transcribed spacer 2, complete sequence; and 28S ribosomal RNA gene, partial sequence  
Length=627

Score = 830 bits (449), Expect = 0.0  
Identities = 574/631 (90%), Gaps = 21/631 (3%)  
Strand=Plus/Plus

```

Query 1 TCCGTAGGTGAACCTGCGGAAGGATCATTACTGTATT-CTAATTGCCAGCGCTTAATTGC 59
      ||||||||||||||||||||||||||||||||||| ||||| | || || |||||||||||
Sbjct 8 TCCGTAGGTGAACCTGCGGAAGGATCATTACAGTATTAGT-TTTACCTGCGCTTAATTGC 66

Query 60 GCGGCGATTAAACCTTACACACAATGTTTTCTTTATTAGAAACTATTGCTTTGGCTTGG 119
      |||| | ||| ||||||||||| ||||||||||||||| ||||||||||||| |||||
Sbjct 67 GCGGTAAACAAATCTTACACACAGTGTTTTTCTTTATTAGAAACTTTTGGCTTTGGT 126

Query 120 CTAAGAAATTAGTCGGGCCAGAGGTTTACACAACTTCAATTTTTAATTGAATTG-TTAT 178
      || |||||| ||| ||||||||||| | ||||||||||||||| |||||||||||
Sbjct 127 CTTAGAAATAAGTTGGGCCAGAGGTTT--A-TAACTTCAATTTTTAATTGAATTGTTTAT 183

Query 179 TTA-ATACTTTGTCAATTTGTTGATTAATAATCAAACAATCTTCAAACTTTCAACAACGG 237
      ||| || ||||||||||||||| ||||||||||| ||||||||||||||| |||||||
Sbjct 184 TTATTTA-ATTGTCAATTTGTTGATTAATAATCAA- AATCTTCAAACTTTCAACAACGG 241

Query 238 ATCTCTTGGTTCTCGCATCGATGAAGAACGCAGCGAAATGCGATAAGTAATATGAATTGC 297
      ||||||||||||||||||||||||||||||| ||||||||||||||| |||||||
Sbjct 242 ATCTCTTGGTTCTCGCATCGATGAAGAACGCAGCGAAATGCGATAAGTAATATGAATTGC 301

Query 298 AGATTTTCGTGAATCATCGAATCTTTGAACGCACATTGCGCCCTCTGGTATTCCAGAGGG 357
      ||||||||||||||||||||||||||| ||||||||||||||| |||||||
Sbjct 302 AGATTTTCGTGAATCATCGAATCTTTGAACGCACATTGCGCCCTTTGGTATTCCAAAGGG 361

Query 358 CATGCCTGTTTGAGCGTCATTTCTCTCTCAAACCCTT-GGGTTTGGTATTGAGTGATACT 416
      ||||||||||||||||||||||| ||||||||||| |||||||
Sbjct 362 CATGCCTGTTTGAGCGTCATTTCTCTCTCAAACC-TTCGGGTTTGGTATTGAGTGATACT 420

Query 417 CTTAGTCGAACTAGGCGTTTGCTTGAAAATTTATTGGCATGAGT-G-ACGCTGAGA-AGTG 473
      ||||||||||| ||| ||||||||||| ||||||| ||||| ||| |||
Sbjct 421 CTTAGTCGAACTAGGCGTTTGCTTGAAAAGTATTGGCACGAGTAGTAC--TAA-ATAGTG 477

Query 474 CATTACAGGAA-ATAT-CAATGTATTAGGTTTATCCAACCTCGTTGACAATTCTTGGTTGTG 531
      | ||||||| || | ||||||||||| ||||||| ||||| | | |||
Sbjct 478 CTTTACAGGAACATTTTCAATGTATTAGGTTTATCCAACCTCGTTGAGAATCCCGCTAGTG 537

Query 532 AATTTTTGGTGT-TAGGCTTTGCCTTAAAAACAACAACAAGTTTGACCTCAAATCAGG 590
      ||||||||| | | ||||||||||| ||||||| ||||| |||||
Sbjct 538 AATTTTTGGTATAT-GGCTTTGCCTTACAAAACAACAACAAGTTTGACCTCAAATCAGG 596

```

Query 591 TAGGATTACCCGCTGAACTTAAGCATATCAA 621  
|||||  
Sbjct 597 TAGGATTACCCGCTGAACTTAAGCATATCAA 627

>gb|EU343826.1| Candida ergastensis strain MUCL 30034 18S ribosomal RNA gene, partial sequence; internal transcribed spacer 1, 5.8S ribosomal RNA gene, and internal transcribed spacer 2, complete sequence; and 28S ribosomal RNA gene, partial sequence  
Length=627

Score = 824 bits (446), Expect = 0.0  
Identities = 578/636 (90%), Gaps = 31/636 (4%)  
Strand=Plus/Plus

Query 1 TCCGTAGGTGAACCTGCGGAAGGATCATTACTGTATT-CTAATTGCCAGCGCTTAATTGC 59  
|||||  
Sbjct 8 TCCGTAGGTGAACCTGCGGAAGGATCATTATTGTATTAGT-TTTACCTGCGCTTAATTGC 66

Query 60 GCGG-CGATTAAACCTTACACACAATGTTTTTCTTTATTAGAACTATTGCTTTGGCT-T 117  
|||||  
Sbjct 67 GCGGTAGA-CAAA-CTTACACACAGTGTTTTTCTTTATT-GAAACTATTGCTTTGG-TCT 122

Query 118 GGCTAAGAAATTAGTC-GGGCCAGAGGTTTACACAACTTCAATTTTTAATTGAATTG-T 175  
|||||  
Sbjct 123 GACTTAGAAATAAG-CTGGGCCAGAGGTTT--A-AACTTCAATTTTTAATTGAATTGTT 178

Query 176 TATTTA-ATACTTTGTCAATTTGTTGATTAAATTCAAACAATCTTCAAACTTTCAACAA 234  
|||||  
Sbjct 179 TATTTATTTA-ATTGTCAATTTGTTGATTAAATTCAA-AATCTTCAAACTTTCAACAA 236

Query 235 CGGATCTCTTGGTTCTCGCATCGATGAAGAACGCAGCGAAATGCGATAAGTAATATGAAT 294  
|||||  
Sbjct 237 CGGATCTCTTGGTTCTCGCATCGATGAAGAACGCAGCGAAATGCGATAAGTAATATGAAT 296

Query 295 TGCAGATTTTTCGTGAATCATCGAATCTTTGAACGCACATTGCGCCCTTGGTATTCCAGA 354  
|||||  
Sbjct 297 TGCAGATTTTTCGTGAATCATCGAATCTTTGAACGCACATTGCGCCCTTGGTATTCCAAA 356

Query 355 GGGCATGCCTGTTTGGAGCGTCATTTCTCTCTCAAACCCTT-GGGTTTGGTATTGAGTGAT 413  
|||||  
Sbjct 357 GGGCATGCCTGTTTGGAGCGTCATTTCTCTCTCAAACC-TTCGGGTTTGGTATTGAGTGAT 415

Query 414 ACTCTTAGTCGAACTAGGCGTTTGCTTGAAATTTATTGGCATGAGT-G-ACGCTGAGA-A 470  
|||||  
Sbjct 416 ACTCTTAGTCGAACTAGGCGTTTGCTTGAAAAGTATCGGCATGAGTCGTAC--TGA-ATA 472

Query 471 GTGCATTCAGGAA-ATAT-CAATGTATTAGGTTTATCCAACCTCGTTGACAATTCTTGGTT 528  
|||||  
Sbjct 473 GTGCTTTTAGGAACATTTTCAATGTATTAGGTTTATCCAACCTCGTTGAGAATTCTTA-TT 531

Query 529 -GTGAATTTTGGTGT-TA-GGCTTTGCCTTAAAAACAACAACAAGTTTGACCTCAAA 585  
|||||  
Sbjct 532 AGTGAATTTTGGTATATTTGGCTTTGCCTTACAAAACAACAACAAGTTTGACCTCAAA 591

Query 586 TCAGGTAGGATTACCCGCTGAACTTAAGCATATCAA 621  
|||||  
Sbjct 592 TCAGGTAGGACTACCCGCTGAACTTAAGCATATCAA 627

>gb|GQ458025.1| Debaryomyces hansenii strain MA09-AK 18S ribosomal RNA gene, partial sequence; internal transcribed spacer 1, 5.8S ribosomal RNA gene, and internal transcribed spacer 2, complete sequence; and 28S ribosomal RNA gene, partial sequence

Length=2991

Score = 819 bits (443), Expect = 0.0  
Identities = 588/652 (90%), Gaps = 33/652 (5%)  
Strand=Plus/Plus

```
Query 1 TCCGTAGGTGAACCTGCGGAAGGATCATTACTGTATTCTAATTGCCAGCGCTTAATTGCG 60
      |||
Sbjct 1753 TCCGTAGGTGAACCTGCGGAAGGATCATTACAGTATTCTTTTTGCCAGCGCTTAATTGCG 1812

Query 61 CGGCGATTAAACCTTACACACAATGTTTTTCT-TTATTA-GA-AACTATTGCTTTGGCT- 116
      |||
Sbjct 1813 CGGCGAAAAAACCTTACACACAGTGTTTTT-TGTTATTACAAGAACTTTTGCTTTGG-TC 1870

Query 117 TGG-CTAAGAAATTAG-TCGGGCCAGAGGTTTAC---AC-AACTTCAATTTTTTA-ATTG 169
      |||
Sbjct 1871 TGGACT-AGAAA-TAGTTTGGGCCAGAGGTTTACTGAACTAACTTCAATATTTATATTG 1928

Query 170 AATTGTTATTTA-ATACTTTGTCAATTTGTTGATTAAATTCAAACAATCTTCAAACCTTT 228
      |||
Sbjct 1929 AATTGTTATTTATTTA-ATTGTCAATTTGTTGATTAAATTCAAAAAATCTTCAAACCTTT 1987

Query 229 CAACAACGGATCTCTTGGTTCTCGCATCGATGAAGAACGCAGCGAAATGCGATAAGTAAT 288
      |||
Sbjct 1988 CAACAACGGATCTCTTGGTTCTCGCATCGATGAAGAACGCAGCGAAATGCGATAAGTAAT 2047

Query 289 ATGAATTGCAGATTTTCGTGAATCATCGAATCTTTGAACGCACATTGCGCCCTCTGGTAT 348
      |||
Sbjct 2048 ATGAATTGCAGATTTTCGTGAATCATCGAATCTTTGAACGCACATTGCGCCCTCTGGTAT 2107

Query 349 TCCAGAGGGCATGCCTGTTTGAGCGTCATTTCTCTCTCAAACCCTT-GGGTTTGGTATTG 407
      |||
Sbjct 2108 TCCAGAGGGCATGCCTGTTTGAGCGTCATTTCTCTCTCAAACC-TTCGGGTTTGGTATTG 2166

Query 408 AGTGATACTCTTAGTCGAACTAGGCGTTTGCTTGAAATTTATTGGCATGAGTGACGCTGA 467
      |||
Sbjct 2167 AGTGATACTCTTAGTCGAACTAGGCGTTTGCTTGAAATGTATTGGCATGAGTGGTACTG- 2225

Query 468 GA-AGTGC-ATTCAGGAAATATCAATGTATTAGGTTTATCCAACCTCGTTGACA-ATTCTT 524
      |||
Sbjct 2226 GATAGTGCTAT--ATGACTT-TCAATGTATTAGGTTTATCCAACCTCGTTGA-ATAGT-TT 2280

Query 525 GGTGTGA-ATTTTT-GGTGTT--AGGCTTGCCTTAAAAACAACAACAAGTTTGACC 580
      |||
Sbjct 2281 AATGGT-ATATTTCTCGGTATTCTAGGCTCGGCCTTACAATATAACAACAAGTTTGACC 2339

Query 581 TCAAATCAGGTAGGATTACCCGCTGAACTTAAGCATATCAATAAGCGGAGGA 632
      |||
Sbjct 2340 TCAAATCAGGTAGGATTACCCGCTGAACTTAAGCATATCAATAAGCGGAGGA 2391
```

>dbj|AB220031.1| *Debaryomyces fabryi* genes for 18S rRNA, ITS1, 5.8S rRNA, ITS2, 26S rRNA, partial sequence, strain: IFM 54260  
Length=648

Score = 819 bits (443), Expect = 0.0  
Identities = 588/652 (90%), Gaps = 33/652 (5%)  
Strand=Plus/Plus

```
Query 1 TCCGTAGGTGAACCTGCGGAAGGATCATTACTGTATTCTAATTGCCAGCGCTTAATTGCG 60
      |||
Sbjct 10 TCCGTAGGTGAACCTGCGGAAGGATCATTACAGTATTCTTTTTGCCAGCGCTTAATTGCG 69

Query 61 CGGCGATTAAACCTTACACACAATGTTTTTCT-TTATTA-GA-AACTATTGCTTTGGCT- 116
```

```

Sbjct 70      ||||| ||||||||||||||| ||||| | ||||| | ||||| ||||||||| |
CGGCGAAAAAACCTTACACACAGTGTTTTT-TGTTATTACAAGAACTTTTGCTTTGG-TC 127

Query 117     TGG-CTAAGAAATTAG-TCGGGCCAGAGGTTTAC---AC-AAACTTCAATTTTTTA-ATTG 169
||| | ||||| ||| | ||||||||||||||| | ||||||||||| ||||| |||||
Sbjct 128     TGGACT-AGAAA-TAGTTTGGGCCAGAGGTTTACTGAACTAAACTTCAATATTTATATTG 185

Query 170     AATTGTTATTTA-ATACTTTGTCAATTTGTTGATTAAATTCAAACAATCTTCAAACCTTT 228
||||||||||| || |||||||||||||||||||||||||||||||||||
Sbjct 186     AATTGTTATTTATTTA-ATTGTCAATTTGTTGATTAAATTCAAAAAATCTTCAAACCTTT 244

Query 229     CAACAACGGATCTCTTGGTTCTCGCATCGATGAAGAACGCAGCGAAATGCGATAAGTAAT 288
|||||||||||||||||||||||||||||||||||||||||||||||||
Sbjct 245     CAACAACGGATCTCTTGGTTCTCGCATCGATGAAGAACGCAGCGAAATGCGATAAGTAAT 304

Query 289     ATGAATTGCAGATTTTCGTGAATCATCGAATCTTTGAACGCACATTGCGCCCTCTGGTAT 348
|||||||||||||||||||||||||||||||||||||||||||||||||
Sbjct 305     ATGAATTGCAGATTTTCGTGAATCATCGAATCTTTGAACGCACATTGCGCCCTCTGGTAT 364

Query 349     TCCAGAGGGCATGCCTGTTTGAGCGTCATTTCTCTCTCAAACCTT-GGGTTTGGTATTG 407
||||||||||||||||||||||||||||||||||||||||||||||| |
Sbjct 365     TCCAGAGGGCATGCCTGTTTGAGCGTCATTTCTCTCTCAAACC-TTCGGGTTTGGTATTG 423

Query 408     AGTGATACTCTTAGTTCGAACTAGGCGTTTGCTTGAAATTTATTGGCATGAGTGACGCTGA 467
||||||||||||||||||||||||||||||||||||||||||||||| |||
Sbjct 424     AGTGATACTCTTAGTTCGAACTAGGCGTTTGCTTGAAATGTATTGGCATGAGTGGTACTG- 482

Query 468     GA-AGTGC-ATTCAGGAAATATCAATGTATTAGGTTTATCCAACCTCGTTGACA-ATTCTT 524
|| ||||| || | || | ||||||||||||||||||||||||||| | | | |
Sbjct 483     GATAGTGCTAT--ATGACTT-TCAATGTATTAGGTTTATCCAACCTCGTTGA-ATAGT-TT 537

Query 525     GGTGTGA-ATTTTT-GGTGTT--AGGCTTTGCCTTAAAAACAACAACAAGTTTGACC 580
| || | ||||| || | || || ||||| || ||||| || ||||| |||||
Sbjct 538     AATGGT-ATATTTCTCGGTATTCTAGGCTCGGCCTTACAATATAACAACAAGTTTGACC 596

Query 581     TCAAATCAGGTAGGATTACCCGCTGAACTTAAGCATATCAATAAGCGGAGGA 632
|||||||||||||||||||||||||||||||||||||||||||||||
Sbjct 597     TCAAATCAGGTAGGATTACCCGCTGAACTTAAGCATATCAATAAGCGGAGGA 648

```

>gb|EU149789.1| *Debaryomyces hansenii* strain CBS 10686 18S ribosomal RNA gene, partial sequence; internal transcribed spacer 1, 5.8S ribosomal RNA gene, and internal transcribed spacer 2, complete sequence; and 28S ribosomal RNA gene, partial sequence  
Length=639

Score = 819 bits (443), Expect = 0.0  
Identities = 588/652 (90%), Gaps = 33/652 (5%)  
Strand=Plus/Plus

```

Query 1      TCCGTAGGTGAACCTGCGGAAGGATCATTACTGTATTCTAATTGCCAGCGCTTAATTGCG 60
|||||||||||||||||||||||||||||||||||||||||||||||
Sbjct 1      TCCGTAGGTGAACCTGCGGAAGGATCATTACAGTATTCTTTTTGCCAGCGCTTAATTGCG 60

Query 61     CGGCGATTAAACCTTACACACAATGTTTTTCT-TTATTA-GA-AACTATTGCTTTGGCT- 116
||||| ||||||||||||||| ||||| | ||||| | ||||| ||||| |
Sbjct 61     CGGCGAAAAAACCTTACACACAGTGTTTTT-TGTTATTACAAGAACTTTTGCTTTGG-TC 118

Query 117    TGG-CTAAGAAATTAG-TCGGGCCAGAGGTTTAC---AC-AAACTTCAATTTTTTA-ATTG 169
||| | ||||| ||| | ||||||||||||||| | ||||||||||| ||||| |||||
Sbjct 119    TGGACT-AGAAA-TAGTTTGGGCCAGAGGTTTACTGAACTAAACTTCAATATTTATATTG 176

Query 170    AATTGTTATTTA-ATACTTTGTCAATTTGTTGATTAAATTCAAACAATCTTCAAACCTTT 228
||||||||||| || |||||||||||||||||||||||||||||||||||

```











Score = 819 bits (443), Expect = 0.0  
Identities = 588/652 (90%), Gaps = 33/652 (5%)  
Strand=Plus/Plus

```
Query 1 TCCGTAGGTGAACCTGCGGAAGGATCATTACTGTATTCTAATTGCCAGCGCTTAATTGCG 60
      |||
Sbjct 1 TCCGTAGGTGAACCTGCGGAAGGATCATTACAGTATTCTTTTTGCCAGCGCTTAATTGCG 60

Query 61 CGGCGATTAAACCTTACACACAATGTTTTTCT-TTATTA-GA-AACTATTGCTTTGGCT- 116
      |||
Sbjct 61 CGGCGAAAAAACCTTACACACAGTGTTTTT-TGTTATTACAAGAACTTTTGCTTTGG-TC 118

Query 117 TGG-CTAAGAAATTAG-TCGGGCCAGAGGTTTAC---AC-AACTTCAATTTTTTA-ATTG 169
      |||
Sbjct 119 TGGACT-AGAAA-TAGTTTGGGCCAGAGGTTTACTGAACTAAACTTCAATATTTATATTG 176

Query 170 AATTGTTATTTA-ATACTTTGTCAATTTGTTGATTAAATTCAAACAATCTTCAAACCTTT 228
      |||
Sbjct 177 AATTGTTATTTATTTA-ATTGTCAATTTGTTGATTAAATTCAAAAAATCTTCAAACCTTT 235

Query 229 CAACAACGGATCTCTTGGTTCTCGCATCGATGAAGAACGCAGCGAAAATGCGATAAGTAAT 288
      |||
Sbjct 236 CAACAACGGATCTCTTGGTTCTCGCATCGATGAAGAACGCAGCGAAAATGCGATAAGTAAT 295

Query 289 ATGAATTGCAGATTTTCGTGAATCATCGAATCTTTGAACGCACATTGCGCCCTCTGGTAT 348
      |||
Sbjct 296 ATGAATTGCAGATTTTCGTGAATCATCGAATCTTTGAACGCACATTGCGCCCTCTGGTAT 355

Query 349 TCCAGAGGGCATGCCTGTTTGAGCGTCATTTCTCTCTCAAACCTT-GGGTTTGGTATTG 407
      |||
Sbjct 356 TCCAGAGGGCATGCCTGTTTGAGCGTCATTTCTCTCTCAAACC-TTCGGTTTGGTATTG 414

Query 408 AGTGATACTCTTAGTCGAACTAGGCGTTTGCTTGAAATTTATTGGCATGAGTGACGCTGA 467
      |||
Sbjct 415 AGTGATACTCTTAGTCGAACTAGGCGTTTGCTTGAAATGTATTGGCATGAGTGGTACTG- 473

Query 468 GA-AGTGC-ATTCAGGAAATATCAATGTATTAGGTTTATCCAACCTCGTTGACA-ATTCTT 524
      |||
Sbjct 474 GATAGTGCTAT--ATGACTT-TCAATGTATTAGGTTTATCCAACCTCGTTGA-ATAGT-TT 528

Query 525 GGTGTGA-ATTTTT-GGTGTT--AGGCTTGCCTTAAAAACAACAACAAGTTTGACC 580
      |||
Sbjct 529 AATGGT-ATATTCTCGGTATTCTAGGCTCGGCCTTACAATATAACAACAAGTTTGACC 587

Query 581 TCAAATCAGGTAGGATTACCCGCTGAACTTAAGCATATCAATAAGCGGAGGA 632
      |||
Sbjct 588 TCAAATCAGGTAGGATTACCCGCTGAACTTAAGCATATCAATAAGCGGAGGA 639
```

>gb|GU213439.1| Saccharomyces sp. HZ10 18S ribosomal RNA gene, partial sequence;  
internal transcribed spacer 1, 5.8S ribosomal RNA gene,  
and internal transcribed spacer 2, complete sequence; and  
28S ribosomal RNA gene, partial sequence  
Length=640

Score = 817 bits (442), Expect = 0.0  
Identities = 586/650 (90%), Gaps = 31/650 (4%)  
Strand=Plus/Plus

```
Query 1 TCCGTAGGTGAACCTGCGGAAGGATCATTACTGTATTCTAATTGCCAGCGCTTAATTGCG 60
      |||
Sbjct 3 TCCGTAGGTGAACCTGCGGAAGGATCATTACAGTATTCTTTTTGCCAGCGCTTAATTGCG 62
```

```

Query 61  CGGCGATTAAACCTTACACACAATGTTTTTCT-TTATTA-GA-AACTATTGCTTTGGCT- 116
          |||||  |||||||||||||||  |||||||  |  |||||||  |  |||||||||||||||  |
Sbjct 63  CGGCGAAAAAACCTTACACACTATGTTTTT-TGTTATTACAAGAACTATTGCTTTGG-TC 120

Query 117 TGGCT-AAGAAATTAG--TCGGGCCAGAGGTTTACAC-AACTTCAATTTTTA-ATTGAA 171
          ||  ||  |||||  |||  |  |||||||||||||||  ||  |||||||  |||||  |||||
Sbjct 121 TGTCTCTAGAAA-TAGATTTGGGCCAGAGGTTA-ACTAAACTTCAA-TTTTATATTGAA 177

Query 172 TTGTTATTTAA--TACTTTGTCAATTTGTTGATTAAATTCAAACAATCTTCAAACCTTTC 229
          |||||  |  |||  ||  |||||||||||||||  |||||||  |||||||  |||||||
Sbjct 178 TTGTT-TCTAATTTA-ATTGTCAATTTGTTGATTAAATTTCAAAAAATCTTCAAACCTTTC 235

Query 230  AACACGGATCTCTTGTTCTCGCATCGATGAAGAACGCAGCGAAATGCGATAAGTAATA 289
          |||||||||||||||  |||||||||||||||  |||||||||||||||  |||||||||||||||
Sbjct 236  AACACGGATCTCTTGTTCTCGCATCGATGAAGAACGCAGCGAAATGCGATAAGTAATA 295

Query 290  TGAATTGCAGATTTTCGTGAATCATCGAATCTTTGAACGCACATTGCGCCCTCTGGTATT 349
          |||||||||||||||  |||||||||||||||  |||||||||||||||  |||||||||||||||
Sbjct 296  TGAATTGCAGATTTTCGTGAATCATCGAATCTTTGAACGCACATTGCGCCCTCTGGTATT 355

Query 350  CCAGAGGGCATGCCTGTTTGAGCGTCATTTCTCTCTCAAACCTTGGGTTTGGTATTGAG 409
          |||||||||||||||  |||||||||||||||  |||||||||||||||  |||||||||||||||
Sbjct 356  CCAGAGGGCATGCCTGTTTGAGCGTCATTTCTCTCTCAAACCTTGGGTTTGGTATTGAG 415

Query 410  TGATACTCTTAGTCGAACTAGGCGTTTGCTTGAAATTTATTGGCATGAGT-G-ACGCTGA 467
          |||||||||||||||  |||||||||||||||  |||||||||||||||  |||||||||||||||
Sbjct 416  TGATACTCTTAGTCGAACTAGGCGTTTGCTTGAAATGTATCGGCATGAGTAGTAC--TGA 473

Query 468  GA-AGTGCATTCAGGAAATAT-CAATGTATTAGTTTATCCAACCTCGTTGACAATTCTTG 525
          |  |||  |  |||  ||  |  |||||||||||||||  |||||||  |||  |||
Sbjct 474  -ATAGTAC-TTCAAGACTTTTTTCAATGTATTAGTTTATCCAACCTCGTTGA-A-TGGTTT 529

Query 526  -GTTGTGAATTTTTGGTGTTA--GGCTTTGCCTTAAAAACAACAACAAGTTTGACCTC 582
          ||  ||  |||||||  ||  |||  |||  |||||  |||||  |||||  |||||
Sbjct 530  AGTAGTAAATTTTTAGTATTATTGGCTCGGCCTTACAATACAACAACAAGTTTGACCTC 589

Query 583  AAATCAGGTAGGATTACCCGCTGAACTTAAGCATATCAATAAGCGGAGGA 632
          |||||||||||  |||||||||||  |||||||||||  |||||||||||
Sbjct 590  AAATCAGGTAGGACTACCCGCTGAACTTAAGCATATCAATAAGCGGAGGA 639

```

>emb|FM178351.1| Candida glabosa 18S rRNA gene (partial), ITS1, 5.8S rRNA gene, ITS2 and 28S rRNA gene (partial), strain WM 07.36  
Length=637

Score = 815 bits (441), Expect = 0.0  
Identities = 582/644 (90%), Gaps = 33/644 (5%)  
Strand=Plus/Plus

```

Query 1  TCCGTAGGTGAACCTGCGGAAGGATCATTACTGTATTCTAATTGCCAGCGCTTAATTGCG 60
          |||||||  |||||||||||||||  |||||||  |||||||  |||||||  |||||||
Sbjct 13  TCCGTAGGTGAACCTGCGGAAGGATCATTACAGTATTCT-ATTGCCTGCGCTTAATTGCG 71

Query 61  CGGCGATTAAACCTTACACACAATGT-TTTTCTTTATTA-GAAACTATTGCTTTGGCTTG 118
          |||||  |||||||||||||||  |||||||  |||||||  |||||||  |||||||
Sbjct 72  CGGCGA-TAAACCTT--ACACAACGTGTTTTT-TTTATTATG-AACTATTACTTTGGTTTG 126

Query 119 GCTAAGAAATTAGTCGGGCCAGAGGTTTACACAAACTTCAATTTTTAATTGAATTGTTA- 177
          |||||||||||  |||||||  |||  |||  |||||||  |||||  |||||  |||||
Sbjct 127 GCTAAGAAATTAGTTGAGCCAGAGG-TGATTTAAACTTCAA-TTTT-ATTGAATTGTTAT 183

Query 178 TTTAATACT-TTGTCAATTTGTTGATTAAATTC-AAACAATCTTCAAACCTTTCACAAC 235
          |||||  |  |||||||  |||||  |||  |||  |||||||  |||||  |||||
Sbjct 184 TTTAAT-TTATTGTCAATTTGTTGATTAAATTCAAAACAATCTTCAAACCTTTCACAAC 242

```

```

Query 236 GGATCTCTTGGTTCTCGCATCGATGAAGAACGCAGCGAAATGCGATAAGTAATATGAATT 295
          |||
Sbjct 243 GGATCTCTTGGTTCTCGCATCGATGAAGAACGCAGCGAAATGCGATAAGTAATATGAATT 302

Query 296 GCAGATTTTCGTGAATCATCGAATCTTTGAACGCACATTGCGCCCTCTGGTATTCCAGAG 355
          |||
Sbjct 303 GCAGATTTTCGTGAATCATCGAATCTTTGAACGCACATTGCACCCTCTGGTATTCCAGAG 362

Query 356 GGCATGCCTGTTTGAGCGTCATTTCTCTCTCAAACCTTGGGTTTGGTATTGAGTGATAC 415
          ||
Sbjct 363 GGTATGCCTGTTTGAGCGTCATTTCTCTCTCAAACCTTGGGTTTGGTATTGAGTGATAC 422

Query 416 TCTTAGTCGAACTAGGCGTTTGCTTGAAATTTATTGGCATGAGT-GACGCTGAGA-AGTG 473
          |||
Sbjct 423 TCTTAGTCGAACTAGGCGTTTGCTTGAAATATATTGGCACGAGTAGT-GTTGA-ACAGTG 480

Query 474 CAT-TCAGGAAATATCAATGTATTAGGTTTATCCAACCTCGTTGACAAT-TCTT-GGTTGT 530
          |||
Sbjct 481 T-TGTCTG-AAC-ATCAATGTATTAGGTTTATCCAACCTCGTTGA-AGCGT-TTAGGTCGT 535

Query 531 GAAT-TT-TTGGTGTTAGGCTTTGCCTTAAAAACAACAACAAGTTTGACCTCAAATCA 588
          |||
Sbjct 536 -ACTATTCTTCAT-T-AGGCTTTGCCTTATAAAACA-CAAACAAGTTTGACCTCAAATCA 591

Query 589 GGTAGGATTACCCGCTGAACTTAAGCATATCAATAAGCGGAGGA 632
          |||
Sbjct 592 GGTAGGATTACCCGCTGAACTTAAGCATATCAATAAGCGGAGGA 635

```

>gb|HM032737.1| *Debaryomyces hansenii* strain NJ147 18S ribosomal RNA gene, partial sequence; internal transcribed spacer 1, 5.8S ribosomal RNA gene, and internal transcribed spacer 2, complete sequence; and 28S ribosomal RNA gene, partial sequence  
Length=637

Score = 813 bits (440), Expect = 0.0  
Identities = 585/649 (90%), Gaps = 33/649 (5%)  
Strand=Plus/Plus

```

Query 4 GTAGGTGAACCTGCGGAAGGATCATTACTGTATTCTAATTGCCAGCGCTTAATTGCGCGG 63
          |||
Sbjct 1 GTAGGTGAACCTGCGGAAGGATCATTACAGTATTCTTTTTGCCAGCGCTTAATTGCGCGG 60

Query 64 CGATTAAACCTTACACACAATGTTTTTCT-TTATTA-GA-AACTATTGCTTTGGCT-TGG 119
          |||
Sbjct 61 CGAAAAAACCTTACACACAGTGTTTTT-TGTTATTACAAGAACTTTTGCTTTGG-TCTGG 118

Query 120 -CTAAGAAATTAG-TCGGGCCAGAGGTTTAC---AC-AACTTCAATTTTTA-ATTGAAT 172
          |||
Sbjct 119 ACT-AGAAA-TAGTTTGGGCCAGAGGTTTACTGAACTAACTTCAATATTTATATTGAAT 176

Query 173 TGTTATTTA-ATACTTTGTCAATTTGTTGATTAAATTCAAACAATCTTCAAACCTTTCAA 231
          |||
Sbjct 177 TGTTATTTATTTA-ATTGTCAATTTGTTGATTAAATTCAAAAAATCTTCAAACCTTTCAA 235

Query 232 CAACGGATCTCTTGGTTCTCGCATCGATGAAGAACGCAGCGAAATGCGATAAGTAATATG 291
          |||
Sbjct 236 CAACGGATCTCTTGGTTCTCGCATCGATGAAGAACGCAGCGAAATGCGATAAGTAATATG 295

Query 292 AATTGCAGATTTTCGTGAATCATCGAATCTTTGAACGCACATTGCGCCCTCTGGTATTCC 351
          |||
Sbjct 296 AATTGCAGATTTTCGTGAATCATCGAATCTTTGAACGCACATTGCGCCCTCTGGTATTCC 355

```

```

Query 352 AGAGGGCATGCCTGTTTGAGCGTCATTTCTCTCTCAAACCCTT-GGGTTTGGTATTGAGT 410
          |||
Sbjct 356 AGAGGGCATGCCTGTTTGAGCGTCATTTCTCTCTCAAACC-TTCGGGTTTGGTATTGAGT 414

Query 411 GATACTCTTAGTCGAACTAGGCGTTTGCTTGAAATTTATTGGCATGAGTGACGCTGAGA- 469
          |||
Sbjct 415 GATACTCTTAGTCGAACTAGGCGTTTGCTTGAAATGTATTGGCATGAGTGGTACTG-GAT 473

Query 470 AGTGC-ATTCAGGAAATATCAATGTATTAGGTTTATCCAACCTCGTTGACA-ATTCTTGGT 527
          |||
Sbjct 474 AGTGCTAT--ATGACTT-TCAATGTATTAGGTTTATCCAACCTCGTTGA-ATAGT-TTAAT 528

Query 528 TGTGA-ATTTTT-GGTGTT--AGGCTTTCCTTAAAAACAACAACAAGTTTGACCTCA 583
          |||
Sbjct 529 GGT-ATATTTCTCGGTATTCTAGGCTCGGCCTTACAATATAACAACAAGTTTGACCTCA 587

Query 584 AATCAGGTAGGATTACCCGCTGAACTTAAGCATATCAATAAGCGGAGGA 632
          |||
Sbjct 588 AATCAGGTAGGATTACCCGCTGAACTTAAGCATATCAATAAGCGGAGGA 636

```

>gb|GQ458041.1| *Debaryomyces hansenii* strain ATCC 60978 18S ribosomal RNA gene, partial sequence; internal transcribed spacer 1, 5.8S ribosomal RNA gene, and internal transcribed spacer 2, complete sequence; and 28S ribosomal RNA gene, partial sequence  
Length=2961

Score = 813 bits (440), Expect = 0.0  
Identities = 587/652 (90%), Gaps = 33/652 (5%)  
Strand=Plus/Plus

```

Query 1 TCCGTAGGTGAACCTGCGGAAGGATCATTACTGTATTCTAATTGCCAGCGCTTAATTGCG 60
          |||
Sbjct 1729 TCCGTAGGTGAACCTGCGGAAGGATCATTACAGTATTCTTTTTGCCAGCGCTTAATTGCG 1788

Query 61 CGGCGATTAAACCTTACACACAATGTTTTTCT-TTATTA-GA-AACTATTGCTTTGGCT- 116
          |||
Sbjct 1789 CGGCGAAAAAACCTTACACACAGTGTTTTT-TGTTATTACAAGAACTTTTGCTTTGG-TC 1846

Query 117 TGG-CTAAGAAATTAG-TCGGGCCAGAGGTTTAC---AC-AACTTCAATTTTTTA-ATTG 169
          |||
Sbjct 1847 TGGACT-AGAAA-TAGTTTGGGCCAGAGGTTTACTGAACTAACTTCAATATTTATATTG 1904

Query 170 AATTGTTATTTA-ATACTTTGTCAATTTGTTGATTAAATTCAAACAATCTTCAAACCTTT 228
          |||
Sbjct 1905 AATTGTTATTTATTTA-ATTGTCAATTTGTTGATTAAATTCAAAAAATCTTCAAACCTTT 1963

Query 229 CAACAACGGATCTCTTGTTCTCGCATCGATGAAGAACGCAGCGAAATGCGATAAGTAAT 288
          |||
Sbjct 1964 CAACAACGGATCTCTTGTTCTCGCATCGATGAAGAACGCAGCGAAATGCGATAAGTAAT 2023

Query 289 ATGAATTGCAGATTTTCGTGAATCATCGAATCTTTGAACGCACATTGCGCCCTCTGGTAT 348
          |||
Sbjct 2024 ATGAATTGCAGATTTTCGTGAATCATCGAATCTTTGAACGCACATTGCGCCCTCTGGTAT 2083

Query 349 TCCAGAGGGCATGCCTGTTTGAGCGTCATTTCTCTCTCAAACCCTT-GGGTTTGGTATTG 407
          |||
Sbjct 2084 TCCAGAGGGCATGCCTGTTTGAGCGTCATTTCTCTCTCAAACC-TTCGGGTTTGGTATTG 2142

Query 408 AGTGATACTCTTAGTCGAACTAGGCGTTTGCTTGAAATTTATTGGCATGAGTGACGCTGA 467
          |||
Sbjct 2143 AGTGATACTCTTAGTTGAACTAGGCGTTTGCTTGAAATGTATTGGCATGAGTGGTACTG- 2201

Query 468 GA-AGTGC-ATTCAGGAAATATCAATGTATTAGGTTTATCCAACCTCGTTGACA-ATTCTT 524

```



Sbjct 2324 TCAAATCAGGTAGGATTACCCGCTGAACTTAAGCATATCAATAAGCGGAGGA 2375

>gb|GQ376084.1| *Debaryomyces hansenii* var. *hansenii* isolate UOA/HCPF 5104 18S ribosomal RNA gene, partial sequence; internal transcribed spacer 1, 5.8S ribosomal RNA gene, and internal transcribed spacer 2, complete sequence; and 28S ribosomal RNA gene, partial sequence  
Length=663

Score = 813 bits (440), Expect = 0.0  
Identities = 587/652 (90%), Gaps = 33/652 (5%)  
Strand=Plus/Plus

```
Query 1 TCCGTAGGTGAACCTGCGGAAGGATCATTACTGTATTCTAATTGCCAGCGCTTAATTGCG 60
      |||
Sbjct 25 TCCGTAGGTGAACCTGCGGAAGGATCATTACAGTATTCTTTTGGCCAGCGCTTAATTGCG 84

Query 61 CGGCGATTAAACCTTACACACAATGTTTTTCT-TTATTA-GA-AACTATTGCTTTGGCT- 116
      |||
Sbjct 85 CGGCGAAAAAACCTTACACACAGTGTTTTT-TGTTATTACAAGAACTTTTGGCTTTGG-TC 142

Query 117 TGG-CTAAGAAATTAG-TCGGGCCAGAGGTTTAC---AC-AACTTCAATTTTTTA-ATTG 169
      |||
Sbjct 143 TGGACT-AGAAA-TAGTTTGGGCCAGAGGTTTACTGAACTAAACTTCAATATTTATATTG 200

Query 170 AATTGTTATTTA-ATACTTTGTCAATTTGTTGATTAAATTCAAACAATCTTCAAACCTTT 228
      |||
Sbjct 201 AATTGTTATTTATTTA-ATTGTCAATTTGTTGATTAAATTCAAAAAATCTTCAAACCTTT 259

Query 229 CAACAACGGATCTCTTGGTTCTCGCATCGATGAAGAACGCAGCGAAATGCGATAAGTAAT 288
      |||
Sbjct 260 CAACAACGGATCTCTTGGTTCTCGCATCGATGAAGAACGCAGCGAAATGCGATAAGTAAT 319

Query 289 ATGAATTGCAGATTTTCGTGAATCATCGAATCTTTGAACGCACATTGCGCCCTCTGGTAT 348
      |||
Sbjct 320 ATGAATTGCAGATTTTCGTGAATCATCGAATCTTTGAACGCACATTGCGCCCTCTGGTAT 379

Query 349 TCCAGAGGGCATGCCTGTTTGAGCGTCATTTCTCTCTCAAACCCTT-GGGTTTGGTATTG 407
      |||
Sbjct 380 TCCAGAGGGCATGCCTGTTTGAGCGTCATTTCTCTCTCAAACC-TTCGGTTTGGTATTG 438

Query 408 AGTGATACTCTTAGTTCGAACTAGGCGTTTGCTTGAATTTATTGGCATGAGTGACGCTGA 467
      |||
Sbjct 439 AGTGATACTCTTAGTTGAACTAGGCGTTTGCTTGAATGTATTGGCATGAGTGGTACTG- 497

Query 468 GA-AGTGC-ATTCAGGAAATATCAATGTATTAGGTTTATCCAACCTCGTTGACA-ATTCTT 524
      |||
Sbjct 498 GATAGTGCTAT--ATGACTT-TCAATGTATTAGGTTTATCCAACCTCGTTGA-ATAGT-TT 552

Query 525 GGTGTGTA-ATTTTT-GGTGTT--AGGCTTGCCTTAAAAACAACAACAAGTTTGACC 580
      |||
Sbjct 553 AATGGT-ATATTCTCGGTATTCTAGGCTCGGCCTTACAATATAACAACAAGTTTGACC 611

Query 581 TCAAATCAGGTAGGATTACCCGCTGAACTTAAGCATATCAATAAGCGGAGGA 632
      |||
Sbjct 612 TCAAATCAGGTAGGATTACCCGCTGAACTTAAGCATATCAATAAGCGGAGGA 663
```

>dbj|AB220030.1| *Debaryomyces hansenii* var. *hansenii* genes for 18S rRNA, ITS1, 5.8S rRNA, ITS2, 26S rRNA, partial sequence, strain: IFM 54259  
Length=648

Score = 813 bits (440), Expect = 0.0

Identities = 587/652 (90%), Gaps = 33/652 (5%)  
Strand=Plus/Plus

```
Query 1 TCCGTAGGTGAACCTGCGGAAGGATCATTACTGTATTCTAATTGCCAGCGCTTAATTGCG 60
      |||
Sbjct 10 TCCGTAGGTGAACCTGCGGAAGGATCATTACAGTATTCTTTTTGCCAGCGCTTAATTGCG 69

Query 61 CGGCGATTAAACCTTACACACAATGTTTTTCT-TTATTA-GA-AACTATTGCTTTGGCT- 116
      |||
Sbjct 70 CGGCGAAAAAACCTTACACACAGTGTTTTT-TGTTATTACAAGAACTTTTGGCTTTGG-TC 127

Query 117 TGG-CTAAGAAATTAG-TCGGGCCAGAGGTTTAC---AC-AACTTCAATTTTTTA-ATTG 169
      |||
Sbjct 128 TGGACT-AGAAA-TAGTTTGGGCCAGAGGTTTACTGAACTAACTTCAATATTTATATTG 185

Query 170 AATTGTTATTTA-ATACTTTGTCAATTTGTTGATTAAATTCAAACAATCTTCAAACCTTT 228
      |||
Sbjct 186 AATTGTTATTTATTTA-ATTGTCAATTTGTTGATTAAATTCAAAAAATCTTCAAACCTTT 244

Query 229 CAACAACGGATCTCTTGGTTCTCGCATCGATGAAGAACGCAGCGAAATGCGATAAGTAAT 288
      |||
Sbjct 245 CAACAACGGATCTCTTGGTTCTCGCATCGATGAAGAACGCAGCGAAATGCGATAAGTAAT 304

Query 289 ATGAATTGCAGATTTTCGTGAATCATCGAATCTTTGAACGCACATTGCGCCCTCTGGTAT 348
      |||
Sbjct 305 ATGAATTGCAGATTTTCGTGAATCATCGAATCTTTGAACGCACATTGCGCCCTCTGGTAT 364

Query 349 TCCAGAGGGCATGCCTGTTTGAGCGTCATTTCTCTCTCAAACCTT-GGGTTTGGTATTG 407
      |||
Sbjct 365 TCCAGAGGGCATGCCTGTTTGAGCGTCATTTCTCTCTCAAACC-TTCGGTTTGGTATTG 423

Query 408 AGTGATACTCTTAGTTCGAACTAGGCGTTTGCTTGAATTTATTGGCATGAGTGACGCTGA 467
      |||
Sbjct 424 AGTGATACTCTTAGTTGAACTAGGCGTTTGCTTGAATGTATTGGCATGAGTGGTACTG- 482

Query 468 GA-AGTGC-ATTCAGGAAATATCAATGTATTAGGTTTATCCAACCTCGTTGACA-ATTCTT 524
      |||
Sbjct 483 GATAGTGCTAT--ATGACTT-TCAATGTATTAGGTTTATCCAACCTCGTTGA-ATAGT-TT 537

Query 525 GGTGTGA-ATTTTT-GGTGTT--AGGCTTGCCTTAAAAACAACAACAAGTTTGACC 580
      |||
Sbjct 538 AATGGT-ATATTCTCGGTATTCTAGGCTCGGCCTTACAATATAACAACAAGTTTGACC 596

Query 581 TCAAATCAGGTAGGATTACCCGCTGAACTTAAGCATATCAATAAGCGGAGGA 632
      |||
Sbjct 597 TCAAATCAGGTAGGATTACCCGCTGAACTTAAGCATATCAATAAGCGGAGGA 648
```

>gb|EU569039.1| *Debaryomyces hansenii* isolate CNRMA 200600362 18S ribosomal RNA gene, partial sequence; internal transcribed spacer 1, 5.8S ribosomal RNA gene, and internal transcribed spacer 2, complete sequence; and 28S ribosomal RNA gene, partial sequence  
Length=639

Score = 813 bits (440), Expect = 0.0  
Identities = 587/652 (90%), Gaps = 33/652 (5%)  
Strand=Plus/Plus

```
Query 1 TCCGTAGGTGAACCTGCGGAAGGATCATTACTGTATTCTAATTGCCAGCGCTTAATTGCG 60
      |||
Sbjct 1 TCCGTAGGTGAACCTGCGGAAGGATCATTACAGTATTCTTTTTGCCAGCGCTTAATTGCG 60

Query 61 CGGCGATTAAACCTTACACACAATGTTTTTCT-TTATTA-GA-AACTATTGCTTTGGCT- 116
      |||
```

```

Sbjct 61 CGGCGAAAAACCTTACACACAGTGTTTTT-TGTTATTACAAGAACTTTTGCTTTGG-TC 118
Query 117 TGG-CTAAGAAATTAG-TCGGGCCAGAGGTTTAC---AC-AACTTCAATTTTTTA-ATTG 169
      ||| || ||||| ||| | ||||| ||||| ||||| ||||| ||||| |||||
Sbjct 119 TGGACT-AGAAA-TAGTTTGGGCCAGAGGTTTACTGAACTAAACTTCAATATTTATATTG 176
Query 170 AATTGTTATTTA-ATACTTTGTCAATTTGTTGATTAAATTCAAACAATCTTCAAACCTTT 228
      ||||| ||||| ||| | ||||| ||||| ||||| ||||| ||||| |||||
Sbjct 177 AATTGTTATTTATTTA-ATTGTCAATTTGTTGATTAAATTCAAAAAATCTTCAAACCTTT 235
Query 229 CAACAACGGATCTCTTGGTTCTCGCATCGATGAAGAACGCAGCGAAATGCGATAAGTAAT 288
      ||||| ||||| ||||| ||||| ||||| ||||| ||||| ||||| |||||
Sbjct 236 CAACAACGGATCTCTTGGTTCTCGCATCGATGAAGAACGCAGCGAAATGCGATAAGTAAT 295
Query 289 ATGAATTGCAGATTTTCGTGAATCATCGAATCTTTGAACGCACATTGCGCCCTCTGGTAT 348
      ||||| ||||| ||||| ||||| ||||| ||||| ||||| ||||| |||||
Sbjct 296 ATGAATTGCAGATTTTCGTGAATCATCGAATCTTTGAACGCACATTGCGCCCTCTGGTAT 355
Query 349 TCCAGAGGGCATGCCTGTTTGAGCGTCATTTCTCTCTCAAACCTT-GGGTTTGGTATTG 407
      ||||| ||||| ||||| ||||| ||||| ||||| ||||| ||||| |||||
Sbjct 356 TCCAGAGGGCATGCCTGTTTGAGCGTCATTTCTCTCTCAAACC-TTCGGGTTTGGTATTG 414
Query 408 AGTGATACTCTTAGTTCGAACTAGGCGTTTGCTTGAAATTTATTGGCATGAGTGACGCTGA 467
      ||||| ||||| ||||| ||||| ||||| ||||| ||||| ||||| |||||
Sbjct 415 AGTGATACTCTTAGTTGAACTAGGCGTTTGCTTGAAATGTATTGGCATGAGTGGTACTG- 473
Query 468 GA-AGTGC-ATTCAGGAAATATCAATGTATTAGGTTTATCCAACCTCGTTGACA-ATTCTT 524
      || ||||| || | || | ||||| ||||| ||||| ||||| ||||| |||||
Sbjct 474 GATAGTGCTAT--ATGACTT-TCAATGTATTAGGTTTATCCAACCTCGTTGA-ATAGT-TT 528
Query 525 GGTGTGA-ATTTTT-GGTGTT--AGGCTTTGCCTTAAAAACAACAACAAGTTTGACC 580
      | ||| | ||||| ||| || ||||| ||||| ||||| ||||| |||||
Sbjct 529 AATGGT-ATATTTCTCGGTATTCTAGGCTCGGCCTTACAATATAACAACAAGTTTGACC 587
Query 581 TCAAATCAGGTAGGATTACCCGCTGAACTTAAGCATATCAATAAGCGGAGGA 632
      ||||| ||||| ||||| ||||| ||||| ||||| ||||| |||||
Sbjct 588 TCAAATCAGGTAGGATTACCCGCTGAACTTAAGCATATCAATAAGCGGAGGA 639

```

>gb|EF432798.1| Pueraria montana var. lobata from China: Jiangxi 18S ribosomal RNA gene, partial sequence; internal transcribed spacer 1, 5.8S ribosomal RNA gene, and internal transcribed spacer 2, complete sequence; and 28S ribosomal RNA gene, partial sequence  
Length=657

Score = 813 bits (440), Expect = 0.0  
Identities = 587/652 (90%), Gaps = 33/652 (5%)  
Strand=Plus/Plus

```

Query 1 TCCGTAGGTGAACCTGCGGAAGGATCATTACTGTATTCTAATTGCCAGCGCTTAATTGCG 60
      ||||| ||||| ||||| ||||| ||||| ||||| ||||| ||||| |||||
Sbjct 19 TCCGTAGGTGAACCTGCGGAAGGATCATTACAGTATTCTTTTTGCCAGCGCTTAATTGCG 78
Query 61 CGGCGATTAAACCTTACACACAATGTTTTTCT-TTATTA-GA-AACTATTGCTTTGGCT- 116
      ||||| ||||| ||||| ||||| ||||| ||||| ||||| ||||| |||||
Sbjct 79 CGGCGAAAAACCTTACACACAGTGTTTTT-TGTTATTACAAGAACTTTTGCTTTGG-TC 136
Query 117 TGG-CTAAGAAATTAG-TCGGGCCAGAGGTTTAC---AC-AACTTCAATTTTTTA-ATTG 169
      ||| || ||||| ||| | ||||| ||||| ||||| ||||| ||||| |||||
Sbjct 137 TGGACT-AGAAA-TAGTTTGGGCCAGAGGTTTACTGAACTAAACTTCAATATTTATATTG 194
Query 170 AATTGTTATTTA-ATACTTTGTCAATTTGTTGATTAAATTCAAACAATCTTCAAACCTTT 228
      ||||| ||||| ||| | ||||| ||||| ||||| ||||| ||||| |||||
Sbjct 195 AATTGTTATTTATTTA-ATTGTCAATTTGTTGATTAAATTCAAAAAATCTTCAAACCTTT 253

```









Sbjct 578 AGGATTACCCGCTGAACTTAAGCATATCAATAAGCGGAGGA 618

>dbj|AB220032.1| Candida psychrophila genes for 18S rRNA, ITS1, 5.8S rRNA, ITS2, 26S rRNA, partial sequence, strain: IFM 54261  
Length=649

Score = 809 bits (438), Expect = 0.0  
Identities = 587/653 (89%), Gaps = 34/653 (5%)  
Strand=Plus/Plus

```
Query 1 TCCGTAGGTGAACCTGCGGAAGGATCATTACTGTATTCTAATTGCCAGCGCTTAATTGCG 60
      |||
Sbjct 10 TCCGTAGGTGAACCTGCGGAAGGATCATTACAGTATTCTTTTGGCCAGCGCTTAATTGCG 69

Query 61 CGGCGATTAAACCTTACACACAATGTTTTTCT-TTATTA-GA-AACTATTGCTTTGGCT- 116
      |||
Sbjct 70 CGGCGAAAAAACCTTACACACAGTGTTTTT-TGTTATTACAAGAACTTTTGGCTTTGG-TC 127

Query 117 TGG-CTAAGAAATTAG-TCGGGCCAGAGGTTTAC---AC-AACTTCAATTTTTA-ATTG 169
      |||
Sbjct 128 TGGACT-AGAAA-TAGTTTGGGCCAGAGGTTTACTAAACTAAACTTCAATATTTATATTG 185

Query 170 AATTGTTATTTAATACT--TTGTCAATTTGTTGATTAAATTCAAACAATCTTCAAACCTT 227
      |||
Sbjct 186 AATTGTTATTT-ATTTAATTGTCAATTTGTTGATTAAATTCAAAAAATCTTCAAACCTT 244

Query 228 TCAACAACGGATCTCTTGGTTCTCGCATCGATGAAGAACGCAGCGAAATGCGATAAGTAA 287
      |||
Sbjct 245 TCAACAACGGATCTCTTGGTTCTCGCATCGATGAAGAACGCAGCGAAATGCGATAAGTAA 304

Query 288 TATGAATTGCAGATTTTCGTGAATCATCGAATCTTTGAACGCACATTGCGCCCTCTGGTA 347
      |||
Sbjct 305 TATGAATTGCAGATTTTCGTGAATCATCGAATCTTTGAACGCACATTGCGCCCTCTGGTA 364

Query 348 TTCCAGAGGGCATGCCTGTTTGAGCGTCATTTCTCTCTCAAACCCTT-GGGTTTGGTATT 406
      |||
Sbjct 365 TTCCAGAGGGCATGCCTGTTTGAGCGTCATTTCTCTCTCAAACC-TTCGGGTTTGGTATT 423

Query 407 GAGTGATACTCTTAGTCGAACTAGGCGTTTGCTTGAAATTTATTGGCATGAGTGACGCTG 466
      |||
Sbjct 424 GAGTGATACTCTTAGTCGAACTAGGCGTTTGCTTGAAATGTATTGGCATGAGTGGTACTG 483

Query 467 AGA-AGTGC-ATTCAGGAAATATCAATGTATTAGGTTTATCCAACCTCGTTGACA-ATTCT 523
      |||
Sbjct 484 -GATAGTGCTAT--ATGACTT-TCAATGTATTAGGTTTATCCAACCTCGTTGA-ATAGT-T 537

Query 524 TGGTTGTGA-ATTTTT-GGTGTT--AGGCTTGCCTTAAAAACAACAACAAGTTTGAC 579
      |||
Sbjct 538 TAATGGT-ATATTTCTCGGTATTCTAGGCTCGGCCTTACAATATAACAACAAGTTTGAC 596

Query 580 CTCAAATCAGGTAGGATTACCCGCTGAACTTAAGCATATCAATAAGCGGAGGA 632
      |||
Sbjct 597 CTCAAATCAGGTAGGACTACCCGCTGAACTTAAGCATATCAATAAGCGGAGGA 649
```

>gb|AY040667.1| Candida psychrophila internal transcribed spacer 1, partial sequence;  
5.8S ribosomal RNA gene, complete sequence; and internal transcribed spacer 2, partial sequence  
Length=640

Score = 809 bits (438), Expect = 0.0  
Identities = 587/653 (89%), Gaps = 34/653 (5%)

Strand=Plus/Plus

```
Query 1 TCCGTAGGTGAACCTGCGGAAGGATCATTACTGTATTCTAATTGCCAGCGCTTAATTGCG 60
      |||
Sbjct 1 TCCGTAGGTGAACCTGCGGAAGGATCATTACAGTATTCTTTTGGCCAGCGCTTAATTGCG 60

Query 61 CGGCGATTAAACCTTACACACAATGTTTTTCT-TTATTA-GA-AACTATTGCTTTGGCT- 116
      |||
Sbjct 61 CGGCGAAAAAACCTTACACACAGTGTTTTT-TGTTATTACAAGAACTTTTGGCTTTGG-TC 118

Query 117 TGG-CTAAGAAATTAG-TCGGGCCAGAGGTTTAC---AC-AACTTCAATTTTTTA-ATTG 169
      |||
Sbjct 119 TGGACT-AGAAA-TAGTTTGGGCCAGAGGTTTACTAAACTAAACTTCAATATTTATATTG 176

Query 170 AATTGTTATTTAATACT--TTGTCAATTTGTTGATTAAATTCAAACAATCTTCAAACTT 227
      |||
Sbjct 177 AATTGTTATTT-ATTTAATTGTCAATTTGTTGATTAAATTCAAAAAATCTTCAAACTT 235

Query 228 TCAACAACGGATCTCTTGGTTCTCGCATCGATGAAGAACGCAGCGAAATGCGATAAGTAA 287
      |||
Sbjct 236 TCAACAACGGATCTCTTGGTTCTCGCATCGATGAAGAACGCAGCGAAATGCGATAAGTAA 295

Query 288 TATGAATTGCAGATTTTCGTGAATCATCGAATCTTTGAACGCACATTGCGCCCTCTGGTA 347
      |||
Sbjct 296 TATGAATTGCAGATTTTCGTGAATCATCGAATCTTTGAACGCACATTGCGCCCTCTGGTA 355

Query 348 TTCCAGAGGGCATGCCTGTTTGGAGCGTCATTTCTCTCTCAAACCTT-GGGTTTGGTATT 406
      |||
Sbjct 356 TTCCAGAGGGCATGCCTGTTTGGAGCGTCATTTCTCTCTCAAACC-TTCGGGTTTGGTATT 414

Query 407 GAGTGATACTCTTAGTCGAACTAGGCGTTTGCTTGAAATTTATTGGCATGAGTGACGCTG 466
      |||
Sbjct 415 GAGTGATACTCTTAGTCGAACTAGGCGTTTGCTTGAAATGTATTGGCATGAGTGGTACTG 474

Query 467 AGA-AGTGC-ATTCAGGAAATATCAATGTATTAGGTTTATCCAACCTCGTTGACA-ATTCT 523
      |||
Sbjct 475 -GATAGTGCTAT--ATGACTT-TCAATGTATTAGGTTTATCCAACCTCGTTGA-ATAGT-T 528

Query 524 TGGTTGTGA-ATTTTT-GGTGTT--AGGCTTTCCTTAAAAACAACAACAAGTTTGAC 579
      |||
Sbjct 529 TAATGGT-ATATTTCTCGGTATTCTAGGCTCGGCCTTACAATATAACAACAAGTTTGAC 587

Query 580 CTCAAATCAGGTAGGATTACCCGCTGAACTTAAGCATATCAATAAGCGGAGGA 632
      |||
Sbjct 588 CTCAAATCAGGTAGGACTACCCGCTGAACTTAAGCATATCAATAAGCGGAGGA 640
```

>gb|FJ172253.1| *Candida sinolaborantium* strain ATCC MYA-4337 18S ribosomal RNA gene, partial sequence; internal transcribed spacer 1, 5.8S ribosomal RNA gene, and internal transcribed spacer 2, complete sequence; and 26S ribosomal RNA gene, partial sequence  
Length=619

Score = 808 bits (437), Expect = 0.0  
Identities = 573/632 (90%), Gaps = 36/632 (5%)  
Strand=Plus/Plus

```
Query 1 TCCGTAGGTGAACCTGCGGAAGGATCATTACTGTATTCTAATTGCCAGCGCTTAATTGCG 60
      |||
Sbjct 11 TCCGTAGGTGAACCTGCGGAAGGATCATTACAGTATTCT-TTTGGCCAGCGCTTAATTGCG 69

Query 61 CGGCGATTAAACCTTACACACAATGTTTTTCT-TTATTAGAAACTATTGCTTTGGCTTGG 119
      |||
Sbjct 70 CGGCGA-AAAACCTTACACACAATGTTTTT-TGTT-TT--AAACCATTGCTTTGGCTTGG 124
```

```

Query 120 -CTAAGAAATTA-GTCGGGCCAGAGGTTTAC-AC-AAACTTCAATTTTAAATTGAATTGT 175
      || ||||| || || ||| ||||| ||||| ||||| ||||| ||||| ||||| ||||| |||||
Sbjct 125 CCT-AGAAA-TAGGTTGGGTCTAGAGGTTTACAACATAACTTCAATTTT-ATTGAATTGT 181

Query 176 TATTT-AA-TACTTTGTCAATTTGTTGATTAAATTCAAACAATCTTCAAACCTTTCAACA 233
      | ||| || || ||||| ||||| ||||| ||||| ||||| ||||| ||||| ||||| |||||
Sbjct 182 T-TTTAAATTA-TTTGTCAATTTGTTGATTAAATTCAAA-AATCTTCAAACCTTTCAACA 238

Query 234 ACGGATCTCTTGGTTCTCGCATCGATGAAGAACGCAGCGAAATGCGATAAGTAATATGAA 293
      ||||| ||||| ||||| ||||| ||||| ||||| ||||| ||||| ||||| ||||| |||||
Sbjct 239 ACGGATCTCTTGGTTCTCGCATCGATGAAGAACGCAGCGAAATGCGATAAGTAATATGAA 298

Query 294 TTGCAGATTTTTCGTGAATCATCGAATCTTTGAACGCACATTGCGCCCTCTGGTATTCCAG 353
      ||||| ||||| ||||| ||||| ||||| ||||| ||||| ||||| ||||| ||||| |||||
Sbjct 299 TTGCAGATTTTTCGTGAATCATCGAATCTTTGAACGCACATTGCGCCCTTTGGTATTCCAA 358

Query 354 AGGGCATGCCTGTTTGAGCGTCATTTCTCTCTCAAACCCTTGGGTTTGGTATTGAGTGAT 413
      ||||| ||||| ||||| ||||| ||||| ||||| ||||| ||||| ||||| ||||| |||||
Sbjct 359 AGGGCATGCCTGTTTGAGCGTCATTTCTCTCTCAAACCCTCGGGTTTGGTATTGAGTGAT 418

Query 414 ACTCTTAGTCGAACTAGGCGTTTGCTTGAAATTTATTGGCATGAGTG-ACGCTGAGA-AG 471
      ||||| ||||| ||||| ||||| ||||| ||||| ||||| ||||| || || || ||
Sbjct 419 ACTCTTAGTCGGACTAGGCGTTTGCTTGAAAAGTATTGGCATGAGTGAC--TG-GATAG 475

Query 472 TGCATTGAGGAAATAT-CAATGTATTAGGTTTATCCAACCTCGTTGACA--ATTCTTGGTT 528
      | | ||| | | ||| ||||| ||||| ||||| ||||| ||||| || || | |||
Sbjct 476 TACGTTCTG-AT-TATTCAATGTATTAGGTTTATCCAACCTCGTTGA-AGGAT-CA-GGT- 529

Query 529 GTGAATTTTGGTGT-TAGGCTTTGCCTTAAAAACAACAACAAGTTTGACCTCAAATC 587
      || ||||| ||||| | |||| ||||| || ||||| ||||| ||||| ||||| |||||
Sbjct 530 GTAAATTTCTGGTGTATTGGCTCGGCCTTACAA--CAACAACAAGTTTGACCTCAAATC 587

Query 588 AGGTAGGATTACCCGCTGAACTTAAGCATATC 619
      ||||| ||||| ||||| ||||| ||||| ||||| ||||| ||||| |||||
Sbjct 588 AGGTAGGATTACCCGCTGAACTTAAGCATATC 619

```

>gb|EF198011.1| Debaryomyces pseudopolymorphus strain WC43-3 18S ribosomal RNA gene, partial sequence; internal transcribed spacer 1, 5.8S ribosomal RNA gene, and internal transcribed spacer 2, complete sequence; and 28S ribosomal RNA gene, partial sequence  
Length=644

Score = 808 bits (437), Expect = 0.0  
Identities = 577/639 (90%), Gaps = 31/639 (4%)  
Strand=Plus/Plus

```

Query 1 TCCGTAGGTGAACCTGCGGAAGGATCATTACTGTATTCTAATTGCCAGCGCTTAATTGCG 60
      ||||| ||||| ||||| ||||| ||||| ||||| ||||| ||||| ||||| ||||| |||||
Sbjct 17 TCCGTAGGTGAACCTGCGGAAGGATCATTACAGTATTCTTTTGGCAGCGCTTAATTGCG 76

Query 61 CGGCGATTAAACCTTACACACAATGTTTTTCT-TTATTA-GA-AACTATTGCTTTGGCT- 116
      ||||| ||||| ||||| ||||| ||||| ||||| ||||| ||||| ||||| ||||| |||||
Sbjct 77 CGGCGAAAAACCTTACACACTATGTTTTT-TGTTATTACAAGAACTATTGCTTTGG-TC 134

Query 117 TGGCT-AAGAAATTAG--TCGGGCCAGAGGTTTACAC-AAACTTCAATTTTAA-ATTGAA 171
      || || ||||| ||| | ||||| ||||| ||||| ||||| ||||| ||||| |||||
Sbjct 135 TGTCTCTAGAAA-TAGATTTGGGCCAGAGGTTTA-ACTAAACTTCAA-TTTTATATTGAA 191

Query 172 TTGTTATTTAA--TACTTTGTCAATTTGTTGATTAAATTCAAACAATCTTCAAACCTTTC 229
      ||||| ||||| || ||||| ||||| ||||| ||||| ||||| ||||| ||||| |||||
Sbjct 192 TTGTT-TTTAATTTA-ATTGTCAATTTGTTGATTAAATTTCAAAAAATCTTCAAACCTTTC 249

```

```

Query 230 AACACGGATCTCTTGGTTCTCGCATCGATGAAGAACGCAGCGAAATGCGATAAGTAATA 289
          |||
Sbjct 250 AACACGGATCTCTTGGTTCTCGCATCGATGAAGAACGCAGCGAAATGCGATAAGTAATA 309

Query 290 TGAATTGCAGATTTTCGTGAATCATCGAATCTTTGAACGCACATTGCGCCCTCTGGTATT 349
          |||
Sbjct 310 TGAATTGCAGATTTTCGTGAATCATCGAATCTTTGAACGCACATTGCGCCCTCTGGTATT 369

Query 350 CCAGAGGGCATGCCTGTTTGAGCGTCATTTCTCTCTCAAACCCCTGGGTTTGGTATTGAG 409
          |||
Sbjct 370 CCAGAGGGCATGCCTGTTTGAGCGTCATTTCTCTCTCAAACCCCTGGGTTTGGTATTGAG 429

Query 410 TGATACTCTTAGTCGAACTAGGCGTTTGCTTGAATTTATTGGCATGAGT-G-ACGCTGA 467
          |||
Sbjct 430 TGATACTCTTAGTCGAACTAGGCGTTTGCTTGAATGTATCGGCATGAGTAGTAC--TGA 487

Query 468 GA-AGTGCATTTCAGGAAATAT-CAATGTATTAGGTTTATCCAACCTCGTTGACAATTCTTG 525
          | |||
Sbjct 488 -ATAGTGC-TTCAAGACTTTTTCAATGTATTAGGTTTATCCAACCTCGTTGA-A-TGGTTT 543

Query 526 -GTTGTGAATTTTGGTGTTA--GGCTTTGCCTTAAAAACAACAACAAGTTTGACCTC 582
          || ||
Sbjct 544 AGTAGTAAATTTTAGTATTATTGGCTCGGCCTTACAACACAACAACAAGTTTGACCTC 603

Query 583 AAATCAGGTAGGATTACCCGCTGAACTTAAGCATATCAA 621
          |||
Sbjct 604 AAATCAGGTAGGACTACCCGCTGAACTTAAGCATATCAA 642

```

>gb|EF222225.1| *Debaryomyces hansenii* strain gaolhou2 18S ribosomal RNA gene, partial sequence; internal transcribed spacer 1, 5.8S ribosomal RNA gene, and internal transcribed spacer 2, complete sequence; and 28S ribosomal RNA gene, partial sequence  
Length=658

Score = 804 bits (435), Expect = 0.0  
Identities = 580/644 (90%), Gaps = 33/644 (5%)  
Strand=Plus/Plus

```

Query 1 TCCGTAGGTGAACCTGCGGAAGGATCATTACTGTATTCTAATTGCCAGCGCTTAATTGCG 60
          |||
Sbjct 28 TCCGTAGGTGAACCTGCGGAAGGATCATTACAGTATTCTTTTGGCAGCGCTTAATTGCG 87

Query 61 CGGCGATTAAACCTTACACACAATGTTTTTCT-TTATTA-GA-AACTATTGCTTTGGCT- 116
          |||
Sbjct 88 CGGCGAAAAAACCTTACACACAGTGTTTTT-TGTTATTACAAGAACTTTGCTTTGG-TC 145

Query 117 TGG-CTAAGAAATTAG-TCGGGCCAGAGGTTTAC---AC-AACTTCAATTTTTTA-ATTG 169
          |||
Sbjct 146 TGGACT-AGAAA-TAGTTTGGGCCAGAGGTTTACTGAACTAAACTTCAATATTTATATTG 203

Query 170 AATTGTTATTTA-ATACTTTGTCAATTTGTTGATTAAATTCAAACAATCTTCAAACCTTT 228
          |||
Sbjct 204 AATTGTTATTTATTTA-ATTGTCAATTTGTTGATTAAATTCAAAAAATCTTCAAACCTTT 262

Query 229 CAACAACGGATCTCTTGGTTCTCGCATCGATGAAGAACGCAGCGAAATGCGATAAGTAAT 288
          |||
Sbjct 263 CAACAACGGATCTCTTGGTTCTCGCATCGATGAAGAACGCAGCGAAATGCGATAAGTAAT 322

Query 289 ATGAATTGCAGATTTTCGTGAATCATCGAATCTTTGAACGCACATTGCGCCCTCTGGTAT 348
          |||
Sbjct 323 ATGAATTGCAGATTTTCGTGAATCATCGAATCTTTGAACGCACATTGCGCCCTCTGGTAT 382

Query 349 TCCAGAGGGCATGCCTGTTTGAGCGTCATTTCTCTCTCAAACCCCTT-GGGTTTGGTATTG 407

```







>gb|EF197815.1| *Debaryomyces hansenii* strain GAO2 18S ribosomal RNA gene, partial sequence; internal transcribed spacer 1, 5.8S ribosomal RNA gene, and internal transcribed spacer 2, complete sequence; and 28S ribosomal RNA gene, partial sequence  
Length=657

Score = 802 bits (434), Expect = 0.0  
Identities = 579/643 (90%), Gaps = 33/643 (5%)  
Strand=Plus/Plus

```
Query 1 TCCGTAGGTGAACCTGCGGAAGGATCATTACTGTATTCTAATTGCCAGCGCTTAATTGCG 60
      |||
Sbjct 28 TCCGTAGGTGAACCTGCGGAAGGATCATTACAGTATTCTTTTGGCCAGCGCTTAATTGCG 87

Query 61 CGGCGATTAAACCTTACACACAATGTTTTTCT-TTATTA-GA-AACTATTGCTTTGGCT- 116
      |||
Sbjct 88 CGGCGAAAAAACCTTACACACAGTGTTTTT-TGTTATTACAAGAACTTTTGGCTTTGG-TC 145

Query 117 TGG-CTAAGAAATTAG-TCGGGCCAGAGGTTTAC---AC-AACTTCAATTTTTTA-ATTG 169
      |||
Sbjct 146 TGGACT-AGAAA-TAGTTTGGGCCAGAGGTTTACTGAACTAAACTTCAATATTTATATTG 203

Query 170 AATTGTTATTTA-ATACTTTGTCAATTTGTTGATTAAATTCAAACAATCTTCAAACCTTT 228
      |||
Sbjct 204 AATTGTTATTTATTTA-ATTGTCAATTTGTTGATTAAATTCAAAAAATCTTCAAACCTTT 262

Query 229 CAACAACGGATCTCTTGGTTCTCGCATCGATGAAGAACGCAGCGAAAATGCGATAAGTAAT 288
      |||
Sbjct 263 CAACAACGGATCTCTTGGTTCTCGCATCGATGAAGAACGCAGCGAAAATGCGATAAGTAAT 322

Query 289 ATGAATTGCAGATTTTCGTGAATCATCGAATCTTTGAACGCACATTGCGCCCTCTGGTAT 348
      |||
Sbjct 323 ATGAATTGCAGATTTTCGTGAATCATCGAATCTTTGAACGCACATTGCGCCCTCTGGTAT 382

Query 349 TCCAGAGGGCATGCCTGTTTGAGCGTCATTTCTCTCTCAAACCCTT-GGGTTTGGTATTG 407
      |||
Sbjct 383 TCCAGAGGGCATGCCTGTTTGAGCGTCATTTCTCTCTCAAACC-TTCGGGTTTGGTATTG 441

Query 408 AGTGATACTCTTAGTCGAACTAGGCGTTTGCTTGAAATTTATTGGCATGAGTGACGCTGA 467
      |||
Sbjct 442 AGTGATACTCTTAGTCGAACTAGGCGTTTGCTTGAAATGTATTGGCATGAGTGGTACTG- 500

Query 468 GA-AGTGC-ATTCAGGAAATATCAATGTATTAGGTTTATCCAACCTCGTTGACA-ATTCTT 524
      |||
Sbjct 501 GATAGTGCTAT--ATGACTT-TCAATGTATTAGGTTTATCCAACCTCGTTGA-ATAGT-TT 555

Query 525 GGTGTGA-ATTTTT-GGTGTT--AGGCTTGCCTTAAAAACAACAACAAGTTTGACC 580
      |||
Sbjct 556 AATGGT-ATATTTCTCGGTATTCTAGGCTCGGCCTTACAATATAACAACAAGTTTGACC 614

Query 581 TCAAATCAGGTAGGATTACCCGCTGAACTTAAGCATATCAATA 623
      |||
Sbjct 615 TCAAATCAGGTAGGATTACCCGCTGAACTTAAGCATATCAATA 657
```

>gb|EF643596.1| *Debaryomyces hansenii* strain LN-5 18S ribosomal RNA gene, partial sequence; internal transcribed spacer 1, 5.8S ribosomal RNA gene, and internal transcribed spacer 2, complete sequence; and 28S ribosomal RNA gene, partial sequence  
Length=669

Score = 800 bits (433), Expect = 0.0

Identities = 578/642 (90%), Gaps = 33/642 (5%)  
Strand=Plus/Plus

```
Query 1 TCCGTAGGTGAACCTGCGGAAGGATCATTACTGTATTCTAATTGCCAGCGCTTAATTGCG 60
      |||
Sbjct 29 TCCGTAGGTGAACCTGCGGAAGGATCATTACAGTATTCTTTTTGCCAGCGCTTAATTGCG 88

Query 61 CGGCGATTAAACCTTACACACAATGTTTTTCT-TTATTA-GA-AACTATTGCTTTGGCT- 116
      |||
Sbjct 89 CGGCGAAAAAACCTTACACACAGTGTTTTT-TGTTATTACAAGAACTTTTGGCTTTGG-TC 146

Query 117 TGG-CTAAGAAATTAG-TCGGGCCAGAGGTTTAC---AC-AACTTCAATTTTTTA-ATTG 169
      |||
Sbjct 147 TGGACT-AGAAA-TAGTTTGGGCCAGAGGTTTACTGAACTAAACTTCAATATTTATATTG 204

Query 170 AATTGTTATTTA-ATACTTTGTCAATTTGTTGATTAAATTCAAACAATCTTCAAACCTTT 228
      |||
Sbjct 205 AATTGTTATTTATTTA-ATTGTCAATTTGTTGATTAAATTCAAAAAATCTTCAAACCTTT 263

Query 229 CAACAACGGATCTCTTGGTTCTCGCATCGATGAAGAACGCAGCGAAATGCGATAAGTAAT 288
      |||
Sbjct 264 CAACAACGGATCTCTTGGTTCTCGCATCGATGAAGAACGCAGCGAAATGCGATAAGTAAT 323

Query 289 ATGAATTGCAGATTTTCGTGAATCATCGAATCTTTGAACGCACATTGCGCCCTCTGGTAT 348
      |||
Sbjct 324 ATGAATTGCAGATTTTCGTGAATCATCGAATCTTTGAACGCACATTGCGCCCTCTGGTAT 383

Query 349 TCCAGAGGGCATGCCTGTTTGAGCGTCATTTCTCTCTCAAACCTT-GGGTTTGGTATTG 407
      |||
Sbjct 384 TCCAGAGGGCATGCCTGTTTGAGCGTCATTTCTCTCTCAAACC-TTCGGGTTTGGTATTG 442

Query 408 AGTGATACTCTTAGTCGAACTAGGCGTTTGCTTGAAATTTATTGGCATGAGTGACGCTGA 467
      |||
Sbjct 443 AGTGATACTCTTAGTCGAACTAGGCGTTTGCTTGAAATGTATTGGCATGAGTGGTACTG- 501

Query 468 GA-AGTGC-ATTCAGGAAATATCAATGTATTAGGTTTATCCAACCTCGTTGACA-ATTCTT 524
      |||
Sbjct 502 GATAGTGCTAT--ATGACTT-TCAATGTATTAGGTTTATCCAACCTCGTTGA-ATAGT-TT 556

Query 525 GGTGTGA-ATTTTT-GGTGTT--AGGCTTGCCTTAAAAACAACAAACAAGTTTGACC 580
      |||
Sbjct 557 AATGGT-ATATTTCTCGGTATTCTAGGCTCGGCCTTACAATATAACAAACAAGTTTGACC 615

Query 581 TCAAATCAGGTAGGATTACCCGCTGAACTTAAGCATATCAAT 622
      |||
Sbjct 616 TCAAATCAGGTAGGATTACCCGCTGAACTTAAGCATATCAAT 657
```

>gb|EF643588.1| *Debaryomyces hansenii* strain LN-2 18S ribosomal RNA gene, partial sequence; internal transcribed spacer 1, 5.8S ribosomal RNA gene, and internal transcribed spacer 2, complete sequence; and 28S ribosomal RNA gene, partial sequence  
Length=674

Score = 800 bits (433), Expect = 0.0  
Identities = 583/649 (89%), Gaps = 35/649 (5%)  
Strand=Plus/Plus

```
Query 1 TCCGTAGGTGAACCTGCGGAAGGATCATTACTGTATTCTAATTGCCAGCGCTTAATTGCG 60
      |||
Sbjct 29 TCCGTAGGTGAACCTGCGGAAGGATCATTACAGTATTCTTTTTGCCAGCGCTTAATTGCG 88

Query 61 CGGCGATTAAACCTTACACACAATGTTTTTCT-TTATTA-GA-AACTATTGCTTTGGCT- 116
      |||
```

|       |     |                                                               |     |
|-------|-----|---------------------------------------------------------------|-----|
| Sbjct | 89  | CGGCGAAAAACCTTACACACAGTGTTTTT-TGTTATTACAAGAACTTTTGCTTTGG-TC   | 146 |
| Query | 117 | TGG-CTAAGAAATTAG-TCGGGCCAGAGGTTTAC---AC-AACTTCAATTTTTTA-ATTG  | 169 |
| Sbjct | 147 | TGGACT-AGAAA-TAGTTTGGGCCAGAGGTTTACTGAACTAAACTTCAATATTTATATTG  | 204 |
| Query | 170 | AATTGTTATTTA-ATACTTTGTCAATTTGTTGATTAAATTCAAACAATCTTCAAACCTTT  | 228 |
| Sbjct | 205 | AATTGTTATTTATTTA-ATTGTCAATTTGTTGATTAAATTCAAAAAATCTTCAAACCTTT  | 263 |
| Query | 229 | CAACAACGGATCTCTTGGTTCTCGCATCGATGAAGAACGCAGCGAAATGCGATAAGTAAT  | 288 |
| Sbjct | 264 | CAACAACGGATCTCTTGGTTCTCGCATCGATGAAGAACGCAGCGAAATGCGATAAGTAAT  | 323 |
| Query | 289 | ATGAATTGCAGATTTTCGTGAATCATCGAATCTTTGAACGCACATTGCGCCCTCTGGTAT  | 348 |
| Sbjct | 324 | ATGAATTGCAGATTTTCGTGAATCATCGAATCTTTGAACGCACATTGCGCCCTCTGGTAT  | 383 |
| Query | 349 | TCCAGAGGGCATGCCTGTTTGAGCGTCATTTCTCTCTCAAACCTT-GGGTTTGGTATTG   | 407 |
| Sbjct | 384 | TCCAGAGGGCATGCCTGTTTGAGCGTCATTTCTCTCTCAAACC-TTCGGGTTTGGTATTG  | 442 |
| Query | 408 | AGTGATACTCTTAGTTCGAACTAGGCGTTTGCTTGAAATTTATTGGCATGAGTGACGCTGA | 467 |
| Sbjct | 443 | AGTGATACTCTTAGTTCGAACTAGGCGTTTGCTTGAAATGTATTGGCATGAGTGGTACTG- | 501 |
| Query | 468 | GA-AGTGC-ATTCAGGAAATATCAATGTATTAGGTTTATCCAACCTCGTTGACA-ATTCTT | 524 |
| Sbjct | 502 | GATAGTGCTAT--ATGACTT-TCAATGTATTAGGTTTATCCAACCTCGTTGA-ATAGT-TT | 556 |
| Query | 525 | GGTTGTGA-ATTTTT-GGTGTT--AGGCTTTGCCTTAAAAAACAACAACAAGTTTGACC   | 580 |
| Sbjct | 557 | AATGGT-ATATTTCTCGGTATTCTAGGCTCGGCCTTACAATATAACAACAAGTTTGACC   | 615 |
| Query | 581 | TCAAATCAGGTAGGATTACCCGCTGAACTTAAGCATATCAATAA-GCGG             | 628 |
| Sbjct | 616 | TCAAATCAGGTAGGATTACCCGCTGAACTTAAGCATATCA-TAAAGCGG             | 663 |

>dbj|AB220029.1| *Debaryomyces nepalensis* genes for 18S rRNA, ITS1, 5.8S rRNA, ITS2, 26S rRNA, partial sequence, strain: IFM 54258  
Length=649

Score = 798 bits (432), Expect = 0.0  
Identities = 585/653 (89%), Gaps = 34/653 (5%)  
Strand=Plus/Plus

|       |     |                                                              |     |
|-------|-----|--------------------------------------------------------------|-----|
| Query | 1   | TCCGTAGGTGAACCTGCGGAAGGATCATTACTGTATTCTAATTGCCAGCGCTTAATTGCG | 60  |
| Sbjct | 10  | TCCGTAGGTGAACCTGCGGAAGGATCATTACAGTATTCTTTTGGCCAGCGCTTAATTGCG | 69  |
| Query | 61  | CGGCGATTAAACCTTACACACAATGTTTTTCT-TTATTA-GA-AACTATTGCTTTGGCT- | 116 |
| Sbjct | 70  | CGGCGAAAAACCTTACACACAGTGTTTTT-TGTTATTACAAGAACTTTGCTTTGG-TC   | 127 |
| Query | 117 | TGG-CTAAGAAATTAG-TCGGGCCAGAGGTTTAC---AC-AACTTCAATTTTTTA-ATTG | 169 |
| Sbjct | 128 | TGGACT-AGAAA-TAGTTTGGGCCAGAGGTTTACTAAACTAAACTTCAATATTTATATTG | 185 |
| Query | 170 | AATTGTTATTTAATACT--TTGTCAATTTGTTGATTAAATTCAAACAATCTTCAAACCTT | 227 |
| Sbjct | 186 | AATTGTTATTT-ATTTTAATTGTCAATTTGTTGATTAAATTCAAAAAATCTTCAAACCTT | 244 |
| Query | 228 | TCAACAACGGATCTCTTGGTTCTCGCATCGATGAAGAACGCAGCGAAATGCGATAAGTAA | 287 |

|       |     |                                                                   |     |
|-------|-----|-------------------------------------------------------------------|-----|
| Sbjct | 245 | <br>TCAACAACGGATCTCTTGGTTCTCGCATCGATGAAGAACGCAGCGAAATGCGATAAGTAA  | 304 |
| Query | 288 | TATGAATTGCAGATTTTCGTGAATCATCGAATCTTTGAACGCACATTGCGCCCTCTGGTA      | 347 |
| Sbjct | 305 | <br>TATGAATTGCAGATTTTCGTGAATCATCGAATCTTTGAACGCACATTGCGCCCTTTGGTA  | 364 |
| Query | 348 | TTCCAGAGGGCATGCCTGTTTGAGCGTCATTTCTCTCTCAAACCCCTT-GGGTTTGGTATT     | 406 |
| Sbjct | 365 | <br>TTCCAAAGGGCATGCCTGTTTGAGCGTCATTTCTCTCTCAAACC-TTCGGGTTTGGTATT  | 423 |
| Query | 407 | GAGTGATACTCTTAGTTCGAACTAGGCGTTTGCTTGAATTTATTGGCATGAGTGACGCTG      | 466 |
| Sbjct | 424 | <br>GAGTGATACTCTTAGTTCGAACTAGGCGTTTGCTTGAATGTATTGGCATGAGTGGTACTG  | 483 |
| Query | 467 | AGA-AGTGC-ATTCAGGAAATATCAATGTATTAGGTTTATCCAACCTCGTTGACA-ATTCT     | 523 |
| Sbjct | 484 | <br>-GATAGTGCTAT--ATGACTT-TCAATGTATTAGGTTTATCCAACCTCGTTGA-ATAGT-T | 537 |
| Query | 524 | TGGTTGTGA-ATTTT-GGTGTT--AGGCTTTCCTTAAAAACAACAAACAAGTTTGAC         | 579 |
| Sbjct | 538 | <br>TAATGGT-ATATTTCTCGGTATTCTAGGCTCGGCCTTACAATATAACAAACAAGTTTGAC  | 596 |
| Query | 580 | CTCAAATCAGGTAGGATTACCCGCTGAACTTAAGCATATCAATAAGCGGAGGA             | 632 |
| Sbjct | 597 | <br>CTCAAATCAGGTAGGACTACCCGCTGAACTTAAGCATATCAATAAGCGGAGGA         | 649 |

>dbj|AB220028.1| *Debaryomyces nepalensis* genes for 18S rRNA, ITS1, 5.8S rRNA, ITS2, 26S rRNA, partial sequence, strain: IFM 54257  
Length=649

Score = 798 bits (432), Expect = 0.0  
Identities = 585/653 (89%), Gaps = 34/653 (5%)  
Strand=Plus/Plus

|       |     |                                                                  |     |
|-------|-----|------------------------------------------------------------------|-----|
| Query | 1   | TCCGTAGGTGAACCTGCGGAAGGATCATTACTGTATTCTAATTGCCAGCGCTTAATTGCG     | 60  |
| Sbjct | 10  | <br>TCCGTAGGTGAACCTGCGGAAGGATCATTACAGTATTCTTTTGGCCAGCGCTTAATTGCG | 69  |
| Query | 61  | CGGCGATTAAACCTTACACACAATGTTTTTCT-TTATTA-GA-AACTATTGCTTTGGCT-     | 116 |
| Sbjct | 70  | <br>CGGCGAAAAACCTTACACACAGTGTTTTT-TGTTATTACAAGAACTCTTGCTTTGG-TC  | 127 |
| Query | 117 | TGG-CTAAGAAATTAG-TCGGGCCAGAGGTTTAC---AC-AACTTCAATTTTTTA-ATTG     | 169 |
| Sbjct | 128 | <br>TGGACT-AGAAA-TAGTTTGGGCCAGAGGTTTACTAACTAACTTCAATATTTATATTG   | 185 |
| Query | 170 | AATTGTTATTTAATACT--TTGTCAATTTGTTGATTAAATTCAAACAATCTTCAAACCTT     | 227 |
| Sbjct | 186 | <br>AATTGTTATTT-ATTTTAATTGTCAATTTGTTGATTAAATTCAAAAAATCTTCAAACCTT | 244 |
| Query | 228 | TCAACAACGGATCTCTTGGTTCTCGCATCGATGAAGAACGCAGCGAAATGCGATAAGTAA     | 287 |
| Sbjct | 245 | <br>TCAACAACGGATCTCTTGGTTCTCGCATCGATGAAGAACGCAGCGAAATGCGATAAGTAA | 304 |
| Query | 288 | TATGAATTGCAGATTTTCGTGAATCATCGAATCTTTGAACGCACATTGCGCCCTCTGGTA     | 347 |
| Sbjct | 305 | <br>TATGAATTGCAGATTTTCGTGAATCATCGAATCTTTGAACGCACATTGCGCCCTTTGGTA | 364 |
| Query | 348 | TTCCAGAGGGCATGCCTGTTTGAGCGTCATTTCTCTCTCAAACCCCTT-GGGTTTGGTATT    | 406 |
| Sbjct | 365 | <br>TTCCAAAGGGCATGCCTGTTTGAGCGTCATTTCTCTCTCAAACC-TTCGGGTTTGGTATT | 423 |

```

Query 407 GAGTGATACTCTTAGTCGAACTAGGCGTTTGCTTGAAATTTATTGGCATGAGTGACGCTG 466
          |||||||||||||||||||||||||||||||||||||||||||||||||||||||||
Sbjct 424 GAGTGATACTCTTAGTCGAACTAGGCGTTTGCTTGAAATGTATTGGCATGAGTGGTACTG 483

Query 467 AGA-AGTGC-ATTCAGGAAATATCAATGTATTAGGTTTATCCAACCTCGTTGACA-ATTCT 523
          || ||||| || | || | ||||||||||||||||||||||||||||||||| | | | |
Sbjct 484 -GATAGTGCTAT--ATGACTT-TCAATGTATTAGGTTTATCCAACCTCGTTGA-ATAGT-T 537

Query 524 TGGTTGTGA-ATTTTT-GGTGTT--AGGCTTTGCCTTAAAAACAACAAACAAGTTTGAC 579
          | | | | | |||| | || | | ||||| ||||| | | | |||||||||||||||||
Sbjct 538 TAATGGT-ATATTTCTCGGTATTCTAGGCTCGGCCTTACAATATAACAAACAAGTTTGAC 596

Query 580 CTCAAATCAGGTAGGATTACCCGCTGAACTTAAGCATATCAATAAGCGGAGGA 632
          ||||||||||||||||| |||||||||||||||||||||||||||||||||
Sbjct 597 CTCAAATCAGGTAGGACTACCCGCTGAACTTAAGCATATCAATAAGCGGAGGA 649

```

>gb|EF192232.1| Debaryomyces hansenii strain shi2wei 18S ribosomal RNA gene, partial sequence; internal transcribed spacer 1, 5.8S ribosomal RNA gene, and internal transcribed spacer 2, complete sequence; and 28S ribosomal RNA gene, partial sequence  
Length=646

Score = 798 bits (432), Expect = 0.0  
Identities = 577/641 (90%), Gaps = 33/641 (5%)  
Strand=Plus/Plus

```

Query 1 TCCGTAGGTGAACCTGCGGAAGGATCATTACTGTATTCTAATTGCCAGCGCTTAATTGCG 60
          |||||||||||||||||||||||||||||||||||||||||||||||||||||||||
Sbjct 18 TCCGTAGGTGAACCTGCGGAAGGATCATTACAGTATTCTTTTTGCCAGCGCTTAATTGCG 77

Query 61 CGGCGATTAAACCTTACACACAATGTTTTTCT-TTATTA-GA-AACTATTGCTTTGGCT- 116
          ||||| ||||||||||||||||||||||| ||||| | ||||| ||||| |
Sbjct 78 CGGCGAAAAAACCTTACACACAGTGTTTTT-TGTTATTACAAGAACTTTTGGCTTTGG-TC 135

Query 117 TGG-CTAAGAAATTAG-TCGGGCCAGAGGTTTAC---AC-AACTTCAATTTTTTA-ATTG 169
          ||| | | ||||| || | ||||||||||||||||||| || ||||||| |||||
Sbjct 136 TGGACT-AGAAA-TAGTTTGGGCCAGAGGTTTACTGAACTAACTTCAATATTTATATTG 193

Query 170 AATTGTTATTTA-ATACTTTGTCAATTTGTTGATTAAATTCAAACAATCTTCAAACCTTT 228
          ||||||||||||| || ||||||||||||||||||| ||||| ||||| |||||
Sbjct 194 AATTGTTATTTATTTA-ATTGTCAATTTGTTGATTAAATTCAAAAAATCTTCAAACCTTT 252

Query 229 CAACAACGGATCTCTTGGTTCTCGCATCGATGAAGAACGCAGCGAAATGCGATAAGTAAT 288
          |||||||||||||||||||||||||||||||||||||||||||||||||||||||||
Sbjct 253 CAACAACGGATCTCTTGGTTCTCGCATCGATGAAGAACGCAGCGAAATGCGATAAGTAAT 312

Query 289 ATGAATTGCAGATTTTCGTGAATCATCGAATCTTTGAACGCACATTGCGCCCTCTGGTAT 348
          |||||||||||||||||||||||||||||||||||||||||||||||||||||||||
Sbjct 313 ATGAATTGCAGATTTTCGTGAATCATCGAATCTTTGAACGCACATTGCGCCCTCTGGTAT 372

Query 349 TCCAGAGGGCATGCCTGTTTGAGCGTCATTTCTCTCTCAAACCCTT-GGGTTTGGTATTG 407
          |||||||||||||||||||||||||||||||||||||||||||||||||||||||||
Sbjct 373 TCCAGAGGGCATGCCTGTTTGAGCGTCATTTCTCTCTCAAACC-TTCGGTTTGGTATTG 431

Query 408 AGTGATACTCTTAGTCGAACTAGGCGTTTGCTTGAAATTTATTGGCATGAGTGACGCTGA 467
          |||||||||||||||||||||||||||||||||||||||||||||||||||||||||
Sbjct 432 AGTGATACTCTTAGTCGAACTAGGCGTTTGCTTGAAATGTATTGGCATGAGTGGTACTG- 490

Query 468 GA-AGTGC-ATTCAGGAAATATCAATGTATTAGGTTTATCCAACCTCGTTGACA-ATTCTT 524
          || ||||| || | || | ||||||||||||||||||||||||||||||||| | | | |
Sbjct 491 GATAGTGCTAT--ATGACTT-TCAATGTATTAGGTTTATCCAACCTCGTTGA-ATAGT-TT 545

Query 525 GGTTGTGA-ATTTTT-GGTGTT--AGGCTTTGCCTTAAAAACAACAAACAAGTTTGACC 580

```



partial sequence; internal transcribed spacer 1, 5.8S ribosomal RNA gene, and internal transcribed spacer 2, complete sequence; and 28S ribosomal RNA gene, partial sequence  
Length=673

Score = 798 bits (432), Expect = 0.0  
Identities = 577/641 (90%), Gaps = 33/641 (5%)  
Strand=Plus/Plus

```
Query 1 TCCGTAGGTGAACCTGCGGAAGGATCATTACTGTATTCTAATTGCCAGCGCTTAATTGCG 60
      |||
Sbjct 32 TCCGTAGGTGAACCTGCGGAAGGATCATTACAGTATTCTTTTGGCCAGCGCTTAATTGCG 91

Query 61 CGGCGATTAAACCTTACACACAATGTTTTTCT-TTATTA-GA-AACTATTGCTTTGGCT- 116
      |||
Sbjct 92 CGGCGAAAAAACCTTACACACAGTGTTTTT-TGTTATTACAAGAACTTTTGCTTTGG-TC 149

Query 117 TGG-CTAAGAAATTAG-TCGGGCCAGAGGTTTAC---AC-AACTTCAATTTTTA-ATTG 169
      |||
Sbjct 150 TGGACT-AGAAA-TAGTTTGGGCCAGAGGTTTACTGAACTAAACTTCAATATTTATATTG 207

Query 170 AATTGTTATTTA-ATACTTTGTCAATTTGTTGATTAAATTCAAACAATCTTCAAACCTTT 228
      |||
Sbjct 208 AATTGTTATTTATTTA-ATTGTCAATTTGTTGATTAAATTCAAAAAATCTTCAAACCTTT 266

Query 229 CAACAACGGATCTCTTGGTTCTCGCATCGATGAAGAACGCAGCGAAAATGCGATAAGTAAT 288
      |||
Sbjct 267 CAACAACGGATCTCTTGGTTCTCGCATCGATGAAGAACGCAGCGAAAATGCGATAAGTAAT 326

Query 289 ATGAATTGCAGATTTTCGTGAATCATCGAATCTTTGAACGCACATTGCGCCCTCTGGTAT 348
      |||
Sbjct 327 ATGAATTGCAGATTTTCGTGAATCATCGAATCTTTGAACGCACATTGCGCCCTCTGGTAT 386

Query 349 TCCAGAGGGCATGCCTGTTTGAGCGTCATTTCTCTCTCAAACCTT-GGGTTTGGTATTG 407
      |||
Sbjct 387 TCCAGAGGGCATGCCTGTTTGAGCGTCATTTCTCTCTCAAACC-TTCGGGTTTGGTATTG 445

Query 408 AGTGATACTCTTAGTCGAACTAGGCGTTTGCTTGAATTTATTGGCATGAGTGACGCTGA 467
      |||
Sbjct 446 AGTGATACTCTTAGTCGAACTAGGCGTTTGCTTGAATGTATTGGCATGAGTGGTACTG- 504

Query 468 GA-AGTGC-ATTCAGGAAATATCAATGTATTAGGTTTATCCAACCTCGTTGACA-ATTCTT 524
      |||
Sbjct 505 GATAGTGCTAT--ATGACTT-TCAATGTATTAGGTTTATCCAACCTCGTTGA-ATAGT-TT 559

Query 525 GGTTGTGA-ATTTTT-GGTGTT--AGGCTTGCCTTAAAAACAACAACAAGTTTGACC 580
      |||
Sbjct 560 AATGGT-ATATTCTCGGTATTCTAGGCTCGGCCTTACAATATAACAACAAGTTTGACC 618

Query 581 TCAAATCAGGTAGGATTACCCGCTGAACTTAAGCATATCAA 621
      |||
Sbjct 619 TCAAATCAGGTAGGATTACCCGCTGAACTTAAGCATATCAA 659
```

>gb|EF222227.1| *Debaryomyces hansenii* strain gaoyandie zhongchang 18S ribosomal RNA gene, partial sequence; internal transcribed spacer 1, 5.8S ribosomal RNA gene, and internal transcribed spacer 2, complete sequence; and 28S ribosomal RNA gene, partial sequence  
Length=656

Score = 797 bits (431), Expect = 0.0  
Identities = 576/640 (90%), Gaps = 33/640 (5%)  
Strand=Plus/Plus



```

Query 1 TCCGTAGGTGAACCTGCGGAAGGATCATTACTGTATTCTAATTGCCAGCGCTTAATTGCG 60
      |||
Sbjct 28 TCCGTAGGTGAACCTGCGGAAGGATCATTACAGTATTCTTTTGGCAGCGCTTAATTGCG 87

Query 61 CGGCGATTAAACCTTACACACAATGTTTTTCT-TTATTA-GA-AACTATTGCTTTGGCT- 116
      |||
Sbjct 88 CGGCGAAAAAACCTTACACACAGTGTTTTT-TGTTATTACAAGAACTTTTGCTTTGG-TC 145

Query 117 TGG-CTAAGAAATTAG-TCGGGCCAGAGGTTTAC---AC-AACTTCAATTTTTTA-ATTG 169
      |||
Sbjct 146 TGGACT-AGAAA-TAGTTTGGGCCAGAGGTTTACTGAACTAACTTCAATATTTATATTG 203

Query 170 AATTGTTATTTA-ATACTTTGTCAATTTGTTGATTAAATTCAAACAATCTTCAAACCTTT 228
      |||
Sbjct 204 AATTGTTATTTATTTA-ATTGTCAATTTGTTGATTAAATTCAAAAAATCTTCAAACCTTT 262

Query 229 CAACAACGGATCTCTTGGTTCTCGCATCGATGAAGAACGCAGCGAAATGCGATAAGTAAT 288
      |||
Sbjct 263 CAACAACGGATCTCTTGGTTCTCGCATCGATGAAGAACGCAGCGAAATGCGATAAGTAAT 322

Query 289 ATGAATTGCAGATTTTCGTGAATCATCGAATCTTTGAACGCACATTGCGCCCTCTGGTAT 348
      |||
Sbjct 323 ATGAATTGCAGATTTTCGTGAATCATCGAATCTTTGAACGCACATTGCGCCCTCTGGTAT 382

Query 349 TCCAGAGGGCATGCCTGTTTGAGCGTCATTTCTCTCTCAAACCCTT-GGGTTTGGTATTG 407
      |||
Sbjct 383 TCCAGAGGGCATGCCTGTTTGAGCGTCATTTCTCTCTCAAACC-TTCGGTTTGGTATTG 441

Query 408 AGTGATACTCTTAGTCGAACTAGGCGTTTGCTTGAAATTTATTGGCATGAGTGACGCTGA 467
      |||
Sbjct 442 AGTGATACTCTTAGTCGAACTAGGCGTTTGCTTGAAATGTATTGGCATGAGTGGTACTG- 500

Query 468 GA-AGTGC-ATTCAGGAAATATCAATGTATTAGGTTTATCCAACCTCGTTGACA-ATTCTT 524
      |||
Sbjct 501 GATAGTGCTAT--ATGACTT-TCAATGTATTAGGTTTATCCAACCTCGTTGA-ATAGT-TT 555

Query 525 GGTGTGA-ATTTTT-GGTGTT--AGGCTTGCCTTAAAAACAACAACAAGTTTGACC 580
      |||
Sbjct 556 AATGGT-ATATTTCTCGGTATTCTAGGCTCGGCCTTACAATATAACAACAAGTTTGACC 614

Query 581 TCAAATCAGGTAGGATTACCCGCTGAACTTAAGCATATCA 620
      |||
Sbjct 615 TCAAATCAGGTAGGATTACCCGCTGAACTTAAGCATATCA 654

```

>emb|AJ606466.1| *Candida coipomoensis* 18S rRNA gene (partial), 5.8S rRNA gene, 26S rRNA gene (partial), ITS1 and ITS2, strain CBS 8178  
Length=609

Score = 797 bits (431), Expect = 0.0  
Identities = 556/613 (90%), Gaps = 21/613 (3%)  
Strand=Plus/Plus

```

Query 15 TGCGGAAGGATCATTACTGTATT-CTAATTGCCAGCGCTTAATTGCGCGGCGATTAAACC 73
      |||
Sbjct 1 TGCGGAAGGATCATTACAGTATTAGT-TTTACCTGCGCTTAATTGCGCGGTAAACAAATC 59

Query 74 TTACACACAATGTTTTTCTTTATTAGAACTATTGCTTTGGCTTGGCTAAGAAATTAGTC 133
      |||
Sbjct 60 TTACACACAGTGTTTTTCTTTATTAGAACTTTTGCTTTGGTTTGGCTTAGAAATAAGTT 119

Query 134 GGGCCAGAGGTTTACACAAACTTCAATTTTAAATTGAATTG-TTATTTA-ATACTTTGTC 191
      |||
Sbjct 120 GGGCCAGAGGTTT--A-TAACTTCAATTTTAAATTGAATTGTTTATTTATTTA-ATTGTC 175

```

```

Query 192 AATTTGTTGATTAAATTTCAAACAATCTTCAAAACTTTCAACAACGGATCTCTTGGTTCTC 251
          |||
Sbjct 176 AATTTGTTGATTAAATTTCAA- AATCTTCAAAACTTTCAACAACGGATCTCTTGGTTCTC 234

Query 252 GCATCGATGAAGAACGCAGCGAAATGCGATAAGTAATATGAATTGCAGATTTTCGTGAAT 311
          |||
Sbjct 235 GCATCGATGAAGAACGCAGCGAAATGCGATAAGTAATATGAATTGCAGATTTTCGTGAAT 294

Query 312 CATCGAATCTTTGAACGCACATTGCGCCCTCTGGTATTCCAGAGGGCATGCCTGTTTGAG 371
          |||
Sbjct 295 CATCGAATCTTTGAACGCACATTGCGCCCTTTGGTATTCCAAAGGGCATGCCTGTTTGAG 354

Query 372 CGTCATTTCTCTCTCAAACCCTT-GGGTTTGGTATTGAGTGATACTCTTAGTCGAACTAG 430
          |||
Sbjct 355 CGTCATTTCTCTCTCAAACC-TTCGGGTTTGGTTTTGAGTGATACTCTTAGTCGAACTAG 413

Query 431 GCGTTTGCTTGAAATTTATTGGCATGAGT-G-ACGCTGAGA-AGTGCATTCAGGAA-ATA 486
          |||
Sbjct 414 GCGTTTGCTTGAAAAGTATTGGCACGAGTAGTAC--TAA-ATAGTGCTTTCAGGAACATT 470

Query 487 T-CAATGTATTAGGTTTATCCAACCTCGTTGACAATTCTTGGTTGTGAATTTTTGGTGT-T 544
          |
Sbjct 471 TTCAATGTATTAGGTTTATCCAACCTCGTTGAGAATTCCCCTAGTGAATTTTTGGTATAT 530

Query 545 AGGCTTTGCCTTAAAAACAACAACAAGTTTGACCTCAAATCAGGTAGGATTACCCGCT 604
          |||
Sbjct 531 -GGCTTTGCCTTACAAAACAACAACAAGTTTGACCTCAAATCAGGTAGGATTACCCGCT 589

Query 605 GAACTTAAGCATA 617
          |||
Sbjct 590 GAACTTAAGCATA 602

```

>gb|EU343832.1| *Candida glabrata* strain MUCL 29834 18S ribosomal RNA gene, partial sequence; internal transcribed spacer 1, 5.8S ribosomal RNA gene, and internal transcribed spacer 2, complete sequence; and 28S ribosomal RNA gene, partial sequence  
Length=619

Score = 795 bits (430), Expect = 0.0  
Identities = 571/633 (90%), Gaps = 33/633 (5%)  
Strand=Plus/Plus

```

Query 1 TCCGTAGGTGAACCTGCGGAAGGATCATTACTGTATTCTAATTGCCAGCGCTTAATTGCG 60
          |||
Sbjct 8 TCCGTAGGTGAACCTGCGGAAGGATCATTACAGTATTCT-ATTGCCTGCGCTTAATTGCG 66

Query 61 CGGCGATTAAACCTTACACACAATGT-TTTTCTTTATTA-GAAACTATTGCTTTGGCTTG 118
          |||
Sbjct 67 CGGCGA-TAAACCTT--ACACAACGTGTTTT-TTTATTATG-AACTATTACTTTGGTTTG 121

Query 119 GCTAAGAAATTAGTCGGGCCAGAGGTTTACACAAACTTCAATTTTTAATTGAATTGTTA- 177
          |||
Sbjct 122 GCTAAGAAATTAGTTGAGCCAGAGG-TGATTTAAACTTCAA-TTTT-ATTGAATTGTTAT 178

Query 178 TTTAATACT-TTGTCAATTTGTTGATTAAATTC-AAACAATCTTCAAAACTTTCAACAAC 235
          |||
Sbjct 179 TTTAAT-TTATTGTCAATTTGTTGATTAAATTCAAAACAATCTTCAAAACTTTCAACAAC 237

Query 236 GGATCTCTTGGTTCTCGCATCGATGAAGAACGCAGCGAAATGCGATAAGTAATATGAATT 295
          |||
Sbjct 238 GGATCTCTTGGTTCTCGCATCGATGAAGAACGCAGCGAAATGCGATAAGTAATATGAATT 297

```

```

Query 296 GCAGATTTTCGTGAATCATCGAATCTTTGAACGCACATTGCGCCCTCTGGTATTCCAGAG 355
          |||
Sbjct 298 GCAGATTTTCGTGAATCATCGAATCTTTGAACGCACATTGCACCCTCTGGTATTCCAGAG 357

Query 356 GGCATGCCTGTTTGAGCGTCATTTCTCTCTCAAACCCTTGGGTTTGGTATTGAGTGATAC 415
          ||
Sbjct 358 GGTATGCCTGTTTGAGCGTCATTTCTCTCTCAAACCCTTGGGTTTGGTATTGAGTGATAC 417

Query 416 TCTTAGTCGAACTAGGCGTTTGCTTGAAATTTATTGGCATGAGT-GACGCTGAGA-AGTG 473
          |||
Sbjct 418 TCTTAGTCGAACTAGGCGTTTGCTTGAAATATATTGGCACGAGTAGT-GTTGA-ACAGTG 475

Query 474 CAT-TCAGGAAATATCAATGTATTAGGTTTATCCAACCTCGTTGACAAT-TCTT-GGTTGT 530
          |||
Sbjct 476 T-TGTCTG-AAC-ATCAATGTATTAGGTTTATCCAACCTCGTTGA-AGCGT-TTAGGTCGT 530

Query 531 GAAT-TT-TTGGTGTTAGGCTTTGCCTTAAAAACAACAACAAGTTTGACCTCAAATCA 588
          |||
Sbjct 531 -ACTATTCTTCAT-T-AGGCTTTGCCTTATAAAACA-CAAACAAGTTTGACCTCAAATCA 586

Query 589 GGTAGGATTACCCGCTGAACCTAAGCATATCAA 621
          |||
Sbjct 587 GGTAGGATTACCCGCTGAACCTAAGCATATCAA 619

```

>gb|EU149791.1| *Debaryomyces hansenii* strain CBS 10751 18S ribosomal RNA gene, partial sequence; internal transcribed spacer 1, 5.8S ribosomal RNA gene, and internal transcribed spacer 2, complete sequence; and 28S ribosomal RNA gene, partial sequence  
Length=624

Score = 791 bits (428), Expect = 0.0  
Identities = 573/637 (89%), Gaps = 33/637 (5%)  
Strand=Plus/Plus

```

Query 1 TCCGTAGGTGAACCTGCGGAAGGATCATTACTGTATTCTAATTGCCAGCGCTTAATTGCG 60
          |||
Sbjct 1 TCCGTAGGTGAACCTGCGGAAGGATCATTACAGTATTCTTTTGGCCAGCGCTTAATTGCG 60

Query 61 CGGCGATTAAACCTTACACACAATGTTTTTCT-TTATTA-GA-AACTATTGCTTTGGCT- 116
          |||
Sbjct 61 CGGCGAAAAAACCTTACACACAGTGTTTTT-TGTTATTACAAGAACTTTGCTTTGG-TC 118

Query 117 TGG-CTAAGAAATTAG-TCGGGCCAGAGGTTTAC---AC-AACTTCAATTTTTTA-ATTG 169
          |||
Sbjct 119 TGGACT-AGAAA-TAGTTTGGGCCAGAGGTTTACTGAACTAAACTTCAATATTTATATTG 176

Query 170 AATTGTTATTTA-ATACTTTGTCAATTTGTTGATTAAATTCAAACAATCTTCAAACCTTT 228
          |||
Sbjct 177 AATTGTTATTTATTTA-ATTGTCAATTTGTTGATTAAATTCAAAAAATCTTCAAACCTTT 235

Query 229 CAACAACGGATCTCTTGGTTCTCGCATCGATGAAGAACGCAGCGAAATGCGATAAGTAAT 288
          |||
Sbjct 236 CAACAACGGATCTCTTGGTTCTCGCATCGATGAAGAACGCAGCGAAATGCGATAAGTAAT 295

Query 289 ATGAATTGCAGATTTTCGTGAATCATCGAATCTTTGAACGCACATTGCGCCCTCTGGTAT 348
          |||
Sbjct 296 ATGAATTGCAGATTTTCGTGAATCATCGAATCTTTGAACGCACATTGCGCCCTCTGGTAT 355

Query 349 TCCAGAGGGCATGCCTGTTTGAGCGTCATTTCTCTCTCAAACCCTT-GGGTTTGGTATTG 407
          |||
Sbjct 356 TCCAGAGGGCATGCCTGTTTGAGCGTCATTTCTCTCTCAAACC-TTCGGGTTTGGTATTG 414

Query 408 AGTGATACTCTTAGTCGAACTAGGCGTTTGCTTGAAATTTATTGGCATGAGTGACGCTGA 467

```

```

Sbjct 415 |||||AGTGATACTCTTAGTTCGAACTAGGCGTTTGCTTGAAATGTATTGGCATGAGTGGTACTG- 473
Query 468 GA-AGTGC-ATTCAGGAAATATCAATGTATTAGGTTTATCCAACCTCGTTGACA-ATTCTT 524
Sbjct 474 |||GATAGTGCTAT--ATGACTT-TCAATGTATTAGGTTTATCCAACCTCGTTGA-ATAGT-TT 528
Query 525 GGTGTGTA-ATTTTT-GGTGTT--AGGCTTTGCCTTAAAAACAACAACAAGTTTGACC 580
Sbjct 529 ||||AATGGT-ATATTTCTCGGTATTCTAGGCTCGGCCTTACAATATAACAACAAGTTTGACC 587
Query 581 TCAAATCAGGTAGGATTACCCGCTGAACTTAAGCATA 617
Sbjct 588 |||||TCAAATCAGGTAGGATTACCCGCTGAACTTAAGCATA 624

```

>gb|EF193068.1| *Debaryomyces hansenii* voucher MCCC2E00280 18S ribosomal RNA gene, partial sequence; internal transcribed spacer 1, 5.8S ribosomal RNA gene, and internal transcribed spacer 2, complete sequence; and 28S ribosomal RNA gene, partial sequence  
Length=645

Score = 791 bits (428), Expect = 0.0  
Identities = 573/637 (89%), Gaps = 33/637 (5%)  
Strand=Plus/Plus

```

Query 1 TCCGTAGGTGAACCTGCGGAAGGATCATTACTGTATTCTAATTGCCAGCGCTTAATTGCG 60
Sbjct 18 |||||TCCGTAGGTGAACCTGCGGAAGGATCATTACAGTATTCTTTTTGCCAGCGCTTAATTGCG 77
Query 61 CGGCGATTAAACCTTACACACAATGTTTTTCT-TTATTA-GA-AACTATTGCTTTGGCT- 116
Sbjct 78 |||||CGGCGAAAAACCTTACACACAGTGTTTTT-TGTTATTACAAGAACTTTTGGCTTTGG-TC 135
Query 117 TGG-CTAAGAAATTAG-TCGGGCCAGAGGTTTAC---AC-AACTTCAATTTTTTA-ATTG 169
Sbjct 136 |||||TGGACT-AGAAA-TAGTTTGGGCCAGAGGTTTACTGAACTAACTTCAATATTTATATTG 193
Query 170 AATTGTTATTTA-ATACTTTGTCAATTTGTTGATTAAATTCAAACAATCTTCAAACCTTT 228
Sbjct 194 |||||AATTGTTATTTATTTA-ATTGTCAATTTGTTGATTAAATTCAAAAAATCTTCAAACCTTT 252
Query 229 CAACAACGGATCTCTTGGTTCTCGCATCGATGAAGAACGCAGCGAAATGCGATAAGTAAT 288
Sbjct 253 |||||CAACAACGGATCTCTTGGTTCTCGCATCGATGAAGAACGCAGCGAAATGCGATAAGTAAT 312
Query 289 ATGAATTGCAGATTTTCGTGAATCATCGAATCTTTGAACGCACATTGCGCCCTCTGGTAT 348
Sbjct 313 |||||ATGAATTGCAGATTTTCGTGAATCATCGAATCTTTGAACGCACATTGCGCCCTCTGGTAT 372
Query 349 TCCAGAGGGCATGCCTGTTTGAGCGTCATTTCTCTCTCAAACCCTT-GGGTTTGGTATTG 407
Sbjct 373 |||||TCCAGAGGGCATGCCTGTTTGAGCGTCATTTCTCTCTCAAACC-TTCGGTTTGGTATTG 431
Query 408 AGTGATACTCTTAGTTCGAACTAGGCGTTTGCTTGAAATTTATTGGCATGAGTGACGCTGA 467
Sbjct 432 |||||AGTGATACTCTTAGTTCGAACTAGGCGTTTGCTTGAAATGTATTGGCATGAGTGGTACTG- 490
Query 468 GA-AGTGC-ATTCAGGAAATATCAATGTATTAGGTTTATCCAACCTCGTTGACA-ATTCTT 524
Sbjct 491 |||GATAGTGCTAT--ATGACTT-TCAATGTATTAGGTTTATCCAACCTCGTTGA-ATAGT-TT 545
Query 525 GGTGTGTA-ATTTTT-GGTGTT--AGGCTTTGCCTTAAAAACAACAACAAGTTTGACC 580

```

Sbjct 546 AATGGT-ATATTTCTCGGTATTCTAGGCTCGGCCTTACAATATAACAAACAAGTTTGACC 604

Query 581 TCAAATCAGGTAGGATTACCCGCTGAACTTAAGCATA 617  
 |||  
 Sbjct 605 TCAAATCAGGTAGGATTACCCGCTGAACTTAAGCATA 641

>gb|DQ668354.1| Debaryomyces hansenii isolate Sy-8 18S ribosomal RNA gene, partial sequence; internal transcribed spacer 1, 5.8S ribosomal RNA gene, and internal transcribed spacer 2, complete sequence; and 28S ribosomal RNA gene, partial sequence  
 Length=633

Score = 789 bits (427), Expect = 0.0  
 Identities = 572/636 (89%), Gaps = 33/636 (5%)  
 Strand=Plus/Plus

Query 1 TCCGTAGGTGAACCTGCGGAAGGATCATTACTGTATTCTAATTGCCAGCGCTTAATTGCG 60  
 |||  
 Sbjct 9 TCCGTAGGTGAACCTGCGGAAGGATCATTACAGTATTCTTTTTGCCAGCGCTTAATTGCG 68

Query 61 CGGCGATTAAACCTTACACACAATGTTTTTCT-TTATTA-GA-AACTATTGCTTTGGCT- 116  
 |||  
 Sbjct 69 CGGCGAAAAAACCTTACACACAGTGTTTTT-TGTTATTACAAGAACTTTTGGCTTTGG-TC 126

Query 117 TGG-CTAAGAAATTAG-TCGGGCCAGAGGTTTAC---AC-AACTTCAATTTTTA-ATTG 169  
 |||  
 Sbjct 127 TGGACT-AGAAA-TAGTTTGGGCCAGAGGTTTACTGAACTAAACTTCAATATTTATATTG 184

Query 170 AATTGTTATTTA-ATACTTTGTCAATTTGTTGATTAAATTCAAACAATCTTCAAACCTTT 228  
 |||  
 Sbjct 185 AATTGTTATTTATTTA-ATTGTCAATTTGTTGATTAAATTCAAAAAATCTTCAAACCTTT 243

Query 229 CAACAACGGATCTCTTGGTTCTCGCATCGATGAAGAACGCAGCGAAATGCGATAAGTAAT 288  
 |||  
 Sbjct 244 CAACAACGGATCTCTTGGTTCTCGCATCGATGAAGAACGCAGCGAAATGCGATAAGTAAT 303

Query 289 ATGAATTGCAGATTTTCGTGAATCATCGAATCTTTGAACGCACATTGCGCCCTCTGGTAT 348  
 |||  
 Sbjct 304 ATGAATTGCAGATTTTCGTGAATCATCGAATCTTTGAACGCACATTGCGCCCTCTGGTAT 363

Query 349 TCCAGAGGGCATGCCTGTTTGAGCGTCATTTCTCTCTCAAACCCTT-GGGTTTGGTATTG 407  
 |||  
 Sbjct 364 TCCAGAGGGCATGCCTGTTTGAGCGTCATTTCTCTCTCAAACC-TTCGGTTTGGTATTG 422

Query 408 AGTGATACTCTTAGTCGAACTAGGCGTTTGCTTGAAATTTATTGGCATGAGTGACGCTGA 467  
 |||  
 Sbjct 423 AGTGATACTCTTAGTCGAACTAGGCGTTTGCTTGAAATGTATTGGCATGAGTGGTACTG- 481

Query 468 GA-AGTGC-ATTCAGGAAATATCAATGTATTAGGTTTATCCAACCTCGTTGACA-ATTCTT 524  
 |||  
 Sbjct 482 GATAGTGCTAT--ATGACTT-TCAATGTATTAGGTTTATCCAACCTCGTTGA-ATAGT-TT 536

Query 525 GGTTGTGA-ATTTTT-GGTGTT--AGGCTTGCCTTAAAAACAACAACAAGTTTGACC 580  
 |||  
 Sbjct 537 AATGGT-ATATTTCTCGGTATTCTAGGCTCGGCCTTACAATATAACAAACAAGTTTGACC 595

Query 581 TCAAATCAGGTAGGATTACCCGCTGAACTTAAGCAT 616  
 |||  
 Sbjct 596 TCAAATCAGGTAGGATTACCCGCTGAACTTAAGCAT 631

>gb|AY964676.1| Candida sinolaborantium strain BG04-2-20-1-1-C1 18S ribosomal RNA gene, partial sequence; internal transcribed spacer 1,

5.8S ribosomal RNA gene, and internal transcribed spacer 2, complete sequence; and 26S ribosomal RNA gene, partial sequence  
Length=604

Score = 789 bits (427), Expect = 0.0  
Identities = 566/626 (90%), Gaps = 37/626 (5%)  
Strand=Plus/Plus

```
Query 1 TCCGTAGGTGAACCTGCGGAAGGATCATTACTGTATTCTAATTGCCAGCGCTTAATTGCG 60
      |||
Sbjct 3 TCCGTAGGTGAACCTGCGGAAGGATCATTACAGTATTCT-TTTGCCAGCGCTTAATTGCG 61

Query 61 CGGCGATTAAACCTTACACACAATGTTTTTCT-TTATTAGAAACTATTGCTTTGGCTTGG 119
      |||
Sbjct 62 CGGCGA-AAAACCTTACACACAATGTTTTT-TGTT-TT--AAACCATTGCTTTGGCTTGG 116

Query 120 -CTAAGAAATTA-GTCGGGCCAGAGGTTTAC-AC-AAACTTCAATTTTAAATTGAATTGT 175
      ||
Sbjct 117 CCT-AGAAA-TAGGTTGGGTCTAGAGGTTTACAACCTTCAATTTT-ATTGAATTGT 173

Query 176 TATTT-AA-TACTTTGTCAATTTGTTGATTAAATTCAAACAATCTTCAAACTTTCAACA 233
      |
Sbjct 174 T-TTTAAATTA-TTTGTCAATTTGTTGATTAAATTCAA- AATCTTCAAACTTTCAACA 230

Query 234 ACGGATCTCTTGGTTCTCGCATCGATGAAGAACGCAGCGAAATGCGATAAGTAATATGAA 293
      |||
Sbjct 231 ACGGATCTCTTGGTTCTCGCATCGATGAAGAACGCAGCGAAATGCGATAAGTAATATGAA 290

Query 294 TTGCAGATTTTCGTGAATCATCGAATCTTTGAACGCACATTGCGCCCTCTGGTATTCCAG 353
      |||
Sbjct 291 TTGCAGATTTTCGTGAATCATCGAATCTTTGAACGCACATTGCGCCCTTTGGTATTCCAA 350

Query 354 AGGGCATGCCTGTTTGAGCGTCATTTCTCTCTCAAACCTTGGGTTTGGTATTGAGTGAT 413
      |||
Sbjct 351 AGGGCATGCCTGTTTGAGCGTCATTTCTCTCTCAAACCTTGGGTTTGGTATTGAGTGAT 410

Query 414 ACTCTTAGTCGAACTAGGCGTTTGCTTGAAATTTATTGGCATGAGTG-ACGCTGAGA-AG 471
      |||
Sbjct 411 ACTCTTAGTCGAACTAGGCGTTTGCTTGAAAAGTATTGGCATGAGTGAC--TG-GATAG 467

Query 472 TGCATTTCAGGAAATAT-CAATGTATTAGGTTTATCCAACCTCGTTGACA--ATTCTTGGTT 528
      |
Sbjct 468 TACGTTCTG-AT-TATTCAATGTATTAGGTTTATCCAACCTCGTTGA-AGGAT-CA-GGT- 521

Query 529 GTGAATTTTGGTGT-TAGGCTTTGCCTTAAAAACAACAACAAGTTTGACCTCAAATC 587
      ||
Sbjct 522 GTAAATTTCTGGTGTATTGGCTCGGCCTTACAA--CAACAACAAGTT-GACCTCAAATC 578

Query 588 AGGTAGGATTACCCGCTGAACTTAAG 613
      |||
Sbjct 579 AGGTAGGATTACCCGCTGAACTTAAG 604
```

>gb|AY964675.1| *Candida sinolaborantium* strain BG04-2-20-1-1-1 18S ribosomal RNA gene, partial sequence; internal transcribed spacer 1, 5.8S ribosomal RNA gene, and internal transcribed spacer 2, complete sequence; and 26S ribosomal RNA gene, partial sequence  
Length=604

Score = 789 bits (427), Expect = 0.0  
Identities = 566/626 (90%), Gaps = 37/626 (5%)  
Strand=Plus/Plus

```
Query 1 TCCGTAGGTGAACCTGCGGAAGGATCATTACTGTATTCTAATTGCCAGCGCTTAATTGCG 60
```

```

Sbjct 3      |||...|||
TCCGTAGGTGAACCTGCGGAAGGATCATTACAGTATTCT-TTTGCCAGCGCTTAATTGCG 61

Query 61     CGGCGATTAAACCTTACACACAATGTTTTTCT-TTATTAGAAACTATTGCTTTGGCTTGG 119
|||...|||

Sbjct 62     CGGCGA-AAAACCTTACACACAATGTTTTT-TGTT-TT--AAACCATTGCTTTGGCTTGG 116

Query 120    -CTAAGAAATTA-GTCGGGCCAGAGGTTTAC-AC-AAACTTCAATTTTAAATTGAATTGT 175
||...||

Sbjct 117    CCT-AGAAA-TAGGTTGGGTGAGAGGTTTACAACCTAACTTCAATTTT-ATTGAATTGT 173

Query 176    TATTT-AA-TACTTTGTCAATTTGTTGATTAAATTCAAACAATCTTCAAACCTTTCAACA 233
|...|

Sbjct 174    T-TTTAAATTA-TTGTGCAATTTGTTGATTAAATTCAA- AATCTTCAAACCTTTCAACA 230

Query 234    ACGGATCTCTTGGTTCTCGCATCGATGAAGAACGCAGCGAAATGCGATAAGTAATATGAA 293
|||...|||

Sbjct 231    ACGGATCTCTTGGTTCTCGCATCGATGAAGAACGCAGCGAAATGCGATAAGTAATATGAA 290

Query 294    TTGCAGATTTTCGTGAATCATCGAATCTTTGAACGCACATTGCGCCCTCTGGTATTCCAG 353
|||...|||

Sbjct 291    TTGCAGATTTTCGTGAATCATCGAATCTTTGAACGCACATTGCGCCCTTTGGTATTCCAA 350

Query 354    AGGGCATGCCTGTTTGAGCGTCATTTCTCTCTCAAACCTTTGGGTTTGGTATTGAGTGAT 413
|||...|||

Sbjct 351    AGGGCATGCCTGTTTGAGCGTCATTTCTCTCTCAAACCTTTGGGTTTGGTATTGAGTGAT 410

Query 414    ACTCTTAGTCGAACTAGGCGTTTGCTTGAAATTTATTGGCATGAGTG-ACGCTGAGA-AG 471
|||...|||

Sbjct 411    ACTCTTAGTCGGACTAGGCGTTTGCTTGAAAAGTATTGGCATGAGTGTAC--TG-GATAG 467

Query 472    TGCATTCAGGAAATAT-CAATGTATTAGGTTTATCCAACCTCGTTGACA--ATTCTTGGTT 528
|...|

Sbjct 468    TACGTTCTG-AT-TATTCAATGTATTAGGTTTATCCAACCTCGTTGA-AGGAT-CA-GGT- 521

Query 529    GTGAATTTTTGGTGT-TAGGCTTTGCCTTAAAAACAACAACAAGTTTGACCTCAAATC 587
||...||

Sbjct 522    GTAAATTTCTGGTGTATTGGCTCGGCCTTACAA--CAACAACAAGTT-GACCTCAAATC 578

Query 588    AGGTAGGATTACCCGCTGAACTTAAG 613
|||...|||

Sbjct 579    AGGTAGGATTACCCGCTGAACTTAAG 604

```

>gb|AY964674.1| *Candida sinolaborantium* strain CBS 9940 18S ribosomal RNA gene, partial sequence; internal transcribed spacer 1, 5.8S ribosomal RNA gene, and internal transcribed spacer 2, complete sequence; and 26S ribosomal RNA gene, partial sequence  
Length=604

Score = 789 bits (427), Expect = 0.0  
Identities = 566/626 (90%), Gaps = 37/626 (5%)  
Strand=Plus/Plus

```

Query 1      TCCGTAGGTGAACCTGCGGAAGGATCATTACTGTATTCTAATTGCCAGCGCTTAATTGCG 60
|||...|||

Sbjct 3      TCCGTAGGTGAACCTGCGGAAGGATCATTACAGTATTCT-TTTGCCAGCGCTTAATTGCG 61

Query 61     CGGCGATTAAACCTTACACACAATGTTTTTCT-TTATTAGAAACTATTGCTTTGGCTTGG 119
|||...|||

Sbjct 62     CGGCGA-AAAACCTTACACACAATGTTTTT-TGTT-TT--AAACCATTGCTTTGGCTTGG 116

Query 120    -CTAAGAAATTA-GTCGGGCCAGAGGTTTAC-AC-AAACTTCAATTTTAAATTGAATTGT 175
||...||

```

|       |     |                                                                |     |
|-------|-----|----------------------------------------------------------------|-----|
| Sbjct | 117 | CCT-AGAAA-TAGGTTGGGTCAGAGGTTTACAAC TAAACTTCAATTTTT-ATTGAATTGT  | 173 |
| Query | 176 | TATTT-AA-TACTTTGTCAATTTGTTGATTAAATTCAAACAATCTTCAAAC TTTCAACA   | 233 |
| Sbjct | 174 | T-TTTAAATTA-TTTGTCAATTTGTTGATTAAATTCAA A-AATCTTCAAAC TTTCAACA  | 230 |
| Query | 234 | ACGGATCTCTTGGTTCTCGCATCGATGAAGAACGCAGCGAAATGCGATAAGTAATATGAA   | 293 |
| Sbjct | 231 | ACGGATCTCTTGGTTCTCGCATCGATGAAGAACGCAGCGAAATGCGATAAGTAATATGAA   | 290 |
| Query | 294 | TTGCAGATTTTCGTGAATCATCGAATCTTTGAACGCACATTGCGCCCTCTGGTATTCCAG   | 353 |
| Sbjct | 291 | TTGCAGATTTTCGTGAATCATCGAATCTTTGAACGCACATTGCGCCCTTTGGTATTCCAA   | 350 |
| Query | 354 | AGGGCATGCCTGTTTGAGCGTCATTTCTCTCTCAAACCTTGGGTTTGGTATTGAGTGAT    | 413 |
| Sbjct | 351 | AGGGCATGCCTGTTTGAGCGTCATTTCTCTCTCAAACCTCGGGTTTGGTATTGAGTGAT    | 410 |
| Query | 414 | ACTCTTAGTCGAACTAGGCGTTTGCTTGAAATTTATTGGCATGAGTG-ACGCTGAGA-AG   | 471 |
| Sbjct | 411 | ACTCTTAGTCGGACTAGGCGTTTGCTTGAAAAGTATTGGCATGAGTGTAC--TG-GATAG   | 467 |
| Query | 472 | TGCATT CAGGAAATAT-CAATGTATTAGGTTTATCCAAC TCGTTGACA--ATTCTTGGTT | 528 |
| Sbjct | 468 | TACGTTCTG-AT-TATTCAATGTATTAGGTTTATCCAAC TCGTTGA-AGGAT-CA-GGT-  | 521 |
| Query | 529 | GTGAATTTTGGTGT-TAGGCTTTGCCTTAAAAACAACAACAAGTTTGACCTCAAATC      | 587 |
| Sbjct | 522 | GTAAATTTCTGGTGTATTGGCTCGGCCTTACAA--CAACAACAAGTT-GACCTCAAATC    | 578 |
| Query | 588 | AGGTAGGATTACCCGCTGAACTTAAG                                     | 613 |
| Sbjct | 579 | AGGTAGGATTACCCGCTGAACTTAAG                                     | 604 |

>gb|AY964679.1| *Candida temnochilae* strain CBS 9939 18S ribosomal RNA gene, partial sequence; internal transcribed spacer 1, 5.8S ribosomal RNA gene, and internal transcribed spacer 2, complete sequence; and 26S ribosomal RNA gene, partial sequence  
Length=602

Score = 787 bits (426), Expect = 0.0  
Identities = 562/622 (90%), Gaps = 31/622 (4%)  
Strand=Plus/Plus

|       |     |                                                               |     |
|-------|-----|---------------------------------------------------------------|-----|
| Query | 1   | TCCGTAGGTGAACCTGCGGAAGGATCATTACTGTATTCTAATTGCCAGCGCTTAATTGCG  | 60  |
| Sbjct | 3   | TCCGTAGGTGAACCTGCGGAAGGATCATTACAGTATTCT-TTTGCCAGCGCTTAACTGCG  | 61  |
| Query | 61  | CGGCGATTAAACCTTACACACAATGTTTTTCT-TTATTAGAAACTATTGCTTTGGCTTGG  | 119 |
| Sbjct | 62  | CGGCGA-AAAACCTTACACACAGTGTTTTT-TGTT-TTA-AAACCATGCTTTGGCTTGG   | 117 |
| Query | 120 | CTAAGAAATTA-GTCGGGCCAGAGGTTTACACAAACTTCAATTTTTAATTGAATTGTTAT  | 178 |
| Sbjct | 118 | CTTAGAAA-TAGGTTGGGCCAAAGGTTTAC-TAAACTTCAA-TTTT-ATTGAATTGTT-T  | 172 |
| Query | 179 | TT-AATACTTTGTCAATTTGTTGATTAAATTCAAACAATCTTCAAAC TTTCAACAACGG  | 237 |
| Sbjct | 173 | TTAAATA-ATTGTCAATTTGTTGATTAAATTCAA A-AATCTTCAAAC TTTCAACAACGG | 230 |
| Query | 238 | ATCTCTTGGTTCTCGCATCGATGAAGAACGCAGCGAAATGCGATAAGTAATATGAATTGC  | 297 |
| Sbjct | 231 | ATCTCTTGGTTCTCGCATCGATGAAGAACGCAGCGAAATGCGATAAGTAATATGAATTGC  | 290 |



```

Query 298 AGATTTTCGTGAATCATCGAATCTTTGAACGCACATTGCGCCCTCT-GGTATTCCAGAGG 356
          |||
Sbjct 291 AGATTTTCGTGAATCATCGAATCTTTGAACGCACATTGCGCCC-CTTGGTATTCCAGGGG 349

Query 357 GCATGCCTGTTTGAGCGTCATTTCTCTCTCAAACCTTTGGGTTTGGTATTGAGTGATACT 416
          |||
Sbjct 350 GCATGCCTGTTTGAGCGTCATTTCTCTCTCAAACCTTTGGGTTTGGTATTGAGTGATACT 409

Query 417 CTTAGTCGAACTAGGCGTTTGCTTGAAATTTATTGGCATGAGTGACGCTGAGA-AGTGCA 475
          |||
Sbjct 410 CTTAGTCGAACTAGGCGTTTGCTTGAAAAGTATTGGCATGAGTGT-GCTG-GATAGTACG 467

Query 476 TTCAGGAAATAT-CAATGTATTAGGTTTATCCAACCTCGTTGA-CAATTCTTGGTTGTGAA 533
          |||
Sbjct 468 TTCTG-AT-TATTCAATGTATTAGGTTTATCCAACCTCGTTGAACGGT-CA-GGT-GTAAA 522

Query 534 TTTTGGT-GT-TAGGCTTTCCTTAAAAACAACAAACAAGTTTGACCTCAAATCAGGT 591
          |||
Sbjct 523 TTTCTGGTAGTATTGGCTCGGCCTTATAA--CAACAAACAAGTTTGACCTCAAATCAGGT 580

Query 592 AGGATTACCCGCTGAACTTAAG 613
          |||
Sbjct 581 AGGATTACCCGCTGAACTTAAG 602

```

>gb|AY964678.1| *Candida temnochilae* strain CBS 9938 18S ribosomal RNA gene, partial sequence; internal transcribed spacer 1, 5.8S ribosomal RNA gene, and internal transcribed spacer 2, complete sequence; and 26S ribosomal RNA gene, partial sequence  
Length=602

Score = 787 bits (426), Expect = 0.0  
Identities = 563/623 (90%), Gaps = 33/623 (5%)  
Strand=Plus/Plus

```

Query 1 TCCGTAGGTGAACCTGCGGAAGGATCATTACTGTATTCTAATTGCCAGCGCTTAATTGCG 60
          |||
Sbjct 3 TCCGTAGGTGAACCTGCGGAAGGATCATTACAGTATTCT-TTTGCCAGCGCTTAATTGCG 61

Query 61 CGGCGATTAAACCTTACACACAATGTTTTTCT-TTATTAGAACTATTGCTTTGGCTTGG 119
          |||
Sbjct 62 CGGCGA-AAAACCTTACACACAGTGTTTTT-TGTT-TTA-AACTATTGCTTTGGCTTGG 117

Query 120 CTAAGAAATTA-GTCGGGCCAGAGGTTTACACAACTTCAATTTTAAATTGAATTGTTAT 178
          |||
Sbjct 118 CTTAGAAA-TAGGTTGGGCCAAAGGTTTAC-CAAACCTCAA-TTTT-ATTGAATTGTT-T 172

Query 179 TT-AATACTTTGTCAATTTGTTGATTAAATTCAAACAATCTTCAAACTTTCAACAACGG 237
          |||
Sbjct 173 TTAAAT-GTTTGTCAATTTGTTGATTAAATTCAA-AATCTTCAAACTTTCAACAACGG 230

Query 238 ATCTCTTGGTTCTCGCATCGATGAAGAACGCAGCGAAATGCGATAAGTAATATGAATTGC 297
          |||
Sbjct 231 ATCTCTTGGTTCTCGCATCGATGAAGAACGCAGCGAAATGCGATAAGTAATATGAATTGC 290

Query 298 AGATTTTCGTGAATCATCGAATCTTTGAACGCACATTGCGCCCTCT-GGTATTCCAGAGG 356
          |||
Sbjct 291 AGATTTTCGTGAATCATCGAATCTTTGAACGCACATTGCGCCC-CTTGGTATTCCAGGGG 349

Query 357 GCATGCCTGTTTGAGCGTCATTTCTCTCTCAAACC-CTTGGGTTTGGTATTGAGTGATAC 415
          |||
Sbjct 350 GCATGCCTGTTTGAGCGTCATTTCTCTCTCAAACCTCA-GGGTTTGGTATTGAGTGATAC 408

```





>gb|EF192225.1| *Debaryomyces hansenii* 18S ribosomal RNA gene, partial sequence; internal transcribed spacer 1, 5.8S ribosomal RNA gene, and internal transcribed spacer 2, complete sequence; and 28S ribosomal RNA gene, partial sequence  
Length=659

Score = 784 bits (424), Expect = 0.0  
Identities = 571/636 (89%), Gaps = 33/636 (5%)  
Strand=Plus/Plus

```
Query 1 TCCGTAGGTGAACCTGCGGAAGGATCATTACTGTATTCTAATTGCCAGCGCTTAATTGCG 60
      |||
Sbjct 33 TCCGTAGGTGAACCTGCGGAAGGATCATTACAGTATTCTTTTGGCCAGCGCTTGATTGCG 92

Query 61 CGGCGATTAAACCTTACACACAATGTTTTTCT-TTATTA-GA-AACTATTGCTTTGGCT- 116
      |||
Sbjct 93 CGGCGAAAAAACCTTACACACAGTGTTTTT-TGTTATTACAAGAACTTTTGCTTTGG-TC 150

Query 117 TGG-CTAAGAAATTAG-TCGGGCCAGAGGTTTAC---AC-AACTTCAATTTTTA-ATTG 169
      |||
Sbjct 151 TGGACT-AGAAA-TAGTTTGGGCCAGAGGTTTACTGAACTAAACTTCAATATTTATATTG 208

Query 170 AATTGTTATTTA-ATACTTTGTCAATTTGTTGATTAAATTCAAACAATCTTCAAACCTTT 228
      |||
Sbjct 209 AATTGTTATTTATTTA-ATTGTCAATTTGTTGATTAAATTCAAAAAATCTTCAAACCTTT 267

Query 229 CAACAACGGATCTCTTGGTTCTCGCATCGATGAAGAACGCAGCGAAAATGCGATAAGTAAT 288
      |||
Sbjct 268 CAACAACGGATCTCTTGGTTCTCGCATCGATGAAGAACGCAGCGAAAATGCGATAAGTAAT 327

Query 289 ATGAATTGCAGATTTTCGTGAATCATCGAATCTTTGAACGCACATTGCGCCCTCTGGTAT 348
      |||
Sbjct 328 ATGAATTGCAGATTTTCGTGAATCATCGAATCTTTGAACGCACATTGCGCCCTCTGGTAT 387

Query 349 TCCAGAGGGCATGCCTGTTTGAGCGTCATTTCTCTCTCAAACCCTT-GGGTTTGGTATTG 407
      |||
Sbjct 388 TCCAGAGGGCATGCCTGTTTGAGCGTCATTTCTCTCTCAAACC-TTCGGGTTTGGTATTG 446

Query 408 AGTGATACTCTTAGTCGAACTAGGCGTTTGCTTGAATTTATTGGCATGAGTGACGCTGA 467
      |||
Sbjct 447 AGTGATACTCTTAGTCGAACTAGGCGTTTGCTTGAATGTATTGGCATGAGTGGTACTG- 505

Query 468 GA-AGTGC-ATTCAGGAAATATCAATGTATTAGTTTATCCAACCTCGTTGACA-ATTCTT 524
      |||
Sbjct 506 GATAGTGCTAT--ATGACTT-TCAATGTATTAGTTTATCCAACCTCGTTGA-ATAGT-TT 560

Query 525 GGTTGTGA-ATTTTT-GGTGTT--AGGCTTGCCTTAAAAACAACAACAAGTTTGACC 580
      |||
Sbjct 561 AATGGT-ATATTCTCGGTATTCTAGGCTCGGCCTTACAATATAACAACAAGTTTGACC 619

Query 581 TCAAATCAGGTAGGATTACCCGCTGAACTTAAGCAT 616
      |||
Sbjct 620 TCAAATCAGGTAGGATTACCCGCTGAACTTAAGCAT 655
```

>gb|AY845351.1| *Candida lignicola* 18S ribosomal RNA gene, partial sequence  
Length=2337

Score = 784 bits (424), Expect = 0.0  
Identities = 547/602 (90%), Gaps = 26/602 (4%)  
Strand=Plus/Plus

```
Query 1 TCCGTAGGTGAACCTGCGGAAGGATCATTACTGTATTCTA--ATTGCCAGCGCTTAATTG 58
      |||
```





```

Query 288 TATGAATTGCAGATTTTCGTGAATCATCGAATCTTTGAACGCACATTGCGCCCTCTGGTA 347
          |||
Sbjct 324 TATGAATTGCAGATTTTCGTGAATCATCGAATCTTTGAACGCACATTGCGCCCTTTGGTA 383

Query 348 TTCCAGAGGGCATGCCTGTTTGAGCGTCATTTCTCTCTCAAACCCCTT-GGGTTTGGTATT 406
          |||
Sbjct 384 TTCCAAAGGGCATGCCTGTTTGAGCGTCATTTCTCTCTCAAACC-TTCGGGTTTGGTATT 442

Query 407 GAGTGATACTCTTAGTTCGAACTAGGCGTTTGCTTGAATTTATTGGCATGAGTGACGCTG 466
          |||
Sbjct 443 GAGTGATACTCTTAGTTCGAACTAGGCGTTTGCTTGAATGTATTGGCATGAGTGGTACTG 502

Query 467 AGA-AGTGC-ATTCAGGAAATATCAATGTATTAGGTTTATCCAACCTCGTTGACA-ATTCT 523
          ||
Sbjct 503 -GATAGTGCTAT--ATGACTT-TCAATGTATTAGGTTTATCCAACCTCGTTGA-ATAGT-T 556

Query 524 TGGTTGTGA-ATTTTT-GGTGTT--AGGCTTTGCCTTAAAAAACAACAAACAAGTTTGAC 579
          |
Sbjct 557 TAATGGT-ATATTTCTCGGTATTCTAGGCTCGGCCTTACAATATAACAAACAAGTTTGAC 615

Query 580 CTCAAATCAGGTAGGATTACCCGCTGAACTTAAGCATATCAATA 623
          |||
Sbjct 616 CTCAAATCAGGTAGGACTACCCGCTGAACTTAAGCATATCAATA 659

```

>gb|EF190234.1| *Debaryomyces hansenii* strain NA-1 18S ribosomal RNA gene, partial sequence; internal transcribed spacer 1, 5.8S ribosomal RNA gene, and internal transcribed spacer 2, complete sequence; and 28S ribosomal RNA gene, partial sequence  
Length=672

Score = 782 bits (423), Expect = 0.0  
Identities = 584/655 (89%), Gaps = 37/655 (5%)  
Strand=Plus/Plus

```

Query 1 TCCGTAGGTGAACCTGCGGAAGGATCATTACTGTATTCTAATTGCCAGCGCTTAATTGCG 60
          |||
Sbjct 31 TCCGTAGGTGAACCTGCGGAAGGATCATTACAGTATTCTTTTGGCAGCGCTTAATTGCG 90

Query 61 CGGCGATTAAACCTTACACACAATGTTTTTCT-TTATTA-GA-AACTATTGCTTTGGCT- 116
          |||
Sbjct 91 CGGCGAAAAAACCTTACACACAGTGTTTTT-TGTTATTACAAGAACTCTTGCTTTGG-TC 148

Query 117 TGG-CTAAGAAATTAG-TCGGGCCAGAGGTTTAC---AC-AACTTCAATTTTTTA-ATTG 169
          |||
Sbjct 149 TGGACT-AGAAA-TAGTTTGGGCCAGAGGTTTACTAAACTAAACTTCAATATTTATATTG 206

Query 170 AATTGTTATTTAATACT--TTGTCAATTTGTTGATTAAATTCAAACAATCTTCAAACCTT 227
          |||
Sbjct 207 AATTGTTATTT-ATTTTAATTGTCAATTTGTTGATTAAATTCAAAAAATCTTCAAACCTT 265

Query 228 TCAACAACGGATCTCTTGTTTCTCGCATCGATGAAGAACGCAGCGAAATGCGATAAGTAA 287
          |||
Sbjct 266 TCAACAACGGATCTCTTGTTTCTCGCATCGATGAAGAACGCAGCGAAATGCGATAAGTAA 325

Query 288 TATGAATTGCAGATTTTCGTGAATCATCGAATCTTTGAACGCACATTGCGCCCTCTGGTA 347
          |||
Sbjct 326 TATGAATTGCAGATTTTCGTGAATCATCGAATCTTTGAACGCACATTGCGCCCTTTGGTA 385

Query 348 TTCCAGAGGGCATGCCTGTTTGAGCGTCATTTCTCTCTCAAACCCCTT-GGGTTTGGTATT 406
          |||
Sbjct 386 TTCCAAAGGGCATGCCTGTTTGAGCGTCATTTCTCTCTCAAACC-TTCGGGTTTGGTATT 444

Query 407 GAGTGATACTCTTAGTTCGAACTAGGCGTTTGCTTGAATTTATTGGCATGAGTGACGCTG 466

```





```

Sbjct 526 ATTTCTCGGTATTCTAGGCTCGGCCTTACAATATAACAAACAAGTTTGACCTCAAATCAG 585
Query 590 GTAGGATTACCCGCTGAACTTAAGCATATCAATAAGCGGAGGA 632
      |||
Sbjct 586 GTAGGATTACCCGCTGAACTTAAGCATATCAATA-GCGGAGGA 627

```

>gb|GQ376085.1| *Debaryomyces hansenii* var. *hansenii* isolate UOA/HCPF 10197B 18S ribosomal RNA gene, partial sequence; internal transcribed spacer 1, 5.8S ribosomal RNA gene, and internal transcribed spacer 2, complete sequence; and 28S ribosomal RNA gene, partial sequence  
Length=639

Score = 780 bits (422), Expect = 0.0  
Identities = 584/655 (89%), Gaps = 39/655 (5%)  
Strand=Plus/Plus

```

Query 1 TCCGTAGGTGAACCTGCGGAAGGATCATTACTGTATTCTAATTGCCAGCGCTTAATTGCG 60
      |||
Sbjct 1 TCCGTAGGTGAACCTGCGGAAGGATCATTACAGTATTCTTTTTGCCAGCGCTTAATTGCG 60

Query 61 CGGCGATTAAACCTTACACACAATGTTTTTCT-TTATTA-GA-AACTATTGCTTTGGCT- 116
      |||
Sbjct 61 CGGCGAAAAAACCTTACACACAGTGTTTTT-TGTTATTACAAGAACTTTTGCTTTGG-TC 118

Query 117 TGG-CTAAGAAATTAG-TCGGGCCAGAGGTTTAC---AC-AACTTCAATTTTTA-ATTG 169
      |||
Sbjct 119 TGGACT-AGAAA-TAGTTTGGGCCAGAGGTTTACTGAACTAAACTTCAATATTTATATTG 176

Query 170 AATTGTTATTTA-ATACTTTGTCAATTTGTTGATTAAATTCAAACAATCTTCAAACCTTT 228
      |||
Sbjct 177 AATTGTTATTTATTTA-ATTGTCAATTTGTTGATTAAATTCAAAAAATCTTCAAACCTTT 235

Query 229 CAACAACGGATCTCTTGGTTCTCGCATCGATGAAGAACGCAGCGAAATGCGATAAGTAAT 288
      |||
Sbjct 236 CAACAACGGATCTCTTGGTTCTCGCATCGATGAAGAACGCAGCGAAATGCGATAAGTAAT 295

Query 289 ATGAATTGCAGATTTTCGTGAATCATCGAATCTTTGAACGCACATTGCGCCCTCTGGTAT 348
      |||
Sbjct 296 ATGAATTGCAGATTTTCGTGAATCATCGAATCTTTGAACGCACATTGCGCCCTCTGGTAT 355

Query 349 TCCAGAGGGCATGCCTGTTTGAGCGTCATTTCTCTCTCAAACCCTT-GGGTTTGGTATTG 407
      |||
Sbjct 356 TCCAGAGGGCATGCCTGTTTGAGCGTCATTTCTCTCTCAAACC-TTCGGTTTGGTATTG 414

Query 408 AGTGATACTCTTAGTTCGAACTAGGCGTTTGCTTGAAATTTATTGGCATGAGTGACGCTGA 467
      |||
Sbjct 415 AGTGATACTCTTAGTTGAACTAGGCGTTTGCTTGAAATGTATTGGCATGAGTGGTACTG- 473

Query 468 GA-AGTGC-ATTCAGGAAATATCAATGTATTAGGTTTATCCAACCTGTTGACA-ATTCTT 524
      |||
Sbjct 474 GATAGTGCTAT--ATGACTT-TCAATGTATTAGGTTTATCCAACCTGTTGA-ATAGT-TT 528

Query 525 GGTTGTGA-ATTTTT-GGTGTT--AGGCTTTGCCTTAAAAACAACAACAAGTTTGACC 580
      |||
Sbjct 529 AATGGT-ATATTCTCGGTATTCTAGGCTCGGCCTTACAATATAACAAACAAGTT-GACC 586

Query 581 TCAAATCAGGTAGGA-T--TACCCGCTGAACTTAAGCATATCAATAAGCGGAGGA 632
      |||
Sbjct 587 TCAAATCAG-T-GGAATACTACCCGCTGAACTTAAGCATATCAATAAGCGGAGGA 639

```

>gb|EF197943.1| *Debaryomyces hansenii* strain HK67-4 18S ribosomal RNA gene, partial

sequence; internal transcribed spacer 1, 5.8S ribosomal  
RNA gene, and internal transcribed spacer 2, complete sequence;  
and 28S ribosomal RNA gene, partial sequence  
Length=669

Score = 780 bits (422), Expect = 0.0  
Identities = 583/654 (89%), Gaps = 37/654 (5%)  
Strand=Plus/Plus

```
Query 1 TCCGTAGGTGAACCTGCGGAAGGATCATTACTGTATTCTAATTGCCAGCGCTTAATTGCG 60
      |||
Sbjct 28 TCCGTAGGTGAACCTGCGGAAGGATCATTACAGTATTCTTTTGGCCAGCGCTTAATTGCG 87

Query 61 CGGCGATTAAACCTTACACACAATGTTTTTCT-TTATTA-GA-AACTATTGCTTTGGCT- 116
      |||
Sbjct 88 CGGCGAAAAAACCTTACACACAGTGTTTTT-TGTTATTACAAGAACTCTTGCTTTGG-TC 145

Query 117 TGG-CTAAGAAATTAG-TCGGGCCAGAGGTTTAC---AC-AACTTCAATTTTTA-ATTG 169
      |||
Sbjct 146 TGGACT-AGAAA-TAGTTTGGGCCAGAGGTTTACTAAACTAAACTTCAATATTTATATTG 203

Query 170 AATTGTTATTTAATACT--TTGTCAATTTGTTGATTAAATTCAAACAATCTTCAAACCTT 227
      |||
Sbjct 204 AATTGTTATTT-ATTTTAATTGTCAATTTGTTGATTAAATTCAAAAAATCTTCAAACCTT 262

Query 228 TCAACAACGGATCTCTTGGTTCTCGCATCGATGAAGAACGCAGCGAAATGCGATAAGTAA 287
      |||
Sbjct 263 TCAACAACGGATCTCTTGGTTCTCGCATCGATGAAGAACGCAGCGAAATGCGATAAGTAA 322

Query 288 TATGAATTGCAGATTTTTCGTGAATCATCGAATCTTTGAACGCACATTGCGCCCTCTGGTA 347
      |||
Sbjct 323 TATGAATTGCAGATTTTTCGTGAATCATCGAATCTTTGAACGCACATTGCGCCCTTTGGTA 382

Query 348 TTCCAGAGGGCATGCCTGTTTGAGCGTCATTTCTCTCTCAAACCCTT-GGGTTTGGTATT 406
      |||
Sbjct 383 TTCCAAAGGGCATGCCTGTTTGAGCGTCATTTCTCTCTCAAACC-TTCGGGTTTGGTATT 441

Query 407 GAGTGATACTCTTAGTCGAACTAGGCGTTTGCTTGAAATTTATTGGCATGAGTGACGCTG 466
      |||
Sbjct 442 GAGTGATACTCTTAGTCGAACTAGGCGTTTGCTTGAAATGTATTGGCATGAGTGGTACTG 501

Query 467 AGA-AGTGC-ATTCAGGAAATATCAATGTATTAGGTTTATCCAACCTCGTTGACA-ATTCT 523
      |||
Sbjct 502 -GATAGTGCTAT--ATGACTT-TCAATGTATTAGGTTTATCCAACCTCGTTGA-ATAGT-T 555

Query 524 TGGTTGTGA-ATTTTT-GGTGTT--AGGCTTTCCTTAAAAACAACAACAAGTTTGAC 579
      |||
Sbjct 556 TAATGGT-ATATTTCTCGGTATTCTAGGCTCGGCCTTACAATATAACAACAAGTTTGAC 614

Query 580 CTCAAATCAGGTAGGATTACCCGCTGAACTTAAGCATATCAATAAG-C-GGAGG 631
      |||
Sbjct 615 CTCAAATCAGGTAGGACTACCCGCTGAACTTAAGCATATCAA-AAGGCCGGAGG 667
```

>gb|EF190231.1| *Debaryomyces hansenii* strain wwl-2 18S ribosomal RNA gene, partial  
sequence; internal transcribed spacer 1, 5.8S ribosomal  
RNA gene, and internal transcribed spacer 2, complete sequence;  
and 28S ribosomal RNA gene, partial sequence  
Length=672

Score = 778 bits (421), Expect = 0.0  
Identities = 574/642 (89%), Gaps = 34/642 (5%)  
Strand=Plus/Plus

```

Query 1 TCCGTAGGTGAACCTGCGGAAGGATCATTACTGTATTCTAATTGCCAGCGCTTAATTGCG 60
      |||
Sbjct 30 TCCGTAGGTGAACCTGCGGAAGGATCATTACAGTATTCTTTTTGCCAGCGCTTAATTGCG 89

Query 61 CGGCGATTAAACCTTACACACAATGTTTTTCT-TTATTA-GA-AACTATTGCTTTGGCT- 116
      |||
Sbjct 90 CGGCGAAAAAACCTTACACACAGTGTTTTT-TGTTATTACAAGAACTCTTGCTTTGG-TC 147

Query 117 TGG-CTAAGAAATTAG-TCGGGCCAGAGGTTTAC---AC-AACTTCAATTTTTTA-ATTG 169
      |||
Sbjct 148 TGGACT-AGAAA-TAGTTTGGGCCAGAGGTTTACTAAACTAAACTTCAATATTTATATTG 205

Query 170 AATTGTTATTTAATACT--TTGTCAATTTGTTGATTAAATTCAAACAATCTTCAAACTT 227
      |||
Sbjct 206 AATTGTTATTT-ATTTTAATTGTCAATTTGTTGATTAAATTCAAAAAATCTTCAAACTT 264

Query 228 TCAACAACGGATCTCTTGGTTCTCGCATCGATGAAGAACGCAGCGAAATGCGATAAGTAA 287
      |||
Sbjct 265 TCAACAACGGATCTCTTGGTTCTCGCATCGATGAAGAACGCAGCGAAATGCGATAAGTAA 324

Query 288 TATGAATTGCAGATTTTCGTGAATCATCGAATCTTTGAACGCACATTGCGCCCTCTGGTA 347
      |||
Sbjct 325 TATGAATTGCAGATTTTCGTGAATCATCGAATCTTTGAACGCACATTGCGCCCTTTGGTA 384

Query 348 TTCCAGAGGGCATGCCTGTTTGGAGCGTCATTTCTCTCTCAAACCTT-GGGTTTGGTATT 406
      |||
Sbjct 385 TTCCAAAGGGCATGCCTGTTTGGAGCGTCATTTCTCTCTCAAACC-TTCGGGTTTGGTATT 443

Query 407 GAGTGATACTCTTAGTCGAACTAGGCGTTTGCTTGAAATTTATTGGCATGAGTGACGCTG 466
      |||
Sbjct 444 GAGTGATACTCTTAGTCGAACTAGGCGTTTGCTTGAAATGTATTGGCATGAGTGGTACTG 503

Query 467 AGA-AGTGC-ATTCAGGAAATATCAATGTATTAGGTTTATCCAACCTCGTTGACA-ATTCT 523
      |||
Sbjct 504 -GATAGTGCTAT--ATGACTT-TCAATGTATTAGGTTTATCCAACCTCGTTGA-ATAGT-T 557

Query 524 TGGTTGTGA-ATTTTT-GGTGTT--AGGCTTTCCTTAAAAACAACAACAAGTTTGAC 579
      |||
Sbjct 558 TAATGGT-ATATTTCTCGGTATTCTAGGCTCGGCCTTACAATATAACAACAAGTTTGAC 616

Query 580 CTCAAATCAGGTAGGATTACCCGCTGAACTTAAGCATATCAA 621
      |||
Sbjct 617 CTCAAATCAGGTAGGACTACCCGCTGAACTTAAGCATATCAA 658

```

>gb|EF192227.1| *Debaryomyces hansenii* strain w-14-1 18S ribosomal RNA gene, partial sequence; internal transcribed spacer 1, 5.8S ribosomal RNA gene, and internal transcribed spacer 2, complete sequence; and 28S ribosomal RNA gene, partial sequence  
Length=642

Score = 778 bits (421), Expect = 0.0  
Identities = 574/642 (89%), Gaps = 34/642 (5%)  
Strand=Plus/Plus

```

Query 1 TCCGTAGGTGAACCTGCGGAAGGATCATTACTGTATTCTAATTGCCAGCGCTTAATTGCG 60
      |||
Sbjct 12 TCCGTAGGTGAACCTGCGGAAGGATCATTACAGTATTCTTTTTGCCAGCGCTTAATTGCG 71

Query 61 CGGCGATTAAACCTTACACACAATGTTTTTCT-TTATTA-GA-AACTATTGCTTTGGCT- 116
      |||
Sbjct 72 CGGCGAAAAAACCTTACACACAGTGTTTTT-TGTTATTACAAGAACTCTTGCTTTGG-TC 129

Query 117 TGG-CTAAGAAATTAG-TCGGGCCAGAGGTTTAC---AC-AACTTCAATTTTTTA-ATTG 169

```

```

Sbjct 130  ||| || ||||| ||| | ||||| ||||| ||| ||| ||||| ||||| ||||| ||||| 187
          TGGACT-AGAAA-TAGTTTGGGCCAGAGGTTTACTAAACTAAACTTCAATATTTATATTG
Query 170  AATTGTTATTTAATACT--TTGTCAATTTGTTGATTAAATTCAAACAATCTTCAAACCTT 227
          ||||| ||||| ||| | ||||| ||||| ||||| ||||| ||||| ||||| |||||
Sbjct 188  AATTGTTATTT-ATTTTAATTGTCAATTTGTTGATTAAATTCAAAAAATCTTCAAACCTT 246
          ||||| ||||| ||||| ||||| ||||| ||||| ||||| ||||| ||||| |||||
Query 228  TCAACAACGGATCTCTTGGTTCTCGCATCGATGAAGAACGCAGCGAAATGCGATAAGTAA 287
          ||||| ||||| ||||| ||||| ||||| ||||| ||||| ||||| ||||| |||||
Sbjct 247  TCAACAACGGATCTCTTGGTTCTCGCATCGATGAAGAACGCAGCGAAATGCGATAAGTAA 306
          ||||| ||||| ||||| ||||| ||||| ||||| ||||| ||||| ||||| |||||
Query 288  TATGAATTGCAGATTTTTCGTGAATCATCGAATCTTTGAACGCACATTGCGCCCTCTGGTA 347
          ||||| ||||| ||||| ||||| ||||| ||||| ||||| ||||| ||||| |||||
Sbjct 307  TATGAATTGCAGATTTTTCGTGAATCATCGAATCTTTGAACGCACATTGCGCCCTTTGGTA 366
          ||||| ||||| ||||| ||||| ||||| ||||| ||||| ||||| ||||| |||||
Query 348  TTCCAGAGGGCATGCCTGTTTGAGCGTCATTTCTCTCTCAAACCCTT-GGGTTTGGTATT 406
          ||||| ||||| ||||| ||||| ||||| ||||| ||||| ||||| ||||| |||||
Sbjct 367  TTCCAAAGGGCATGCCTGTTTGAGCGTCATTTCTCTCTCAAACC-TTCGGGTTTGGTATT 425
          ||||| ||||| ||||| ||||| ||||| ||||| ||||| ||||| ||||| |||||
Query 407  GAGTGATACTCTTAGTCGAACTAGGCGTTTGCTTGAAATTTATTGGCATGAGTGACGCTG 466
          ||||| ||||| ||||| ||||| ||||| ||||| ||||| ||||| ||||| |||||
Sbjct 426  GAGTGATACTCTTAGTCGAACTAGGCGTTTGCTTGAAATGTATTGGCATGAGTGGTACTG 485
          ||||| ||||| ||||| ||||| ||||| ||||| ||||| ||||| ||||| |||||
Query 467  AGA-AGTGC-ATTCAGGAAATATCAATGTATTAGGTTTATCCAACCTCGTTGACA-ATTCT 523
          || ||||| || | || | ||||| ||||| ||||| ||||| ||||| |||||
Sbjct 486  -GATAGTGCTAT--ATGACTT-TCAATGTATTAGGTTTATCCAACCTCGTTGA-ATAGT-T 539
          ||||| ||||| ||||| ||||| ||||| ||||| ||||| ||||| ||||| |||||
Query 524  TGGTTGTGA-ATTTTT-GGTGTT--AGGCTTTCCTTAAAAACAACAACAAGTTTGAC 579
          | | | | | | | | | | | | | | | | | | | | | | | | | | | | | | |
Sbjct 540  TAATGGT-ATATTTCTCGGTATTCTAGGCTCGGCCTTACAATATAACAACAAGTTTGAC 598
          ||||| ||||| ||||| ||||| ||||| ||||| ||||| ||||| ||||| |||||
Query 580  CTCAAATCAGGTAGGATTACCCGCTGAACTTAAGCATATCAA 621
          ||||| ||||| ||||| ||||| ||||| ||||| ||||| ||||| |||||
Sbjct 599  CTCAAATCAGGTAGGACTACCCGCTGAACTTAAGCATATCAA 640
          ||||| ||||| ||||| ||||| ||||| ||||| ||||| ||||| |||||

```

>gb|FJ153162.1| Candida sp. SG6L02 18S ribosomal RNA gene, partial sequence; internal transcribed spacer 1, 5.8S ribosomal RNA gene, and internal transcribed spacer 2, complete sequence; and 28S ribosomal RNA gene, partial sequence  
Length=579

Score = 776 bits (420), Expect = 0.0  
Identities = 542/596 (90%), Gaps = 28/596 (4%)  
Strand=Plus/Plus

```

Query 48  GCGCTTAATTGCGCGGCGATTAAACCTTACACACAATGTTTTTCT-TTATTAGAACTAT 106
          ||||| ||||| ||||| ||||| ||||| ||||| ||||| ||||| ||||| |||||
Sbjct 1  GCGCTTAATTGCGCGGCGA-AAAACCTTACACACAGTGTTTTT-TGTT-TTACAAACCAT 57
          ||||| ||||| ||||| ||||| ||||| ||||| ||||| ||||| ||||| |||||
Query 107  TGCTTTGGCTTGGCTAAGAAATTA-GTCGGGCCAGAGGTTTACAC-AAACTTCAAT-TTT 163
          ||||| ||||| ||||| ||||| ||||| ||||| ||||| ||||| ||||| |||||
Sbjct 58  TGCTTTGGCTTGGCTTAGAAA-TAGGTTGGGCCAAAGGTTTACACTAAACTTCAATATTT 116
          ||||| ||||| ||||| ||||| ||||| ||||| ||||| ||||| ||||| |||||
Query 164  TAATTGAATTGTTATTT-AATACTTTGTCAATTTGTTGATTAAATTCAAACAATCTTCAA 222
          | | | | | | | | | | | | | | | | | | | | | | | | | | | | | | |
Sbjct 117  T-ATTGAATTGTT-TTTAAATATTTTGTCAATTTGTTGATTAAATTCAA-AATCTTCAA 173
          ||||| ||||| ||||| ||||| ||||| ||||| ||||| ||||| ||||| |||||
Query 223  AACTTTCAACAACGGATCTCTTGGTTCTCGCATCGATGAAGAACGCAGCGAAATGCGATA 282
          ||||| ||||| ||||| ||||| ||||| ||||| ||||| ||||| ||||| |||||
Sbjct 174  AACTTTCAACAACGGATCTCTTGGTTCTCGCATCGATGAAGAACGCAGCGAAATGCGATA 233
          ||||| ||||| ||||| ||||| ||||| ||||| ||||| ||||| ||||| |||||
Query 283  AGTAATATGAATTGCAGATTTTTCGTGAATCATCGAATCTTTGAACGCACATTGCGCCCTC 342
          ||||| ||||| ||||| ||||| ||||| ||||| ||||| ||||| ||||| |||||

```





Query 580 CTCAAATCAGGTAGGATTACCCGCTGAACTTAAGCATATCA 620  
 |||  
 Sbjct 600 CTCAAATCAGGTAGGACTACCCGCTGAACTTAAGCATATCA 640

>gb|EF197944.1| Debaryomyces hansenii strain WC56-1 18S ribosomal RNA gene, partial sequence; internal transcribed spacer 1, 5.8S ribosomal RNA gene, and internal transcribed spacer 2, complete sequence; and 28S ribosomal RNA gene, partial sequence  
 Length=657

Score = 776 bits (420), Expect = 0.0  
 Identities = 573/641 (89%), Gaps = 34/641 (5%)  
 Strand=Plus/Plus

Query 1 TCCGTAGGTGAACCTGCGGAAGGATCATTACTGTATTCTAATTGCCAGCGCTTAATTGCG 60  
 |||  
 Sbjct 28 TCCGTAGGTGAACCTGCGGAAGGATCATTACAGTATTCTTTTGGCCAGCGCTTAATTGCG 87

Query 61 CGGCGATTAAACCTTACACACAATGTTTTTCT-TTATTA-GA-AACTATTGCTTTGGCT- 116  
 |||  
 Sbjct 88 CGGCGAAAAAACCTTACACACAGTGTTTTT-TGTTATTACAAGAACTCTTGCTTTGG-TC 145

Query 117 TGG-CTAAGAAATTAG-TCGGGCCAGAGGTTTAC---AC-AACTTCAATTTTTA-ATTG 169  
 |||  
 Sbjct 146 TGGACT-AGAAA-TAGTTTGGGCCAGAGGTTTACTAAACTAAACTTCAATATTTATATTG 203

Query 170 AATTGTTATTTAATACT--TTGTCAATTTGTTGATTAAATTCAAACAATCTTCAAACCTT 227  
 |||  
 Sbjct 204 AATTGTTATTT-ATTTAATTGTCAATTTGTTGATTAAATTCAAAAAATCTTCAAACCTT 262

Query 228 TCAACAACGGATCTCTTGGTTCTCGCATCGATGAAGAACGCAGCGAAATGCGATAAGTAA 287  
 |||  
 Sbjct 263 TCAACAACGGATCTCTTGGTTCTCGCATCGATGAAGAACGCAGCGAAATGCGATAAGTAA 322

Query 288 TATGAATTGCAGATTTTCGTGAATCATCGAATCTTTGAACGCACATTGCGCCCTCTGGTA 347  
 |||  
 Sbjct 323 TATGAATTGCAGATTTTCGTGAATCATCGAATCTTTGAACGCACATTGCGCCCTTTGGTA 382

Query 348 TTCCAGAGGGCATGCCTGTTTGAGCGTCATTTCTCTCTCAAACCCTT-GGGTTTGGTATT 406  
 |||  
 Sbjct 383 TTCCAAAGGGCATGCCTGTTTGAGCGTCATTTCTCTCTCAAACC-TTCGGGTTTGGTATT 441

Query 407 GAGTGATACTCTTAGTCGAACTAGGCGTTTGCTTGAATTTATTGGCATGAGTGACGCTG 466  
 |||  
 Sbjct 442 GAGTGATACTCTTAGTCGAACTAGGCGTTTGCTTGAATGTATTGGCATGAGTGGTACTG 501

Query 467 AGA-AGTGC-ATTCAGGAAATATCAATGTATTAGGTTTATCCAACCTCGTTGACA-ATTCT 523  
 |||  
 Sbjct 502 -GATAGTGCTAT--ATGACTT-TCAATGTATTAGGTTTATCCAACCTCGTTGA-ATAGT-T 555

Query 524 TGGTTGTGA-ATTTTT-GGTGTT--AGGCTTTCCTTAAAAACAACAACAAGTTTGAC 579  
 |||  
 Sbjct 556 TAATGGT-ATATTTCTCGGTATTCTAGGCTCGGCCTTACAATATAACAACAAGTTTGAC 614

Query 580 CTCAAATCAGGTAGGATTACCCGCTGAACTTAAGCATATCA 620  
 |||  
 Sbjct 615 CTCAAATCAGGTAGGACTACCCGCTGAACTTAAGCATATCA 655

Number of letters in database: 1,817,769,445  
Number of sequences in database: 12,090,198

| Lambda | K     | H    |
|--------|-------|------|
| 1.33   | 0.621 | 1.12 |

Gapped

| Lambda | K     | H     |
|--------|-------|-------|
| 1.28   | 0.460 | 0.850 |

Matrix: blastn matrix:1 -2

Gap Penalties: Existence: 0, Extension: 0

Number of Sequences: 12090198

Number of Hits to DB: 2155225

Number of extensions: 11315

Number of successful extensions: 11315

Number of sequences better than 10: 8423

Number of HSP's better than 10 without gapping: 0

Number of HSP's gapped: 11065

Number of HSP's successfully gapped: 11064

Length of query: 632

Length of database: 31882540517

Length adjustment: 32

Effective length of query: 600

Effective length of database: 31495654181

Effective search space: 18897392508600

Effective search space used: 18897392508600

A: 0

X1: 14 (26.9 bits)

X2: 32 (59.1 bits)

X3: 54 (99.7 bits)

S1: 14 (27.0 bits)

S2: 22 (41.7 bits)



BLASTN 2.2.23+

Reference: Zheng Zhang, Scott Schwartz, Lukas Wagner, and Webb Miller (2000), "A greedy algorithm for aligning DNA sequences", J Comput Biol 2000; 7(1-2):203-14.

RID: 2DEPU2RJ016

Database: All GenBank+EMBL+DDBJ+PDB sequences (but no EST, STS, GSS, environmental samples or phase 0, 1 or 2 HTGS sequences)

12,090,198 sequences; 31,882,540,517 total letters

Query= gi|259018353|gb|GQ458041.1| Debaryomyces hansenii strain ATCC 60978 18S ribosomal RNA gene, partial sequence; internal transcribed spacer 1, 5.8S ribosomal RNA gene, and internal transcribed spacer 2, complete sequence; and 28S ribosomal RNA gene, partial sequence  
Length=2961

| Sequences producing significant alignments:                      | Score<br>(Bits) | E<br>Value |
|------------------------------------------------------------------|-----------------|------------|
| gb GQ458041.1  Debaryomyces hansenii strain ATCC 60978 18S ri... | 5465            | 0.0        |
| gb GQ458025.1  Debaryomyces hansenii strain MA09-AK 18S ribos... | 5446            | 0.0        |
| gb GQ458019.1  Debaryomyces hansenii strain MA09-J 18S riboso... | 5421            | 0.0        |
| gb CP000497.1  Pichia stipitis CBS 6054 chromosome 3, complet... | 4776            | 0.0        |
| dbj AB285026.1  Candida sp. BCMU BX03 genes for 18S rRNA, ITS... | 4119            | 0.0        |
| gb AY845351.1  Candida lignicola 18S ribosomal RNA gene, part... | 3419            | 0.0        |
| dbj AB013590.1  Debaryomyces hansenii var. hansenii 18S rRNA ... | 3230            | 0.0        |
| dbj AB013568.1  Debaryomyces hansenii var. hansenii 18S rRNA ... | 3230            | 0.0        |
| dbj AB013567.1  Debaryomyces hansenii var. fabryi 18S rRNA ge... | 3225            | 0.0        |
| emb X58053.1  D.hansenii gene for 18S ribosomal RNA              | 3217            | 0.0        |
| dbj AB013587.1  Pichia guilliermondii 18S rRNA gene, strain J... | 3203            | 0.0        |
| dbj AB013566.1  Candida fukuyamaensis 18S rRNA gene, strain J... | 3203            | 0.0        |
| dbj AB013517.1  Candida xestobii 18S rRNA gene, strain JCM 95... | 3203            | 0.0        |
| dbj AB013528.1  Candida psychrophila 18S rRNA gene, strain JC... | 3201            | 0.0        |
| emb X62649.1  D.hansenii 17S rDNA                                | 3192            | 0.0        |
| dbj AB070854.1  Debaryomyces hansenii gene for 18S rRNA, part... | 3188            | 0.0        |
| dbj AB106349.1  Debaryomyces hansenii var. hansenii gene for ... | 3188            | 0.0        |
| dbj AB013525.1  Candida fermenticarens 18S rRNA gene, strain ... | 3186            | 0.0        |
| gb AY520288.1  Candida sp. BG02-6-6-2-1 18S ribosomal RNA gen... | 3182            | 0.0        |
| gb AY518523.1  Candida athensensis strain BG02-7-13-014-3-1 1... | 3181            | 0.0        |
| dbj AB013513.1  Pichia farinosa 18S rRNA gene, strain JCM 889... | 3177            | 0.0        |
| dbj AB022440.1  Debaryomyces sp. MBIC4210 gene for 18S rRNA, ... | 3171            | 0.0        |
| gb AY518520.1  Candida smithsonii strain BG02-7-13-007B-1-2 1... | 3168            | 0.0        |
| gb AY242150.1  Candida sp. BG99-8-11-1-4-1 18S ribosomal RNA ... | 3164            | 0.0        |
| gb AY518522.1  Candida athensensis strain BG02-5-23-003I-4 18... | 3162            | 0.0        |
| dbj AB013546.1  Candida laureliae 18S rRNA gene, strain JCM 8... | 3162            | 0.0        |
| emb X83821.1  Debaryomyces udonii 18S rRNA gene (NCYC 2394)      | 3162            | 0.0        |
| gb EF194890.1  Pichia guilliermondii strain HJM 18S ribosomal... | 3157            | 0.0        |
| gb DQ534400.1  Debaryomyces hansenii strain WHCX-1 18S riboso... | 3157            | 0.0        |
| dbj AB054277.1  Debaryomyces prosopidis gene for 18S rRNA, pa... | 3157            | 0.0        |
| dbj AB054269.1  Debaryomyces hansenii var. fabryi gene for 18... | 3157            | 0.0        |
| dbj AB013555.1  Candida krissii 18S rRNA gene, strain JCM 945... | 3157            | 0.0        |
| dbj AB013553.1  Candida ralunensis 18S rRNA gene, strain JCM ... | 3157            | 0.0        |
| dbj AB013537.1  Candida schatavii 18S rRNA gene, strain JCM 1... | 3157            | 0.0        |
| dbj AB013532.1  Candida boleticola 18S rRNA gene, strain JCM ... | 3157            | 0.0        |
| dbj AB013509.1  Candida zeylanoides 18S rRNA gene, strain JCM... | 3157            | 0.0        |
| gb DQ534402.1  Debaryomyces hansenii strain hcX-1 18S ribosom... | 3153            | 0.0        |
| dbj AB054261.1  Debaryomyces maramus gene for 18S rRNA, parti... | 3153            | 0.0        |
| gb AF440017.1  Debaryomyces mycophilus 18S ribosomal RNA gene... | 3151            | 0.0        |
| dbj AB054272.1  Debaryomyces coudertii gene for 18S rRNA, par... | 3151            | 0.0        |
| dbj AB013562.1  Candida beechii 18S rRNA gene, strain JCM 180... | 3151            | 0.0        |
| dbj AB054270.1  Debaryomyces hansenii var. hansenii gene for ... | 3147            | 0.0        |

|                |                                                   |      |     |
|----------------|---------------------------------------------------|------|-----|
| gb AY520262.1  | Candida sp. BG02-7-14-001H-1-1 18S ribosomal R... | 3145 | 0.0 |
| dbj AB054271.1 | Debaryomyces nepalensis gene for 18S rRNA, pa...  | 3142 | 0.0 |
| gb AY553853.1  | Candida fermentati strain NRRL Y-17903 18S rib... | 3142 | 0.0 |
| gb EF428134.1  | Debaryomyces hansenii strain shiziwei2 18S rib... | 3140 | 0.0 |
| dbj AB013581.1 | Candida santamariae var. membranifaciens 18S ...  | 3140 | 0.0 |
| dbj AB013536.1 | Candida santamariae var. santamariae 18S rRNA...  | 3138 | 0.0 |
| dbj AB013534.1 | Candida oleophila 18S rRNA gene, strain JCM 1...  | 3138 | 0.0 |
| emb FN690502.1 | Uncultured fungus partial 18S rRNA gene, clon...  | 3136 | 0.0 |
| dbj AB054259.1 | Debaryomyces robertsiae gene for 18S rRNA, pa...  | 3136 | 0.0 |
| dbj AB070856.1 | Marine yeast Y5318 gene for 18S rRNA, partial...  | 3136 | 0.0 |
| dbj AB106351.1 | Debaryomyces hansenii gene for 18S rRNA, part...  | 3136 | 0.0 |
| emb AJ508273.1 | Debaryomyces hansenii partial 18S rRNA gene, ...  | 3134 | 0.0 |
| dbj AB054268.1 | Debaryomyces udenii gene for 18S rRNA, partia...  | 3133 | 0.0 |
| emb X83819.1   | Debaryomyces castellii 18S rRNA gene (NCYC 604)   | 3133 | 0.0 |
| dbj AB054266.1 | Debaryomyces yamadae gene for 18S rRNA, parti...  | 3131 | 0.0 |
| gb AY520192.1  | Candida sp. BG02-7-14-001I-1-1 18S ribosomal R... | 3131 | 0.0 |
| dbj AB054274.1 | Debaryomyces vanrijiae gene for 18S rRNA, par...  | 3127 | 0.0 |
| dbj AB105434.1 | Pichia guilliermondii gene for 18S rRNA, part...  | 3127 | 0.0 |
| gb AY520212.1  | Candida sp. BG02-6-15-010A-3 18S ribosomal RNA... | 3125 | 0.0 |
| dbj AB013542.1 | Candida sophiae-reginae 18S rRNA gene, strain...  | 3123 | 0.0 |
| dbj AB013535.1 | Candida multigemmis 18S rRNA gene, strain JCM...  | 3120 | 0.0 |
| dbj AB013519.1 | Candida glucosophila 18S rRNA gene, strain JC...  | 3120 | 0.0 |
| dbj AB054267.1 | Debaryomyces vanrijiae var. yarrowii gene for...  | 3118 | 0.0 |
| gb AY242152.1  | Candida athensensis strain BG99-8-11-1-C1 18S ... | 3118 | 0.0 |
| dbj AB013579.1 | Candida quercitrusa 18S rRNA gene, strain JCM...  | 3118 | 0.0 |
| dbj AB013541.1 | Candida natalensis 18S rRNA gene, strain JCM ...  | 3118 | 0.0 |
| gb DQ534404.1  | Debaryomyces hansenii strain JHSa 18S ribosoma... | 3114 | 0.0 |
| gb AY520250.1  | Candida sp. BG02-5-27-4-5-1 18S ribosomal RNA ... | 3114 | 0.0 |
| dbj AB054263.1 | Debaryomyces occidentalis var. persoonii gene...  | 3112 | 0.0 |
| dbj AB054276.1 | Debaryomyces castellii gene for 18S rRNA, par...  | 3109 | 0.0 |
| gb AY520269.1  | Candida sp. BG02-5-27-4-2-1 18S ribosomal RNA ... | 3109 | 0.0 |
| gb AY520264.1  | Candida sp. BG02-7-18-022A-1-1 18S ribosomal R... | 3109 | 0.0 |
| gb EF532297.1  | Pichia guilliermondii strain gaolzhong2 18S ri... | 3107 | 0.0 |
| gb EF061756.1  | Debaryomyces hansenii strain G7a1 18S ribosoma... | 3107 | 0.0 |
| gb DQ534403.1  | Pichia guilliermondii strain JHSd 18S ribosoma... | 3105 | 0.0 |
| dbj AB054282.1 | Pichia guilliermondii gene for 18S rRNA, part...  | 3105 | 0.0 |
| dbj AB000950.1 | Taphrina farlowii gene for 18S rRNA, complete...  | 3105 | 0.0 |
| gb EU784644.1  | Pichia guilliermondii strain CXF-1 18S ribosom... | 3103 | 0.0 |
| dbj AB013573.1 | Candida fragi 18S rRNA gene, strain JCM 1791,...  | 3101 | 0.0 |
| emb FN690501.1 | Uncultured fungus partial 18S rRNA gene, clon...  | 3097 | 0.0 |
| dbj AB054275.1 | Debaryomyces polymorphus gene for 18S rRNA, p...  | 3097 | 0.0 |
| dbj AB054273.1 | Debaryomyces pseudopolymorphus gene for 18S r...  | 3097 | 0.0 |
| dbj AB054265.1 | Debaryomyces polymorphus var. africanus gene ...  | 3097 | 0.0 |
| gb AY520271.1  | Candida sp. BG02-5-27-1-2-C 18S ribosomal RNA ... | 3097 | 0.0 |
| dbj AB054262.1 | Debaryomyces occidentalis gene for 18S rRNA, ...  | 3096 | 0.0 |
| gb GU570441.1  | Candida sp. NN-2010a 18S ribosomal RNA gene, p... | 3092 | 0.0 |
| emb AJ508276.1 | Pichia caribbica partial 18S rRNA gene, strai...  | 3092 | 0.0 |
| gb AY227715.1  | Candida xestobii strain ATCC 24001 18S ribosom... | 3090 | 0.0 |
| gb AY242159.1  | Candida sp. BG01-7-21-003B-1-1 18S ribosomal R... | 3090 | 0.0 |
| dbj AB054258.1 | Debaryomyces etchellsii gene for 18S rRNA, pa...  | 3086 | 0.0 |
| gb AY227020.1  | Pichia guilliermondii strain CCO 8 18S ribosom... | 3086 | 0.0 |
| gb AY520226.1  | Candida sp. BG02-5-23-003D-5 18S ribosomal RNA... | 3086 | 0.0 |
| emb AJ508269.1 | Pichia caribbica partial 18S rRNA gene, strai...  | 3086 | 0.0 |
| gb AY242197.1  | Candida sp. BG01-7-21-009A-1-1 18S ribosomal R... | 3083 | 0.0 |
| emb AJ508270.1 | Candida carpophila partial 18S rRNA gene, str...  | 3083 | 0.0 |
| emb AM261069.1 | Debaryomyces sp. MTCC 7061 18S rRNA gene, str...  | 3079 | 0.0 |
| gb DQ499512.1  | Candida sp. ny4e 18S ribosomal RNA gene, parti... | 3077 | 0.0 |
| gb DQ438179.1  | Candida sp. N12C 18S ribosomal RNA gene, parti... | 3077 | 0.0 |

#### ALIGNMENTS

>gb|GQ458041.1| Debaryomyces hansenii strain ATCC 60978 18S ribosomal RNA gene, partial sequence; internal transcribed spacer 1, 5.8S ribosomal RNA gene, and internal transcribed spacer 2, complete sequence; and 28S ribosomal RNA gene, partial sequence



|       |      |                                                               |      |
|-------|------|---------------------------------------------------------------|------|
| Sbjct | 841  | GTATTCAGTTGTCAGAGGTGAAATTCTTGGATTACCTGAAGACTAACTACTGCGAAAGCA  | 900  |
| Query | 901  | TTTGCCAAGGACGTTTTTCATTAATCAAGAACGAAAGTTAGGGGATCGAAGATGATCAGAT | 960  |
| Sbjct | 901  | TTTGCCAAGGACGTTTTTCATTAATCAAGAACGAAAGTTAGGGGATCGAAGATGATCAGAT | 960  |
| Query | 961  | ACCGTCGTAGTCTTAACCATAAACTATGCCGACTAGGGATCGGGTGTGTTCTtttttttG  | 1020 |
| Sbjct | 961  | ACCGTCGTAGTCTTAACCATAAACTATGCCGACTAGGGATCGGGTGTGTTCTTTTTTTTG  | 1020 |
| Query | 1021 | ACGCACTCGGCACCTTACGAGAAATCAAAGTCTTTGGGTTCTGGGGGAGTATGGTCGCA   | 1080 |
| Sbjct | 1021 | ACGCACTCGGCACCTTACGAGAAATCAAAGTCTTTGGGTTCTGGGGGAGTATGGTCGCA   | 1080 |
| Query | 1081 | AGGCTGAAACTTAAAGGAATTGACGGAAGGGCACCACCAGGAGTGGAGCCTGCGGCTTAA  | 1140 |
| Sbjct | 1081 | AGGCTGAAACTTAAAGGAATTGACGGAAGGGCACCACCAGGAGTGGAGCCTGCGGCTTAA  | 1140 |
| Query | 1141 | TTTGACTCAACACGGGGAAACTCACCAGGTCCAGACACAATAAGGATTGACAGATTGAGA  | 1200 |
| Sbjct | 1141 | TTTGACTCAACACGGGGAAACTCACCAGGTCCAGACACAATAAGGATTGACAGATTGAGA  | 1200 |
| Query | 1201 | GCTCTTTCTTGATTTTGTGGGTGGTGGTGCATGGCCGTTCTTAGTTGGTGGAGTGATTTG  | 1260 |
| Sbjct | 1201 | GCTCTTTCTTGATTTTGTGGGTGGTGGTGCATGGCCGTTCTTAGTTGGTGGAGTGATTTG  | 1260 |
| Query | 1261 | TCTGCTTAATTGCGATAACGAACGAGACCTTAACCTACTAAATAGTGCTGCTAGCTTTTG  | 1320 |
| Sbjct | 1261 | TCTGCTTAATTGCGATAACGAACGAGACCTTAACCTACTAAATAGTGCTGCTAGCTTTTG  | 1320 |
| Query | 1321 | CTGGTATAGTCACTTCTTAGAGGGACTATCGATTTCAAGTCGATGGAAGTTTGAGGCAAT  | 1380 |
| Sbjct | 1321 | CTGGTATAGTCACTTCTTAGAGGGACTATCGATTTCAAGTCGATGGAAGTTTGAGGCAAT  | 1380 |
| Query | 1381 | AACAGGTCTGTGATGCCCTTAGACGTTCTGGGCCGCACGCGCTACACTGACGGAGCCA    | 1440 |
| Sbjct | 1381 | AACAGGTCTGTGATGCCCTTAGACGTTCTGGGCCGCACGCGCTACACTGACGGAGCCA    | 1440 |
| Query | 1441 | ACGAGTATTAACCTTGGCCGAGAGGTCTGGGAAATCTTGTGAAACTCCGTCGTGCTGGGG  | 1500 |
| Sbjct | 1441 | ACGAGTATTAACCTTGGCCGAGAGGTCTGGGAAATCTTGTGAAACTCCGTCGTGCTGGGG  | 1500 |
| Query | 1501 | ATAGAGCATTGTAATTATTGCTCTTCAACGAGGAATTCCTAGTAAGCGCAAGTCATCAGC  | 1560 |
| Sbjct | 1501 | ATAGAGCATTGTAATTATTGCTCTTCAACGAGGAATTCCTAGTAAGCGCAAGTCATCAGC  | 1560 |
| Query | 1561 | TTGCGTTGATTACGTCCCTGCCCTTTGTACACACCGCCCGTCGCTACTACCGATTGAATG  | 1620 |
| Sbjct | 1561 | TTGCGTTGATTACGTCCCTGCCCTTTGTACACACCGCCCGTCGCTACTACCGATTGAATG  | 1620 |
| Query | 1621 | GCTTAGTGAGGCCTCCGGATTGGTTTAAAGAAGGGGGCAACTCCATCTTGAACCGAAAA   | 1680 |
| Sbjct | 1621 | GCTTAGTGAGGCCTCCGGATTGGTTTAAAGAAGGGGGCAACTCCATCTTGAACCGAAAA   | 1680 |
| Query | 1681 | GCTGGTCAAACCTGGTCATTTAGAGGAAGTAAAAGTCGTAACAAGTTTCCGTAGGTGAA   | 1740 |
| Sbjct | 1681 | GCTGGTCAAACCTGGTCATTTAGAGGAAGTAAAAGTCGTAACAAGTTTCCGTAGGTGAA   | 1740 |
| Query | 1741 | CCTGCGGAAGGATCATTACAGTATTCTTTTTGCCAGCGCTTAATTGCGCGGCGAAAAAAC  | 1800 |
| Sbjct | 1741 | CCTGCGGAAGGATCATTACAGTATTCTTTTTGCCAGCGCTTAATTGCGCGGCGAAAAAAC  | 1800 |
| Query | 1801 | CTTACACACAGTGTTTTTTGTATTACAAGAACTTTTGCTTTGGTCTGGACTAGAAATAG   | 1860 |

|       |      |                                                               |      |
|-------|------|---------------------------------------------------------------|------|
| Sbjct | 1801 | CTTACACACAGTGT                                                | 1860 |
| Query | 1861 | TTTGGGCCAGAGGTTTACTGAACTAAACTTCAATATTTATATTGAATTGTTATTTATTTA  | 1920 |
| Sbjct | 1861 | TTTGGGCCAGAGGTTTACTGAACTAAACTTCAATATTTATATTGAATTGTTATTTATTTA  | 1920 |
| Query | 1921 | ATTGTCAATTTGTTGATTAAATTCAAAAAATCTTCAAAACTTTCAACAACGGATCTCTTG  | 1980 |
| Sbjct | 1921 | ATTGTCAATTTGTTGATTAAATTCAAAAAATCTTCAAAACTTTCAACAACGGATCTCTTG  | 1980 |
| Query | 1981 | GTTCTCGCATCGATGAAGAACGCAGCGAAATGCGATAAGTAATATGAATTGCAGATTTTC  | 2040 |
| Sbjct | 1981 | GTTCTCGCATCGATGAAGAACGCAGCGAAATGCGATAAGTAATATGAATTGCAGATTTTC  | 2040 |
| Query | 2041 | GTGAATCATCGAATCTTTGAACGCACATTGCGCCCTCTGGTATTCCAGAGGGCATGCCTG  | 2100 |
| Sbjct | 2041 | GTGAATCATCGAATCTTTGAACGCACATTGCGCCCTCTGGTATTCCAGAGGGCATGCCTG  | 2100 |
| Query | 2101 | TTTGAGCGTCATTTCTCTCTCAAACCTTCGGGTTTGGTATTGAGTGATACTCTTAGTTGA  | 2160 |
| Sbjct | 2101 | TTTGAGCGTCATTTCTCTCTCAAACCTTCGGGTTTGGTATTGAGTGATACTCTTAGTTGA  | 2160 |
| Query | 2161 | ACTAGGCGTTTGCTTGAAATGTATTGGCATGAGTGGTACTGGATAGTGCTATATGACTTT  | 2220 |
| Sbjct | 2161 | ACTAGGCGTTTGCTTGAAATGTATTGGCATGAGTGGTACTGGATAGTGCTATATGACTTT  | 2220 |
| Query | 2221 | CAATGTATTAGGTTTATCCAACCTCGTTGAATAGTTTAATGGTATATTTCTCGGTATTCTA | 2280 |
| Sbjct | 2221 | CAATGTATTAGGTTTATCCAACCTCGTTGAATAGTTTAATGGTATATTTCTCGGTATTCTA | 2280 |
| Query | 2281 | GGCTCGGCCTTACAATATAACAAACAAGTTTGACCTCAAATCAGGTAGGATTACCCGCTG  | 2340 |
| Sbjct | 2281 | GGCTCGGCCTTACAATATAACAAACAAGTTTGACCTCAAATCAGGTAGGATTACCCGCTG  | 2340 |
| Query | 2341 | AACTTAAGCATATCAATAAGCGGAGGAAAAGAAACCAACAGGGATTGCCTTAGTAACGGC  | 2400 |
| Sbjct | 2341 | AACTTAAGCATATCAATAAGCGGAGGAAAAGAAACCAACAGGGATTGCCTTAGTAACGGC  | 2400 |
| Query | 2401 | GAGTGAAGCGGCAAAGCTCAAATTTGAAATCTGGCACCTTCGGTGTCCGAGTTGTAATT   | 2460 |
| Sbjct | 2401 | GAGTGAAGCGGCAAAGCTCAAATTTGAAATCTGGCACCTTCGGTGTCCGAGTTGTAATT   | 2460 |
| Query | 2461 | TGAAGAAGGTAAC                                                 | 2520 |
| Sbjct | 2461 | TGAAGAAGGTAAC                                                 | 2520 |
| Query | 2521 | GGGTGAGAATCCCGTGCATGAGATGCCAATTCTATGTAAAGTGCTTTCGAAGAGTCGA    | 2580 |
| Sbjct | 2521 | GGGTGAGAATCCCGTGCATGAGATGCCAATTCTATGTAAAGTGCTTTCGAAGAGTCGA    | 2580 |
| Query | 2581 | GTTGTTTGGGAATGCAGCTCTAAGTGGTGGTAAATTCCATCTAAAGCTAAATATTGGCG   | 2640 |
| Sbjct | 2581 | GTTGTTTGGGAATGCAGCTCTAAGTGGTGGTAAATTCCATCTAAAGCTAAATATTGGCG   | 2640 |
| Query | 2641 | AGAGACCGATAGCGAACAAGTACAGTGATGAAAGATGAAAAGAACTTTGAAAAGAGAGT   | 2700 |
| Sbjct | 2641 | AGAGACCGATAGCGAACAAGTACAGTGATGAAAGATGAAAAGAACTTTGAAAAGAGAGT   | 2700 |
| Query | 2701 | GAAAAGTACGTGAAATTGTTGAAAGGGAAGGGCTTGAGATCAGACTTGGTATTTTGCGA   | 2760 |
| Sbjct | 2701 | GAAAAGTACGTGAAATTGTTGAAAGGGAAGGGCTTGAGATCAGACTTGGTATTTTGCGA   | 2760 |
| Query | 2761 | TCCTTTCTTCTTGGTTGGGTTCCCTCGCAGCTTACTGGGCCAGCATCGGTTTGGATGGTA  | 2820 |

```

Sbjct 2761 TCCTTTCCTTCTTGGTTGGGTTTCCTCGCAGCTTACTGGGCCAGCATCGGTTTGGATGGTA 2820
Query 2821 GGATAATGACTAAGGAATGTGGCTCTACTTCGGTGGAGTGTTATAGCCTTGGTTGATACT 2880
      |||
Sbjct 2821 GGATAATGACTAAGGAATGTGGCTCTACTTCGGTGGAGTGTTATAGCCTTGGTTGATACT 2880
Query 2881 GCCTGTCTAGACCGAGGACTGCGTCTTTTGACTAGGATGTTGGCATAATGATCTTAANCC 2940
      |||
Sbjct 2881 GCCTGTCTAGACCGAGGACTGCGTCTTTTGACTAGGATGTTGGCATAATGATCTTAANCC 2940
Query 2941 ACCCGTCTGAAACACGGACCA 2961
      |||
Sbjct 2941 ACCCGTCTGAAACACGGACCA 2961

```

>gb|GQ458025.1| *Debaryomyces hansenii* strain MA09-AK 18S ribosomal RNA gene, partial sequence; internal transcribed spacer 1, 5.8S ribosomal RNA gene, and internal transcribed spacer 2, complete sequence; and 28S ribosomal RNA gene, partial sequence  
Length=2991

Score = 5446 bits (2949), Expect = 0.0  
Identities = 2958/2961 (99%), Gaps = 2/2961 (0%)  
Strand=Plus/Plus

```

Query 3 GCCATGCATGTCTAAGTATAAGCAATTTATACAGTGAAACTGCGAATGGCTCATTAAATC 62
      |||
Sbjct 25 GCCATGCATGTCTAAGTATAAGCAATTTATACAGTGAAACTGCGAATGGCTCATTAAATC 84
Query 63 AGTTATCGTTTATTTGATAGTACCTTTACTACTTGGATAA-CCGTGGTAATTCTAGAGCT 121
      |||
Sbjct 85 AGTTATCGTTTATTTGATAGTACCTTTACTACTTGGATAAACCCGTGGTAATTCTAGAGCT 144
Query 122 AATACATGCTAAAAATCCCGACTGTTTGGAAAGGGATGTATTTATTAGATAAAAAATCAAT 181
      |||
Sbjct 145 AATACATGCTAAAAATCCCGACTGTTTGGAAAGGGATGTATTTATTAGATAAAAAATCAAT 204
Query 182 GCTTTTCGGAGCTCTTTGATGATTCAATAAATTTTCGAATCGCATGGCCTTGTGCTGG 241
      |||
Sbjct 205 GCTTTTCGGAGCTCTTTGATGATTCAATAAATTTTCGAATCGCATGGCCTTGTGCTGG 264
Query 242 CGATGGTTCATTCAAATTTCTGCCCTATCAACTTTCGATGGTAGGATAGTGGCCTACCAT 301
      |||
Sbjct 265 CGATGGTTCATTCAAATTTCTGCCCTATCAACTTTCGATGGTAGGATAGTGGCCTACCAT 324
Query 302 GGTTCACACGGGTAACGGGGAATAAGGGTTCGATTCGGAGAGGGAGCCTGAGAAACGGC 361
      |||
Sbjct 325 GGTTCACACGGGTAACGGGGAATAAGGGTTCGATTCGGAGAGGGAGCCTGAGAAACGGC 384
Query 362 TACCACATCCAAGGAAGGCAGCAGGCGCGCAAATTACCCAATCCCGACACGGGGAGGTAG 421
      |||
Sbjct 385 TACCACATCCAAGGAAGGCAGCAGGCGCGCAAATTACCCAATCCCGACACGGGGAGGTAG 444
Query 422 TGACAATAAATAACGATACAGGGCCCTTTCGGGTCTTGTAATTGGAATGAGTACAATGTA 481
      |||
Sbjct 445 TGACAATAAATAACGATACAGGGCCCTTTCGGGTCTTGTAATTGGAATGAGTACAATGTA 504
Query 482 AATACCTTAACGAGGAACAATTGGAGGGCAAGTCTGGTGCCAGCAGCCGCGTAATTCCA 541
      |||
Sbjct 505 AATACCTTAACGAGGAACAATTGGAGGGCAAGTCTGGTGCCAGCAGCCGCGTAATTCCA 564
Query 542 GCTCCAATAGCGTATATTAAGTTGTTGCAGTTAAAAAGCTCGTAGTTGAACCTTGGGCT 601
      |||
Sbjct 565 GCTCCAATAGCGTATATTAAGTTGTTGCAGTTAAAAAGCTCGTAGTTGAACCTTGGGCT 624

```



|       |      |                                                                |                                               |      |
|-------|------|----------------------------------------------------------------|-----------------------------------------------|------|
| Query | 1561 | TTGCGTTGATTACGTC                                               | CCCTGCCCTTTGTACACACCGCCCGTCGCTACTACCGATTGAATG | 1620 |
|       |      |                                                                |                                               |      |
| Sbjct | 1585 | TTGCGTTGATTACGTC                                               | CCCTGCCCTTTGTACACACCGCCCGTCGCTACTACCGATTGAATG | 1644 |
| Query | 1621 | GCTTAGTGAGGCCTCCGGATTGGTTTAAAGAAGGGGGCAACTCCATCTTGGAACCGAAAA   | 1680                                          |      |
|       |      |                                                                |                                               |      |
| Sbjct | 1645 | GCTTAGTGAGGCCTCCGGATTGGTTTAAAGAAGGGGGCAACTCCATCTTGGAACCGAAAA   | 1704                                          |      |
| Query | 1681 | GCTGGTCAAACCTTGGTCATTTAGAGGAAGTAAAGTCGTAACAAGGTTTCCGTAGGTGAA   | 1740                                          |      |
|       |      |                                                                |                                               |      |
| Sbjct | 1705 | GCTGGTCAAACCTTGGTCATTTAGAGGAAGTAAAGTCGTAACAAGGTTTCCGTAGGTGAA   | 1764                                          |      |
| Query | 1741 | CCTGCGGAAGGATCATTACAGTATTCTTTTGGCCAGCGCTTAATTGCGCGGCGAAAAAAC   | 1800                                          |      |
|       |      |                                                                |                                               |      |
| Sbjct | 1765 | CCTGCGGAAGGATCATTACAGTATTCTTTTGGCCAGCGCTTAATTGCGCGGCGAAAAAAC   | 1824                                          |      |
| Query | 1801 | CTTACACACAGTGTTTTTTGTTATTACAAGAACTTTTGCTTTGGTCTGGACTAGAAATAG   | 1860                                          |      |
|       |      |                                                                |                                               |      |
| Sbjct | 1825 | CTTACACACAGTGTTTTTTGTTATTACAAGAACTTTTGCTTTGGTCTGGACTAGAAATAG   | 1884                                          |      |
| Query | 1861 | TTTGGGCCAGAGGTTTACTGAACTAAACTTCAATATTTATATTGAATTGTTATTTATTTA   | 1920                                          |      |
|       |      |                                                                |                                               |      |
| Sbjct | 1885 | TTTGGGCCAGAGGTTTACTGAACTAAACTTCAATATTTATATTGAATTGTTATTTATTTA   | 1944                                          |      |
| Query | 1921 | ATTGTCAATTTGTTGATTAAATTCAAAAAATCTTCAAACCTTTCAACAACGGATCTCTTG   | 1980                                          |      |
|       |      |                                                                |                                               |      |
| Sbjct | 1945 | ATTGTCAATTTGTTGATTAAATTCAAAAAATCTTCAAACCTTTCAACAACGGATCTCTTG   | 2004                                          |      |
| Query | 1981 | GTTCTCGCATCGATGAAGAACGCAGCGAAATGCGATAAGTAATATGAATTGCAGATTTTC   | 2040                                          |      |
|       |      |                                                                |                                               |      |
| Sbjct | 2005 | GTTCTCGCATCGATGAAGAACGCAGCGAAATGCGATAAGTAATATGAATTGCAGATTTTC   | 2064                                          |      |
| Query | 2041 | GTGAATCATCGAATCTTTGAACGCACATTGCGCCCTCTGGTATTCCAGAGGGCATGCCTG   | 2100                                          |      |
|       |      |                                                                |                                               |      |
| Sbjct | 2065 | GTGAATCATCGAATCTTTGAACGCACATTGCGCCCTCTGGTATTCCAGAGGGCATGCCTG   | 2124                                          |      |
| Query | 2101 | TTTGAGCGTCATTTCTCTCTCAAACCTTCGGGTTTGGTATTGAGTGATACTCTTAGTTGA   | 2160                                          |      |
|       |      |                                                                |                                               |      |
| Sbjct | 2125 | TTTGAGCGTCATTTCTCTCTCAAACCTTCGGGTTTGGTATTGAGTGATACTCTTAGTTGA   | 2184                                          |      |
| Query | 2161 | ACTAGGCGTTTGCTTGAAATGTATTGGCATGAGTGGTACTGGATAGTGCTATATGACTTT   | 2220                                          |      |
|       |      |                                                                |                                               |      |
| Sbjct | 2185 | ACTAGGCGTTTGCTTGAAATGTATTGGCATGAGTGGTACTGGATAGTGCTATATGACTTT   | 2244                                          |      |
| Query | 2221 | CAATGTATTAGGTTTATCCAACCTCGTTGAATAGTTTAAATGGTATATTTCTCGGTATTCTA | 2280                                          |      |
|       |      |                                                                |                                               |      |
| Sbjct | 2245 | CAATGTATTAGGTTTATCCAACCTCGTTGAATAGTTTAAATGGTATATTTCTCGGTATTCTA | 2304                                          |      |
| Query | 2281 | GGCTCGGCCTTACAATATAACAAACAAGTTTGACCTCAAATCAGGTAGGATTACCCGCTG   | 2340                                          |      |
|       |      |                                                                |                                               |      |
| Sbjct | 2305 | GGCTCGGCCTTACAATATAACAAACAAGTTTGACCTCAAATCAGGTAGGATTACCCGCTG   | 2364                                          |      |
| Query | 2341 | AACTTAAGCATATCAATAAGCGGAGGAAAAGAAACCAACAGGGATTGCCTTAGTAACGGC   | 2400                                          |      |
|       |      |                                                                |                                               |      |
| Sbjct | 2365 | AACTTAAGCATATCAATAAGCGGAGGAAAAGAAACCAACAGGGATTGCCTTAGTAACGGC   | 2424                                          |      |
| Query | 2401 | GAGTGAAGCGGCAAAGCTCAAATTTGAAATCTGGCACCTTCGGTGTCCGAGTTGTAATT    | 2460                                          |      |
|       |      |                                                                |                                               |      |
| Sbjct | 2425 | GAGTGAAGCGGCAAAGCTCAAATTTGAAATCTGGCACCTTCGGTGTCCGAGTTGTAATT    | 2484                                          |      |
| Query | 2461 | TGAAGAAGGTAACCTTTGGAGTTGGCTCTTGTCTATGTTCTTGGAACAGGACGTCACAGA   | 2520                                          |      |
|       |      |                                                                |                                               |      |
| Sbjct | 2485 | TGAAGAAGGTAACCTTTGGAGTTGGCTCTTGTCTATGTTCTTGGAACAGGACGTCACAGA   | 2544                                          |      |



```

Query 2521 GGGTGAGAATCCCGTGCGATGAGATGCCCAATTCTATGTAAAGTGCTTTCGAAGAGTCGA 2580
          |||
Sbjct 2545 GGGTGAGAATCCCGTGCGATGAGATGCCCAATTCTATGTAAAGTGCTTTCGAAGAGTCGA 2604

Query 2581 GTTGTGGGAATGCAGCTCTAAGTGGGTGGTAAATTCCATCTAAAGCTAAATATTGGCG 2640
          |||
Sbjct 2605 GTTGTGGGAATGCAGCTCTAAGTGGGTGGTAAATTCCATCTAAAGCTAAATATTGGCG 2664

Query 2641 AGAGACCGATAGCGAACAAGTACAGTGATGGAAAGATGAAAAGAACTTTGAAAAGAGAGT 2700
          |||
Sbjct 2665 AGAGACCGATAGCGAACAAGTACAGTGATGGAAAGATGAAAAGAACTTTGAAAAGAGAGT 2724

Query 2701 GAAAAGTACGTGAAATTGTTGAAAGGGAAGGGCTTGAGATCAGACTTGGTATTTTGCGA 2760
          |||
Sbjct 2725 GAAAAGTACGTGAAATTGTTGAAAGGGAAGGGCTTGAGATCAGACTTGGTATTTTGCGA 2784

Query 2761 TCCTTCTCTTCTTGGTTGGGTTCTCGCAGCTTACTGGGCCAGCATCGGTTTGGATGGTA 2820
          |||
Sbjct 2785 TCCTTCTCTTCTTGGTTGGGTTCTCGCAGCTTACTGGGCCAGCATCGGTTTGGATGGTA 2844

Query 2821 GGATAATGACTAAGGAATGTGGCTCTACTTCGGTGGAGTGTTATAGCCTTGGTTGATACT 2880
          |||
Sbjct 2845 GGATAATGACTAAGGAATGTGGCTCTACTTCGGTGGAGTGTTATAGCCTTGGTTGATACT 2904

Query 2881 GCCTGTCTAGACCGAGGACTGCGTCTTTTGACTAGGATGTTGGCATAATGATCTTAANCC 2940
          |||
Sbjct 2905 GCCTGTCTAGACCGAGGACTGCGTCTTTTGACTAGGATGTTGGCATAATGATCTTAANCC 2964

Query 2941 ACCCGTCTGAAACACGGACCA 2961
          |||
Sbjct 2965 ACCCGTCTGAAACACGGACCA 2985

```

>gb|GQ458019.1| *Debaryomyces hansenii* strain MA09-J 18S ribosomal RNA gene, partial sequence; internal transcribed spacer 1, 5.8S ribosomal RNA gene, and internal transcribed spacer 2, complete sequence; and 28S ribosomal RNA gene, partial sequence  
Length=2969

Score = 5421 bits (2935), Expect = 0.0  
Identities = 2952/2961 (99%), Gaps = 5/2961 (0%)  
Strand=Plus/Plus

```

Query 3 GCCATGCATGTCTAAGTATAAGCAATTTATACAGTGAAACTGCGAATGGCTCATTAAATC 62
          |||
Sbjct 12 GCCATGCATGTCTAAGTATAAGCAATTTATACAGTGAAACTGCGAATGGCTCATTAAATC 71

Query 63 AGTTATCGTTTATTTGATAGTACCTTTACTACTTGGATAACCGTGGTAATTCTAGAGCTA 122
          |||
Sbjct 72 AGTTATCGTTTATTTGATAGTACCTTTACTACTTGGATAACCGTGGTAATTCTAGAGCTA 131

Query 123 ATACATGCTAAAAATCCCGACTGTTTGAAGGGATGTATTTATTAGATAAAAAATCAATG 182
          |||
Sbjct 132 ATACATGCTAAAAATCCCGACTGTTTGAAGGGATGTATTTATTAGATAAAAAATCAATG 191

Query 183 CTTTTCGGAGCTCTTTGATGATTCATAATAACTTTTTCGAATCGCATGGCCTTGTGCTGGC 242
          |||
Sbjct 192 CTTTTCGGAGCTCTTTGATGATTCATAATAACTTTTTCGAATCGCATGGCCTTGTGCTGGC 251

Query 243 GATGGTTCATTCAAATTTCTGCCCTATCAACTTTTCGATGGTAGGATAGTGGCCTACCATG 302
          |||
Sbjct 252 GATGGTTCATTCAAATTTCTGCCCTATCAACTTTTCGATGGTAGGATAGTGGCCTACCATG 311

```

|       |      |                                                               |      |
|-------|------|---------------------------------------------------------------|------|
| Query | 303  | GTTTCAACGGGTAACGGGGAATAAGGGTTCGATTCCGGAGAGGGAGCCTGAGAAACGGCT  | 362  |
|       |      |                                                               |      |
| Sbjct | 312  | GTTTCAACGGGTAACGGGGAATAAGGGTTCGATTCCGGAGAGGGAGCCTGAGAAACGGCT  | 371  |
| Query | 363  | ACCACATCCAAGGAAGGCAGCAGGCGCGCAAATTACCCAATCCCGACACGGGGAGGTAGT  | 422  |
|       |      |                                                               |      |
| Sbjct | 372  | ACCACATCCAAGGAAGGCAGCAGGCGCGCAAATTACCCAATCCCGACACGGGGAGGTAGT  | 431  |
| Query | 423  | GACAATAAATAACGATACAGGGCCCTTTCGGGTCTTGTAATTGGAATGAGTACAATGTAA  | 482  |
|       |      |                                                               |      |
| Sbjct | 432  | GACAATAAATAACGATACAGGGCCCTTTCGGGTCTTGTAATTGGAATGAGTACAATGTAA  | 491  |
| Query | 483  | ATACCTTAACGAGGAACAATTGGAGGGCAAGTCTGGTGCCAGCAGCCGCGGTAATTCCAG  | 542  |
|       |      |                                                               |      |
| Sbjct | 492  | ATACCTTAANNAGGAACAATTGGAGGGCAAGTCTGGTGCCAGCAGCCGCGGTAATTCCAG  | 551  |
| Query | 543  | CTCCAATAGCGTATATTAAAGTTGTTGCAGTTAAAAAGCTCGTAGTTGAACCTTGGGCTT  | 602  |
|       |      |                                                               |      |
| Sbjct | 552  | CTCCAATAGCGTATATTAAAGTTGTTGCAGTTAAAAAGCTCGTAGTTGAACCTTGGGCTT  | 611  |
| Query | 603  | GGTTGGCCGGTCCGCCTTTTTGGCGAGTACTGGACCCAACCGAGCCTTTCCTTCTGGCTA  | 662  |
|       |      |                                                               |      |
| Sbjct | 612  | GGTTGGCCGGTCCGCCTTTTTGGCGAGTACTGGACCCAACCGAGCCTTTCCTTCTGGCTA  | 671  |
| Query | 663  | ACCTTTTCGCCCTTGTGGTGTGGGCGAACCAGGACTTTTACTTTGAAAAATTAGAGTGT   | 722  |
|       |      |                                                               |      |
| Sbjct | 672  | ACCTTTTCGCCCTTGTGGTGTGGGCGAACCAGGACTTTTACTTTGAAAAATTAGAGTGT   | 731  |
| Query | 723  | TCAAAGCAGGCCTTGTCTCGAATATATTAGCATGGAATAATAGAATAGGACGTTATGGTT  | 782  |
|       |      |                                                               |      |
| Sbjct | 732  | TCAAAGCAGGCCTTGTCTCGAATATATTAGCATGGAATAATAGAATAGGACGTTATGGTT  | 791  |
| Query | 783  | CTATTTTGTGGTTTCTAGGACCATCGTAATGATTAATAGGGACGGTCGGGGGCATCAGT   | 842  |
|       |      |                                                               |      |
| Sbjct | 792  | CTATTTTGTGGTTTCTAGGACCATCGTAATGATTAATAGGGACGGTCGGGGGCATCAGT   | 851  |
| Query | 843  | ATTCAGTTGTCAGAGGTGAAATTCTTGGATTACCTGAAGACTAACTACTGCGAAAGCATT  | 902  |
|       |      |                                                               |      |
| Sbjct | 852  | ATTCAGTTGTCAGAGGTGAAATTCTTGGATTACCTGAAGACTAACTACTGCGAAAGCATT  | 911  |
| Query | 903  | TGCCAAGGACGTTTTTCATTAATCAAGAACGAAAGTTAGGGGATCGAAGATGATCAGATAC | 962  |
|       |      |                                                               |      |
| Sbjct | 912  | TGCCAAGGACGTTTTTCATTAATCAAGAACGAAAGTTAGGGGATCGAAGATGATCAGATAC | 971  |
| Query | 963  | CGTCGTAGTCTTAACCATAAACTATGCCGACTAGGGATCGGGTGTGTTCTtttttttGAC  | 1022 |
|       |      |                                                               |      |
| Sbjct | 972  | CGTCGTAGTCTTAACCATAAACTATGCCGACTAGGGATCGGGTGTGTTCTTTTTTTGAC   | 1031 |
| Query | 1023 | GCACTCGGCACCTTACGAGAAATCAAAGTCTTGGGTTCTGGGGGAGTATGGTCGCAAG    | 1082 |
|       |      |                                                               |      |
| Sbjct | 1032 | GCACTCGGCACCTTACGAGAAATCAAAGTCTTGGGTTCTGGGGGAGTATGGTCGCAAG    | 1091 |
| Query | 1083 | GCTGAAACTTAAAGGAATTGACGGAAGGGCACCACCAGGAGTGGAGCCTGCGGCTTAATT  | 1142 |
|       |      |                                                               |      |
| Sbjct | 1092 | GCTGAAACTTAAAGGAATTGACGGAAGGGCACCACCAGGAGTGGAG-CTGCGGCTTAATT  | 1150 |
| Query | 1143 | TGACTCAACACGGGGAAACTCACCAGGTCCAGACACAATAAGGATTGACAGATTGAGAGC  | 1202 |
|       |      |                                                               |      |
| Sbjct | 1151 | TGACTCAACACGGGGAAACTCACCAGGTCCAGACACAATAAGGATTGACAGATTGAGAGC  | 1210 |
| Query | 1203 | TCTTTCTTGATTTTGTGGGTGGTGGTGCATGGCCGTTCTTAGTTGGTGGAGTGATTTGTC  | 1262 |
|       |      |                                                               |      |
| Sbjct | 1211 | TCTTTCTTGATTTTGTGGGTGGTGGTGCATGGCCGTTCTTAGTTGGTGGAGTGATTTGTC  | 1270 |

|       |      |                                                               |      |
|-------|------|---------------------------------------------------------------|------|
| Query | 1263 | TGCTTAATTGCGATAACGAACGAGACCTTAACCTACTAAATAGTGCTGCTAGCTTTTGGCT | 1322 |
|       |      |                                                               |      |
| Sbjct | 1271 | TGCTTAATTGCGATAACGAACGAGACCTTAACCTACTAAATAGTGCTGCTAGCTTTTGGCT | 1330 |
| Query | 1323 | GGTATAGTCACTTCTTAGAGGGACTATCGATTTCAAGTCGATGGAAGTTTGAGGCAATAA  | 1382 |
|       |      |                                                               |      |
| Sbjct | 1331 | GGTATAGTCACTTCTTAGAGGGACTATCGATTTCAAGTCGATGGAAGTTTGAGGCAATAA  | 1390 |
| Query | 1383 | CAGGTCTGTGATGCCCTTAGACGTTCTGGGCCGCACGCGCTACACTGACGGAGCCAAC    | 1442 |
|       |      |                                                               |      |
| Sbjct | 1391 | CAGGTCTGTGATGCCCTTAGACGTTCTGGGCCGCACGCGCTACACTGACGGAGCCAAC    | 1450 |
| Query | 1443 | GAGTATTAACCTTGGCCGAGAGGTCTGGGAAATCTTGTGAAACTCCGTCGTGCTGGGGAT  | 1502 |
|       |      |                                                               |      |
| Sbjct | 1451 | GAGTATTAACCTTGGCCGAGAGGTCTGGGAAATCTTGTGAAACTCCGTCGTGCTGGGGAT  | 1510 |
| Query | 1503 | AGAGCATTGTAATTATTGCTCTTCAACGAGGAATTCCTAGTAAGCGCAAGTCATCAGCTT  | 1562 |
|       |      |                                                               |      |
| Sbjct | 1511 | AGAGCATTGTAATTATTGCTCTTCAACGAGGAATTCCTAGTAAGCGCAAGTCATCAGCTT  | 1570 |
| Query | 1563 | GCGTTGATTACGTCCCTGCCCTTTGTACACACCGCCCGTCGCTACTACCGATTGAATGGC  | 1622 |
|       |      |                                                               |      |
| Sbjct | 1571 | GCGTTGATTACGTCCCTGCCCTTTGTACACACCGCCCGTCGCTACTACCGATTGAATGGC  | 1630 |
| Query | 1623 | TTAGTGAGGCCTCCGGATTGGTTTAAAGAAGGGGGCAACTCCATCTTGAACCGAAAAGC   | 1682 |
|       |      |                                                               |      |
| Sbjct | 1631 | TTAGTGAGGCCTCCGGATTGGTTTAAAGAAGGGGGCAACTCCATCTTGAACCGAAAAGC   | 1690 |
| Query | 1683 | TGGTCAAACCTTGGTCATTTAGAGGAAGTAAAAGTCGTAACAAGGTTTCCGTAGGTGAACC | 1742 |
|       |      |                                                               |      |
| Sbjct | 1691 | TGGTCAAACCTTGGTCATTTAGAGGAAGTAAAAGTCGTAACAAGGTTTCCGTAGGTGAACC | 1750 |
| Query | 1743 | TGCGGAAGGATCATTACAGTATTCTTTTTGCCAGCGCTTAATTGCGCGGCGAAAAACCT   | 1802 |
|       |      |                                                               |      |
| Sbjct | 1751 | TGCGGAAGGATCATTACAGTATTCTTTTTGCCAGCGCTTAATTGCGCGGCGAAAAACCT   | 1810 |
| Query | 1803 | TACACACAGTGTTTTTTGTTATTACAAGAACTTTTGCTTTGGTCTGGACTAGAAATAGTT  | 1862 |
|       |      |                                                               |      |
| Sbjct | 1811 | TACACACAGTGTTTTTTGTTATTACAAGAACTTTTGCTTTGGTCTGGACTAGAAATAGTT  | 1870 |
| Query | 1863 | TGGGCCAGAGGTTTACTGAACTAAACTTCAATATTTATATTGAATTGTTATTTATTTAAT  | 1922 |
|       |      |                                                               |      |
| Sbjct | 1871 | TGGGCCAGAGGTTTACTGAACTAAACTTCAATATTTATATTGAATTGTTATTTATTTAAT  | 1930 |
| Query | 1923 | TGTCAATTTGTTGATTAAATTCAAAAAATCTTCAAACCTTCAACAACGGATCTCTTGGT   | 1982 |
|       |      |                                                               |      |
| Sbjct | 1931 | TGTCAATTTGTTGATTAAATTCAAAAAATCTTCAAACCTTCAACAACGGATCTCTTGGT   | 1990 |
| Query | 1983 | TCTCGCATCGATGAAGAACGCAGCGAAATGCGATAAGTAATATGAATTGCAGATTTTCGT  | 2042 |
|       |      |                                                               |      |
| Sbjct | 1991 | TCTCGCATCGATGAAGAACGCAGCGAAATGCGATAAGTAATATGAATTGCAGATTTTCGT  | 2050 |
| Query | 2043 | GAATCATCGAATCTTTGAACGCACATTGCGCCCTCTGGTATTCCAGAGGGCATGCCTGTT  | 2102 |
|       |      |                                                               |      |
| Sbjct | 2051 | GAATCATCGAATCTTTGAACGCACATTGCGCCCTCTGGTATTCCAGAGGGCATGCCTGTT  | 2110 |
| Query | 2103 | TGAGCGTCATTTCTCTCTCAAACCTTCGGGTTTGGTATTGAGTGATACTCTTAGTTGAAC  | 2162 |
|       |      |                                                               |      |
| Sbjct | 2111 | TGAGCGTCATTTCTCTCTCAAACCTTCGGGTTTGGTATTGAGTGATACTCTTAGTTGAAC  | 2170 |
| Query | 2163 | TAGGCGTTTGCTTGAAATGTATTGGCATGAGTGGTACTGGATAGTGCTATATGACTTTCA  | 2222 |
|       |      |                                                               |      |
| Sbjct | 2171 | TAGGCGTTTGCTTGAAATGTATTGGCATGAGTGGTACTGGATAGTGCTATATGACTTTCA  | 2230 |















|       |      |                                                                   |      |
|-------|------|-------------------------------------------------------------------|------|
| Sbjct | 890  | <br>TTTTTCATTAATCAAGAACGAAAGTTAGGGGATCGAAGATGATCAGATACCGTCGTAGTCT | 949  |
| Query | 974  | TAACCATAAACTATGCCGACTAGGGATCGGGTGTGTTCcttttttGACGCACTCGGCAC       | 1033 |
| Sbjct | 950  | <br>TAACCATAAACTATGCCGACTAGGGATCGGGTGTGTCTTTTTTTGGCGCACTCGGCAC    | 1009 |
| Query | 1034 | CTTACGAGAAATCAAAGTCTTTGGGTCTGGGGGGAGTATGGTCGCAAGGCTGAAACTTA       | 1093 |
| Sbjct | 1010 | <br>CTTACGAGAAATCAAAGTTTTTTGGGTCTGGGGGGAGTATGGTCGCAAGGCTGAAACTTA  | 1069 |
| Query | 1094 | AAGGAATTGACGGAAGGGCACCACCAGGAGTGGAGCCTGCGGCTTAATTTGACTCAACAC      | 1153 |
| Sbjct | 1070 | <br>AAGGAATTGACGGAAGGGCACCACCAGGAGTGGAGCCTGCGGCTTAATTTGACTCAACAC  | 1129 |
| Query | 1154 | GGGGAAACTCACCAGGTCCAGACACAATAAGGATTGACAGATTGAGAGCTCTTTCTTGAT      | 1213 |
| Sbjct | 1130 | <br>GGGGAAACTCACCAGGTCCAGACACAATAAGGATTGACAGATTGAGAGCTCTTTCTTGAT  | 1189 |
| Query | 1214 | TTTGTGGGTGGTGGTGCATGGCCGTTCTTAGTTGGTGGAGTGATTGTCTGCTTAATTGC       | 1273 |
| Sbjct | 1190 | <br>TTTGTGGGTGGTGGTGCATGGCCGTTCTTAGTTGGTGGAGTGATTGTCTGCTTAATTGC   | 1249 |
| Query | 1274 | GATAACGAACGAGACCTAACCTACTAAATAGTGCTGCTAGCTTTTGCTGGTATAGTCAC       | 1333 |
| Sbjct | 1250 | <br>GATAACGAACGAGACCTAACCTACTAAATAGTGCTGCTAGCTTTTGCTGGTATAGTCAC   | 1309 |
| Query | 1334 | TTCTTAGAGGGACTATCGATTTCAAGTCGATGGAAGTTTGAGGCAATAACAGGTCTGTGA      | 1393 |
| Sbjct | 1310 | <br>TTCTTAGAGGGACTATCGATTTCAAGTCGATGGAAGTTTGAGGCAATAACAGGTCTGTGA  | 1369 |
| Query | 1394 | TGCCCTTAGACGTTCTGGGCCGCACGCGCTACACTGACGGAGCCAACGAGTAT-TAAC        | 1452 |
| Sbjct | 1370 | <br>TGCCCTTAGACGTTCTGGGCCGCACGCGCTACACTGACGGAGCCAGCGAGTATCTA-C    | 1428 |
| Query | 1453 | CTTGCCGAGAGGTCTGGGAAATCTTGTGAAACTCCGTCGTGCTGGGGATAGAGCATTGT       | 1512 |
| Sbjct | 1429 | <br>CTTGCCGAGAGGCTTGGGAAATCTTGTGAAACTCCGTCGTGCTGGGGATAGAGCATTGT   | 1488 |
| Query | 1513 | AATTATTGCTCTTCAACGAGGAATTCCTAGTAAGCGCAAGTCATCAGCTTGCCTTGATTA      | 1572 |
| Sbjct | 1489 | <br>AATTATTGCTCTTCAACGAGGAATTCCTAGTAAGCGCAAGTCATCAGCTTGCCTTGATTA  | 1548 |
| Query | 1573 | CGTCCCTGCCCTTTGTACACACCGCCCGTCGCTACTACCGATTGAATGGCTTAGTGAGGC      | 1632 |
| Sbjct | 1549 | <br>CGTCCCTGCCCTTTGTACACACCGCCCGTCGCTACTACCGATTGAATGGCTTAGTGAGGC  | 1608 |
| Query | 1633 | CTCCGGATTGGTTTAAAGAAGGGGGCAACTCCATCTTGGAACCGAAAAGCTGGTCAAAC       | 1692 |
| Sbjct | 1609 | <br>CTTCGGATTGGTTTAAAGAAGGGGGTAACTCCATCTTGTAACCGAAAAGTTGGACAAAC   | 1668 |
| Query | 1693 | TGGTCATTTAGAGGAAGTAAAAGTCGTAACAAGGTTTCCGTAGGTGAACCTGCGGAAGGA      | 1752 |
| Sbjct | 1669 | <br>TGGTCATTTAGAGGAAGTAAAAGTCGTAACAAGGTTTCCGTAGGTGAACCTGCGGAAGGA  | 1728 |
| Query | 1753 | TCATTACAGTATTCTTTT-----TGCCAGCGCTTAATTGCGCGCGGAAA-----A           | 1797 |
| Sbjct | 1729 | <br>TCATTACAGT-TAGTTTTCGGCACCGCTGCCTGCGCTTAACTGCGCGCGGGGCGCCGGA   | 1787 |
| Query | 1798 | -AACCTTACACACAGTGTTTTTTGTTATTACAAGAACTTTTGCTTTGGTCT-GGACTAGA      | 1855 |
| Sbjct | 1788 | <br>CAACCTTACACACTGTGTTTTT-GTTTTT-CT-GAACACTTGCTTTGG-CCTGG-CCTGA  | 1842 |
| Query | 1856 | AATAGTTTGGGCCAGAGGTTTACTGAACTAAAC-TTCAATATTTATATTGAATTGTTATT      | 1914 |



```

Sbjct 2766 ||||| ||||| ||| ||||| || | |||| || || || ||||| | ||| 2822
          CAGCATCAGTTTGGGTGGCAGGATAATTG-CGCGGGAAAGTAGCACTGCTTCGG-G-AGT
Query 2860 GT-T-ATAGCCTTG-GTTGATACTGCCTGTCTAGACCGAGGACTGCGTCTTTTACTAGG 2916
          || | ||||| || || ||||| ||||| ||||| ||||| ||||| ||||| |||||
Sbjct 2823 GTATTATAGCCT-GCGTCGATACTGCCTGCCTAGACTGAGGACTGCGTCTTT-GACTAGG 2880
          ||||| ||||| ||||| ||||| ||||| ||||| ||||| ||||| ||||| |||||
Query 2917 ATGTTGGCATAATGATCTTAANCCACCCGTCT-GAAACACGGACCA 2961
          ||| ||||| ||||| ||||| ||||| ||||| ||||| ||||| |||||
Sbjct 2881 ATGCTGGCATAATGATCTTAAGCCGCCCGTCTTGAAACACGGACCA 2926
          ||||| ||||| ||||| ||||| ||||| ||||| ||||| ||||| |||||

```

>gb|AY845351.1| *Candida lignicola* 18S ribosomal RNA gene, partial sequence  
Length=2337

Score = 3419 bits (1851), Expect = 0.0  
Identities = 2188/2342 (93%), Gaps = 58/2342 (2%)  
Strand=Plus/Plus

```

Query 3 GCCATGCATGTCTAAGTATAAGCAATTTATACAGTGAAACTGCGAATGGCTCATTAAATC 62
          ||||| ||||| ||||| ||||| ||||| ||||| ||||| ||||| ||||| ||||| |||||
Sbjct 35 GCCATGCATGTCTAAGTATAAGCAATTTATACAGTGAAACTGCGAATGGCTCATTAAATC 94
          ||||| ||||| ||||| ||||| ||||| ||||| ||||| ||||| ||||| ||||| |||||
Query 63 AGTTATCGTTTATTTGATAGTACCTTTACTACTTGGATAACCGTGGTAATTCTAGAGCTA 122
          ||||| ||||| ||||| ||||| ||||| ||||| ||||| ||||| ||||| ||||| |||||
Sbjct 95 AGTTATCGTTTATTTGATCGTACCTTTACTACTTGGATAACCGTGGTAATTCTAGAGCTA 154
          ||||| ||||| ||||| ||||| ||||| ||||| ||||| ||||| ||||| ||||| |||||
Query 123 ATACATGCTAAAAATCCCGACTGTTTGGGAAGGGATGTATTTATTAGATAAAAAATCAATG 182
          ||||| ||||| ||||| ||||| ||||| ||||| ||||| ||||| ||||| ||||| |||||
Sbjct 155 ATACATGCTTAAAAATCCCAAC--TTCGGAAGGGATGTATTTATTAGATAAAAAATCAATG 212
          ||||| ||||| ||||| ||||| ||||| ||||| ||||| ||||| ||||| ||||| |||||
Query 183 CT-TTTCGGAGCTCTTTGATGATTACATAATAACTTTTCGAATCGCATGGCCTTGTGCTGG 241
          || ||| ||||| ||||| ||||| ||||| ||||| ||||| ||||| ||||| ||||| |||||
Sbjct 213 CTCTTT--GAGCTCTTTGATGATTACATAATAACTTTTCGAATCGCATGGCCTTGTGCCGG 270
          ||||| ||||| ||||| ||||| ||||| ||||| ||||| ||||| ||||| ||||| |||||
Query 242 CGATGGTTCATTCAAATTTCTGCCCTATCAACTTTCGATGGTAGGATAGTGGCCTACCAT 301
          ||||| ||||| ||||| ||||| ||||| ||||| ||||| ||||| ||||| ||||| |||||
Sbjct 271 CGATGGTTCATTCAAATTTCTGCCCTATCAACTTTCGATGGTAGGATAGTGGCCTACCAT 330
          ||||| ||||| ||||| ||||| ||||| ||||| ||||| ||||| ||||| ||||| |||||
Query 302 GGTTCACCGGGTAACGGGGAATAAGGGTTCGATTCGGGAGAGGGAGCCTGAGAAACGGC 361
          ||||| ||||| ||||| ||||| ||||| ||||| ||||| ||||| ||||| ||||| |||||
Sbjct 331 GGTTCACCGGGTAACGGGGAATAAGGGTTCGATTCGGGAGAGGGAGCCTGAGAAACGGC 390
          ||||| ||||| ||||| ||||| ||||| ||||| ||||| ||||| ||||| ||||| |||||
Query 362 TACCACATCCAAGGAAGGCAGCAGGCGCGCAAATTACCCAATCCCGACACGGGGAGGTAG 421
          ||||| ||||| ||||| ||||| ||||| ||||| ||||| ||||| ||||| ||||| |||||
Sbjct 391 TACCACATCCAAGGAAGGCAGCAGGCGCGCAAATTACCCAATCCCGATACGGGGAGGTAG 450
          ||||| ||||| ||||| ||||| ||||| ||||| ||||| ||||| ||||| ||||| |||||
Query 422 TGACAATAAATAACGATACAGGGCCCTTT-CGGGTCTTGTAAATTGGAATGAGTACAATGT 480
          ||||| ||||| ||||| ||||| ||||| ||||| ||||| ||||| ||||| ||||| |||||
Sbjct 451 TGACAATAAATAACGATGTATGG-CCTTTATAGGTCATATAATTGGAATGAGTACAATGT 509
          ||||| ||||| ||||| ||||| ||||| ||||| ||||| ||||| ||||| ||||| |||||
Query 481 AAATACCTTAACGAGGAACAATTGGAGGGCAAGTCTGGTGCCAGCAGCCGCGGTAATTCC 540
          ||||| ||||| ||||| ||||| ||||| ||||| ||||| ||||| ||||| ||||| |||||
Sbjct 510 AAATACCTTAACGAGGAACAATTGGAGGGCAAGTCTGGTGCCAGCAGCCGCGGTAATTCC 569
          ||||| ||||| ||||| ||||| ||||| ||||| ||||| ||||| ||||| ||||| |||||
Query 541 AGCTCCAATAGCGTATATTAAGTTGTTGCAGTTAAAAGCTCGTAGTTGAACCTTGGGC 600
          ||||| ||||| ||||| ||||| ||||| ||||| ||||| ||||| ||||| ||||| |||||
Sbjct 570 AGCTCCAAAAGCGTATATTAAGTTGTTGCAGTTAAAAGCTCGTAGTTGAACCTTGGGC 629
          ||||| ||||| ||||| ||||| ||||| ||||| ||||| ||||| ||||| ||||| |||||
Query 601 TTGGTTGGCCGGTCCGCCTTTTTGGCGAGTACTGGACCCAACCGAGCCTTTCCTTCTGGC 660
          ||||| ||||| ||||| ||||| ||||| ||||| ||||| ||||| ||||| ||||| |||||
Sbjct 630 TTGGTTAGCCGGTCCACCTTTTTGGTGTGTACT-GACCTAACCGAGCCTTTCCTTCTGGC 688
          ||||| ||||| ||||| ||||| ||||| ||||| ||||| ||||| ||||| ||||| |||||
Query 661 TAACCTTTCGCCCT-TGTGGTGTGGCGAACCAGGACTTTTACTTTGAAAAATTAGAG 719
          ||||| ||||| ||||| ||||| ||||| ||||| ||||| ||||| ||||| ||||| |||||

```



|       |      |                                                                   |      |
|-------|------|-------------------------------------------------------------------|------|
| Sbjct | 1637 | <br>GAATGGCTTAGTGAGGCCTCCGGATTGGTTTAAAGTAGGAGGCAACTCCAACCTGGAACT  | 1696 |
| Query | 1676 | GAAAAGCTGGTCAAACCTGGTCATTTAGAGGAAGTAAAAGTCGTAACAAGGTTCCGTAG       | 1735 |
| Sbjct | 1697 | <br>GAAAAGCTGGTCAAACCTGGTCATTTAGAGGAAGTAAAAGTCGTAACAAGGTTCCGTAG   | 1756 |
| Query | 1736 | GTGAACCTGCGGAAGGATCATTACAGTATTCTTTTTGCCAGCGCTTAATTGCGCGGCGAA      | 1795 |
| Sbjct | 1757 | <br>GTGAACCTGCGGAAGGATCATTACTGTTTGTAGTTTACCAGCGCTTAATTGCGCGGTGAA  | 1816 |
| Query | 1796 | -AAAACCTTACACACAGTGTTTTTTGTATTACAAGAACTTTTGCTTTGGTCTGGACT-A       | 1853 |
| Sbjct | 1817 | <br>CAAATCTTACACACAGTGTTTTCT-TTATTAGAA-A-CTATTGCTTTGGTTTGG-CTTA   | 1872 |
| Query | 1854 | GAAATA-GTTTGGGCCAGAGGTTTACTGAACTAACTTCAATATTTATA-TTGAATTGTT       | 1911 |
| Sbjct | 1873 | <br>GAAATAAGTT-GGGCCAGAGGTTTA-T-AACT---T-CAATTTT-TAATTGAATTGTT    | 1923 |
| Query | 1912 | -ATTTATTTAATTGTCAATTTGTTGATTAAATTCAAAAAATCTTCAAACTTTCAACAAC       | 1970 |
| Sbjct | 1924 | <br>TATTTATT-AATTGTCAATTTGTTGATTAAATTTCAAAA-TCTTCAAACTTTCAACAAC   | 1981 |
| Query | 1971 | GGATCTCTTGGTTCTCGCATCGATGAAGAACGCAGCGAAATGCGATAAGTAATATGAATT      | 2030 |
| Sbjct | 1982 | <br>GGATCTCTTGGTTCTCGCATCGATGAAGAACGCAGCGAAATGCGATAAGTAATATGAATT  | 2041 |
| Query | 2031 | GCAGATTTTCGTGAATCATCGAATCTTTGAACGCACATTGCGCCCTCTGGTATTCCAGAG      | 2090 |
| Sbjct | 2042 | <br>GCAGATTTTCGTGAATCATCGAATCTTTGAACGCACATTGCGCCCTTGGTATTCCAAAG   | 2101 |
| Query | 2091 | GGCATGCCTGTTTGAGCGTCATTTCTCTCTCAAACCTTCGGGTTTGGTATTGAGTGATAC      | 2150 |
| Sbjct | 2102 | <br>GGCATGCCTGTTTGAGCGTCATTTCTCTCTCAAACCTTCGGGTTTGGTATTGAGTGATAC  | 2161 |
| Query | 2151 | TCTTAGTTGAACTAGGCGTTTGCTTGAAAATGTATTGGCATGAGTGGTACTGGATAGTGCT     | 2210 |
| Sbjct | 2162 | <br>TCTTAGTCGAACTAGGCGTTTGCTTGAAAAGTATTGGCACGAGTAGTACTAAATAGTGCT  | 2221 |
| Query | 2211 | AT-ATGA-C-TTT-CAATGTATTAGGTTTATCCAACCTCGTTGAATAGTTTAATGGTA-T-     | 2264 |
| Sbjct | 2222 | <br>TTCAGGAACATTTTCAATGTATTAGGTTTATCCAACCTCGTTGAG-A-TTTCTTGCTAGTG | 2279 |
| Query | 2265 | A-TTTCTCGGTATTCTAGGCTCGGCCTTACAATATAACAAACAAGTTTGACCTCAAATCA      | 2323 |
| Sbjct | 2280 | <br>AATTTTTT-GGTATA-T-GGCTTTGCCTTACAAAACAACAACAAGTT-GACCTCAAATCA  | 2335 |
| Query | 2324 | GG 2325                                                           |      |
| Sbjct | 2336 | <br>GG 2337                                                       |      |

>dbj|AB013590.1| Debaryomyces hansenii var. hansenii 18S rRNA gene, strain JCM 1990, partial sequence  
Length=1784

Score = 3230 bits (1749), Expect = 0.0  
Identities = 1754/1756 (99%), Gaps = 1/1756 (0%)  
Strand=Plus/Plus

|       |    |                                                                 |    |
|-------|----|-----------------------------------------------------------------|----|
| Query | 3  | GCCATGCATGTCTAAGTATAAGCAATTTATACAGTGAACTGCGAATGGCTCATTAAATC     | 62 |
| Sbjct | 30 | <br>GCCATGCATGTCTAAGTATAAGCAATTTATACAGTGAACTGCGAATGGCTCATTAAATC | 89 |









```

Query 1023  GCACTCGGCACCTTACGAGAAATCAAAGTCTTTGGGTTCTGGGGGAGTATGGTCGCAAG 1082
          |||
Sbjct 1049  GCACTCGGCACCTTACGAGAAATCAAAGTCTTTGGGTTCTGGGGGAGTATGGTCGCAAG 1108

Query 1083  GCTGAAACTTAAAGGAATTGACGGAAGGGCACCACCAGGAGTGGAGCCTGCGGCTTAATT 1142
          |||
Sbjct 1109  GCTGAAACTTAAAGGAATTGACGGAAGGGCACCACCAGGAGTGGAGCCTGCGGCTTAATT 1168

Query 1143  TGACTCAACACGGGGAAACTCACCAGGTCCAGACACAATAAGGATTGACAGATTGAGAGC 1202
          |||
Sbjct 1169  TGACTCAACACGGGGAAACTCACCAGGTCCAGACACAATAAGGATTGACAGATTGAGAGC 1228

Query 1203  TCTTTCTTGATTTTGTGGGTGGTGGTGCATGGCCGTTCTTAGTTGGTGGAGTGATTTGTC 1262
          |||
Sbjct 1229  TCTTTCTTGATTTTGTGGGTGGTGGTGCATGGCCGTTCTTAGTTGGTGGAGTGATTTGTC 1288

Query 1263  TGCTTAATTGCGATAACGAACGAGACCTTAACCTACTAAATAGTGCTGCTAGCTTTTGCT 1322
          |||
Sbjct 1289  TGCTTAATTGCGATAACGAACGAGACCTTAACCTACTAAATAGTGCTGCTAGCTTTTGCT 1348

Query 1323  GGTATAGTCACTTCTTAGAGGGACTATCGATTTCAAGTCGATGGAAGTTTGAGGCAATAA 1382
          |||
Sbjct 1349  GGTATAGTCACTTCTTAGAGGGACTATCGATTTCAAGTCGATGGAAGTTTGAGGCAATAA 1408

Query 1383  CAGGTCTGTGATGCCCTTAGACGTTCTGGGCCGCACGCGCTACACTGACGGAGCCAAC 1442
          |||
Sbjct 1409  CAGGTCTGTGATGCCCTTAGACGTTCTGGGCCGCACGCGCTACACTGACGGAGCCAAC 1468

Query 1443  GAGTATTAACCTTGGCCGAGAGGTCTGGGAAATCTTGTGAAACTCCGTCGTGCTGGGGAT 1502
          |||
Sbjct 1469  GAGTATTAACCTTGGCCGAGAGGTCTGGGAAATCTTGTGAAACTCCGTCGTGCTGGGGAT 1528

Query 1503  AGAGCATTGTAATTATTGCTCTTCAACGAGGAATTCCTAGTAAGCGCAAGTCATCAGCTT 1562
          |||
Sbjct 1529  AGAGCATTGTAATTATTGCTCTTCAACGAGGAATTCCTAGTAAGCGCAAGTCATCAGCTT 1588

Query 1563  GCGTTGATTACGTCCCTGCCCTTTGTACACACCGCCCGTCGCTACTACCGATTGAATGGC 1622
          |||
Sbjct 1589  GCGTTGATTACGTCCCTGCCCTTTGTACACACCGCCCGTCGCTACTACCGATTGAATGGC 1648

Query 1623  TTAGTGAGGCCTCCGGATTGGTTTAAAGAAGGGGGCAACTCCATCTTGAACCGAAAAGC 1682
          |||
Sbjct 1649  TTAGTGAGGCCTCCGGATTGGTTTAAAGAAGGGGGCAACTCCATCTTGAACCGAAAAGC 1708

Query 1683  TGGTCAAACCTTGGTCATTTAGAGGAAGTAAAAGTCGTAACAAGGTTTCCGTAGGTGAACC 1742
          |||
Sbjct 1709  TGGTCAAACCTTGGTCATTTAGAGGAAGTAAAAGTCGTAACAAGGTTTCCGTAGGTGAACC 1768

Query 1743  TGCGGAAGGATCATT 1758
          |||
Sbjct 1769  TGCGGAAGGATCATT 1784

```

>dbj|AB013567.1| *Debaryomyces hansenii* var. *fabryi* 18S rRNA gene, strain JCM 2166, partial sequence  
Length=1784

Score = 3225 bits (1746), Expect = 0.0  
Identities = 1754/1757 (99%), Gaps = 3/1757 (0%)  
Strand=Plus/Plus

```

Query 3      GCCATGCATGTCTAAGTATAAGCAATTTATACAGTGAAACTGCGAATGGCTCATTAAATC 62
          |||

```

|       |     |                                                                |      |
|-------|-----|----------------------------------------------------------------|------|
| Sbjct | 30  | GCCATGCATGTCTAAGTATAAGCAATTTATACAGTGAAACTGCGAATGGCTCATTAAATC   | 89   |
| Query | 63  | AGTTATCGTTTATTTGATAGTACCTTTACTACTTGGATAACCGTGGTAATTCTAGAGCTA   | 122  |
| Sbjct | 90  | AGTTATCGTTTATTTGATAGTACCTTTACTACTTGGATAACCGTGGTAATTCTAGAGCTA   | 149  |
| Query | 123 | ATACATGCTAAAAATCCCGACTGTTTGGGAAGGGATGTATTTATTAGATAAAAAATCAATG  | 182  |
| Sbjct | 150 | ATACATGCTAAAAATCCCGACTGTTTGGGAAGGGATGTATTTATTAGATAAAAAATCAATG  | 209  |
| Query | 183 | CTTTTCGGAGCTCTTTGATGATTCAATAAATCTTTTCGAATCGCATGGCCTTGTGCTGGC   | 242  |
| Sbjct | 210 | CTTTTCGGAGCTCTTTGATGATTCAATAAATCTTTTCGAATCGCATGGCCTTGTGCTGGC   | 269  |
| Query | 243 | GATGGTTCATTCAAATTTCTGCCCTATCAACTTTTCGATGGTAGGATAGTGGCCTACCATG  | 302  |
| Sbjct | 270 | GATGGTTCATTCAAATTTCTGCCCTATCAACTTTTCGATGGTAGGATAGTGGCCTACCATG  | 329  |
| Query | 303 | GTTTCAACGGGTAACGGGGAATAAGGGTTCGATTCCGGAGAGGGAGCCTGAGAAACGGCT   | 362  |
| Sbjct | 330 | GTTTCAACGGGTAACGGGGAATAAGGGTTCGATTCCGGAGAGGGAGCCTGAGAAACGGCT   | 389  |
| Query | 363 | ACCACATCCAAGGAAGGCAGCAGGCGCGCAAATTACCCAATCCCGACACGGGGAGGTAGT   | 422  |
| Sbjct | 390 | ACCACATCCAAGGAAGGCAGCAGGCGCGCAAATTACCCAATCCCGACACGGGGAGGTAGT   | 449  |
| Query | 423 | GACAATAAATAACGATACAGGGCCCTTTTCGGGTCTTGTAAATTGGAATGAGTACAATGTAA | 482  |
| Sbjct | 450 | GACAATAAATAACGATACAGGG-CCTTTTCGGGTCTTGTAAATTGGAATGAGTACAATGTAA | 508  |
| Query | 483 | ATACCTTAACGAGGAACAATTGGAGGGCAAGTCTGGTGCCAGCAGCCGCGGTAATTCCAG   | 542  |
| Sbjct | 509 | ATACCTTAACGAGGAACAATTGGAGGGCAAGTCTGGTGCCAGCAGCCGCGGTAATTCCAG   | 568  |
| Query | 543 | CTCCAATAGCGTATATTAAGTTGTTGCAGTTAAAAAGCTCGTAGTTGAACCTTGGGCTT    | 602  |
| Sbjct | 569 | CTCCAATAGCGTATATTAAGTTGTTGCAGTTAAAAAGCTCGTAGTTGAACCTTGGGCTT    | 628  |
| Query | 603 | GGTTGGCCGGTCCGCCTTTTTGGCGAGTACTGGACCCAACCGAGCCTTTCCTTCTGGCTA   | 662  |
| Sbjct | 629 | GGTTGGCCGGTCCGCCTTTTTGGCGAGTACTGGACCCAACCGAGCCTTTCCTTCTGGCTA   | 688  |
| Query | 663 | ACCTTTCGCCCTTGTGGTGTGGCGAACCAGGACTTTTACTTTGAAAAATTAGAGTGT      | 722  |
| Sbjct | 689 | ACCTTTCGCCCTTGTGGTGTGGCGAACCAGGACTTTTACTTTGAAAAATTAGAGTGT      | 748  |
| Query | 723 | TCAAAGCAGGCCTTTGCTCGAATATATTAGCATGGAATAATAGAATAGGACGTTATGGTT   | 782  |
| Sbjct | 749 | TCAAAGCAGGCCTTTGCTCGAATATATTAGCATGGAATAATAGAATAGGACGTTATGGTT   | 808  |
| Query | 783 | CTATTTTGTGGTTTCTAGGACCATCGTAATGATTAATAGGGACGGTCGGGGGCATCAGT    | 842  |
| Sbjct | 809 | CTATTTTGTGGTTTCTAGGACCATCGTAATGATTAATAGGGACGGTCGGGGGCATCAGT    | 868  |
| Query | 843 | ATTCAGTTGTCAGAGGTGAAATTCTTGGA-TTACCTGAAGACTAACTACTGCGAAAGCAT   | 901  |
| Sbjct | 869 | ATTCAGTTGTCAGAGGTGAAATTCTTGGA-TTACCTGAAGACTAACTACTGCGAAAGCAT   | 927  |
| Query | 902 | TTGCCAAGGACGTTTTCATTAATCAAGAACGAAAGTTAGGGGATCGAAGATGATCAGATA   | 961  |
| Sbjct | 928 | TTGCCAAGGACGTTTTCATTAATCAAGAACGAAAGTTAGGGGATCGAAGATGATCAGATA   | 987  |
| Query | 962 | CCGTCGTAGTCTTAACCATAAACTATGCCGACTAGGGATCGGGTGTGTTCTtttttttGA   | 1021 |

|       |      |                                                               |      |
|-------|------|---------------------------------------------------------------|------|
| Sbjct | 988  | CCGTCGTAGTCTTAACCATAAACTATGCCGACTAGGGATCGGGTGTGTTCTTTTTTTGA   | 1047 |
| Query | 1022 | CGCACTCGGCACCTTACGAGAAATCAAAGTCTTTGGGTTCTGGGGGAGTATGGTCGCAA   | 1081 |
| Sbjct | 1048 | CGCACTCGGCACCTTACGAGAAATCAAAGTCTTTGGGTTCTGGGGGAGTATGGTCGCAA   | 1107 |
| Query | 1082 | GGCTGAAACTTAAAGGAATTGACGGAAGGGCACCACCAGGAGTGGAGCCTGCGGCTTAAT  | 1141 |
| Sbjct | 1108 | GGCTGAAACTTAAAGGAATTGACGGAAGGGCACCACCAGGAGTGGAGCCTGCGGCTTAAT  | 1167 |
| Query | 1142 | TTGACTCAACACGGGGAAACTCACCAGGTCCAGACACAATAAGGATTGACAGATTGAGAG  | 1201 |
| Sbjct | 1168 | TTGACTCAACACGGGGAAACTCACCAGGTCCAGACACAATAAGGATTGACAGATTGAGAG  | 1227 |
| Query | 1202 | CTCTTTCTTGATTTTGTGGGTGGTGGTGCATGGCCGTTCTTAGTTGGTGGAGTGATTTGT  | 1261 |
| Sbjct | 1228 | CTCTTTCTTGATTTTGTGGGTGGTGGTGCATGGCCGTTCTTAGTTGGTGGAGTGATTTGT  | 1287 |
| Query | 1262 | CTGCTTAATTGCGATAACGAACGAGACCTTAACCTACTAAATAGTGCTGCTAGCTTTTGC  | 1321 |
| Sbjct | 1288 | CTGCTTAATTGCGATAACGAACGAGACCTTAACCTACTAAATAGTGCTGCTAGCTTTTGC  | 1347 |
| Query | 1322 | TGGTATAGTCACTTCTTAGAGGGACTATCGATTTCAAGTCGATGGAAGTTTGAGGCAATA  | 1381 |
| Sbjct | 1348 | TGGTATAGTCACTTCTTAGAGGGACTATCGATTTCAAGTCGATGGAAGTTTGAGGCAATA  | 1407 |
| Query | 1382 | ACAGGTCTGTGATGCCCTTAGACGTTCTGGGCCGCACGCGCTACACTGACGGAGCCAA    | 1441 |
| Sbjct | 1408 | ACAGGTCTGTGATGCCCTTAGACGTTCTGGGCCGCACGCGCTACACTGACGGAGCCAA    | 1467 |
| Query | 1442 | CGAGTATTAACCTTGGCCGAGAGGTCTGGGAAATCTTGTGAAACTCCGTCGTGCTGGGGA  | 1501 |
| Sbjct | 1468 | CGAGTATTAACCTTGGCCGAGAGGTCTGGGAAATCTTGTGAAACTCCGTCGTGCTGGGGA  | 1527 |
| Query | 1502 | TAGAGCATTGTAATTATTGCTCTTCAACGAGGAATTCCTAGTAAGCGCAAGTCATCAGCT  | 1561 |
| Sbjct | 1528 | TAGAGCATTGTAATTATTGCTCTTCAACGAGGAATTCCTAGTAAGCGCAAGTCATCAGCT  | 1587 |
| Query | 1562 | TGCGTTGATTACGTCCCTGCCCTTTGTACACACCGCCCGTCGCTACTACCGATTGAATGG  | 1621 |
| Sbjct | 1588 | TGCGTTGATTACGTCCCTGCCCTTTGTACACACCGCCCGTCGCTACTACCGATTGAATGG  | 1647 |
| Query | 1622 | CTTAGTGAGGCCTCCGGATTGGTTTAAAGAAGGGGGCAACTCCATCTTGAACCGAAAAG   | 1681 |
| Sbjct | 1648 | CTTAGTGAGGCCTCCGGATTGGTTTAAAGAAGGGGGCAACTCCATCTTGAACCGAAAAG   | 1707 |
| Query | 1682 | CTGGTCAAACCTGGTCAATTTAGAGGAAGTAAAAGTCGTAACAAGGTTTCCGTAGGTGAAC | 1741 |
| Sbjct | 1708 | CTGGTCAAACCTGGTCAATTTAGAGGAAGTAAAAGTCGTAACAAGGTTTCCGTAGGTGAAC | 1767 |
| Query | 1742 | CTGCGGAAGGATCATT                                              | 1758 |
| Sbjct | 1768 | CTGCGGAAGGATCATT                                              | 1784 |

>emb|X58053.1| D.hansenii gene for 18S ribosomal RNA  
Length=1800

Score = 3217 bits (1742), Expect = 0.0  
Identities = 1751/1755 (99%), Gaps = 2/1755 (0%)  
Strand=Plus/Plus

|       |   |                                                              |    |
|-------|---|--------------------------------------------------------------|----|
| Query | 3 | GCCATGCATGTCTAAGTATAAGCAATTTATACAGTGAAACTGCGAATGGCTCATTAAATC | 62 |
|       |   |                                                              |    |

|       |     |                                                               |      |
|-------|-----|---------------------------------------------------------------|------|
| Sbjct | 48  | GCCATGCATGTCTAAGTATAAGCAATTTATACAGTGAAACTGCGAATGGCTCATTAAATC  | 107  |
| Query | 63  | AGTTATCGTTTATTTGATAGTACCTTTACTACTTGGATAACCGTGGTAATTCTAGAGCTA  | 122  |
| Sbjct | 108 | AGTTATCGTTTATTTGATAGTACCTTTACTACTTGGATAACCGTGGTAATTCTAGAGCTA  | 167  |
| Query | 123 | ATACATGCTAAAAATCCCGACTGTTTGGGAAGGGATGTATTTATTAGATAAAAAATCAATG | 182  |
| Sbjct | 168 | ATACATGCTAAAAATCCCGACTGTTTGGGAAGGGATGTATTTATTAGATAAAAAATCAATG | 227  |
| Query | 183 | CTTTTCGGAGCTCTTTGATGATTCAATAAACTTTTCGAATCGCATGGCCTTGTGCTGGC   | 242  |
| Sbjct | 228 | CTTTTCGGAGCTCTTTGATGATTCAATAAACTTTTCGAATCGCATGGCCTTGTGCTGGC   | 287  |
| Query | 243 | GATGGTTCATTCAAATTTCTGCCCTATCAACTTTCGATGGTAGGATAGTGGCCTACCATG  | 302  |
| Sbjct | 288 | GATGGTTCATTCAAATTTCTGCCCTATCAACTTTCGATGGTAGGATAGTGGCCTACCATG  | 347  |
| Query | 303 | GTTTCAACGGGTAACGGGGAATAAGGGTTCGATTCCGGAGAGGGAGCCTGAGAAACGGCT  | 362  |
| Sbjct | 348 | GTTTCAACGGGTAACGGGGAATAAGGGTTCGATTCCGGAGAGGGAGCCTGAGAAACGGCT  | 407  |
| Query | 363 | ACCACATCCAAGGAAGGCAGCAGGCGCGCAAATTACCCAATCCCGACACGGGGAGGTAGT  | 422  |
| Sbjct | 408 | ACCACATCCAAGGAAGGCAGCAGGCGCGCAAATTACCCAATCCCGACACGGGGAGGTAGT  | 467  |
| Query | 423 | GACAATAAATAACGATACAGGGCCCTTTCGGGTCTTGTAAATTGGAATGAGTACAATGTAA | 482  |
| Sbjct | 468 | GACAATAAATAACGATACAGGGCCCTTTCGGGTCTTGTAAATTGGAATGAGTACAATGTAA | 527  |
| Query | 483 | ATACCTTAACGAGGAACAATTGGAGGGCAAGTCTGGTGCCAGCAGCCGCGGTAATTCCAG  | 542  |
| Sbjct | 528 | ATACCTTAACGAGGAACAATTGGAGGGCAAGTCTGGTGCCAGCAGCCGCGGTAATTCCAG  | 587  |
| Query | 543 | CTCCAATAGCGTATATTAAGTTGTTGCAGTTAAAAGCTCGTAGTTGAACCTTGGGCTT    | 602  |
| Sbjct | 588 | CTCCAATAGCGTATATTAAGTTGTTGCAGTTAAAAGCTCGTAGTTGAACCTTGGGCTT    | 647  |
| Query | 603 | GGTTGGCCGGTCCGCCTTTTTGGCGAGTACTGGACCCAACCGAGCCTTTCCTTCTGGCTA  | 662  |
| Sbjct | 648 | GGTTGGCCGGTCCGCCTTTTTGGCGAGTACTGGACCCAACCGAGCCTTTCCTTCTGGCTA  | 707  |
| Query | 663 | ACCTTTCGCCCTTGTGGTGTGGCGAACCAGGACTTTTACTTTGAAAAAATTAGAGTGT    | 722  |
| Sbjct | 708 | ACCTTTCGCCCTTGTGGTGTGGCGAACCAGGACTTTTACTTTGAAAAAATTAGAGTGT    | 767  |
| Query | 723 | TCAAAGCAGGCCTTTGCTCGAATATATTAGCATGGAATAATAGAATAGGACGTTATGGTT  | 782  |
| Sbjct | 768 | TCAAAGCAGGCCTTTGCTCGAATATATTAGCATGGAATAATAGAATAGGACGTTATGGTT  | 827  |
| Query | 783 | CTATTTTGTGGTTTCTAGGACCATCGTAATGATTAATAGGGACGGTCGGGGGCATCAGT   | 842  |
| Sbjct | 828 | CTATTTTGTGGTTTCTAGGACCATCGTAATGATTAATAGGGACGGTCGGGGGCATCAGT   | 887  |
| Query | 843 | ATTCAGTTGTCAGAGGTGAAATTCTTGGATTACCTGAAGACTAACTACTGCGAAAGCATT  | 902  |
| Sbjct | 888 | ATTCAGTTGTCAGAGGTGAAATTCTTGGATTACCTGAAGACTAACTACTGCGAAAGCATT  | 947  |
| Query | 903 | TGCCAAGGACGTTTTTCATTAATCAAGAACGAAAGTTAGGGGATCGAAGATGATCAGATAC | 962  |
| Sbjct | 948 | TGCCAAGGACGTTTTTCATTAATCAAGAACGAAAGTTAGGGGATCGAAGATGATCAGATAC | 1007 |
| Query | 963 | CGTCGTAGTCTTAACCATAAACTATGCCGACTAGGGATCGGGTGTGTTCTtttttttGAC  | 1022 |

|       |      |                                                                  |      |
|-------|------|------------------------------------------------------------------|------|
| Sbjct | 1008 | CGTCGTAGTCTTAACCATAAACTATGCCGACTAGGGATCGGGTGTGTTCTTTTTTTGAC      | 1067 |
| Query | 1023 | GCACTCGGCACCTTACGAGAAATCAAAGTCTTTGGGTTCTGGGGGAGTATGGTCGCAAG      | 1082 |
| Sbjct | 1068 | <br>GCACTCGGCACCTTACGAGAAATCAAAGTCTTTGGGTTCTGGGGGAGTATGGTCGCAAG  | 1127 |
| Query | 1083 | GCTGAAACTTAAAGGAATTGACGGAAGGGCACCACCAGGAGTGGAGCCTGCGGCTTAATT     | 1142 |
| Sbjct | 1128 | <br>GCCGAAACTTAAAGGAATTGACGGAAGGGCACCACCAGGAGTGGAGCCTGCG-CTTAATT | 1186 |
| Query | 1143 | TGACTCAACACGGGGAAACTCACCAGGTCCAGACACAATAAGGATTGACAGATTGAGAGC     | 1202 |
| Sbjct | 1187 | <br>TGACTCAACACGGGGAAACTCACCAGGTCCAGACACAATAAGGATTGACAGATTGAGAGC | 1246 |
| Query | 1203 | TCTTTCTTGATTTTGTGGGTGGTGGTGCATGGCCGTTCTTAGTTGGTGGAGTGATTTGTC     | 1262 |
| Sbjct | 1247 | <br>TCTTTCTTGATTTTGTGGGTGGTGGTGCATGGCCGTTCTTAGTTGGTGGAGTGATTTGTC | 1306 |
| Query | 1263 | TGCTTAATTGCGATAACGAACGAGACCTTAACCTACTAAATAGTGCTGCTAGCTTTTGCT     | 1322 |
| Sbjct | 1307 | <br>TGCTTAATTGCGATAACGAACGAGACCTTAACCTACTAAATAGTGCTGCTAGCTTTTGCT | 1366 |
| Query | 1323 | GGTATAGTCACTTCTTAGAGGGACTATCGATTTCAAGTCGATGGAAGTTTGAGGCAATAA     | 1382 |
| Sbjct | 1367 | <br>GGTATAGTCACTTCTTAGAGGGACTATCGATTTCAAGTCGATGGAAGTTTGAGGCAATAA | 1426 |
| Query | 1383 | CAGGTCTGTGATGCCCTTAGACGTTCTGGGCCGCACGCGCTACACTGACGGAGCCAAC       | 1442 |
| Sbjct | 1427 | <br>CAGGTCTGTGATGCCCTTAGACGTTCTGGGCCGCACGCGCTACACTGACGGAGCCAAC   | 1486 |
| Query | 1443 | GAGTATTAACCTTGGCCGAGAGGTCTGGGAAATCTTGTGAAACTCCGTCGTGCTGGGGAT     | 1502 |
| Sbjct | 1487 | <br>GAGTATTAACCTTGGCCGAGAGGTCTGGGAAATCTTGTGAAACTCCGTCGTGCTGGGGAT | 1546 |
| Query | 1503 | AGAGCATTGTAATTATTGCTCTTCAACGAGGAATTCCTAGTAAGCGCAAGTCATCAGCTT     | 1562 |
| Sbjct | 1547 | <br>AGAGCATTGTAATTATTGCTCTTCAACGAGGAATTCCTAGTAAGCGCAAGTCATCAGCTT | 1606 |
| Query | 1563 | GCGTTGATTACGTCCCTGCCCTTTGTACACACCGCCCGTCGCTACTACCGATTGAATGGC     | 1622 |
| Sbjct | 1607 | <br>GCGTTGATTACGTCCCTGCCCTTTGTACACACCGCCCGTCGCTACTACCGATTGAATGGC | 1666 |
| Query | 1623 | TTAGTGAGGCCTCCGGATTGGTTTAAAGAAGGGGGCAACTCCATCTTGAACCGAAAAGC      | 1682 |
| Sbjct | 1667 | <br>TTAGTGAGGCCTCCGGATTGGTTTAAAGAAGGGGGCAACTC-ATCTTGAACCGAAAAGC  | 1725 |
| Query | 1683 | TGGTCAAACCTGGTCATTTAGAGGAAGTAAAAGTCGTAACAAGGTTTCCGTAGGTGAACC     | 1742 |
| Sbjct | 1726 | <br>TGGTCAAACCTGGTCATTTAGAGGAAGTAAAAGTCGTAACAAGGTTTCCGTAGGTGAACC | 1785 |
| Query | 1743 | TGCGGAAGGATCATT 1757                                             |      |
| Sbjct | 1786 | <br>TGCGGAAGGATCATT 1800                                         |      |

>dbj|AB013587.1| Pichia guilliermondii 18S rRNA gene, strain JCM 1539, partial sequence

Length=1784

Score = 3203 bits (1734), Expect = 0.0  
Identities = 1751/1758 (99%), Gaps = 5/1758 (0%)  
Strand=Plus/Plus

Query 3 GCCATGCATGTCTAAGTATAAGCAATTTATACAGTGAAACTGCGAATGGCTCATTAAATC 62

|       |     |                                                                   |      |
|-------|-----|-------------------------------------------------------------------|------|
| Sbjct | 30  | <br>GCCATGCATGTCTAAGTATAAGCAATTTATACAGTGAAACTGCGAATGGCTCATTAAATC  | 89   |
| Query | 63  | AGTTATCGTTTATTTGATAGTACCTTTACTACTTGGATAAACCGTGGTAATTCTAGAGCTA     | 122  |
| Sbjct | 90  | <br>AGTTATCGTTTATTTGATAGTACCTTTACTACTTGGATAAACCGTGGTAATTCTAGAGCTA | 149  |
| Query | 123 | ATACATGCTAAAAATCCCGACTGTTTGAAGGGATGTATTTATTAGATAAAAAATCAATG       | 182  |
| Sbjct | 150 | <br>ATACATGCTAAAAATCCCGACTGTTTGAAGGGATGTATTTATTAGATAAAAAATCAATG   | 209  |
| Query | 183 | CT-TTTCGGAGCTCTTTGATGATTCATAATAACTTTTCGAATCGCATGGCCTTGTGCTGG      | 241  |
| Sbjct | 210 | <br>CTCTTT--GAGCTCTTTGATGATTCATAATAACTTTTCGAATCGCATGGCCTTGTGCTGG  | 267  |
| Query | 242 | CGATGGTTCATTCAAATTTCTGCCCTATCAACTTTCGATGGTAGGATAGTGGCCTACCAT      | 301  |
| Sbjct | 268 | <br>CGATGGTTCATTCAAATTTCTGCCCTATCAACTTTCGATGGTAGGATAGTGGCCTACCAT  | 327  |
| Query | 302 | GGTTTCAACGGGTAACGGGGAATAAGGGTTCGATTCCGGAGAGGGAGCCTGAGAAACGGC      | 361  |
| Sbjct | 328 | <br>GGTTTCAACGGGTAACGGGGAATAAGGGTTCGATTCCGGAGAGGGAGCCTGAGAAACGGC  | 387  |
| Query | 362 | TACCACATCCAAGGAAGGCAGCAGGCGCGCAAATTACCCAATCCCGACACGGGGAGGTAG      | 421  |
| Sbjct | 388 | <br>TACCACATCCAAGGAAGGCAGCAGGCGCGCAAATTACCCAATCCCGACACGGGGAGGTAG  | 447  |
| Query | 422 | TGACAATAAATAACGATACAGGGCCCTTTCGGGTCTTGTAATTGGAATGAGTACAATGTA      | 481  |
| Sbjct | 448 | <br>TGACAATAAATAACGATACAGGGCCCTTTCGGGTCTTGTAATTGGAATGAGTACAATGTA  | 507  |
| Query | 482 | AATACCTTAACGAGGAACAATTGGAGGGCAAGTCTGGTGCCAGCAGCCGCGGTAATTCCA      | 541  |
| Sbjct | 508 | <br>AATACCTTAACGAGGAACAATTGGAGGGCAAGTCTGGTGCCAGCAGCCGCGGTAATTCCA  | 567  |
| Query | 542 | GCTCCAATAGCGTATATTAAGTTGTTGCAGTTAAAAAGCTCGTAGTTGAACCTTGGGCT       | 601  |
| Sbjct | 568 | <br>GCTCCAATAGCGTATATTAAGTTGTTGCAGTTAAAAAGCTCGTAGTTGAACCTTGGGCT   | 627  |
| Query | 602 | TGTTTGGCCGGTCCGCCTTTTTGGCGAGTACTGGACCCAACCGAGCCTTTCCTTCTGGCT      | 661  |
| Sbjct | 628 | <br>TGTTTGGCCGGTCCGCCTTTTTGGCGAGTACTGGACCCAACCGAGCCTTTCCTTCTGGCT  | 687  |
| Query | 662 | AACCTTTCGCCCTTGTGGTGTGGCGAACCAGGACTTTTACTTTGAAAAAATTAGAGTG        | 721  |
| Sbjct | 688 | <br>AACCATTCGCCCTTGTGGTGTGGCGAACCAGGACTTTTACTTTGAAAAAATTAGAGTG    | 747  |
| Query | 722 | TTCAAAGCAGGCCTTTGCTCGAATATATTAGCATGGAATAATAGAATAGGACGTTATGGT      | 781  |
| Sbjct | 748 | <br>TTCAAAGCAGGCCTTTGCTCGAATATATTAGCATGGAATAATAGAATAGGACGTTATGGT  | 807  |
| Query | 782 | TCTATTTTGTGGTTTCTAGGACCATCGTAATGATTAATAGGGACGGTCGGGGGCATCAG       | 841  |
| Sbjct | 808 | <br>TCTATTTTGTGGTTTCTAGGACCATCGTAATGATTAATAGGGACGGTCGGGGGCATCAG   | 867  |
| Query | 842 | TATTCAGTTGTCAGAGGTGAAATTCTTGGA-TTACCTGAAGACTAACTACTGCGAAAGCA      | 900  |
| Sbjct | 868 | <br>TATTCAGTTGTCAGAGGTGAAATTCTTGGA-TTACCTGAAGACTAACTACTGCGAAAGCA  | 926  |
| Query | 901 | TTTGCCAAGGACGTTTTTCATTAATCAAGAACGAAAGTTAGGGGATCGAAGATGATCAGAT     | 960  |
| Sbjct | 927 | <br>TTTGCCAAGGACGTTTTTCATTAATCAAGAACGAAAGTTAGGGGATCGAAGATGATCAGAT | 986  |
| Query | 961 | ACCGTCGTAGTCTTAACCATAAACTATGCCGACTAGGGATCGGGTGTGTTCTtttttttG      | 1020 |

|       |      |                                                                  |      |
|-------|------|------------------------------------------------------------------|------|
| Sbjct | 987  | <br>ACCGTCGTAGTCTTAACCATAAACTATGCCGACTAGGGATCGGGTGTGTTCTTTTTTTTG | 1046 |
| Query | 1021 | ACGCACTCGGCACCTTACGAGAAATCAAAGTCTTTGGGTTCTGGGGGAGTATGGTCGCA      | 1080 |
| Sbjct | 1047 | <br>ACGCACTCGGCACCTTACGAGAAATCAAAGTCTTTGGGTTCTGGGGGAGTATGGTCGCA  | 1106 |
| Query | 1081 | AGGCTGAAACTTAAAGGAATTGACGGAAGGGCACCACCAGGAGTGGAGCCTGCGGCTTAA     | 1140 |
| Sbjct | 1107 | <br>AGGCTGAAACTTAAAGGAATTGACGGAAGGGCACCACCAGGAGTGGAGCCTGCGGCTTAA | 1166 |
| Query | 1141 | TTTACTCAACACGGGAAACTCACCAGGTCAGACACAATAAGGATTGACAGATTGAGA        | 1200 |
| Sbjct | 1167 | <br>TTTACTCAACACGGGAAACTCACCAGGTCAGACACAATAAGGATTGACAGATTGAGA    | 1226 |
| Query | 1201 | GCTCTTTCTTGATTTTGTGGGTGGTGGTGCATGGCCGTTCTTAGTTGGTGGAGTGATTTG     | 1260 |
| Sbjct | 1227 | <br>GCTCTTTCTTGATTTTGTGGGTGGTGGTGCATGGCCGTTCTTAGTTGGTGGAGTGATTTG | 1286 |
| Query | 1261 | TCTGCTTAATTGCGATAACGAACGAGACCTAACCTACTAAATAGTGCTGCTAGCTTTTG      | 1320 |
| Sbjct | 1287 | <br>TCTGCTTAATTGCGATAACGAACGAGACCTAACCTACTAAATAGTGCTGCTAGCTTTTG  | 1346 |
| Query | 1321 | CTGGTATAGTCACTTCTTAGAGGGACTATCGATTTCAAGTCGATGGAAGTTTGAGGCAAT     | 1380 |
| Sbjct | 1347 | <br>CTGGTATAGTCACTTCTTAGAGGGACTATCGATTTCAAGTCGATGGAAGTTTGAGGCAAT | 1406 |
| Query | 1381 | AACAGGTCTGTGATGCCCTTAGACGTTCTGGGCCGCACGCGCTACACTGACGGAGCCA       | 1440 |
| Sbjct | 1407 | <br>AACAGGTCTGTGATGCCCTTAGACGTTCTGGGCCGCACGCGCTACACTGACGGAGCCA   | 1466 |
| Query | 1441 | ACGAGTATTAACCTTGGCCGAGAGGTCTGGGAAATCTTGTGAAACTCCGTCGTGCTGGGG     | 1500 |
| Sbjct | 1467 | <br>GCGAGTATTAACCTTGGCCGAGAGGTCTGGGAAATCTTGTGAAACTCCGTCGTGCTGGGG | 1526 |
| Query | 1501 | ATAGAGCATTGTAATTATTGCTCTTCAACGAGGAATTCCTAGTAAGCGCAAGTCATCAGC     | 1560 |
| Sbjct | 1527 | <br>ATAGAGCATTGTAATTATTGCTCTTCAACGAGGAATTCCTAGTAAGCGCAAGTCATCAGC | 1586 |
| Query | 1561 | TTGCGTTGATTACGTCCCTGCCCTTTGTACACACCGCCCGTCGCTACTACCGATTGAATG     | 1620 |
| Sbjct | 1587 | <br>TTGCGTTGATTACGTCCCTGCCCTTTGTACACACCGCCCGTCGCTACTACCGATTGAATG | 1646 |
| Query | 1621 | GCTTAGTGAGGCCTCCGGATTGGTTTAAAGAAGGGGGCAACTCCATCTTGAACCGAAAA      | 1680 |
| Sbjct | 1647 | <br>GCTTAGTGAGGCCTCCGGATTGGTTTAAAGAAGGGGGCAACTCCATCTTGAACCGAAAA  | 1706 |
| Query | 1681 | GCTGGTCAAACCTGGTCATTTAGAGGAAGTAAAAGTCGTAACAAGGTTTCCGTAGGTGAA     | 1740 |
| Sbjct | 1707 | <br>GCTGGTCAAACCTGGTCATTTAGAGGAAGTAAAAGTCGTAACAAGGTTTCCGTAGGTGAA | 1766 |
| Query | 1741 | CCTGCGGAAGGATCATT 1758                                           |      |
| Sbjct | 1767 | <br>CCTGCGGAAGGATCATT 1784                                       |      |

>dbj|AB013566.1| *Candida fukuyamaensis* 18S rRNA gene, strain JCM 9396, partial sequence  
Length=1784

Score = 3203 bits (1734), Expect = 0.0  
Identities = 1751/1758 (99%), Gaps = 5/1758 (0%)  
Strand=Plus/Plus



|       |     |                                                               |     |
|-------|-----|---------------------------------------------------------------|-----|
| Query | 3   | GCCATGCATGTCTAAGTATAAGCAATTTATACAGTGAAACTGCGAATGGCTCATTAAATC  | 62  |
|       |     |                                                               |     |
| Sbjct | 30  | GCCATGCATGTCTAAGTATAAGCAATTTATACAGTGAAACTGCGAATGGCTCATTAAATC  | 89  |
| Query | 63  | AGTTATCGTTTATTTGATAGTACCTTTACTACTTGGATAAACCGTGGTAATTCTAGAGCTA | 122 |
|       |     |                                                               |     |
| Sbjct | 90  | AGTTATCGTTTATTTGATAGTACCTTTACTACTTGGATAAACCGTGGTAATTCTAGAGCTA | 149 |
| Query | 123 | ATACATGCTAAAAATCCCGACTGTTTGAAGGGATGTATTTATTAGATAAAAAATCAATG   | 182 |
|       |     |                                                               |     |
| Sbjct | 150 | ATACATGCTAAAAATCCCGACTGTTTGAAGGGATGTATTTATTAGATAAAAAATCAATG   | 209 |
| Query | 183 | CT-TTTCGGAGCTCTTTGATGATTCATAATAACTTTTTCGAATCGCATGGCCTTGTGCTGG | 241 |
|       |     |                                                               |     |
| Sbjct | 210 | CTCTTT--GAGCTCTTTGATGATTCATAATAACTTTTTCGAATCGCATGGCCTTGTGCTGG | 267 |
| Query | 242 | CGATGGTTCATTCAAATTTCTGCCCTATCAACTTTCGATGGTAGGATAGTGGCCTACCAT  | 301 |
|       |     |                                                               |     |
| Sbjct | 268 | CGATGGTTCATTCAAATTTCTGCCCTATCAACTTTCGATGGTAGGATAGTGGCCTACCAT  | 327 |
| Query | 302 | GGTTTCAACGGGTAACGGGGAATAAGGGTTCGATTCCGGAGAGGGAGCCTGAGAAACGGC  | 361 |
|       |     |                                                               |     |
| Sbjct | 328 | GGTTTCAACGGGTAACGGGGAATAAGGGTTCGATTCCGGAGAGGGAGCCTGAGAAACGGC  | 387 |
| Query | 362 | TACCACATCCAAGGAAGGCAGCAGGCGCGCAAATTACCCAATCCCGACACGGGGAGGTAG  | 421 |
|       |     |                                                               |     |
| Sbjct | 388 | TACCACATCCAAGGAAGGCAGCAGGCGCGCAAATTACCCAATCCCGACACGGGGAGGTAG  | 447 |
| Query | 422 | TGACAATAAATAACGATACAGGGCCCTTTCGGGTCTTGTAATTGGAATGAGTACAATGTA  | 481 |
|       |     |                                                               |     |
| Sbjct | 448 | TGACAATAAATAACGATACAGGGCCCTTTCGGGTCTTGTAATTGGAATGAGTACAATGTA  | 507 |
| Query | 482 | AATACCTTAACGAGGAACAATTGGAGGGCAAGTCTGGTGCCAGCAGCCGCGGTAATTCCA  | 541 |
|       |     |                                                               |     |
| Sbjct | 508 | AATACCTTAACGAGGAACAATTGGAGGGCAAGTCTGGTGCCAGCAGCCGCGGTAATTCCA  | 567 |
| Query | 542 | GCTCCAATAGCGTATATTTAAAGTTGTTGCAGTTAAAAAGCTCGTAGTTGAACCTTGGGCT | 601 |
|       |     |                                                               |     |
| Sbjct | 568 | GCTCCAATAGCGTATATTTAAAGTTGTTGCAGTTAAAAAGCTCGTAGTTGAACCTTGGGCT | 627 |
| Query | 602 | TGTTTGGCCGGTCCGCCTTTTTGGCGAGTACTGGACCCAACCGAGCCTTTCCTTCTGGCT  | 661 |
|       |     |                                                               |     |
| Sbjct | 628 | TGTTTGGCCGGTCCGCCTTTTTGGCGAGTACTGGACCCAACCGAGCCTTTCCTTCTGGCT  | 687 |
| Query | 662 | AACCTTTCGCCCTTGTGGTGTGGCGAACCAGGACTTTTACTTTGAAAAAATTAGAGTG    | 721 |
|       |     |                                                               |     |
| Sbjct | 688 | AACCATTCGCCCTTGTGGTGTGGCGAACCAGGACTTTTACTTTGAAAAAATTAGAGTG    | 747 |
| Query | 722 | TTCAAAGCAGGCCTTTGCTCGAATATATTAGCATGGAATAATAGAATAGGACGTTATGGT  | 781 |
|       |     |                                                               |     |
| Sbjct | 748 | TTCAAAGCAGGCCTTTGCTCGAATATATTAGCATGGAATAATAGAATAGGACGTTATGGT  | 807 |
| Query | 782 | TCTATTTTGTGGTTTCTAGGACCATCGTAATGATTAATAGGGACGGTCGGGGGCATCAG   | 841 |
|       |     |                                                               |     |
| Sbjct | 808 | TCTATTTTGTGGTTTCTAGGACCATCGTAATGATTAATAGGGACGGTCGGGGGCATCAG   | 867 |
| Query | 842 | TATTCAGTTGTCAGAGGTGAAATTCTTGGA-TTACCTGAAGACTAACTACTGCGAAAGCA  | 900 |
|       |     |                                                               |     |
| Sbjct | 868 | TATTCAGTTGTCAGAGGTGAAATTCTTGGA-TTACCTGAAGACTAACTACTGCGAAAGCA  | 926 |
| Query | 901 | TTTGCCAAGGACGTTTTTCATTAATCAAGAACGAAAGTTAGGGGATCGAAGATGATCAGAT | 960 |
|       |     |                                                               |     |
| Sbjct | 927 | TTTGCCAAGGACGTTTTTCATTAATCAAGAACGAAAGTTAGGGGATCGAAGATGATCAGAT | 986 |





```

Query 961 ACCGTCGTAGTCTTAACCATAAACTATGCCGACTAGGGATCGGGTGTGTTCTtttttttG 1020
      |||
Sbjct 987 ACCGTCGTAGTCTTAACCATAAACTATGCCGACTAGGGATCGGGTGTGTTCTTTTTTTG 1046

Query 1021 ACGCACTCGGCACCTTACGAGAAATCAAAGTCTTTGGGTTCTGGGGGAGTATGGTCGCA 1080
      |||
Sbjct 1047 ACGCACTCGGCACCTTACGAGAAATCAAAGTCTTTGGGTTCTGGGGGAGTATGGTCGCA 1106

Query 1081 AGGCTGAAACTTAAAGGAATTGACGGAAGGGCACCACCAGGAGTGGAGCCTGCGGCTTAA 1140
      |||
Sbjct 1107 AGGCTGAAACTTAAAGGAATTGACGGAAGGGCACCACCAGGAGTGGAGCCTGCGGCTTAA 1166

Query 1141 TTTGACTCAACACGGGGAAACTCACCAGGTCCAGACACAATAAGGATTGACAGATTGAGA 1200
      |||
Sbjct 1167 TTTGACTCAACACGGGGAAACTCACCAGGTCCAGACACAATAAGGATTGACAGATTGAGA 1226

Query 1201 GCTCTTTCTTGATTTTGTGGGTGGTGGTGCATGGCCGTTCTTAGTTGGTGGAGTGATTTG 1260
      |||
Sbjct 1227 GCTCTTTCTTGATTTTGTGGGTGGTGGTGCATGGCCGTTCTTAGTTGGTGGAGTGATTTG 1286

Query 1261 TCTGCTTAATTGCGATAACGAACGAGACCTTAACCTACTAAATAGTGCTGCTAGCTTTTG 1320
      |||
Sbjct 1287 TCTGCTTAATTGCGATAACGAACGAGACCTTAACCTACTAAATAGTGCTGCTAGCTTTTG 1346

Query 1321 CTGGTATAGTCACTTCTTAGAGGGACTATCGATTTCAAGTCGATGGAAGTTTGAGGCAAT 1380
      |||
Sbjct 1347 CTGGTATAGTCACTTCTTAGAGGGACTATCGATTTCAAGTCGATGGAAGTTTGAGGCAAT 1406

Query 1381 AACAGGTCTGTGATGCCCTTAGACGTTCTGGGCCGCACGCGCGCTACACTGACGGAGCCA 1440
      |||
Sbjct 1407 AACAGGTCTGTGATGCCCTTAGACGTTCTGGGCCGCACGCGCGCTACACTGACGGAGCCA 1466

Query 1441 ACGAGTATTAACCTTGGCCGAGAGGTCTGGGAAATCTTGTGAAACTCCGTCGTGCTGGGG 1500
      |||
Sbjct 1467 ACGAGTATTAACCTTGGCCGAGAGGTCTGGGAAATCTTGTGAAACTCCGTCGTGCTGGGG 1526

Query 1501 ATAGAGCATTGTAATTATTGCTCTTCAACGAGGAATTCCTAGTAAGCGCAAGTCATCAGC 1560
      |||
Sbjct 1527 ATAGAGCATTGTAATTATTGCTCTTCAACGAGGAATTCCTAGTAAGCGCAAGTCATCAGC 1586

Query 1561 TTGCGTTGATTACGTCCCTGCCCTTTGTACACACCGCCCGTCGCTACTACCGATTGAATG 1620
      |||
Sbjct 1587 TTGCGTTGATTACGTCCCTGCCCTTTGTACACACCGCCCGTCGCTACTACCGATTGAATG 1646

Query 1621 GCTTAGTGAGGCCTCCGGATTGGTTTAAAGAAGGGGGCAACTCCATCTTGAACCGAAAA 1680
      |||
Sbjct 1647 GCTTAGTGAGGCCTCCGGATTGGTTTAAAGAAGGGGGCAACTCCATCTTGAACCGAAAA 1706

Query 1681 GCTGGTCAAACCTGGTCATTTAGAGGAAGTAAAAGTCGTAACAAGGTTTCCGTAGGTGAA 1740
      |||
Sbjct 1707 GCTGGTCAAACCTGGTCATTTAGAGGAAGTAAAAGTCGTAACAAGGTTTCCGTAGGTGAA 1766

Query 1741 CCTGCGGAAGGATCATT 1758
      |||
Sbjct 1767 CCTGCGGAAGGATCATT 1784

```

>dbj|AB013528.1| *Candida psychrophila* 18S rRNA gene, strain JCM 2388, partial sequence  
Length=1782

Score = 3201 bits (1733), Expect = 0.0  
Identities = 1750/1757 (99%), Gaps = 5/1757 (0%)  
Strand=Plus/Plus







```

Query 961 ACCGTCGTAGTCTTAACCATAAACTATGCCGACTAGGGATCGGGTGTGTTTC-ttttttt 1019
          |||
Sbjct 1011 ACCGTCGTAGTCTTAACCATAAACTATGCCGACTAGGGATCGGGTGTGTTCTTTTTTTT 1070

Query 1020 GACGCACTCGGCACCTTACGAGAAATCAAAGTCTTTGGGTTCTGGGGGAGTATGGTCCG 1079
          |||
Sbjct 1071 GACGCACTCGGCACCTTACGAGAAATCAAAGTCTTTGGGTTCTGGGGGAGTATGGTCCG 1130

Query 1080 AAGGCTGAAACTTAAAGGAATTGACGGAAGGGCACCACCAGGAGTGGAGCCTGCGGCTTA 1139
          |||
Sbjct 1131 AAGGCTGAAACTTAAAGGAATTGACGGAAGGGCACCACCAGGAGTGGAGCCTGC-GCTTA 1189

Query 1140 ATTTGACTCAACACGGGGAAACTCACCAGGTCCAGACACAATAAGGATTGACAGATTGAG 1199
          |||
Sbjct 1190 ATTTGACTCAACACGGGGAAACTCACCAGGTCCAGACACAATAAGGATTGACAGATTGAG 1249

Query 1200 AGCTCTTTCTTGATTTTGTGGGTGGTGGTGCATGGCCGTTCTTAGTTGGTGGAGTGATTT 1259
          |||
Sbjct 1250 AGCTCTTTCTTGATTTTGTGGGTGGTGGTGCATGGCCGTTCTTAGTTGGTGGAGTGATTT 1309

Query 1260 GTCTGCTTAATTGCGATAACGAACGAGACCTTAACCTACTAAATAGTGCTGCTAGCTTTT 1319
          |||
Sbjct 1310 GTCTGCTTAATTGCGATAACGAACGAGACCTTAACCTACTAAATAGTGCTGCTAGCTTTT 1369

Query 1320 GCTGGTATAGTCACCTTCTTAGAGGGACTATCGATTTCAAGTCGATGGAAGTTTGAGGCAA 1379
          |||
Sbjct 1370 GCTGGTATAGTCACCTTCTTAGAGGGACTATCGATTTCAAGTCGATGGAAGTTTGAGGCAA 1429

Query 1380 TAACAGGTCTGTGATGCCCTTAGACGTTCTGGGCCGCACGCGCGCTACACTGACGGAGCC 1439
          |||
Sbjct 1430 TAACAGGTCTGTGATGCCCTTAGACGTTCTGGGCCGCACGCGCGCTACACTGACGGAGCC 1489

Query 1440 AACGAGTATTAACCTTGCCGAGAGGTCTGGGAAATCTTGTGAAACTCCGTCGTGCTGGG 1499
          |||
Sbjct 1490 AACGAGTATTAACCTTGCCGAGAGGTCTGGGAAATCTTGTGAAACTCCGTCGTGCTGGG 1549

Query 1500 GATAGAGCATTGTAATTATTGCTCTTCAACGAGGAATTCTAGTAAGCGCAAGTCATCAG 1559
          |||
Sbjct 1550 GATAGAGCATTGTAATTATTGCTCTTCAACGAGGAATTCTAGTAAGCGCAAGTCATCAG 1609

Query 1560 CTTGCGTTGATTACGTCCCTGCCCTTTGTACACACCGCCCGTCGCTACTACCGATTGAAT 1619
          |||
Sbjct 1610 CTTGCGTTGATTACGTCCCTGCCCTTTGTACACACCGCCCGTCGCTACTACCGATTGAAT 1669

Query 1620 GGCTTAGTGAGGCCTCCGGATTGGTTTAAAGAAGGGGGCAACTCCATCTTGGAACCGAAA 1679
          |||
Sbjct 1670 GGCTTAGTGAGGCCTCCGGATTGGTTTAAAGAAGGGGGCAACTCCATCTTGGAACCGAAA 1729

Query 1680 AGCTGGTCAAACCTGGTCAATTTAGAGGAAGTAAAAGTCGTAACAAGGTTTCCGTAGGTGA 1739
          |||
Sbjct 1730 AGCTGGTCAAACCTGGTCAATTTAGAGGAAGTAAAAGTCGTAACAAGGTTTCCGTAGGTGA 1789

Query 1740 ACCTGCGGAAGGATCA 1755
          |||
Sbjct 1790 ACCTGCAGAAGGATCA 1805

```

>dbj|AB070854.1| *Debaryomyces hansenii* gene for 18S rRNA, partial sequence  
Length=1752

Score = 3188 bits (1726), Expect = 0.0  
Identities = 1726/1726 (100%), Gaps = 0/1726 (0%)  
Strand=Plus/Plus





```

Query 963 CGTCGTAGTCTTAACCATAAACTATGCCGACTAGGGATCGGGTGTGTTCTtttttttGAC 1022
          |||
Sbjct 987 CGTCGTAGTCTTAACCATAAACTATGCCGACTAGGGATCGGGTGTGTTCTTTTTTTTGGAC 1046

Query 1023 GCACTCGGCACCTTACGAGAAATCAAAGTCTTTGGGTTCTGGGGGAGTATGGTCGCAAG 1082
          |||
Sbjct 1047 GCACTCGGCACCTTACGAGAAATCAAAGTCTTTGGGTTCTGGGGGAGTATGGTCGCAAG 1106

Query 1083 GCTGAAACTTAAAGGAATTGACGGAAGGGCACCACCAGGAGTGGAGCCTGCGGCTTAATT 1142
          |||
Sbjct 1107 GCTGAAACTTAAAGGAATTGACGGAAGGGCACCACCAGGAGTGGAGCCTGCGGCTTAATT 1166

Query 1143 TGA CTCAACACGGGGAAACTCACCAGGTCCAGACACAATAAGGATTGACAGATTGAGAGC 1202
          |||
Sbjct 1167 TGA CTCAACACGGGGAAACTCACCAGGTCCAGACACAATAAGGATTGACAGATTGAGAGC 1226

Query 1203 TCTTTCTTGATTTTGTGGGTGGTGGTGCATGGCCGTTCTTAGTTGGTGGAGTGATTTGTC 1262
          |||
Sbjct 1227 TCTTTCTTGATTTTGTGGGTGGTGGTGCATGGCCGTTCTTAGTTGGTGGAGTGATTTGTC 1286

Query 1263 TGCTTAATTGCGATAACGAACGAGACCTTAACCTACTAAATAGTGCTGCTAGCTTTTGCT 1322
          |||
Sbjct 1287 TGCTTAATTGCGATAACGAACGAGACCTTAACCTACTAAATAGTGCTGCTAGCTTTTGCT 1346

Query 1323 GGTATAGTCACTTCTTAGAGGGACTATCGATTTCAAGTCGATGGAAGTTTGAGGCAATAA 1382
          |||
Sbjct 1347 GGTATAGTCACTTCTTAGAGGGACTATCGATTTCAAGTCGATGGAAGTTTGAGGCAATAA 1406

Query 1383 CAGGTCTGTGATGCCCTTAGACGTTCTGGGCCGCACGCGCGCTACACTGACGGAGCCAAC 1442
          |||
Sbjct 1407 CAGGTCTGTGATGCCCTTAGACGTTCTGGGCCGCACGCGCGCTACACTGACGGAGCCAAC 1466

Query 1443 GAGTATTAACCTTGGCCGAGAGGTCTGGGAAATCTTGTGAAACTCCGTCGTGCTGGGGAT 1502
          |||
Sbjct 1467 GAGTATTAACCTTGGCCGAGAGGTCTGGGAAATCTTGTGAAACTCCGTCGTGCTGGGGAT 1526

Query 1503 AGAGCATTGTAATTATTGCTCTTCAACGAGGAATTCCTAGTAAGCGCAAGTCATCAGCTT 1562
          |||
Sbjct 1527 AGAGCATTGTAATTATTGCTCTTCAACGAGGAATTCCTAGTAAGCGCAAGTCATCAGCTT 1586

Query 1563 GCGTTGATTACGTCCCTGCCCTTTGTACACACCGCCCGTCGCTACTACCGATTGAATGGC 1622
          |||
Sbjct 1587 GCGTTGATTACGTCCCTGCCCTTTGTACACACCGCCCGTCGCTACTACCGATTGAATGGC 1646

Query 1623 TTAGTGAGGCCTCCGGATTGGTTTAAAGAAGGGGGCAACTCCATCTTGAACCGAAAAGC 1682
          |||
Sbjct 1647 TTAGTGAGGCCTCCGGATTGGTTTAAAGAAGGGGGCAACTCCATCTTGAACCGAAAAGC 1706

Query 1683 TGGTCAAACCTGGTCATTTAGAGGAAGTAAAAGTCGTAACAAGGTT 1728
          |||
Sbjct 1707 TGGTCAAACCTGGTCATTTAGAGGAAGTAAAAGTCGTAACAAGGTT 1752

```

>dbj|AB106349.1| *Debaryomyces hansenii* var. *hansenii* gene for 18S rRNA, partial sequence  
Length=1752

Score = 3188 bits (1726), Expect = 0.0  
Identities = 1726/1726 (100%), Gaps = 0/1726 (0%)  
Strand=Plus/Plus

```

Query 3 GCCATGCATGTCTAAGTATAAGCAATTTATACAGTGAAACTGCGAATGGCTCATTAAATC 62
          |||

```

|       |     |                                                                |      |
|-------|-----|----------------------------------------------------------------|------|
| Sbjct | 27  | GCCATGCATGTCTAAGTATAAGCAATTTATACAGTGAAACTGCGAATGGCTCATTAAATC   | 86   |
| Query | 63  | AGTTATCGTTTATTTGATAGTACCTTTACTACTTGGATAACCGTGGTAATTCTAGAGCTA   | 122  |
| Sbjct | 87  | AGTTATCGTTTATTTGATAGTACCTTTACTACTTGGATAACCGTGGTAATTCTAGAGCTA   | 146  |
| Query | 123 | ATACATGCTAAAAATCCCGACTGTTTGGGAAGGGATGTATTTATTAGATAAAAAATCAATG  | 182  |
| Sbjct | 147 | ATACATGCTAAAAATCCCGACTGTTTGGGAAGGGATGTATTTATTAGATAAAAAATCAATG  | 206  |
| Query | 183 | CTTTTCGGAGCTCTTTGATGATTCAATAAATCTTTTCGAATCGCATGGCCTTGTGCTGGC   | 242  |
| Sbjct | 207 | CTTTTCGGAGCTCTTTGATGATTCAATAAATCTTTTCGAATCGCATGGCCTTGTGCTGGC   | 266  |
| Query | 243 | GATGGTTCATTCAAATTTCTGCCCTATCAACTTTTCGATGGTAGGATAGTGGCCTACCATG  | 302  |
| Sbjct | 267 | GATGGTTCATTCAAATTTCTGCCCTATCAACTTTTCGATGGTAGGATAGTGGCCTACCATG  | 326  |
| Query | 303 | GTTTCAACGGGTAACGGGGAATAAGGGTTCGATTCCGGAGAGGGAGCCTGAGAAACGGCT   | 362  |
| Sbjct | 327 | GTTTCAACGGGTAACGGGGAATAAGGGTTCGATTCCGGAGAGGGAGCCTGAGAAACGGCT   | 386  |
| Query | 363 | ACCACATCCAAGGAAGGCAGCAGGCGCGCAAATTACCCAATCCCGACACGGGGAGGTAGT   | 422  |
| Sbjct | 387 | ACCACATCCAAGGAAGGCAGCAGGCGCGCAAATTACCCAATCCCGACACGGGGAGGTAGT   | 446  |
| Query | 423 | GACAATAAATAACGATACAGGGCCCTTTTCGGGTCTTGTAAATTGGAATGAGTACAATGTAA | 482  |
| Sbjct | 447 | GACAATAAATAACGATACAGGGCCCTTTTCGGGTCTTGTAAATTGGAATGAGTACAATGTAA | 506  |
| Query | 483 | ATACCTTAACGAGGAACAATTGGAGGGCAAGTCTGGTGCCAGCAGCCGCGGTAATTCCAG   | 542  |
| Sbjct | 507 | ATACCTTAACGAGGAACAATTGGAGGGCAAGTCTGGTGCCAGCAGCCGCGGTAATTCCAG   | 566  |
| Query | 543 | CTCCAATAGCGTATATTAAGTTGTTGCAGTTAAAAAGCTCGTAGTTGAACCTTGGGCTT    | 602  |
| Sbjct | 567 | CTCCAATAGCGTATATTAAGTTGTTGCAGTTAAAAAGCTCGTAGTTGAACCTTGGGCTT    | 626  |
| Query | 603 | GGTTGGCCGGTCCGCCTTTTTGGCGAGTACTGGACCCAACCGAGCCTTTCCTTCTGGCTA   | 662  |
| Sbjct | 627 | GGTTGGCCGGTCCGCCTTTTTGGCGAGTACTGGACCCAACCGAGCCTTTCCTTCTGGCTA   | 686  |
| Query | 663 | ACCTTTCGCCCTTGTGGTGTGGCGAACCAGGACTTTTACTTTGAAAAATTAGAGTGT      | 722  |
| Sbjct | 687 | ACCTTTCGCCCTTGTGGTGTGGCGAACCAGGACTTTTACTTTGAAAAATTAGAGTGT      | 746  |
| Query | 723 | TCAAAGCAGGCCTTTGCTCGAATATATTAGCATGGAATAATAGAATAGGACGTTATGGTT   | 782  |
| Sbjct | 747 | TCAAAGCAGGCCTTTGCTCGAATATATTAGCATGGAATAATAGAATAGGACGTTATGGTT   | 806  |
| Query | 783 | CTATTTTGTGGTTTCTAGGACCATCGTAATGATTAATAGGGACGGTCGGGGGCATCAGT    | 842  |
| Sbjct | 807 | CTATTTTGTGGTTTCTAGGACCATCGTAATGATTAATAGGGACGGTCGGGGGCATCAGT    | 866  |
| Query | 843 | ATTCAGTTGTCAGAGGTGAAATTCTTGGATTACCTGAAGACTAACTACTGCGAAAGCATT   | 902  |
| Sbjct | 867 | ATTCAGTTGTCAGAGGTGAAATTCTTGGATTACCTGAAGACTAACTACTGCGAAAGCATT   | 926  |
| Query | 903 | TGCCAAGGACGTTTTTCATTAATCAAGAACGAAAGTTAGGGGATCGAAGATGATCAGATAC  | 962  |
| Sbjct | 927 | TGCCAAGGACGTTTTTCATTAATCAAGAACGAAAGTTAGGGGATCGAAGATGATCAGATAC  | 986  |
| Query | 963 | CGTCGTAGTCTTAACCATAAACTATGCCGACTAGGGATCGGGTGTGTTCTtttttttGAC   | 1022 |

|       |      |                                                              |      |
|-------|------|--------------------------------------------------------------|------|
| Sbjct | 987  | CGTCGTAGTCTTAACCATAAACTATGCCGACTAGGGATCGGGTGTGTTCTTTTTTTGAC  | 1046 |
| Query | 1023 | GCACTCGGCACCTTACGAGAAATCAAAGTCTTTGGGTTCTGGGGGAGTATGGTCGCAAG  | 1082 |
| Sbjct | 1047 | GCCTCGGCACCTTACGAGAAATCAAAGTCTTTGGGTTCTGGGGGAGTATGGTCGCAAG   | 1106 |
| Query | 1083 | GCTGAAACTTAAAGGAATTGACGGAAGGGCACCACCAGGAGTGGAGCCTGCGGCTTAATT | 1142 |
| Sbjct | 1107 | GCTGAAACTTAAAGGAATTGACGGAAGGGCACCACCAGGAGTGGAGCCTGCGGCTTAATT | 1166 |
| Query | 1143 | TGACTCAACACGGGGAAACTCACCAGGTCCAGACACAATAAGGATTGACAGATTGAGAGC | 1202 |
| Sbjct | 1167 | TGACTCAACACGGGGAAACTCACCAGGTCCAGACACAATAAGGATTGACAGATTGAGAGC | 1226 |
| Query | 1203 | TCTTTCTTGATTTTGTGGGTGGTGGTGCATGGCCGTTCTTAGTTGGTGGAGTGATTTGTC | 1262 |
| Sbjct | 1227 | TCTTTCTTGATTTTGTGGGTGGTGGTGCATGGCCGTTCTTAGTTGGTGGAGTGATTTGTC | 1286 |
| Query | 1263 | TGCTTAATTGCGATAACGAACGAGACCTTAACCTACTAAATAGTGCTGCTAGCTTTTGCT | 1322 |
| Sbjct | 1287 | TGCTTAATTGCGATAACGAACGAGACCTTAACCTACTAAATAGTGCTGCTAGCTTTTGCT | 1346 |
| Query | 1323 | GGTATAGTCACTTCTTAGAGGGACTATCGATTTCAAGTCGATGGAAGTTTGAGGCAATAA | 1382 |
| Sbjct | 1347 | GGTATAGTCACTTCTTAGAGGGACTATCGATTTCAAGTCGATGGAAGTTTGAGGCAATAA | 1406 |
| Query | 1383 | CAGGTCTGTGATGCCCTTAGACGTTCTGGGCCGCACGCGCTACACTGACGGAGCCAAC   | 1442 |
| Sbjct | 1407 | CAGGTCTGTGATGCCCTTAGACGTTCTGGGCCGCACGCGCTACACTGACGGAGCCAAC   | 1466 |
| Query | 1443 | GAGTATTAACCTTGGCCGAGAGGTCTGGGAAATCTTGTGAAACTCCGTCGTGCTGGGGAT | 1502 |
| Sbjct | 1467 | GAGTATTAACCTTGGCCGAGAGGTCTGGGAAATCTTGTGAAACTCCGTCGTGCTGGGGAT | 1526 |
| Query | 1503 | AGAGCATTGTAATTATTGCTCTTCAACGAGGAATTCCTAGTAAGCGCAAGTCATCAGCTT | 1562 |
| Sbjct | 1527 | AGAGCATTGTAATTATTGCTCTTCAACGAGGAATTCCTAGTAAGCGCAAGTCATCAGCTT | 1586 |
| Query | 1563 | GCGTTGATTACGTCCCTGCCCTTTGTACACACCGCCCGTCGCTACTACCGATTGAATGGC | 1622 |
| Sbjct | 1587 | GCGTTGATTACGTCCCTGCCCTTTGTACACACCGCCCGTCGCTACTACCGATTGAATGGC | 1646 |
| Query | 1623 | TTAGTGAGGCCTCCGGATTGGTTTAAAGAAGGGGGCAACTCCATCTTGAACCGAAAAGC  | 1682 |
| Sbjct | 1647 | TTAGTGAGGCCTCCGGATTGGTTTAAAGAAGGGGGCAACTCCATCTTGAACCGAAAAGC  | 1706 |
| Query | 1683 | TGGTCAAACCTTGGTCATTTAGAGGAAGTAAAAGTCGTAACAAGGTT              | 1728 |
| Sbjct | 1707 | TGGTCAAACCTTGGTCATTTAGAGGAAGTAAAAGTCGTAACAAGGTT              | 1752 |

>dbj|AB013525.1| *Candida fermenticarens* 18S rRNA gene, strain JCM 9589, partial sequence  
Length=1783

Score = 3186 bits (1725), Expect = 0.0  
Identities = 1747/1757 (99%), Gaps = 4/1757 (0%)  
Strand=Plus/Plus

|       |    |                                                              |     |
|-------|----|--------------------------------------------------------------|-----|
| Query | 3  | GCCATGCATGTCTAAGTATAAGCAATTTATACAGTGAAACTGCGAATGGCTCATTAAATC | 62  |
| Sbjct | 30 | GCCATGCATGTCTAAGTATAAGCAATTTATACAGTGAAACTGCGAATGGCTCATTAAATC | 89  |
| Query | 63 | AGTTATCGTTTATTTGATAGTACCTTTACTACTTGGATAACCGTGGTAATTCTAGAGCTA | 122 |

|       |      |                                                                    |      |
|-------|------|--------------------------------------------------------------------|------|
| Sbjct | 90   | <br>AGTTATCGTTTATTTGATAGTACCTTTACTACTTGGATAACCGTGGTAATTCTAGAGCTA   | 149  |
| Query | 123  | ATACATGCTAAAAATCCCGACTGTTTGGGAAGGGATGTATTTATTAGATAAAAAATCAATG      | 182  |
| Sbjct | 150  | <br>ATACATGCTAAAAATCCCGACTGTTTGGGAAGGGATGTATTTATTAGATAAAAAATCAATG  | 209  |
| Query | 183  | CTTTTCGGAGCTCTTTGATGATTATAATAACTTTTCGAATCGCATGGCCTTGTGCTGGC        | 242  |
| Sbjct | 210  | <br>CTTTTCGGAGCTCTTTGATGATTATAATAACTTTTCGAATCGCATGGCCTTGTGCTGGC    | 269  |
| Query | 243  | GATGGTTCATTCAAATTTCTGCCCTATCAACTTTTCGATGGTAGGATAGTGGCCTACCATG      | 302  |
| Sbjct | 270  | <br>GATGGTTCATTCAAATTTCTGCCCTATCAACTTTTCGATGGTAGGATAGTGGCCTACCATG  | 329  |
| Query | 303  | GTTTCAACGGGTAACGGGGAATAAGGGTTCGATTCCGGAGAGGGAGCCTGAGAAACGGCT       | 362  |
| Sbjct | 330  | <br>GTTTCAACGGGTAACGGGGAATAAGGGTTCGATTCCGGAGAGGGAGCCTGAGAAACGGCT   | 389  |
| Query | 363  | ACCACATCCAAGGAAGGCAGCAGGCGCGCAAATTACCCAATCCCGACACGGGGAGGTAGT       | 422  |
| Sbjct | 390  | <br>ACCACATCCAAGGAAGGCAGCAGGCGCGCAAATTACCCAATCCCGACACGGGGAGGTAGT   | 449  |
| Query | 423  | GACAATAAATAACGATACAGGGCCCTTTTCGGGTCTTGTAAATTGGAATGAGTACAATGTAA     | 482  |
| Sbjct | 450  | <br>GACAATAAATAACGATACAGGGCCCTTTTCGGGTCTTGTAAATTGGAATGAGTACAATGTAA | 509  |
| Query | 483  | ATACCTTAACGAGGAACAATTGGAGGGCAAGTCTGGTGCCAGCAGCCGCGGTAATTCAG        | 542  |
| Sbjct | 510  | <br>ATACCTTAACGAGGAACAATTGGAGGGCAAGTCTGGTGCCAGCAGCCGCGGTAATTCAG    | 569  |
| Query | 543  | CTCCAATAGCGTATATTAAAGTTGTTGCAGTTAAAAAGCTCGTAGTTGAACCTTGGGCTT       | 602  |
| Sbjct | 570  | <br>CTCCAATAGCGTATATTAAAGTTGTTGCAGTTAAAAAGCTCGTAGTTGAACCTTGGGCTT   | 629  |
| Query | 603  | GGTTGGCCGGTCCGCCTTTTTGGCGAGTACTGGACCCAACCGAGCCTTTCCTTCTGGCTA       | 662  |
| Sbjct | 630  | <br>GGTTGGCCGGTCCGCCTTTT-GGCGAGTACTGGACCCAACCGAGCCTTTCCTTCTGGCTA   | 688  |
| Query | 663  | ACCTTTCGCCCTTGTGGTGTGGCGAACCAGGACTTTTACTTTGAAAAAATTAGAGTGT         | 722  |
| Sbjct | 689  | <br>ACCATGCACCCTTGTGGTGTATGGCGAACCAGGACTTTTACTTTGAAAAAATTAGAGTGT   | 748  |
| Query | 723  | TCAAAGCAGGCCTTTGCTCGAATATATTAGCATGGAATAATAGAATAGGACGTTATGGTT       | 782  |
| Sbjct | 749  | <br>TCAAAGCAGGCCTTTGCTCGAATATATTAGCATGGAATAATAGAATAGGACGTTATGGTT   | 808  |
| Query | 783  | CTATTTTGTGGTTTCTAGGACCATCGTAATGATTAATAGGGACGGTCGGGGGCATCAGT        | 842  |
| Sbjct | 809  | <br>CTATTTTGTGGTTTCTAGGACCATCGTAATGATTAATAGGGACGGTCGGGGGCATCAGT    | 868  |
| Query | 843  | ATTCAGTTGTCAGAGGTGAAATTCTTGGATT-ACCTGAAGACTAACTACTGCGAAAGCAT       | 901  |
| Sbjct | 869  | <br>ATTCAGTTGTCAGAGGTGAAATTCTTGGATT-TGAAGACTAACTACTGCGAAAGCAT      | 927  |
| Query | 902  | TTGCCAAGGACGTTTTCATTAATCAAGAACGAAAGTTAGGGGATCGAAGATGATCAGATA       | 961  |
| Sbjct | 928  | <br>TTGCCAAGGACGTTTTCATTAATCAAGAACGAAAGTTAGGGGATCGAAGATGATCAGATA   | 987  |
| Query | 962  | CCGTCGTAGTCTTAACCATAAACTATGCCGACTAGGGATCGGGTGTGTTCTtttttttGA       | 1021 |
| Sbjct | 988  | <br>CCGTCGTAGTCTTAACCATAAACTATGCCGACTAGGGATCGGGTGTGTTCTTTTTTTTGA   | 1047 |
| Query | 1022 | CGCACTCGGCACCTTACGAGAAATCAAAGTCTTTGGGTTCTGGGGGAGTATGGTCGCAA        | 1081 |

|       |      |                                                                   |      |
|-------|------|-------------------------------------------------------------------|------|
| Sbjct | 1048 | <br>CGCACTCGGCACCTTACGAGAAATCAAAGTCTTTGGGTTCTGGGGGAGTATGGTCGCAA   | 1107 |
| Query | 1082 | GGCTGAAACTTAAAGGAATTGACGGAAGGGCACCACCAGGAGTGGAGCCTGCGGCTTAAT      | 1141 |
| Sbjct | 1108 | <br>GGCTGAAACTTAAAGGAATTGACGGAAGGGCACCACCAGGAGTGGAGCCTGCGGCTTAAT  | 1167 |
| Query | 1142 | TTGACTCAACACGGGGAAACTCACCAGGTCCAGACACAATAAGGATTGACAGATTGAGAG      | 1201 |
| Sbjct | 1168 | <br>TTGACTCAACACGGGGAAACTCACCAGGTCCAGACACAATAAGGATTGACAGATTGAGAG  | 1227 |
| Query | 1202 | CTCTTTCTTGATTTTGTGGGTGGTGGTGCATGGCCGTTCTTAGTTGGTGGAGTGATTTGT      | 1261 |
| Sbjct | 1228 | <br>CTCTTTCTTGATTTTGTGGGTGGTGGTGCATGGCCGTTCTTAGTTGGTGGAGTGATTTGT  | 1287 |
| Query | 1262 | CTGCTTAATTGCGATAACGAACGAGACCTTAACCTACTAAATAGTGCTGCTAGCTTTTGC      | 1321 |
| Sbjct | 1288 | <br>CTGCTTAATTGCGATAACGAACGAGACCTTAACCTACTAAATAGTGCTGCTAGCTTTTGC  | 1347 |
| Query | 1322 | TGGTATAGTCACTTCTTAGAGGGACTATCGATTTCAAGTCGATGGAAGTTTGAGGCAATA      | 1381 |
| Sbjct | 1348 | <br>TGGTATAGTCACTTCTTAGAGGGACTATCGATTTCAAGTCGATGGAAGTTTGAGGCAATA  | 1407 |
| Query | 1382 | ACAGGTCTGTGATGCCCTTAGACGTTCTGGGCCGCACGCGCGCTTACACTGACGGAGCCAA     | 1441 |
| Sbjct | 1408 | <br>ACAGGTCTGTGATGCCCTTAGACGTTCTGGGCCGCACGCGCGCTTACACTGACGGAGCCAA | 1467 |
| Query | 1442 | CGAGTATTAACCTTGGCCGAGAGGTCTGGGAAATCTTGTGAAACTCCGTCGTGCTGGGGA      | 1501 |
| Sbjct | 1468 | <br>CGAGTATTAACCTTGGCCGAGAGGTCTGGGAAATCTTGTGAAACTCCGTCGTGCTGGGGA  | 1527 |
| Query | 1502 | TAGAGCATTGTAATTATTGCTCTTCAACGAGGAATTCCTAGTAAGCGCAAGTCATCAGCT      | 1561 |
| Sbjct | 1528 | <br>TAGAGCATTGTAATTATTGCTCTTCAACGAGGAATTCCTAGTAAGCGCAAGTCATCAGCT  | 1587 |
| Query | 1562 | TGCGTTGATTACGTCCCTGCCCTTTGTACACACCGCCCGTCGCTACTACCGATTGAATGG      | 1621 |
| Sbjct | 1588 | <br>TGCGTTGATTACGTCCCTGCCCTTTGTACACACCGCCCGTCGCTACTACCGATTGAATGG  | 1647 |
| Query | 1622 | CTTAGTGAGGCCTCCGGATTGGTTTTAAAGAAGGGGGCAACTCCATCTTGAACCGAAAAG      | 1681 |
| Sbjct | 1648 | <br>CTTAGTGAGGCCTCCGGATTGGTTTTAAAGAAGGGGGCAACTCCATCTTGAACCGAAAAG  | 1707 |
| Query | 1682 | CTGGTCAAACCTGGTCAATTTAGAGGAAGTAAAAGTCGTAACAAGGTTTCCGTAGGTGAAC     | 1741 |
| Sbjct | 1708 | <br>CTGGTCAAACCTGGTCAATTTAGAGGAAGTAAAAGTCGTAACAAGGTTTCCGTAG-TGAAC | 1766 |
| Query | 1742 | CTGCGGAAGGATCATT                                                  | 1758 |
| Sbjct | 1767 | <br>CTGCGGAAGGATCATT                                              | 1783 |

>gb|AY520288.1| Candida sp. BG02-6-6-2-1 18S ribosomal RNA gene, partial sequence  
Length=1741

Score = 3182 bits (1723), Expect = 0.0  
Identities = 1730/1733 (99%), Gaps = 2/1733 (0%)  
Strand=Plus/Plus

|       |    |                                                                  |     |
|-------|----|------------------------------------------------------------------|-----|
| Query | 3  | GCCATGCATGTCTAAGTATAAGCAATTTATACAGTGAAACTGCGAATGGCTCATTAAATC     | 62  |
| Sbjct | 10 | <br>GCCATGCATGTCTAAGTATAAGCAATTTATACAGTGAAACTGCGAATGGCTCATTAAATC | 69  |
| Query | 63 | AGTTATCGTTTATTTGATAGTACCTTTACTACTTGGATAACCGTGGTAATTCTAGAGCTA     | 122 |

|       |      |                                                                    |      |
|-------|------|--------------------------------------------------------------------|------|
| Sbjct | 70   | <br>AGTTATCGTTTATTTGATAGTACCTTTACTACTTGGATAACCGTGGTAATTCTAGAGCTA   | 129  |
| Query | 123  | ATACATGCTAAAAATCCCGACTGTTTGGGAAGGGATGTATTTATTAGATAAAAAATCAATG      | 182  |
| Sbjct | 130  | <br>ATACATGCTAAAAATCCCGACTGTTTGGGAAGGGATGTATTTATTAGATAAAAAATCAATG  | 189  |
| Query | 183  | CTTTTCGGAGCTCTTTGATGATTCATAATAACTTTTCGAATCGCATGGCCTTGTGCTGGC       | 242  |
| Sbjct | 190  | <br>CTTTTCGGAGCTCTTTGATGATTCATAATAACTTTTCGAATCGCATGGCCTTGTGCTGGC   | 249  |
| Query | 243  | GATGGTTCATTCAAATTTCTGCCCTATCAACTTTTCGATGGTAGGATAGTGGCCTACCATG      | 302  |
| Sbjct | 250  | <br>GATGGTTCATTCAAATTTCTGCCCTATCAACTTTTCGATGGTAGGATAGTGGCCTACCATG  | 309  |
| Query | 303  | GTTTCAACGGGTAACGGGGAATAAGGGTTCGATTCCGGAGAGGGAGCCTGAGAAACGGCT       | 362  |
| Sbjct | 310  | <br>GTTTCAACGGGTAACGGGGAATAAGGGTTCGATTCCGGAGAGGGAGCCTGAGAAACGGCT   | 369  |
| Query | 363  | ACCACATCCAAGGAAGGCAGCAGGCGCGCAAATTACCCAATCCCGACACGGGGAGGTAGT       | 422  |
| Sbjct | 370  | <br>ACCACATCCAAGGAAGGCAGCAGGCGCGCAAATTACCCAATCCCGACACGGGGAGGTAGT   | 429  |
| Query | 423  | GACAATAAATAACGATACAGGGCCCTTTTCGGGTCTTGTAAATTGGAATGAGTACAATGTAA     | 482  |
| Sbjct | 430  | <br>GACAATAAATAACGATACAGGGCCCTTTTCGGGTCTTGTAAATTGGAATGAGTACAATGTAA | 489  |
| Query | 483  | ATACCTTAACGAGGAACAATTGGAGGGCAAGTCTGGTGCCAGCAGCCGCGGTAATTCAG        | 542  |
| Sbjct | 490  | <br>ATACCTTAACGAGGAACAATTGGAGGGCAAGTCTGGTGCCAGCAGCCGCGGTAATTCAG    | 549  |
| Query | 543  | CTCCAATAGCGTATATTAAAGTTGTTGCAGTTAAAAAGCTCGTAGTTGAACCTTGGGCTT       | 602  |
| Sbjct | 550  | <br>CTCCAATAGCGTATATTAAAGTTGTTGCAGTTAAAAAGCTCGTAGTTGAACCTTGGGCTT   | 609  |
| Query | 603  | GGTTGGCCGGTCCGCCTTTTTGGCGAGTACTGGACCCAACCGAGCCTTTCCTTCTGGCTA       | 662  |
| Sbjct | 610  | <br>GGTTGGCCGGTCCGCCTTTTTGGCGAGTACTGGACCCAACCGAGCCTTTCCTTCTGGCTA   | 669  |
| Query | 663  | ACCTTTCGCCCTTGTGGTGTGGCGAACCAGGACTTTTACTTTGAAAAATTAGAGTGT          | 722  |
| Sbjct | 670  | <br>ACCTTTCGCCCTTGTGGTGTGGCGAACCAGGACTTTTACTTTGAAAAATTAGAGTGT      | 729  |
| Query | 723  | TCAAAGCAGGCCTTTGCTCGAATATATTAGCATGGAATAATAGAATAGGACGTTATGGTT       | 782  |
| Sbjct | 730  | <br>TCAAAGCAGGCCTTTGCTCGAATATATTAGCATGGAATAATAGAATAGGACGTTATGGTT   | 789  |
| Query | 783  | CTATTTTGTGGTTTCTAGGACCATCGTAATGATTAATAGGGACGGTCGGGGGCATCAGT        | 842  |
| Sbjct | 790  | <br>CTATTTTGTGGTTTCTAGGACCATCGTAATGATTAATAGGGACGGTCGGGGGCATCAGT    | 849  |
| Query | 843  | ATTCAGTTGTCAGAGGTGAAATTCTTGGA-TTACCTGAAGACTAACTACTGCGAAAGCAT       | 901  |
| Sbjct | 850  | <br>ATTCAGTTGTCAGAGGTGAAATTCTTGGA-TTACCTGAAGACTAACTACTGCGAAAGCAT   | 908  |
| Query | 902  | TTGCCAAGGACGTTTTCATTAATCAAGAACGAAAGTTAGGGGATCGAAGATGATCAGATA       | 961  |
| Sbjct | 909  | <br>TTGCCAAGGACGTTTTCATTAATCAAGAACGAAAGTTAGGGGATCGAAGATGATCAGATA   | 968  |
| Query | 962  | CCGTCGTAGTCTTAACCATAAACTATGCCGACTAGGGATCGGGTGTGTTCTtttttttGA       | 1021 |
| Sbjct | 969  | <br>CCGTCGTAGTCTTAACCATAAACTATGCCGACTAGGGATCGGGTGTGTTCTTTTTTTGA    | 1028 |
| Query | 1022 | CGCACTCGGCACCTTACGAGAAATCAAAGTCTTTGGGTTCTGGGGGAGTATGGTCGCAA        | 1081 |

|       |      |                                                                   |      |
|-------|------|-------------------------------------------------------------------|------|
| Sbjct | 1029 | <br>CGCACTCGGCACCTTACGAGAAATCAAAGTCTTTGGGTTCTGGGGGAGTATGGTCGCAA   | 1088 |
| Query | 1082 | GGCTGAAACTTAAAGGAATTGACGGAAGGGCACCACCAGGAGTGGAGCCTGCGGCTTAAT      | 1141 |
| Sbjct | 1089 | <br>GGCTGAAACTTAAAGGAATTGACGGAAGGGCACCACCAGGAGTGGAGCCTGCGGCTTAAT  | 1148 |
| Query | 1142 | TTGACTCAACACGGGGAAACTCACCAGGTCCAGACACAATAAGGATTGACAGATTGAGAG      | 1201 |
| Sbjct | 1149 | <br>TTGACTCAACACGGGGAAACTCACCAGGTCCAGACACAATAAGGATTGACAGATTGAGAG  | 1208 |
| Query | 1202 | CTCTTTCTTGATTTTGTGGGTGGTGGTGCATGGCCGTTCTTAGTTGGTGGAGTGATTTGT      | 1261 |
| Sbjct | 1209 | <br>CTCTTTCTTGATTTTGTGGGTGGTGGTGCATGGCCGTTCTTAGTTGGTGGAGTGATTTGT  | 1268 |
| Query | 1262 | CTGCTTAATTGCGATAACGAACGAGACCTTAACCTACTAAATAGTGCTGCTAGCTTTTGC      | 1321 |
| Sbjct | 1269 | <br>CTGCTTAATTGCGATAACGAACGAGACCTTAACCTACTAAATAGTGCTGCTAGCTTTTGC  | 1328 |
| Query | 1322 | TGGTATAGTCACTTCTTAGAGGGACTATCGATTTCAAGTCGATGGAAGTTTGAGGCAATA      | 1381 |
| Sbjct | 1329 | <br>TGGTATAGTCACTTCTTAGAGGGACTATCGATTTCAAGTCGATGGAAGTTTGAGGCAATA  | 1388 |
| Query | 1382 | ACAGGTCTGTGATGCCCTTAGACGTTCTGGGCCGCACGCGCGCTACACTGACGGAGCCAA      | 1441 |
| Sbjct | 1389 | <br>ACAGGTCTGTGATGCCCTTAGACGTTCTGGGCCGCACGCGCGCTACACTGACGGAGCCAA  | 1448 |
| Query | 1442 | CGAGTATTAACCTTGGCCGAGAGGTCTGGGAAATCTTGTGAAACTCCGTCGTGCTGGGGA      | 1501 |
| Sbjct | 1449 | <br>CGAGTATTAACCTTGGCCGAGAGGTCTGGGAAATCTTGTGAAACTCCGTCGTGCTGGGGA  | 1508 |
| Query | 1502 | TAGAGCATTGTAATTATTGCTCTTCAACGAGGAATTCCTAGTAAGCGCAAGTCATCAGCT      | 1561 |
| Sbjct | 1509 | <br>TAGAGCATTGTAATTATTGCTCTTCAACGAGGAATTCCTAGTAAGCGCAAGTCATCAGCT  | 1568 |
| Query | 1562 | TGCGTTGATTACGTCCCTGCCCTTTGTACACACCGCCCGTCGCTACTACCGATTGAATGG      | 1621 |
| Sbjct | 1569 | <br>TGCGTTGATTACGTCCCTGCCCTTTGTACACACCGCCCGTCGCTACTACCGATTGAATGG  | 1628 |
| Query | 1622 | CTTAGTGAGGCCTCCGGATTGGTTTTAAAGAAGGGGGCAACTCCATCTTGGAACCGAAAAG     | 1681 |
| Sbjct | 1629 | <br>CTTAGTGAGGCCTCCGGATTGGTTTTAAAGAAGGGGGCAACTCCATCTTGGAACCGAAAAG | 1688 |
| Query | 1682 | CTGGTCAAACCTGGTCAATTTAGAGGAAGTAAAAGTCGTAACAAGGTTTCCGTA            | 1734 |
| Sbjct | 1689 | <br>CTGGTCAAACCTGGTCAATTTAGAGGAAGTAAAAGTCGTAACAAGGTTTCCGTA        | 1741 |

>gb|AY518523.1| *Candida athensensis* strain BG02-7-13-014-3-1 18S ribosomal RNA gene, partial sequence  
Length=1761

Score = 3181 bits (1722), Expect = 0.0  
Identities = 1745/1755 (99%), Gaps = 5/1755 (0%)  
Strand=Plus/Plus

|       |    |                                                                  |     |
|-------|----|------------------------------------------------------------------|-----|
| Query | 3  | GCCATGCATGTCTAAGTATAAGCAATTTATACAGTGAAACTGCGAATGGCTCATTAAATC     | 62  |
| Sbjct | 10 | <br>GCCATGCATGTCTAAGTATAAGCAATTTATACAGTGAAACTGCGAATGGCTCATTAAATC | 69  |
| Query | 63 | AGTTATCGTTTATTTGATAGTACCTTTACTACTTGGATAACCGTGGTAATTCTAGAGCTA     | 122 |
| Sbjct | 70 | <br>AGTTATCGTTTATTTGATAGTACCTTTACTACTTGGATAACCGTGGTAATTCTAGAGCTA | 129 |





```

Query 1081 AGGCTGAAACTTAAAGGAATTGACGGAAGGGCACCACCAGGAGTGGAGCCTGCGGCTTAA 1140
          |||
Sbjct 1087 AGGCTGAAACTTAAAGGAATTGACGGAAGGGCACCACCAGGAGTGGAGCCTGCGGCTTAA 1146

Query 1141 TTTGACTCAACACGGGGAAACTCACCAGGTCAGACACAATAAGGATTGACAGATTGAGA 1200
          |||
Sbjct 1147 TTTGACTCAACACGGGGAAACTCACCAGGTCAGACACAATAAGGATTGACAGATTGAGA 1206

Query 1201 GCTCTTTCTTGATTTTGTGGGTGGTGGTGCATGGCCGTTCTTAGTTGGTGGAGTGATTTG 1260
          |||
Sbjct 1207 GCTCTTTCTTGATTTTGTGGGTGGTGGTGCATGGCCGTTCTTAGTTGGTGGAGTGATTTG 1266

Query 1261 TCTGCTTAATTGCGATAACGAACGAGACCTAACCTACTAAATAGTGCTGCTAGCTTTTG 1320
          |||
Sbjct 1267 TCTGCTTAATTGCGATAACGAACGAGACCTAACCTACTAAATAGTGCTGCTAGCTTTTG 1326

Query 1321 CTGGTATAGTCACTTCTTAGAGGGACTATCGATTTCAAGTCGATGGAAGTTTGAGGCAAT 1380
          |||
Sbjct 1327 CTGGTATAGTCACTTCTTAGAGGGACTATCGATTTCAAGTCGATGGAAGTTTGAGGCAAT 1386

Query 1381 AACAGGTCTGTGATGCCCTTAGACGTTCTGGGCCGCACGCGCTACACTGACGGAGCCA 1440
          |||
Sbjct 1387 AACAGGTCTGTGATGCCCTTAGACGTTCTGGGCCGCACGCGCTACACTGACGGAGCCA 1446

Query 1441 ACGAGTATTAACCTTGGCCGAGAGGTCTGGGAAATCTTGTGAAACTCCGTCGTGCTGGGG 1500
          |||
Sbjct 1447 GCGAGTATTAACCTTGGCCGAGAGGTCTGGGAAATCTTGTGAAACTCCGTCGTGCTGGGG 1506

Query 1501 ATAGAGCATTGTAATTATTGCTCTTCAACGAGGAATTCCTAGTAAGCGCAAGTCATCAGC 1560
          |||
Sbjct 1507 ATAGAGCATTGTAATTATTGCTCTTCAACGAGGAATTCCTAGTAAGCGCAAGTCATCAGC 1566

Query 1561 TTGCGTTGATTACGTCCCTGCCCTTTGTACACACCGCCCGTCGCTACTACCGATTGAATG 1620
          |||
Sbjct 1567 TTGCGTTGATTACGTCCCTGCCCTTTGTACACACCGCCCGTCGCTACTACCGATTGAATG 1626

Query 1621 GCTTAGTGAGGCCTCCGGATTGGTTTAAAGAAGGGGGCAACTCCATCTTGAACCGAAAA 1680
          |||
Sbjct 1627 GCTTAGTGAGGCCTCCGGATTGGTTTAAAGAAGGGGGCAACTCCATCTTGAACCGAAAA 1686

Query 1681 GCTGGTCAAACCTGGTCATTTAGAGGAAGTAAAAGTCGTAACAAGGTTTCCGTAGGTGAA 1740
          |||
Sbjct 1687 GCTGGTCAAACCTGGTCATTTAGAGGAAGTAAAAGTCGTAACAAGGTTTCCGTAGGTGAA 1746

Query 1741 CCTGCGGAAGGATCA 1755
          |||
Sbjct 1747 CCTGCGGAAGGATCA 1761

```

>dbj|AB013513.1| Pichia farinosa 18S rRNA gene, strain JCM 8895, partial sequence  
Length=1785

Score = 3177 bits (1720), Expect = 0.0  
Identities = 1746/1758 (99%), Gaps = 4/1758 (0%)  
Strand=Plus/Plus

```

Query 3 GCCATGCATGTCTAAGTATAAGCAATTTATACAGTGAAACTGCGAATGGCTCATTAAATC 62
          |||
Sbjct 30 GCCATGCATGTCTAAGTATAAGCAATTTATACAGTGAAACTGCGAATGGCTCATTAAATC 89

Query 63 AGTTATCGTTTATTTGATAGTACCTTTACTACTTGGATAACCGTGGTAATTCTAGAGCTA 122
          |||
Sbjct 90 AGTTATCGTTTATTTGATAGTACCTTTACTACTTGGATAACCGTGGTAATTCTAGAGCTA 149

```



|       |      |                                                              |      |
|-------|------|--------------------------------------------------------------|------|
| Query | 1081 | AGGCTGAAACTTAAAGGAATTGACGGAAGGGCACCACCAGGAGTGGAGCCTGCGGCTTAA | 1140 |
|       |      |                                                              |      |
| Sbjct | 1108 | AGGCTGAAACTTAAAGGAATTGACGGAAGGGCACCACCAGGAGTGGAGCCTGCGGCTTAA | 1167 |
| Query | 1141 | TTTACTCAACACGGGGAAACTCACCAGGTCAGACACAATAAGGATTGACAGATTGAGA   | 1200 |
|       |      |                                                              |      |
| Sbjct | 1168 | TTTACTCAACACGGGGAAACTCACCAGGTCAGACACAATAAGGATTGACAGATTGAGA   | 1227 |
| Query | 1201 | GCTCTTTCTTGATTTTGTGGGTGGTGGTGCATGGCCGTTCTTAGTTGGTGGAGTGATTTG | 1260 |
|       |      |                                                              |      |
| Sbjct | 1228 | GCTCTTTCTTGATTTTGTGGGTGGTGGTGCATGGCCGTTCTTAGTTGGTGGAGTGATTTG | 1287 |
| Query | 1261 | TCTGCTTAATTGCGATAACGAACGAGACCTAACCTACTAAATAGTGCTGCTAGCTTTTG  | 1320 |
|       |      |                                                              |      |
| Sbjct | 1288 | TCTGCTTAATTGCGATAACGAACGAGACCTAACCTACTAAATAGTGCTGCTAGCTTTTG  | 1347 |
| Query | 1321 | CTGGTATAGTCACTTCTTAGAGGGACTATCGATTTCAAGTCGATGGAAGTTTGAGGCAAT | 1380 |
|       |      |                                                              |      |
| Sbjct | 1348 | CTGGTATAGTCACTTCTTAGAGGGACTATCGATTTCAAGTCGATGGAAGTTTGAGGCAAT | 1407 |
| Query | 1381 | AACAGGTCTGTGATGCCCTTAGACGTTCTGGGCCGCACGCGCTTACACTGACGGAGCCA  | 1440 |
|       |      |                                                              |      |
| Sbjct | 1408 | AACAGGTCTGTGATGCCCTTAGACGTTCTGGGCCGCACGCGCTTACACTGACGGAGCCA  | 1467 |
| Query | 1441 | ACGAGTATTAACCTTGGCCGAGAGGTCTGGGAAATCTTGTGAAACTCCGTCGTGCTGGGG | 1500 |
|       |      |                                                              |      |
| Sbjct | 1468 | GCGAGTTTTAACCTTGGCCGAGAGGTCTGGGAAATCTTGTGAAACTCCGTCGTGCTGGGG | 1527 |
| Query | 1501 | ATAGAGCATTGTAATTATTGCTCTTCAACGAGGAATTCCTAGTAAGCGCAAGTCATCAGC | 1560 |
|       |      |                                                              |      |
| Sbjct | 1528 | ATAGAGCATTGTAATTATTGCTCTTCAACGAGGAATTCCTAGTAAGCGCAAGTCATCAGC | 1587 |
| Query | 1561 | TTGCGTTGATTACGTCCCTGCCCTTTGTACACACCGCCCGTCGCTACTACCGATTGAATG | 1620 |
|       |      |                                                              |      |
| Sbjct | 1588 | TTGCGTTGATTACGTCCCTGCCCTTTGTACACACCGCCCGTCGCTACTACCGATTGAATG | 1647 |
| Query | 1621 | GCTTAGTGAGGCCTCCGGATTGGTTTAAAGAAGGGGGCAACTCCATCTTGAACCGAAAA  | 1680 |
|       |      |                                                              |      |
| Sbjct | 1648 | GCTTAGTGAGGCCTCCGGATTGGTTTAAAGAAGGGGGCAACTCCATCTTGAACCGAAAA  | 1707 |
| Query | 1681 | GCTGGTCAAACCTGGTCATTTAGAGGAAGTAAAAGTCGTAACAAGGTTTCCGTAGGTGAA | 1740 |
|       |      |                                                              |      |
| Sbjct | 1708 | GTTGGTCAAACCTGGTCATTTAGAGGAAGTAAAAGTCGTAACAAGGTTTCCGTAGGTGAA | 1767 |
| Query | 1741 | CCTGCGGAAGGATCATT                                            | 1758 |
|       |      |                                                              |      |
| Sbjct | 1768 | CCTGCGGAAGGATCATT                                            | 1785 |

>dbj|AB022440.1| Debaryomyces sp. MBIC4210 gene for 18S rRNA, partial sequence  
Length=1738

Score = 3171 bits (1717), Expect = 0.0  
Identities = 1717/1717 (100%), Gaps = 0/1717 (0%)  
Strand=Plus/Plus

|       |    |                                                              |     |
|-------|----|--------------------------------------------------------------|-----|
| Query | 3  | GCCATGCATGTCTAAGTATAAGCAATTTATACAGTGAAACTGCGAATGGCTCATTAAATC | 62  |
|       |    |                                                              |     |
| Sbjct | 22 | GCCATGCATGTCTAAGTATAAGCAATTTATACAGTGAAACTGCGAATGGCTCATTAAATC | 81  |
| Query | 63 | AGTTATCGTTTATTTGATAGTACCTTTACTACTTGGATAACCGTGGTAATTCTAGAGCTA | 122 |
|       |    |                                                              |     |
| Sbjct | 82 | AGTTATCGTTTATTTGATAGTACCTTTACTACTTGGATAACCGTGGTAATTCTAGAGCTA | 141 |



```

Query 1083 GCTGAAACTTAAAGGAATTGACGGAAGGGCACCACCAGGAGTGGAGCCTGCGGCTTAATT 1142
          |||
Sbjct 1102 GCTGAAACTTAAAGGAATTGACGGAAGGGCACCACCAGGAGTGGAGCCTGCGGCTTAATT 1161

Query 1143 TGA CTCAACACGGGGAAACTCACCAGGTCCAGACACAATAAGGATTGACAGATTGAGAGC 1202
          |||
Sbjct 1162 TGA CTCAACACGGGGAAACTCACCAGGTCCAGACACAATAAGGATTGACAGATTGAGAGC 1221

Query 1203 TCTTTCTTGATTTTGTGGGTGGTGGTGCATGGCCGTTCTTAGTTGGTGGAGTGATTTGTC 1262
          |||
Sbjct 1222 TCTTTCTTGATTTTGTGGGTGGTGGTGCATGGCCGTTCTTAGTTGGTGGAGTGATTTGTC 1281

Query 1263 TGCTTAATTGCGATAACGAACGAGACCTTAACCTACTAAATAGTGCTGCTAGCTTTTGCT 1322
          |||
Sbjct 1282 TGCTTAATTGCGATAACGAACGAGACCTTAACCTACTAAATAGTGCTGCTAGCTTTTGCT 1341

Query 1323 GGTATAGTCACTTCTTAGAGGGACTATCGATTTCAAGTCGATGGAAGTTTGAGGCAATAA 1382
          |||
Sbjct 1342 GGTATAGTCACTTCTTAGAGGGACTATCGATTTCAAGTCGATGGAAGTTTGAGGCAATAA 1401

Query 1383 CAGGTCTGTGATGCCCTTAGACGTTCTGGGCCGCACGCGCGCTACACTGACGGAGCCAAC 1442
          |||
Sbjct 1402 CAGGTCTGTGATGCCCTTAGACGTTCTGGGCCGCACGCGCGCTACACTGACGGAGCCAAC 1461

Query 1443 GAGTATTAACCTTGGCCGAGAGGTCTGGGAAATCTTGTGAAACTCCGTCGTGCTGGGGAT 1502
          |||
Sbjct 1462 GAGTATTAACCTTGGCCGAGAGGTCTGGGAAATCTTGTGAAACTCCGTCGTGCTGGGGAT 1521

Query 1503 AGAGCATTGTAATTATTGCTCTTCAACGAGGAATTCCTAGTAAGCGCAAGTCATCAGCTT 1562
          |||
Sbjct 1522 AGAGCATTGTAATTATTGCTCTTCAACGAGGAATTCCTAGTAAGCGCAAGTCATCAGCTT 1581

Query 1563 GCGTTGATTACGTCCCTGCCCTTTGTACACACCGCCCGTCGCTACTACCGATTGAATGGC 1622
          |||
Sbjct 1582 GCGTTGATTACGTCCCTGCCCTTTGTACACACCGCCCGTCGCTACTACCGATTGAATGGC 1641

Query 1623 TTAGTGAGGCCTCCGGATTGGTTTAAAGAAGGGGGCAACTCCATCTTGAACCGAAAAGC 1682
          |||
Sbjct 1642 TTAGTGAGGCCTCCGGATTGGTTTAAAGAAGGGGGCAACTCCATCTTGAACCGAAAAGC 1701

Query 1683 TGGTCAAACCTTGGTCATTTAGAGGAAGTAAAAGTCGT 1719
          |||
Sbjct 1702 TGGTCAAACCTTGGTCATTTAGAGGAAGTAAAAGTCGT 1738

```

>gb|AY518520.1| *Candida smithsonii* strain BG02-7-13-007B-1-2 18S ribosomal RNA gene, partial sequence  
Length=1754

Score = 3168 bits (1715), Expect = 0.0  
Identities = 1738/1748 (99%), Gaps = 5/1748 (0%)  
Strand=Plus/Plus

```

Query 3 GCCATGCATGTCTAAGTATAAGCAATTTATACAGTGAAACTGCGAATGGCTCATTAAATC 62
          |||
Sbjct 10 GCCATGCATGTCTAAGTATAAGCAATTTATACAGTGAAACTGCGAATGGCTCATTAAATC 69

Query 63 AGTTATCGTTTATTTGATAGTACCTTTACTACTTGGATAACCGTGGTAATTCTAGAGCTA 122
          |||
Sbjct 70 AGTTATCGTTTATTTGATAGTACCTTTACTACTTGGATAACCGTGGTAATTCTAGAGCTA 129

Query 123 ATACATGCTAAAAATCCCGACTGTTTGGGAAGGGATGTATTTATTAGATAAAAAATCAATG 182
          |||
Sbjct 130 ATACATGCTAAAAATCCCGACTGTTTGGGAAGGGATGTATTTATTAGATAAAAAATCAATG 189

```



```

Query 1141 TTTGACTCAACACGGGGAAACTCACCAGGTCAGACACAATAAGGATTGACAGATTGAGA 1200
          |||
Sbjct 1147 TTTGACTCAACACGGGGAAACTCACCAGGTCAGACACAATAAGGATTGACAGATTGAGA 1206

Query 1201 GCTCTTTCTTGATTTTGTGGGTGGTGGTGCATGGCCGTTCTTAGTTGGTGGAGTGATTTG 1260
          |||
Sbjct 1207 GCTCTTTCTTGATTTTGTGGGTGGTGGTGCATGGCCGTTCTTAGTTGGTGGAGTGATTTG 1266

Query 1261 TCTGCTTAATTGCGATAACGAACGAGACCTTAACCTACTAAATAGTGCTGCTAGCTTTTG 1320
          |||
Sbjct 1267 TCTGCTTAATTGCGATAACGAACGAGACCTTAACCTACTAAATAGTGCTGCTAGCTTTTG 1326

Query 1321 CTGGTATAGTCACTTCTTAGAGGGACTATCGATTTCAAGTCGATGGAAGTTTGAGGCAAT 1380
          |||
Sbjct 1327 CTGGTATAGTCACTTCTTAGAGGGACTATCGATTTCAAGTCGATGGAAGTTTGAGGCAAT 1386

Query 1381 AACAGGTCTGTGATGCCCTTAGACGTTCTGGGCCGCACGCGCTACACTGACGGAGCCA 1440
          |||
Sbjct 1387 AACAGGTCTGTGATGCCCTTAGACGTTCTGGGCCGCACGCGCTACACTGACGGAGCCA 1446

Query 1441 ACGAGTATTAACCTTGGCCGAGAGGTCTGGGAAATCTTGTGAAACTCCGTCGTGCTGGGG 1500
          |||
Sbjct 1447 GCGAGTATTAACCTTGGCCGAGAGGTCTGGGAAATCTTGTGAAACTCCGTCGTGCTGGGG 1506

Query 1501 ATAGAGCATTGTAATTATTGCTCTTCAACGAGGAATTCCTAGTAAGCGCAAGTCATCAGC 1560
          |||
Sbjct 1507 ATAGAGCATTGTAATTATTGCTCTTCAACGAGGAATTCCTAGTAAGCGCAAGTCATCAGC 1566

Query 1561 TTGCGTTGATTACGTCCCTGCCCTTTGTACACACCGCCCGTCGCTACTACCGATTGAATG 1620
          |||
Sbjct 1567 TTGCGTTGATTACGTCCCTGCCCTTTGTACACACCGCCCGTCGCTACTACCGATTGAATG 1626

Query 1621 GCTTAGTGAGGCCTCCGGATTGGTTTAAAGAAGGGGGCAACTCCATCTTGAACCGAAAA 1680
          |||
Sbjct 1627 GCTTAGTGAGGCCTCCGGATTGGTTTAAAGAAGGGGGCAACTCCATCTTGAACCGAAAA 1686

Query 1681 GCTGGTCAAACCTGGTCATTTAGAGGAAGTAAAAGTCGTAACAAGGTTTCCGTAGGTGAA 1740
          |||
Sbjct 1687 GCTGGTCAAACCTGGTCATTTAGAGGAAGTAAAAGTCGTAACAAGGTTTCCGTAGGTGAA 1746

Query 1741 CCTGCGGA 1748
          |||
Sbjct 1747 CCTGCGGA 1754

```

>gb|AY242150.1| *Candida* sp. BG99-8-11-1-4-1 18S ribosomal RNA gene, partial sequence  
Length=1731

Score = 3164 bits (1713), Expect = 0.0  
Identities = 1720/1723 (99%), Gaps = 2/1723 (0%)  
Strand=Plus/Plus

```

Query 3 GCCATGCATGTCTAAGTATAAGCAATTTATACAGTGAAACTGCGAATGGCTCATTAAATC 62
          |||
Sbjct 10 GCCATGCATGTCTAAGTATAAGCAATTTATACAGTGAAACTGCGAATGGCTCATTAAATC 69

Query 63 AGTTATCGTTTATTTGATAGTACCTTTACTACTTGGATAACCGTGGTAATTCTAGAGCTA 122
          |||
Sbjct 70 AGTTATCGTTTATTTGATAGTACCTTTACTACTTGGATAACCGTGGTAATTCTAGAGCTA 129

Query 123 ATACATGCTAAAAATCCCGACTGTTTGGGAAGGGATGTATTTATTAGATAAAAAATCAATG 182
          |||

```



|       |      |                                                               |      |
|-------|------|---------------------------------------------------------------|------|
| Sbjct | 130  | ATACATGCTAAAAATCCCGACTGTTTGGGAAGGGATGTATTTATTAGATAAAAAATCAATG | 189  |
| Query | 183  | CTTTTCGGAGCTCTTTGATGATTATAATAACTTTTCGAATCGCATGGCCTTGTGCTGGC   | 242  |
| Sbjct | 190  | CTTTTCGGAGCTCTTTGATGATTATAATAACTTTTCGAATCGCATGGCCTTGTGCTGGC   | 249  |
| Query | 243  | GATGGTTCATTCAAATTTCTGCCCTATCAACTTTTCGATGGTAGGATAGTGGCCTACCATG | 302  |
| Sbjct | 250  | GATGGTTCATTCAAATTTCTGCCCTATCAACTTTTCGATGGTAGGATAGTGGCCTACCATG | 309  |
| Query | 303  | GTTTCAACGGGTAACGGGGAATAAGGGTTCGATTCCGGAGAGGGAGCCTGAGAAACGGCT  | 362  |
| Sbjct | 310  | GTTTCAACGGGTAACGGGGAATAAGGGTTCGATTCCGGAGAGGGAGCCTGAGAAACGGCT  | 369  |
| Query | 363  | ACCACATCCAAGGAAGGCAGCAGGCGCGCAAATTACCCAATCCCGACACGGGGAGGTAGT  | 422  |
| Sbjct | 370  | ACCACATCCAAGGAAGGCAGCAGGCGCGCAAATTACCCAATCCCGACACGGGGAGGTAGT  | 429  |
| Query | 423  | GACAATAAATAACGATACAGGGCCCTTTCGGGTCTTGTAAATTGGAATGAGTACAATGTAA | 482  |
| Sbjct | 430  | GACAATAAATAACGATACAGGGCCCTTTCGGGTCTTGTAAATTGGAATGAGTACAATGTAA | 489  |
| Query | 483  | ATACCTTAACGAGGAACAATTGGAGGGCAAGTCTGGTGCCAGCAGCCGCGGTAATTCCAG  | 542  |
| Sbjct | 490  | ATACCTTAACGAGGAACAATTGGAGGGCAAGTCTGGTGCCAGCAGCCGCGGTAATTCCAG  | 549  |
| Query | 543  | CTCCAATAGCGTATATTAAGTTGTTGCAGTTAAAAAGCTCGTAGTTGAACCTTGGGCTT   | 602  |
| Sbjct | 550  | CTCCAATAGCGTATATTAAGTTGTTGCAGTTAAAAAGCTCGTAGTTGAACCTTGGGCTT   | 609  |
| Query | 603  | GGTTGGCCGGTCCGCCTTTTTGGCGAGTACTGGACCCAACCGAGCCTTTCCTTCTGGCTA  | 662  |
| Sbjct | 610  | GGTTGGCCGGTCCGCCTTTTTGGCGAGTACTGGACCCAACCGAGCCTTTCCTTCTGGCTA  | 669  |
| Query | 663  | ACCTTTCGCCCTTGTGGTGTGGCGAACCAGGACTTTTACTTTGAAAAATTAGAGTGT     | 722  |
| Sbjct | 670  | ACCTTTCGCCCTTGTGGTGTGGCGAACCAGGACTTTTACTTTGAAAAATTAGAGTGT     | 729  |
| Query | 723  | TCAAAGCAGGCCTTGTCTCGAATATATTAGCATGGAATAATAGAATAGGACGTTATGGTT  | 782  |
| Sbjct | 730  | TCAAAGCAGGCCTTGTCTCGAATATATTAGCATGGAATAATAGAATAGGACGTTATGGTT  | 789  |
| Query | 783  | CTATTTTGTGGTTTCTAGGACCATCGTAATGATTAATAGGGACGGTCGGGGGCATCAGT   | 842  |
| Sbjct | 790  | CTATTTTGTGGTTTCTAGGACCATCGTAATGATTAATAGGGACGGTCGGGGGCATCAGT   | 849  |
| Query | 843  | ATTCAGTTGTCAGAGGTGAAATTCTTGGA-TTACCTGAAGACTAACTACTGCGAAAGCAT  | 901  |
| Sbjct | 850  | ATTCAGTTGTCAGAGGTGAAATTCTTGGA-TTACCTGAAGACTAACTACTGCGAAAGCAT  | 908  |
| Query | 902  | TTGCCAAGGACGTTTTTATTAATCAAGAACGAAAGTTAGGGGATCGAAGATGATCAGATA  | 961  |
| Sbjct | 909  | TTGCCAAGGACGTTTTTATTAATCAAGAACGAAAGTTAGGGGATCGAAGATGATCAGATA  | 968  |
| Query | 962  | CCGTCGTAGTCTTAACCATAAACTATGCCGACTAGGGATCGGGTGTGTTCTTTTTTTGA   | 1021 |
| Sbjct | 969  | CCGTCGTAGTCTTAACCATAAACTATGCCGACTAGGGATCGGGTGTGTTCTTTTTTTGA   | 1028 |
| Query | 1022 | CGCACTCGGCACCTTACGAGAAATCAAAGTCTTTGGGTTCTGGGGGAGTATGGTCGCAA   | 1081 |
| Sbjct | 1029 | CGCACTCGGCACCTTACGAGAAATCAAAGTCTTTGGGTTCTGGGGGAGTATGGTCGCAA   | 1088 |
| Query | 1082 | GGCTGAAACTTAAAGGAATTGACGGAAGGGACCACCAGGAGTGGAGCCTGCGGCTTAAT   | 1141 |



|       |      |                                                                    |      |
|-------|------|--------------------------------------------------------------------|------|
| Sbjct | 190  | <br>CTCTTT--GAGCTCTTTGATGATTCAATAAATCTTTTCGAATCGCATGGCCTTGTGCTGG   | 247  |
| Query | 242  | CGATGGTTCAATTCAAATTTCTGCCCTATCAACTTTTCGATGGTAGGATAGTGGCCTACCAT     | 301  |
| Sbjct | 248  | <br>CGATGGTTCAATTCAAATTTCTGCCCTATCAACTTTTCGATGGTAGGATAGTGGCCTACCAT | 307  |
| Query | 302  | GGTTTCAACGGGTAACGGGGAATAAGGGTTCGATTCCGGAGAGGGAGCCTGAGAAACGGC       | 361  |
| Sbjct | 308  | <br>GGTTTCAACGGGTAACGGGGAATAAGGGTTCGATTCCGGAGAGGGAGCCTGAGAAACGGC   | 367  |
| Query | 362  | TACCACATCCAAGGAAGGCAGCAGGCGCGCAAATTACCCAATCCCGACACGGGGAGGTAG       | 421  |
| Sbjct | 368  | <br>TACCACATCCAAGGAAGGCAGCAGGCGCGCAAATTACCCAATCCCGACACGGGGAGGTAG   | 427  |
| Query | 422  | TGACAATAAATAACGATACAGGGCCCTTTCGGGTCTTGTAATTGGAATGAGTACAATGTA       | 481  |
| Sbjct | 428  | <br>TGACAATACATAACGATACAGGGCCCTTTCGGGTCTTGTAATTGGAATGAGTACAATGTA   | 487  |
| Query | 482  | AATACCTTAACGAGGAACAATTGGAGGGCAAGTCTGGTGCCAGCAGCCGCGGTAATTCCA       | 541  |
| Sbjct | 488  | <br>AATACCTTAACGAGGAACAATTGGAGGGCAAGTCTGGTGCCAGCAGCCGCGGTAATTCCA   | 547  |
| Query | 542  | GCTCCAATAGCGTATATTAAGTTGTTGCAGTTAAAAAGCTCGTAGTTGAACCTTGGGCT        | 601  |
| Sbjct | 548  | <br>GCTCCAATAGCGTATATTAAGTTGTTGCAGTTAAAAAGCTCGTAGTTGAACCTTGGGCT    | 607  |
| Query | 602  | TGGTTGGCCGGTCCGCCTTTTTGGCGAGTACTGGACCCAACCGAGCCTTTCCTTCTGGCT       | 661  |
| Sbjct | 608  | <br>TGGTTGGCCGGTCCGCCTTTTTGGCGAGTACTGGACCCAACCGAGCCTTTCCTTCTGGCT   | 667  |
| Query | 662  | AACCTTTCGCCCTTGTGGTGTGGCGAACCAGGACTTTTACTTTGAAAAATTAGAGTG          | 721  |
| Sbjct | 668  | <br>AACCATTCGCCCTTGTGGTGTGGCGAACCAGGACTTTTACTTTGAAAAATTAGAGTG      | 727  |
| Query | 722  | TTCAAAGCAGGCCTTTGCTCGAATATATTAGCATGGAATAATAGAATAGGACGTTATGGT       | 781  |
| Sbjct | 728  | <br>TTCAAAGCAGGCCTTTGCTCGAATATATTAGCATGGAATAATAGAATAGGACGTTATGGT   | 787  |
| Query | 782  | TCTATTTTGTGGTTTCTAGGACCATCGTAATGATTAATAGGGACGGTCGGGGGCATCAG        | 841  |
| Sbjct | 788  | <br>TCTATTTTGTGGTTTCTAGGACCATCGTAATGATTAATAGGGACGGTCGGGGGCATCAG    | 847  |
| Query | 842  | TATTCAGTTGTCAGAGGTGAAATTCTTGGA--TTACCTGAAGACTAACTACTGCGAAAGCA      | 900  |
| Sbjct | 848  | <br>TATTCAGTTGTCAGAGGTGAAATTCTTAGATTTA-CTGAAGACTAACTACTGCGAAAGCA   | 906  |
| Query | 901  | TTTGCCAAGGACGTTTTTCATTAATCAAGAACGAAAGTTAGGGGATCGAAGATGATCAGAT      | 960  |
| Sbjct | 907  | <br>TTTGCCAAGGACGTTTTTCATTAATCAAGAACGAAAGTTAGGGGATCGAAGATGATCAGAT  | 966  |
| Query | 961  | ACCGTCGTAGTCTTAACCATAAACTATGCCGACTAGGGATCGGGTGTGTTCTtttttttG       | 1020 |
| Sbjct | 967  | <br>ACCGTCGTAGTCTTAACCATAAACTATGCCGACTAGGGATCGGGTGTGTTCTTTTTTTG    | 1026 |
| Query | 1021 | ACGCACTCGGCACCTTACGAGAAATCAAAGTCTTTGGGTTCTGGGGGAGTATGGTCGCA        | 1080 |
| Sbjct | 1027 | <br>ACGCACTCGGCACCTTACGAGAAATCAAAGTCTTTGGGTTCTGGGGGAGTATGGTCGCA    | 1086 |
| Query | 1081 | AGGCTGAAACTTAAAGGAATTGACGGAAGGGCACCACCAGGAGTGGAGCCTGCGGCTTAA       | 1140 |
| Sbjct | 1087 | <br>AGGCTGAAACTTAAAGGAATTGACGGAAGGGCACCACCAGGAGTGGAGCCTGCGGCTTAA   | 1146 |
| Query | 1141 | TTTGACTCAACACGGGGAAACTCACCAGTCCAGACACAATAAGGATTGACAGATTGAGA        | 1200 |

|       |      |                                                                   |      |
|-------|------|-------------------------------------------------------------------|------|
| Sbjct | 1147 | <br>TTTACTCAACACGGGAAACTCACCAGGTCAGACACAATAAGGATTGACAGATTGAGA     | 1206 |
| Query | 1201 | GCTCTTTCTTGATTTTGTGGGTGGTGGTGCATGGCCGTTCTTAGTTGGTGGAGTGATTTG      | 1260 |
| Sbjct | 1207 | <br>GCTCTTTCTTGATTTTGTGGGTGGTGGTGCATGGCCGTTCTTAGTTGGTGGAGTGATTTG  | 1266 |
| Query | 1261 | TCTGCTTAATTGCGATAACGAACGAGACCTTAACCTACTAAATAGTGCTGCTAGCTTTTG      | 1320 |
| Sbjct | 1267 | <br>TCTGCTTAATTGCGATAACGAACGAGACCTTAACCTACTAAATAGTGCTGCTAGCTTTTG  | 1326 |
| Query | 1321 | CTGGTATAGTCACTTCTTAGAGGGACTATCGATTTCAAGTCGATGGAAGTTTGAGGCAAT      | 1380 |
| Sbjct | 1327 | <br>CTGGTATAGTCACTTCTTAGAGGGACTATCGATTTCAAGTCGATGGAAGTTTGAGGCAAT  | 1386 |
| Query | 1381 | AACAGGTCTGTGATGCCCTTAGACGTTCTGGGCCGCACGCGCGCTACACTGACGGAGCCA      | 1440 |
| Sbjct | 1387 | <br>AACAGGTCTGTGATGCCCTTAGACGTTCTGGGCCGCACGCGCGCTACACTGACGGAGCCA  | 1446 |
| Query | 1441 | ACGAGTATTAACCTTGGCCGAGAGGTCTGGGAAATCTTGTGAAACTCCGTCGTGCTGGGG      | 1500 |
| Sbjct | 1447 | <br>GCGAGTATTAACCTTGGCCGAGAGGTCTGGGAAATCTTGTGAAACTCCGTCGTGCTGGGG  | 1506 |
| Query | 1501 | ATAGAGCATTGTAATTATTGCTCTTCAACGAGGAATTCCTAGTAAGCGCAAGTCATCAGC      | 1560 |
| Sbjct | 1507 | <br>ATAGAGCATTGTAATTATTGCTCTTCAACGAGGAATTCCTAGTAAGCGCAAGTCATCAGC  | 1566 |
| Query | 1561 | TTGCGTTGATTACGTCCCTGCCCTTTGTACACACCGCCCGTCGCTACTACCGATTGAATG      | 1620 |
| Sbjct | 1567 | <br>TTGCGTTGATTACGTCCCTGCCCTTTGTACACACCGCCCGTCGCTACTACCGATTGAATG  | 1626 |
| Query | 1621 | GCTTAGTGAGGCCTCCGGATTGGTTTAAAGAAGGGGGCAACTCCATCTTGAACCGAAAA       | 1680 |
| Sbjct | 1627 | <br>GCTTAGTGAGGCCTCCGGATTGGTTTAAAGAAGGGGGCAACTCCATCTTGAACCGAAAA   | 1686 |
| Query | 1681 | GCTGGTCAAACCTTGGTCATTTAGAGGAAGTAAAAGTCGTAACAAGGTTTCCGTAGGTGAA     | 1740 |
| Sbjct | 1687 | <br>GCTGGTCAAACCTTGGTCATTTAGAGGAAGTAAAAGTCGTAACAAGGTTTCCGTAGGTGAA | 1746 |
| Query | 1741 | CCTGC 1745                                                        |      |
| Sbjct | 1747 | <br>CCTGC 1751                                                    |      |

>dbj|AB013546.1| Candida laureliae 18S rRNA gene, strain JCM 8917, partial sequence  
Length=1782

Score = 3162 bits (1712), Expect = 0.0  
Identities = 1744/1758 (99%), Gaps = 7/1758 (0%)  
Strand=Plus/Plus

|       |     |                                                                  |     |
|-------|-----|------------------------------------------------------------------|-----|
| Query | 3   | GCCATGCATGTCTAAGTATAAGCAATTTATACAGTGAAACTGCGAATGGCTCATTAAATC     | 62  |
| Sbjct | 30  | <br>GCCATGCATGTCTAAGTATAAGCAATTTATACAGTGAAACTGCGAATGGCTCATTAAATC | 89  |
| Query | 63  | AGTTATCGTTTATTTGATAGTACCTTTACTACTTGGATAACCGTGGTAATTCTAGAGCTA     | 122 |
| Sbjct | 90  | <br>AGTTATCGTTTATTTGATAGTACCTTTACTACTTGGATAACCGTGGTAATTCTAGAGCTA | 149 |
| Query | 123 | ATACATGCTAAAAATCCCGACTGTTTGAAGGGATGTATTTATTAGATAAAAAATCAATG      | 182 |
| Sbjct | 150 | <br>ATACATGCTAAAAATCCCGACT-TCTGGAAGGGATGTATTTATTAGATAAAAAATCAATG | 208 |
| Query | 183 | CTTTTCGGAGCTCTTTGATGATTCATAATAACTTTTCGAATCGCATGGCCTTGTGCTGGC     | 242 |

|       |      |                                                                    |      |
|-------|------|--------------------------------------------------------------------|------|
| Sbjct | 209  | <br>CTTTTCGGAGCTCTTTGATGATTATAAATACTTTTCGAATCGCATGGCCTTGTGCTGGC    | 268  |
| Query | 243  | GATGGTTCATTCAAATTTCTGCCCTATCAACTTTTCGATGGTAGGATAGTGGCCTACCATG      | 302  |
| Sbjct | 269  | <br>GATGGTTCATTCAAATTTCTGCCCTATCAACTTTTCGATGGTAGGATAGTGGCCTACCATG  | 328  |
| Query | 303  | GTTTCAACGGGTAACGGGGAATAAGGGTTCGATTCCGGAGAGGGAGCCTGAGAAACGGCT       | 362  |
| Sbjct | 329  | <br>GTTTCAACGGGTAACGGGGAATAAGGGTTCGATTCCGGAGAGGGAGCCTGAGAAACGGCT   | 388  |
| Query | 363  | ACCACATCCAAGGAAGGCAGCAGGCGCGCAAATTACCCAATCCCGACACGGGGAGGTAGT       | 422  |
| Sbjct | 389  | <br>ACCACATCCAAGGAAGGCAGCAGGCGCGCAAATTACCCAATCCCGACACGGGGAGGTAGT   | 448  |
| Query | 423  | GACAATAAATAACGATACAGGGCCCTTTTCGGGTCTTGTAAATTGGAATGAGTACAATGTAA     | 482  |
| Sbjct | 449  | <br>GACAATAAATAACGATACAGGGCCCTTTTCGGGTCTTGTAAATTGGAATGAGTACAATGTAA | 508  |
| Query | 483  | ATACCTTAACGAGGAACAATTGGAGGGCAAGTCTGGTGCCAGCAGCCGCGGTAATTCCAG       | 542  |
| Sbjct | 509  | <br>ATACCTTAACGAGGAACAATTGGAGGGCAAGTCTGGTGCCAGCAGCCGCGGTAATTCCAG   | 568  |
| Query | 543  | CTCCAATAGCGTATATTAAAGTTGTTGCAGTTAAAAAGCTCGTAGTTGAACCTTGGGCTT       | 602  |
| Sbjct | 569  | <br>CTCCAATAGCGTATATTAAAGTTGTTGCAGTTAAAAAGCTCGTAGTTGAACCTTGGGCTT   | 628  |
| Query | 603  | GGTTGGCCGGTCCGCCTTTTTGGCGAGTACTGGACCCAACCGAGCCTTTCCTTCTGGCTA       | 662  |
| Sbjct | 629  | <br>GGTTGGCCGGTCCG-C'TTTATGGCGAGTACTGGACCCAACCGAGCCTTTCCTTCTGGCTA  | 687  |
| Query | 663  | ACCTTTTCGCCCTTGTGGTGTGGCGAACCAGGACTTTTACTTTGAAAAAATTAGAGTGT        | 722  |
| Sbjct | 688  | <br>ACCTTTTCGCCCTTGTGGTGTGGCGAACCAGGACTTTTACTTTGAAAAAATTAGAGTGT    | 747  |
| Query | 723  | TCAAAGCAGGCCTTTGCTCGAATATATTAGCATGGAATAATAGAATAGGACGTTATGGTT       | 782  |
| Sbjct | 748  | <br>TCAAAGCAGGCCTTTGCTCGAATATATTAGCATGGAATAATAGAATAGGACGTTATGGTT   | 807  |
| Query | 783  | CTATTTTGTGGTTTCTAGGACCATCGTAATGATTAATAGGGACGGTCGGGGGCATCAGT        | 842  |
| Sbjct | 808  | <br>CTATTTTGTGGTTTCTAGGACCATCGTAATGATTAATAGGGACGGTCGGGGGCATCAGT    | 867  |
| Query | 843  | ATTCAGTTGTCAGAGGTGAAATTCTTGGA-TTACCTGAAGACTAACTACTGCGAAAGCAT       | 901  |
| Sbjct | 868  | <br>ATTCAGTTGTCAGAGGTGAAATTCTTGGA-TTACCTGAAGACTAACTACTGCGAAAGCAT   | 926  |
| Query | 902  | TTGCCAAGGACGTTTTTATTAATCAAGAACGAAAGTTAGGGGATCGAAGATGATCAGATA       | 961  |
| Sbjct | 927  | <br>TTGCCAAGGACGTTTTTATTAATCAAGAACGAAAGTTAGGGGATCGAAGATGATCAGATA   | 986  |
| Query | 962  | CCGTCGTAGTCTTAACCATAAACTATGCCGACTAGGGATCGGGTGTGTTCTtttttttGA       | 1021 |
| Sbjct | 987  | <br>CCGTCGTAGTCTTAACCATAAACTATGCCGACTAGGGATCGGGTGTGTTCTTTTTTTTGA   | 1046 |
| Query | 1022 | CGCACTCGGCACCTTACGAGAAATCAAAGTCTTTGGGTTCTGGGGGGAGTATGGTCGCAA       | 1081 |
| Sbjct | 1047 | <br>CGCACTCGGCACCTTACGAGAAATCAAAGTCTTTGGGTTCTGGGGGGAGTATGGTCGCAA   | 1106 |
| Query | 1082 | GGCTGAAACTTAAAGGAATTGACGGAAGGGCACCACCAGGAGTGGAGCCTGCGGCTTAAT       | 1141 |
| Sbjct | 1107 | <br>GGCTGAAACTTAAAGGAATTGACGGAAGGGCACCACCAGGAGTGGAGCCTGCGGCTTAAT   | 1166 |
| Query | 1142 | TTGACTCAACACGGGGAAACTCACCAGGTCCAGACACAATAAGGATTGACAGATTGAGAG       | 1201 |

|       |      |                                                                   |      |
|-------|------|-------------------------------------------------------------------|------|
| Sbjct | 1167 | <br>TTGACTCAACACGGGGAAACTCACCAGGTCCAGACACAATAAGGATTGACAGATTGAGAG  | 1226 |
| Query | 1202 | CTCTTTCTTGATTTTGTGGGTGGTGGTGCATGGCCGTTCTTAGTTGGTGGAGTGATTTGT      | 1261 |
| Sbjct | 1227 | <br>CTCTTTCTTGATTTTGTGGGTGGTGGTGCATGGCCGTTCTTAGTTGGTGGAGTGATTTGT  | 1286 |
| Query | 1262 | CTGCTTAATTGCGATAACGAACGAGACCTTAACCTACTAAATAGTGCTGCTAGCTTTTGC      | 1321 |
| Sbjct | 1287 | <br>CTGCTTAATTGCGATAACGAACGAGACCTTAACCTACTAAATAGTGCTGCTAGCTTTTGC  | 1346 |
| Query | 1322 | TGGTATAGTCACTTCTTAGAGGGACTATCGATTTCAAGTCGATGGAAGTTTGAGGCAATA      | 1381 |
| Sbjct | 1347 | <br>TGGTATAGTCACTTCTTAGAGGGACTATCGATTTCAAGTCGATGGAAGTTTGAGGCAATA  | 1406 |
| Query | 1382 | ACAGGTCTGTGATGCCCTTAGACGTTCTGGGCCGCACGCGCGCTACACTGACGGAGCCAA      | 1441 |
| Sbjct | 1407 | <br>ACAGGTCTGTGATGCCCTTAGACGTTCTGGGCCGCACGCGCGCTACACTGACGGAGCCAG  | 1466 |
| Query | 1442 | CGAGTAT-TAACCTTGGCCGAGAGGTCTGGGAAATCTTGTGAAACTCCGTCGTGCTGGGG      | 1500 |
| Sbjct | 1467 | <br>CGAGT-TCTAACCTTGGCCGAGAGGTCTGGGTAATCTTGTGAAACTCCGTCGTGCTGGGG  | 1525 |
| Query | 1501 | ATAGAGCATTGTAATTATTGCTCTTCAACGAGGAATTCCTAGTAAGCGCAAGTCATCAGC      | 1560 |
| Sbjct | 1526 | <br>ATAGAGCATTGTAATTATTGCTCTTCAACGAGGAATTCCTAGTAAGCGCAAGTCATCAGC  | 1585 |
| Query | 1561 | TTGCGTTGATTACGTCCCTGCCCTTTGTACACACCGCCCGTCGCTACTACCGATTGAATG      | 1620 |
| Sbjct | 1586 | <br>TTGCGTTGATTACGTCCCTGCCCTTTGTACACACCGCCCGTCGCTACTACCGATTGAATG  | 1645 |
| Query | 1621 | GCTTAGTGAGGCCTCCGGATTGGTTTAAAGAAGGGGGCAACTCCATCTTGGAACCGAAAA      | 1680 |
| Sbjct | 1646 | <br>GCTTAGTGAGGCCTCCGGATTGGTTTAAAGAAGGGGGCAACTCCATCTTGGAACCGAAAA  | 1705 |
| Query | 1681 | GCTGGTCAAACCTTGGTCATTTAGAGGAAGTAAAAGTCGTAACAAGGTTTCCGTAGGTGAA     | 1740 |
| Sbjct | 1706 | <br>GCTAGTCAAACCTTGGTCATTTAGAGGAAGTAAAAGTCGTAACAAGGTTTCCGTAG-TGAA | 1764 |
| Query | 1741 | CCTGCGGAAGGATCATT                                                 | 1758 |
| Sbjct | 1765 | <br>CCTGCGGAAGGATCATT                                             | 1782 |

>emb|X83821.1| Debaryomyces udonii 18S rRNA gene (NCYC 2394)  
Length=1804

Score = 3162 bits (1712), Expect = 0.0  
Identities = 1742/1761 (98%), Gaps = 5/1761 (0%)  
Strand=Plus/Plus

|       |     |                                                                  |     |
|-------|-----|------------------------------------------------------------------|-----|
| Query | 3   | GCCATGCATGTCTAAGTATAAGCAATTTATACAGTGAAACTGCGAATGGCTCATTAAATC     | 62  |
| Sbjct | 46  | <br>GCCATGCATGTCTAAGTATAAGCNNTNNNTACAGTGANNCTGCGNATGGCTCATTAAATC | 105 |
| Query | 63  | AGTTATCGTTTATTTGATAGTACCTTTACTACTTGGATAACCGTGGTAATTCTAGAGCTA     | 122 |
| Sbjct | 106 | <br>AGTTATCGTTTATTTGATAGTACCTTTACTACTTGGATAACCGTGGTAATTCTAGAGCTA | 165 |
| Query | 123 | ATACATGCTAAAAATCCCGACTGTTTGAAGGGATGTATTTATTAGATAAAAAATCAATG      | 182 |
| Sbjct | 166 | <br>ATACATGCTAAAAATCCCGACTGTTTGAAGGGATGTATTTATTAGATAAAAAATCAATG  | 225 |
| Query | 183 | CTTTTCGGAGCTCTTTGATGATTCATAATAACTTTTCGAATCGCATGGCCTTGTGCTGGC     | 242 |

|       |      |                                                                    |      |
|-------|------|--------------------------------------------------------------------|------|
| Sbjct | 226  | <br>CTCTTCGGAGCTCTTTGATGATTATAAATACTTTTCGAATCGCATGGCCTTGTGCTGGC    | 285  |
| Query | 243  | GATGGTTCATTCAAATTTCTGCCCTATCAACTTTTCGATGGTAGGATAGTGGCCTACCATG      | 302  |
| Sbjct | 286  | <br>GATGGTTCATTCAAATTTCTGCCCTATCAACTTTTCGATGGTAGGATAGTGGCCTACCATG  | 345  |
| Query | 303  | GTTTCAACGGGTAACGGGGAATAAGGGTTCGATTCCGGAGAGGGAGCCTGAGAAACGGCT       | 362  |
| Sbjct | 346  | <br>GTTTCAACGGGTAACGGGGAATAAGGGTTCGATTCCGGAGAGGGAGCCTGAGAAACGGCT   | 405  |
| Query | 363  | ACCACATCCAAGGAAGGCAGCAGGCGCGCAAATTACCCAATCCCGACACGGGGAGGTAGT       | 422  |
| Sbjct | 406  | <br>ACCACATCCAAGGAAGGCAGCAGGCGCGCAAATTACCCAATCCCGACACGGGGAGGTAGT   | 465  |
| Query | 423  | GACAATAAATAACGATACAGGGCCCTTTTCGGGTCTTGTAAATTGGAATGAGTACAATGTAA     | 482  |
| Sbjct | 466  | <br>GACAATAAATAACGATACAGGG-CCTTTTCGGGTCTTGTAAATTGGAATGAGTACAATGTAA | 524  |
| Query | 483  | ATACCTTAACGAGGAACAATTGGAGGGCAAGTCTGGTGCCAGCAGCCGCGGTAATTCCAG       | 542  |
| Sbjct | 525  | <br>ATACCTTAACGAGGAACAATTGGAGGGCAAGTCTGGTGCCAGCAGCCGCGGTAATTCCAG   | 584  |
| Query | 543  | CTCCAATAGCGTATATTAAGTTGTTGCAGTTAAAAAGCTCGTAGTTGAACCTTGGGCTT        | 602  |
| Sbjct | 585  | <br>CTCCAATAGCGTATATTAAGTTGTTGCAGTTAAAAAGCTCGNAGTTGAACCTTGGGTTT    | 644  |
| Query | 603  | GGTTGGCCGGTCCGCCTTTTTGGCGAGTACTGGACCCAACCGAGCCTTTCCTTCTGGCTA       | 662  |
| Sbjct | 645  | <br>GGTTGGCCGGTCCGCCTTTTTGGCGAGTACTGGACCCAACCGAGCCTTTCCTTCTGGCTA   | 704  |
| Query | 663  | ACCTTTCGCCCTTGTGGTGTGGCGAACCAGGACTTTTACTTTGAAAAATTAGAGTGT          | 722  |
| Sbjct | 705  | <br>ACCTTTCGCCCTTGTGGTGTGGCGAACCAGGACTTTTACTTTGAAAAATTAGAGTGT      | 764  |
| Query | 723  | TCAAAGCAGGCCTTTGCTCGAATATATTAGCATGGAATAATAGAATAGGACGTTATGGTT       | 782  |
| Sbjct | 765  | <br>TCAAAGCAGGCCTTTGCTCGAATATATTAGCATGGAATAATAGAATAGGACGTTATGGTT   | 824  |
| Query | 783  | CTATTTTGTGGTTTCTAGGACCATCGTAATGATTAATAGGGACGGTCGGGGGCATCAGT        | 842  |
| Sbjct | 825  | <br>CTATTTTGTGGTTTCTAGGNNCATCGTAATGATTAATAGGGACGGTCGGGGGCATCAGT    | 884  |
| Query | 843  | ATTCAGTTGTCAGAGGTGAAATTCTTGGA-TTACCTGAAGACTAACTACTGCGAAAGCAT       | 901  |
| Sbjct | 885  | <br>ATTCAGTTGTCAGAGGTGAAATTCTTGGA-TTACCTGAAGACTAACTACTGCGAAAGCAT   | 943  |
| Query | 902  | TTGCCAAGGACGTTTTTATTAATCAAGAACGAAAGTTAGGGGATCGAAGATGATCAGATA       | 961  |
| Sbjct | 944  | <br>TTGCCAAGGACGTTTTTATTAATCAAGAACGAAAGTTAGGGGATCGAAGATGATCAGATA   | 1003 |
| Query | 962  | CCGTCGTAGTCTTAACCATAAACTATGCCGACTAGGGATCGGGTGTGTTCTttttttGA        | 1021 |
| Sbjct | 1004 | <br>CCGTCGTAGTCTTAACCATAAACTATGCCGACTAGGGATCGGGTGTGTTCTTTTTTTGA    | 1063 |
| Query | 1022 | CGCACTCGGCACCTTACGAGAAATCAAAGTCTTTGGGTTCTGGGGGAGTATGGTCGCAA        | 1081 |
| Sbjct | 1064 | <br>CGCACTCGGCACCTTACGAGAAATCAAAGTCTTTGGGTTCTGGGGGAGTATGGTCGCAA    | 1123 |
| Query | 1082 | GGCTGAAACTTAAAGGAATTGACGGAAGGGCACCACCAGGAGTGGAGCCTGCGGCTTAAT       | 1141 |
| Sbjct | 1124 | <br>GGCTGAAACTTAAAGGAATTGACGGAAGGGCACCACCAGGAGTGGAGCCTGCGGCTTAAT   | 1183 |
| Query | 1142 | TTGACTCAACACGGGGAAACTCACCAGGTCCAGACACAATAAGGATTGACAGATTGAGAG       | 1201 |

|       |      |                                                                   |      |
|-------|------|-------------------------------------------------------------------|------|
| Sbjct | 1184 | <br>TTGACTCAACACGGGGAAACTCACCAGGTCCAGACACAATAAGGATTGACAGATTGAGAG  | 1243 |
| Query | 1202 | CTCTTTCTTGATTTTGTGGGT-GGTGGTGCATGGCCGTTCTTAGTTGGTGGAGTGATTTG      | 1260 |
| Sbjct | 1244 | <br>CTCTTTCTTGATTTTGTGGGTGCGTGGTGCATGGCCGTTCTTAGTTGGTGGAGTGATTTG  | 1303 |
| Query | 1261 | TCTGCTTAATTGCGATAACGAACGAGACCTTAACCTACTAAATAGTGCTGCTAGCTTTTG      | 1320 |
| Sbjct | 1304 | <br>TCTGCTTAATTGCGATAACGAACGAGACCTTAACCTACTAAATAGTGCTGCTAGCTTTTG  | 1363 |
| Query | 1321 | CTGGTATAGTCACTTCTTAGAGGGACTATCGATTTCAAGTCGATGGAAGTTTGAGG-CAA      | 1379 |
| Sbjct | 1364 | <br>CTGGTATAGTCACTTCTTAGAGGGACTATCGATTTCAAGTCGATGGAAGTTTGAGGCCAA  | 1423 |
| Query | 1380 | TAACAGGTCTGTGATGCCCTTAGACGTTCTGGGCCGCACGCGCGCTACACTGACGGAGCC      | 1439 |
| Sbjct | 1424 | <br>TAACAGGTCTGTGATGCCCTTAGACGTTCTGGGCCGCACGCGCGCTACACTGACGGAGCC  | 1483 |
| Query | 1440 | AACGAGTATTAACCTTGCCGAGAGGTCTGGGAAATCTTGTGAAACTCCGTCGTGCTGGG       | 1499 |
| Sbjct | 1484 | <br>AACGAGTATTAACCTTGCCGAGAGGTCTGGGAAATCTTGTGAAACTCCGTCGTGCTGGG   | 1543 |
| Query | 1500 | GATAGAGCATTGTAATTATTGCTCTTCAACGAGGAATTCCTAGTAAGCGCAAGTCATCAG      | 1559 |
| Sbjct | 1544 | <br>GATAGAGCATTGTAATTATTGCTCTTCAACGAGGAATTCCTAGTAAGCGCAAGTCATCAG  | 1603 |
| Query | 1560 | CTTGCGTTGATTACGTCCCTGCCCTTTGTACACACCGCCCGTCGCTACTACCGATTGAAT      | 1619 |
| Sbjct | 1604 | <br>CTTGCGTTGATTACGTCCCTGCCCTTTGTACACACCGCCCGTCGCTACTACCGATTGAAT  | 1663 |
| Query | 1620 | GGCTTAGTGAGGCCTCCGGATTGGTTTTAAAGAAGGGGGCAACTCCATCTTGAACCGAAA      | 1679 |
| Sbjct | 1664 | <br>GGCTTAGTGAGGCCTCCGGATTGGTTTTAAAGAAGGGGGCAACTCCATCTTGAACCGAAA  | 1723 |
| Query | 1680 | AGCTGGTCAAACCTGGTCAATTTAGAGGAAGTAAAAGTCGTAACAAGGTTTCCGTAGGTGA     | 1739 |
| Sbjct | 1724 | <br>AGCTGGTCAAACCTGGTCAATTTAGAGGAAGTAAAAGTCGTAACAAGGTTTCCGTAGGTGA | 1783 |
| Query | 1740 | ACCTGCGGAAGGATCATTACA 1760                                        |      |
| Sbjct | 1784 | <br>ACCTGCGGAAGGATCATTACA 1804                                    |      |

>gb|EF194890.1| Pichia guilliermondii strain HJM 18S ribosomal RNA gene, partial sequence  
Length=1773

Score = 3157 bits (1709), Expect = 0.0  
Identities = 1736/1748 (99%), Gaps = 5/1748 (0%)  
Strand=Plus/Plus

|       |     |                                                                   |     |
|-------|-----|-------------------------------------------------------------------|-----|
| Query | 3   | GCCATGCATGTCTAAGTATAAGCAATTTATACAGTGAAACTGCGAATGGCTCATTAAATC      | 62  |
| Sbjct | 29  | <br>GCCATGCATGTCTAAGTATAAGCAATTTATACAGTGAAACTGCGAATGGCTCATTAAATC  | 88  |
| Query | 63  | AGTTATCGTTTATTTGATAGTACCTTTACTACTTGGATAACCGTGGTAATTCTAGAGCTA      | 122 |
| Sbjct | 89  | <br>AGTTATCGTTTATTTGATAGTACCTTTACTACTTGGATAACCGTGGTAATTCTAGAGCTA  | 148 |
| Query | 123 | ATACATGCTAAAAATCCCGACTGTTTGGGAAGGGATGTATTTATTAGATAAAAAATCAATG     | 182 |
| Sbjct | 149 | <br>ATACATGCTAAAAATCCCGACTGTTTGGGAAGGGATGTATTTATTAGATAAAAAATCAATG | 208 |



|       |      |                                                               |      |
|-------|------|---------------------------------------------------------------|------|
| Query | 183  | CT-TTTCGGAGCTCTTTGATGATTCATAATAACTTTTCGAATCGCATGGCCTTGTGCTGG  | 241  |
|       |      |                                                               |      |
| Sbjct | 209  | CTCTTT--GAGCTCTTTGATGATTCATAATAACTTTTCGAATCGCATGGCCTTGTGCTGG  | 266  |
| Query | 242  | CGATGGTTCATTCAAATTTCTGCCCTATCAACTTTCGATGGTAGGATAGTGGCCTACCAT  | 301  |
|       |      |                                                               |      |
| Sbjct | 267  | CGATGGTTCATTCAAATTTCTGCCCTATCAACTTTCGATGGTAGGATAGTGGCCTACCAT  | 326  |
| Query | 302  | GGTTTCAACGGGTAACGGGGAATAAGGGTTCGATTCCGGAGAGGGAGCCTGAGAAACGGC  | 361  |
|       |      |                                                               |      |
| Sbjct | 327  | GGTTTCAACGGGTAACGGGGAATAAGGGTTCGATTCCGGAGAGGGAGCCTGAGAAACGGC  | 386  |
| Query | 362  | TACCACATCCAAGGAAGGCAGCAGGCGCGCAAATTACCCAATCCCGACACGGGGAGGTAG  | 421  |
|       |      |                                                               |      |
| Sbjct | 387  | TACCACATCCAAGGAAGGCAGCAGGCGCGCAAATTACCCAATCCCGACACGGGGAGGTAG  | 446  |
| Query | 422  | TGACAATAAATAACGATACAGGGCCCTTTCGGGTCTTGTAATTGGAATGAGTACAATGTA  | 481  |
|       |      |                                                               |      |
| Sbjct | 447  | TGACAATACATAACGATACAGGGCCCTTTCGGGTCTTGTAATTGGAATGAGTACAATGTA  | 506  |
| Query | 482  | AATACCTTAACGAGGAACAATTGGAGGGCAAGTCTGGTGCCAGCAGCCGCGGTAATTCCA  | 541  |
|       |      |                                                               |      |
| Sbjct | 507  | AATACCTTAACGAGGAACAATTGGAGGGCAAGTCTGGTGCCAGCAGCCGCGGTAATTCCA  | 566  |
| Query | 542  | GCTCCAATAGCGTATATTAAGTTGTTGCAGTTAAAAAGCTCGTAGTTGAACCTTGGGCT   | 601  |
|       |      |                                                               |      |
| Sbjct | 567  | GCTCCAATAGCGTATATTAAGTTGTTGCAGTTAAAAAGCTCGTAGTTGAACCTTGGGCT   | 626  |
| Query | 602  | TGGTTGGCCGGTCCGCCTTTTTGGCGAGTACTGGACCCAACCGAGCCTTTCCTTCTGGCT  | 661  |
|       |      |                                                               |      |
| Sbjct | 627  | TGGTTGGCCGGTCCGCCTTTTTGGCGAGTACTGGACCCAACCGAGCCTTTCCTTCTGGCT  | 686  |
| Query | 662  | AACCTTTCGCCCTTGTGGTGTGTTGGCGAACCAGGACTTTTACTTTGAAAAATTAGAGTG  | 721  |
|       |      |                                                               |      |
| Sbjct | 687  | AACCATTCGCCCTTGTGGTGTGTTGGCGAACCAGGACTTTTACTTTGAAAAATTAGAGTG  | 746  |
| Query | 722  | TTCAAAGCAGGCCTTTGCTCGAATATATTAGCATGGAATAATAGAATAGGACGTTATGGT  | 781  |
|       |      |                                                               |      |
| Sbjct | 747  | TTCAAAGCAGGCCTTTGCTCGAATATATTAGCATGGAATAATAGAATAGGACGTTATGGT  | 806  |
| Query | 782  | TCTATTTTGTGGTTTCTAGGACCATCGTAATGATTAATAGGGACGGTCGGGGGCATCAG   | 841  |
|       |      |                                                               |      |
| Sbjct | 807  | TCTATTTTGTGGTTTCTAGGACCATCGTAATGATTAATAGGGACGGTCGGGGGCATCAG   | 866  |
| Query | 842  | TATTCAGTTGTCAGAGGTGAAATTCTTGGA-TTACCTGAAGACTAACTACTGCGAAAGCA  | 900  |
|       |      |                                                               |      |
| Sbjct | 867  | TATTCAGTTGTCAGAGGTGAAATTCTTAGATTTA-CTGAAGACTAACTACTGCGAAAGCA  | 925  |
| Query | 901  | TTTGCCAAGGACGTTTTTCATTAATCAAGAACGAAAGTTAGGGGATCGAAGATGATCAGAT | 960  |
|       |      |                                                               |      |
| Sbjct | 926  | TTTGCCAAGGACGTTTTTCATTAATCAAGAACGAAAGTTAGGGGATCGAAGATGATCAGAT | 985  |
| Query | 961  | ACCGTCGTAGTCTTAACCATAAACTATGCCGACTAGGGATCGGGTGTGTTCTtttttttG  | 1020 |
|       |      |                                                               |      |
| Sbjct | 986  | ACCGTCGTAGTCTTAACCATAAACTATGCCGACTAGGGATCGGGTGTGTTCTTTTTTTG   | 1045 |
| Query | 1021 | ACGCACTCGGCACCTTACGAGAAATCAAAGTCTTTGGGTTCTGGGGGAGTATGGTCGCA   | 1080 |
|       |      |                                                               |      |
| Sbjct | 1046 | ACGCACTCGGCACCTTACGAGAAATCAAAGTCTTTGGGTTCTGGGGGAGTATGGTCGCA   | 1105 |
| Query | 1081 | AGGCTGAAACTTAAAGGAATTGACCGAAGGGCACCACCAGGAGTGGAGCCTGCGGCTTAA  | 1140 |
|       |      |                                                               |      |
| Sbjct | 1106 | AGGCTGAAACTTAAAGGAATTGACCGAAGGGCACCACCAGGAGTGGAGCCTGCGGCTTAA  | 1165 |







|       |      |                                                                |      |
|-------|------|----------------------------------------------------------------|------|
| Sbjct | 201  | CTTTTCGGAGCTCTTTGATGATTCATAATAACTTTTCGAATCGCATGGCCTTGTGCTGGC   | 260  |
| Query | 243  | GATGGTTCATTCAAATTTCTGCCCTATCAACTTTTCGATGGTAGGATAGTGGCCTACCATG  | 302  |
| Sbjct | 261  | GATGGTTCATTCAAATTTCTGCCCTATCAACTTTTCGATGGTAGGATAGTGGCCTACCATG  | 320  |
| Query | 303  | GTTTCAACGGGTAACGGGGAATAAGGGTTCGATTCGGAGAGGGAGCCTGAGAAACGGCT    | 362  |
| Sbjct | 321  | GTTTCAACGGGTAACGGGGAATAAGGGTTCGATTCGGAGAGGGAGCCTGAGAAACGGCT    | 380  |
| Query | 363  | ACCACATCCAAGGAAGGCAGCAGGCGCGCAAATTACCCAATCCCGACACGGGGAGGTAGT   | 422  |
| Sbjct | 381  | ACCACATCCAAGGAAGGCAGCAGGCGCGCAAATTACCCAATCCCGACACGGGGAGGTAGT   | 440  |
| Query | 423  | GACAATAAATAACGATACAGGGCCCTTTTCGGGTCTTGTAAATTGGAATGAGTACAATGTAA | 482  |
| Sbjct | 441  | GACAATAAATAACGATACAGGGCCCTTTTCGGGTCTTGTAAATTGGAATGAGTACAATGTAA | 500  |
| Query | 483  | ATACCTTAACGAGGAACAATTGGAGGGCAAGTCTGGTGCCAGCAGCCGCGGTAATTCCAG   | 542  |
| Sbjct | 501  | ATACCTTAACGAGGAACAATTGGAGGGCAAGTCTGGTGCCAGCAGCCGCGGTAATTCCAG   | 560  |
| Query | 543  | CTCCAATAGCGTATATTAAAGTTGTTGCAGTTAAAAAGCTCGTAGTTGAACCTTGGGCTT   | 602  |
| Sbjct | 561  | CTCCAATAGCGTATATTAAAGTTGTTGCAGTTAAAAAGCTCGTAGTTGAACCTTGGGCTT   | 620  |
| Query | 603  | GGTTGGCCGGTCCGCCTTTTTGGCGAGTACTGGACCCAACCGAGCCTTTCCTTCTGGCTA   | 662  |
| Sbjct | 621  | GGTTGGCCGGTCCGCCTTTTTGGCGAGTACTGGACCCAACCGAGCCTTTCCTTCTGGCTA   | 680  |
| Query | 663  | ACCTTTTCGCCCTTGTGGTGTGGCGAACCAGGACTTTTACTTTGAAAAAATTAGAGTGT    | 722  |
| Sbjct | 681  | ACCTTTTCGCCCTTGTGGTGTGGCGAACCAGGACTTTTACTTTGAAAAAATTAGAGTGT    | 740  |
| Query | 723  | TCAAAGCAGGCCTTTGCTCGAATATATTAGCATGGAATAATAGAATAGGACGTTATGGTT   | 782  |
| Sbjct | 741  | TCAAAGCAGGCCTTTGCTCGAATATATTAGCATGGAATAATAGAATAGGACGTTATGGTT   | 800  |
| Query | 783  | CTATTTTGTGGTTTCTAGGACCATCGTAATGATTAATAGGGACGGTCGGGGGCATCAGT    | 842  |
| Sbjct | 801  | CTATTTTGTGGTTTCTAGGACCATCGTAATGATTAATAGGGACGGTCGGGGGCATCAGT    | 860  |
| Query | 843  | ATTCAGTTGTCAGAGGTGAAATTCTTGGATT-ACCTGAAGACTAACTACTGCGAAAGCAT   | 901  |
| Sbjct | 861  | ATTCAGTTGTCAGAGGTGAAATTCTTGGATT-TGAAGACTAACTACTGCGAAAGCAT      | 919  |
| Query | 902  | TT-GCCAAGGACGTTTTTCATTAATCAAGAACGAAAGTTAGGGGATCGAAGATGATCAGAT  | 960  |
| Sbjct | 920  | TTTGCCAAGGACGTTTTTCATTAATCAAGAACGAAAGTTAGGGGATCGAAGATGATCAGAT  | 979  |
| Query | 961  | ACCGTCGTAGTCTTAACCATAAACTATGCCGACTAGGGATCGGGTGTGTTCTtttttttG   | 1020 |
| Sbjct | 980  | ACCGTCGTAGTCTTAACCATAAACTATGCCGACTAGGGATCGGGTGTGTTCTTTTTTTTG   | 1039 |
| Query | 1021 | ACGCACTCGGCACCTTACGAGAAATCAAAGTCTTTGGGTTCTGGGGGAGTATGGTCGCA    | 1080 |
| Sbjct | 1040 | ACGCACTCGGCACCTTACGGGAAATCAAAGTCTTTGGGTTCTGGGGGAGTATGGTCGCA    | 1099 |
| Query | 1081 | AGGCTGAAACTTAAAGGAATTGACGGAAGGGCACCACCAGGAGTGGAGCCTGCGGCTTAA   | 1140 |
| Sbjct | 1100 | AGGCTGAAACTTAAAGGAATTGACGGAAGGGCACCACCAGGAGTGG-GACTGCGGCTTAA   | 1158 |
| Query | 1141 | TTTGACTCAACACGGGAAACTCACCAGTCCAGACACAATAAGGATTGACAGATTGAGA     | 1200 |

|       |      |                                                              |      |
|-------|------|--------------------------------------------------------------|------|
| Sbjct | 1159 | TTTACTCAACACGGGGAAACTCACCAGGTCAGACACAATAAGGATTGACAGATTGAGA   | 1218 |
| Query | 1201 | GCTCTTTCTTGATTTTGTGGGTGGTGGTGCATGGCCGTTCTTAGTTGGTGGAGTGATTTG | 1260 |
| Sbjct | 1219 | GCTCTTTCTTGATTTTGTGGGTGGTGGTGCATGGCCGTTCTTAGTTGGTGGAGTGATTTG | 1278 |
| Query | 1261 | TCTGCTTAATTGCGATAACGAACGAGACCTTAACCTACTAAATAGTGCTGCTAGCTTTTG | 1320 |
| Sbjct | 1279 | TCTGCTTAATNNGATAACGAACGAGACCTTAACCTACTAAATAGTGCTGCTAGCTTTTG  | 1338 |
| Query | 1321 | CTGGTATAGTCACTTCTTAGAGGGACTATCGATTTCAAGTCGATGGAAGTTTGAGGCAAT | 1380 |
| Sbjct | 1339 | CTGGTATAGTCACTTCTTAGAGGGACTATCGATTTCAAGTCGATGGAAGTTTGAGGCAAT | 1398 |
| Query | 1381 | AACAGGTCTGTGATGCCCTTAGACGTTCTGGGCCGCACGCGCTACACTGACGGAGCCA   | 1440 |
| Sbjct | 1399 | AACAGGTCTGTGATGCCCTTAGACGTTCTGGGCCGCACGCGCTACACTGACGGAGCCA   | 1458 |
| Query | 1441 | ACGAGTATTAACCTTGGCCGAGAGGTCTGGGAAATCTTGTGAAACTCCGTCGTGCTGGGG | 1500 |
| Sbjct | 1459 | ACGAGTATTAACCTTGGCCGAGAGGTCTGGGAAATCTTGTGAAACTCCGTCGTGCTGGGG | 1518 |
| Query | 1501 | ATAGAGCATTGTAATTATTGCTCTTCAACGAGGAATTCCTAGTAAGCGCAAGTCATCAGC | 1560 |
| Sbjct | 1519 | ATAGAGCATTGTAATTATTGCTCTTCAACGAGGAATTCCTAGTAAGCGCAAGTCATCAGC | 1578 |
| Query | 1561 | TTGCGTTGATTACGTCCCTGCCCTTTGTACACACCGCCCGTCGCTACTACCGATTGAATG | 1620 |
| Sbjct | 1579 | TTGCGTTGATTACGTCCCTGCCCTTTGTACACACCGCCCGTCGCTACTACCGATTGAATG | 1638 |
| Query | 1621 | GCTTAGTGAGGCCTCCGGATTGGTTTAAAGAAGGGGGCAACTCCATCTTGAACCGAAAA  | 1680 |
| Sbjct | 1639 | GCTTAGTGAGGCCTCCGGATTGGTTTAAAGAAGGGGGCAACTCCATCTTGAACCGAAAA  | 1698 |
| Query | 1681 | GCTGGTCAAACCTGGTCATTTAGAGGAAGTAAAAGTCGTAACAAGGTTTCCGTAG      | 1735 |
| Sbjct | 1699 | GCTGGTCAAACCTGGTCATTTAGAGGAAGTAAAAGTCGTAACAAGGTTTCCGTAG      | 1753 |

>dbj|AB054269.1| *Debaryomyces hansenii* var. *fabryi* gene for 18S rRNA, partial sequence, stain:JCM 2104  
Length=1753

Score = 3157 bits (1709), Expect = 0.0  
Identities = 1726/1735 (99%), Gaps = 4/1735 (0%)  
Strand=Plus/Plus

|       |     |                                                              |     |
|-------|-----|--------------------------------------------------------------|-----|
| Query | 3   | GCCATGCATGTCTAAGTATAAGCAATTTATACAGTGAAACTGCGAATGGCTCATTAAATC | 62  |
| Sbjct | 21  | GCCATGCATGTCTAAGTATAAGCAATTTATACAGTGAAACTGCGAATGGCTCATTAAATC | 80  |
| Query | 63  | AGTTATCGTTTATTTGATAGTACCTTTACTACTTGGATAACCGTGGTAATTCTAGAGCTA | 122 |
| Sbjct | 81  | AGTTATCGTTTATTTGATAGTACCTTTACTACTTGGATAACCGTGGTAATTCTAGAGCTA | 140 |
| Query | 123 | ATACATGCTAAAAATCCCGACTGTTTGAAGGGATGTATTTATTAGATAAAAAATCAATG  | 182 |
| Sbjct | 141 | ATACATGCTAAAAATCCCGACTGTTTGAAGGGATGTATTTATTAGATAAAAAATCAATG  | 200 |
| Query | 183 | CTTTTCGGAGCTCTTTGATGATTCATAATAACTTTTCGAATCGCATGGCCTTGTGCTGGC | 242 |
| Sbjct | 201 | CTTTTCGGAGCTCTTTGATGATTCATAATAACTTTTCGAATCGCATGGCCTTGTGCTGGC | 260 |
| Query | 243 | GATGGTTCATTCAAATTTCTGCCCTATCAACTTTCGATGGTAGGATAGTGGCCTACCATG | 302 |

|       |      |                                                                   |      |
|-------|------|-------------------------------------------------------------------|------|
| Sbjct | 261  | <br>GATGGTTCATTCAAATTTCTGCCCTATCAACTTTCGATGGTAGGATAGTGGCCTACCATG  | 320  |
| Query | 303  | GTTTCAACGGGTAACGGGAATAAGGGTTCGATTCCGGAGAGGGAGCCTGAGAAACGGCT       | 362  |
| Sbjct | 321  | <br>GTTTCAACGGGTAACGGGAATAAGGGTTCGATTCCGGAGAGGGAGCCTGAGAAACGGCT   | 380  |
| Query | 363  | ACCACATCCAAGGAAGGCAGCAGGCGCGCAAATTACCCAATCCCGACACGGGGAGGTAGT      | 422  |
| Sbjct | 381  | <br>ACCACATCCAAGGAAGGCAGCAGGCGCGCAAATTACCCAATCCCGACACGGGGAGGTAGT  | 440  |
| Query | 423  | GACAATAAATAACGATACAGGGCCCTTTCGGGTCTTGTAATTGGAATGAGTACAATGTAA      | 482  |
| Sbjct | 441  | <br>GACAATAAATAACGATACAGGGCCCTTTCGGGTCTTGTAATTGGAATGAGTACAATGTAA  | 500  |
| Query | 483  | ATACCTTAACGAGGAACAATTGGAGGGCAAGTCTGGTGCCAGCAGCCGCGGTAATTCCAG      | 542  |
| Sbjct | 501  | <br>ATACCTTAACGAGGAACAATTGGAGGGCAAGTCTGGTGCCAGCAGCCGCGGTAATTCCAG  | 560  |
| Query | 543  | CTCCAATAGCGTATATTAAGTTGTTGCAGTTAAAAAGCTCGTAGTTGAACCTTGGGCTT       | 602  |
| Sbjct | 561  | <br>CTCCAATAGCGTATATTAAGTTGTTGCAGTTAAAAAGCTCGTAGTTGAACCTTGGGCTT   | 620  |
| Query | 603  | GGTTGGCCGGTCCGCCTTTTTGGCGAGTACTGGACCCAACCGAGCCTTTCCTTCTGGCTA      | 662  |
| Sbjct | 621  | <br>GGTTGGCCGGTCCGCCTTTTTGGCGAGTACTGGACCCAACCGAGCCTTTCCTTCTGGCTA  | 680  |
| Query | 663  | ACCTTTTCGCCCTTGTGGTGTGGCGAACCAGGACTTTTACTTTGAAAAATTAGAGTGT        | 722  |
| Sbjct | 681  | <br>ACCTTTTCGCCCTTGTGGTGTGGCGAACCAGGACTTTTACTTTGAAAAATTAGAGTGT    | 740  |
| Query | 723  | TCAAAGCAGGCCTTTGCTCGAATATATTAGCATGGAATAATAGAATAGGACGTTATGGTT      | 782  |
| Sbjct | 741  | <br>TCAAAGCAGGCCTTTGCTCGAATATATTAGCATGGAATAATAGAATAGGACGTTATGGTT  | 800  |
| Query | 783  | CTATTTTGTGGTTTCTAGGACCATCGTAATGATTAATAGGGACGGTCGGGGGCATCAGT       | 842  |
| Sbjct | 801  | <br>CTATTTTGTGGTTTCTAGGACCATCGTAATGATTAATAGGGACGGTCGGGGGCATCAGT   | 860  |
| Query | 843  | ATTCAGTTGTCAGAGGTGAAATTCTTGGATT-ACCTGAAGACTAACTACTGCGAAAGCAT      | 901  |
| Sbjct | 861  | <br>ATTCAGTTGTCAGAGGTGAAATTCTTGGATTAC-TGAAGACTAACTACTGCGAAAGCAT   | 919  |
| Query | 902  | TT-GCCAAGGACGTTTTTCATTAATCAAGAACGAAAGTTAGGGGATCGAAGATGATCAGAT     | 960  |
| Sbjct | 920  | <br>TTTGCCAAGGACGTTTTTCATTAATCAAGAACGAAAGTTAGGGGATCGAAGATGATCAGAT | 979  |
| Query | 961  | ACCGTCGTAGTCTTAACCATAAACTATGCCGACTAGGGATCGGGTGTGTTCTtttttttG      | 1020 |
| Sbjct | 980  | <br>ACCGTCGTAGTCTTAACCATAAACTATGCCGACTAGGGATCGGGTGTGTTCTTTTTTTG   | 1039 |
| Query | 1021 | ACGCACTCGGCACCTTACGAGAAATCAAAGTCTTTGGGTTCTGGGGGAGTATGGTCGCA       | 1080 |
| Sbjct | 1040 | <br>ACGCACTCGGCACCTTACGGGAAATCAAAGTCTTTGGGTTCTGGGGGAGTATGGTCGCA   | 1099 |
| Query | 1081 | AGGCTGAAACTTAAAGGAATTGACGGAAGGGCACCACCAGGAGTGGAGCCTGCGGCTTAA      | 1140 |
| Sbjct | 1100 | <br>AGGCTGAAACTTAAAGGAATTGACGGAAGGGCACCACCAGGAGTGG-GACTGCGGCTTAA  | 1158 |
| Query | 1141 | TTTGACTCAACACGGGGAAACTCACCAGGTCCAGACACAATAAGGATTGACAGATTGAGA      | 1200 |
| Sbjct | 1159 | <br>TTTGACTCAACACGGGGAAACTCACCAGGTCCAGACACAATAAGGATTGACAGATTGAGA  | 1218 |
| Query | 1201 | GCTCTTTCTTGATTTTGTGGGTGGTGGTGCATGGCCGTTCTTAGTTGGTGGAGTGATTTG      | 1260 |

|       |      |                                                                  |      |
|-------|------|------------------------------------------------------------------|------|
| Sbjct | 1219 | <br>GCTCTTTCTTGATTTTGTGGGTGGTGGTGCATGGCCGTTCTTAGTTGGTGGAGTGATTTG | 1278 |
| Query | 1261 | TCTGCTTAATTGCGATAACGAACGAGACCTAACCTACTAAATAGTGCTGCTAGCTTTTG      | 1320 |
| Sbjct | 1279 | <br>TCTGCTTAATNNGATAACGAACGAGACCTAACCTACTAAATAGTGCTGCTAGCTTTTG   | 1338 |
| Query | 1321 | CTGGTATAGTCACTTCTTAGAGGGACTATCGATTTCAAGTCGATGGAAGTTTGAGGCAAT     | 1380 |
| Sbjct | 1339 | <br>CTGGTATAGTCACTTCTTAGAGGGACTATCGATTTCAAGTCGATGGAAGTTTGAGGCAAT | 1398 |
| Query | 1381 | AACAGGTCTGTGATGCCCTTAGACGTTCTGGGCCGCACGCGCTACACTGACGGAGCCA       | 1440 |
| Sbjct | 1399 | <br>AACAGGTCTGTGATGCCCTTAGACGTTCTGGGCCGCACGCGCTACACTGACGGAGCCA   | 1458 |
| Query | 1441 | ACGAGTATTAACCTTGGCCGAGAGGTCTGGGAAATCTTGTGAAACTCCGTCGTGCTGGGG     | 1500 |
| Sbjct | 1459 | <br>ACGAGTATTAACCTTGGCCGAGAGGTCTGGGAAATCTTGTGAAACTCCGTCGTGCTGGGG | 1518 |
| Query | 1501 | ATAGAGCATTGTAATTATTGCTCTTCAACGAGGAATTCCTAGTAAGCGCAAGTCATCAGC     | 1560 |
| Sbjct | 1519 | <br>ATAGAGCATTGTAATTATTGCTCTTCAACGAGGAATTCCTAGTAAGCGCAAGTCATCAGC | 1578 |
| Query | 1561 | TTGCGTTGATTACGTCCCTGCCCTTTGTACACACCGCCCGTCGCTACTACCGATTGAATG     | 1620 |
| Sbjct | 1579 | <br>TTGCGTTGATTACGTCCCTGCCCTTTGTACACACCGCCCGTCGCTACTACCGATTGAATG | 1638 |
| Query | 1621 | GCTTAGTGAGGCCTCCGGATTGGTTTAAAGAAGGGGGCAACTCCATCTTGAACCGAAAA      | 1680 |
| Sbjct | 1639 | <br>GCTTAGTGAGGCCTCCGGATTGGTTTAAAGAAGGGGGCAACTCCATCTTGAACCGAAAA  | 1698 |
| Query | 1681 | GCTGGTCAAACCTTGGTCATTTAGAGGAAGTAAAAGTCGTAACAAGGTTTCCGTAG         | 1735 |
| Sbjct | 1699 | <br>GCTGGTCAAACCTTGGTCATTTAGAGGAAGTAAAAGTCGTAACAAGGTTTCCGTAG     | 1753 |

>dbj|AB013555.1| Candida krissii 18S rRNA gene, strain JCM 9454, partial sequence  
Length=1782

Score = 3157 bits (1709), Expect = 0.0  
Identities = 1743/1758 (99%), Gaps = 7/1758 (0%)  
Strand=Plus/Plus

|       |     |                                                                   |     |
|-------|-----|-------------------------------------------------------------------|-----|
| Query | 3   | GCCATGCATGTCTAAGTATAAGCAATTTATACAGTGAAACTGCGAATGGCTCATTAAATC      | 62  |
| Sbjct | 30  | <br>GCCATGCATGTCTAAGTATAAGCAATTTATACAGTGAAACTGCGAATGGCTCATTAAATC  | 89  |
| Query | 63  | AGTTATCGTTTATTTGATAGTACCTTTACTACTTGGATAACCGTGGTAATTCTAGAGCTA      | 122 |
| Sbjct | 90  | <br>AGTTATCGTTTATTTGATAGTACCTTTACTACTTGGATAACCGTGGTAATTCTAGAGCTA  | 149 |
| Query | 123 | ATACATGCTAAAAATCCCGACTGTTTGAAGGGATGTATTTATTAGATAAAAAATCAATG       | 182 |
| Sbjct | 150 | <br>ATACATGCTAAAAATCCCGACT-TCTGGAAGGGATGTATTTATTAGATAAAAAATCAATG  | 208 |
| Query | 183 | CTTTTCGGAGCTCTTTGATGATTCATAATAACTTTTCGAATCGCATGGCCTTGTGCTGGC      | 242 |
| Sbjct | 209 | <br>CTTTTCGGAGCTCTTTGATGATTCATAATAACTTTTCGAATCGCATGGCCTTGTGCTGGC  | 268 |
| Query | 243 | GATGGTTCATTCAAATTTCTGCCCTATCAACTTTTCGATGGTAGGATAGTGGCCTACCATG     | 302 |
| Sbjct | 269 | <br>GATGGTTCATTCAAATTTCTGCCCTATCAACTTTTCGATGGTAGGATAGTGGCCTACCATG | 328 |
| Query | 303 | GTTTCAACGGGTAACGGGGAATAAGGGTTCGATTCGGAGAGGGAGCCTGAGAAACGGCT       | 362 |



|       |      |                                                                  |      |
|-------|------|------------------------------------------------------------------|------|
| Sbjct | 329  | <br>GTTTCAACGGGTAACGGGAATAAGGGTTCGATTCCGGAGAGGGAGCCTGAGAAACGGCT  | 388  |
| Query | 363  | ACCACATCCAAGGAAGGCAGCAGGCGCAAATTACCCAATCCCACACGGGGAGGTAGT        | 422  |
| Sbjct | 389  | <br>ACCACATCCAAGGAAGGCAGCAGGCGCAAATTACCCAATCCCACACGGGGAGGTAGT    | 448  |
| Query | 423  | GACAATAAATAACGATACAGGGCCCTTTCGGGTCTTGTAATTGGAATGAGTACAATGTAA     | 482  |
| Sbjct | 449  | <br>GACAATAAATAACGATACAGGGCCCTTTCGGGTCTTGTAATTGGAATGAGTACAATGTAA | 508  |
| Query | 483  | ATACCTTAACGAGGAACAATTGGAGGGCAAGTCTGGTGCCAGCAGCCGCGGTAATTCCAG     | 542  |
| Sbjct | 509  | <br>ATACCTTAACGAGGAACAATTGGAGGGCAAGTCTGGTGCCAGCAGCCGCGGTAATTCCAG | 568  |
| Query | 543  | CTCCAATAGCGTATATTAAAGTTGTTGCAGTTAAAAAGCTCGTAGTTGAACCTTGGGCTT     | 602  |
| Sbjct | 569  | <br>CTCCAATAGCGTATATTAAAGTTGTTGCAGTTAAAAAGCTCGTAGTTGAACCTTGGGCTT | 628  |
| Query | 603  | GGTTGGCCGGTCCGCCTTTTTGGCGAGTACTGGACCCAACCGAGCCTTTCCTTCTGGCTA     | 662  |
| Sbjct | 629  | <br>GGTTGGCCGGTCCG-CTTTATGGCGAGTACTGGACCCAACCGAGCCTTTCCTTCTGGCTA | 687  |
| Query | 663  | ACCTTTTCGCCCTTGTGGTGTGGGGAACCAGGACTTTTACTTTGAAAAATTAGAGTGT       | 722  |
| Sbjct | 688  | <br>ACCTTTTCGCCCTTGTGGTGTGGGGAACCAGGACTTTTACTTTGAAAAATTAGAGTGT   | 747  |
| Query | 723  | TCAAAGCAGGCCTTTGCTCGAATATATTAGCATGGAATAATAGAATAGGACGTTATGGTT     | 782  |
| Sbjct | 748  | <br>TCAAAGCAGGCCTTTGCTCGAATATATTAGCATGGAATAATAGAATAGGACGTTATGGTT | 807  |
| Query | 783  | CTATTTTGTGGTTTCTAGGACCATCGTAATGATTAATAGGGACGGTCGGGGGCATCAGT      | 842  |
| Sbjct | 808  | <br>CTATTTTGTGGTTTCTAGGACCATCGTAATGATTAATAGGGACGGTCGGGGGCATCAGT  | 867  |
| Query | 843  | ATTCAGTTGTCAGAGGTGAAATTCTTGGA-TTACCTGAAGACTAACTACTGCGAAAGCAT     | 901  |
| Sbjct | 868  | <br>ATTCAGTTGTCAGAGGTGAAATTCTTGGA-TTACCTGAAGACTAACTACTGCGAAAGCAT | 926  |
| Query | 902  | TTGCCAAGGACGTTTTCATTAATCAAGAACGAAAGTTAGGGGATCGAAGATGATCAGATA     | 961  |
| Sbjct | 927  | <br>TTGCCAAGGACGTTTTCATTAATCAAGAACGAAAGTTAGGGGATCGAAGATGATCAGATA | 986  |
| Query | 962  | CCGTCGTAGTCTTAACCATAAACTATGCCGACTAGGGATCGGGTGTGTTCTtttttttGA     | 1021 |
| Sbjct | 987  | <br>CCGTCGTAGTCTTAACCATAAACTATGCCGACTAGGGATCGGGTGTGTTCTTTTTTTGA  | 1046 |
| Query | 1022 | CGCACTCGGCACCTTACGAGAAATCAAAGTCTTTGGGTTCTGGGGGAGTATGGTCGCAA      | 1081 |
| Sbjct | 1047 | <br>CGCACTCGGCACCTTACGAGAAATCAAAGTCTTTGGGTTCTGGGGGAGTATGGTCGCAA  | 1106 |
| Query | 1082 | GGCTGAAACTTAAAGGAATTGACGGAAGGGCACCACCAGGAGTGGAGCCTGCGGCTTAAT     | 1141 |
| Sbjct | 1107 | <br>GGCTGAAACTTAAAGGAATTGACGGAAGGGCACCACCAGGAGTGGAGCCTGCGGCTTAAT | 1166 |
| Query | 1142 | TTGACTCAACACGGGGAAACTCACCAGGTCCAGACACAATAAGGATTGACAGATTGAGAG     | 1201 |
| Sbjct | 1167 | <br>TTGACTCAACACGGGGAAACTCACCAGGTCCAGACACAATAAGGATTGACAGATTGAGAG | 1226 |
| Query | 1202 | CTCTTTCTTGATTTTGTGGGTGGTGGTGCATGGCCGTTCTTAGTTGGTGGAGTGATTTGT     | 1261 |
| Sbjct | 1227 | <br>CTCTTTCTTGATTTTGTGGGTGGTGGTGCATGGCCGTTCTTAGTTGGTGGAGTGATTTGT | 1286 |
| Query | 1262 | CTGCTTAATTGCGATAACGAACGAGACCTTAACCTACTAAATAGTGCTGCTAGCTTTTGC     | 1321 |

|       |      |                                                                   |      |
|-------|------|-------------------------------------------------------------------|------|
| Sbjct | 1287 | <br>CTGCTTAATTGCGATAACGAACGAGACCTTAACCTACTAAATAGTGCTGCTAGCTTTTGC  | 1346 |
| Query | 1322 | TGGTATAGTCACTTCTTAGAGGGACTATCGATTTCAAGTCGATGGAAGTTTGAGGCAATA      | 1381 |
| Sbjct | 1347 | <br>TGGTATAGTCACTTCTTAGAGGGACTATCGATTTCAAGTCGATGGAAGTTTGAGGCAATA  | 1406 |
| Query | 1382 | ACAGGTCTGTGATGCCCTTAGACGTTCTGGGCCGCACGCGCGCTACACTGACGGAGCCAA      | 1441 |
| Sbjct | 1407 | <br>ACAGGTCTGTGATGCCCTTAGACGTTCTGGGCCGCACGCGCGCTACACTGACGGAGCCAG  | 1466 |
| Query | 1442 | CGAGTAT-TAACCTTGGCCGAGAGGTCTGGGAAATCTTGTGAAACTCCGTCGTGCTGGGG      | 1500 |
| Sbjct | 1467 | <br>CGAGT-TCTAACCTTGGCCGAGAGGTCTGGGTAATCTTGTGAAACTCCGTCGTGCTGGGG  | 1525 |
| Query | 1501 | ATAGAGCATTGTAATTATTGCTCTTCAACGAGGAATTCCTAGTAAGCGCAAGTCATCAGC      | 1560 |
| Sbjct | 1526 | <br>ATAGAGCATTGTAATTATTGCTCTTCAACGAGGAATTCCTAGTAAGCGCAAGTCATCAGC  | 1585 |
| Query | 1561 | TTGCGTTGATTACGTCCCTGCCCTTTGTACACACCGCCCGTCGCTACTACCGATTGAATG      | 1620 |
| Sbjct | 1586 | <br>TTGCGTTGATTACGTCCCTGCCCTTTGTACACACCGCCCGTCGCTACTACCGATTGAATG  | 1645 |
| Query | 1621 | GCTTAGTGAGGCCTCCGGATTGGTTTAAAGAAGGGGGCAACTCCATCTTGAACCGAAAA       | 1680 |
| Sbjct | 1646 | <br>GCTTAGTGAGGCTTCCGGATTGGTTTAAAGAAGGGGGCAACTCCATCTTGAACCGAAAA   | 1705 |
| Query | 1681 | GCTGGTCAAACCTTGGTCATTTAGAGGAAGTAAAAGTCGTAACAAGGTTTCCGTAGGTGAA     | 1740 |
| Sbjct | 1706 | <br>GCTAGTCAAACCTTGGTCATTTAGAGGAAGTAAAAGTCGTAACAAGGTTTCCGTAG-TGAA | 1764 |
| Query | 1741 | CCTGCGGAAGGATCATT                                                 | 1758 |
| Sbjct | 1765 | <br>CCTGCGGAAGGATCATT                                             | 1782 |

>dbj|AB013553.1| Candida ralunensis 18S rRNA gene, strain JCM 8923, partial sequence  
Length=1781

Score = 3157 bits (1709), Expect = 0.0  
Identities = 1743/1758 (99%), Gaps = 8/1758 (0%)  
Strand=Plus/Plus

|       |     |                                                                  |     |
|-------|-----|------------------------------------------------------------------|-----|
| Query | 3   | GCCATGCATGTCTAAGTATAAGCAATTTATACAGTGAAACTGCGAATGGCTCATTAAATC     | 62  |
| Sbjct | 30  | <br>GCCATGCATGTCTAAGTATAAGCAATTTATACAGTGAAACTGCGAATGGCTCATTAAATC | 89  |
| Query | 63  | AGTTATCGTTTATTTGATAGTACCTTTACTACTTGGATAACCGTGGTAATTCTAGAGCTA     | 122 |
| Sbjct | 90  | <br>AGTTATCGTTTATTTGATAGTACCTTTACTACTTGGATAACCGTGGTAATTCTAGAGCTA | 149 |
| Query | 123 | ATACATGCTAAAAATCCCGACTGTTTGAAGGGATGTATTTATTAGATAAAAAATCAATG      | 182 |
| Sbjct | 150 | <br>ATACATGCTAAAAATCCCGACT-TCTGGAAGGGATGTATTTATTAGATAAAAAATCAATG | 208 |
| Query | 183 | CTTTTCGGAGCTCTTTGATGATTCATAATAACTTTTCGAATCGCATGGCCTTGTGCTGGC     | 242 |
| Sbjct | 209 | <br>CTTTTCGGAGCTCTTTGATGATTCATAATAACTTTTCGAATCGCATGGCCTTGTGCTGGC | 268 |
| Query | 243 | GATGGTTCATTCAAATTTCTGCCCTATCAACTTTCGATGGTAGGATAGTGGCCTACCATG     | 302 |
| Sbjct | 269 | <br>GATGGTTCATTCAAATTTCTGCCCTATCAACTTTCGATGGTAGGATAGTGGCCTACCATG | 328 |

|       |      |                                                               |      |
|-------|------|---------------------------------------------------------------|------|
| Query | 303  | GTTTCAACGGGTAACGGGGAATAAGGGTTCGATTCCGGAGAGGGAGCCTGAGAAACGGCT  | 362  |
|       |      |                                                               |      |
| Sbjct | 329  | GTTTCAACGGGTAACGGGGAATAAGGGTTCGATTCCGGAGAGGGAGCCTGAGAAACGGCT  | 388  |
| Query | 363  | ACCACATCCAAGGAAGGCAGCAGGCGCAAATTACCCAATCCCGACACGGGGAGGTAGT    | 422  |
|       |      |                                                               |      |
| Sbjct | 389  | ACCACATCCAAGGAAGGCAGCAGGCGCAAATTACCCAATCCCGACACGGGGAGGTAGT    | 448  |
| Query | 423  | GACAATAAATAACGATACAGGGCCCTTTCGGGTCTTGTAATTGGAATGAGTACAATGTAA  | 482  |
|       |      |                                                               |      |
| Sbjct | 449  | GACAATAAATAACGATACAGGG-CCTTTCGGGTCTTGTAATTGGAATGAGTACAATGTAA  | 507  |
| Query | 483  | ATACCTTAACGAGGAACAATTGGAGGGCAAGTCTGGTGCCAGCAGCCGCGGTAATTCCAG  | 542  |
|       |      |                                                               |      |
| Sbjct | 508  | ATACCTTAACGAGGAACAATTGGAGGGCAAGTCTGGTGCCAGCAGCCGCGGTAATTCCAG  | 567  |
| Query | 543  | CTCCAATAGCGTATATTAAAGTTGTTGCAGTTAAAAAGCTCGTAGTTGAACCTTGGGCTT  | 602  |
|       |      |                                                               |      |
| Sbjct | 568  | CTCCAATAGCGTATATTAAAGTTGTTGCAGTTAAAAAGCTCGTAGTTGAACCTTGGGCTT  | 627  |
| Query | 603  | GGTTGGCCGGTCCGCCTTTTTGGCGAGTACTGGACCCAACCGAGCCTTTCCTTCTGGCTA  | 662  |
|       |      |                                                               |      |
| Sbjct | 628  | GGTTGGCCGGTCCG-CTTTTATGGCGAGTACTGGACCCAACCGAGCCTTTCCTTCTGGCTA | 686  |
| Query | 663  | ACCTTTTCGCCCTTGTGGTGTGGGCGAACCAGGACTTTTACTTTGAAAAATTAGAGTGT   | 722  |
|       |      |                                                               |      |
| Sbjct | 687  | ACCTTTTCGCCCTTGTGGTGTGGGCGAACCAGGACTTTTACTTTGAAAAATTAGAGTGT   | 746  |
| Query | 723  | TCAAAGCAGGCCTTTGCTCGAATATATTAGCATGGAATAATAGAATAGGACGTTATGGTT  | 782  |
|       |      |                                                               |      |
| Sbjct | 747  | TCAAAGCAGGCCTTTGCTCGAATATATTAGCATGGAATAATAGAATAGGACGTTATGGTT  | 806  |
| Query | 783  | CTATTTTGTGGTTTCTAGGACCATCGTAATGATTAATAGGGACGGTCGGGGGCATCAGT   | 842  |
|       |      |                                                               |      |
| Sbjct | 807  | CTATTTTGTGGTTTCTAGGACCATCGTAATGATTAATAGGGACGGTCGGGGGCATCAGT   | 866  |
| Query | 843  | ATTCAGTTGTCAGAGGTGAAATTCTTGGA-TTACCTGAAGACTAACTACTGCGAAAGCAT  | 901  |
|       |      |                                                               |      |
| Sbjct | 867  | ATTCAGTTGTCAGAGGTGAAATTCTTGGA-TTACCTGAAGACTAACTACTGCGAAAGCAT  | 925  |
| Query | 902  | TTGCCAAGGACGTTTTCAATTAATCAAGAACGAAAGTTAGGGGATCGAAGATGATCAGATA | 961  |
|       |      |                                                               |      |
| Sbjct | 926  | TTGCCAAGGACGTTTTCAATTAATCAAGAACGAAAGTTAGGGGATCGAAGATGATCAGATA | 985  |
| Query | 962  | CCGTCGTAGTCTTAACCATAAACTATGCCGACTAGGGATCGGGTGTGTTCTtttttttGA  | 1021 |
|       |      |                                                               |      |
| Sbjct | 986  | CCGTCGTAGTCTTAACCATAAACTATGCCGACTAGGGATCGGGTGTGTTCTTTTTTTGA   | 1045 |
| Query | 1022 | CGCACTCGGCACCTTACGAGAAATCAAAGTCTTTGGGTTCTGGGGGAGTATGGTCGCAA   | 1081 |
|       |      |                                                               |      |
| Sbjct | 1046 | CGCACTCGGCACCTTACGAGAAATCAAAGTCTTTGGGTTCTGGGGGAGTATGGTCGCAA   | 1105 |
| Query | 1082 | GGCTGAAACTTAAAGGAATTGACGGAAGGGCACCACCAGGAGTGGAGCCTGCGGCTTAAT  | 1141 |
|       |      |                                                               |      |
| Sbjct | 1106 | GGCTGAAACTTAAAGGAATTGACGGAAGGGCACCACCAGGAGTGGAGCCTGCGGCTTAAT  | 1165 |
| Query | 1142 | TTGACTCAACACGGGGAAACTCACCAGGTCCAGACACAATAAGGATTGACAGATTGAGAG  | 1201 |
|       |      |                                                               |      |
| Sbjct | 1166 | TTGACTCAACACGGGGAAACTCACCAGGTCCAGACACAATAAGGATTGACAGATTGAGAG  | 1225 |
| Query | 1202 | CTCTTTCTTGATTTTGTGGGTGGTGGTGCATGGCCGTTCTTAGTTGGTGGAGTGATTTGT  | 1261 |
|       |      |                                                               |      |
| Sbjct | 1226 | CTCTTTCTTGATTTTGTGGGTGGTGGTGCATGGCCGTTCTTAGTTGGTGGAGTGATTTGT  | 1285 |



|       |      |                                                               |      |
|-------|------|---------------------------------------------------------------|------|
| Query | 303  | GTTTCAACGGGTAACGGGGAATAAGGGTTCGATTCCGGAGAGGGAGCCTGAGAAACGGCT  | 362  |
|       |      |                                                               |      |
| Sbjct | 329  | GTTTCAACGGGTAACGGGGAATAAGGGTTCGATTCCGGAGAGGGAGCCTGAGAAACGGCT  | 388  |
| Query | 363  | ACCACATCCAAGGAAGGCAGCAGGCGCGCAAATTACCCAATCCCGACACGGGGAGGTAGT  | 422  |
|       |      |                                                               |      |
| Sbjct | 389  | ACCACATCCAAGGAAGGCAGCAGGCGCGCAAATTACCCAATCCCGACACGGGGAGGTAGT  | 448  |
| Query | 423  | GACAATAAATAACGATACAGGGCCCTTTCGGGTCTTGTAAATTGGAATGAGTACAATGTAA | 482  |
|       |      |                                                               |      |
| Sbjct | 449  | GACAATAAATAACGATACAGGG-CCTTTCGGGTCTTGTAAATTGGAATGAGTACAATGTAA | 507  |
| Query | 483  | ATACCTTAACGAGGAACAATTGGAGGGCAAGTCTGGTGCCAGCAGCCGCGGTAATTCCAG  | 542  |
|       |      |                                                               |      |
| Sbjct | 508  | ATACCTTAACGAGGAACAATTGGAGGGCAAGTCTGGTGCCAGCAGCCGCGGTAATTCCAG  | 567  |
| Query | 543  | CTCCAATAGCGTATATTAAAGTTGTTGCAGTTAAAAAGCTCGTAGTTGAACCTTGGGCTT  | 602  |
|       |      |                                                               |      |
| Sbjct | 568  | CTCCAATAGCGTATATTAAAGTTGTTGCAGTTAAAAAGCTCGTAGTTGAACCTTGGGCTT  | 627  |
| Query | 603  | GGTTGGCCGGTCCGCCTTTTTGGCGAGTACTGGACCCAACCGAGCCTTTCCTTCTGGCTA  | 662  |
|       |      |                                                               |      |
| Sbjct | 628  | GGTTGGCCGGTCCG-CTTTTATGGCGAGTACTGGACCCAACCGAGCCTTTCCTTCTGGCTA | 686  |
| Query | 663  | ACCTTTTCGCCCTTGTGGTGTGGGCGAACCAGGACTTTTACTTTGAAAAAATTAGAGTGT  | 722  |
|       |      |                                                               |      |
| Sbjct | 687  | ACCTTTTCGCCCTTGTGGTGTGGGCGAACCAGGACTTTTACTTTGAAAAAATTAGAGTGT  | 746  |
| Query | 723  | TCAAAGCAGGCCTTTGCTCGAATATATTAGCATGGAATAATAGAATAGGACGTTATGGTT  | 782  |
|       |      |                                                               |      |
| Sbjct | 747  | TCAAAGCAGGCCTTTGCTCGAATATATTAGCATGGAATAATAGAATAGGACGTTATGGTT  | 806  |
| Query | 783  | CTATTTTGTGGTTTCTAGGACCATCGTAATGATTAATAGGGACGGTCGGGGGCATCAGT   | 842  |
|       |      |                                                               |      |
| Sbjct | 807  | CTATTTTGTGGTTTCTAGGACCATCGTAATGATTAATAGGGACGGTCGGGGGCATCAGT   | 866  |
| Query | 843  | ATTCAGTTGTCAGAGGTGAAATTCTTGGA-TTACCTGAAGACTAACTACTGCGAAAGCAT  | 901  |
|       |      |                                                               |      |
| Sbjct | 867  | ATTCAGTTGTCAGAGGTGAAATTCTTGGA-TTACCTGAAGACTAACTACTGCGAAAGCAT  | 925  |
| Query | 902  | TTGCCAAGGACGTTTTCAATTAATCAAGAACGAAAGTTAGGGGATCGAAGATGATCAGATA | 961  |
|       |      |                                                               |      |
| Sbjct | 926  | TTGCCAAGGACGTTTTCAATTAATCAAGAACGAAAGTTAGGGGATCGAAGATGATCAGATA | 985  |
| Query | 962  | CCGTCGTAGTCTTAACCATAAACTATGCCGACTAGGGATCGGGTGTGTTCTtttttttGA  | 1021 |
|       |      |                                                               |      |
| Sbjct | 986  | CCGTCGTAGTCTTAACCATAAACTATGCCGACTAGGGATCGGGTGTGTTCTTTTTTTTGA  | 1045 |
| Query | 1022 | CGCACTCGGCACCTTACGAGAAATCAAAGTCTTTGGGTTCTGGGGGAGTATGGTCGCAA   | 1081 |
|       |      |                                                               |      |
| Sbjct | 1046 | CGCACTCGGCACCTTACGAGAAATCAAAGTCTTTGGGTTCTGGGGGAGTATGGTCGCAA   | 1105 |
| Query | 1082 | GGCTGAAACTTAAAGGAATTGACGGAAGGGCACCACCAGGAGTGGAGCCTGCGGCTTAAT  | 1141 |
|       |      |                                                               |      |
| Sbjct | 1106 | GGCTGAAACTTAAAGGAATTGACGGAAGGGCACCACCAGGAGTGGAGCCTGCGGCTTAAT  | 1165 |
| Query | 1142 | TTGACTCAACACGGGGAAACTCACCAGGTCCAGACACAATAAGGATTGACAGATTGAGAG  | 1201 |
|       |      |                                                               |      |
| Sbjct | 1166 | TTGACTCAACACGGGGAAACTCACCAGGTCCAGACACAATAAGGATTGACAGATTGAGAG  | 1225 |
| Query | 1202 | CTCTTTCTTGATTTTGTGGGTGGTGGTGCATGGCCGTTCTTAGTTGGTGGAGTGATTTGT  | 1261 |
|       |      |                                                               |      |
| Sbjct | 1226 | CTCTTTCTTGATTTTGTGGGTGGTGGTGCATGGCCGTTCTTAGTTGGTGGAGTGATTTGT  | 1285 |





```

Query 1262 CTGCTTAATTGCGATAACGAACGAGACCTTAACCTACTAAATAGTGCTGCTAGCTTTTGC 1321
          |||
Sbjct 1286 CTGCTTAATTGCGATAACGAACGAGACCTTAACCTACTAAATAGTGCTGCTAGCTTTTGC 1345

Query 1322 TGGTATAGTCACTTCTTAGAGGGACTATCGATTTCAAGTCGATGGAAGTTTGAGGCAATA 1381
          |||
Sbjct 1346 TGGTATAGTCACTTCTTAGAGGGACTATCGATTTCAAGTCGATGGAAGTTTGAGGCAATA 1405

Query 1382 ACAGGTCTGTGATGCCCTTAGACGTTCTGGGCCGACGCGCGCTACACTGACGGAGCCAA 1441
          |||
Sbjct 1406 ACAGGTCTGTGATGCCCTTAGACGTTCTGGGCCGACGCGCGCTACACTGACGGAGCCAG 1465

Query 1442 CGAGTAT-TAACCTTGGCCGAGAGGTCTGGGAAATCTTGTGAAACTCCGTCGTGCTGGGG 1500
          |||
Sbjct 1466 CGAGT-TCTAACCTTGGCCGAGAGGTCTGGGTAATCTTGTGAAACTCCGTCGTGCTGGGG 1524

Query 1501 ATAGAGCATTGTAATTATTGCTCTTCAACGAGGAATTCCTAGTAAGCGCAAGTCATCAGC 1560
          |||
Sbjct 1525 ATAGAGCATTGTAATTATTGCTCTTCAACGAGGAATTCCTAGTAAGCGCAAGTCATCAGC 1584

Query 1561 TTGCGTTGATTACGTCCCTGCCCTTTGTACACACCGCCCGTCGCTACTACCGATTGAATG 1620
          |||
Sbjct 1585 TTGCGTTGATTACGTCCCTGCCCTTTGTACACACCGCCCGTCGCTACTACCGATTGAATG 1644

Query 1621 GCTTAGTGAGGCCTCCGGATTGGTTTAAAGAAGGGGGCAACTCCATCTTGAACCGAAAA 1680
          |||
Sbjct 1645 GCTTAGTGAGGCCTCCGGATTGGTTTAAAGAAGGGGGCAACTCCATCTTGAACCGAAAA 1704

Query 1681 GCTGGTCAAACCTTGGTCATTTAGAGGAAGTAAAAGTCGTAACAAGGTTTCCGTAGGTGAA 1740
          |||
Sbjct 1705 GCTAGTCAAACCTTGGTCATTTAGAGGAAGTAAAAGTCGTAACAAGGTTTCCGTAG-TGAA 1763

Query 1741 CCTGCGGAAGGATCATT 1758
          |||
Sbjct 1764 CCTGCGGAAGGATCATT 1781

```

```

>dbj|AB013509.1| Candida zeylanoides 18S rRNA gene, strain JCM 1627, partial
sequence
Length=1782

```

```

Score = 3157 bits (1709), Expect = 0.0
Identities = 1743/1758 (99%), Gaps = 7/1758 (0%)
Strand=Plus/Plus

```

```

Query 3 GCCATGCATGTCTAAGTATAAGCAATTTATACAGTGAAACTGCGAATGGCTCATTAAATC 62
          |||
Sbjct 30 GCCATGCATGTCTAAGTATAAGCAATTTATACAGTGAAACTGCGAATGGCTCATTAAATC 89

Query 63 AGTTATCGTTTATTTGATAGTACCTTTACTACTTGGATAACCGTGGTAATTCTAGAGCTA 122
          |||
Sbjct 90 AGTTATCGTTTATTTGATAGTACCTTTACTACTTGGATAACCGTGGTAATTCTAGAGCTA 149

Query 123 ATACATGCTAAAAATCCCGACTGTTTGAAGGGATGTATTTATTAGATAAAAAATCAATG 182
          |||
Sbjct 150 ATACATGCTAAAAATCCCGACT-TCTGGAAGGGATGTATTTATTAGATAAAAAATCAATG 208

Query 183 CTTTTCGGAGCTCTTTGATGATTCATAATAACTTTTCGAATCGCATGGCCTTGTGCTGGC 242
          |||
Sbjct 209 CTCTTCGGAGCTCTTTGATGATTCATAATAACTTTTCGAATCGCATGGCCTTGTGCTGGC 268

Query 243 GATGGTTCATTCAAATTTCTGCCCTATCAACTTTCGATGGTAGGATAGTGGCCTACCATG 302
          |||

```



|       |      |                                                               |      |
|-------|------|---------------------------------------------------------------|------|
| Sbjct | 269  | GATGGTTCATTCAAATTTCTGCCCTATCAACTTTCGATGGTAGGATAGTGGCCTACCATG  | 328  |
| Query | 303  | GTTTCAACGGGTAACGGGGAATAAGGGTTCGATTCCGGAGAGGGAGCCTGAGAAACGGCT  | 362  |
| Sbjct | 329  | GTTTCAACGGGTAACGGGGAATAAGGGTTCGATTCCGGAGAGGGAGCCTGAGAAACGGCT  | 388  |
| Query | 363  | ACCACATCCAAGGAAGGCAGCAGGCGCGCAAATTACCCAATCCCGACACGGGGAGGTAGT  | 422  |
| Sbjct | 389  | ACCACATCCAAGGAAGGCAGCAGGCGCGCAAATTACCCAATCCCGACACGGGGAGGTAGT  | 448  |
| Query | 423  | GACAATAAATAACGATACAGGGCCCTTTCGGGTCTTGTAATTGGAATGAGTACAATGTAA  | 482  |
| Sbjct | 449  | GACAATAAATAACGATACAGGG-CCTTTCGGGTCTTGTAATTGGAATGAGTACAATGTAA  | 507  |
| Query | 483  | ATACCTTAACGAGGAACAATTGGAGGGCAAGTCTGGTGCCAGCAGCCGCGGTAATTCCAG  | 542  |
| Sbjct | 508  | ATACCTTAACGAGGAACAATTGGAGGGCAAGTCTGGTGCCAGCAGCCGCGGTAATTCCAG  | 567  |
| Query | 543  | CTCCAATAGCGTATATTAAAGTTGTTGCAGTTAAAAAGCTCGTAGTTGAACCTTGGGCTT  | 602  |
| Sbjct | 568  | CTCCAATAGCGTATATTAAAGTTGTTGCAGTTAAAAAGCTCGTAGTTGAACCTTGGGCTT  | 627  |
| Query | 603  | GGTTGGCCGGTCCGCCTTTTTGGCGAGTACTGGACCCAACCGAGCCTTTCCTTCTGGCTA  | 662  |
| Sbjct | 628  | GGTTGGCCGGTCCG-CTTTATGGCGAGTACTGGACCCAACCGAGCCTTTCCTTCTGGCTA  | 686  |
| Query | 663  | ACCTTTCGCCCTTGTGGTGTGGGCGAACCAGGACTTTTACTTTGAAAAATTAGAGTGT    | 722  |
| Sbjct | 687  | ACCATTTCGCCCTTGTGGTGTGGGCGAACCAGGACTTTTACTTTGAAAAATTAGAGTGT   | 746  |
| Query | 723  | TCAAAGCAGGCCTTTGCTCGAATATATTAGCATGGAATAATAGAATAGGACGTTATGGTT  | 782  |
| Sbjct | 747  | TCAAAGCAGGCCTTTGCTCGAATATATTAGCATGGAATAATAGAATAGGACGTTATGGTT  | 806  |
| Query | 783  | CTATTTTGTGGTTTCTAGGACCATCGTAATGATTAATAGGGACGGTCGGGGGCATCAGT   | 842  |
| Sbjct | 807  | CTATTTTGTGGTTTCTAGGACCATCGTAATGATTAATAGGGACGGTCGGGGGCATCAGT   | 866  |
| Query | 843  | ATTCAGTTGTCAGAGGTGAAATTCTTGGA-TTACCTGAAGACTAACTACTGCGAAAGCAT  | 901  |
| Sbjct | 867  | ATTCAGTTGTCAGAGGTGAAATTCTTGGA-TTACCTGAAGACTAACTACTGCGAAAGCAT  | 925  |
| Query | 902  | TTGCCAAGGACGTTTTCAATTAATCAAGAACGAAAGTTAGGGGATCGAAGATGATCAGATA | 961  |
| Sbjct | 926  | TTGCCAAGGACGTTTTCAATTAATCAAGAACGAAAGTTAGGGGATCGAAGATGATCAGATA | 985  |
| Query | 962  | CCGTCGTAGTCTTAACCATAAACTATGCCGACTAGGGATCGGGTGTGTTCTtttttttGA  | 1021 |
| Sbjct | 986  | CCGTCGTAGTCTTAACCATAAACTATGCCGACTAGGGATCGGGTGTGTTCTTTTTTTGA   | 1045 |
| Query | 1022 | CGCACTCGGCACCTTACGAGAAATCAAAGTCTTTGGGTTCTGGGGGAGTATGGTCGCAA   | 1081 |
| Sbjct | 1046 | CGCACTCGGCACCTTACGAGAAATCAAAGTCTTTGGGTTCTGGGGGAGTATGGTCGCAA   | 1105 |
| Query | 1082 | GGCTGAAACTTAAAGGAATTGACGGAAGGGCACCACCAGGAGTGGAGCCTGCGGCTTAAT  | 1141 |
| Sbjct | 1106 | GGCTGAAACTTAAAGGAATTGACGGAAGGGCACCACCAGGAGTGGAGCCTGCGGCTTAAT  | 1165 |
| Query | 1142 | TTGACTCAACACGGGGAAACTCACCAGGTCCAGACACAATAAGGATTGACAGATTGAGAG  | 1201 |
| Sbjct | 1166 | TTGACTCAACACGGGGAAACTCACCAGGTCCAGACACAATAAGGATTGACAGATTGAGAG  | 1225 |
| Query | 1202 | CTCTTTCTTGATTTTGTGGGTGGTGGTGCATGGCCGTTCTTAGTTGGTGGAGTGATTTGT  | 1261 |

|       |      |                                                               |      |
|-------|------|---------------------------------------------------------------|------|
| Sbjct | 1226 | CTCTTTCTTGATTTTGTGGGTGGTGGTGCATGGCCGTTCTTAGTTGGTGGAGTGATTTGT  | 1285 |
| Query | 1262 | CTGCTTAATTGCGATAACGAACGAGACCTTAACCTACTAAATAGTGCTGCTAGCTTTTGC  | 1321 |
| Sbjct | 1286 | CTGCTTAATTGCGATAACGAACGAGACCTTAACCTACTAAATAGTGCTGCTAGCTTTTGC  | 1345 |
| Query | 1322 | TGGTATAGTCACTTCTTAGAGGGACTATCGATTTCAAGTCGATGGAAGTTTGAGGCAATA  | 1381 |
| Sbjct | 1346 | TGGTATAGTCACTTCTTAGAGGGACTATCGATTTCAAGTCGATGGAAGTTTGAGGCAATA  | 1405 |
| Query | 1382 | ACAGGTCTGTGATGCCCTTAGACGTTCTGGGCCGCACGCGCGCTACACTGACGGAGCCAA  | 1441 |
| Sbjct | 1406 | ACAGGTCTGTGATGCCCTTAGACGTTCTGGGCCGCACGCGCGCTACACTGACGGAGCCAG  | 1465 |
| Query | 1442 | CGAGTAT-TAACCTTGGCCGAGAGGTCTGGGAAATCTTGTGAAACTCCGTCGTGCTGGGG  | 1500 |
| Sbjct | 1466 | CGAGT-TCTAACCTTGGCCGAGAGGTCTGGGTAATCTTGTGAAACTCCGTCGTGCTGGGG  | 1524 |
| Query | 1501 | ATAGAGCATTGTAATTATTGCTCTTCAACGAGGAATTCCTAGTAAGCGCAAGTCATCAGC  | 1560 |
| Sbjct | 1525 | ATAGAGCATTGTAATTATTGCTCTTCAACGAGGAATTCCTAGTAAGCGCAAGTCATCAGC  | 1584 |
| Query | 1561 | TTGCGTTGATTACGTCCCTGCCCTTTGTACACACCGCCCGTCGCTACTACCGATTGAATG  | 1620 |
| Sbjct | 1585 | TTGCGTTGATTACGTCCCTGCCCTTTGTACACACCGCCCGTCGCTACTACCGATTGAATG  | 1644 |
| Query | 1621 | GCTTAGTGAGGCCTCCGGATTGGTTTAAAGAAGGGGGCAACTCCATCTTGAACCGAAAA   | 1680 |
| Sbjct | 1645 | GCTTAGTGAGGCCTCCGGATTGGTTTAAAGAAGGGGGCAACTCCATCTTGAACCGAAAA   | 1704 |
| Query | 1681 | GCTGGTCAAACCTTGGTCATTTAGAGGAAGTAAAAGTCGTAACAAGGTTTCCGTAGGTGAA | 1740 |
| Sbjct | 1705 | GCTAGTCAAACCTTGGTCATTTAGAGGAAGTAAAAGTCGTAACAAGGTTTCCGTAGGTGAA | 1764 |
| Query | 1741 | CCTGCGGAAGGATCATT                                             | 1758 |
| Sbjct | 1765 | CCTGCGGAAGGATCATT                                             | 1782 |

>gb|DQ534402.1| *Debaryomyces hansenii* strain hcx-1 18S ribosomal RNA gene, partial sequence  
Length=1738

Score = 3153 bits (1707), Expect = 0.0  
Identities = 1717/1721 (99%), Gaps = 4/1721 (0%)  
Strand=Plus/Plus

|       |     |                                                              |     |
|-------|-----|--------------------------------------------------------------|-----|
| Query | 3   | GCCATGCATGTCTAAGTATAAGCAATTTATACAGTGAAACTGCGAATGGCTCATTAAATC | 62  |
| Sbjct | 15  | GCC-TGCATGTCTAAGTATAAGCAATTTATACAGTGAAACTGCGAATGGCTCATTAAATC | 73  |
| Query | 63  | AGTTATCGTTTATTTGATAGTACCTTTACTACTTGGATAACCGTGGTAATTCTAGAGCTA | 122 |
| Sbjct | 74  | AGTTATCGTTTATTTGATAGTACCTTTACTACTTGGATAACCGTGGTAATTCTAGAGCTA | 133 |
| Query | 123 | ATACATGCTAAAAATCCCGACTGTTTGAAGGGATGTATTTATTAGATAAAAAATCAATG  | 182 |
| Sbjct | 134 | ATACATGCTAAAAATCCCGACTGTTTGAAGGGATGTATTTATTAGATAAAAAATCAATG  | 193 |
| Query | 183 | CTTTTCGGAGCTCTTTGATGATTCATAATAACTTTTCGAATCGCATGGCCTTGTGCTGGC | 242 |
| Sbjct | 194 | CTTTTCGGAGCTCTTTGATGATTCATAATAACTTTTCGAATCGCATGGCCTTGTGCTGGC | 253 |
| Query | 243 | GATGGTTCATTCAAATTTCTGCCCTATCAACTTTCGATGGTAGGATAGTGGCCTACCATG | 302 |

|       |      |                                                                  |      |
|-------|------|------------------------------------------------------------------|------|
| Sbjct | 254  | <br>GATGGTTCATTCAAATTTCTGCCCTATCAACTTTCGATGGTAGGATAGTGGCCTACCATG | 313  |
| Query | 303  | GTTTCAACGGGTAACGGGAATAAGGGTTCGATTCCGGAGAGGGAGCCTGAGAAACGGCT      | 362  |
| Sbjct | 314  | <br>GTTTCAACGGGTAACGGGAATAAGGGTTCGATTCCGGAGAGGGAGCCTGAGAAACGGCT  | 373  |
| Query | 363  | ACCACATCCAAGGAAGGCAGCAGGCGCGCAAATTACCCAATCCCGACACGGGGAGGTAGT     | 422  |
| Sbjct | 374  | <br>ACCACATCCAAGGAAGGCAGCAGGCGCGCAAATTACCCAATCCCGACACGGGGAGGTAGT | 433  |
| Query | 423  | GACAATAAATAACGATACAGGGCCCTTTCGGGTCTTGTAATTGGAATGAGTACAATGTAA     | 482  |
| Sbjct | 434  | <br>GACAATAAATAACGATACAGGGCCCTTTCGGGTCTTGTAATTGGAATGAGTACAATGTAA | 493  |
| Query | 483  | ATACCTTAACGAGGAACAATTGGAGGGCAAGTCTGGTGCCAGCAGCCGCGGTAATTCCAG     | 542  |
| Sbjct | 494  | <br>ATACCTTAACGAGGAACAATTGGAGGGCAAGTCTGGTGCCAGCAGCCGCGGTAATTCCAG | 553  |
| Query | 543  | CTCCAATAGCGTATATTAAGTTGTTGCAGTTAAAAAGCTCGTAGTTGAACCTTGGGCTT      | 602  |
| Sbjct | 554  | <br>CTCCAATAGCGTATATTAAGTTGTTGCAGTTAAAAAGCTCGTAGTTGAACCTTGGGCTT  | 613  |
| Query | 603  | GGTTGGCCGGTCCGCCTTTTTGGCGAGTACTGGACCCAACCGAGCCTTTCCTTCTGGCTA     | 662  |
| Sbjct | 614  | <br>GGTTGGCCGGTCCGCCTTTTTGGCGAGTACTGGACCCAACCGAGCCTTTCCTTCTGGCTA | 673  |
| Query | 663  | ACCTTTCGCCCTTGTGGTGTGGCGAACCAGGACTTTTACTTTGAAAAATTAGAGTGT        | 722  |
| Sbjct | 674  | <br>ACCTTTCGCCCTTGTGGTGTGGCGAACCAGGACTTTTACTTTGAAAAATTAGAGTGT    | 733  |
| Query | 723  | TCAAAGCAGGCCTTGTCTGAATATATTAGCATGGAATAATAGAATAGGACGTTATGGTT      | 782  |
| Sbjct | 734  | <br>TCAAAGCAGGCCTTGTCTGAATATATTAGCATGGAATAATAGAATAGGACGTTATGGTT  | 793  |
| Query | 783  | CTATTTTGTGGTTTCTAGGACCATCGTAATGATTAATAGGGACGGTCGGGGGCATCAGT      | 842  |
| Sbjct | 794  | <br>CTATTTTGTGGTTTCTAGGACCATCGTAATGATTAATAGGGACGGTCGGGGGCATCAGT  | 853  |
| Query | 843  | ATTCAGTTGTCAGAGGTGAAATTCTTGGATT-ACCTGAAGACTAACTACTGCGAAAGCAT     | 901  |
| Sbjct | 854  | <br>ATTCAGTTGTCAGAGGTGAAATTCTTGGATTAC-TGAAGACTAACTACTGCGAAAGCAT  | 912  |
| Query | 902  | TTGCCAAGGACGTTTTCATTAATCAAGAACGAAAGTTAGGGGATCGAAGATGATCAGATA     | 961  |
| Sbjct | 913  | <br>TTGCCAAGGACGTTTTCATTAATCAAGAACGAAAGTTAGGGGATCGAAGATGATCAGATA | 972  |
| Query | 962  | CCGTCGTAGTCTTAACCATAAACTATGCCGACTAGGGATCGGGTGTGTTCTtttttttGA     | 1021 |
| Sbjct | 973  | <br>CCGTCGTAGTCTTAACCATAAACTATGCCGACTAGGGATCGGGTGTGTTCTTTTTTTGA  | 1032 |
| Query | 1022 | CGCACTCGGCACCTTACGAGAAATCAAAGTCTTTGGGTTCTGGGGGAGTATGGTCGCAA      | 1081 |
| Sbjct | 1033 | <br>CGCACTCGGCACCTTACGAGAAATCAAAGTCTTTGGGTTCTGGGGGAGTATGGTCGCAA  | 1092 |
| Query | 1082 | GGCTGAAACTTAAAGGAATTGACGGAAGGGCACCACCAGGAGTGGAGCCTGCGGCTTAAT     | 1141 |
| Sbjct | 1093 | <br>GGCTGAAACTTAAAGGAATTGACGGAAGGGCACCACCAGGAGTGGAGCCTGCGGCTTAAT | 1152 |
| Query | 1142 | TTGACTCAACACGGGGAAACTCACCAGGTCCAGACACAATAAGGATTGACAGATTGAGAG     | 1201 |
| Sbjct | 1153 | <br>TTGACTCAACACGGGGAAACTCACCAGGTCCAGACACAATAAGGATTGACAGATTGAGAG | 1212 |
| Query | 1202 | CTCTTCTTGATTTTGTGGGTGGTGGTGCATGGCCGTTCTTAGTTGGTGGAGTGATTTGT      | 1261 |

|       |      |                                                                   |      |
|-------|------|-------------------------------------------------------------------|------|
| Sbjct | 1213 | <br>CTCTTTCTTGATTTTGTGGGTGGTGGTGCATGGCCGTTCTTAGTTGGTGGAGTGATTTGT  | 1272 |
| Query | 1262 | CTGCTTAATTGCGATAACGAACGAGACCTTAACCTACTAAATAGTGCTGCTAGCTTTTGC      | 1321 |
| Sbjct | 1273 | <br>CTGCTTAATTGCGATAACGAACGAGACCTTAACCTACTAAATAGTGCTGCTAGCTTTTGC  | 1332 |
| Query | 1322 | TGGTATAGTCACTTCTTAGAGGGACTATCGATTTCAAGTCGATGGAAGTTTGAGGCAATA      | 1381 |
| Sbjct | 1333 | <br>TGGTATAGTCACTTCTTAGAGGGACTATCGATTTCAAGTCGATGGAAGTTTGAGGCAATA  | 1392 |
| Query | 1382 | ACAGGTCTGTGATGCCCTTAGACGTTCTGGGCCGACGCGCGCTACACTGACGGAGCCAA       | 1441 |
| Sbjct | 1393 | <br>ACAGGTCTGTGATGCCCTTAGACGTTCTGGGCCGACGCGCGCTACACTGACGGAGCCAA   | 1452 |
| Query | 1442 | CGAGTATTAACCTTGGCCGAGAGGTCTGGGAAATCTTGTGAAACTCCGTCGTGCTGGGGA      | 1501 |
| Sbjct | 1453 | <br>CGAGTATTAACCTTGGCCGAGAGGTCTGGGAAATCTTGTGAAACTCCGTCGTGCTGGGGA  | 1512 |
| Query | 1502 | TAGAGCATTGTAATTATTGCTCTTCAACGAGGAATTCCTAGTAAGCGCAAGTCATCAGCT      | 1561 |
| Sbjct | 1513 | <br>TAGAGCATTGTAATTATTGCTCTTCAACGAGGAATTCCTAGTAAGCGCAAGTCATCAGCT  | 1572 |
| Query | 1562 | TGCGTTGATTACGTCCCTGCCCTTTGTACACACCGCCCGTCGCTACTACCGATTGAATGG      | 1621 |
| Sbjct | 1573 | <br>TGCGTTGATTACGTCCCTGCCCTTTGTACACACCGCCCGTCGCTACTACCGATTGAATGG  | 1632 |
| Query | 1622 | CTTAGTGAGGCCTCCGGATTGGTTTTAAAGAAGGGGGCAACTCCATCTTGGAACCGAAAAG     | 1681 |
| Sbjct | 1633 | <br>CTTAGTGAGGCCTCCGGATTGGTTTTAAAGAAGGGGGCAACTCCATCTTGGAACCGAAAAG | 1692 |
| Query | 1682 | CTGGTCAAACCTTGGTCATTTAGAGGAAGTAAAAGTCGTAAC                        | 1722 |
| Sbjct | 1693 | <br>CTGGTCAAACCTTGGTCATTTAGAGGAAGTAAAAGTCG-AAC                    | 1732 |

>dbj|AB054261.1| Debaryomyces maramus gene for 18S rRNA, partial sequence,  
strain:JCM  
1528  
Length=1752

Score = 3153 bits (1707), Expect = 0.0  
Identities = 1725/1734 (99%), Gaps = 3/1734 (0%)  
Strand=Plus/Plus

|       |     |                                                                   |     |
|-------|-----|-------------------------------------------------------------------|-----|
| Query | 3   | GCCATGCATGTCTAAGTATAAGCAATTTATACAGTGAAACTGCGAATGGCTCATTAAATC      | 62  |
| Sbjct | 21  | <br>GCCATGCATGTCTAAGTATAAGCAATTTATACAGTGAAACTGCGAATGGCTCATTAAATC  | 80  |
| Query | 63  | AGTTATCGTTTATTTGATAGTACCTTTACTACTTGGATAACCGTGGTAATTCTAGAGCTA      | 122 |
| Sbjct | 81  | <br>AGTTATCGTTTATTTGATAGTACCTTTACTACTTGGATAACCGTGGTAATTCTAGAGCTA  | 140 |
| Query | 123 | ATACATGCTAAAAATCCCGACTGTTTGAAGGGATGTATTTATTAGATAAAAAATCAATG       | 182 |
| Sbjct | 141 | <br>ATACATGCTAAAAATCCCGACTGTTTGAAGGGATGTATTTATTAGATAAAAAATCAATG   | 200 |
| Query | 183 | CTTTTCGGAGCTCTTTGATGATTCATAATAACTTTTCGAATCGCATGGCCTTGTGCTGGC      | 242 |
| Sbjct | 201 | <br>CTTTTCGGAGCTCTTTGATGATTCATAATAACTTTTCGAATCGCATGGCCTTGTGCTGGC  | 260 |
| Query | 243 | GATGGTTCATTCAAATTTCTGCCCTATCAACTTTTCGATGGTAGGATAGTGGCCTACCATG     | 302 |
| Sbjct | 261 | <br>GATGGTTCATTCAAATTTCTGCCCTATCAACTTTTCGATGGTAGGATAGTGGCCTACCATG | 320 |







```

Query 1320 GCTGGTATAGTCACTTCTTAGAGGGACTATCGATTTCAAGTCGATGGAAGTTTGAGGCAA 1379
          |||
Sbjct 1345 GCTGGTATAGTCACTTCTTAGAGGGACTATCGATTTCAAGTCGATGGAAGTTTGAGGCAA 1404

Query 1380 TAACAGGTCTGTGATGCCCTTAGACGTTCTGGGCCGCACGCGCGCTACACTGACGGAGCC 1439
          |||
Sbjct 1405 TAACAGGTCTGTGATGCCCTTAGACGTTCTGGGCCGCACGCGCGCTACACTGACGGAGCC 1464

Query 1440 AACGAGTATTAACCTTGGCCGAGAGGTCTGGGAAATCTTGTGAAACTCCGTCGTGCTGGG 1499
          |
Sbjct 1465 AGCGAGTATTAACCTTGGCCGAGAGGTCTGGGAAATCTTGTGAAACTCCGTCGTGCTGGG 1524

Query 1500 GATAGAGCATTGTAATTATTGCTCTTCAACGAGGAATTCTTAGTAAGCGCAAGTCATCAG 1559
          |||
Sbjct 1525 GATAGAGCATTGTAATTATTGCTCTTCAACGAGGAATTCTTAGTAAGCGCAAGTCATCAG 1584

Query 1560 CTTGCGTTGATTACGTCCCTGCCCTTTGTACACACCGCCCGTCGCTACTACCGATTGAAT 1619
          |||
Sbjct 1585 CTTGCGTTGATTACGTCCCTGCCCTTTGTACACACCGCCCGTCGCTACTACCGATTGAAT 1644

Query 1620 GGCTTAGTGAGGCCTCCGGATTGGTTTAAAGAAGGGGGCAACTCCATCTTGGAACCGAAA 1679
          |||
Sbjct 1645 GGCTTAGTGAGGCCTCCGGATTGGTTTAAAGAAGGGGGCAACTCCATCTTGGAACCGAAA 1704

Query 1680 AGCTGGTCAAACCTTGGTCATTTAGAGGAAGTAAAAGTCGTAACAAGGTTTCCGTAGGTGA 1739
          |||
Sbjct 1705 AGCTGGTCAAACCTTGGTCATTTAGAGGAAGTAAAAGTCGTAACAAGGTTTCCGTAGGTGA 1764

Query 1740 ACCTG 1744
          |||
Sbjct 1765 ACCTG 1769

```

```

>dbj|AB054272.1| Debaryomyces coudertii gene for 18S rRNA, partial sequence,
strain:JCM
2387
Length=1750

```

```

Score = 3151 bits (1706), Expect = 0.0
Identities = 1725/1734 (99%), Gaps = 5/1734 (0%)
Strand=Plus/Plus

```

```

Query 3 GCCATGCATGTCTAAGTATAAGCAATTTATACAGTGAAACTGCGAATGGCTCATTAAATC 62
          |||
Sbjct 21 GCCATGCATGTCTAAGTATAAGCAATTTATACAGTGAAACTGCGAATGGCTCATTAAATC 80

Query 63 AGTTATCGTTTATTTGATAGTACCTTTACTACTTGGATAACCGTGGTAATTCTAGAGCTA 122
          |||
Sbjct 81 AGTTATCGTTTATTTGATAGTACCTTTACTACTTGGATAACCGTGGTAATTCTAGAGCTA 140

Query 123 ATACATGCTAAAAATCCCGACTGTTTGAAGGGATGTATTTATTAGATAAAAAATCAATG 182
          |||
Sbjct 141 ATACATGCTAAAAATCCCGACTGTTTGAAGGGATGTATTTATTAGATAAAAAATCAATG 200

Query 183 CTTTTCGGAGCTCTTTGATGATTCATAATAACTTTTTCGAATCGCATGGCCTTGTGCTGGC 242
          |||
Sbjct 201 CTTTTCGGAGCTCTTTGATGATTCATAATAACTTTTTCGAATCGCATGGCCTTGTGCTGGC 260

Query 243 GATGGTTCATTCAAATTTCTGCCCTATCAACTTTTCGATGGTAGGATAGTGGCCTACCATG 302
          |||
Sbjct 261 GATGGTTCATTCAAATTTCTGCCCTATCAACTTTTCGATGGTAGGATAGTGGCCTACCATG 320

Query 303 GTTTCAACGGGTAACGGGGAATAAGGGTTCGATTCGGAGAGGGAGCCTGAGAAACGGCT 362

```



|       |      |                                                                  |      |
|-------|------|------------------------------------------------------------------|------|
| Sbjct | 321  | <br>GTTTCAACGGGTAACGGGAATAAGGGTTCGATTCCGGAGAGGGAGCCTGAGAAACGGCT  | 380  |
| Query | 363  | ACCACATCCAAGGAAGGCAGCAGGCGCAAATTACCCAATCCCACACGGGGAGGTAGT        | 422  |
| Sbjct | 381  | <br>ACCACATCCAAGGAAGGCAGCAGGCGCAAATTACCCAATCCCACACGGGGAGGTAGT    | 440  |
| Query | 423  | GACAATAAATAACGATACAGGGCCCTTTCGGGTCTTGTAATTGGAATGAGTACAATGTAA     | 482  |
| Sbjct | 441  | <br>GACAATAAATAACGATACAGGGCCC-TTCGGGTCTTGTAATTGGAATGAGTACAATGTAA | 499  |
| Query | 483  | ATACCTTAACGAGGAACAATTGGAGGGCAAGTCTGGTGCCAGCAGCCGCGGTAATTCCAG     | 542  |
| Sbjct | 500  | <br>ATACCTTAACGAGGAACAATTGGAGGGCAAGTCTGGTGCCAGCAGCCGCGGTAATTCCAG | 559  |
| Query | 543  | CTCCAATAGCGTATATTAAAGTTGTTGCAGTTAAAAAGCTCGTAGTTGAACCTTGGGCTT     | 602  |
| Sbjct | 560  | <br>CTCCAATAGCGTATATTAAAGTTGTTGCAGTTAAAAAGCTCGTAGTTGAACCTTGGGCTT | 619  |
| Query | 603  | GGTTGGCCGGTCCGCCTTTTTGGCGAGTACTGGACCCAACCGAGCCTTTCCTTCTGGCTA     | 662  |
| Sbjct | 620  | <br>GGTTGGCCGGTCCGCCTTTTTGGCGAGTACTGGACCCAACCGAGCCTTTCCTTCTGGCTA | 679  |
| Query | 663  | ACCTTTCGCCCTTGTGGTGTGGGCGAACCAGGACTTTTACTTTGAAAAATTAGAGTGT       | 722  |
| Sbjct | 680  | <br>ACCTTTCGCCCTTGTGGTGTGGGCGAACCAGGACTTTTACTTTGAAAAATTAGAGTGT   | 739  |
| Query | 723  | TCAAAGCAGGCCCTTGCTCGAATATATTAGCATGGAATAATAGAATAGGACGTTATGGTT     | 782  |
| Sbjct | 740  | <br>TCAAAGCAGGCC-TTGCTCGAATATATTAGCATGGAATAATAGAATAGGACGTTATGGTT | 798  |
| Query | 783  | CTATTTTGTGGTTTCTAGGACCATCGTAATGATTAATAGGGACGGTCGGGGGCATCAGT      | 842  |
| Sbjct | 799  | <br>CTATTTTGTGGTTTCTAGGACCATCGTAATGATTAATAGGGACGGTCGGGGGCATCAGT  | 858  |
| Query | 843  | ATTCAGTTGTCAGAGGTGAAATTCTTGGA-TTACCTGAAGACTAACTACTGCGAAAGCAT     | 901  |
| Sbjct | 859  | <br>ATTCAGTTGTCAGAGGTGAAATTCTTGGA-TTACCTGAAGACTAACTACTGCGAAAGCAT | 917  |
| Query | 902  | TTGCCAAGGACGTTTTCATTAATCAAGAACGAAAGTTAGGGGATCGAAGATGATCAGATA     | 961  |
| Sbjct | 918  | <br>TTGCCAAGGACGTTTTCATTAATCAAGAACGAAAGTTAGGGGATCGAAGATGATCAGATA | 977  |
| Query | 962  | CCGTCGTAGTCTTAACCATAAACTATGCCGACTAGGGATCGGGTGTGTTCTttttttGA      | 1021 |
| Sbjct | 978  | <br>CCGTCGTAGTCTTAACCATAAACTATGCCGACTAGGGATCGGGTGTGTTCTTTTTTTGA  | 1037 |
| Query | 1022 | CGCACTCGGCACCTTACGAGAAATCAAAGTCTTTGGGTTCTGGGGGAGTATGGTCGCAA      | 1081 |
| Sbjct | 1038 | <br>CGCACTCGGCACCTTACGGGAAATCAAAGTCTTTGGGTTCTGGGGGAGTATGGTCGCAA  | 1097 |
| Query | 1082 | GGCTGAAACTTAAAGGAATTGACGGAAGGGCACCACCAGGAGTGGAGCCTGCGGCTTAAT     | 1141 |
| Sbjct | 1098 | <br>GGCTGAAACTTAAAGGAATTGACGGAAGGGCACCACCAGGAGTGG-GACTGCGGCTTAAT | 1156 |
| Query | 1142 | TTGACTCAACACGGGGAAACTCACCAGGTCCAGACACAATAAGGATTGACAGATTGAGAG     | 1201 |
| Sbjct | 1157 | <br>TTGACTCAACACGGGGAAACTCACCAGGTCCAGACACAATAAGGATTGACAGATTGAGAG | 1216 |
| Query | 1202 | CTCTTTCTTGATTTTGTGGGTGGTGGTGCATGGCCGTTCTTAGTTGGTGGAGTGATTTGT     | 1261 |
| Sbjct | 1217 | <br>CTCTTTCTTGATTTTGTGGGTGGTGGTGCATGGCCGTTCTTAGTTGGTGGAGTGATTTGT | 1276 |
| Query | 1262 | CTGCTTAATTGCGATAACGAACGAGACCTTAACCTACTAAATAGTGCTGCTAGCTTTTGC     | 1321 |

|       |      |                                                                   |      |
|-------|------|-------------------------------------------------------------------|------|
| Sbjct | 1277 | <br>CTGCTTAATTNNGATAACGAACGAGACCTTAACCTACTAAATAGTGCTGCTAGCTTTTGC  | 1336 |
| Query | 1322 | TGGTATAGTCACTTCTTAGAGGGACTATCGATTTCAAGTTCGATGGAAGTTTGAGGCAATA     | 1381 |
| Sbjct | 1337 | <br>TGGTATAGTCACTTCTTAGAGGGACTATCGATTTCAAGTTCGATGGAAGTTTGAGGCAATA | 1396 |
| Query | 1382 | ACAGGTCTGTGATGCCCTTAGACGTTCTGGGCCGCACGCGCGCTACACTGACGGAGCCAA      | 1441 |
| Sbjct | 1397 | <br>ACAGGTCTGTGATGCCCTTAGACGTTCTGGGCCGCACGCGCGCTACACTGACGGAGCCAA  | 1456 |
| Query | 1442 | CGAGTATTAACCTTGGCCGAGAGGTCTGGGAAATCTTGTGAAACTCCGTCGTGCTGGGGA      | 1501 |
| Sbjct | 1457 | <br>CGAGTATTAACCTTGGCCGAGAGGTCTGGGAAATCTTGTGAAACTCCGTCGTGCTGGGGA  | 1516 |
| Query | 1502 | TAGAGCATTGTAATTATTGCTCTTCAACGAGGAATTCCTAGTAAGCGCAAGTCATCAGCT      | 1561 |
| Sbjct | 1517 | <br>TAGAGCATTGTAATTATTGCTCTTCAACGAGGAATTCCTAGTAAGCGCAAGTCATCAGCT  | 1576 |
| Query | 1562 | TGCGTTGATTACGTCCCTGCCCTTTGTACACACCGCCCGTCGCTACTACCGATTGAATGG      | 1621 |
| Sbjct | 1577 | <br>TGCGTTGATTACGTCCCTGCCCTTTGTACACACCGCCCGTCGCTACTACCGATTGAATGG  | 1636 |
| Query | 1622 | CTTAGTGAGGCCTCCGGATTGGTTTAAAGAAGGGGGCAACTCCATCTTGGAACCGAAAAG      | 1681 |
| Sbjct | 1637 | <br>CTTAGTGAGGCCTCCGGATTGGTTTAAAGAAGGGGGCAACTCCATCTTGGAACCGAAAAG  | 1696 |
| Query | 1682 | CTGGTCAAACCTTGGTCATTTAGAGGAAAGTAAAAGTCGTAACAAGGTTTCCGTAG          | 1735 |
| Sbjct | 1697 | <br>CTGGTCAAACCTTGGTCATTTAGAGGAAAGTAAAAGTCGTAACAAGGTTTCCGTAG      | 1750 |

>dbj|AB013562.1| Candida beechii 18S rRNA gene, strain JCM 1802, partial sequence  
Length=1781

Score = 3151 bits (1706), Expect = 0.0  
Identities = 1742/1758 (99%), Gaps = 8/1758 (0%)  
Strand=Plus/Plus

|       |     |                                                                   |     |
|-------|-----|-------------------------------------------------------------------|-----|
| Query | 3   | GCCATGCATGTCTAAGTATAAGCAATTTATACAGTGAAACTGCGAATGGCTCATTAAATC      | 62  |
| Sbjct | 30  | <br>GCCATGCATGTCTAAGTATAAGCAATTTATACAGTGAAACTGCGAATGGCTCATTAAATC  | 89  |
| Query | 63  | AGTTATCGTTTATTTGATAGTACCTTTACTACTTGGATAACCGTGGTAATTCTAGAGCTA      | 122 |
| Sbjct | 90  | <br>AGTTATCGTTTATTTGATAGTACCTTTACTACTTGGATAACCGTGGTAATTCTAGAGCTA  | 149 |
| Query | 123 | ATACATGCTAAAAATCCCGACTGTTTGGAAAGGGATGTATTTATTAGATAAAAAATCAATG     | 182 |
| Sbjct | 150 | <br>ATACATGCTAAAAATCCCGACT-TCTGGAAGGGATGTATTTATTAGATAAAAAATCAATG  | 208 |
| Query | 183 | CTTTTCGGAGCTCTTTGATGATTCATAATAACTTTTCGAATCGCATGGCCTTGTGCTGGC      | 242 |
| Sbjct | 209 | <br>C-TTTC-GAGCTCTTTGATGATTCATAATAACTTTTCGAATCGCATGGCCTTGTGCTGGC  | 266 |
| Query | 243 | GATGGTTCATTCAAATTTCTGCCCTATCAACTTTTCGATGGTAGGATAGTGGCCTACCATG     | 302 |
| Sbjct | 267 | <br>GATGGTTCATTCAAATTTCTGCCCTATCAACTTTTCGATGGTAGGATAGTGGCCTACCATG | 326 |
| Query | 303 | GTTTCAACGGGTAACGGGAATAAGGGTTCGATTCGGAGAGGGAGCCTGAGAAACGGCT        | 362 |
| Sbjct | 327 | <br>GTTTCAACGGGTAACGGGAATAAGGGTTCGATTCGGAGAGGGAGCCTGAGAAACGGCT    | 386 |
| Query | 363 | ACCACATCCAAGGAAGGCAGCAGGCGCAAATTACCCAATCCCGACACGGGGAGGTAGT        | 422 |

|       |      |                                                                  |      |
|-------|------|------------------------------------------------------------------|------|
| Sbjct | 387  | <br>ACCACATCCAAGGAAGGCAGCAGGCGCAAATTACCCAATCCCACACGGGGAGGTAGT    | 446  |
| Query | 423  | GACAATAAATAACGATACAGGGCCCTTTCGGGTCTTGTAATTGGAATGAGTACAATGTAA     | 482  |
| Sbjct | 447  | <br>GACAATAAATAACGATACAGGGCCCTTTCGGGTCTTGTAATTGGAATGAGTACAATGTAA | 506  |
| Query | 483  | ATACCTTAACGAGGAACAATTGGAGGGCAAGTCTGGTGCCAGCAGCCGCGGTAATTCCAG     | 542  |
| Sbjct | 507  | <br>ATACCTTAACGAGGAACAATTGGAGGGCAAGTCTGGTGCCAGCAGCCGCGGTAATTCCAG | 566  |
| Query | 543  | CTCCAATAGCGTATATTAAAGTTGTTGCAGTTAAAAAGCTCGTAGTTGAACCTTGGGCTT     | 602  |
| Sbjct | 567  | <br>CTCCAATAGCGTATATTAAAGTTGTTGCAGTTAAAAAGCTCGTAGTTGAACCTTGGGCTT | 626  |
| Query | 603  | GGTTGGCCGGTCCGCCTTTTTGGCGAGTACTGGACCCAACCGAGCCTTTCCTTCTGGCTA     | 662  |
| Sbjct | 627  | <br>GGTTGGCCGGTCCG-CTTTATGGCGAGTACTGGACCCAACCGAGCCTTTCCTTCTGGCTA | 685  |
| Query | 663  | ACCTTTCGCCCTTGTGGTGTGGCGAACCAGGACTTTTACTTTGAAAAATTAGAGTGT        | 722  |
| Sbjct | 686  | <br>ACCATTTCGCCCTTGTGGTGTGGCGAACCAGGACTTTTACTTTGAAAAATTAGAGTGT   | 745  |
| Query | 723  | TCAAAGCAGGCCTTTGCTCGAATATATTAGCATGGAATAATAGAATAGGACGTTATGGTT     | 782  |
| Sbjct | 746  | <br>TCAAAGCAGGCCTTTGCTCGAATATATTAGCATGGAATAATAGAATAGGACGTTATGGTT | 805  |
| Query | 783  | CTATTTTGTGGTTTCTAGGACCATCGTAATGATTAATAGGGACGGTCGGGGGCATCAGT      | 842  |
| Sbjct | 806  | <br>CTATTTTGTGGTTTCTAGGACCATCGTAATGATTAATAGGGACGGTCGGGGGCATCAGT  | 865  |
| Query | 843  | ATTCAGTTGTCAGAGGTGAAATTCTTGGA-TTACCTGAAGACTAACTACTGCGAAAGCAT     | 901  |
| Sbjct | 866  | <br>ATTCAGTTGTCAGAGGTGAAATTCTTGGA-TTACCTGAAGACTAACTACTGCGAAAGCAT | 924  |
| Query | 902  | TTGCCAAGGACGTTTTCATTAATCAAGAACGAAAGTTAGGGGATCGAAGATGATCAGATA     | 961  |
| Sbjct | 925  | <br>TTGCCAAGGACGTTTTCATTAATCAAGAACGAAAGTTAGGGGATCGAAGATGATCAGATA | 984  |
| Query | 962  | CCGTCGTAGTCTTAACCATAAACTATGCCGACTAGGGATCGGGTGTGTTCTtttttttGA     | 1021 |
| Sbjct | 985  | <br>CCGTCGTAGTCTTAACCATAAACTATGCCGACTAGGGATCGGGTGTGTTCTTTTTTTGA  | 1044 |
| Query | 1022 | CGCACTCGGCACCTTACGAGAAATCAAAGTCTTTGGGTTCTGGGGGAGTATGGTCGCAA      | 1081 |
| Sbjct | 1045 | <br>CGCACTCGGCACCTTACGAGAAATCAAAGTCTTTGGGTTCTGGGGGAGTATGGTCGCAA  | 1104 |
| Query | 1082 | GGCTGAAACTTAAAGGAATTGACGGAAGGGCACCACCAGGAGTGGAGCCTGCGGCTTAAT     | 1141 |
| Sbjct | 1105 | <br>GGCTGAAACTTAAAGGAATTGACGGAAGGGCACCACCAGGAGTGGAGCCTGCGGCTTAAT | 1164 |
| Query | 1142 | TTGACTCAACACGGGGAAACTCACCAGGTCCAGACACAATAAGGATTGACAGATTGAGAG     | 1201 |
| Sbjct | 1165 | <br>TTGACTCAACACGGGGAAACTCACCAGGTCCAGACACAATAAGGATTGACAGATTGAGAG | 1224 |
| Query | 1202 | CTCTTTCTTGATTTTGTGGGTGGTGGTGCATGGCCGTTCTTAGTTGGTGGAGTGATTTGT     | 1261 |
| Sbjct | 1225 | <br>CTCTTTCTTGATTTTGTGGGTGGTGGTGCATGGCCGTTCTTAGTTGGTGGAGTGATTTGT | 1284 |
| Query | 1262 | CTGCTTAATTGCGATAACGAACGAGACCTTAACCTACTAAATAGTGCTGCTAGCTTTTGC     | 1321 |
| Sbjct | 1285 | <br>CTGCTTAATTGCGATAACGAACGAGACCTTAACCTACTAAATAGTGCTGCTAGCTTTTGC | 1344 |
| Query | 1322 | TGGTATAGTCACTTCTTAGAGGGACTATCGATTTCAAGTCGATGGAAGTTTGGAGCAATA     | 1381 |

|       |      |                                                                   |      |
|-------|------|-------------------------------------------------------------------|------|
| Sbjct | 1345 | <br>TGGTATAGTCACTTCTTAGAGGGACTATCGATTTCAAGTCGATGGAAGTTTGAGGCAATA  | 1404 |
| Query | 1382 | ACAGGTCTGTGATGCCCTTAGACGTTCTGGGCCGCACGCGCTACACTGACGGAGCCAA        | 1441 |
| Sbjct | 1405 | <br>ACAGGTCTGTGATGCCCTTAGACGTTCTGGGCCGCACGCGCTACACTGACGGAGCCAG    | 1464 |
| Query | 1442 | CGAGTAT-TAACCTTGGCCGAGAGGTCTGGGAAATCTTGTGAAACTCCGTCGTGCTGGGG      | 1500 |
| Sbjct | 1465 | <br>CGAGT-TCTAACCTTGGCCGAGAGGTCTGGGTAATCTTGTGAAACTCCGTCGTGCTGGGG  | 1523 |
| Query | 1501 | ATAGAGCATTGTAATTATTGCTCTTCAACGAGGAATTCCTAGTAAGCGCAAGTCATCAGC      | 1560 |
| Sbjct | 1524 | <br>ATAGAGCATTGTAATTATTGCTCTTCAACGAGGAATTCCTAGTAAGCGCAAGTCATCAGC  | 1583 |
| Query | 1561 | TTGCGTTGATTACGTCCCTGCCCTTTGTACACACCGCCCGTCGCTACTACCGATTGAATG      | 1620 |
| Sbjct | 1584 | <br>TTGCGTTGATTACGTCCCTGCCCTTTGTACACACCGCCCGTCGCTACTACCGATTGAATG  | 1643 |
| Query | 1621 | GCTTAGTGAGGCCTCCGGATTGGTTTAAAGAAGGGGGCAACTCCATCTTGAACCGAAAA       | 1680 |
| Sbjct | 1644 | <br>GCTTAGTGAGGCCTCCGGATTGGTTTAAAGAAGGGGGCAACTCCATCTTGAACCGAAAA   | 1703 |
| Query | 1681 | GCTGGTCAAACCTTGGTCATTTAGAGGAAGTAAAAGTCGTAACAAGGTTTCCGTAGGTGAA     | 1740 |
| Sbjct | 1704 | <br>GCTAGTCAAACCTTGGTCATTTAGAGGAAGTAAAAGTCGTAACAAGGTTTCCGTAGGTGAA | 1763 |
| Query | 1741 | CCTGCGGAAGGATCATT                                                 | 1758 |
| Sbjct | 1764 | <br>CCTGCGGAAGGATCATT                                             | 1781 |

>dbj|AB054270.1| *Debaryomyces hansenii* var. *hansenii* gene for 18S rRNA, partial sequence, strain:JCM 1990  
Length=1752

Score = 3147 bits (1704), Expect = 0.0  
Identities = 1725/1735 (99%), Gaps = 5/1735 (0%)  
Strand=Plus/Plus

|       |     |                                                                   |     |
|-------|-----|-------------------------------------------------------------------|-----|
| Query | 3   | GCCATGCATGTCTAAGTATAAGCAATTTATACAGTGAAACTGCGAATGGCTCATTAAATC      | 62  |
| Sbjct | 21  | <br>GCCATGCATGTCTAAGTATAAGCAATTTATACAGTGAAACTGCGAATGGCTCATTAAATC  | 80  |
| Query | 63  | AGTTATCGTTTATTTGATAGTACCTTTACTACTTGGATAACCGTGGTAATTCTAGAGCTA      | 122 |
| Sbjct | 81  | <br>AGTTATCGTTTATTTGATAGTACCTTTACTACTTGGATAACCGTGGTAATTCTAGAGCTA  | 140 |
| Query | 123 | ATACATGCTAAAAATCCCGACTGTTTGAAGGGATGTATTTATTAGATAAAAAATCAATG       | 182 |
| Sbjct | 141 | <br>ATACATGCTAAAAATCCCGACTGTTTGAAGGGATGTATTTATTAGATAAAAAATCAATG   | 200 |
| Query | 183 | CTTTTCGGAGCTCTTTGATGATTCATAATAACTTTTCGAATCGCATGGCCTTGTGCTGGC      | 242 |
| Sbjct | 201 | <br>CTTTTCGGAGCTCTTTGATGATTCATAATAACTTTTCGAATCGCATGGCCTTGTGCTGGC  | 260 |
| Query | 243 | GATGGTTCATTCAAATTTCTGCCCTATCAACTTTTCGATGGTAGGATAGTGGCCTACCATG     | 302 |
| Sbjct | 261 | <br>GATGGTTCATTCAAATTTCTGCCCTATCAACTTTTCGATGGTAGGATAGTGGCCTACCATG | 320 |
| Query | 303 | GTTTCAACGGGTAACGGGAATAAGGGTTCGATTCGGAGAGGGAGCCTGAGAAACGGCT        | 362 |
| Sbjct | 321 | <br>GTTTCAACGGGTAACGGGAATAAGGGTTCGATTCGGAGAGGGAGCCTGAGAAACGGCT    | 380 |











|       |      |                                                                |      |
|-------|------|----------------------------------------------------------------|------|
| Sbjct | 381  | ACCACATCCAAGGAAGGCAGCAGGCGCAAATTACCCAATCCCGACA-GGGGAGGTAGT     | 439  |
| Query | 423  | GACAATAAATAACGATACAGGGCCCTTTCGGGTCTTGTAATTGGAATGAGTACAATGTAA   | 482  |
| Sbjct | 440  | GACAATAAATAACGATACAGGGCCCTTTCGGGTCTTGTAATTGGAATGAGTACAATGTAA   | 499  |
| Query | 483  | ATACCTTAACGAGGAACAATTGGAGGGCAAGTCTGGTGCCAGCAGCCGCGGTAATTCCAG   | 542  |
| Sbjct | 500  | ATACCTTAACGAGGAACAATTGGAGGGCAAGTCTGGTGCCAGCAGCCGCGGTAATTCCAG   | 559  |
| Query | 543  | CTCCAATAGCGTATATTAAGTTGTTGCAGTTAAAAAGCTCGTAGTTGAACCTTGGGCTT    | 602  |
| Sbjct | 560  | CTCCAATAGCGTATATTAAGTTGTTGCAGTTAAAAAGCTCGTAGTTGAACCTTGGGCTT    | 619  |
| Query | 603  | GGTTGGCCGGTCCGCCTTTTTGGCGAGTACTGGACCCAACCGAGCCTTTCCTTCTGGCTA   | 662  |
| Sbjct | 620  | GGTTGGCCGGTCCGCCTTTTTGGCGAGTACTGGACCCAACCGAGCCTTTCCTTCTGGCTA   | 679  |
| Query | 663  | ACCTTTCGCCCTTGTGGTGTGGCGAACCAGGACTTTTACTTTGAAAAATTAGAGTGT      | 722  |
| Sbjct | 680  | ACCTTTCGCCCTTGTGGTGTGGCGAACCAGGACTTTTACTTTGAAAAATTAGAGTGT      | 739  |
| Query | 723  | TCAAAGCAGGCCTTTCGCTCGAATATATTAGCATGGAATAATAGAATAGGACGTTATGGTT  | 782  |
| Sbjct | 740  | TCAAAGCAGGCC-TTTCGCTCGAATATATTAGCATGGAATAATAGAATAGGACGTTATGGTT | 798  |
| Query | 783  | CTATTTTGTGGTTTCTAGGACCATCGTAATGATTAATAGGGACGGTCGGGGGCATCAGT    | 842  |
| Sbjct | 799  | CTATTTTGTGGTTTCTAGGACCATCGTAATGATTAATAGGGACGGTCGGGGGCATCAGT    | 858  |
| Query | 843  | ATTCAGTTGTCAGAGGTGAAATTCTTGGGA-TTACCTGAAGACTAACTACTGCGAAAGCA-  | 900  |
| Sbjct | 859  | ATTCAGTTGTCAGAGGTGAAATTCTTGGATTTA-CTGAAGACTAACTACTGCGAAAGCAT   | 917  |
| Query | 901  | TTTGCCAAGGACGTTTTTCATTAATCAAGAACGAAAGTTAGGGGATCGAAGATGATCAGAT  | 960  |
| Sbjct | 918  | TTTGCCAAGGACGTTTTTCATTAATCAAGAACGAAAGTTAGGGGATCGAAGATGATCAGAT  | 977  |
| Query | 961  | ACCGTCGTAGTCTTAACCATAAACTATGCCGACTAGGGATCGGGTGTGTTCTtttttttG   | 1020 |
| Sbjct | 978  | ACCGTCGTAGTCTTAACCATAAACTATGCCGACTAGGGATCGGGTGTGTTCTTTTTTTTG   | 1037 |
| Query | 1021 | ACGCACTCGGCACCTTACGAGAAATCAAAGTCTTTGGGTTCTGGGGGAGTATGGTCGCA    | 1080 |
| Sbjct | 1038 | ACGGACTCGGCACCTTACGGGAAATCAAAGTCTTTGGGTTCTGGGGGAGTATGGTCGCA    | 1097 |
| Query | 1081 | AGGCTGAAACTTAAAGGAATTGACGGAAGGGCACCACCAGGAGT-GGAGCCTGCGGCTTA   | 1139 |
| Sbjct | 1098 | AGGCTGAAACTTAAAGGAATTGACGGAAGGGCACCACCAGGAGTGGGA-CCTGCGGCTTA   | 1156 |
| Query | 1140 | ATTTGACTCAACACGGGGAAACTCACCAGGTCCAGACACAATAAGGATTGACAGATTGAG   | 1199 |
| Sbjct | 1157 | ATTTGACTCAACACGGGGAAACTCACCAGGTCCAGACACAATAAGGATTGACAGATTGAG   | 1216 |
| Query | 1200 | AGCTCTTCTTGATTTTGTGGGTGGTGGTGCATGGCCGTTCTTAGTTGGTGGAGTGATTT    | 1259 |
| Sbjct | 1217 | AGCTCTTCTTGATTTTGTGGGTGGTGGTGCATGGCCGTTCTTAGTTGGTGGAGTGATTT    | 1276 |
| Query | 1260 | GTCTGCTTAATTGCGATAACGAACGAGACCTTAACCTACTAAATAGTGCTGCTAGCTTTT   | 1319 |
| Sbjct | 1277 | GTCTGCTTAATTNNGATAACGAACGAGACCTTAACCTACTAAATAGTGCTGCTAGCTTTT   | 1336 |
| Query | 1320 | GCTGGTATAGTCACTTCTTAGAGGGACTATCGATTTCAAGTCGATGGAAGTTTGAGGCAA   | 1379 |

|       |      |                                                              |      |
|-------|------|--------------------------------------------------------------|------|
| Sbjct | 1337 | GCTGGTATAGTCACTTCTTAGAGGGACTATCGATTTCAAGTCGATGGAAGTTTGAGGCAA | 1396 |
| Query | 1380 | TAACAGGTCTGTGATGCCCTTAGACGTTCTGGGCCGCACGCGCGCTACACTGACGGAGCC | 1439 |
|       |      |                                                              |      |
| Sbjct | 1397 | TAACAGGTCTGTGATGCCCTTAGACGTTCTGGGCCGCACGCGCGCTACACTGACGGAGCC | 1456 |
| Query | 1440 | AACGAGTATTAACCTTGGCCGAGAGGTCTGGGAAATCTTGTGAAACTCCGTCGTGCTGGG | 1499 |
|       |      |                                                              |      |
| Sbjct | 1457 | AACGAGTATTAACCTTGGCCGAGAGGTCTGGGAAATCTTGTGAAACTCCGTCGTGCTGGG | 1516 |
| Query | 1500 | GATAGAGCATTGTAATTATTGCTCTTCAACGAGGAATTCCTAGTAAGCGCAAGTCATCAG | 1559 |
|       |      |                                                              |      |
| Sbjct | 1517 | GATAGAGCATTGTAATTATTGCTCTTCAACGAGGAATTCCTAGTAAGCGCAAGTCATCAG | 1576 |
| Query | 1560 | CTTGCGTTGATTACGTCCCTGCCCTTTGTACACACCGCCCGTCGCTACTACCGATTGAAT | 1619 |
|       |      |                                                              |      |
| Sbjct | 1577 | CTTGCGTTGATTACGTCCCTGCCCTTTGTACACACCGCCCGTCGCTACTACCGATTGAAT | 1636 |
| Query | 1620 | GGCTTAGTGAGGCCTCCGGATTGGTTTAAAGAAGGGGGCAACTCCATCTTGAACCGAAA  | 1679 |
|       |      |                                                              |      |
| Sbjct | 1637 | GGCTTAGTGAGGCCTCCGGATTGGTTTAAAGAAGGGGGCAACTCCATCTTGAACCGAAA  | 1696 |
| Query | 1680 | AGCTGGTCAAACCTTGGTCATTTAGAGGAAGTAAAAGTCGTAACAAGGTTTCCGTAG    | 1735 |
|       |      |                                                              |      |
| Sbjct | 1697 | AGCTGGTCAAACCTTGGTCATTTAGAGGAAGTAAAAGTCGTAACAAGGTTTCCGTAG    | 1752 |

>gb|AY553853.1| Candida fermentati strain NRRL Y-17903 18S ribosomal RNA gene, partial sequence  
Length=1740

Score = 3142 bits (1701), Expect = 0.0  
Identities = 1724/1734 (99%), Gaps = 5/1734 (0%)  
Strand=Plus/Plus

|       |     |                                                               |     |
|-------|-----|---------------------------------------------------------------|-----|
| Query | 3   | GCCATGCATGTCTAAGTATAAGCAATTTATACAGTGAAACTGCGAATGGCTCATTAAATC  | 62  |
|       |     |                                                               |     |
| Sbjct | 10  | GCCATGCATGTCTAAGTATAAGCAATTTATACAGTGAAACTGCGAATGGCTCATTAAATC  | 69  |
| Query | 63  | AGTTATCGTTTATTTGATAGTACCTTTACTACTTGGATAACCGTGGTAATTCTAGAGCTA  | 122 |
|       |     |                                                               |     |
| Sbjct | 70  | AGTTATCGTTTATTTGATAGTACCTTTACTACTTGGATAACCGTGGTAATTCTAGAGCTA  | 129 |
| Query | 123 | ATACATGCTAAAAATCCCGACTGTTTGAAGGGATGTATTTATTAGATAAAAAATCAATG   | 182 |
|       |     |                                                               |     |
| Sbjct | 130 | ATACATGCTAAAAATCCCGACTGTTTGAAGGGATGTATTTATTAGATAAAAAATCAATG   | 189 |
| Query | 183 | CT-TTTCGGAGCTCTTTGATGATTCATAATAACTTTTCGAATCGCATGGCCTTGTGCTGG  | 241 |
|       |     |                                                               |     |
| Sbjct | 190 | CTCTTT--GAGCTCTTTGATGATTCATAATAACTTTTCGAATCGCATGGCCTTGTGCTGG  | 247 |
| Query | 242 | CGATGGTTCATTCAAATTTCTGCCCTATCAACTTTCGATGGTAGGATAGTGGCCTACCAT  | 301 |
|       |     |                                                               |     |
| Sbjct | 248 | CGATGGTTCATTCAAATTTCTGCCCTATCAACTTTCGATGGTAGGATAGTGGCCTACCAT  | 307 |
| Query | 302 | GGTTTCAACGGGTAACGGGGAATAAGGGTTCGATTCCGGAGAGGGAGCCTGAGAAACGGC  | 361 |
|       |     |                                                               |     |
| Sbjct | 308 | GGTTTCAACGGGTAACGGGGAATAAGGGTTCGATTCCGGAGAGGGAGCCTGAGAAACGGC  | 367 |
| Query | 362 | TACCACATCCAAGGAAGGCAGCAGGCGCGCAAATTACCCAATCCCGACACGGGGAGGTAG  | 421 |
|       |     |                                                               |     |
| Sbjct | 368 | TACCACATCCAAGGAAGGCAGCAGGCGCGCAAATTACCCAATCCCGACACGGGGAGGTAG  | 427 |
| Query | 422 | TGACAATAAATAACGATACAGGGCCCTTTCGGGTCTTGTAAATTGGAATGAGTACAATGTA | 481 |

|       |      |                                                                   |      |
|-------|------|-------------------------------------------------------------------|------|
| Sbjct | 428  | <br>TGACAATACATAACGATACAGGGCCCTTTCGGGTCTTGTAATTGGAATGAGTACAATGTA  | 487  |
| Query | 482  | AATACCTTAACGAGGAACAATTGGAGGGCAAGTCTGGTGCCAGCAGCCGCGTAATTCCA       | 541  |
| Sbjct | 488  | <br>AATACCTTAACGAGGAACAATTGGAGGGCAAGTCTGGTGCCAGCAGCCGCGTAATTCCA   | 547  |
| Query | 542  | GCTCCAATAGCGTATATTAAGTTGTTGCAGTTAAAAAGCTCGTAGTTGAACCTTGGGCT       | 601  |
| Sbjct | 548  | <br>GCTCCAATAGCGTATATTAAGTTGTTGCAGTTAAAAAGCTCGTAGTTGAACCTTGGGCT   | 607  |
| Query | 602  | TGGTTGGCCGGTCCGCCTTTTTGGCGAGTACTGGACCCAACCGAGCCTTTCCTTCTGGCT      | 661  |
| Sbjct | 608  | <br>TGGTTGGCCGGTCCGCCTTTTTGGCGAGTACTGGACCCAACCGAGCCTTTCCTTCTGGCT  | 667  |
| Query | 662  | AACCTTTCGCCCTTGTGGTGTGGCGAACCAGGACTTTTACTTTGAAAAATTAGAGTG         | 721  |
| Sbjct | 668  | <br>AACCATTCGCCCTTGTGGTGTGGCGAACCAGGACTTTTACTTTGAAAAATTAGAGTG     | 727  |
| Query | 722  | TTCAAAGCAGGCCTTTGCTCGAATATATTAGCATGGAATAATAGAATAGGACGTTATGGT      | 781  |
| Sbjct | 728  | <br>TTCAAAGCAGGCCTTTGCTCGAATATATTAGCATGGAATAATAGAATAGGACGTTATGGT  | 787  |
| Query | 782  | TCTATTTTGTGGTTTCTAGGACCATCGTAATGATTAATAGGGACGGTCGGGGGCATCAG       | 841  |
| Sbjct | 788  | <br>TCTATTTTGTGGTTTCTAGGACCATCGTAATGATTAATAGGGACGGTCGGGGGCATCAG   | 847  |
| Query | 842  | TATTCAGTTGTCAGAGGTGAAATTCTTGGA-TTACCTGAAGACTAACTACTGCGAAAGCA      | 900  |
| Sbjct | 848  | <br>TATTCAGTTGTCAGAGGTGAAATTCTTAGATTTA-CTGAAGACTAACTACTGCGAAAGCA  | 906  |
| Query | 901  | TTTGCCAAGGACGTTTTTCATTAATCAAGAACGAAAGTTAGGGGATCGAAGATGATCAGAT     | 960  |
| Sbjct | 907  | <br>TTTGCCAAGGACGTTTTTCATTAATCAAGAACGAAAGTTAGGGGATCGAAGATGATCAGAT | 966  |
| Query | 961  | ACCGTCGTAGTCTTAACCATAAACTATGCCGACTAGGGATCGGGTGTGTTCTtttttttG      | 1020 |
| Sbjct | 967  | <br>ACCGTCGTAGTCTTAACCATAAACTATGCCGACTAGGGATCGGGTGTGTTCTTTTTTTG   | 1026 |
| Query | 1021 | ACGCACTCGGCACCTTACGAGAAATCAAAGTCTTTGGGTTCTGGGGGAGTATGGTCGCA       | 1080 |
| Sbjct | 1027 | <br>ACGCACTCGGCACCTTACGAGAAATCAAAGTCTTTGGGTTCTGGGGGAGTATGGTCGCA   | 1086 |
| Query | 1081 | AGGCTGAAACTTAAAGGAATTGACGGAAGGGCACCACCAGGAGTGGAGCCTGCGGCTTAA      | 1140 |
| Sbjct | 1087 | <br>AGGCTGAAACTTAAAGGAATTGACGGAAGGGCACCACCAGGAGTGGAGCCTGCGGCTTAA  | 1146 |
| Query | 1141 | TTTGACTCAACACGGGGAAACTCACCAGGTCCAGACACAATAAGGATTGACAGATTGAGA      | 1200 |
| Sbjct | 1147 | <br>TTTGACTCAACACGGGGAAACTCACCAGGTCCAGACACAATAAGGATTGACAGATTGAGA  | 1206 |
| Query | 1201 | GCTCTTTCTTGATTTTGTGGGTGGTGGTGCATGGCCGTTCTTAGTTGGTGGAGTGATTTG      | 1260 |
| Sbjct | 1207 | <br>GCTCTTTCTTGATTTTGTGGGTGGTGGTGCATGGCCGTTCTTAGTTGGTGGAGTGATTTG  | 1266 |
| Query | 1261 | TCTGCTTAATTGCGATAACGAACGAGACCTTAACCTACTAAATAGTGCTGCTAGCTTTTG      | 1320 |
| Sbjct | 1267 | <br>TCTGCTTAATTGCGATAACGAACGAGACCTTAACCTACTAAATAGTGCTGCTAGCTTTTG  | 1326 |
| Query | 1321 | CTGGTATAGTCACTTCTTAGAGGGACTATCGATTTCAAGTCGATGGAAGTTTGAGGCAAT      | 1380 |
| Sbjct | 1327 | <br>CTGGTATAGTCACTTCTTAGAGGGACTATCGATTTCAAGTCGATGGAAGTTTGAGGCAAT  | 1386 |
| Query | 1381 | AACAGGTCTGTGATGCCCTTAGACGTTCTGGGCCGCACGCGCTACACTGACGGAGCCA        | 1440 |

|       |      |                                                                  |      |
|-------|------|------------------------------------------------------------------|------|
| Sbjct | 1387 | <br>AACAGGTCTGTGATGCCCTTAGACGTTCTGGGCCGCACGCGCTACACTGACGGAGCCA   | 1446 |
| Query | 1441 | ACGAGTATTAACCTTGGCCGAGAGGTCTGGGAAATCTTGTGAAACTCCGTCGTGCTGGGG     | 1500 |
| Sbjct | 1447 | <br>GCGAGTATTAACCTTGGCCGAGAGGTCTGGGAAATCTTGTGAAACTCCGTCGTGCTGGGG | 1506 |
| Query | 1501 | ATAGAGCATTGTAATTATTGCTCTTCAACGAGGAATTCCTAGTAAGCGCAAGTCATCAGC     | 1560 |
| Sbjct | 1507 | <br>ATAGAGCATTGTAATTATTGCTCTTCAACGAGGAATTCCTAGTAAGCGCAAGTCATCAGC | 1566 |
| Query | 1561 | TTGCGTTGATTACGTCCCTGCCCTTTGTACACACCGCCCGTCGCTACTACCGATTGAATG     | 1620 |
| Sbjct | 1567 | <br>TTGCGTTGATTACGTCCCTGCCCTTTGTACACACCGCCCGTCGCTACTACCGATTGAATG | 1626 |
| Query | 1621 | GCTTAGTGAGGCCTCCGGATTGGTTTAAAGAAGGGGGCAACTCCATCTTGAACCGAAAA      | 1680 |
| Sbjct | 1627 | <br>GCTTAGTGAGGCCTCCGGATTGGTTTAAAGAAGGGGGCAACTCCATCTTGAACCGAAAA  | 1686 |
| Query | 1681 | GCTGGTCAAACCTTGGTCATTTAGAGGAAGTAAAAGTCGTAACAAGGTTTCCGTA          | 1734 |
| Sbjct | 1687 | <br>GCTGGTCAAACCTTGGTCATTTAGAGGAAGTAAAAGTCGTAACAAGGTTTCCGTA      | 1740 |

>gb|EF428134.1| *Debaryomyces hansenii* strain shiziwei2 18S ribosomal RNA gene, partial sequence  
Length=1708

Score = 3140 bits (1700), Expect = 0.0  
Identities = 1706/1709 (99%), Gaps = 2/1709 (0%)  
Strand=Plus/Plus

|       |     |                                                                   |     |
|-------|-----|-------------------------------------------------------------------|-----|
| Query | 3   | GCCATGCATGTCTAAGTATAAGCAATTTATACAGTGAAACTGCGAATGGCTCATTAAATC      | 62  |
| Sbjct | 1   | <br>GCCATGCATGTCTAAGTATAAGCAATTTATACAGTGAAACTGCGAATGGCTCATTAAATC  | 60  |
| Query | 63  | AGTTATCGTTTATTTGATAGTACCTTTACTACTTGGATAACCGTGGTAATTCTAGAGCTA      | 122 |
| Sbjct | 61  | <br>AGTTATCGTTTATTTGATAGTACCTTTACTACTTGGATAACCGTGGTAATTCTAGAGCTA  | 120 |
| Query | 123 | ATACATGCTAAAAATCCCGACTGTTTGAAGGGATGTATTTATTAGATAAAAAATCAATG       | 182 |
| Sbjct | 121 | <br>ATACATGCTAAAAATCCCGACTGTTTGAAGGGATGTATTTATTAGATAAAAAATCAATG   | 180 |
| Query | 183 | CTTTTCGGAGCTCTTTGATGATTCATAATAACTTTTCGAATCGCATGGCCTTGTGCTGGC      | 242 |
| Sbjct | 181 | <br>CTTTTCGGAGCTCTTTGATGATTCATAATAACTTTTCGAATCGCATGGCCTTGTGCTGGC  | 240 |
| Query | 243 | GATGGTTCATTCAAATTTCTGCCCTATCAACTTTTCGATGGTAGGATAGTGGCCTACCATG     | 302 |
| Sbjct | 241 | <br>GATGGTTCATTCAAATTTCTGCCCTATCAACTTTTCGATGGTAGGATAGTGGCCTACCATG | 300 |
| Query | 303 | GTTTCAACGGGTAACGGGGAATAAGGGTTCGATTCCGGAGAGGGAGCCTGAGAAACGGCT      | 362 |
| Sbjct | 301 | <br>GTTTCAACGGGTAACGGGGAATAAGGGTTCGATTCCGGAGAGGGAGCCTGAGAAACGGCT  | 360 |
| Query | 363 | ACCACATCCAAGGAAGGCAGCAGGCGCGCAAATTACCCAATCCCGACACGGGGAGGTAGT      | 422 |
| Sbjct | 361 | <br>ACCACATCCAAGGAAGGCAGCAGGCGCGCAAATTACCCAATCCCGACACGGGGAGGTAGT  | 420 |
| Query | 423 | GACAATAAATAACGATACAGGGCCCTTTCGGGTCTTGTAAATTGGAATGAGTACAATGTAA     | 482 |
| Sbjct | 421 | <br>GACAATAAATAACGATACAGGGCCCTTTCGGGTCTTGTAAATTGGAATGAGTACAATGTAA | 480 |



```

Query 1442 CGAGTATTAACCTTGGCCGAGAGGTCTGGGAAATCTTGTGAAACTCCGTCGTGCTGGGGA 1501
          |||
Sbjct 1440 CGAGTATTAACCTTGGCCGAGAGGTCTGGGAAATCTTGTGAAACTCCGTCGTGCTGGGGA 1499

Query 1502 TAGAGCATTGTAATTATTGCTCTTCAACGAGGAATTCCTAGTAAGCGCAAGTCATCAGCT 1561
          |||
Sbjct 1500 TAGAGCATTGTAATTATTGCTCTTCAACGAGGAATTCCTAGTAAGCGCAAGTCATCAGCT 1559

Query 1562 TCGGTTGATTACGTCCCTGCCCTTTGTACACACCGCCCGTCGCTACTACCGATTGAATGG 1621
          |||
Sbjct 1560 TCGGTTGATTACGTCCCTGCCCTTTGTACACACCGCCCGTCGCTACTACCGATTGAATGG 1619

Query 1622 CTTAGTGAGGCCCTCCGGATTGGTTTAAAGAAGGGGGCAACTCCATCTTGGAACCGAAAAG 1681
          |||
Sbjct 1620 CTTAGTGAGGCCCTCCGGATTGGTTTAAAGAAGGGGGCAACTCCATCTTGGAACCGAAAAG 1679

Query 1682 CTGGTCAAACCTTGGTCATTTAGAGGAAGT 1710
          |||
Sbjct 1680 CTGGTCAAACCTTGGTCATTTAGAGGAAGT 1708

```

>dbj|AB013581.1| *Candida santamariae* var. *membranifaciens* 18S rRNA gene, strain JCM 9844, partial sequence  
Length=1781

Score = 3140 bits (1700), Expect = 0.0  
Identities = 1740/1758 (98%), Gaps = 8/1758 (0%)  
Strand=Plus/Plus

```

Query 3 GCCATGCATGTCTAAGTATAAGCAATTTATACAGTGAAACTGCGAATGGCTCATTAAATC 62
          |||
Sbjct 30 GCCATGCATGTCTAAGTATAAGCAATTTATACAGTGAAACTGCGAATGGCTCATTAAATC 89

Query 63 AGTTATCGTTTATTTGATAGTACCTTTACTACTTGGATAACCGTGGTAATTCTAGAGCTA 122
          |||
Sbjct 90 AGTTATCGTTTATTTGATAGTACCTTTACTACTTGGATAACCGTGGTAATTCTAGAGCTA 149

Query 123 ATACATGCTAAAAATCCCGACTGTTTGAAGGGATGTATTTATTAGATAAAAAATCAATG 182
          |||
Sbjct 150 ATACATGCTAAAAATCCCGACT-TCTGGAAGGGATGTATTTATTAGATAAAAAATCAATG 208

Query 183 CTTTTCGGAGCTCTTTGATGATTCATAATAACTTTTCGAATCGCATGGCCTTGTGCTGGC 242
          |||
Sbjct 209 C-TTTC-GAGCTCTTTGATGATTCATAATAACTTTTCGAATCGCATGGCCTTGTGCTGGC 266

Query 243 GATGGTTCATTCAAATTTCTGCCCTATCAACTTTTCGATGGTAGGATAGTGGCCTACCATG 302
          |||
Sbjct 267 GATGGTTCATTCAAATTTCTGCCCTATCAACTTTTCGATGGTAGGATAGTGGCCTACCATG 326

Query 303 GTTTCAACGGGTAACGGGGAATAAGGGTTCGATTCCGGAGAGGGAGCCTGAGAAACGGCT 362
          |||
Sbjct 327 GTTTCAACGGGTAACGGGGAATAAGGGTTCGATTCCGGAGAGGGAGCCTGAGAAACGGCT 386

Query 363 ACCACATCCAAGGAAGGCAGCAGGCGCGCAAATTACCCAATCCCGACACGGGGAGGTAGT 422
          |||
Sbjct 387 ACCACATCCAAGGAAGGCAGCAGGCGCGCAAATTACCCAATCCCGACACGGGGAGGTAGT 446

Query 423 GACAATAAATAACGATACAGGGCCCTTTTCGGGTCTTGTAAATTGGAATGAGTACAATGTAA 482
          |||
Sbjct 447 GACAATAAATAACGATACAGGGCCCTTTTCGGGTCTTGTAAATTGGAATGAGTACAATGTAA 506

Query 483 ATACCTTAACGAGGAACAATTGGAGGGCAAGTCTGGTGCCAGCAGCCGCGGTAATTCCAG 542
          |||
Sbjct 507 ATACCTTAACGAGGAACAATTGGAGGGCAAGTCTGGTGCCAGCAGCCGCGGTAATTCCAG 566

```



```

Query 1501 ATAGAGCATTGTAATTATTGCTCTTCAACGAGGAATTCCTAGTAAGCGCAAGTCATCAGC 1560
          |||
Sbjct 1524 ATAGAGCATTGTAATTATTGCTCTTCAACGAGGAATTCCTAGTAAGCGCAAGTCATCAGC 1583

Query 1561 TTGCGTTGATTACGTCCCTGCCCTTTGTACACACCGCCCGTCGCTACTACCGATTGAATG 1620
          |||
Sbjct 1584 TTGCGTTGATTACGTCCCTGCCCTTTGTACACACCGCCCGTCGCTACTACCGATTGAATG 1643

Query 1621 GCTTAGTGAGGCCTCCGGATTGGTTTAAAGAAGGGGGCAACTCCATCTTGAACCGAAAA 1680
          |||
Sbjct 1644 GCTTAGTGAGGCCTCCGGATTGGTTTAAAGAAGGGGGCAACTCCATCTTGAACCGAAAA 1703

Query 1681 GCTGGTCAAACCTTGGTCATTTAGAGGAAGTAAAAGTCGTAACAAGGTTTCCGTAGGTGAA 1740
          |||
Sbjct 1704 GCTAGTCAAACCTTGGTCATTTAGAGGAAGTAAAAGTCGTAACAAGGTTTCCGTAGGTGAA 1763

Query 1741 CCTGCGGAAGGATCATT 1758
          |||
Sbjct 1764 CCTGCGGAAGGATCATT 1781

```

>dbj|AB013536.1| *Candida santamariae* var. *santamariae* 18S rRNA gene, strain JCM 1816, partial sequence  
Length=1780

Score = 3138 bits (1699), Expect = 0.0  
Identities = 1740/1758 (98%), Gaps = 9/1758 (0%)  
Strand=Plus/Plus

```

Query 3 GCCATGCATGTCTAAGTATAAGCAATTTATACAGTGAAACTGCGAATGGCTCATTAAATC 62
        |||
Sbjct 30 GCCATGCATGTCTAAGTATAAGCAATTTATACAGTGAAACTGCGAATGGCTCATTAAATC 89

Query 63 AGTTATCGTTTATTTGATAGTACCTTTACTACTTGGATAACCGTGGTAATTCTAGAGCTA 122
        |||
Sbjct 90 AGTTATCGTTTATTTGATAGTACCTTTACTACTTGGATAACCGTGGTAATTCTAGAGCTA 149

Query 123 ATACATGCTAAAAATCCCGACTGTTTGAAGGGATGTATTTATTAGATAAAAAATCAATG 182
        |||
Sbjct 150 ATACATGCTAAAAATCCCGACT-TCTGGAAGGGATGTATTTATTAGATAAAAAATCAATG 208

Query 183 CTTTTCGGAGCTCTTTGATGATTCAATAAATTTTCGAATCGCATGGCCTTGTGCTGGC 242
        |||
Sbjct 209 C-TTTC-GAGCTCTTTGATGATTCAATAAATTTTCGAATCGCATGGCCTTGTGCTGGC 266

Query 243 GATGGTTCATTCAAATTTCTGCCCTATCAACTTTTCGATGGTAGGATAGTGGCCTACCATG 302
        |||
Sbjct 267 GATGGTTCATTCAAATTTCTGCCCTATCAACTTTTCGATGGTAGGATAGTGGCCTACCATG 326

Query 303 GTTTCAACGGGTAACGGGGAATAAGGGTTCGATTCCGGAGAGGGAGCCTGAGAAACGGCT 362
        |||
Sbjct 327 GTTTCAACGGGTAACGGGGAATAAGGGTTCGATTCCGGAGAGGGAGCCTGAGAAACGGCT 386

Query 363 ACCACATCCAAGGAAGGCAGCAGGCGCGCAAATTACCCAATCCCGACACGGGGAGGTAGT 422
        |||
Sbjct 387 ACCACATCCAAGGAAGGCAGCAGGCGCGCAAATTACCCAATCCCGACACGGGGAGGTAGT 446

Query 423 GACAATAAATAACGATACAGGGCCCTTTTCGGGTCTTGTAAATTGGAATGAGTACAATGTAA 482
        |||
Sbjct 447 GACAATAAATAACGATACAGGG-CCTTTTCGGGTCTTGTAAATTGGAATGAGTACAATGTAA 505

Query 483 ATACCTTAACGAGGAACAATTGGAGGGCAAGTCTGGTGCCAGCAGCCGCGTAATTCCAG 542
        |||

```



|       |      |                                                              |      |
|-------|------|--------------------------------------------------------------|------|
| Sbjct | 506  | ATACCTTAACGAGGAACAATTGGAGGGCAAGTCTGGTGCCAGCAGCCGCGGTAATTCCAG | 565  |
| Query | 543  | CTCCAATAGCGTATATTAAGTTGTTGCAGTTAAAAAGCTCGTAGTTGAACCTTGGGCTT  | 602  |
| Sbjct | 566  | CTCCAATAGCGTATATTAAGTTGTTGCAGTTAAAAAGCTCGTAGTTGAACCTTGGGTTT  | 625  |
| Query | 603  | GGTTGGCCGGTCCGCCTTTTTGGCGAGTACTGGACCCAACCGAGCCTTTCCTTCTGGCTA | 662  |
| Sbjct | 626  | GGTTGGCCGGTCCG-CTTTATGGCGAGTACTGGACCCAACCGAACCTTTCCTTCTGGCTA | 684  |
| Query | 663  | ACCTTTCGCCCTTGTGGTGTGGCGAACCAGGACTTTTACTTTGAAAAAATTAGAGTGT   | 722  |
| Sbjct | 685  | ACCATTTCGCCCTTGTGGTGTGGCGAACCAGGACTTTTACTTTGAAAAAATTAGAGTGT  | 744  |
| Query | 723  | TCAAAGCAGGCCTTGTCTCGAATATATTAGCATGGAATAATAGAATAGGACGTTATGGTT | 782  |
| Sbjct | 745  | TCAAAGCAGGCCTTGTCTCGAATATATTAGCATGGAATAATAGAATAGGACGTTATGGTT | 804  |
| Query | 783  | CTATTTTGTGGTTTCTAGGACCATCGTAATGATTAATAGGGACGGTCGGGGGCATCAGT  | 842  |
| Sbjct | 805  | CTATTTTGTGGTTTCTAGGACCATCGTAATGATTAATAGGGACGGTCGGGGGCATCAGT  | 864  |
| Query | 843  | ATTCAGTTGTCAGAGGTGAAATTCTTGGG-TTACCTGAAGACTAACTACTGCGAAAGCAT | 901  |
| Sbjct | 865  | ATTCAGTTGTCAGAGGTGAAATTCTTGGATTTA-CTGAAGACTAACTACTGCGAAAGCAT | 923  |
| Query | 902  | TTGCCAAGGACGTTTTCATTAATCAAGAACGAAAGTTAGGGGATCGAAGATGATCAGATA | 961  |
| Sbjct | 924  | TTGCCAAGGACGTTTTCATTAATCAAGAACGAAAGTTAGGGGATCGAAGATGATCAGATA | 983  |
| Query | 962  | CCGTCGTAGTCTTAACCATAAACTATGCCGACTAGGGATCGGGTGTGTTCTtttttttGA | 1021 |
| Sbjct | 984  | CCGTCGTAGTCTTAACCATAAACTATGCCGACTAGGGATCGGGTGTGTTCTTTTTTTGA  | 1043 |
| Query | 1022 | CGCACTCGGCACCTTACGAGAAATCAAAGTCTTTGGGTTCTGGGGGGAGTATGGTCGCAA | 1081 |
| Sbjct | 1044 | CGCACTCGGCACCTTACGAGAAATCAAAGTCTTTGGGTTCTGGGGGGAGTATGGTCGCAA | 1103 |
| Query | 1082 | GGCTGAAACTTAAAGGAATTGACGGAAGGGCACCACCAGGAGTGGAGCCTGCGGCTTAAT | 1141 |
| Sbjct | 1104 | GGCTGAAACTTAAAGGAATTGACGGAAGGGCACCACCAGGAGTGGAGCCTGCGGCTTAAT | 1163 |
| Query | 1142 | TTGACTCAACACGGGGAAACTCACCAGGTCCAGACACAATAAGGATTGACAGATTGAGAG | 1201 |
| Sbjct | 1164 | TTGACTCAACACGGGGAAACTCACCAGGTCCAGACACAATAAGGATTGACAGATTGAGAG | 1223 |
| Query | 1202 | CTCTTTCTTGATTTTGTGGGTGGTGGTGCATGGCCGTTCTTAGTTGGTGGAGTGATTTGT | 1261 |
| Sbjct | 1224 | CTCTTTCTTGATTTTGTGGGTGGTGGTGCATGGCCGTTCTTAGTTGGTGGAGTGATTTGT | 1283 |
| Query | 1262 | CTGCTTAATTGCGATAACGAACGAGACCTTAACCTACTAAATAGTGCTGCTAGCTTTTGC | 1321 |
| Sbjct | 1284 | CTGCTTAATTGCGATAACGAACGAGACCTTAACCTACTAAATAGTGCTGCTAGCTTTTGC | 1343 |
| Query | 1322 | TGGTATAGTCACTTCTTAGAGGGACTATCGATTTCAAGTCGATGGAAGTTTGGAGCAATA | 1381 |
| Sbjct | 1344 | TGGTATAGTCACTTCTTAGAGGGACTATCGATTTCAAGTCGATGGAAGTTTGGAGCAATA | 1403 |
| Query | 1382 | ACAGGTCTGTGATGCCCTTAGACGTTCTGGGCCGCACGCGCGCTACACTGACGGAGCCAA | 1441 |
| Sbjct | 1404 | ACAGGTCTGTGATGCCCTTAGACGTTCTGGGCCGCACGCGCGCTACACTGACGGAGCCAG | 1463 |
| Query | 1442 | CGAGTAT-TAACCTTGGCCGAGAGGTCTGGGAAATCTTGTGAAACTCCGTCGTGCTGGGG | 1500 |

```

Sbjct 1464 CGAGT-TCTAACCTTGGCCGAGAGGTCTGGGTAATCTTGTGAAACTCCGTCGTGCTGGGG 1522
Query 1501 ATAGAGCATTGTAATTATTGCTCTTCAACGAGGAATTCCTAGTAAGCGCAAGTCATCAGC 1560
      |||
Sbjct 1523 ATAGAGCATTGTAATTATTGCTCTTCAACGAGGAATTCCTAGTAAGCGCAAGTCATCAGC 1582
Query 1561 TTGCGTTGATTACGTCCCTGCCCTTTGTACACACCGCCCGTCGCTACTACCGATTGAATG 1620
      |||
Sbjct 1583 TTGCGTTGATTACGTCCCTGCCCTTTGTACACACCGCCCGTCGCTACTACCGATTGAATG 1642
Query 1621 GCTTAGTGAGGCCTCCGGATTGGTTTAAAGAAGGGGGCAACTCCATCTTGGAACCGAAAA 1680
      |||
Sbjct 1643 GCTTAGTGAGGCCTCCGGATTGGTTTAAAGAAGGGGGCAACTCCATCTTGGAACCGAAAA 1702
Query 1681 GCTGGTCAAACCTTGGTCATTTAGAGGAAGTAAAAGTCGTAACAAGGTTTCCGTAGGTGAA 1740
      |||
Sbjct 1703 GCTAGTCAAACCTTGGTCATTTAGAGGAAGTAAAAGTCGTAACAAGGTTTCCGTAGGTGAA 1762
Query 1741 CCTGCGGAAGGATCATT 1758
      |||
Sbjct 1763 CCTGCGGAAGGATCATT 1780

```

>dbj|AB013534.1| Candida oleophila 18S rRNA gene, strain JCM 1620, partial sequence  
Length=1780

Score = 3138 bits (1699), Expect = 0.0  
Identities = 1741/1759 (98%), Gaps = 11/1759 (0%)  
Strand=Plus/Plus

```

Query 3 GCCATGCATGTCTAAGTATAAGCAATTTATACAGTGAAACTGCGAATGGCTCATTAAATC 62
      |||
Sbjct 30 GCCATGCATGTCTAAGTATAAGCAATTTATACAGTGAAACTGCGAATGGCTCATTAAATC 89
Query 63 AGTTATCGTTTATTTGATAGTACCTTTACTACTTGGATAACCGTGGTAATTCTAGAGCTA 122
      |||
Sbjct 90 AGTTATCGTTTATTTGATAGTACCTTTACTACTTGGATAACCGTGGTAATTCTAGAGCTA 149
Query 123 ATACATGCTAAAAATCCCGACTGTTTGAAGGGATGTATTTATTAGATAAAAAATCAATG 182
      |||
Sbjct 150 ATACATGCTAAAAATCCCGACT-TCTGGAAGGGATGTATTTATTAGATAAAAAATCAATG 208
Query 183 CT-TTTCGGAGCTCTTTGATGATTCAATAAATTTTCGAATCGCATGGCCTTGTGCTGG 241
      |||
Sbjct 209 CTCTTT--GAGCTCTTTGATGATTCAATAAATTTTCGAATCGCATGGCCTTGTGCTGG 266
Query 242 CGATGGTTCATTCAAATTTCTGCCCTATCAACTTTCGATGGTAGGATAGTGGCCTACCAT 301
      |||
Sbjct 267 CGATGGTTCATTCAAATTTCTGCCCTATCAACTTTCGATGGTAGGATAGTGGCCTACCAT 326
Query 302 GGTTTCAACGGGTAACGGGGAATAAGGGTTCGATTCCGGAGAGGGAGCCTGAGAAACGGC 361
      |||
Sbjct 327 GGTTTCAACGGGTAACGGGGAATAAGGGTTCGATTCCGGAGAGGGAGCCTGAGAAACGGC 386
Query 362 TACCACATCCAAGGAAGGCAGCAGGCGCGCAAATTACCCAATCCCGACACGGGGAGGTAG 421
      |||
Sbjct 387 TACCACATCCAAGGAAGGCAGCAGGCGCGCAAATTACCCAATCCCGACACGGGGAGGTAG 446
Query 422 TGACAATAAATAACGATACAGGGCCCTTTCGGGTCTTGTAAATTGGAATGAGTACAATGTA 481
      |||
Sbjct 447 TGACAATAAATAACGATACAGGG-CCTTTCGGGTCTTGTAAATTGGAATGAGTACAATGTA 505
Query 482 AATACCTTAACGAGGAACAATTGGAGGGCAAGTCTGGTGCCAGCAGCCGCGGTAATTCCA 541
      |||

```

|       |      |                                                               |      |
|-------|------|---------------------------------------------------------------|------|
| Sbjct | 506  | AATACCTTAACGAGGAACAATTGGAGGGCAAGTCTGGTGCCAGCAGCCGCGGTAATTCCA  | 565  |
| Query | 542  | GCTCCAATAGCGTATATTTAAAGTTGTTGCAGTTAAAAAGCTCGTAGTTGAACCTTGGGCT | 601  |
| Sbjct | 566  | GCTCCAATAGCGTATATTTAAAGTTGTTGCAGTTAAAAAGCTCGTAGTTGAACCTTGGGCT | 625  |
| Query | 602  | TGGTTGGCCGGTCCGCCTTTTTGGCGAGTACTGGACCCAACCGAGCCTTTCCTTCTGGCT  | 661  |
| Sbjct | 626  | TGGTTGGCCGGTCCG-CTTTATGGCGAGTACTGGACCCAACCGAGCCTTTCCTTCTGGCT  | 684  |
| Query | 662  | AACCTTTCGCCCTTGTGGTGTGGCGAACCAGGACTTTTACTTTGAAAAAATTAGAGTG    | 721  |
| Sbjct | 685  | AACCTTTCGCCCTTGTGGTGTGGGAGAACCAGGACTTTTACTTTGAAAAAATTAGAGTG   | 744  |
| Query | 722  | TTCAAAGCAGGCCTTTGCTCGAATATATTAGCATGGAATAATAGAATAGGACGTTATGGT  | 781  |
| Sbjct | 745  | TTCAAAGCAGGCCTTTGCTCGAATATATTAGCATGGAATAATAGAATAGGACGTTATGGT  | 804  |
| Query | 782  | TCTATTTTGTGGTTTCTAGGACCATCGTAATGATTAATAGGGACGGTCGGGGGCATCAG   | 841  |
| Sbjct | 805  | TCTATTTTGTGGTTTCTAGGACCATCGTAATGATTAATAGGGACGGTCGGGGGCATCAG   | 864  |
| Query | 842  | TATTCAGTTGTCAGAGGTGAAATTCTTGGA-TTACCTGAAGACTAACTACTGCGAAAGCA  | 900  |
| Sbjct | 865  | TATTCAGTTGTCAGAGGTGAAATTCTTGATTTA-CTGAAGACTAACTACTGCGAAAGCA   | 923  |
| Query | 901  | TTTGCCAAGGACGTTTTTCATTAATCAAGAACGAAAGTTAGGGGATCGAAGATGATCAGAT | 960  |
| Sbjct | 924  | TTTGCCAAGGACGTTTTTCATTAATCAAGAACGAAAGTTAGGGGATCGAAGATGATCAGAT | 983  |
| Query | 961  | ACCGTCGTAGTCTTAACCATAAACTATGCCGACTAGGGATCGGGTGTGTTCTtttttttG  | 1020 |
| Sbjct | 984  | ACCGTCGTAGTCTTAACCATAAACTATGCCGACTAGGGATCGGGTGTGTTCTTTTTTTG   | 1043 |
| Query | 1021 | ACGCACTCGGCACCTTACGAGAAATCAAAGTCTTTGGGTTCTGGGGGAGTATGGTCGCA   | 1080 |
| Sbjct | 1044 | ACGCACTCGGCACCTTACGAGAAATCAAAGTCTTTGGGTTCTGGGGGAGTATGGTCGCA   | 1103 |
| Query | 1081 | AGGCTGAAACTTAAAGGAATTGACGGAAGGGCACCACCAGGAGTGGAGCCTGCGGCTTAA  | 1140 |
| Sbjct | 1104 | AGGCTGAAACTTAAAGGAATTGACGGAAGGGCACCACCAGGAGTGGAGCCTGCGGCTTAA  | 1163 |
| Query | 1141 | TTTGACTCAACACGGGGAAACTCACCAGGTCCAGACACAATAAGGATTGACAGATTGAGA  | 1200 |
| Sbjct | 1164 | TTTGACTCAACACGGGGAAACTCACCAGGTCCAGACACAATAAGGATTGACAGATTGAGA  | 1223 |
| Query | 1201 | GCTCTTTCTTGATTTTGTGGGTGGTGGTGCATGGCCGTTCTTAGTTGGTGGAGTGATTTG  | 1260 |
| Sbjct | 1224 | GCTCTTTCTTGATTTTGTGGGTGGTGGTGCATGGCCGTTCTTAGTTGGTGGAGTGATTTG  | 1283 |
| Query | 1261 | TCTGCTTAATTGCGATAACGAACGAGACCTTAACCTACTAAATAGTGCTGCTAGCTTTTG  | 1320 |
| Sbjct | 1284 | TCTGCTTAATTGCGATAACGAACGAGACCTTAACCTACTAAATAGTGCTGCTAGCTTTTG  | 1343 |
| Query | 1321 | CTGGTATAGTCACTTCTTAGAGGGACTATCGATTTCAAGTCGATGGAAGTTTGAGGCAAT  | 1380 |
| Sbjct | 1344 | CTGGTATAGTCACTTCTTAGAGGGACTATCGATTTCAAGTCGATGGAAGTTTGAGGCAAT  | 1403 |
| Query | 1381 | AACAGGTCTGTGATGCCCTTAGACGTTCTGGGCCGCACGCGCTACACTGACGGAGCCA    | 1440 |
| Sbjct | 1404 | AACAGGTCTGTGATGCCCTTAGACGTTCTGGGCCGCACGCGCTACACTGACGGAGCCA    | 1463 |
| Query | 1441 | ACGAGTAT-TAACCTTGCCGAGAGGTCTGGGAAATCTTGTGAAACTCCGTCGTGCTGGG   | 1499 |



|       |      |                                                               |      |
|-------|------|---------------------------------------------------------------|------|
| Sbjct | 482  | ATACCTTAACGAGGAACAATTGGAGGGCAAGTCTGGTGCCAGCAGCCGCGGTAATTCCAG  | 541  |
| Query | 543  | CTCCAATAGCGTATATTAAGTTGTTGCAGTTAAAAAGCTCGTAGTTGAACCTTGGGCTT   | 602  |
| Sbjct | 542  | CTCCAATAGCGTATATTAAGTTGTTGCAGTTAAAAAGCTCGTAGTTGAACCTTGGGCTT   | 601  |
| Query | 603  | GGTTGGCCGGTCCGCCTTTTTGGCGAGTACTGGACCCAACCGAGCCTTTCCTTCTGGCTA  | 662  |
| Sbjct | 602  | GGTTGGCCGGTCCGCCTTTTTGGCGAGTACTGGACCCAACCGAGCCTTTCCTTCTGGCTA  | 661  |
| Query | 663  | ACCTTTCGCCCTTGTGGTGTGGCGAACCAGGACTTTTACTTTGAAAAAATTAGAGTGT    | 722  |
| Sbjct | 662  | ACCTTTCGCCCTTGTGGTGTGGCGAACCAGGACTTTTACTTTGAAAAAATTAGAGTGT    | 721  |
| Query | 723  | TCAAAGCAGGCCTTGTCTCGAATATATTAGCATGGAATAATAGAATAGGACGTTATGGTT  | 782  |
| Sbjct | 722  | TCAAAGCAGGCCTTGTCTCGAATATATTAGCATGGAATAATAGAATAGGACGTTATGGTT  | 781  |
| Query | 783  | CTATTTTGTGGTTTCTAGGACCATCGTAATGATTAATAGGGACGGTCGGGGGCATCAGT   | 842  |
| Sbjct | 782  | CTATTTTGTGGTTTCTAGGACCATCGTAATGATTAATAGGGACGGTCGGGGGCATCAGT   | 841  |
| Query | 843  | ATTCAGTTGTCAGAGGTGAAATTCTTGGATTACCTGAAGACTAACTACTGCGAAAGCATT  | 902  |
| Sbjct | 842  | ATTCAGTTGTCAGAGGTGAAATTCTTGGATTACCTGAAGACTAACTACTGCGAAAGCATT  | 901  |
| Query | 903  | TGCCAAGGACGTTTTTCATTAATCAAGAACGAAAGTTAGGGGATCGAAGATGATCAGATAC | 962  |
| Sbjct | 902  | TGCCAAGGACGTTTTTCATTAATCAAGAACGAAAGTTAGGGGATCGAAGATGATCAGATAC | 961  |
| Query | 963  | CGTCGTAGTCTTAACCATAAACTATGCCGACTAGGGATCGGGTGTGTTCTtttttttGAC  | 1022 |
| Sbjct | 962  | CGTCGTAGTCTTAACCATAAACTATGCCGACTAGGGATCGGGTGTGTTCTTTTTTTGAC   | 1021 |
| Query | 1023 | GCACTCGGCACCTTACGAGAAATCAAAGTCTTTGGGTTCTGGGGGAGTATGGTCGCAAG   | 1082 |
| Sbjct | 1022 | GCACTCGGCACCTTACGAGAAATCAAAGTCTTTGGGTTCTGGGGGAGTATGGTCGCAAG   | 1081 |
| Query | 1083 | GCTGAAACTTAAAGGAATTGACGGAAGGGCACCACCAGGAGTGGAGCCTGCGGCTTAATT  | 1142 |
| Sbjct | 1082 | GCTGAAACTTAAAGGAATTGACGGAAGGGCACCACCAGGAGTGGAGCCTGCGGCTTAATT  | 1141 |
| Query | 1143 | TGACTCAACACGGGGAAACTCACCAGGTCCAGACACAATAAGGATTGACAGATTGAGAGC  | 1202 |
| Sbjct | 1142 | TGACTCAACACGGGGAAACTCACCAGGTCCAGACACAATAAGGATTGACAGATTGAGAGC  | 1201 |
| Query | 1203 | TCTTTCTTGATTTTGTGGGTGGTGGTGCATGGCCGTTCTTAGTTGGTGGAGTGATTTGTC  | 1262 |
| Sbjct | 1202 | TCTTTCTTGATTTTGTGGGTGGTGGTGCATGGCCGTTCTTAGTTGGTGGAGTGATTTGTC  | 1261 |
| Query | 1263 | TGCTTAATTGCGATAACGAACGAGACCTTAACCTACTAAATAGTGCTGCTAGCTTTTGCT  | 1322 |
| Sbjct | 1262 | TGCTTAATTGCGATAACGAACGAGACCTTAACCTACTAAATAGTGCTGCTAGCTTTTGCT  | 1321 |
| Query | 1323 | GGTATAGTCACTTCTTAGAGGGACTATCGATTTCAAGTCGATGGAAGTTTGAGGCAATAA  | 1382 |
| Sbjct | 1322 | GGTATAGTCACTTCTTAGAGGGACTATCGATTTCAAGTCGATGGAAGTTTGAGGCAATAA  | 1381 |
| Query | 1383 | CAGGTCTGTGATGCCCTTAGACGTTCTGGGCCGCACGCGCTACACTGACGGAGCCAAC    | 1442 |
| Sbjct | 1382 | CAGGTCTGTGATGCCCTTAGACGTTCTGGGCCGCACGCGCTACACTGACGGAGCCAAC    | 1441 |
| Query | 1443 | GAGTATTAACCTTGGCCGAGAGGTCTGGGAAATCTTGTGAAACTCCGTCGTGCTGGGGAT  | 1502 |

```

Sbjct 1442 GAGTATTAACCTTGGCCGAGAGGTCTGGGAAATCTTGTGAAACTCCGTCGTGCTGGGGAT 1501
Query 1503 AGAGCATTGTAATTATTGCTCTTCAACGAGGAATTCCTAGTAAGCGCAAGTCATCAGCTT 1562
      |||
Sbjct 1502 AGAGCATTGTAATTATTGCTCTTCAACGAGGAATTCCTAGTAAGCGCAAGTCATCAGCTT 1561
Query 1563 GCGTTGATTACGTCCTGCCCTTTGTACACACCGCCCGTCGCTACTACCGATTGAATGGC 1622
      |||
Sbjct 1562 GCGTTGATTACGTCCTGCCCTTTGTACACACCGCCCGTCGCTACTACCGATTGAATGGC 1621
Query 1623 TTAGTGAGGCCTCCGGATTGGTTTAAAGAAGGGGGCAACTCCATCTTGAACCGAAAAGC 1682
      |||
Sbjct 1622 TTAGTGAGGCCTCCGGATTGGTTTAAAGAAGGGGGCAACTCCATCTTGAACCGAAAAGC 1681
Query 1683 TGGTCAAACCTTGGTCATT 1700
      |||
Sbjct 1682 TGGTCAAACCTTGGTCATT 1699

```

>dbj|AB054259.1| Debaryomyces robertsiae gene for 18S rRNA, partial sequence,  
strain: CBS 2934  
Length=1751

Score = 3136 bits (1698), Expect = 0.0  
Identities = 1723/1735 (99%), Gaps = 6/1735 (0%)  
Strand=Plus/Plus

```

Query 3 GCCATGCATGTCTAAGTATAAGCAATTTATACAGTGAAACTGCGAATGGCTCATTAAATC 62
      |||
Sbjct 21 GCCATGCATGTCTAAGTATAAGCAATTTATACAGTGAAACTGCGAATGGCTCATTAAATC 80
Query 63 AGTTATCGTTTATTTGATAGTACCTTTACTACTTGGATAACCGTGGTAATTCTAGAGCTA 122
      |||
Sbjct 81 AGTTATCGTTTATTTGATAGTACCTTTACTACTTGGATAACCGTGGTAATTCTAGAGCTA 140
Query 123 ATACATGCTAAAAATCCCGACTGTTTGAAGGGATGTATTTATTAGATAAAAAATCAATG 182
      |||
Sbjct 141 ATACATGCTAAAAATCCCGACTGTTTGAAGGGATGTATTTATTAGATAAAAAATCAATG 200
Query 183 CT-TTTCGGAGCTCTTTGATGATTCAATAAATTTTCGAATCGCATGGCCTTGTGCTGG 241
      |||
Sbjct 201 CTCTTT--GAGCTCTTTGATGATTCAATAAATTTTCGAATCGCATGGCCTTGTGCTGG 258
Query 242 CGATGGTTCATTCAAATTTCTGCCCTATCAACTTTCGATGGTAGGATAGTGGCCTACCAT 301
      |||
Sbjct 259 CGATGGTTCATTCAAATTTCTGCCCTATCAACTTTCGATGGTAGGATAGTGGCCTACCAT 318
Query 302 GGTTC AACGGGTAACGGGGAATAAGGGTTCGATTCGGAGAGGGAGCCTGAGAAACGGC 361
      |||
Sbjct 319 GGTTC AACGGGTAACGGGGAATAAGGGTTCGATTCGGAGAGGGAGCCTGAGAAACGGC 378
Query 362 TACCACATCCAAGGAAGGCAGCAGGCGCGCAAATTACCCAATCCCGACACGGGGAGGTAG 421
      |||
Sbjct 379 TACCACATCCAAGGAAGGCAGCAGGCGCGCAAATTACCCAATCCCGACACGGGGAGGTAG 438
Query 422 TGACAATAAATAACGATACAGGGCCCTTTCGGGTCTTGTAAATTGGAATGAGTACAATGTA 481
      |||
Sbjct 439 TGACAATAAATAACGATACAGGGCCCTTTCGGGTCTTGTAAATTGGAATGAGTACAATGTA 498
Query 482 AATACCTTAACGAGGAACAATTGGAGGGCAAGTCTGGTGCCAGCAGCCGCGTAATTCCA 541
      |||
Sbjct 499 AATACCTTAACGAGGAACAATTGGAGGGCAAGTCTGGTGCCAGCAGCCGCGTAATTCCA 558
Query 542 GCTCCAATAGCGTATATTAAAGTTGTTGCAGTTAAAAAGCTCGTAGTTGAACCTTGGGCT 601

```

|       |      |                                                                   |      |
|-------|------|-------------------------------------------------------------------|------|
| Sbjct | 559  | <br>GCTCCAATAGCGTATATTAAAGTTGTTGCAGTTAAAAAGCTCGTAGTTGAACCTTGGGCT  | 618  |
| Query | 602  | TGGTTGGCCGGTCCGCCTTTTTGGCGAGTACTGGACCCAACCGAGCCTTTCCTTCTGGCT      | 661  |
| Sbjct | 619  | <br>TGGTTGGCCGGTCCGCCTTTTTGGCGAGTACTGGACCCAACCGAGCCTTTCCTTCTGGCT  | 678  |
| Query | 662  | AACCTTTCGCCCTTGTGGTGTGGCGAACCAGGACTTTTACTTTGAAAAAATTAGAGTG        | 721  |
| Sbjct | 679  | <br>AACCTCTCGCCCTTGTGGCGTTTGGCGAACCAGGACTTTTACTTTGAAAAAATTAGAGTG  | 738  |
| Query | 722  | TTCAAAGCAGGCCTTTGCTCGAATATATTAGCATGGAATAATAGAATAGGACGTTATGGT      | 781  |
| Sbjct | 739  | <br>TTCAAAGCAGGCCTTTGCTCGAATATATTAGCATGGAATAATAGAATAGGACGTTATGGT  | 798  |
| Query | 782  | TCTATTTTGTGGTTTCTAGGACCATCGTAATGATTAATAGGGACGGTCGGGGGCATCAG       | 841  |
| Sbjct | 799  | <br>TCTATTTTGTGGTTTCTAGGACCATCGTAATGATTAATAGGGACGGTCGGGGGCATCAG   | 858  |
| Query | 842  | TATTCAGTTGTCAGAGGTGAAATTCTTGGATT-ACCTGAAGACTAACTACTGCGAAAGCA      | 900  |
| Sbjct | 859  | <br>TATTCAGTTGTCAGAGGTGAAATTCTTGGATTTAC-TGAAGACTAACTACTGCGAAAGCA  | 917  |
| Query | 901  | TTTGCCAAGGACGTTTTTCATTAATCAAGAACGAAAGTTAGGGGATCGAAGATGATCAGAT     | 960  |
| Sbjct | 918  | <br>TTTGCCAAGGACGTTTTTCATTAATCAAGAACGAAAGTTAGGGGATCGAAGATGATCAGAT | 977  |
| Query | 961  | ACCGTCGTAGTCTTAACCATAAACTATGCCGACTAGGGATCGGGTGTGGTTCTtttttttG     | 1020 |
| Sbjct | 978  | <br>ACCGTCGTAGTCTTAACCATAAACTATGCCGACTAGGGATCGGGTGTGGTTCTTTTTTTTG | 1037 |
| Query | 1021 | ACGCACTCGGCACCTTACGAGAAATCAAAGTCTTTGGGTTCTGGGGGAGTATGGTCGCA       | 1080 |
| Sbjct | 1038 | <br>ACGGACTCGGCACCTTACGAGAAATCAAAGTCTTTGGGTTCTGGGGGAGTATGGTCGCA   | 1097 |
| Query | 1081 | AGGCTGAAACTTAAAGGAATTGACGGAAGGGCACCACCAGGAGTGGAGCCTGCGGCTTAA      | 1140 |
| Sbjct | 1098 | <br>AGGCTGAAACTTAAAGGAATTGACGGAAGGGCACCACCAGGAGTGG-GACTGCGGCTTAA  | 1156 |
| Query | 1141 | TTTGA CTCAACACGGGGAAACTCACCAGGTCCAGACACAATAAGGATTGACAGATTGAGA     | 1200 |
| Sbjct | 1157 | <br>TTTGA CTCAACACGGGGAAACTCACCAGGTCCAGACACAATAAGGATTGACAGATTGAGA | 1216 |
| Query | 1201 | GCTCTTTCTTGATTTTGTGGGTGGTGGTGCATGGCCGTTCTTAGTTGGTGGAGTGATTTG      | 1260 |
| Sbjct | 1217 | <br>GCTCTTTCTTGATTTTGTGGGTGGTGGTGCATGGCCGTTCTTAGTTGGTGGAGTGATTTG  | 1276 |
| Query | 1261 | TCTGCTTAATTGCGATAACGAACGAGACCTTAACCTACTAAATAGTGCTGCTAGCTTTTG      | 1320 |
| Sbjct | 1277 | <br>TCTGCTTAATTGNNATAACGAACGAGACCTTAACCTACTAAATAGTGCTGCTAGCTTTTG  | 1336 |
| Query | 1321 | CTGGTATAGTCACTTCTTAGAGGGACTATCGATTTCAAGTCGATGGAAGTTTGAGGCAAT      | 1380 |
| Sbjct | 1337 | <br>CTGGTATAGTCACTTCTTAGAGGGACTATCGATTTCAAGTCGATGGAAGTTTGAGGCAAT  | 1396 |
| Query | 1381 | AACAGGTCTGTGATGCCCTTAGACGTTCTGGGCCGCACGCGCTACACTGACGGAGCCA        | 1440 |
| Sbjct | 1397 | <br>AACAGGTCTGTGATGCCCTTAGACGTTCTGGGCCGCACGCGCTACACTGACGGAGCCA    | 1456 |
| Query | 1441 | ACGAGTATTAACCTTGGCCGAGAGGTCTGGGAAATCTTGTGAAACTCCGTCTGCTGGGG       | 1500 |
| Sbjct | 1457 | <br>ACGAGTATTAACCTTGGCCGAGAGGTCTGGGAAATCTTGTGAAACTCCGTCTGCTGGGG   | 1516 |
| Query | 1501 | ATAGAGCATTGTAATTATTGCTCTTCAACGAGGAATTCCTAGTAAGCGCAAGTCATCAGC      | 1560 |

```

Sbjct 1517 |||||ATAGAGCATTGTAATTATTGCTCTTCAACGAGGAATTCCTAGTAAGCGCAAGTCATCAGC 1576
Query 1561 TTGCGTTGATTACGTCCCTGCCCTTTGTACACACCGCCCGTCGCTACTACCGATTGAATG 1620
Sbjct 1577 |||||TTGCGTTGATTACGTCCCTGCCCTTTGTACACACCGCCCGTCGCTACTACCGATTGAATG 1636
Query 1621 GCTTAGTGAGGCCTCCGGATTGGTTTAAAGAAGGGGGCAACTCCATCTTGAACCGAAAA 1680
Sbjct 1637 |||||GCTTAGTGAGGCCTCCGGATTGGTTTAAAGAAGGGGGCAACTCCATCTTGAACCGAAAA 1696
Query 1681 GCTGGTCAAACCTTGGTCATTTAGAGGAAGTAAAAGTCGTAACAAGGTTTCCGTAG 1735
Sbjct 1697 |||||GCTGGTCAAACCTTGGTCATTTAGAGGAAGTAAAAGTCGTAACAAGGTTTCCGTAG 1751

```

>dbj|AB070856.1| Marine yeast Y5318 gene for 18S rRNA, partial sequence  
Length=1751

Score = 3136 bits (1698), Expect = 0.0  
Identities = 1719/1728 (99%), Gaps = 5/1728 (0%)  
Strand=Plus/Plus

```

Query 3 GCCATGCATGTCTAAGTATAAGCAATTTATACAGTGAAACTGCGAATGGCTCATTAAATC 62
Sbjct 27 |||||GCCATGCATGTCTAAGTATAAGCAATTTATACAGTGAAACTGCGAATGGCTCATTAAATC 86
Query 63 AGTTATCGTTTATTTGATAGTACCTTTACTACTTGGATAACCGTGGTAATTCTAGAGCTA 122
Sbjct 87 |||||AGTTATCGTTTATTTGATAGTACCTTTACTACTTGGATAACCGTGGTAATTCTAGAGCTA 146
Query 123 ATACATGCTAAAAATCCCGACTGTTTGAAGGGATGTATTTATTAGATAAAAAATCAATG 182
Sbjct 147 |||||ATACATGCTAAAAATCCCGACTGTTTGAAGGGATGTATTTATTAGATAAAAAATCAATG 206
Query 183 CT-TTTCGGAGCTCTTTGATGATTCAATAAATTTTCGAATCGCATGGCCTTGTGCTGG 241
Sbjct 207 |||||CTCTTT--GAGCTCTTTGATGATTCAATAAATTTTCGAATCGCATGGCCTTGTGCTGG 264
Query 242 CGATGGTTCATTCAAATTTCTGCCCTATCAACTTTCGATGGTAGGATAGTGGCCTACCAT 301
Sbjct 265 |||||CGATGGTTCATTCAAATTTCTGCCCTATCAACTTTCGATGGTAGGATAGTGGCCTACCAT 324
Query 302 GGTTC AACGGGTAACGGGGAATAAGGGTTCGATCCGGAGAGGGAGCCTGAGAAACGGC 361
Sbjct 325 |||||GGTTC AACGGGTAACGGGGAATAAGGGTTCGATCCGGAGAGGGAGCCTGAGAAACGGC 384
Query 362 TACCACATCCAAGGAAGGCAGCAGGCGCGCAAATTACCCAATCCCGACACGGGGAGGTAG 421
Sbjct 385 |||||TACCACATCCAAGGAAGGCAGCAGGCGCGCAAATTACCCAATCCCGACACGGGGAGGTAG 444
Query 422 TGACAATAAATAACGATACAGGGCCCTTTCGGGTCTTGTAATTGGAATGAGTACAATGTA 481
Sbjct 445 |||||TGACAATAAATAACGATACAGGGCCCTTTCGGGTCTTGTAATTGGAATGAGTACAATGTA 504
Query 482 AATACCTTAACGAGGAACAATTGGAGGGCAAGTCTGGTGCCAGCAGCCGCGTAATTCCA 541
Sbjct 505 |||||AATACCTTAACGAGGAACAATTGGAGGGCAAGTCTGGTGCCAGCAGCCGCGTAATTCCA 564
Query 542 GCTCCAATAGCGTATATTAAGTTGTTGCAGTTAAAAGCTCGTAGTTGAACCTTGGGCT 601
Sbjct 565 |||||GCTCCAATAGCGTATATTAAGTTGTTGCAGTTAAAAGCTCGTAGTTGAACCTTGGGCT 624
Query 602 TGTTTGGCCGGTCCGCCTTTTTGGCGAGTACTGGACCCAACCGAGCCTTTCCTTCTGGCT 661

```



|       |      |                                                                   |      |
|-------|------|-------------------------------------------------------------------|------|
| Sbjct | 625  | <br>TGGTTGGCCGGTCCGCCTTTTTGGCGAGTACTGGACCCAACCGAGCCTTTCCTTCTGGCT  | 684  |
| Query | 662  | AACCTTTCGCCCTTGTGGTGTGGCGAACCAGGACTTTTACTTTGAAAAAATTAGAGTG        | 721  |
| Sbjct | 685  | <br>AACCATTCGCCCTTGTGGTGTGGCGAACCAGGACTTTTACTTTGAAAAAATTAGAGTG    | 744  |
| Query | 722  | TTCAAAGCAGGCCTTTGCTCGAATATATTAGCATGGAATAATAGAATAGGACGTTATGGT      | 781  |
| Sbjct | 745  | <br>TTCAAAGCAGGCCTTTGCTCGAATATATTAGCATGGAATAATAGAATAGGACGTTATGGT  | 804  |
| Query | 782  | TCTATTTTGTGGTTTCTAGGACCATCGTAATGATTAATAGGGACGGTCGGGGGCATCAG       | 841  |
| Sbjct | 805  | <br>TCTATTTTGTGGTTTCTAGGACCATCGTAATGATTAATAGGGACGGTCGGGGGCATCAG   | 864  |
| Query | 842  | TATTCAGTTGTCAGAGGTGAAATTCTTGGA-TTACCTGAAGACTAACTACTGCGAAAGCA      | 900  |
| Sbjct | 865  | <br>TATTCAGTTGTCAGAGGTGAAATTCTTAGATTTA-CTGAAGACTAACTACTGCGAAAGCA  | 923  |
| Query | 901  | TTTGCCAAGGACGTTTTTCATTAATCAAGAACGAAAGTTAGGGGATCGAAGATGATCAGAT     | 960  |
| Sbjct | 924  | <br>TTTGCCAAGGACGTTTTTCATTAATCAAGAACGAAAGTTAGGGGATCGAAGATGATCAGAT | 983  |
| Query | 961  | ACCGTCGTAGTCTTAACCATAAACTATGCCGACTAGGGATCGGGTGTGTTCTtttttttG      | 1020 |
| Sbjct | 984  | <br>ACCGTCGTAGTCTTAACCATAAACTATGCCGACTAGGGATCGGGTGTGTTCTTTTTTTTG  | 1043 |
| Query | 1021 | ACGCACTCGGCACCTTACGAGAAATCAAAGTCTTTGGGTTCTGGGGGGAGTATGGTCGCA      | 1080 |
| Sbjct | 1044 | <br>ACGCACTCGGCACCTTACGAGAAATCAAAGTCTTTGGGTTCTGGGGGGAGTATGGTCGCA  | 1103 |
| Query | 1081 | AGGCTGAAACTTAAAGGAATTGACGGAAGGGCACCACCAGGAGTGGAGCCTGCGGCTTAA      | 1140 |
| Sbjct | 1104 | <br>AGGCTGAAACTTAAAGGAATTGACGGAAGGGCACCACCAGGAGTGGAGCCTGCGGCTTAA  | 1163 |
| Query | 1141 | TTTGA CTCAACACGGGGAAACTCACCAGGTCCAGACACAATAAGGATTGACAGATTGAGA     | 1200 |
| Sbjct | 1164 | <br>TTTGA CTCAACACGGGGAAACTCACCAGGTCCAGACACAATAAGGATTGACAGATTGAGA | 1223 |
| Query | 1201 | GCTCTTTCTTGATTTTGTGGGTGGTGGTGCATGGCCGTTCTTAGTTGGTGGAGTGATTTG      | 1260 |
| Sbjct | 1224 | <br>GCTCTTTCTTGATTTTGTGGGTGGTGGTGCATGGCCGTTCTTAGTTGGTGGAGTGATTTG  | 1283 |
| Query | 1261 | TCTGCTTAATTGCGATAACGAACGAGACCTTAACCTACTAAATAGTGCTGCTAGCTTTTG      | 1320 |
| Sbjct | 1284 | <br>TCTGCTTAATTGCGATAACGAACGAGACCTTAACCTACTAAATAGTGCTGCTAGCTTTTG  | 1343 |
| Query | 1321 | CTGGTATAGTCACTTCTTAGAGGGACTATCGATTTCAAGTCGATGGAAGTTTGAGGCAAT      | 1380 |
| Sbjct | 1344 | <br>CTGGTATAGTCACTTCTTAGAGGGACTATCGATTTCAAGTCGATGGAAGTTTGAGGCAAT  | 1403 |
| Query | 1381 | AACAGGTCTGTGATGCCCTTAGACGTTCTGGGCCGCACGCGCTACACTGACGGAGCCA        | 1440 |
| Sbjct | 1404 | <br>AACAGGTCTGTGATGCCCTTAGACGTTCTGGGCCGCACGCGCTACACTGACGGAGCCA    | 1463 |
| Query | 1441 | ACGAGTATTAACCTTGGCCGAGAGGTCTGGGAAATCTTGTGAAACTCCGTCGTGCTGGGG      | 1500 |
| Sbjct | 1464 | <br>ACGAGTATTAACCTTGGCCGAGAGGTCTGGGAAATCTTGTGAAACTCCGTCGTGCTGGGG  | 1523 |
| Query | 1501 | ATAGAGCATTGTAATTATTGCTCTTCAACGAGGAATTCCTAGTAAGCGCAAGTCATCAGC      | 1560 |
| Sbjct | 1524 | <br>ATAGAGCATTGTAATTATTGCTCTTCAACGAGGAATTCCTAGTAAGCGCAAGTCATCAGC  | 1583 |
| Query | 1561 | TTGCGTTGATTACGTCCCTGCCCTTTGTACACACCGCCGTCGCTACTACCGATTGAATG       | 1620 |

```

Sbjct 1584 |||||TTGCGTTGATTACGTCCCTGCCCTTTGTACACACCGCCCGTTCGCTACTACCGATTGAATG 1643
Query 1621 GCTTAGTGAGGCCTCCGGATTGGTTTAAAGAAGGGGGCAACTCCATCTTGAACCGAAAA 1680
Sbjct 1644 |||||GCTTAGTGAGGCCTCCGGATTGGTTTAAAGAAGGGGGCAACTCCATCTTGAACCGAAAA 1703
Query 1681 GCTGGTCAAACCTTGGTCATTTAGAGGAAGTAAAAGTCGTAACAAGGTT 1728
Sbjct 1704 |||||GCTGGTCAAACCTTGGTCATTTAGAGGAAGTAAAAGTCGTAACAAGGTT 1751

```

>dbj|AB106351.1| Debaryomyces hansenii gene for 18S rRNA, partial sequence  
Length=1751

Score = 3136 bits (1698), Expect = 0.0  
Identities = 1719/1728 (99%), Gaps = 5/1728 (0%)  
Strand=Plus/Plus

```

Query 3 GCCATGCATGTCTAAGTATAAGCAATTTATACAGTGAAACTGCGAATGGCTCATTAAATC 62
Sbjct 27 |||||GCCATGCATGTCTAAGTATAAGCAATTTATACAGTGAAACTGCGAATGGCTCATTAAATC 86
Query 63 AGTTATCGTTTATTTGATAGTACCTTTACTACTTGGATAACCGTGGTAATTCTAGAGCTA 122
Sbjct 87 |||||AGTTATCGTTTATTTGATAGTACCTTTACTACTTGGATAACCGTGGTAATTCTAGAGCTA 146
Query 123 ATACATGCTAAAAATCCCGACTGTTTGGGAAGGGATGTATTTATTAGATAAAAAATCAATG 182
Sbjct 147 |||||ATACATGCTAAAAATCCCGACTGTTTGGGAAGGGATGTATTTATTAGATAAAAAATCAATG 206
Query 183 CT-TTTCGGAGCTCTTTGATGATTCAATAAATTTTCGAATCGCATGGCCTTGTGCTGG 241
Sbjct 207 |||||CTCTTT--GAGCTCTTTGATGATTCAATAAATTTTCGAATCGCATGGCCTTGTGCTGG 264
Query 242 CGATGGTTCATTCAAATTTCTGCCCTATCAACTTTCGATGGTAGGATAGTGGCCTACCAT 301
Sbjct 265 |||||CGATGGTTCATTCAAATTTCTGCCCTATCAACTTTCGATGGTAGGATAGTGGCCTACCAT 324
Query 302 GGTTCACCGGGTAACGGGGAATAAGGGTTCGATCCGGAGAGGGAGCCTGAGAAACGGC 361
Sbjct 325 |||||GGTTCACCGGGTAACGGGGAATAAGGGTTCGATCCGGAGAGGGAGCCTGAGAAACGGC 384
Query 362 TACCACATCCAAGGAAGGCAGCAGGCGCGCAAATTACCCAATCCCGACACGGGGAGGTAG 421
Sbjct 385 |||||TACCACATCCAAGGAAGGCAGCAGGCGCGCAAATTACCCAATCCCGACACGGGGAGGTAG 444
Query 422 TGACAATAAATAACGATACAGGGCCCTTTCGGGTCTTGTAATTGGAATGAGTACAATGTA 481
Sbjct 445 |||||TGACAATAAATAACGATACAGGGCCCTTTCGGGTCTTGTAATTGGAATGAGTACAATGTA 504
Query 482 AATACCTTAACGAGGAACAATTGGAGGGCAAGTCTGGTGCCAGCAGCCGCGTAATTCCA 541
Sbjct 505 |||||AATACCTTAACGAGGAACAATTGGAGGGCAAGTCTGGTGCCAGCAGCCGCGTAATTCCA 564
Query 542 GCTCCAATAGCGTATATTAAGTTGTTGCAGTTAAAAGCTCGTAGTTGAACCTTGGGCT 601
Sbjct 565 |||||GCTCCAATAGCGTATATTAAGTTGTTGCAGTTAAAAGCTCGTAGTTGAACCTTGGGCT 624
Query 602 TGTTTGGCCGGTCCGCCTTTTTGGCGAGTACTGGACCAACCGAGCCTTTCCTTCTGGCT 661
Sbjct 625 |||||TGTTTGGCCGGTCCGCCTTTTTGGCGAGTACTGGACCAACCGAGCCTTTCCTTCTGGCT 684
Query 662 AACCTTTCGCCCTTGTGGTGTGGCGAACCAGGACTTTTACTTTGAAAAAATTAGAGTG 721

```



```

Sbjct 1644 |||||GCTTAGTGAGGCCTCCGGATTGGTTTAAAGAAGGGGGCAACTCCATCTTGAACCGAAAA 1703
Query 1681 GCTGGTCAAACCTTGGTCATTTAGAGGAAGTAAAAGTCGTAACAAGGTT 1728
Sbjct 1704 |||||GCTGGTCAAACCTTGGTCATTTAGAGGAAGTAAAAGTCGTAACAAGGTT 1751

```

>emb|AJ508273.1| *Debaryomyces hansenii* partial 18S rRNA gene, strain CBS 789T  
Length=1710

Score = 3134 bits (1697), Expect = 0.0  
Identities = 1707/1712 (99%), Gaps = 3/1712 (0%)  
Strand=Plus/Plus

```

Query 18 GTATAAGCAATTTATACAGTGAAACTGCGAATGGCTCATTAAATCAGTTATCGTTTATTT 77
Sbjct 1 GTATAAGCAATTTATACAGTGAAACTGCGAATGGCTCATTAAATCAGTTATCGTTTATTT 60

Query 78 GATAGTACCTTTACTACTTGGATAAACCGTGGTAATTCTAGAGCTAATACATGCTAAAAAT 137
Sbjct 61 GATAGTACCTTTACTACTTGGATAAACCGTGGTAATTCTAGAGCTAATACATGCTAAAAAT 120

Query 138 CCCGACTGTTTGGGAAGGGATGTATTTATTAGATAAAAAATCAATGCTTTTCGGAGCTCTT 197
Sbjct 121 CCCGACTGTTTGGGAAGGGATGTATTTATTAGATAAAAAATCAATGCTTTTCGGAGCTCTT 180

Query 198 TGATGATTCATAATAACTTTTCGAATCGCATGGCCTTGTGCTGGCGATGGTTCATTCAAA 257
Sbjct 181 TGATGATTCATAATAACTTTTCGAATCGCATGGCCTTGTGCTGGCGATGGTTCATTCAAA 240

Query 258 TTTCTGCCCTATCAACTTTTCGATGGTAGGATAGTGGCCTACCATGGTTTCAACGGGTAAC 317
Sbjct 241 TTTCTGCCCTATCAACTTTTCGATGGTAGGATAGTGGCCTACCATGGTTTCAACGGGTAAC 300

Query 318 GGGGAATAAGGGTTCGATTCCGGAGAGGGAGCCTGAGAAACGGCTACCACATCCAAGGAA 377
Sbjct 301 GGGGAATAAGGGTTCGATTCCGGAGAGGGAGCCTGAGAAACGGCTACCACATCCAAGGAA 360

Query 378 GGCAGCAGGCGCGCAAATTACCCAATCCCGACACGGGGAGGTAGTGACAATAAATAACGA 437
Sbjct 361 GGCAGCAGGCGCGCAAATTACCCAATCCCGACACGGGGAGGTAGTGACAATAAATAACGA 420

Query 438 TACAGGGCCCTTTCGGGTCTTGTAAATTGGAATGAGTACAATGTAAATACCTTAACGAGGA 497
Sbjct 421 TACAGGGCCCTTTCGGGTCTTGTAAATTGGAATGAGTACAATGTAAATACCTTAACGAGGA 480

Query 498 ACAATTGGAGGGCAAGTCTGGTGCCAGCAGCCGCGTAATTCCAGCTCCAATAGCGTATA 557
Sbjct 481 ACAATTGGAGGGCAAGTCTGGTGCCAGCAGCCGCGTAATTCCAGCTCCAATAGCGTATA 540

Query 558 TTAAAGTTGTTGCAGTTAAAAGCTCGTAGTTGAACCTTGGGCTTGGTTGGCCGGTCCGC 617
Sbjct 541 TTAAAGTTGTTGCAGTTAAAAGCTCGTAGTTGAACCTTGGGCTTGGTTGGCCGGTCCGC 600

Query 618 CTTTTTGGCGAGTACTGGACCCAACCGAGCCTTTCCTTCTGGCTAACCTTTCGCCCTTGT 677
Sbjct 601 CTTTTTGGCGAGTACTGGACCCAACCGAGCCTTTCCTTCTGGCTAACCTTTCGCCCTTGT 660

Query 678 GGTGTTTGGCGAACCAGGACTTTTACTTTGAAAAAATTAGAGTGTTCAAAGCAGGCCTTT 737
Sbjct 661 GGTGTTTGGCGAACCAGGACTTTTACTTTGAAAAAATTAGAGTGTTCAAAGCAGGCCTTT 720

Query 738 GCTCGAATATATTAGCATGGAATAATAGAATAGGACGTTATGGTTCTATTTTGTGGTTT 797

```

|       |      |                                                                  |      |
|-------|------|------------------------------------------------------------------|------|
| Sbjct | 721  | <br>GCTCGAATATATTAGCATGGAATAATAGAATAGGACGTTATGGTTCATTTTTGTTGGTTT | 780  |
| Query | 798  | CTAGGACCATCGTAATGATTAATAGGGACGGTCGGGGGCATCAGTATTCAGTTGTCAGAG     | 857  |
| Sbjct | 781  | <br>CTAGGACCATCGTAATGATTAATAGGGACGGTCGGGGGCATCAGTATTCAGTTGTCAGAG | 840  |
| Query | 858  | GTGAAATTCTTGGATT-ACCTGAAGACTAACTACTGCGAAAGCATTTGCCAAGGACGTTT     | 916  |
| Sbjct | 841  | <br>GTGAAATTCTTGGATTTAC-TGAAGACTAACTACTGCGAAAG-ATTTGCCAAGGACGTTT | 898  |
| Query | 917  | TCATTAATCAAGAACGAAAGTTAGGGGATCGAAGATGATCAGATACCGTCGTAGTCTTAA     | 976  |
| Sbjct | 899  | <br>TCATTAATCAAGAACGAAAGTTAGGGGATCGAAGATGATCAGATACCGTCGTAGTCTTAA | 958  |
| Query | 977  | CCATAAACTATGCCGACTAGGGATCGGGTGTGTTCTttttttGACGCACCTCGGCACCTT     | 1036 |
| Sbjct | 959  | <br>CCATAAACTATGCCGACTAGGGATCGGGTGTGTTCTTTTTTTGACGCACCTCGGCACCTT | 1018 |
| Query | 1037 | ACGAGAAATCAAAGTCTTTGGGTTCTGGGGGAGTATGGTCGCAAGGCTGAAACTTAAAG      | 1096 |
| Sbjct | 1019 | <br>ACGAGAAATCAAAGTCTTTGGGTTCTGGGGGAGTATGGTCGCAAGGCTGAAACTTAAAG  | 1078 |
| Query | 1097 | GAATTGACGGAAGGGCACCACCAGGAGTGGAGCCTGCGGCTTAATTTGACTCAACACGGG     | 1156 |
| Sbjct | 1079 | <br>GAATTGACGGAAGGGCACCACCAGGAGTKGAGMCTGCGGCTTAATTTGACTCAACACGGG | 1138 |
| Query | 1157 | GAAACTCACCAGTCCAGACACAATAAGGATTGACAGATTGAGAGCTCTTTCTTGATTTT      | 1216 |
| Sbjct | 1139 | <br>GAAACTCACCAGTCCAGACACAATAAGGATTGACAGATTGAGAGCTCTTTCTTGATTTT  | 1198 |
| Query | 1217 | GTGGGTGGTGGTGCATGGCCGTTCTTAGTTGGTGGAGTGATTTGTCTGCTTAATTGCGAT     | 1276 |
| Sbjct | 1199 | <br>GTGGGTGGTGGTGCATGGCCGTTCTTAGTTGGTGGAGTGATTTGTCTGCTTAATTGCGAT | 1258 |
| Query | 1277 | AACGAACGAGACCTTAACCTACTAAATAGTGCTGCTAGCTTTTGCTGGTATAGTCACTTC     | 1336 |
| Sbjct | 1259 | <br>AACGAACGAGACCTTAACCTACTAAATAGTGCTGCTAGCTTTTGCTGGTATAGTCACTTC | 1318 |
| Query | 1337 | TTAGAGGGACTATCGATTTCAAGTCGATGGAAGTTTGAGGCAATAACAGGTCTGTGATGC     | 1396 |
| Sbjct | 1319 | <br>TTAGAGGGACTATCGATTTCAAGTCGATGGAAGTTTGAGGCAATAACAGGTCTGTGATGC | 1378 |
| Query | 1397 | CCTTAGACGTTCTGGGCCGCACGCGCTACACTGACGGAGCCAACGAGTATTAACCTTG       | 1456 |
| Sbjct | 1379 | <br>CCTTAGACGTTCTGGGCCGCACGCGCTACACTGACGGAGCCAACGAGTATTAACCTTG   | 1438 |
| Query | 1457 | GCCGAGAGGTCTGGGAAATCTTGTGAAACTCCGTCGTGCTGGGGATAGAGCATTGTAATT     | 1516 |
| Sbjct | 1439 | <br>GCCGAGAGGTCTGGGAAATCTTGTGAAACTCCGTCGTGCTGGGGATAGAGCATTGTAATT | 1498 |
| Query | 1517 | ATTGCTCTTCAACGAGGAATTCTAGTAAGCGCAAGTCATCAGCTTGCCTTGATTACGTC      | 1576 |
| Sbjct | 1499 | <br>ATTGCTCTTCAACGAGGAATTCTAGTAAGCGCAAGTCATCAGCTTGCCTTGATTACGTC  | 1558 |
| Query | 1577 | CCTGCCCTTTGTACACACCGCCCGTCGCTACTACCGATTGAATGGCTTAGTGAGGCCTCC     | 1636 |
| Sbjct | 1559 | <br>CCTGCCCTTTGTACACACCGCCCGTCGCTACTACCGATTGAATGGCTTAGTGAGGCCTCC | 1618 |
| Query | 1637 | GGATTGGTTTAAAGAAGGGGGCAACTCCATCTTGAACCGAAAAGCTGGTCAAACCTGGT      | 1696 |
| Sbjct | 1619 | <br>GGATTGGTTTAAAGAAGGGGGCAACTCCATCTTGAACCGAAAAGCTGGTCAAACCTGGT  | 1678 |
| Query | 1697 | CATTTAGAGGAAGTAAAAGTCGTAACAAGGTT 1728                            |      |

Sbjct 1679 |||...||| CATTTAGAGGAAAGTAAAAGTCGTAACAAGGTT 1710

>dbj|AB054268.1| Debaryomyces udonii gene for 18S rRNA, partial sequence, strain:JCM 7885 Length=1751

Score = 3133 bits (1696), Expect = 0.0 Identities = 1723/1736 (99%), Gaps = 8/1736 (0%) Strand=Plus/Plus

Query 3 GCCATGCATGTCTAAGTATAAGCAATTTATACAGTGAAACTGCGAATGGCTCATTAAATC 62
Sbjct 21 GCCATGCATGTCTAAGTATAAGCAATTTATACAGTGAAACTGCGAATGGCTCATTAAATC 80
Query 63 AGTTATCGTTTATTTGATAGTACCTTTACTACTTGGATAACCGTGGTAATTCTAGAGCTA 122
Sbjct 81 AGTTATCGTTTATTTGATAGTACCTTTACTACTTGGATAACCGTGGTAATTCTAGAGCTA 140
Query 123 ATACATGCTAAAAATCCCGACTGTTTGAAGGGATGTATTTATTAGATAAAAAATCAATG 182
Sbjct 141 ATACATGCTAAAAATCCCGACTGTTTGAAGGGATGTATTTATTAGATAAAAAATCAATG 200
Query 183 CT-TTTCGGAGCTCTTTGATGATTCAATAAATTTTCGAATCGCATGGCCTTGTGCTGG 241
Sbjct 201 CTCTTT--GAGCTCTTTGATGATTCAATAAATTTTCGAATCGCATGGCCTTGTGCTGG 258
Query 242 CGATGGTTCATTCAAATTTCTGCCCTATCAACTTTCGATGGTAGGATAGTGGCCTACCAT 301
Sbjct 259 CGATGGTTCATTCAAATTTCTGCCCTATCAACTTTCGATGGTAGGATAGTGGCCTACCAT 318
Query 302 GGTTC AACGGGTAACGGGGAATAAGGGTTCGATCCGGAGAGGGAGCCTGAGAAACGGC 361
Sbjct 319 GGTTC AACGGGTAACGGGGAATAAGGGTTCGATCCGGAGAGGGAGCCTGAGAAACGGC 378
Query 362 TACCACATCCAAGGAAGGCAGCAGGCGCGCAAATTACCCAATCCCGACACGGGGAGGTAG 421
Sbjct 379 TACCACATCCAAGGAAGGCAGCAGGCGCGCAAATTACCCAATCCCGACACGGGGAGGTAG 438
Query 422 TGACAATAAATAACGATACAGGGCCCTTTCGGGTCTTGTAATTGGAATGAGTACAATGTA 481
Sbjct 439 TGACAATAAATAACGATACAGGG-CCTTTCGGGTCTTGTAATTGGAATGAGTACAATGTA 497
Query 482 AATACCTTAACGAGGAACAATTGGAGGGCAAGTCTGGTGCCAGCAGCCGCGTAATTCCA 541
Sbjct 498 AATACCTTAACGAGGAACAATTGGAGGGCAAGTCTGGTGCCAGCAGCCGCGTAATTCCA 557
Query 542 GCTCCAATAGCGTATATTAAGTTGTTGCAGTTAAAAAGCTCGTAGTTGAACCTTGGGCT 601
Sbjct 558 GCTCCAATAGCGTATATTAAGTTGTTGCAGTTAAAAAGCTCGTAGTTGAACCTTGGGTT 617
Query 602 TGTTGGCCGGTCCGCCTTTTTGGCGAGTACTGGACCAACCGAGCCTTTCCTTCTGGCT 661
Sbjct 618 TGTTGGCCGGTCCGCCTTTTTGGCGAGTACTGGACCAACCGAGCCTTTCCTTCTGGCT 677
Query 662 AACCTTTCGCCCTTGTGGTGTGGCGAACCAGGACTTTTACTTTGAAAAAATTAGAGTG 721
Sbjct 678 AACCTTTCGCCCTTGTGGTGTGGCGAACCAGGACTTTTACTTTGAAAAAATTAGAGTG 737
Query 722 TTCAAAGCAGGCCTTTGCTCGAATATATTAGCATGGAATAATAGAATAGGACGTTATGGT 781
Sbjct 738 TTCAAAGCAGGCCTTTGCTCGAATATATTAGCATGGAATAATAGAATAGGACGTTATGGT 797



>emb|X83819.1| Debaryomyces castellii 18S rRNA gene (NCYC 604)

Length=1804

Score = 3133 bits (1696), Expect = 0.0  
Identities = 1736/1761 (98%), Gaps = 5/1761 (0%)  
Strand=Plus/Plus

|       |     |                                                                |     |
|-------|-----|----------------------------------------------------------------|-----|
| Query | 3   | GCCATGCATGTCTAAGTATAAGCAATTTATACAGTGAAACTGCGAATGGCTCATTAAATC   | 62  |
|       |     |                                                                |     |
| Sbjct | 46  | GCCATGCATGTCTAAGTATAAGCAATTTATACAGTGAAACTGCGAATGGCTCATTAAATC   | 105 |
| Query | 63  | AGTTATCGTTTATTTGATAGTACCTTTACTACTTGGATAACCGTGGTAATTCTAGAGCTA   | 122 |
|       |     |                                                                |     |
| Sbjct | 106 | AGTTATCGTTTATTTGATAGTACCTTTACTACTTGGATAACCGTGGTAATTCTAGAGCTA   | 165 |
| Query | 123 | ATACATGCTAAAAATCCCGACTGTTTGAAGGGATGATTTATTAGATAAAAAATCAATG     | 182 |
|       |     |                                                                |     |
| Sbjct | 166 | ATACATGCTAAAAATCCCGACTGTTTGAAGGGATGATTTATTAGATAAAAAATCAATG     | 225 |
| Query | 183 | CTTTTCGGAGCTCTTTGATGATTATAAATAACTTTTCGAATCGCATGGCCTTGTGCTGGC   | 242 |
|       |     |                                                                |     |
| Sbjct | 226 | CTTTTCGGAGCTCTTTGATGATTATAAATAACTTTTCGAATCGCATGGNNTTGTGCTGGC   | 285 |
| Query | 243 | GATGGTTCATTCAAATTTCTGCCCTATCAACTTTCGATGGTAGGATAGTGGCCTACCATG   | 302 |
|       |     |                                                                |     |
| Sbjct | 286 | GATGGTTCATTCAAATTTCTGCCCTATCAACTTNCGATGGTAGGATAGTGGCCTACCATG   | 345 |
| Query | 303 | GTTTCAACGGGTAACGGGGAATAAGGGTTCGATTCCGGAGAGGGAGCCTGAGAAACGGCT   | 362 |
|       |     |                                                                |     |
| Sbjct | 346 | GTTTCAACGGGTAACGGGGAATAAGGGTTCGATTCCGGAGAGGGAGCCTGAGAAACGGCT   | 405 |
| Query | 363 | ACCACATCCAAGGAAGGCAGCAGGCGCGCAAATTACCCAATCCCGACACGGGGAGGTAGT   | 422 |
|       |     |                                                                |     |
| Sbjct | 406 | ACCACATCCAAGGAAGGCAGCAGGCGCGCAAATTACCCAATCCCGACACGGGGAGGTAGT   | 465 |
| Query | 423 | GACAATAAATAACGATACAGGGCCCTTTTCGGGTCTTGTAAATTGGAATGAGTACAATGTAA | 482 |
|       |     |                                                                |     |
| Sbjct | 466 | GACAATAAATAACGATACAGGG-CCTTTTCGGGTCTTGTAAATTGGAATGAGTACAATGTAA | 524 |
| Query | 483 | ATACCTTAACGAGGAACAATTGGAGGGCAAGTCTGGTGCCAGCAGCCGCGGTAATTCCAG   | 542 |
|       |     |                                                                |     |
| Sbjct | 525 | ATACCTTAACGAGGAACAATTGGAGGGCAAGTCTGGTGCCAGCAGCCGCGGTAATTCCAG   | 584 |
| Query | 543 | CTCCAATAGCGTATATTAAGTTGTTGCAGTTAAAAAGCTCGTAGTTGAACCTTGGGCTT    | 602 |
|       |     |                                                                |     |
| Sbjct | 585 | CTCCAATAGCGTATATTAAGNNNTTGCAGTTAAAAAGCTCGNNNTTGAACCTTGGGCTT    | 644 |
| Query | 603 | GGTTGGCCGGTCCGCCTTTTTGGCGAGTACTGGACCAACCGAGCCTTTCCTTCTGGCTA    | 662 |
|       |     |                                                                |     |
| Sbjct | 645 | GGTTGGCCGGTCCGCCTTTTTGGCNGTACTGGACCAACCGAGCCTTTCCTTCTGGCTA     | 704 |
| Query | 663 | ACCTTTCGCCCTTGTGGTGTGGCGAACCAGGACTTTTACTTTGAAAAAATTAGAGTGT     | 722 |
|       |     |                                                                |     |
| Sbjct | 705 | ACCTCTCGCCCTTGTGGTGTGGCGAACCAGGACTTTTACTTTGAAAAAATTAGAGTGT     | 764 |
| Query | 723 | TCAAAGCAGGCCTTTGCTCGAATATATTAGCATGGAATAATAGAATAGGACGTTATGGTT   | 782 |
|       |     |                                                                |     |
| Sbjct | 765 | TCAAAGCAGGCCTTTGCTCGAATATATTAGCATGGAATAATAGAATAGGACGTTATGGTT   | 824 |
| Query | 783 | CTATTTTGTGGTTTCTAGGACCATCGTAATGATTAATAGGGACGGTCGGGGGCATCAGT    | 842 |
|       |     |                                                                |     |
| Sbjct | 825 | CTATTTTGTGGTTTCTAGGACCATCGTAATGATTAATAGGGACGGTCGGGGGCATCAGT    | 884 |





>dbj|AB054266.1| Debaryomyces yamadae gene for 18S rRNA, partial sequence,  
strain:JCM  
6191  
Length=1752

Score = 3131 bits (1695), Expect = 0.0  
Identities = 1721/1734 (99%), Gaps = 3/1734 (0%)  
Strand=Plus/Plus

|       |     |                                                               |     |
|-------|-----|---------------------------------------------------------------|-----|
| Query | 3   | GCCATGCATGTCTAAGTATAAGCAATTTATACAGTGAAACTGCGAATGGCTCATTAAATC  | 62  |
|       |     |                                                               |     |
| Sbjct | 21  | GCCATGCATGTCTAAGTATAAGCAATTTATACAGTGAAACTGCGAATGGCTCATTAAATC  | 80  |
| Query | 63  | AGTTATCGTTTATTTGATAGTACCTTTACTACTTGGATAACCGTGGTAATTCTAGAGCTA  | 122 |
|       |     |                                                               |     |
| Sbjct | 81  | AGTTATCGTTTATTTGATAGTACCTTTACTACTTGGATAACCGTGGTAATTCTAGAGCTA  | 140 |
| Query | 123 | ATACATGCTAAAAATCCCGACTGTTTGAAGGGATGTATTTATTAGATAAAAAATCAATG   | 182 |
|       |     |                                                               |     |
| Sbjct | 141 | ATACATGCTAAAAATCCCGACTGTTTGAAGGGATGTATTTATTAGATAAAAAATCAATG   | 200 |
| Query | 183 | CTTTTCGGAGCTCTTTGATGATTATAAATAACTTTTCGAATCGCATGGCCTTGTGCTGGC  | 242 |
|       |     |                                                               |     |
| Sbjct | 201 | CTTTTCGGAGCTCTTTGATGATTATAAATAACTTTTCGAATCGCATGGCCTTGTGCTGGC  | 260 |
| Query | 243 | GATGGTTCATTCAAATTTCTGCCCTATCAACTTTCGATGGTAGGATAGTGGCCTACCATG  | 302 |
|       |     |                                                               |     |
| Sbjct | 261 | GATGGTTCATTCAAATTTCTGCCCTATCAACTTTCGATGGTAGGATAGTGGCCTACCATG  | 320 |
| Query | 303 | GTTTCAACGGGTAACGGGGAATAAGGGTTCGATTCCGGAGAGGGAGCCTGAGAAACGGCT  | 362 |
|       |     |                                                               |     |
| Sbjct | 321 | GTTTCAACGGGTAACGGGGAATAAGGGTTCGATTCCGGAGAGGGAGCCTGAGAAACGGCT  | 380 |
| Query | 363 | ACCACATCCAAGGAAGGCAGCAGGCGCGCAAATTACCCAATCCCGACACGGGGAGGTAGT  | 422 |
|       |     |                                                               |     |
| Sbjct | 381 | ACCACATCCAAGGAAGGCAGCAGGCGCGCAAATTACCCAATCCCGACACGGGGAGGTAGT  | 440 |
| Query | 423 | GACAATAAATAACGATACAGGGCCCTTTCGGGTCTTGTAAATTGGAATGAGTACAATGTAA | 482 |
|       |     |                                                               |     |
| Sbjct | 441 | GACAATAAATAACGATACAGGGCCCTTTCGGGTCTTGTAAATTGGAATGAGTACAATGTAA | 500 |
| Query | 483 | ATACCTTAACGAGGAACAATTGGAGGGCAAGTCTGGTGCCAGCAGCCGCGTAATTCCAG   | 542 |
|       |     |                                                               |     |
| Sbjct | 501 | ATACCTTAACGAGGAACAATTGGAGGGCAAGTCTGGTGCCAGCAGCCGCGTAATTCCAG   | 560 |
| Query | 543 | CTCCAATAGCGTATATTAAGTTGTTGCAGTTAAAAAGCTCGTAGTTGAACCTTGGGCTT   | 602 |
|       |     |                                                               |     |
| Sbjct | 561 | CTCCAATAGCGTATATTAAGTTGTTGCAGTTAAAAAGCTCGTAGTTGAACCTTGGGCTT   | 620 |
| Query | 603 | GGTTGGCCGGTCCGCCTTTTTGGCGAGTACTGGACCAACCGAGCCTTTCCTTCTGGCTA   | 662 |
|       |     |                                                               |     |
| Sbjct | 621 | GGTTGGCCGGTCCGCCTTTTTGGCGAGTACTGGACCAACCGAGCCTTTCCTTCTGGCTA   | 680 |
| Query | 663 | ACCTTTCGCCCTTGTGGTGTGGCGAACCAGGACTTTTACTTTGAAAAAATTAGAGTGT    | 722 |
|       |     |                                                               |     |
| Sbjct | 681 | ACCTTTCGCCCTTGTGGTGTGGCGAACCAGGACTTTTACTTTGAAAAAATTAGAGTGT    | 740 |
| Query | 723 | TCAAAGCAGGCCTTTGCTCGAATATATTAGCATGGAATAATAGAATAGGACGTTATGGTT  | 782 |
|       |     |                                                               |     |
| Sbjct | 741 | TCAAAGCAGGCCTTTGCTCGAATATATTAGCATGGAATAATAGAATAGGACGTTATGGTT  | 800 |
| Query | 783 | CTATTTTGTGGTTTCTAGGACCATCGTAATGATTAATAGGGACGGTCGGGGGCATCAGT   | 842 |

|       |      |                                                                   |      |
|-------|------|-------------------------------------------------------------------|------|
| Sbjct | 801  | <br>CTATTTTGTGGTTTCTAGGACCATCGTAATGATTAATAGGGACGGTCGGGGGCATCAGT   | 860  |
| Query | 843  | ATTCAGTTGTCAGAGGTGAAATTCTTGGATT-ACCTGAAGACTAACTACTGCGAAAGCAT      | 901  |
| Sbjct | 861  | <br>ATTCAGTTGTCAGAGGTGAAATTCTTGGATTAC-TGAAGACTAACTACTGCGAAAGCAT   | 919  |
| Query | 902  | TTGCCAAGGACGTTTTTCATTAATCAAGAACGAAAGTTAGGGGATCGAAGATGATCAGATA     | 961  |
| Sbjct | 920  | <br>TTGCCAAGGACGTTTTTCATTAATCAAGAACGAAAGTTAGGGGATCGAAGATGATCAGATA | 979  |
| Query | 962  | CCGTCGTAGTCTTAACCATAAACTATGCCGACTAGGGATCGGGTGTGTTCTtttttttGA      | 1021 |
| Sbjct | 980  | <br>CCGTCGTAGTCTTAACCATAAACTATGCCGACTAGGGATCGGGTGTGTTCTTTTTTTGA   | 1039 |
| Query | 1022 | CGCACTCGGCACCTTACGAGAAATCAAAGTCTTTGGGTTCTGGGGGAGTATGGTCGCAA       | 1081 |
| Sbjct | 1040 | <br>CGCACTCGGCACCTTACGAGAAATCAAAGTCTTTGGGTTCTGGGGGAGTATGGTCGCAA   | 1099 |
| Query | 1082 | GGCTGAAACTTAAAGGAATTGACGGAAGGGCACCACCAGGAGTGGAGCCTGCGGCTTAAT      | 1141 |
| Sbjct | 1100 | <br>GGCTGAAACTTAAAGGAATTGACGGAAGGGCACCACCAGGAGTGG-GACTGCGGCTTAAT  | 1158 |
| Query | 1142 | TTGACTCAACACGGGGAAACTCACCAGGTCCAGACACAATAAGGATTGACAGATTGAGAG      | 1201 |
| Sbjct | 1159 | <br>TTGACTCAACACGGGGAAACTCACCAGGTCCAGACACAATAAGGATTGACAGATTGAGAG  | 1218 |
| Query | 1202 | CTCTTTCTTGATTTTGTGGGTGGTGGTGCATGGCCGTTCTTAGTTGGTGGAGTGATTTGT      | 1261 |
| Sbjct | 1219 | <br>CTCTTTCTTGATTTTGTGGGTGGTGGTGCATGGCCGTTCTTAGTTGGTGGAGTGATTTGT  | 1278 |
| Query | 1262 | CTGCTTAATTGCGATAACGAACGAGACCTTAACCTACTAAATAGTGCTGCTAGCTTTTGC      | 1321 |
| Sbjct | 1279 | <br>CTGCTTAATTNNGATAACGAACGAGACCTTAACCTACTAAATAGTGCTGCTAGCTTAGGC  | 1338 |
| Query | 1322 | TGGTATAGTCACTTCTTAGAGGGACTATCGATTTCAAGTCGATGGAAGTTTGAGGCAATA      | 1381 |
| Sbjct | 1339 | <br>TGGTATAGTCACTTCTTAGAGGGACTATCGATTTCAAGTCGATGGAAGTTTGAGGCAATA  | 1398 |
| Query | 1382 | ACAGGTCTGTGATGCCCTTAGACGTTCTGGGCCGCACGCGCTACACTGACGGAGCCAA        | 1441 |
| Sbjct | 1399 | <br>ACAGGTCTGTGATGCCCTTAGACGTTCTGGGCCGCACGCGCTACACTGACGGAGCCAG    | 1458 |
| Query | 1442 | CGAGTATTAACCTTGCCGAGAGGTCTGGGAAATCTTGTGAAACTCCGTCGTGCTGGGGA       | 1501 |
| Sbjct | 1459 | <br>CGAGTATTAACCTTGCCGAGAGGTCTGGGAAATCTTGTGAAACTCCGTCGTGCTGGGGA   | 1518 |
| Query | 1502 | TAGAGCATTGTAATTATTGCTCTTCAACGAGGAATTCCTAGTAAGCGCAAGTCATCAGCT      | 1561 |
| Sbjct | 1519 | <br>TAGAGCATTGTAATTATTGCTCTTCAACGAGGAATTCCTAGTAAGCGCAAGTCATCAGCT  | 1578 |
| Query | 1562 | TGCGTTGATTACGTCCCTGCCCTTTGTACACACCGCCCGTCGCTACTACCGATTGAATGG      | 1621 |
| Sbjct | 1579 | <br>TGCGTTGATTACGTCCCTGCCCTTTGTACACACCGCCCGTCGCTACTACCGATTGAATGG  | 1638 |
| Query | 1622 | CTTAGTGAGGCCTCCGGATTGGTTTAAAGAAGGGGGCAACTCCATCTTGGAACCGAAAAG      | 1681 |
| Sbjct | 1639 | <br>CTTAGTGAGGCCTCCGGATTGGTTTAAAGAAGGGGGCAACTCCATCTTGGAACCGAAAAG  | 1698 |
| Query | 1682 | CTGGTCAAACCTGGTCAATTTAGAGGAAGTAAAAGTCGTAACAAGGTTTCCGTAG           | 1735 |
| Sbjct | 1699 | <br>CTGGTCAAACCTGGTCAATTTAGAGGAAGTAAAAGTCGTAACAAGGTTTCCGTAG       | 1752 |



|       |      |                                                               |      |
|-------|------|---------------------------------------------------------------|------|
| Query | 843  | ATTCAGTTGTCAGAGGTGAAATTCTTGGATT-ACCTGAAGACTAACTACTGCGAAAGCAT  | 901  |
|       |      |                                                               |      |
| Sbjct | 848  | ATTCAGTTGTCAGAGGTGAAATTCTTGGATTAC-TGAAGACTAACTACTGCGAAAGCAT   | 906  |
| Query | 902  | TTGCCAAGGACGTTTTTCATTAATCAAGAACGAAAGTTAGGGGATCGAAGATGATCAGATA | 961  |
|       |      |                                                               |      |
| Sbjct | 907  | TTGCCAAGGACGTTTTTCATTAATCAAGAACGAAAGTTAGGGGATCGAAGATGATCAGATA | 966  |
| Query | 962  | CCGTCGTAGTCTTAACCATAAACTATGCCGACTAGGGATCGGGTGTGTTCTtttttttGA  | 1021 |
|       |      |                                                               |      |
| Sbjct | 967  | CCGTCGTAGTCTTAACCATAAACTATGCCGACTAGGGATCGGGTGTGTTCTTTTTTTTGA  | 1026 |
| Query | 1022 | CGCACTCGGCACCTTACGAGAAATCAAAGTCTTTGGGTTCTGGGGGAGTATGGTCGCAA   | 1081 |
|       |      |                                                               |      |
| Sbjct | 1027 | CGCACTCGGCACCTTACGAGAAATCAAAGTCTTTGGGTTCTGGGGGAGTATGGTCGCAA   | 1086 |
| Query | 1082 | GGCTGAAACTTAAAGGAATTGACGGAAGGGCACCACCAGGAGTGGAGCCTGCGGCTTAAT  | 1141 |
|       |      |                                                               |      |
| Sbjct | 1087 | GGCTGAAACTTAAAGGAATTGACGGAAGGGCACCACCAGGAGTGGAGCCTGTTGCTTAAT  | 1146 |
| Query | 1142 | TTGACTCAACACGGGGAAACTCACCAGGTCCAGACACAATAAGGATTGACAGATTGAGAG  | 1201 |
|       |      |                                                               |      |
| Sbjct | 1147 | TTGACTCAACACGGGGAAACTCACCAGGTCCAGACACAATAAGGATTGACAGATTGAGAG  | 1206 |
| Query | 1202 | CTCTTTCTTGATTTTGTGGGTGGTGGTGCATGGCCGTTCTTAGTTGGTGGAGTGATTTGT  | 1261 |
|       |      |                                                               |      |
| Sbjct | 1207 | CTCTTTCTTGATTTTGTGGGTGGTGGTGCATGGCCGTTCTTAGTTGGTGGAGTGATTTGT  | 1266 |
| Query | 1262 | CTGCTTAATTGCGATAACGAACGAGACCTTAACCTACTAAATAGTGCTGCTAGCTTTTGC  | 1321 |
|       |      |                                                               |      |
| Sbjct | 1267 | CTGCTTAATTGCGATAACGAACGAGACCTTAACCTACTAAATAGTGCTGCTAGCTTTTGC  | 1326 |
| Query | 1322 | TGGTATAGTCACTTCTTAGAGGGACTATCGATTTCAAGTCGATGGAAGTTTGAGGCAATA  | 1381 |
|       |      |                                                               |      |
| Sbjct | 1327 | TGGTATAGTCACTTCTTAGAGGGACTATCGATTTCAAGTCGATGGAAGTTTGAGGCAATA  | 1386 |
| Query | 1382 | ACAGGTCTGTGATGCCCTTAGACGTTCTGGGCCGCACGCGCGCTACACTGACGGAGCCAA  | 1441 |
|       |      |                                                               |      |
| Sbjct | 1387 | ACAGGTCTGTGATGCCCTTAGACGTTCTGGGCCGCACGCGCGCTACACTGACGGAGCCAG  | 1446 |
| Query | 1442 | CGAGTAT-TAACCTTGGCCGAGAGGTCTGGGAAATCTTGTGAAACTCCGTCGTGCTGGGG  | 1500 |
|       |      |                                                               |      |
| Sbjct | 1447 | CGAGT-TCTAACCTTGGCCGAGAGGTCTGGGTAATCTTGTGAAACTCCGTCGTGCTGGGG  | 1505 |
| Query | 1501 | ATAGAGCATTGTAATTATTGCTCTTCAACGAGGAATTCCTAGTAAGCGCAAGTCATCAGC  | 1560 |
|       |      |                                                               |      |
| Sbjct | 1506 | ATAGAGCATTGTAATTATTGCTCTTCAACGAGGAATTCCTAGTAAGCGCAAGTCATCAGC  | 1565 |
| Query | 1561 | TTGCGTTGATTACGTCCCTGCCCTTTGTACACACCGCCCGTCGCTACTACCGATTGAATG  | 1620 |
|       |      |                                                               |      |
| Sbjct | 1566 | TTGCGTTGATTACGTCCCTGCCCTTTGTACACACCGCCCGTCGCTACTACCGATTGAATG  | 1625 |
| Query | 1621 | GCTTAGTGAGGCCTCCGGATTGGTTTAAAGAAGGGGGCAACTCCATCTTGAACCGAAAA   | 1680 |
|       |      |                                                               |      |
| Sbjct | 1626 | GCTTAGTGAGGCCTCCGGATTGGTTTAAAGAAGGGGGCAACTCCATCTTGAACCGAAAA   | 1685 |
| Query | 1681 | GCTGGTCAAACCTTGGTCATTTAGAGGAAGTAAAAGTCGTAACAAGGTTTCCGTAGGTGAA | 1740 |
|       |      |                                                               |      |
| Sbjct | 1686 | GCTAGTCAAACCTTGGTCATTTAGAGGAAGTAAAAGTCGTAACAAGGTTTCCGTAGGTGAA | 1745 |
| Query | 1741 | CCT 1743                                                      |      |
|       |      |                                                               |      |
| Sbjct | 1746 | CCT 1748                                                      |      |

>dbj|AB054274.1| Debaryomyces vanriijiae gene for 18S rRNA, partial sequence,  
strain:JCM  
3657  
Length=1752

Score = 3127 bits (1693), Expect = 0.0  
Identities = 1721/1734 (99%), Gaps = 3/1734 (0%)  
Strand=Plus/Plus

|       |     |                                                               |     |
|-------|-----|---------------------------------------------------------------|-----|
| Query | 3   | GCCATGCATGTCTAAGTATAAGCAATTTATACAGTGAAACTGCGAATGGCTCATTAAATC  | 62  |
|       |     |                                                               |     |
| Sbjct | 21  | GCCATGCATGTCTAAGTATAAGCAATTTATACAGTGAAACTGCGAATGGCTCATTAAATC  | 80  |
| Query | 63  | AGTTATCGTTTATTTGATAGTACCTTTACTACTTGGATAACCGTGGTAATTCTAGAGCTA  | 122 |
|       |     |                                                               |     |
| Sbjct | 81  | AGTTATCGTTTATTTGATAGTACCTTTACTACTTGGATAACCGTGGTAATTCTAGAGCTA  | 140 |
| Query | 123 | ATACATGCTAAAAATCCCGACTGTTTGAAGGGATGTATTTATTAGATAAAAAATCAATG   | 182 |
|       |     |                                                               |     |
| Sbjct | 141 | ATACATGCTAAAAATCCCGACTGTTTGAAGGGATGTATTTATTAGATAAAAAATCAATG   | 200 |
| Query | 183 | CTTTTCGGAGCTCTTTGATGATTATAAATACTTTTCGAATCGCATGGCCTTGTGCTGGC   | 242 |
|       |     |                                                               |     |
| Sbjct | 201 | CTTTTCGGAGCTCTTTGATGATTATAAATACTTTTCGAATCGCATGGCCTTGTGCTGGC   | 260 |
| Query | 243 | GATGGTTCATTCAAATTTCTGCCCTATCAACTTTCGATGGTAGGATAGTGGCCTACCATG  | 302 |
|       |     |                                                               |     |
| Sbjct | 261 | GATGGTTCATTCAAATTTCTGCCCTATCAACTTTCGATGGTAGGATAGTGGCCTACCATG  | 320 |
| Query | 303 | GTTTCAACGGGTAACGGGGAATAAGGGTTCGATTCCGGAGAGGGAGCCTGAGAAACGGCT  | 362 |
|       |     |                                                               |     |
| Sbjct | 321 | GTTTCAACGGGTAACGGGGAATAAGGGTTCGATTCCGGAGAGGGAGCCTGAGAAACGGCT  | 380 |
| Query | 363 | ACCACATCCAAGGAAGGCAGCAGGCGCGCAAATTACCCAATCCCGACACGGGGAGGTAGT  | 422 |
|       |     |                                                               |     |
| Sbjct | 381 | ACCACATCCAAGGAAGGCAGCAGGCGCGCAAATTACCCAATCCCGACACGGGGAGGTAGT  | 440 |
| Query | 423 | GACAATAAATAACGATACAGGGCCCTTTCGGGTCTTGTAAATTGGAATGAGTACAATGTAA | 482 |
|       |     |                                                               |     |
| Sbjct | 441 | GACAATAAATAACGATACAGGGCCCTTTCGGGTCTTGTAAATTGGAATGAGTACAATGTAA | 500 |
| Query | 483 | ATACCTTAACGAGGAACAATTGGAGGGCAAGTCTGGTGCCAGCAGCCGCGTAATTCCAG   | 542 |
|       |     |                                                               |     |
| Sbjct | 501 | ATACCTTAACGAGGAACAATTGGAGGGCAAGTCTGGTGCCAGCAGCCGCGTAATTCCAG   | 560 |
| Query | 543 | CTCCAATAGCGTATATTAAGTTGTTGCAGTTAAAAAGCTCGTAGTTGAACCTTGGGCTT   | 602 |
|       |     |                                                               |     |
| Sbjct | 561 | CTCCAATAGCGTATATTAAGTTGTTGCAGTTAAAAAGCTCGTAGTTGAACCTTGGGCTT   | 620 |
| Query | 603 | GGTTGGCCGGTCCGCCTTTTTGGCGAGTACTGGACCAACCGAGCCTTTCCTTCTGGCTA   | 662 |
|       |     |                                                               |     |
| Sbjct | 621 | GGTTGGCCGGTCCGCCTTTTTGGCGAGTACTGGACCAACCGAGCCTTTCCTTCTGGCTA   | 680 |
| Query | 663 | ACCTTTCGCCCTTGTGGTGTGGCGAACCAGGACTTTTACTTTGAAAAAATTAGAGTGT    | 722 |
|       |     |                                                               |     |
| Sbjct | 681 | ACCTCTCGTCCTTGTGGTGTGGCGAACCAGGACTTTTACTTTGAAAAAATTAGAGTGT    | 740 |
| Query | 723 | TCAAAGCAGGCCTTTGCTCGAATATATTAGCATGGAATAATAGAATAGGACGTTATGGTT  | 782 |
|       |     |                                                               |     |
| Sbjct | 741 | TCAAAGCAGGCCTTTGCTCGAATATATTAGCATGGAATAATAGAATAGGACGTTATGGTT  | 800 |
| Query | 783 | CTATTTTGTGGTTTCTAGGACCATCGTAATGATTAATAGGGACGGTCGGGGGCATCAGT   | 842 |
|       |     |                                                               |     |

|       |      |                                                               |      |
|-------|------|---------------------------------------------------------------|------|
| Sbjct | 801  | CTATTTTGTGGTTTCTAGGACCATCGTAATGATTAATAGGGACGGTCGGGGGCATCAGT   | 860  |
| Query | 843  | ATTCAGTTGTCAGAGGTGAAATTCTTGGATT-ACCTGAAGACTAACTACTGCGAAAGCAT  | 901  |
| Sbjct | 861  | ATTCAGTTGTCAGAGGTGAAATTCTTGGATTAC-TGAAGACTAACTACTGCGAAAGCAT   | 919  |
| Query | 902  | TTGCCAAGGACGTTTTTCATTAATCAAGAACGAAAGTTAGGGGATCGAAGATGATCAGATA | 961  |
| Sbjct | 920  | TTGCCAAGGACGTTTTTCATTAATCAAGAACGAAAGTTAGGGGATCGAAGATGATCAGATA | 979  |
| Query | 962  | CCGTCGTAGTCTTAACCATAAACTATGCCGACTAGGGATCGGGTGTGTTCTttttttGA   | 1021 |
| Sbjct | 980  | CCGTCGTAGTCTTAACCATAAACTATGCCGACTAGGGATCGGGTGTGTTCTTTTTTTGA   | 1039 |
| Query | 1022 | CGCACTCGGCACCTTACGAGAAATCAAAGTCTTTGGGTTCTGGGGGAGTATGGTCGCAA   | 1081 |
| Sbjct | 1040 | CGCACTCGGCACCTTACGAGAAATCAAAGTCTTTGGGTTCTGGGGGAGTATGGTCGCAA   | 1099 |
| Query | 1082 | GGCTGAAACTTAAAGGAATTGACGGAAGGGCACCACCAGGAGTGGAGCCTGCGGCTTAAT  | 1141 |
| Sbjct | 1100 | GGCTGAAACTTAAAGGAATTGACGGAAGGGCACCACCAGGAGTGG-GACTGCGGCTTAAT  | 1158 |
| Query | 1142 | TTGACTCAACACGGGGAAACTCACCAGGTCCAGACACAATAAGGATTGACAGATTGAGAG  | 1201 |
| Sbjct | 1159 | TTGACTCAACACGGGGAAACTCACCAGGTCCAGACACAATAAGGATTGACAGATTGAGAG  | 1218 |
| Query | 1202 | CTCTTTCTTGATTTTGTGGGTGGTGGTGCATGGCCGTTCTTAGTTGGTGGAGTGATTTGT  | 1261 |
| Sbjct | 1219 | CTCTTTCTTGATTTTGTGGGTGGTGGTGCATGGCCGTTCTTAGTTGGTGGAGTGATTTGT  | 1278 |
| Query | 1262 | CTGCTTAATTGCGATAACGAACGAGACCTTAACCTACTAAATAGTGCTGCTAGCTTTTGC  | 1321 |
| Sbjct | 1279 | CTGCTTAATTGCGATAACGAACGAGACCTTAACCTACTAAATAGTGCTGCTAGCTTAGGC  | 1338 |
| Query | 1322 | TGGTATAGTCACTTCTTAGAGGGACTATCGATTTCAAGTCGATGGAAGTTTGAGGCAATA  | 1381 |
| Sbjct | 1339 | TGGTATAGTCACTTCTTAGAGGGACTATCGATTTCAAGTCGATGGAAGTTTGAGGCAATA  | 1398 |
| Query | 1382 | ACAGGTCTGTGATGCCCTTAGACGTTCTGGGCCGCACGCGCTACACTGACGGAGCCAA    | 1441 |
| Sbjct | 1399 | ACAGGTCTGTGATGCCCTTAGACGTTCTGGGCCGCACGCGCTACACTGACGGAGCCAG    | 1458 |
| Query | 1442 | CGAGTATTAACCTTGGCCGAGAGGTCTGGGAAATCTTGTGAAACTCCGTCGTGCTGGGGA  | 1501 |
| Sbjct | 1459 | CGAGTATTAACCTTGGCCGAGAGGTCTGGGAAATCTTGTGAAACTCCGTCGTGCTGGGGA  | 1518 |
| Query | 1502 | TAGAGCATTGTAATTATTGCTCTTCAACGAGGAATTCCTAGTAAGCGCAAGTCATCAGCT  | 1561 |
| Sbjct | 1519 | TAGAGCATTGTAATTATTGCTCTTCAACGAGGAATTCCTAGTAAGCGCAAGTCATCAGCT  | 1578 |
| Query | 1562 | TGCGTTGATTACGTCCCTGCCCTTTGTACACACCGCCCCTCGCTACTACCGATTGAATGG  | 1621 |
| Sbjct | 1579 | TGCGTTGATTACGTCCCTGCCCTTTGTACACACCGCCCCTCGCTACTACCGATTGAATGG  | 1638 |
| Query | 1622 | CTTAGTGAGGCCTCCGGATTGGTTTAAAGAAGGGGGCAACTCCATCTTGAACCGAAAAG   | 1681 |
| Sbjct | 1639 | CTTAGTGAGGCCTCCGGATTGGTTTAAAGAAGGGGGCAACTCCATCTTGAACCGAAAAG   | 1698 |
| Query | 1682 | CTGGTCAAACCTGGTCAATTTAGAGGAAGTAAAAGTCGTAACAAGGTTTCCGTAG       | 1735 |
| Sbjct | 1699 | CTAGTCAAACCTGGTCAATTTAGAGGAAGTAAAAGTCGTAACAAGGTTTCCGTAG       | 1752 |

>dbj|AB105434.1| Pichia guilliermondii gene for 18S rRNA, partial sequence,  
strain:IAM  
14500  
Length=1734

Score = 3127 bits (1693), Expect = 0.0  
Identities = 1717/1728 (99%), Gaps = 5/1728 (0%)  
Strand=Plus/Plus

```
Query 3      GCCATGCATGTCTAAGTATAAGCAATTTATACAGTGAAACTGCGAATGGCTCATTAAATC 62
      |||
Sbjct 10     GCCATGCATGTCTAAGTATAAGCAATTTATACAGTGAAACTGCGAATGGCTCATTAAATC 69

Query 63     AGTTATCGTTTATTTGATAGTACCTTTACTACTTGGATAACCGTGGTAATTCTAGAGCTA 122
      |||
Sbjct 70     AGTTATCGTTTATTTGATAGTACCTTTACTACTTGGATAACCGTGGTAATTCTAGAGCTA 129

Query 123    ATACATGCTAAAAATCCCGACTGTTTGAAGGGATGTATTTATTAGATAAAAAATCAATG 182
      |||
Sbjct 130    ATACATGCTAAAAATCCCGACTGTTTGAAGGGATGTATTTATTAGATAAAAAATCAATG 189

Query 183    CT-TTTCGGAGCTCTTTGATGATTCAATAAATTTTCGAATCGCATGGCCTTGTGCTGG 241
      |||
Sbjct 190    CTCTTT--GAGCTCTTTGATGATTCAATAAATTTTCGAATCGCATGGCCTTGTGCTGG 247

Query 242    CGATGGTTCATTCAAATTTCTGCCCTATCAACTTTCGATGGTAGGATAGTGGCCTACCAT 301
      |||
Sbjct 248    CGATGGTTCATTCAAATTTCTGCCCTATCAACTTTCGATGGTAGGATAGTGGCCTACCAT 307

Query 302    GGTTCACCGGGTAACGGGGAATAAGGGTTCGATCCGGAGAGGGAGCCTGAGAAACGGC 361
      |||
Sbjct 308    GGTTCACCGGGTAACGGGGAATAAGGGTTCGATCCGGAGAGGGAGCCTGAGAAACGGC 367

Query 362    TACCACATCCAAGGAAGGCAGCAGGCGCGCAAATTACCCAATCCCGACACGGGGAGGTAG 421
      |||
Sbjct 368    TACCACATCCAAGGAAGGCAGCAGGCGCGCAAATTACCCAATCCCGACACGGGGAGGTAG 427

Query 422    TGACAATAAATAACGATACAGGGCCCTTTCGGGTCTTGTAATTGGAATGAGTACAATGTA 481
      |||
Sbjct 428    TGACAATAAATAACGATACAGGGCCCTTTCGGGTCTTGTAATTGGAATGAGTACAATGTA 487

Query 482    AATACCTTAACGAGGAACAATTGGAGGGCAAGTCTGGTGCCAGCAGCCGCGTAATTCCA 541
      |||
Sbjct 488    AATACCTTAACGAGGAACAATTGGAGGGCAAGTCTGGTGCCAGCAGCCGCGTAATTCCA 547

Query 542    GCTCCAATAGCGTATATTAAGTTGTTGCAGTTAAAAAGCTCGTAGTTGAACCTTGGGCT 601
      |||
Sbjct 548    GCTCCAATAGCGTATATTAAGTTGTTGCAGTTAAAAAGCTCGTAGTTGAACCTTGGGCT 607

Query 602    TGGTTGGCCGGTCCGCCTTTTTGGCGAGTACTGGACCCAACCGAGCCTTTCCTTCTGGCT 661
      |||
Sbjct 608    TGGTTGGCCGGTCCGCCTTTTTGGCGAGTACTGGACCCAACCGAGCCTTTCCTTCTGGCT 667

Query 662    AACCTTTCGCCCTTGTGGTGTGGCGAACCAGGACTTTTACTTTGAAAAAATTAGAGTG 721
      |||
Sbjct 668    AACCATTCGCCCTTGTGGTGTGGCGAACCAGGACTTTTACTTTGAAAAAATTAGAGTG 727

Query 722    TTCAAAGCAGGCCTTTGCTCGAATATATTAGCATGGAATAATAGAATAGGACGTTATGGT 781
      |||
Sbjct 728    TTCAAAGCAGGCCTTTGCTCGAATATATTAGCATGGAATAATAGAATAGGACGTTATGGT 787

Query 782    TCTATTTTGTGGTTTCTAGGACCATCGTAATGATTAATAGGGACGGTCGGGGGCATCAG 841
      |||
Sbjct 788    TCTATTTTGTGGTTTCTAGGACCATCGTAATGATTAATAGGGACGGTCGGGGGCATCAG 847
```







|       |      |                                                               |      |
|-------|------|---------------------------------------------------------------|------|
| Sbjct | 848  | ATTCAGTTGTCAGAGGTGAAATTCTTGGATTTA-CTGAAGACTAACTACTGCGAAAGCAT  | 906  |
| Query | 902  | TTGCCAAGGACGTTTTTCATTAATCAAGAACGAAAGTTAGGGGATCGAAGATGATCAGATA | 961  |
| Sbjct | 907  | TTGCCAAGGACGTTTTTCATTAATCAAGAACGAAAGTTAGGGGATCGAAGATGATCAGATA | 966  |
| Query | 962  | CCGTCGTAGTCTTAACCATAAACTATGCCGACTAGGGATCGGGTGTGTTCTtttttttGA  | 1021 |
| Sbjct | 967  | CCGTCGTAGTCTTAACCATAAACTATGCCGACTAGGGATCGGGTGTGTTCTTTTTTTGA   | 1026 |
| Query | 1022 | CGCACTCGGCACCTTACGAGAAATCAAAGTCTTTGGGTTCTGGGGGAGTATGGTCGCAA   | 1081 |
| Sbjct | 1027 | CGCACTCGGCACCTTACGAGAAATCAAAGTCTTTGGGTTCTGGGGGAGTATGGTCGCAA   | 1086 |
| Query | 1082 | GGCTGAAACTTAAAGGAATTGACGGAAGGGCACCACCAGGAGTGGAGCCTGCGGCTTAAT  | 1141 |
| Sbjct | 1087 | GGCTGAAACTTAAAGGAATTGACGGAAGGGCACCACCAGGAGTGGAGCCTGCGGCTTAAT  | 1146 |
| Query | 1142 | TTGACTCAACACGGGGAAACTCACCAGGTCCAGACACAATAAGGATTGACAGATTGAGAG  | 1201 |
| Sbjct | 1147 | TTGACTCAACACGGGGAAACTCACCAGGTCCAGACACAATAAGGATTGACAGATTGAGAG  | 1206 |
| Query | 1202 | CTCTTTCTTGATTTTGTGGGTGGTGGTGCATGGCCGTTCTTAGTTGGTGGAGTGATTTGT  | 1261 |
| Sbjct | 1207 | CTCTTTCTTGATTTTGTGGGTGGTGGTGCATGGCCGTTCTTAGTTGGTGGAGTGATTTGT  | 1266 |
| Query | 1262 | CTGCTTAATTGCGATAACGAACGAGACCTTAACCTACTAAATAGTGCTGCTAGCTTTTGC  | 1321 |
| Sbjct | 1267 | CTGCTTAATTGCGATAACGAACGAGACCTTAACCTACTAAATAGTGCTGCTAGCTTTTGC  | 1326 |
| Query | 1322 | TGGTATAGTCACTTCTTAGAGGGACTATCGATTTCAAGTCGATGGAAGTTTGAGGCAATA  | 1381 |
| Sbjct | 1327 | TGGTATAGTCACTTCTTAGAGGGACTATCGATTTCAAGTCGATGGAAGTTTGAGGCAATA  | 1386 |
| Query | 1382 | ACAGGTCTGTGATGCCCTTAGACGTTCTGGGCCGCACGCGCGCTACACTGACGGAGCCAA  | 1441 |
| Sbjct | 1387 | ACAGGTCTGTGATGCCCTTAGACGTTCTGGGCCGCACGCGCGCTACACTGACGGAGCCAG  | 1446 |
| Query | 1442 | CGAGTAT-TAACCTTGGCCGAGAGGTCTGGGAAATCTTGTGAAACTCCGTCGTGCTGGGG  | 1500 |
| Sbjct | 1447 | CGAGT-TCTAACCTTGGCCGAGAGGTCTGGGTAATCTTGTGAAACTCCGTCGTGCTGGGG  | 1505 |
| Query | 1501 | ATAGAGCATTGTAATTATTGCTCTTCAACGAGGAATTCCTAGTAAGCGCAAGTCATCAGC  | 1560 |
| Sbjct | 1506 | ATAGAGCATTGTAATTATTGCTCTTCAACGAGGAATTCCTAGTAAGCGCAAGTCATCAGC  | 1565 |
| Query | 1561 | TTGCGTTGATTACGTCCCTGCCCTTTGTACACACCGCCCGTCGCTACTACCGATTGAATG  | 1620 |
| Sbjct | 1566 | TTGCGTTGATTACGTCCCTGCCCTTTGTACACACCGCCCGTCGCTACTACCGATTGAATG  | 1625 |
| Query | 1621 | GCTTAGTGAGGCCTCCGGATTGGTTTAAAGAAGGGGGCAACTCCATCTTGAACCGAAAA   | 1680 |
| Sbjct | 1626 | GCTTAGTGAGGCCTCCGGATTGGTTTAAAGAAGGGGGCAACTCCATCTTGAACCGAAAA   | 1685 |
| Query | 1681 | GCTGGTCAAACCTGGTCAATTTAGAGGAAGTAAAAGTCGTAACAAGGTTTCCGTA       | 1734 |
| Sbjct | 1686 | GCTAGTCAAACCTGGTCAATTTAGAGGAAGTAAAAGTCGTAACAAGGTTTCCGTA       | 1739 |

>dbj|AB013542.1| *Candida sophiae-reginae* 18S rRNA gene, strain JCM 8925, partial sequence  
Length=1781

Score = 3123 bits (1691), Expect = 0.0



|       |      |                                                                   |      |
|-------|------|-------------------------------------------------------------------|------|
| Sbjct | 924  | <br>ATTTGCCAAGGACGTTTTTCATTAATCAAGAACGAAAGTTAGGGGATCGAAGATGATCAGA | 983  |
| Query | 960  | TACCGTCGTAGTCTTAACCATAAACTATGCCGACTAGGGATCGGGTGTGTTCTttttttt      | 1019 |
| Sbjct | 984  | <br>TACCGTCGTAGTCTTAACCATAAACTATGCCGACTAGGGATCGGGTGTGTTCTTTTTTT   | 1043 |
| Query | 1020 | GACGCACTCGGCACCTTACGAGAAATCAAAGTCTTTGGGTTCTGGGGGAGTATGGTCCG       | 1079 |
| Sbjct | 1044 | <br>GACGCACTCGGCACCTTACGAGAAATCAAAGTCTTTGGGTTCTGGGGGAGTATGGTCCG   | 1103 |
| Query | 1080 | AAGGCTGAAACTTAAAGGAATTGACGGAAGGGCACCACCAGGAGTGGAGCCTGCGGCTTA      | 1139 |
| Sbjct | 1104 | <br>AAGGCTGAAACTTAAAGGAATTGACGGAAGGGCACCACCAGGAGTGGAGCCTGCGGCTTA  | 1163 |
| Query | 1140 | ATTTGACTCAACACGGGGAAACTCACCAGGTCCAGACACAATAAGGATTGACAGATTGAG      | 1199 |
| Sbjct | 1164 | <br>ATTTGACTCAACACGGGGAAACTCACCAGGTCCAGACACAATAAGGATTGACAGATTGAG  | 1223 |
| Query | 1200 | AGCTCTTTCTTGATTTTGTGGGTGGTGGTGCATGGCCGTTCTTAGTTGGTGGAGTGATTT      | 1259 |
| Sbjct | 1224 | <br>AGCTCTTTCTTGATTTTGTGGGTGGTGGTGCATGGCCGTTCTTAGTTGGTGGAGTGATTT  | 1283 |
| Query | 1260 | GTCTGCTTAATTGCGATAACGAACGAGACCTTAACCTACTAAATAGTGCTGCTAGCTTTT      | 1319 |
| Sbjct | 1284 | <br>GTCTGCTTAATTGCGATAACGAACGAGACCTTAACCTACTAAATAGTGCTGCTAGCTTTT  | 1343 |
| Query | 1320 | GCTGGTATAGTCACTTCTTAGAGGGACTATCGATTTCAAGTCGATGGAAGTTTGAGGCAA      | 1379 |
| Sbjct | 1344 | <br>GCTGGTATAGTCACTTCTTAGAGGGACTATCGATTTCAAGTCGATGGAAGTTTGAGGCAA  | 1403 |
| Query | 1380 | TAACAGGTCTGTGATGCCCTTAGACGTTCTGGGCCGCACGCGCGCTACACTGACGGAGCC      | 1439 |
| Sbjct | 1404 | <br>TAACAGGTCTGTGATGCCCTTAGACGTTCTGGGCCGCACGCGCGCTACACTGACGGAGCC  | 1463 |
| Query | 1440 | AACGAGTAT-TAACCTTGGCCGAGAGGTCTGGGAAATCTTGTGAAACTCCGTCGTGCTGG      | 1498 |
| Sbjct | 1464 | <br>AGCGAGT-TCTAACCTTGGCCGAGAGGTCTGGGTAATCTTGTGAAACTCCGTCGTGCTGG  | 1522 |
| Query | 1499 | GGATAGAGCATTGTAATTATTGCTCTTCAACGAGGAATTCCTAGTAAGCGCAAGTCATCA      | 1558 |
| Sbjct | 1523 | <br>GGATAGAGCATTGTAATTATTGCTCTTCAACGAGGAATTCCTAGTAAGCGCAAGTCATCA  | 1582 |
| Query | 1559 | GCTTGCGTTGATTACGTCCCTGCCCTTTGTACACACCGCCCGTCGCTACTACCGATTGAA      | 1618 |
| Sbjct | 1583 | <br>GCTTGCGTTGATTACGTCCCTGCCCTTTGTACACACCGCCCGTCGCTACTACCGATTGAA  | 1642 |
| Query | 1619 | TGGCTTAGTGAGGCCTCCGGATTGGTTTAAAGAAGGGGGCAACTCCATCTTGAACCGAA       | 1678 |
| Sbjct | 1643 | <br>TGGCTTAGTGAGGCCTCCGGATTGGTTTAAAGAAGGGGGCAACTCCATCTTGAACCGAA   | 1702 |
| Query | 1679 | AAGCTGGTCAAACCTGGTCAATTTAGAGGAAGTAAAAGTCGTAACAAGGTTTCCGTAGGTG     | 1738 |
| Sbjct | 1703 | <br>AAGCTAGTCAAACCTGGTCAATTTAGAGGAAGTAAAAGTCGTAACAAGGTTTCCGTAG-TG | 1761 |
| Query | 1739 | AACCTGCGGAAGGATCATT                                               | 1758 |
| Sbjct | 1762 | <br>AACCTGCGGAAGGATCATT                                           | 1781 |

>dbj|AB013535.1| Candida multigemmis 18S rRNA gene, strain JCM 9559, partial  
sequence  
Length=1783









```

Query 902 TTGCCAAGGACGTTTTTCATTAATCAAGAACGAAAGTTAGGGGATCGAAGATGATCAGATA 961
          |||
Sbjct 928 TTGCCAAGGACGTTTTTCATTAATCAAGAACGAAAGTTAGGGGATCGAAGATGATCAGATA 987

Query 962 CCGTCGTAGTCTTAACCATAAACTATGCCGACTAGGGATCGGGTGTGTTCTttttttGA 1021
          |||
Sbjct 988 CCGTCGTAGTCTTAACCATAAACTATGCCGACTAGGGATCGGGTGTGTTCTTTTTTTGA 1047

Query 1022 CGCACTCGGCACCTTACGAGAAATCAAAGTCTTTGGGTTCTGGGGGGAGTATGGTCGCAA 1081
          |||
Sbjct 1048 CGCACTCGGCACCTTACGAGAAATCAAAGTCTTTGGGTTCTGGGGGGAGTATGGTCGCAA 1107

Query 1082 GGCTGAAACTTAAAGGAATTGACGGAAGGGCACCACCAGGAGTGGAGCCTGCGGCTTAAT 1141
          |||
Sbjct 1108 GGCTGAAACTTAAAGGAATTGACGGAAGGGCACCACCAGGAGTGGAGCCTGCGGCTTAAT 1167

Query 1142 TTGACTCAACACGGGGAAACTCACCAGTCCAGACACAATAAGGATTGACAGATTGAGAG 1201
          |||
Sbjct 1168 TTGACTCAACACGGGGAAACTCACCAGTCCAGACACAATAAGGATTGACAGATTGAGAG 1227

Query 1202 CTCTTTCTTGATTTTGTGGGTGGTGGTGCATGGCCGTTCTTAGTTGGTGGAGTGATTTGT 1261
          |||
Sbjct 1228 CTCTTTCTTGATTTTGTGGGTGGTGGTGCATGGCCGTTCTTAGTTGGTGGAGTGATTTGT 1287

Query 1262 CTGCTTAATTGCGATAACGAACGAGACCTTAACCTACTAAATAGTGCTGCTAGCTTTTGC 1321
          |||
Sbjct 1288 CTGCTTAATTGCGATAACGAACGAGACCTTAACCTACTAAATAGTGCTGCTAGCTTTTGC 1347

Query 1322 TGGTATAGTCACTTCTTAGAGGGACTATCGATTTCAAGTCGATGGAAGTTTGAGGCAATA 1381
          |||
Sbjct 1348 TGGTATAGTCACTTCTTAGAGGGACTATCGATTTCAAGTCGATGGAAGTTTGAGGCAATA 1407

Query 1382 ACAGGTCTGTGATGCCCTTAGACGTTCTGGGCCGCACGCGCGCTACACTGACGGAGCCAA 1441
          |||
Sbjct 1408 ACAGGTCTGTGATGCCCTTAGACGTTCTGGGCCGCACGCGCGCTACACTGACGGAGCCAA 1467

Query 1442 CGAGTAT-TAACCTTGGCCGAGAGGTCTGGGAAATCTTGTGAAACTCCGTCGTGCTGGGG 1500
          |||
Sbjct 1468 CGAGTTTGTA-CCTTGGCCGAGAGGTCTGGGAAATCTTGTGAAACTCCGTCGTGCTGGGG 1526

Query 1501 ATAGAGCATTGTAATTATTGCTCTTCAACGAGGAATTCCTAGTAAGCGCAAGTCATCAGC 1560
          |||
Sbjct 1527 ATAGAGCATTGTAATTATTGCTCTTCAACGAGGAATTCCTAGTAAGCGCAAGTCATCAGC 1586

Query 1561 TTGCGTTGATTACGTCCCTGCCCTTTGTACACACCGCCCGTCGCTACTACCGATTGAATG 1620
          |||
Sbjct 1587 TTGCGTTGATTACGTCCCTGCCCTTTGTACACACCGCCCGTCGCTACTACCGATTGAATG 1646

Query 1621 GCTTAGTGAGGCCTCCGGATTGGTTTAAAGAAGGGGGCAACTCCATCTTGAAACCGAAAA 1680
          |||
Sbjct 1647 GCTTAGTGAGGCCTCCGGATTGGTTTAAAGAAGGGGGCAACTCCATCTTGAAACCGAAAA 1706

Query 1681 GCTGGTCAAACCTGGTCATTTAGAGGAAGTAAAAGTCGTAACAAGGTTTCCGTAGGTGAA 1740
          |
Sbjct 1707 GTTGGTCAAACCTGGTCATTTAGAGGAAGTAAAAGTCGTAACAAGGTTTCCGTAG-TGAA 1765

Query 1741 CCTGCGGAAGGATCATTA 1758
          |||
Sbjct 1766 CCTGCGGAAGGATCATTA 1783

```

>dbj|AB054267.1| *Debaryomyces vanrijiae* var. *yarrowii* gene for 18S rRNA, partial sequence, strain:JCM 6190

Length=1753

Score = 3118 bits (1688), Expect = 0.0  
Identities = 1719/1735 (99%), Gaps = 4/1735 (0%)  
Strand=Plus/Plus

|       |     |                                                                |     |
|-------|-----|----------------------------------------------------------------|-----|
| Query | 3   | GCCATGCATGTCTAAGTATAAGCAATTTATACAGTGAAACTGCGAATGGCTCATTAAATC   | 62  |
|       |     |                                                                |     |
| Sbjct | 21  | GCCATGCATGTCTAAGTATAAGCAATTTATACAGTGAAACTGCGAATGGCTCATTAAATC   | 80  |
| Query | 63  | AGTTATCGTTTATTTGATAGTACCTTTACTACTTGGATAACCGTGGTAATTCTAGAGCTA   | 122 |
|       |     |                                                                |     |
| Sbjct | 81  | AGTTATCGTTTATTTGATAGTACCTTTACTACTTGGATAACCGTGGTAATTCTAGAGCTA   | 140 |
| Query | 123 | ATACATGCTAAAAATCCCGACTGTTTGAAGGGATGTATTTATTAGATAAAAAATCAATG    | 182 |
|       |     |                                                                |     |
| Sbjct | 141 | ATACATGCTAAAAATCCCGACTGTTTGAAGGGATGTATTTATTAGATAAAAAATCAATG    | 200 |
| Query | 183 | CTTTTCGGAGCTCTTTGATGATTCAATAACTTTTCGAATCGCATGGCCTTGTGCTGGC     | 242 |
|       |     |                                                                |     |
| Sbjct | 201 | CTTTTCGGAGCTCTTTGATGATTCAATAACTTTTCGAATCGCATGGCCTTGTGCTGGC     | 260 |
| Query | 243 | GATGGTTCATTCAAATTTCTGCCCTATCAACTTTTCGATGGTAGGATAGTGGCCTACCATG  | 302 |
|       |     |                                                                |     |
| Sbjct | 261 | GATGGTTCATTCAAATTTCTGCCCTATCAACTTTTCGATGGTAGGATAGTGGCCTACCATG  | 320 |
| Query | 303 | GTTTCAACGGGTAACGGGGAATAAGGGTTCGATTCCGGAGAGGGAGCCTGAGAAACGGCT   | 362 |
|       |     |                                                                |     |
| Sbjct | 321 | GTTTCAACGGGTAACGGGGAATAAGGGTTCGATTCCGGAGAGGGAGCCTGAGAAACGGCT   | 380 |
| Query | 363 | ACCACATCCAAGGAAGGCAGCAGGCGCGCAAATTACCCAATCCCGACACGGGGAGGTAGT   | 422 |
|       |     |                                                                |     |
| Sbjct | 381 | ACCACATCCAAGGAAGGCAGCAGGCGCGCAAATTACCCAATCCCGACACGGGGAGGTAGT   | 440 |
| Query | 423 | GACAATAAATAACGATACAGGGCCCTTTTCGGGTCTTGTAAATTGGAATGAGTACAATGTAA | 482 |
|       |     |                                                                |     |
| Sbjct | 441 | GACAATAAATAACGATACAGGGCCCTTTTCGGGTCTTGTAAATTGGAATGAGTACAATGTAA | 500 |
| Query | 483 | ATACCTTAACGAGGAACAATTGGAGGGCAAGTCTGGTGCCAGCAGCCGCGTAATTCCAG    | 542 |
|       |     |                                                                |     |
| Sbjct | 501 | ATACCTTAACGAGGAACAATTGGAGGGCAAGTCTGGTGCCAGCAGCCGCGTAATTCCAG    | 560 |
| Query | 543 | CTCCAATAGCGTATATTAAGTTGTTGCAGTTAAAAAGCTCGTAGTTGAACCTTGGGCTT    | 602 |
|       |     |                                                                |     |
| Sbjct | 561 | CTCCAATAGCGTATATTAAGTTGTTGCAGTTAAAAAGCTCGTAGTTGAACCTTGGGCTT    | 620 |
| Query | 603 | GGTTGGCCGGTCCGCCTTTTTGGCGAGTACTGGACCCAACCGAGCCTTTCCTTCTGGCTA   | 662 |
|       |     |                                                                |     |
| Sbjct | 621 | GGTTGGCCGGTCCGCCTTTTTGGCGAGTACTGGACCCAACCGAGCCTTTCCTTCTGGCTA   | 680 |
| Query | 663 | ACCTTTCGCCCTTGTGGTGTGGCGAACCAGGACTTTTACTTTGAAAAAATTAGAGTGT     | 722 |
|       |     |                                                                |     |
| Sbjct | 681 | ACCTTTCGCCCTTGTGGTGTGGCGAACCAGGACTTTTACTTTGAAAAAATTAGAGTGT     | 740 |
| Query | 723 | TCAAAGCAGGCCTTTGCTCGAATATATTAGCATGGAATAATAGAATAGGACGTTATGGTT   | 782 |
|       |     |                                                                |     |
| Sbjct | 741 | TCAAAGCAGGCCTTTGCTCGAATATATTAGCATGGAATAATAGAATAGGACGTTATGGTT   | 800 |
| Query | 783 | CTATTTTGTGGTTTCTAGGACCATCGTAATGATTAATAGGGACGTCGGGGGCATCAGT     | 842 |
|       |     |                                                                |     |
| Sbjct | 801 | CTATTTTGTGGTTTCTAGGACCATCGTAATGATTAATAGGGACGTCGGGGGCATCAGT     | 860 |
| Query | 843 | ATTCAGTTGTCAGAGGTGAAATTCCTTGGATT-ACCTGAAGACTAACTACTGCGAAAGCAT  | 901 |
|       |     |                                                                |     |

|       |      |                                                               |      |
|-------|------|---------------------------------------------------------------|------|
| Sbjct | 861  | ATTCAGTTGTCAGAGGTGAAATTCTTGATTAC-TGAAGACTAACTACTGCGAAAGCAT    | 919  |
| Query | 902  | TT-GCCAAGGACGTTTTTCATTAATCAAGAACGAAAGTTAGGGGATCGAAGATGATCAGAT | 960  |
| Sbjct | 920  | TTTGCCAAGGACGTTTTTCATTAATCAAGAACGAAAGTTAGGGGATCGAAGATGATCAGAT | 979  |
| Query | 961  | ACCGTCGTAGTCTTAACCATAAACTATGCCGACTAGGGATCGGGTGTGTTCTtttttttG  | 1020 |
| Sbjct | 980  | ACCGTCGTAGTCTTAACCATAAACTATGCCGACTAGGGATCGGGTGTGTTCTTTTTTTG   | 1039 |
| Query | 1021 | ACGCACTCGGCACCTTACGAGAAATCAAAGTCTTTGGGTTCTGGGGGAGTATGGTCGCA   | 1080 |
| Sbjct | 1040 | ACGCACTCGGCACCTTACGAGAAATCAAAGTCTTTGGGTTCTGGGGGAGTATGGTCGCA   | 1099 |
| Query | 1081 | AGGCTGAAACTTAAAGGAATTGACGGAAGGGCACCACCAGGAGTGGAGCCTGCGGCTTAA  | 1140 |
| Sbjct | 1100 | AGGCTGAAACTTAAAGGAATTGACGGAAGGGCACCACCAGGAGTGG-GACTGCGGCTTAA  | 1158 |
| Query | 1141 | TTTGACTCAACACGGGGAAACTCACCAGGTCCAGACACAATAAGGATTGACAGATTGAGA  | 1200 |
| Sbjct | 1159 | TTTGACTCAACACGGGGAAACTCACCAGGTCCAGACACAATAAGGATTGACAGATTGAGA  | 1218 |
| Query | 1201 | GCTCTTTCTTGATTTTGTGGGTGGTGGTGCATGGCCGTTCTTAGTTGGTGGAGTGATTTG  | 1260 |
| Sbjct | 1219 | GCTCTTTCTTGATTTTGTGGGTGGTGGTGCATGGCCGTTCTTAGTTGGTGGAGTGATTTG  | 1278 |
| Query | 1261 | TCTGCTTAATTGCGATAACGAACGAGACCTTAACCTACTAAATAGTGCTGCTAGCTTTTG  | 1320 |
| Sbjct | 1279 | TCTGCTTAATTNNNATAACGAACGAGACCTTAACCTACTAAATAGTGCTGCTAGCTTAGG  | 1338 |
| Query | 1321 | CTGGTATAGTCACTTCTTAGAGGGACTATCGATTTCAAGTCGATGGAAGTTTGAGGCAAT  | 1380 |
| Sbjct | 1339 | CTGGTATAGTCACTTCTTAGAGGGACTATCGATTTCAAGTCGATGGAAGTTTGAGGCAAT  | 1398 |
| Query | 1381 | AACAGGTCTGTGATGCCCTTAGACGTTCTGGGCCGCACGCGCTACACTGACGGAGCCA    | 1440 |
| Sbjct | 1399 | AACAGGTCTGTGATGCCCTTAGACGTTCTGGGCCGCACGCGCTACACTGACGGAGCCA    | 1458 |
| Query | 1441 | ACGAGTATTAACCTTGGCCGAGAGGTCTGGGAAATCTTGTGAAACTCCGTCGTGCTGGGG  | 1500 |
| Sbjct | 1459 | GCGAGTATTAACCTTGGCCGAGAGGTCTGGGAAATCTTGTGAAACTCCGTCGTGCTGGGG  | 1518 |
| Query | 1501 | ATAGAGCATTGTAATTATTGCTCTTCAACGAGGAATTCCTAGTAAGCGCAAGTCATCAGC  | 1560 |
| Sbjct | 1519 | ATAGAGCATTGTAATTATTGCTCTTCAACGAGGAATTCCTAGTAAGCGCAAGTCATCAGC  | 1578 |
| Query | 1561 | TTGCGTTGATTACGTCCCTGCCCTTTGTACACACCGCCCGTCGCTACTACCGATTGAATG  | 1620 |
| Sbjct | 1579 | TTGCGTTGATTACGTCCCTGCCCTTTGTACACACCGCCCGTCGCTACTACCGATTGAATG  | 1638 |
| Query | 1621 | GCTTAGTGAGGCCTCCGGATTGGTTTAAAGAAGGGGGCAACTCCATCTTGAACCGAAAA   | 1680 |
| Sbjct | 1639 | GCTTAGTGAGGCCTCCGGATTGGTTTAAAGAAGGGGGCAACTCCATCTTGAACCGAAAA   | 1698 |
| Query | 1681 | GCTGGTCAAACCTGGTCAATTTAGAGGAAGTAAAAGTCGTAACAAGTTTCCGTAG       | 1735 |
| Sbjct | 1699 | GCTAGTCAAACCTGGTCAATTTAGAGGAAGTAAAAGTCGTAACAAGTTTCCGTAG       | 1753 |

>gb|AY242152.1| *Candida athensensis* strain BG99-8-11-1-C1 18S ribosomal RNA gene, partial sequence  
Length=1730

Score = 3118 bits (1688), Expect = 0.0



|       |      |                                                                   |      |
|-------|------|-------------------------------------------------------------------|------|
| Sbjct | 907  | <br>TTTGCCAAGGACGTTTTTCATTAATCAAGAACGAAAGTTAGGGGATCGAAGATGATCAGAT | 966  |
| Query | 961  | ACCGTCGTAGTCTTAACCATAAACTATGCCGACTAGGGATCGGGTGTGTTCTtttttttG      | 1020 |
| Sbjct | 967  | <br>ACCGTCGTAGTCTTAACCATAAACTATGCCGACTAGGGATCGGGTGTGTTCTTTTTTTG   | 1026 |
| Query | 1021 | ACGCACTCGGCACCTTACGAGAAATCAAAGTCTTTGGGTTCTGGGGGAGTATGGTCGCA       | 1080 |
| Sbjct | 1027 | <br>ACGCACTCGGCACCTTACGAGAAATCAAAGTCTTTGGGTTCTGGGGGAGTATGGTCGCA   | 1086 |
| Query | 1081 | AGGCTGAAACTTAAAGGAATTGACGGAAGGGCACCACCAGGAGTGGAGCCTGCGGCTTAA      | 1140 |
| Sbjct | 1087 | <br>AGGCTGAAACTTAAAGGAATTGACGGAAGGGCACCACCAGGAGTGGAGCCTGCGGCTTAA  | 1146 |
| Query | 1141 | TTTGACTCAACACGGGGAAACTCACCAGGTCCAGACACAATAAGGATTGACAGATTGAGA      | 1200 |
| Sbjct | 1147 | <br>TTTGACTCAACACGGGGAAACTCACCAGGTCCAGACACAATAAGGATTGACAGATTGAGA  | 1206 |
| Query | 1201 | GCTCTTTCTTGATTTTGTGGGTGGTGGTGCATGGCCGTTCTTAGTTGGTGGAGTGATTTG      | 1260 |
| Sbjct | 1207 | <br>GCTCTTTCTTGATTTTGTGGGTGGTGGTGCATGGCCGTTCTTAGTTGGTGGAGTGATTTG  | 1266 |
| Query | 1261 | TCTGCTTAATTGCGATAACGAACGAGACCTTAACCTACTAAATAGTGCTGCTAGCTTTTG      | 1320 |
| Sbjct | 1267 | <br>TCTGCTTAATTGCGATAACGAACGAGACCTTAACCTACTAAATAGTGCTGCTAGCTTTTG  | 1326 |
| Query | 1321 | CTGGTATAGTCACTTCTTAGAGGGACTATCGATTTCAAGTCGATGGAAGTTTGAGGCAAT      | 1380 |
| Sbjct | 1327 | <br>CTGGTATAGTCACTTCTTAGAGGGACTATCGATTTCAAGTCGATGGAAGTTTGAGGCAAT  | 1386 |
| Query | 1381 | AACAGGTCTGTGATGCCCTTAGACGTTCTGGGCCGCACGCGCTACACTGACGGAGCCA        | 1440 |
| Sbjct | 1387 | <br>AACAGGTCTGTGATGCCCTTAGACGTTCTGGGCCGCACGCGCTACACTGACGGAGCCA    | 1446 |
| Query | 1441 | ACGAGTATTAACCTTGGCCGAGAGGTCTGGGAAATCTTGTGAAACTCCGTCGTGCTGGGG      | 1500 |
| Sbjct | 1447 | <br>GCGAGTATTAACCTTGGCCGAGAGGTCTGGGAAATCTTGTGAAACTCCGTCGTGCTGGGG  | 1506 |
| Query | 1501 | ATAGAGCATTGTAATTATTGCTCTTCAACGAGGAATTCCTAGTAAGCGCAAGTCATCAGC      | 1560 |
| Sbjct | 1507 | <br>ATAGAGCATTGTAATTATTGCTCTTCAACGAGGAATTCCTAGTAAGCGCAAGTCATCAGC  | 1566 |
| Query | 1561 | TTGCGTTGATTACGTCCCTGCCCTTTGTACACACCGCCCGTCGCTACTACCGATTGAATG      | 1620 |
| Sbjct | 1567 | <br>TTGCGTTGATTACGTCCCTGCCCTTTGTACACACCGCCCGTCGCTACTACCGATTGAATG  | 1626 |
| Query | 1621 | GCTTAGTGAGGCCTCCGGATTGGTTTAAAGAAGGGGGCAACTCCATCTTGAACCGAAAA       | 1680 |
| Sbjct | 1627 | <br>GCTTAGTGAGGCCTCCGGATTGGTTTAAAGAAGGGGGCAACTCCATCTTGAACCGAAAA   | 1686 |
| Query | 1681 | GCTGGTCAAACCTGGTCATTTAGAGGAAGTAAAAGTCGTAACAA                      | 1724 |
| Sbjct | 1687 | <br>GCTGGTCAAACCTGGTCATTTAGAGGAAGTAAAAGTCGTAACAA                  | 1730 |

>dbj|AB013579.1| Candida quercitrusa 18S rRNA gene, strain JCM 9832, partial sequence  
Length=1782

Score = 3118 bits (1688), Expect = 0.0  
Identities = 1736/1758 (98%), Gaps = 7/1758 (0%)  
Strand=Plus/Plus

|       |     |                                                                |     |
|-------|-----|----------------------------------------------------------------|-----|
| Query | 3   | GCCATGCATGTCTAAGTATAAGCAATTTATACAGTGAAACTGCGAATGGCTCATTAAATC   | 62  |
|       |     |                                                                |     |
| Sbjct | 30  | GCCATGCATGTCTAAGTATAAGCAATTTATACAGTGAAACTGCGAATGGCTCATTAAATC   | 89  |
| Query | 63  | AGTTATCGTTTATTTGATAGTACCTTTACTACTTGGATAACCGTGGTAATTCTAGAGCTA   | 122 |
|       |     |                                                                |     |
| Sbjct | 90  | AGTTATCGTTTATTTGATAGTACCTTTACTACTTGGATAACCGTGGTAATTCTAGAGCTA   | 149 |
| Query | 123 | ATACATGCTAAAAATCCCGACTGTTTGGGAAGGGATGTATTTATTAGATAAAAAATCAATG  | 182 |
|       |     |                                                                |     |
| Sbjct | 150 | ATACATGCTAAAAATCCCGACT-TCTGGAAGGGATGTATTTATTAGATAAAAAATCAATG   | 208 |
| Query | 183 | CT-TTTCGGAGCTCTTTGATGATTTCATAATAACTTTTTCGAATCGCATGGCCTTGTGCTGG | 241 |
|       |     |                                                                |     |
| Sbjct | 209 | CTCTTT--GAGCTCTTTGATGATTTCATAATAACTTTTTCGAATCGCATGGCCTTGTGCTGG | 266 |
| Query | 242 | CGATGGTTCATTCAAATTTCTGCCCTATCAACTTTCGATGGTAGGATAGTGGCCTACCAT   | 301 |
|       |     |                                                                |     |
| Sbjct | 267 | CGATGGTTCATTCAAATTTCTGCCCTATCAACTTTCGATGGTAGGATAGTGGCCTACCAT   | 326 |
| Query | 302 | GGTTTCAACGGGTAACGGGGAATAAGGGTTCGATTCCGGAGAGGGAGCCTGAGAAACGGC   | 361 |
|       |     |                                                                |     |
| Sbjct | 327 | GGTTTCAACGGGTAACGGGGAATAAGGGTTCGATTCCGGAGAGGGAGCCTGAGAAACGGC   | 386 |
| Query | 362 | TACCACATCCAAGGAAGGCAGCAGGCGCGCAAATTACCCAATCCCGACACGGGGAGGTAG   | 421 |
|       |     |                                                                |     |
| Sbjct | 387 | TACCACATCCAAGGAAGGCAGCAGGCGCGCAAATTACCCAATCCCGACACGGGGAGGTAG   | 446 |
| Query | 422 | TGACAATAAATAACGATACAGGGCCCTTTCGGGTCTTGTAATTGGAATGAGTACAATGTA   | 481 |
|       |     |                                                                |     |
| Sbjct | 447 | TGACAATAAATAACGATACAGGGCCCTTTCGGGTCTTGTAATTGGAATGAGTACAATGTA   | 506 |
| Query | 482 | AATACCTTAACGAGGAACAATTGGAGGGCAAGTCTGGTGCCAGCAGCCGCGGTAATTCCA   | 541 |
|       |     |                                                                |     |
| Sbjct | 507 | AATACCTTAACGAGGAACAATTGGAGGGCAAGTCTGGTGCCAGCAGCCGCGGTAATTCCA   | 566 |
| Query | 542 | GCTCCAATAGCGTATATTAAGTTGTTGCAGTTAAAAAGCTCGTAGTTGAACCTTGGGCT    | 601 |
|       |     |                                                                |     |
| Sbjct | 567 | GCTCCAATAGCGTATATTAAGTTGTTGCAGTTAAAAAGCTCGTAGTTGAACCTTGGGCT    | 626 |
| Query | 602 | TGTTTGGCCGGTCCGCCTTTTTGGCGAGTACTGGACCCAACCGAGCCTTTCCTTCTGGCT   | 661 |
|       |     |                                                                |     |
| Sbjct | 627 | TGTTTGGCCGGTCCG-CTTTATGGCGAGTACTGGACCCAACCGAGCCTTTCCTTCTGGCT   | 685 |
| Query | 662 | AACCTTTCGCCCTTGTGGTGTGGCGAACCAGGACTTTTACTTTGAAAAAATTAGAGTG     | 721 |
|       |     |                                                                |     |
| Sbjct | 686 | AACCTTTCACCTTTTGGTGTCTGGCGAACCAGGACTTTTACTTTGAAAAAATTAGAGTG    | 745 |
| Query | 722 | TTCAAAGCAGGCCTTTGCTCGAATATATTAGCATGGAATAATAGAATAGGACGTTATGGT   | 781 |
|       |     |                                                                |     |
| Sbjct | 746 | TTCAAAGCAGGCCTTTGCTCGAATATATTAGCATGGAATAATAGAATAGGACGTTATGGT   | 805 |
| Query | 782 | TCTATTTTGTGGTTTCTAGGACCATCGTAATGATTAATAGGGACGGTCGGGGGCATCAG    | 841 |
|       |     |                                                                |     |
| Sbjct | 806 | TCTATTTTGTGGTTTCTAGGACCATCGTAATGATTAATAGGGACGGTCGGGGGCATCAG    | 865 |
| Query | 842 | TATTCAGTTGTCAGAGGTGAAATTCTTGGA-TTACCTGAAGACTAACTACTGCGAAAGCA   | 900 |
|       |     |                                                                |     |
| Sbjct | 866 | TATTCAGTTGTCAGAGGTGAAATTCTTGATTTA-CTGAAGACTAACTACTGCGAAAGCA    | 924 |
| Query | 901 | TTTGCCAAGGACGTTTTTCATTAATCAAGAACGAAAGTTAGGGGATCGAAGATGATCAGAT  | 960 |
|       |     |                                                                |     |
| Sbjct | 925 | TTTGCCAAGGACGTTTTTCATTAATCAAGAACGAAAGTTAGGGGATCGAAGATGATCAGAT  | 984 |

```

Query 961 ACCGTCGTAGTCTTAACCATAAACTATGCCGACTAGGGATCGGGTGTGTTCTtttttttG 1020
          |||
Sbjct 985 ACCGTCGTAGTCTTAACCATAAACTATGCCGACTAGGGATCGGGTGTGTTCTTTTTTTG 1044

Query 1021 ACGCACTCGGCACCTTACGAGAAATCAAAGTCTTTGGGTTCTGGGGGAGTATGGTCGCA 1080
          |||
Sbjct 1045 ACGCACTCGGCACCTTACGAGAAATCAAAGTCTTTGGGTTCTGGGGGAGTATGGTCGCA 1104

Query 1081 AGGCTGAAACTTAAAGGAATTGACGGAAGGGCACCACCAGGAGTGGAGCCTGCGGCTTAA 1140
          |||
Sbjct 1105 AGGCTGAAACTTAAAGGAATTGACGGAAGGGCACCACCAGGAGTGGAGCCTGCGGCTTAA 1164

Query 1141 TTTGACTCAACACGGGGAACTCACCAGGTCCAGACACAATAAGGATTGACAGATTGAGA 1200
          |||
Sbjct 1165 TTTGACTCAACACGGGGAACTCACCAGGTCCAGACACAATGAGGATTGACAGATTGAGA 1224

Query 1201 GCTCTTTCTTGATTTTGTGGGTGGTGGTGCATGGCCGTTCTTAGTTGGTGGAGTGATTTG 1260
          |||
Sbjct 1225 GCTCTTTCTTGATTTTGTGGGTGGTGGTGCATGGCCGTTCTTAGTTGGTGGAGTGATTTG 1284

Query 1261 TCTGCTTAATTGCGATAACGAACGAGACCTTAACCTACTAAATAGTGCTGCTAGCTTTTG 1320
          |||
Sbjct 1285 TCTGCTTAATTGCGATAACGAACGAGACCTTAACCTACTAAATAGTGCTGCTAGCTTTTG 1344

Query 1321 CTGGTATAGTCACTTCTTAGAGGGACTATCGATTTCAAGTCGATGGAAGTTTGAGGCAAT 1380
          |||
Sbjct 1345 CTGGTATAGTCACTTCTTAGAGGGACTATCGATTTCAAGTCGATGGAAGTTTGAGGCAAT 1404

Query 1381 AACAGGTCTGTGATGCCCTTAGACGTTCTGGGCCGCACGCGGCTTACTGACGGAGCCA 1440
          |||
Sbjct 1405 AACAGGTCTGTGATGCCCTTAGACGTTCTGGGCCGCACGCGGCTTACTGACGGAGCCA 1464

Query 1441 ACGAGTATTAACCTTGGCCGAGAGGTCTGGGAAATCTTGTGAAACTCCGTCGTGCTGGGG 1500
          |||
Sbjct 1465 GCGAGTTTTTAACCTTGGCCGAGAGGTCTGGGTAATCTTGTGAAACTCCGTCGTGCTGGGG 1524

Query 1501 ATAGAGCATTGTAATTATTGCTCTTCAACGAGGAATTCCTAGTAAGCGCAAGTCATCAGC 1560
          |||
Sbjct 1525 ATAGAGCATTGTAATTATTGCTCTTCAACGAGGAATTCCTAGTAAGCGCAAGTCATCAGC 1584

Query 1561 TTGCGTTGATTACGTCCCTGCCCTTTGTACACACCGCCCGTCGCTACTACCGATTGAATG 1620
          |||
Sbjct 1585 TTGCGTTGATTACGTCCCTGCCCTTTGTACACACCGCCCGTCGCTACTACCGATTGAATG 1644

Query 1621 GCTTAGTGAGGCCTCCGGATTGGTTTAAAGAAGGGGGCAACTCCATCTTGAACCGAAAA 1680
          |||
Sbjct 1645 GCTTAGTGAGGCCTCCGGATTGGTTTAAAGAAGGGGGCAACTCCATCTTGAACCGAAAA 1704

Query 1681 GCTGGTCAAACCTGGTCATTTAGAGGAAGTAAAAGTCGTAACAAGGTTTCCGTAGGTGAA 1740
          |||
Sbjct 1705 GCTAGTCAAACCTGGTCATTTAGAGGAAGTAAAAGTCGTAACAAGGTTTCCGTAGGTGAA 1764

Query 1741 CCTGCGGAAGGATCATT 1758
          |||
Sbjct 1765 CCTGCGGAAGGATCATT 1782

```

>dbj|AB013541.1| *Candida natalensis* 18S rRNA gene, strain JCM 1445, partial sequence  
Length=1781

Score = 3118 bits (1688), Expect = 0.0  
Identities = 1736/1758 (98%), Gaps = 8/1758 (0%)  
Strand=Plus/Plus





```

Query 961 ACCGTCGTAGTCTTAACCATAAACTATGCCGACTAGGGATCGGGTGTGTTCTtttttttG 1020
      |||
Sbjct 985 ACCGTCGTAGTCTTAACCATAAACTATGCCGACTAGGGATCGGGTGTGTTCTTTTTTTG 1044

Query 1021 ACGCACTCGGCACCTTACGAGAAATCAAAGTCTTTGGGTTCTGGGGGAGTATGGTCGCA 1080
      |||
Sbjct 1045 ACGCACTCGGCACCTTACGAGAAATCAAAGTCTTTGGGTTCTGGGGGAGTATGGTCGCA 1104

Query 1081 AGGCTGAAACTTAAAGGAATTGACGGAAGGGCACCACCAGGAGTGGAGCCTGCGGCTTAA 1140
      |||
Sbjct 1105 AGGCTGAAACTTAAAGGAATTGACGGAAGGGCACCACCAGGAGTGGAGCCTGCGGCTTAA 1164

Query 1141 TTTGACTCAACACGGGGAAACTCACCAGGTCCAGACACAATAAGGATTGACAGATTGAGA 1200
      |||
Sbjct 1165 TTTGACTCAACACGGGGAAACTCACCAGGTCCAGACACAATGAGGATTGACAGATTGAGA 1224

Query 1201 GCTCTTTCTTGATTTTGTGGGTGGTGGTGCATGGCCGTTCTTAGTTGGTGGAGTGATTTG 1260
      |||
Sbjct 1225 GCTCTTTCTTGATTTTGTGGGTGGTGGTGCATGGCCGTTCTTAGTTGGTGGAGTGATTTG 1284

Query 1261 TCTGCTTAATTGCGATAACGAACGAGACCTTAACCTACTAAATAGTGCTGCTAGCTTTTG 1320
      |||
Sbjct 1285 TCTGCTTAATTGCGATAACGAACGAGACCTTAACCTACTAAATAGTGCTGCTAGCTTTTG 1344

Query 1321 CTGGTATAGTCACTTCTTAGAGGGACTATCGATTTCAAGTCGATGGAAGTTTGAGGCAAT 1380
      |||
Sbjct 1345 CTGGTATAGTCACTTCTTAGAGGGACTATCGATTTCAAGTCGATGGAAGTTTGAGGCAAT 1404

Query 1381 AACAGGTCTGTGATGCCCTTAGACGTTCTGGGCCGCACGCGCGCTACACTGACGGAGCCA 1440
      |||
Sbjct 1405 AACAGGTCTGTGATGCCCTTAGACGTTCTGGGCCGCACGCGCGCTACACTGACGGAGCCA 1464

Query 1441 ACGAGTATTAACCTTGGCCGAGAGGTCTGGGAAATCTTGTGAAACTCCGTCGTGCTGGGG 1500
      |||
Sbjct 1465 GCGAGTTTTTAACCTTGGCCGAGAGGTCTGGGTAATCTTGTGAAACTCCGTCGTGCTGGGG 1524

Query 1501 ATAGAGCATTGTAATTATTGCTCTTCAACGAGGAATTCCTAGTAAGCGCAAGTCATCAGC 1560
      |||
Sbjct 1525 ATAGAGCATTGTAATTATTGCTCTTCAACGAGGAATTCCTAGTAAGCGCAAGTCATCAGC 1584

Query 1561 TTGCGTTGATTACGTCCCTGCCCTTTGTACACACCGCCCGTCGCTACTACCGATTGAATG 1620
      |||
Sbjct 1585 TTGCGTTGATTACGTCCCTGCCCTTTGTACACACCGCCCGTCGCTACTACCGATTGAATG 1644

Query 1621 GCTTAGTGAGGCCTCCGGATTGGTTTAAAGAAGGGGGCAACTCCATCTTGAACCGAAAA 1680
      |||
Sbjct 1645 GCTTAGTGAGGCCTCCGGATTGGTTTAAAGAAGGGGGCAACTCCATCTTGAACCGAAAA 1704

Query 1681 GCTGGTCAAACCTGGTCATTTAGAGGAAGTAAAAGTCGTAACAAGGTTTCCGTAGGTGAA 1740
      |||
Sbjct 1705 GCTAGTCAAACCTGGTCATTTAGAGGAAGTAAAAGTCGTAACAAGGTTTCCGTAG-TGAA 1763

Query 1741 CCTGCGGAAGGATCATTA 1758
      |||
Sbjct 1764 CCTGCGGAAGGATCATTA 1781

```

>gb|DQ534404.1| *Debaryomyces hansenii* strain JHSa 18S ribosomal RNA gene, partial sequence  
Length=1741

Score = 3114 bits (1686), Expect = 0.0  
Identities = 1711/1722 (99%), Gaps = 6/1722 (0%)

Strand=Plus/Plus

|       |     |                                                               |     |
|-------|-----|---------------------------------------------------------------|-----|
| Query | 3   | GCCATGCATGTCTAAGTATAAGCAATTTATACAGTGAAACTGCGAATGGCTCATTAAATC  | 62  |
|       |     |                                                               |     |
| Sbjct | 17  | GCCATGCATGTCTAAGTATAAGCAATTTATACAGTGAAACTGCGAATGGCTCATTAAATC  | 76  |
| Query | 63  | AGTTATCGTTTATTTGATAGTACCTTTACTACTTGGATAAACCGTGGTAATTCTAGAGCTA | 122 |
|       |     |                                                               |     |
| Sbjct | 77  | AGTTATCGTTTATTTGATAGTACCTTTACTACTTGGATAAACCGTGGTAATTCTAGAGCTA | 136 |
| Query | 123 | ATACATGCTAAAAATCCCGACTGTTTGAAGGGATGTATTTATTAGATAAAAAATCAATG   | 182 |
|       |     |                                                               |     |
| Sbjct | 137 | ATACATGCTAAAAATCCCGACTGTTTGAAGGGATGTATTTATTAGATAAAAAATCAATG   | 196 |
| Query | 183 | CT-TTTCGGAGCTCTTTGATGATTCAATAAATCTTTTCGAATCGCATGGCCTTGTGCTGG  | 241 |
|       |     |                                                               |     |
| Sbjct | 197 | CTCTTT--GAGCTCTTTGATGATTCAATAAATCTTTTCGAATCGCATGGCCTTGTGCTGG  | 254 |
| Query | 242 | CGATGGTTCATTCAAATTTCTGCCCTATCAACTTTTCGATGGTAGGATAGTGGCCTACCAT | 301 |
|       |     |                                                               |     |
| Sbjct | 255 | CGATGGTTCATTCAAATTTCTGCCCTATCAACTTTTCGATGGTAGGATAGTGGCCTACCAT | 314 |
| Query | 302 | GGTTTCAACGGGTAACGGGGAATAAGGGTTCGATTCCGGAGAGGGAGCCTGAGAAACGGC  | 361 |
|       |     |                                                               |     |
| Sbjct | 315 | GGTTTCAACGGGTAACGGGGAATAAGGGTTCGATTCCGGAGAGGGAGCCTGAGAAACGGC  | 374 |
| Query | 362 | TACCACATCCAAGGAAGGCAGCAGGCGCGCAAATTACCCAATCCCGACACGGGGAGGTAG  | 421 |
|       |     |                                                               |     |
| Sbjct | 375 | TACCACATCCAAGGAAGGCAGCAGGCGCGCAAATTACCCAATCCCGACACGGGGAGGTAG  | 434 |
| Query | 422 | TGACAATAAATAACGATACAGGGCCCTTTTCGGGTCTTGTAATTGGAATGAGTACAATGTA | 481 |
|       |     |                                                               |     |
| Sbjct | 435 | TGACAATAAATAACGATACAGGGCCCTTTTCGGGTCTTGTAATTGGAATGAGTACAATGTA | 494 |
| Query | 482 | AATACCTTAACGAGGAACAATTGGAGGGCAAGTCTGGTGCCAGCAGCCGCGGTAATTCCA  | 541 |
|       |     |                                                               |     |
| Sbjct | 495 | AATACCTTAACGAGGAACAATTGGAGGGCAAGTCTGGTGCCAGCAGCCGCGGTAATTCCA  | 554 |
| Query | 542 | GCTCCAATAGCGTATATTAAGTTGTTGCAGTTAAAAAGCTCGTAGTTGAACCTTGGGCT   | 601 |
|       |     |                                                               |     |
| Sbjct | 555 | GCTCCAATAGCGTATATTAAGTTGTTGCAGTTAAAAAGCTCGTAGTTGAACCTTGGGCT   | 614 |
| Query | 602 | TGTTTGGCCGGTCCGCCTTTTTGGCGAGTACTGGACCCAACCGAGCCTTTCCTTCTGGCT  | 661 |
|       |     |                                                               |     |
| Sbjct | 615 | TGTTTGGCCGGTCCGCCTTTTTGGCGAGTACTGGACCCAACCGAGCCTTTCCTTCTGGCT  | 674 |
| Query | 662 | AACCTTTCGCCCTTGTGGTGTGGCGAACCAGGACTTTTACTTTGAAAAAATTAGAGTG    | 721 |
|       |     |                                                               |     |
| Sbjct | 675 | AACCATTCGCCCTTGTGGTGTGGCGAACCAGGACTTTTACTTTGAAAAAATTAGAGTG    | 734 |
| Query | 722 | TTCAAAGCAGGCCTTTGCTCGAATATATTAGCATGGAATAATAGAATAGGACGTTATGGT  | 781 |
|       |     |                                                               |     |
| Sbjct | 735 | TTCAAAGCAGGCCTTTGCTCGAATATATTAGCATGGAATAATAGAATAGGACGTTATGGT  | 794 |
| Query | 782 | TCTATTTTGTGGTTTCTAGGACCATCGTAATGATTAATAGGGACGGTCGGGGGCATCAG   | 841 |
|       |     |                                                               |     |
| Sbjct | 795 | TCTATTTTGTGGTTTCTAGGACCATCGTAATGATTAATAGGGACGGTCGGGGGCATCAG   | 854 |
| Query | 842 | TATTCAGTTGTCAGAGGTGAAATTCTTGGGA-TTACCTGAAGACTAACTACTGCGAAAGCA | 900 |
|       |     |                                                               |     |
| Sbjct | 855 | TATTCAGTTGTCAGAGGTGAAATTCTTAGATTTA-CTGAAGACTAACTACTGCGAAAGCA  | 913 |
| Query | 901 | TTTGCCAAGGACGTTTTTCATTAATCAAGAACGAAAGTTAGGGGATCGAAGATGATCAGAT | 960 |
|       |     |                                                               |     |

```

Sbjct  914  TTTGCCAAGGACGTTTTTCATTAATCAAGAACGAAAGTTAGGGGATCGAAGATGATCAGAT  973
Query  961  ACCGTCGTAGTCTTAACCATAAACTATGCCGACTAGGGATCGGGTGTGTTCTtttttttG  1020
      |||
Sbjct  974  ACCGTCGTAGTCTTAACCATAAACTATGCCGACTAGGGATCGGGTGTGTTCTTTTTTTG  1033
Query  1021  ACGCACTCGGCACCTTACGAGAAATCAAAGTCTTTGGGTCTGCGGGGAGTATGGTCGCA  1080
      |||
Sbjct  1034  ACGCACTCGGCACCTTACGAGAAATCAAAGTCTTTGGGTCTGCGGGGAGTATGGTCGCA  1093
Query  1081  AGGCTGAAACTTAAAGGAATTGACGGAAGGGCACCACCAGGAGTGGAGCCTGCGGCTTAA  1140
      |||
Sbjct  1094  AGGCTGAAACTTAAAGGAATTGACGGAAGGGCACCACCAGGAGTGGAGCCTGCGGCTTAA  1153
Query  1141  TTTGACTCAACACGGGGAAACTCACCAGGTCCAGACACAATAAGGATTGACAGATTGAGA  1200
      |||
Sbjct  1154  TTTGACTCAACACGGGGAAACTCACCAGGTCCAGACACAATAAGGATTGACAGATTGAGA  1213
Query  1201  GCTCTTTCTTGATTTTGTGGGTGGTGGTGCATGGCCGTTCTTAGTTGGTGGAGTGATTTG  1260
      |||
Sbjct  1214  GCTCTTTCTTGATTTTGTGGGTGGTGGTGCATGGCCGTTCTTAGTTGGTGGAGTGATTTG  1273
Query  1261  TCTGCTTAATTGCGATAACGAACGAGACCTTAACCTACTAAATAGTGCTGCTAGCTTTTG  1320
      |||
Sbjct  1274  TCTGCTTAATTGCGATAACGAACGAGACCTTAACCTACTAAATAGTGCTGCTAGCTTTTG  1333
Query  1321  CTGGTATAGTCACTTCTTAGAGGGACTATCGATTTCAAGTCGATGGAAGTTTGAGGCAAT  1380
      |||
Sbjct  1334  CTGGTATAGTCACTTCTTAGAGGGACTATCGATTTCAAGTCGATGGAAGTTTGAGGCAAT  1393
Query  1381  AACAGGTCTGTGATGCCCTTAGACGTTCTGGGCCGCACGCGCGCTACACTGACGGAGCCA  1440
      |||
Sbjct  1394  AACAGGTCTGTGATGCCCTTAGACGTTCTGGGCCGCACGCGCGCTACACTGACGGAGCCA  1453
Query  1441  ACGAGTATTAACCTTGGCCGAGAGGTCTGGGAAATCTTGTGAAACTCCGTCGTGCTGGGG  1500
      |||
Sbjct  1454  GCGAGTATTAACCTTGGCCGAGAGGTCTGGGAAATCTTGTGAAACTCCGTCGTGCTGGGG  1513
Query  1501  ATAGAGCATTGTAATTATTGCTCTTCAACGAGGAATTCCTAGTAAGCGCAAGTCATCAGC  1560
      |||
Sbjct  1514  ATAGAGCATTGTAATTATTGCTCTTCAACGAGGAATTCCTAGTAAGCGCAAGTCATCAGC  1573
Query  1561  TTGCGTTGATTACGTCCCTGCCCTTTGTACACACCGCCCGTCGCTACTACCGATTGAATG  1620
      |||
Sbjct  1574  TTGCGTTGATTACGTCCCTGCCCTTTGTACACACCGCCCGTCGCTACTACCGATTGAATG  1633
Query  1621  GCTTAGTGAGGCCTCCGGATTGGTTTAAAGAAGGGGGCAACTCCATCTTGAACCGAAAA  1680
      |||
Sbjct  1634  GCTTAGTGAGGCCTCCGGATTGGTTTAAAGAAGGGGGCAACTCCATCTTGAACCGAAAA  1693
Query  1681  GCTGGTCAAACCTGGTCATTTAGAGGAAGTAAAAGTCGTAAC  1722
      |||
Sbjct  1694  GCTGGTCAAACCTGGTCATTTAGAGGAAGTAAAAGTCG-AAC  1734

```

>gb|AY520250.1| *Candida* sp. BG02-5-27-4-5-1 18S ribosomal RNA gene, partial sequence  
Length=1739

Score = 3114 bits (1686), Expect = 0.0  
Identities = 1719/1734 (99%), Gaps = 6/1734 (0%)  
Strand=Plus/Plus

Query 3 GCCATGCATGTCTAAGTATAAGCAATTTATACAGTGAAACTGCGAATGGCTCATTAAATC 62

|       |     |                                                                   |      |
|-------|-----|-------------------------------------------------------------------|------|
| Sbjct | 10  | <br>GCCATGCATGTCTAAGTATAAGCAATTTATACAGTGAAACTGCGAATGGCTCATTAAATC  | 69   |
| Query | 63  | AGTTATCGTTTATTTGATAGTACCTTTACTACTTGGATAACCGTGGTAATTCTAGAGCTA      | 122  |
| Sbjct | 70  | <br>AGTTATCGTTTATTTGATAGTACCTTTACTACTTGGATAACCGTGGTAATTCTAGAGCTA  | 129  |
| Query | 123 | ATACATGCTAAAAATCCCGACTGTTTGGGAAGGGATGTATTTATTAGATAAAAAATCAATG     | 182  |
| Sbjct | 130 | <br>ATACATGCTAAAAATCCCGACT-TCTGGAAGGGATGTATTTATTAGATAAAAAATCAATG  | 188  |
| Query | 183 | CTTTTCGGAGCTCTTTGATGATTCAATAACTTTTCGAATCGCATGGCCTTGTGCTGGC        | 242  |
| Sbjct | 189 | <br>CTTTTCGGAGCTCTTTGATGATTCAATAACTTTTCGAATCGCATGGCCTTGTGCTGGC    | 248  |
| Query | 243 | GATGGTTCATTCAAATTTCTGCCCTATCAACTTTTCGATGGTAGGATAGTGGCCTACCATG     | 302  |
| Sbjct | 249 | <br>GATGGTTCATTCAAATTTCTGCCCTATCAACTTTTCGATGGTAGGATAGTGGCCTACCATG | 308  |
| Query | 303 | GTTTCAACGGGTAACGGGGAATAAGGGTTCGATTCCGGAGAGGGAGCCTGAGAAACGGCT      | 362  |
| Sbjct | 309 | <br>GTTTCAACGGGTAACGGGGAATAAGGGTTCGATTCCGGAGAGGGAGCCTGAGAAACGGCT  | 368  |
| Query | 363 | ACCACATCCAAGGAAGGCAGCAGGCGCGCAAATTACCCAATCCCGACACGGGGAGGTAGT      | 422  |
| Sbjct | 369 | <br>ACCACATCCAAGGAAGGCAGCAGGCGCGCAAATTACCCAATCCCGACACGGGGAGGTAGT  | 428  |
| Query | 423 | GACAATAAATAACGATACAGGGCCCTTTCGGGTCTTGTAAATTGGAATGAGTACAATGTAA     | 482  |
| Sbjct | 429 | <br>GACAATAAATAACGATACAGGGCCCTTTCGGGTCTTGTAAATTGGAATGAGTACAATGTAA | 488  |
| Query | 483 | ATACCTTAACGAGGAACAATTGGAGGGCAAGTCTGGTGCCAGCAGCCGCGGTAATTCCAG      | 542  |
| Sbjct | 489 | <br>ATACCTTAACGAGGAACAATTGGAGGGCAAGTCTGGTGCCAGCAGCCGCGGTAATTCCAG  | 548  |
| Query | 543 | CTCCAATAGCGTATATTAAGTTGTTGCAGTTAAAAGCTCGTAGTTGAACCTTGGGCTT        | 602  |
| Sbjct | 549 | <br>CTCCAATAGCGTATATTAAGTTGTTGCAGTTAAAAGCTCGTAGTTGAACCTTGGGCTT    | 608  |
| Query | 603 | GGTTGGCCGGTCCGCCTTTTTGGCGAGTACTGGACCCAACCGAGCCTTTCCTTCTGGCTA      | 662  |
| Sbjct | 609 | <br>GGTTGGCCGGTCCG-CTTTATGGCGAGTACTGGACCCAACCGAGCCTTTCCTTCTGGCTA  | 667  |
| Query | 663 | ACCTTTCGCCCTTGTGGTGTGGGGAACCAGGACTTTTACTTTGAAAAATTAGAGTGT         | 722  |
| Sbjct | 668 | <br>ACCTTTCGCCCTTGTGGTGTGGGGAACCAGGACTTTTACTTTGAAAAATTAGAGTGT     | 727  |
| Query | 723 | TCAAAGCAGGCCTTTGCTCGAATATATTAGCATGGAATAATAGAATAGGACGTTATGGTT      | 782  |
| Sbjct | 728 | <br>TCAAAGCAGGCCTTTGCTCGAATATATTAGCATGGAATAATAGAATAGGACGTTATGGTT  | 787  |
| Query | 783 | CTATTTTGTGGTTTCTAGGACCATCGTAATGATTAATAGGGACGGTCGGGGGCATCAGT       | 842  |
| Sbjct | 788 | <br>CTATTTTGTGGTTTCTAGGACCATCGTAATGATTAATAGGGACGGTCGGGGGCATCAGT   | 847  |
| Query | 843 | ATTCCAGTTGTCAGAGGTGAAATTCTTGGA-TTACCTGAAGACTAACTACTGCGAAAGCAT     | 901  |
| Sbjct | 848 | <br>ATTCCAGTTGTCAGAGGTGAAATTCTTGGA-TTACCTGAAGACTAACTACTGCGAAAGCAT | 906  |
| Query | 902 | TTGCCAAGGACGTTTTCATTAATCAAGAACGAAAGTTAGGGGATCGAAGATGATCAGATA      | 961  |
| Sbjct | 907 | <br>TTGCCAAGGACGTTTTCATTAATCAAGAACGAAAGTTAGGGGATCGAAGATGATCAGATA  | 966  |
| Query | 962 | CCGTCGTAGTCTTAACCATAAACTATGCCGACTAGGGATCGGGTGTGTTCTtttttttGA      | 1021 |

|       |      |                                                                  |      |
|-------|------|------------------------------------------------------------------|------|
| Sbjct | 967  | <br>CCGTCGTAGTCTTAACCATAAACTATGCCGACTAGGGATCGGGTGTGTTCTTTTTTTGA  | 1026 |
| Query | 1022 | CGCACTCGGCACCTTACGAGAAATCAAAGTCTTTGGGTTCTGGGGGAGTATGGTCGCAA      | 1081 |
| Sbjct | 1027 | <br>CGCACTCGGCACCTTACGAGAAATCAAAGTCTTTGGGTTCTGGGGGAGTATGGTCGCAA  | 1086 |
| Query | 1082 | GGCTGAAACTTAAAGGAATTGACGGAAGGGCACCACCAGGAGTGGAGCCTGCGGCTTAAT     | 1141 |
| Sbjct | 1087 | <br>GGCTGAAACTTAAAGGAATTGACGGAAGGGCACCACCAGGAGTGGAGCCTGCGGCTTAAT | 1146 |
| Query | 1142 | TTGACTCAACACGGGGAAACTCACCAGGTCCAGACACAATAAGGATTGACAGATTGAGAG     | 1201 |
| Sbjct | 1147 | <br>TTGACTCAACACGGGGAAACTCACCAGGTCCAGACACAATAAGGATTGACAGATTGAGAG | 1206 |
| Query | 1202 | CTCTTTCTTGATTTTGTGGGTGGTGGTGCATGGCCGTTCTTAGTTGGTGGAGTGATTTGT     | 1261 |
| Sbjct | 1207 | <br>CTCTTTCTTGATTTTGTGGGTGGTGGTGCATGGCCGTTCTTAGTTGGTGGAGTGATTTGT | 1266 |
| Query | 1262 | CTGCTTAATTGCGATAACGAACGAGACCTTAACCTACTAAATAGTGCTGCTAGCTTTTGC     | 1321 |
| Sbjct | 1267 | <br>CTGCTTAATTGCGATAACGAACGAGACCTTAACCTACTAAATAGTGCTGCTAGCTTTTGC | 1326 |
| Query | 1322 | TGGTATAGTCACTTCTTAGAGGGACTATCGATTTCAAGTCGATGGAAGTTTGAGGCAATA     | 1381 |
| Sbjct | 1327 | <br>TGGTATAGTCACTTCTTAGAGGGACTATCGATTTCAAGTCGATGGAAGTTTGAGGCAATA | 1386 |
| Query | 1382 | ACAGGTCTGTGATGCCCTTAGACGTTCTGGGCCGCACGCGCGCTACACTGACGGAGCCAA     | 1441 |
| Sbjct | 1387 | <br>ACAGGTCTGTGATGCCCTTAGACGTTCTGGGCCGCACGCGCGCTACACTGACGGAGCCAG | 1446 |
| Query | 1442 | CGAGTAT-TAACCTTGGCCGAGAGGTCTGGGAAATCTTGTGAAACTCCGTCGTGCTGGGG     | 1500 |
| Sbjct | 1447 | <br>CGAGT-TCTAACCTTGGCCGAGAGGTCTGGGTAATCTTGTGAAACTCCGTCGTGCTGGGG | 1505 |
| Query | 1501 | ATAGAGCATTGTAATTATTGCTCTTCAACGAGGAATTCCTAGTAAGCGCAAGTCATCAGC     | 1560 |
| Sbjct | 1506 | <br>ATAGAGCATTGTAATTATTGCTCTTCAACGAGGAATTCCTAGTAAGCGCAAGTCATCAGC | 1565 |
| Query | 1561 | TTGCGTTGATTACGTCCCTGCCCTTTGTACACACCGCCCGTCGCTACTACCGATTGAATG     | 1620 |
| Sbjct | 1566 | <br>TTGCGTTGATTACGTCCCTGCCCTTTGTACACACCGCCCGTCGCTACTACCGATTGAATG | 1625 |
| Query | 1621 | GCTTAGTGAGGCCTCCGGATTGGTTTAAAGAAGGGGGCAACTCCATCTTGAACCGAAAA      | 1680 |
| Sbjct | 1626 | <br>GCTTAGTGAGGCCTCCGGATTGGTTTAAAGAAGGGGGCAACTCCATCTTGAACCGAAAA  | 1685 |
| Query | 1681 | GCTGGTCAAACCTGGTCATTTAGAGGAAGTAAAAGTCGTAACAAGGTTTCCGTA           | 1734 |
| Sbjct | 1686 | <br>GCTAGTCAAACCTGGTCATTTAGAGGAAGTAAAAGTCGTAACAAGGTTTCCGTA       | 1739 |

>dbj|AB054263.1| *Debaryomyces occidentalis* var. *personii* gene for 18S rRNA, partial sequence, strain:JCM 8127  
Length=1753

Score = 3112 bits (1685), Expect = 0.0  
Identities = 1718/1735 (99%), Gaps = 4/1735 (0%)  
Strand=Plus/Plus

|       |    |                                                                  |    |
|-------|----|------------------------------------------------------------------|----|
| Query | 3  | GCCATGCATGTCTAAGTATAAGCAATTTATACAGTGAAACTGCGAATGGCTCATTAAATC     | 62 |
| Sbjct | 21 | <br>GCCATGCATGTCTAAGTATAAGCAATTTATACAGTGAAACTGCGAATGGCTCATTAAATC | 80 |





|       |      |                                                                   |      |
|-------|------|-------------------------------------------------------------------|------|
| Sbjct | 81   | <br>AGTTATCGTTTATTTGATAGTACCTTTACTACTTGGATAACCGTGGTAATTCTAGAGCTA  | 140  |
| Query | 123  | ATACATGCTAAAAATCCCGACTGTTTGGGAAGGGATGTATTTATTAGATAAAAAATCAATG     | 182  |
| Sbjct | 141  | <br>ATACATGCTAAAAATCCCGACTGTTTGGGAAGGGATGTATTTATTAGATAAAAAATCAATG | 200  |
| Query | 183  | CTTTTCGGAGCTCTTTGATGATTATAATAACTTTTCGAATCGCATGGCCTTGTGCTGGC       | 242  |
| Sbjct | 201  | <br>CTTTTCGGAGCTCTTTGATGATTATAATAACTTTTCGAATCGCATGGCCTTGTGCTGGC   | 260  |
| Query | 243  | GATGGTTCATTCAAATTTCTGCCCTATCAACTTTTCGATGGTAGGATAGTGGCCTACCATG     | 302  |
| Sbjct | 261  | <br>GATGGTTCATTCAAATTTCTGCCCTATCAACTTTTCGATGGTAGGATAGTGGCCTACCATG | 320  |
| Query | 303  | GTTTCAACGGGTAACGGGGAATAAGGGTTCGATTCCGGAGAGGGAGCCTGAGAAACGGCT      | 362  |
| Sbjct | 321  | <br>GTTTCAACGGGTAACGGGGAATAAGGGTTCGATTCCGGAGAGGGAGCCTGAGAAACGGCT  | 380  |
| Query | 363  | ACCACATCCAAGGAAGGCAGCAGGCGCGCAAATTACCCAATCCCGACACGGGGAGGTAGT      | 422  |
| Sbjct | 381  | <br>ACCACATCCAAGGAAGGCAGCAGGCGCGCAAATTACCCAATCCCGACACGGGGAGGTAGT  | 440  |
| Query | 423  | GACAATAAATAACGATACAGGGCCCTTTTCGGGTCTTGTAATTGGAATGAGTACAATGTAA     | 482  |
| Sbjct | 441  | <br>GACAATAAATAACGATACAGGGCC-TTTCGGGTCTTGTAATTGGAATGAGTACAATGTAA  | 499  |
| Query | 483  | ATACCTTAACGAGGAACAATTGGAGGGCAAGTCTGGTGCCAGCAGCCGCGGTAATTCCAG      | 542  |
| Sbjct | 500  | <br>ATACCTTAACGAGGAACAATTGGAGGGCAAGTCTGGTGCCAGCAGCCGCGGTAATTCCAG  | 559  |
| Query | 543  | CTCCAATAGCGTATATTAAAGTTGTTGCAGTTAAAAAGCTCGTAGTTGAACCTTGGGCTT      | 602  |
| Sbjct | 560  | <br>CTCCAATAGCGTATATTAAAGTTGTTGCAGTTAAAAAGCTCGTAGTTGAACCTTGGGCTT  | 619  |
| Query | 603  | GGTTGGCCGGTCCGCCTTTTTGGCGAGTACTGGACCCAACCGAGCCTTTCCTTCTGGCTA      | 662  |
| Sbjct | 620  | <br>GGTTGGCCGGTCCGCCTTTTTGGCGGTGTACTGGACCCAACCGAGCCTTTCCTTCTGGCTA | 679  |
| Query | 663  | ACCTTTCGCCCTTGTGGTGTGGCGAACCAGGACTTTTACTTTGAAAAATTAGAGTGT         | 722  |
| Sbjct | 680  | <br>ACCTTTCGCCCTTGTGGTGTGGCGAACCAGGACTTTTACTTTGAAAAATTAGAGTGT     | 739  |
| Query | 723  | TCAAAGCAGGCCTTTGCTCGAATATATTAGCATGGAATAATAGAATAGGACGTTATGGTT      | 782  |
| Sbjct | 740  | <br>TCAAAGCAGGCCTTTGCTCGAATATATTAGCATGGAATAATAGAATAGGACGTTATGGTT  | 799  |
| Query | 783  | CTATTTTGTGGTTTCTAGGACCATCGTAATGATTAATAGGGACGGTCGGGGGCATCAGT       | 842  |
| Sbjct | 800  | <br>CTATTTTGTGGTTTCTAGGACCATCGTAATGATTAATAGGGACGGTCGGGGGCATCAGT   | 859  |
| Query | 843  | ATTCAGTTGTCAGAGGTGAAATTCTTGGATT-ACCTGAAGACTAACTACTGCGAAAGCAT      | 901  |
| Sbjct | 860  | <br>ATTCAGTTGTCAGAGGTGAAATTCTTGGATT-TGAAGACTAACTACTGCGAAAGCAT     | 918  |
| Query | 902  | TTGCCAAGGACGTTTTCATTAATCAAGAACGAAAGTTAGGGGATCGAAGATGATCAGATA      | 961  |
| Sbjct | 919  | <br>TTGCCAAGGACGTTTTCATTAATCAAGAACGAAAGTTAGGGGATCGAAGATGATCAGATA  | 978  |
| Query | 962  | CCGTCGTAGTCTTAACCATAAACTATGCCGACTAGGGATCGGGTGTGTTCTtttttttGA      | 1021 |
| Sbjct | 979  | <br>CCGTCGTAGTCTTAACCATAAACTATGCCGACTAGGGATCGGGTGTGTTCTTTTTTTTGA  | 1038 |
| Query | 1022 | CGCACTCGGCACCTTACGAGAAATCAAAGTCTTTGGGTTCTGGGGGAGTATGGTCGCAA       | 1081 |



|       |      |                                                                   |      |
|-------|------|-------------------------------------------------------------------|------|
| Sbjct | 1039 | <br>CGCACTCGGCACCTTACGAGAAATCAAAGTCTTTGGGTTCTGGGGGAGTATGGTCGCAA   | 1098 |
| Query | 1082 | GGCTGAAACTTAAAGGAATTGACGGAAGGGCACCACCAGGAGTGGAGCCTGCGGCTTAAT      | 1141 |
| Sbjct | 1099 | <br>GGCTGAAACTTAAAGGAATTGACGGAAGGGCACCACCAGGAGTGG-GACTGCGGCTTAAT  | 1157 |
| Query | 1142 | TTGACTCAACACGGGGAAACTCACCAGGTCCAGACACAATAAGGATTGACAGATTGAGAG      | 1201 |
| Sbjct | 1158 | <br>TTGACTCAACACGGGGAAACTCACCAGGTCCAGACACAATAAGGATTGACAGATTGAGAG  | 1217 |
| Query | 1202 | CTCTTTCTTGATTTTGTGGGTGGTGGTGCATGGCCGTTCTTAGTTGGTGGAGTGATTTGT      | 1261 |
| Sbjct | 1218 | <br>CTCTTTCTTGATTTTGTGGGTGGTGGTGCATGGCCGTTCTTAGTTGGTGGAGTGATTTGT  | 1277 |
| Query | 1262 | CTGCTTAATTGCGATAACGAACGAGACCTTAACCTACTAAATAGTGCTGCTAGCTTTTGC      | 1321 |
| Sbjct | 1278 | <br>CTGCTTAATTNNGATAACGAACGAGACCTTAACCTACTAAATAGTGCTGCTAGCATAAGC  | 1337 |
| Query | 1322 | TGGTATAGTCACTTCTTAGAGGGACTATCGATTTCAAGTCGATGGAAGTTTGAGGCAATA      | 1381 |
| Sbjct | 1338 | <br>TGGTATAGTCACTTCTTAGAGGGACTATCGATTTCAAGTCGATGGAAGTTTGAGGCAATA  | 1397 |
| Query | 1382 | ACAGGTCTGTGATGCCCTTAGACGTTCTGGGCCGCACGCGCGCTTACACTGACGGAGCCAA     | 1441 |
| Sbjct | 1398 | <br>ACAGGTCTGTGATGCCCTTAGACGTTCTGGGCCGCACGCGCGCTTACACTGACGGAGCCAG | 1457 |
| Query | 1442 | CGAGTATTAACCTTGGCCGAGAGGTCTGGGAAATCTTGTGAAACTCCGTCGTGCTGGGGA      | 1501 |
| Sbjct | 1458 | <br>CGAGTATTAACCTTGGCCGAGAGGTCTGGGAAATCTTGTGAAACTCCGTCGTGCTGGGGA  | 1517 |
| Query | 1502 | TAGAGCATTGTAATTATTGCTCTTCAACGAGGAATTCCTAGTAAGCGCAAGTCATCAGCT      | 1561 |
| Sbjct | 1518 | <br>TAGAGCATTGTAATTATTGCTCTTCAACGAGGAATTCCTAGTAAGCGCAAGTCATCAGCT  | 1577 |
| Query | 1562 | TGCGTTGATTACGTCCCTGCCCTTTGTACACACCGCCCGTCGCTACTACCGATTGAATGG      | 1621 |
| Sbjct | 1578 | <br>TGCGTTGATTACGTCCCTGCCCTTTGTACACACCGCCCGTCGCTACTACCGATTGAATGG  | 1637 |
| Query | 1622 | CTTAGTGAGGCCTCCGGATTGGTTTTAAAGAAGGGGGCAACTCCATCTTGAACCGAAAAG      | 1681 |
| Sbjct | 1638 | <br>CTTAGTGAGGCCTCCGGATTGGTTTTAAAGAAGGGGGCAACTCCATCTTGAACCGAAAAG  | 1697 |
| Query | 1682 | CTGGTCAAACCTTGGTCATTTAGAGGAAGTAAAAGTCGTAACAAGGTTTCCGTAG           | 1735 |
| Sbjct | 1698 | <br>CTAGTCAAACCTTGGTCATTTAGAGGAAGTAAAAGTCGTAACAAGGTTTCCGTAG       | 1751 |

>gb|AY520269.1| *Candida* sp. BG02-5-27-4-2-1 18S ribosomal RNA gene, partial sequence  
Length=1739

Score = 3109 bits (1683), Expect = 0.0  
Identities = 1718/1734 (99%), Gaps = 6/1734 (0%)  
Strand=Plus/Plus

|       |    |                                                                  |     |
|-------|----|------------------------------------------------------------------|-----|
| Query | 3  | GCCATGCATGTCTAAGTATAAGCAATTTATACAGTGAAACTGCGAATGGCTCATTAAATC     | 62  |
| Sbjct | 10 | <br>GCCATGCATGTCTAAGTATAAGCAATTTATACAGTGAAACTGCGAATGGCTCATTAAATC | 69  |
| Query | 63 | AGTTATCGTTTATTTGATAGTACCTTTACTACTTGGATAACCGTGGTAATTCTAGAGCTA     | 122 |
| Sbjct | 70 | <br>AGTTATCGTTTATTTGATAGTACCTTTACTACTTGGATAGCCGTGGTAATTCTAGAGCTA | 129 |



|       |      |                                                              |      |
|-------|------|--------------------------------------------------------------|------|
| Query | 1082 | GGCTGAAACTTAAAGGAATTGACGGAAGGGCACCACCAGGAGTGGAGCCTGCGGCTTAAT | 1141 |
|       |      |                                                              |      |
| Sbjct | 1087 | GGCTGAAACTTAAAGGAATTGACGGAAGGGCACCACCAGGAGTGGAGCCTGCGGCTTAAT | 1146 |
| Query | 1142 | TTGACTCAACACGGGGAAACTCACCAGGTCCAGACACAATAAGGATTGACAGATTGAGAG | 1201 |
|       |      |                                                              |      |
| Sbjct | 1147 | TTGACTCAACACGGGGAAACTCACCAGGTCCAGACACAATAAGGATTGACAGATTGAGAG | 1206 |
| Query | 1202 | CTCTTTCTTGATTTTGTGGGTGGTGGTGCATGGCCGTTCTTAGTTGGTGGAGTGATTTGT | 1261 |
|       |      |                                                              |      |
| Sbjct | 1207 | CTCTTTCTTGATTTTGTGGGTGGTGGTGCATGGCCGTTCTTAGTTGGTGGAGTGATTTGT | 1266 |
| Query | 1262 | CTGCTTAATTGCGATAACGAACGAGACCTTAACCTACTAAATAGTGCTGCTAGCTTTTGC | 1321 |
|       |      |                                                              |      |
| Sbjct | 1267 | CTGCTTAATTGCGATAACGAACGAGACCTTAACCTACTAAATAGTGCTGCTAGCTTTTGC | 1326 |
| Query | 1322 | TGGTATAGTCACTTCTTAGAGGGACTATCGATTTCAAGTCGATGGAAGTTTGAGGCAATA | 1381 |
|       |      |                                                              |      |
| Sbjct | 1327 | TGGTATAGTCACTTCTTAGAGGGACTATCGATTTCAAGTCGATGGAAGTTTGAGGCAATA | 1386 |
| Query | 1382 | ACAGGTCTGTGATGCCCTTAGACGTTCTGGGCCGCACGCGCGCTACACTGACGGAGCCAA | 1441 |
|       |      |                                                              |      |
| Sbjct | 1387 | ACAGGTCTGTGATGCCCTTAGACGTTCTGGGCCGCACGCGCGCTACACTGACGGAGCCAG | 1446 |
| Query | 1442 | CGAGTAT-TAACCTTGGCCGAGAGGTCTGGGAAATCTTGTGAAACTCCGTCGTGCTGGGG | 1500 |
|       |      |                                                              |      |
| Sbjct | 1447 | CGAGT-TCTAACCTTGGCCGAGAGGTCTGGGTAATCTTGTGAAACTCCGTCGTGCTGGGG | 1505 |
| Query | 1501 | ATAGAGCATTGTAATTATTGCTCTTCAACGAGGAATTCCTAGTAAGCGCAAGTCATCAGC | 1560 |
|       |      |                                                              |      |
| Sbjct | 1506 | ATAGAGCATTGTAATTATTGCTCTTCAACGAGGAATTCCTAGTAAGCGCAAGTCATCAGC | 1565 |
| Query | 1561 | TTGCGTTGATTACGTCCCTGCCCTTTGTACACACCGCCCGTCGCTACTACCGATTGAATG | 1620 |
|       |      |                                                              |      |
| Sbjct | 1566 | TTGCGTTGATTACGTCCCTGCCCTTTGTACACACCGCCCGTCGCTACTACCGATTGAATG | 1625 |
| Query | 1621 | GCTTAGTGAGGCCTCCGGATTGGTTTAAAGAAGGGGGCAACTCCATCTTGAACCGAAAA  | 1680 |
|       |      |                                                              |      |
| Sbjct | 1626 | GCTTAGTGAGGCCTCCGGATTGGTTTAAAGAAGGGGGCAACTCCATCTTGAACCGAAAA  | 1685 |
| Query | 1681 | GCTGGTCAAACCTGGTCATTTAGAGGAAGTAAAAGTCGTAACAAGGTTTCCGTA       | 1734 |
|       |      |                                                              |      |
| Sbjct | 1686 | GCTAGTCAAACCTGGTCATTTAGAGGAAGTAAAAGTCGTAACAAGGTTTCCGTA       | 1739 |

>gb|AY520264.1| *Candida* sp. BG02-7-18-022A-1-1 18S ribosomal RNA gene, partial sequence  
Length=1739

Score = 3109 bits (1683), Expect = 0.0  
Identities = 1719/1735 (99%), Gaps = 8/1735 (0%)  
Strand=Plus/Plus

|       |     |                                                              |     |
|-------|-----|--------------------------------------------------------------|-----|
| Query | 3   | GCCATGCATGTCTAAGTATAAGCAATTTATACAGTGAAACTGCGAATGGCTCATTAAATC | 62  |
|       |     |                                                              |     |
| Sbjct | 10  | GCCATGCATGTCTAAGTATAAGCAATTTATACAGTGAAACTGCGAATGGCTCATTAAATC | 69  |
| Query | 63  | AGTTATCGTTTATTTGATAGTACCTTTACTACTTGGATAACCGTGGTAATTCTAGAGCTA | 122 |
|       |     |                                                              |     |
| Sbjct | 70  | AGTTATCGTTTATTTGATAGTACCTTTACTACTTGGATAGCCGTGGTAATTCTAGAGCTA | 129 |
| Query | 123 | ATACATGCTAAAAATCCCGACTGTTTGAAGGGATGTATTTATTAGATAAAAAATCAATG  | 182 |
|       |     |                                                              |     |
| Sbjct | 130 | ATACATGCTAAAAATCCCGACT-TCTGGAAGGGATGTATTTATTAGATAAAAAATCAATG | 188 |



```

Query 1142 TTGACTCAACACGGGGAAACTCACCAGGTCCAGACACAATAAGGATTGACAGATTGAGAG 1201
          |||
Sbjct 1147 TTGACTCAACACGGGGAAACTCACCAGGTCCAGACACAATAAGGATTGACAGATTGAGAG 1206

Query 1202 CTCTTTCTTGATTTTGTGGGTGGTGGTGCATGGCCGTTCTTAGTTGGTGGAGTGATTTGT 1261
          |||
Sbjct 1207 CTCTTTCTTGATTTTGTGGGTGGTGGTGCATGGCCGTTCTTAGTTGGTGGAGTGATTTGT 1266

Query 1262 CTGCTTAATTGCGATAACGAACGAGACCTTAACCTACTAAATAGTGCTG-CTAGCTTTTG 1320
          |||
Sbjct 1267 CTGCTTAATTGCGATAACGAACGAGACCTTAACCTACTAAATAGTGC-GACTAGCTTTTG 1325

Query 1321 CTGGTATAGTCACTTCTTAGAGGGACTATCGATTTCAAGTCGATGGAAGTTTGAGGCAAT 1380
          |||
Sbjct 1326 CTGGTATAGTCACTTCTTAGAGGGACTATCGATTTCAAGTCGATGGAAGTTTGAGGCAAT 1385

Query 1381 AACAGGTCTGTGATGCCCTTAGACGTTCTGGGCCGCACGCGCGCTACACTGACGGAGCCA 1440
          |||
Sbjct 1386 AACAGGTCTGTGATGCCCTTAGACGTTCTGGGCCGCACGCGCGCTACACTGACGGAGCCA 1445

Query 1441 ACGAGTAT-TAACCTTGCCGAGAGGTCTGGGAAATCTTGTGAAACTCCGTCGTGCTGGG 1499
          |||
Sbjct 1446 GCGAGT-TCTAACCTTGCCGAGAGGTCTGGGTAATCTTGTGAAACTCCGTCGTGCTGGG 1504

Query 1500 GATAGAGCATTGTAATTATTGCTCTTCAACGAGGAATTCCTAGTAAGCGCAAGTCATCAG 1559
          |||
Sbjct 1505 GATAGAGCATTGTAATTATTGCTCTTCAACGAGGAATTCCTAGTAAGCGCAAGTCATCAG 1564

Query 1560 CTTGCGTTGATTACGTCCCTGCCCTTTGTACACACCGCCCGTCGCTACTACCGATTGAAT 1619
          |||
Sbjct 1565 CTTGCGTTGATTACGTCCCTGCCCTTTGTACACACCGCCCGTCGCTACTACCGATTGAAT 1624

Query 1620 GGCTTAGTGAGGCCTCCGGATTGGTTTTAAAGAAGGGGGCAACTCCATCTTGGAACCGAAA 1679
          |||
Sbjct 1625 GGCTTAGTGAGGCCTCCGGATTGGTTTTAAAGAAGGGGGCAACTCCATCTTGGAACCGAAA 1684

Query 1680 AGCTGGTCAAACCTGGTCAATTTAGAGGAAGTAAAAGTCGTAACAAGGTTTCCGTA 1734
          |||
Sbjct 1685 AGCTAGTCAAACCTGGTCAATTTAGAGGAAGTAAAAGTCGTAACAAGGTTTCCGTA 1739

```

>gb|EF532297.1| Pichia guilliermondii strain gaolzhong2 18S ribosomal RNA gene, partial sequence  
Length=1714

Score = 3107 bits (1682), Expect = 0.0  
Identities = 1705/1715 (99%), Gaps = 5/1715 (0%)  
Strand=Plus/Plus

```

Query 3 GCCATGCATGTCTAAGTATAAGCAATTTATACAGTGAAACTGCGAATGGCTCATTAAATC 62
          |||
Sbjct 3 GCCATGCATGTCTAAGTATAAGCAATTTATACAGTGAAACTGCGAATGGCTCATTAAATC 62

Query 63 AGTTATCGTTTATTTGATAGTACCTTTACTACTTGGATAACCGTGGTAATTCTAGAGCTA 122
          |||
Sbjct 63 AGTTATCGTTTATTTGATAGTACCTTTACTACTTGGATAACCGTGGTAATTCTAGAGCTA 122

Query 123 ATACATGCTAAAAATCCCGACTGTTTGAAGGGATGTATTTATTAGATAAAAAATCAATG 182
          |||
Sbjct 123 ATACATGCTAAAAATCCCGACTGTTTGAAGGGATGTATTTATTAGATAAAAAATCAATG 182

Query 183 CT-TTTCGGAGCTCTTTGATGATTCATAATAACTTTTCGAATCGCATGGCCTTGTGCTGG 241
          |||

```

|       |      |                                                                   |      |
|-------|------|-------------------------------------------------------------------|------|
| Sbjct | 183  | CTCTTT--GAGCTCTTTGATGATTCATAATAACTTTTCGAATCGCATGGCCTTGTGCTGG      | 240  |
| Query | 242  | CGATGGTTCATTCAAATTTCTGCCCTATCAACTTTTCGATGGTAGGATAGTGGCCTACCAT     | 301  |
| Sbjct | 241  | <br>CGATGGTTCATTCAAATTTCTGCCCTATCAACTTTTCGATGGTAGGATAGTGGCCTACCAT | 300  |
| Query | 302  | GGTTTCAACGGGTAACGGGGAATAAGGGTTCGATTCCGGAGAGGGAGCCTGAGAAACGGC      | 361  |
| Sbjct | 301  | <br>GGTTTCAACGGGTAACGGGGAATAAGGGTTCGATTCCGGAGAGGGAGCCTGAGAAACGGC  | 360  |
| Query | 362  | TACCACATCCAAGGAAGGCAGCAGGCGCGCAAATTACCCAATCCCGACACGGGGAGGTAG      | 421  |
| Sbjct | 361  | <br>TACCACATCCAAGGAAGGCAGCAGGCGCGCAAATTACCCAATCCCGACACGGGGAGGTAG  | 420  |
| Query | 422  | TGACAATAAATAACGATACAGGGCCCTTTCGGGTCTTGTAAATTGGAATGAGTACAATGTA     | 481  |
| Sbjct | 421  | <br>TGACAATAAATAACGATACAGGGCCCTTTCGGGTCTTGTAAATTGGAATGAGTACAATGTA | 480  |
| Query | 482  | AATACCTTAACGAGGAACAATTGGAGGGCAAGTCTGGTGCCAGCAGCCGCGGTAATTCCA      | 541  |
| Sbjct | 481  | <br>AATACCTTAACGAGGAACAATTGGAGGGCAAGTCTGGTGCCAGCAGCCGCGGTAATTCCA  | 540  |
| Query | 542  | GCTCCAATAGCGTATATTAAGTTGTTGCAGTTAAAAAGCTCGTAGTTGAACCTTGGGCT       | 601  |
| Sbjct | 541  | <br>GCTCCAATAGCGTATATTAAGTTGTTGCAGTTAAAAAGCTCGTAGTTGAACCTTGGGCT   | 600  |
| Query | 602  | TGGTTGGCCGGTCCGCCTTTTTGGCGAGTACTGGACCCAACCGAGCCTTTCCTTCTGGCT      | 661  |
| Sbjct | 601  | <br>TGGTTGGCCGGTCCGCCTTTTTGGCGAGTACTGGACCCAACCGAGCCTTTCCTTCTGGCT  | 660  |
| Query | 662  | AACCTTTCGCCCTTGTGGTGTGGCGAACCAGGACTTTTACTTTGAAAAAATTAGAGTG        | 721  |
| Sbjct | 661  | <br>AACCATTCGCCCTTGTGGTGTGGCGAACCAGGACTTTTACTTTGAAAAAATTAGAGTG    | 720  |
| Query | 722  | TTCAAAGCAGGCCTTTGCTCGAATATATTAGCATGGAATAATAGAATAGGACGTTATGGT      | 781  |
| Sbjct | 721  | <br>TTCAAAGCAGGCCTTTGCTCGAATATATTAGCATGGAATAATAGAATAGGACGTTATGGT  | 780  |
| Query | 782  | TCTATTTTGTGGTTTCTAGGACCATCGTAATGATTAATAGGGACGGTCGGGGGCATCAG       | 841  |
| Sbjct | 781  | <br>TCTATTTTGTGGTTTCTAGGACCATCGTAATGATTAATAGGGACGGTCGGGGGCATCAG   | 840  |
| Query | 842  | TATTCAGTTGTCAGAGGTGAAATTCTTGGA--TTACCTGAAGACTAACTACTGCGAAAGCA     | 900  |
| Sbjct | 841  | <br>TATTCAGTTGTCAGAGGTGAAATTCTTAGATTTA-CTGAAGACTAACTACTGCGAAAGCA  | 899  |
| Query | 901  | TTTGCCAAGGACGTTTTTCATTAATCAAGAACGAAAGTTAGGGGATCGAAGATGATCAGAT     | 960  |
| Sbjct | 900  | <br>TTTGCCAAGGACGTTTTTCATTAATCAAGAACGAAAGTTAGGGGATCGAAGATGATCAGAT | 959  |
| Query | 961  | ACCGTCGTAGTCTTAACCATAAACTATGCCGACTAGGGATCGGGTGTGTTCTtttttttG      | 1020 |
| Sbjct | 960  | <br>ACCGTCGTAGTCTTAACCATAAACTATGCCGACTAGGGATCGGGTGTGTTCTTTTTTTTG  | 1019 |
| Query | 1021 | ACGCACTCGGCACCTTACGAGAAATCAAAGTCTTTGGGTTCTGGGGGAGTATGGTCGCA       | 1080 |
| Sbjct | 1020 | <br>ACGCACTCGGCACCTTACGAGAAATCAAAGTCTTTGGGTTCTGGGGGAGTATGGTCGCA   | 1079 |
| Query | 1081 | AGGCTGAAACTTAAAGGAATTGACGGAAGGGCACCACCAGGAGTGGAGCCTGCGGCTTAA      | 1140 |
| Sbjct | 1080 | <br>AGGCTGAAACTTAAAGGAATTGACGGAAGGGCACCACCAGGAGTGGAGCCTGCGGCTTAA  | 1139 |
| Query | 1141 | TTTGACTCAACACGGGAAACTCACCAGTCCAGACACAATAAGGATTGACAGATTGAGA        | 1200 |
|       |      |                                                                   |      |

|       |      |                                                              |      |
|-------|------|--------------------------------------------------------------|------|
| Sbjct | 1140 | TTTGACTCAACACGGGGAAACTCACCAGGTCCAGACACAATAAGGATTGACAGATTGAGA | 1199 |
| Query | 1201 | GCTCTTTCTTGATTTTGTGGGTGGTGGTGCATGGCCGTTCTTAGTTGGTGGAGTGATTTG | 1260 |
| Sbjct | 1200 | GCTCTTTCTTGATTTTGTGGGTGGTGGTGCATGGCCGTTCTTAGTTGGTGGAGTGATTTG | 1259 |
| Query | 1261 | TCTGCTTAATTGCGATAACGAACGAGACCTTAACCTACTAAATAGTGCTGCTAGCTTTTG | 1320 |
| Sbjct | 1260 | TCTGCTTAATTGCGATAACGAACGAGACCTTAACCTACTAAATAGTGCTGCTAGCTTTTG | 1319 |
| Query | 1321 | CTGGTATAGTCACTTCTTAGAGGGACTATCGATTTCAAGTCGATGGAAGTTTGAGGCAAT | 1380 |
| Sbjct | 1320 | CTGGTATAGTCACTTCTTAGAGGGACTATCGATTTCAAGTCGATGGAAGTTTGAGGCAAT | 1379 |
| Query | 1381 | AACAGGTCTGTGATGCCCTTAGACGTTCTGGGCCGCACGCGCGCTACACTGACGGAGCCA | 1440 |
| Sbjct | 1380 | AACAGGTCTGTGATGCCCTTAGACGTTCTGGGCCGCACGCGCGCTACACTGACGGAGCCA | 1439 |
| Query | 1441 | ACGAGTATTAACCTTGGCCGAGAGGTCTGGGAAATCTTGTGAAACTCCGTCGTGCTGGGG | 1500 |
| Sbjct | 1440 | GCGAGTATTAACCTTGGCCGAGAGGTCTGGGAAATCTTGTGAAACTCCGTCGTGCTGGGG | 1499 |
| Query | 1501 | ATAGAGCATTGTAATTATTGCTCTTCAACGAGGAATTCCTAGTAAGCGCAAGTCATCAGC | 1560 |
| Sbjct | 1500 | ATAGAGCATTGTAATTATTGCTCTTCAACGAGGAATTCCTAGTAAGCGCAAGTCATCAGC | 1559 |
| Query | 1561 | TTGCGTTGATTACGTCCCTGCCCTTTGTACACACCGCCCGTCGCTACTACCGATTGAATG | 1620 |
| Sbjct | 1560 | TTGCGTTGATTACGTCCCTGCCCTTTGTACACACCGCCCGTCGCTACTACCGATTGAATG | 1619 |
| Query | 1621 | GCTTAGTGAGGCCTCCGGATTGGTTTAAAGAAGGGGGCAACTCCATCTTGAACCGAAAA  | 1680 |
| Sbjct | 1620 | GCTTAGTGAGGCCTCCGGATTGGTTTAAAGAAGGGGGCAACTCCATCTTGAACCGAAAA  | 1679 |
| Query | 1681 | GCTGGTCAAACCTTGGTCATTTAGAGGAAGTAAAAG                         | 1715 |
| Sbjct | 1680 | GCTGGTCAAACCTTGGTCATTTAGAGGAAGTAAAAG                         | 1714 |

>gb|EF061756.1| *Debaryomyces hansenii* strain G7a1 18S ribosomal RNA gene, partial sequence  
Length=1682

Score = 3107 bits (1682), Expect = 0.0  
Identities = 1682/1682 (100%), Gaps = 0/1682 (0%)  
Strand=Plus/Plus

|       |     |                                                               |     |
|-------|-----|---------------------------------------------------------------|-----|
| Query | 25  | CAATTTATACAGTGAAACTGCGAATGGCTCATTAATCAGTTATCGTTTATTTGATAGTA   | 84  |
| Sbjct | 1   | CAATTTATACAGTGAAACTGCGAATGGCTCATTAATCAGTTATCGTTTATTTGATAGTA   | 60  |
| Query | 85  | CCTTTACTACTTGGATAACCGTGGTAATTCTAGAGCTAATAACATGCTAAAAATCCCGACT | 144 |
| Sbjct | 61  | CCTTTACTACTTGGATAACCGTGGTAATTCTAGAGCTAATAACATGCTAAAAATCCCGACT | 120 |
| Query | 145 | GTTTGAAGGGATGTATTTATTAGATAAAAAATCAATGCTTTTCGGAGCTCTTTGATGAT   | 204 |
| Sbjct | 121 | GTTTGAAGGGATGTATTTATTAGATAAAAAATCAATGCTTTTCGGAGCTCTTTGATGAT   | 180 |
| Query | 205 | TCATAATAACTTTTCGAATCGCATGGCCTTGTGCTGGCGATGGTTCATTCAAATTTCTGC  | 264 |
| Sbjct | 181 | TCATAATAACTTTTCGAATCGCATGGCCTTGTGCTGGCGATGGTTCATTCAAATTTCTGC  | 240 |
| Query | 265 | CCTATCAAACCTTCGATGGTAGGATAGTGGCCTACCATGGTTTCAACGGGTAACGGGGAAT | 324 |

|       |      |                                                                   |      |
|-------|------|-------------------------------------------------------------------|------|
| Sbjct | 241  | <br>CCTATCAACTTTCGATGGTAGGATAGTGGCCTACCATGGTTTCAACGGGTAACGGGGAAT  | 300  |
| Query | 325  | AAGGGTTCGATTCCGGAGAGGGAGCCTGAGAAACGGCTACCACATCCAAGGAAGGCAGCA      | 384  |
| Sbjct | 301  | <br>AAGGGTTCGATTCCGGAGAGGGAGCCTGAGAAACGGCTACCACATCCAAGGAAGGCAGCA  | 360  |
| Query | 385  | GGCGCGCAAATTACCCAATCCCGACACGGGGAGGTAGTGACAATAAATAACGATACAGGG      | 444  |
| Sbjct | 361  | <br>GGCGCGCAAATTACCCAATCCCGACACGGGGAGGTAGTGACAATAAATAACGATACAGGG  | 420  |
| Query | 445  | CCCTTTCGGGTCTTGTAATTGGAATGAGTACAATGTAAATACCTTAACGAGGAACAATTG      | 504  |
| Sbjct | 421  | <br>CCCTTTCGGGTCTTGTAATTGGAATGAGTACAATGTAAATACCTTAACGAGGAACAATTG  | 480  |
| Query | 505  | GAGGGCAAGTCTGGTGCCAGCAGCCGCGTAATTCAGCTCCAATAGCGTATATTAAAGT        | 564  |
| Sbjct | 481  | <br>GAGGGCAAGTCTGGTGCCAGCAGCCGCGTAATTCAGCTCCAATAGCGTATATTAAAGT    | 540  |
| Query | 565  | TGTTGCAGTTAAAAAGCTCGTAGTTGAACCTTGGGCTTGGTTGGCCGGTCCGCCTTTTTG      | 624  |
| Sbjct | 541  | <br>TGTTGCAGTTAAAAAGCTCGTAGTTGAACCTTGGGCTTGGTTGGCCGGTCCGCCTTTTTG  | 600  |
| Query | 625  | GCGAGTACTGGACCCAACCGAGCCTTTCCTTCTGGCTAACCTTTCGCCCTTGTGGTGT        | 684  |
| Sbjct | 601  | <br>GCGAGTACTGGACCCAACCGAGCCTTTCCTTCTGGCTAACCTTTCGCCCTTGTGGTGT    | 660  |
| Query | 685  | GGCGAACCAGGACTTTTACTTTGAAAAAATTAGAGTGTTCAAAGCAGGCCTTGTCTCGAA      | 744  |
| Sbjct | 661  | <br>GGCGAACCAGGACTTTTACTTTGAAAAAATTAGAGTGTTCAAAGCAGGCCTTGTCTCGAA  | 720  |
| Query | 745  | TATATTAGCATGGAATAATAGAATAGGACGTTATGGTTCTATTTTGTGGTTTCTAGGAC       | 804  |
| Sbjct | 721  | <br>TATATTAGCATGGAATAATAGAATAGGACGTTATGGTTCTATTTTGTGGTTTCTAGGAC   | 780  |
| Query | 805  | CATCGTAATGATTAATAGGGACGGTTCGGGGGCATCAGTATTCAGTTGTCAGAGGTGAAAT     | 864  |
| Sbjct | 781  | <br>CATCGTAATGATTAATAGGGACGGTTCGGGGGCATCAGTATTCAGTTGTCAGAGGTGAAAT | 840  |
| Query | 865  | TCTTGGATTACCTGAAGACTAACTACTGCGAAAGCATTGCAAGGACGTTTTTCATTAAT       | 924  |
| Sbjct | 841  | <br>TCTTGGATTACCTGAAGACTAACTACTGCGAAAGCATTGCAAGGACGTTTTTCATTAAT   | 900  |
| Query | 925  | CAAGAACGAAAGTTAGGGGATCGAAGATGATCAGATACCGTCGTAGTCTTAACCATAAAC      | 984  |
| Sbjct | 901  | <br>CAAGAACGAAAGTTAGGGGATCGAAGATGATCAGATACCGTCGTAGTCTTAACCATAAAC  | 960  |
| Query | 985  | TATGCCGACTAGGGATCGGGTGTGTTCTtttttttGACGCACTCGGCACCTTACGAGAAA      | 1044 |
| Sbjct | 961  | <br>TATGCCGACTAGGGATCGGGTGTGTTCTTTTTTTGACGCACTCGGCACCTTACGAGAAA   | 1020 |
| Query | 1045 | TCAAAGTCTTTGGGTTCTGGGGGAGTATGGTCGCAAGGCTGAAACTTAAAGGAATTGAC       | 1104 |
| Sbjct | 1021 | <br>TCAAAGTCTTTGGGTTCTGGGGGAGTATGGTCGCAAGGCTGAAACTTAAAGGAATTGAC   | 1080 |
| Query | 1105 | GGAAGGGCACCACCAGGAGTGGAGCCTGCGGCTTAATTTGACTCAACACGGGGAAACTCA      | 1164 |
| Sbjct | 1081 | <br>GGAAGGGCACCACCAGGAGTGGAGCCTGCGGCTTAATTTGACTCAACACGGGGAAACTCA  | 1140 |
| Query | 1165 | CCAGGTCCAGACACAATAAGGATTGACAGATTGAGAGCTCTTCTTGATTTTGTGGGTGG       | 1224 |
| Sbjct | 1141 | <br>CCAGGTCCAGACACAATAAGGATTGACAGATTGAGAGCTCTTCTTGATTTTGTGGGTGG   | 1200 |
| Query | 1225 | TGGTGCATGGCCGTTCTTAGTTGGTGGAGTGATTTGTCTGCTTAATTGCGATAACGAACG      | 1284 |



|       |      |                                                                   |      |
|-------|------|-------------------------------------------------------------------|------|
| Sbjct | 1201 | <br>TGGTGCATGGCCGTTCTTAGTTGGTGGAGTGATTTGTCTGCTTAATTGCGATAACGAACG  | 1260 |
| Query | 1285 | AGACCTTAACCTACTAAATAGTGCTGCTAGCTTTTGGCTGGTATAGTCACTTCTTAGAGGG     | 1344 |
| Sbjct | 1261 | <br>AGACCTTAACCTACTAAATAGTGCTGCTAGCTTTTGGCTGGTATAGTCACTTCTTAGAGGG | 1320 |
| Query | 1345 | ACTATCGATTTCAAGTCGATGGAAGTTTGAGGCAATAACAGGTCTGTGATGCCCTTAGAC      | 1404 |
| Sbjct | 1321 | <br>ACTATCGATTTCAAGTCGATGGAAGTTTGAGGCAATAACAGGTCTGTGATGCCCTTAGAC  | 1380 |
| Query | 1405 | GTTCTGGGCCGACGCGCGCTACACTGACGGAGCCAACGAGTATTAACCTTGGCCGAGAG       | 1464 |
| Sbjct | 1381 | <br>GTTCTGGGCCGACGCGCGCTACACTGACGGAGCCAACGAGTATTAACCTTGGCCGAGAG   | 1440 |
| Query | 1465 | GTCTGGGAAATCTTGTGAAACTCCGTCGTGCTGGGGATAGAGCATTGTAATTATTGCTCT      | 1524 |
| Sbjct | 1441 | <br>GTCTGGGAAATCTTGTGAAACTCCGTCGTGCTGGGGATAGAGCATTGTAATTATTGCTCT  | 1500 |
| Query | 1525 | TCAACGAGGAATTCCTAGTAAGCGCAAGTCATCAGCTTGCGTTGATTACGTCCCTGCCCT      | 1584 |
| Sbjct | 1501 | <br>TCAACGAGGAATTCCTAGTAAGCGCAAGTCATCAGCTTGCGTTGATTACGTCCCTGCCCT  | 1560 |
| Query | 1585 | TTGTACACACCGCCGTCGCTACTACCGATTGAATGGCTTAGTGAGGCCTCCGGATTGGT       | 1644 |
| Sbjct | 1561 | <br>TTGTACACACCGCCGTCGCTACTACCGATTGAATGGCTTAGTGAGGCCTCCGGATTGGT   | 1620 |
| Query | 1645 | TTAAAGAAGGGGGCAACTCCATCTTGAACCGAAAAGCTGGTCAAACCTTGGTCATTTAGA      | 1704 |
| Sbjct | 1621 | <br>TTAAAGAAGGGGGCAACTCCATCTTGAACCGAAAAGCTGGTCAAACCTTGGTCATTTAGA  | 1680 |
| Query | 1705 | GG 1706                                                           |      |
| Sbjct | 1681 | <br>GG 1682                                                       |      |

>gb|DQ534403.1| *Pichia guilliermondii* strain JHsd 18S ribosomal RNA gene, partial sequence  
Length=1738

Score = 3105 bits (1681), Expect = 0.0  
Identities = 1711/1724 (99%), Gaps = 7/1724 (0%)  
Strand=Plus/Plus

|       |     |                                                                   |     |
|-------|-----|-------------------------------------------------------------------|-----|
| Query | 3   | GCCATGCATGTCTAAGTATAAGCAATTTATACAGTGAAACTGCGAATGGCTCATTAAATC      | 62  |
| Sbjct | 17  | <br>GCC-TGCATGTCTAAGTATAAGCAATTTATACAGTGAAACTGCGAATGGCTCATTAAATC  | 75  |
| Query | 63  | AGTTATCGTTTATTTGATAGTACCTTTACTACTTGGATAACCGTGGTAATTCTAGAGCTA      | 122 |
| Sbjct | 76  | <br>AGTTATCGTTTATTTGATAGTACCTTTACTACTTGGATAACCGTGGTAATTCTAGAGCTA  | 135 |
| Query | 123 | ATACATGCTAAAAATCCCGACTGTTTGAAGGGATGTATTTATTAGATAAAAAATCAATG       | 182 |
| Sbjct | 136 | <br>ATACATGCTAAAAATCCCGACTGTTTGAAGGGATGTATTTATTAGATAAAAAATCAATG   | 195 |
| Query | 183 | CT-TTTCGGAGCTCTTTGATGATTCATAATAACTTTTTCGAATCGCATGGCCTTGTGCTGG     | 241 |
| Sbjct | 196 | <br>CTCTTT--GAGCTCTTTGATGATTCATAATAACTTTTTCGAATCGCATGGCCTTGTGCTGG | 253 |
| Query | 242 | CGATGGTTCATTCAAATTTCTGCCCTATCAACTTTCGATGGTAGGATAGTGGCCTACCAT      | 301 |
| Sbjct | 254 | <br>CGATGGTTCATTCAAATTTCTGCCCTATCAACTTTCGATGGTAGGATAGTGGCCTACCAT  | 313 |



```

Query 1261 TCTGCTTAATTGCGATAACGAACGAGACCTTAACCTACTAAATAGTGCTGCTAGCTTTTG 1320
          |||
Sbjct 1273 TCTGCTTAATTGCGATAACGAACGAGACCTTAACCTACTAAATAGTGCTGCTAGCTTTTG 1332

Query 1321 CTGGTATAGTCACTTCTTAGAGGGACTATCGATTTCAAGTCGATGGAAGTTTGAGGCAAT 1380
          |||
Sbjct 1333 CTGGTATAGTCACTTCTTAGAGGGACTATCGATTTCAAGTCGATGGAAGTTTGAGGCAAT 1392

Query 1381 AACAGGTCTGTGATGCCCTTAGACGTTCTGGGCCGCACGCGCGCTACACTGACGGAGCCA 1440
          |||
Sbjct 1393 AACAGGTCTGTGATGCCCTTAGACGTTCTGGGCCGCACGCGCGCTACACTGACGGAGCCA 1452

Query 1441 ACGAGTATTAACCTTGGCCGAGAGGTCTGGGAAATCTTGTGAAACTCCGTCGTGCTGGGG 1500
          |||
Sbjct 1453 GCGAGTATTAACCTTGGCCGAGAGGTCTGGGAAATCTTGTGAAACTCCGTCGTGCTGGGG 1512

Query 1501 ATAGAGCATTGTAATTATTGCTCTTCAACGAGGAATTCCTAGTAAGCGCAAGTCATCAGC 1560
          |||
Sbjct 1513 ATAGAGCATTGTAATTATTGCTCTTCAACGAGGAATTCCTAGTAAGCGCAAGTCATCAGC 1572

Query 1561 TTGCGTTGATTACGTCCCTGCCCTTTGTACACACCGCCCGTCGCTACTACCGATTGAATG 1620
          |||
Sbjct 1573 TTGCGTTGATTACGTCCCTGCCCTTTGTACACACCGCCCGTCGCTACTACCGATTGAATG 1632

Query 1621 GCTTAGTGAGGCCTCCGGATTGGTTTAAAGAAGGGGGCAACTCCATCTTGAACCGAAAA 1680
          |||
Sbjct 1633 GCTTAGTGAGGCCTCCGGATTGGTTTAAAGAAGGGGGCAACTCCATCTTGAACCGAAAA 1692

Query 1681 GCTGGTCAAACCTTGGTCATTTAGAGGAAGTAAAAGTCGTAACAA 1724
          |||
Sbjct 1693 GCTGGTCAAACCTTGGTCATT-AGAGGAAGTAAAAGTCGTAGCAA 1735

```

```

>dbj|AB054282.1| Pichia guilliermondii gene for 18S rRNA, partial sequence,
strain:JCM
10735
Length=1752

```

```

Score = 3105 bits (1681), Expect = 0.0
Identities = 1718/1736 (98%), Gaps = 7/1736 (0%)
Strand=Plus/Plus

```

```

Query 3 GCCATGCATGTCTAAGTATAAGCAATTTATACAGTGAAACTGCGAATGGCTCATTAAATC 62
          |||
Sbjct 21 GCCATGCATGTCTAAGTATAAGCAATTTATACAGTGAAACTGCGAATGGCTCATTAAATC 80

Query 63 AGTTATCGTTTATTTGATAGTACCTTTACTACTTGG-ATAACCGTGGTAATTCTAGAGCT 121
          |||
Sbjct 81 AGTTATCGTTTATTTGATAGTACCTTTACTACTTGGTATAACCGTGGTAATTCTAGAGCT 140

Query 122 AATACATGCTAAAAATCCCGACTGTTTGAAGGGATGTATTTATTAGATAAAAAATCAAT 181
          |||
Sbjct 141 AATACATGCTAAAAATCCCGACTGTTTGAAGGGATGTATTTATTAGATAAAAAATCAAT 200

Query 182 GCT-TTTCGGAGCTCTTTGATGATTCATAATAACTTTTCGAATCGCATGGCCTTGTGCTG 240
          |||
Sbjct 201 GCTCTTT--GAGCTCTTTGATGATTCATAATAACTTTTCGAATCGCATGGCCTTGTGCTG 258

Query 241 GCGATGGTTCATTCAAATTTCTGCCCTATCAACTTTTCGATGGTAGGATAGTGGCCTACCA 300
          |||
Sbjct 259 GCGATGGTTCATTCAAATTTCTGCCCTATCAACTTTTCGATGGTAGGATAGTGGCCTACCA 318

Query 301 TGGTTTCAACGGGTAACGGGAATAAGGGTTCGATTCCGGAGAGGGAGCCTGAGAAACGG 360
          |||

```

|       |      |                                                                |      |
|-------|------|----------------------------------------------------------------|------|
| Sbjct | 319  | TGGTTTCAACGGGTAACGGGGAATAAGGGTTCGATTCCGGAGAGGGAGCCTGAGAAACGG   | 378  |
| Query | 361  | CTACCACATCCAAGGAAGGCAGCAGGCGCGCAAATTACCCAATCCCGACACGGGGAGGTA   | 420  |
| Sbjct | 379  | CTACCACATCCAAGGAAGGCAGCAGGCGCGCAAATTACCCAATCCCGACACGGGGAGGTA   | 438  |
| Query | 421  | GTGACAATAAATAACGATACAGGGCCCTTTCGGGTCTTGTAATTGGAATGAGTACAATGT   | 480  |
| Sbjct | 439  | GTGACAATACATAACGATACAGGGCCCTTTCGGGTCTTGTAATTGGAATGAGTACAATGT   | 498  |
| Query | 481  | AAATACCTTAACGAGGAACAATTGGAGGGCAAGTCTGGTGCCAGCAGCCGCGGTAATTCC   | 540  |
| Sbjct | 499  | AAATACCTTAACGAGGAACAATTGGAGGGCAAGTCTGGTGCCAGCAGCCGCGGTAATTCC   | 558  |
| Query | 541  | AGCTCCAATAGCGTATATTAAGTTGTTGCAGTTAAAAAGCTCGTAGTTGAACCTTGGGC    | 600  |
| Sbjct | 559  | AGCTCCAATAGCGTATATTAAGTTGTTGCAGTTAAAAAGCTCGTAGTTGAACCTTGGGC    | 618  |
| Query | 601  | TTGGTTGGCCGTCGCGCTTTTTGGCGAGTACTGGACCCAACCGAGCCTTTCCTTCTGGC    | 660  |
| Sbjct | 619  | TTGGTTGGCCGTCGCGCTTTTTGGCGAGTACTGGACCCAACCGAGCCTTTCCTTCTGGC    | 678  |
| Query | 661  | TAACCTTTCGCCCTTGTGGTGTGGCGAACCAGGACTTTTACTTTGAAAAATTAGAGT      | 720  |
| Sbjct | 679  | TAACCATTCGTCCTTGTGGTGTGGCGAACCAGGACTTTTACTTTGAAAAATTAGAGT      | 738  |
| Query | 721  | GTTCAAAGCAGGCCTTTGCTCGAATATATTAGCATGGAATAATAGAATAGGACGTTATGG   | 780  |
| Sbjct | 739  | GTTCAAAGCAGGCCTTTGCTCGAATATATTAGCATGGAATAATAGAATAGGACGTTATGG   | 798  |
| Query | 781  | TTCTATTTTGTGGTTTCTAGGACCATCGTAATGATTAATAGGGACGGTCGGGGGCATCA    | 840  |
| Sbjct | 799  | TTCTATTTTGTGGTTTCTAGGACCATCGTAATGATTAATAGGGACGGTCGGGGGCATCA    | 858  |
| Query | 841  | GTATTTCAGTTGTCAGAGGTGAAATTCTTGGG- TTACCTGAAGACTAACTACTGCGAAAGC | 899  |
| Sbjct | 859  | GTATTTCAGTTGTCAGAGGTGAAATTCTTAGATTTA-CTGAAGACTAACTACTGCGAAAGC  | 917  |
| Query | 900  | ATTTGCCAAGGACGTTTTTATTAATCAAGAACGAAAGTTAGGGGATCGAAGATGATCAGA   | 959  |
| Sbjct | 918  | ATTTGCCAAGGACGTTTTTATTAATCAAGAACGAAAGTTAGGGGATCGAAGATGATCAGA   | 977  |
| Query | 960  | TACCGTCGTAGTCTTAACCATAAACTATGCCGACTAGGGATCGGGTGTGTTCTttttttt   | 1019 |
| Sbjct | 978  | TACCGTCGTAGTCTTAACCATAAACTATGCCGACTAGGGATCGGGTGTGTTCTTTTTTTT   | 1037 |
| Query | 1020 | GACGCACTCGGCACCTTACGAGAAATCAAAGTCTTTGGGTTCTGGGGGAGTATGGTCGC    | 1079 |
| Sbjct | 1038 | GACGCACTCGGCACCTTACGAGAAATCAAAGTCTTTGGGTTCTGGGGGAGTATGGTCGC    | 1097 |
| Query | 1080 | AAGGCTGAAACTTAAAGGAATTGACGGAAGGGCACCACCAGGAGTGGAGCCTGCGGCTTA   | 1139 |
| Sbjct | 1098 | AAGGCTGAAACTTAAAGGAATTGACGGAAGGGCACCACCAGGAGTGG-GACTGCGGCTTA   | 1156 |
| Query | 1140 | ATTTGACTCAACACGGGGAAACTCACCAGGTCCAGACACAATAAGGATTGACAGATTGAG   | 1199 |
| Sbjct | 1157 | ATTTGACTCAACACGGGGAAACTCACCAGGTCCAGACACAATAAGGATTGACAGATTGAG   | 1216 |
| Query | 1200 | AGCTCTTCTTGATTTTGTGGGTGGTGGTGCATGGCCGTTCTTAGTTGGTGGAGTGATTT    | 1259 |
| Sbjct | 1217 | AGCTCTTCTTGATTTTGTGGGTGGTGGTGCATGGCCGTCCTTAGTTGGTGGAGTGATTT    | 1276 |
| Query | 1260 | GTCTGCTTAATTGCGATAACGAACGAGACCTTAACCTACTAAATAGTGCTGCTAGCTTTT   | 1319 |

|       |      |                                                              |      |
|-------|------|--------------------------------------------------------------|------|
| Sbjct | 1277 | GTCTGCTTAATNNNGATAACGAACGAGACCTTAACCTACTAAATAGTGCTGCTAGCTTTT | 1336 |
| Query | 1320 | GCTGGTATAGTCACTTCTTAGAGGGACTATCGATTTCAAGTCGATGGAAGTTTGAGGCAA | 1379 |
| Sbjct | 1337 | GCTGGTATAGTCACTTCTTAGAGGGACTATCGATTTCAAGTCGATGGAAGTTTGAGGCAA | 1396 |
| Query | 1380 | TAACAGGTCTGTGATGCCCTTAGACGTTCTGGGCCGCACGCGCGCTACACTGACGGAGCC | 1439 |
| Sbjct | 1397 | TAACAGGTCTGTGATGCCCTTAGACGTTCTGGGCCGCACGCGCGCTACACTGACGGAGCC | 1456 |
| Query | 1440 | AACGAGTATTAACCTTGGCCGAGAGGTCTGGGAAATCTTGTGAAACTCCGTCGTGCTGGG | 1499 |
| Sbjct | 1457 | AGCGAGTATTAACCTTGGCCGAGAGGTCTGGGAAATCTTGTGAAACTCCGTCGTGCTGGG | 1516 |
| Query | 1500 | GATAGAGCATTGTAATTATTGCTCTTCAACGAGGAATTCCTAGTAAGCGCAAGTCATCAG | 1559 |
| Sbjct | 1517 | GATAGAGCATTGTAATTATTGCTCTTCAACGAGGAATTCCTAGTAAGCGCAAGTCATCAG | 1576 |
| Query | 1560 | CTTGCGTTGATTACGTCCCTGCCCTTTGTACACACCGCCCGTCGCTACTACCGATTGAAT | 1619 |
| Sbjct | 1577 | CTTGCGTTGATTACGTCCCTGCCCTTTGTACACACCGCCCGTCGCTACTACCGATTGAAT | 1636 |
| Query | 1620 | GGCTTAGTGAGGCCTCCGGATTGGTTTAAAGAAGGGGGCAACTCCATCTTGGAACCGAAA | 1679 |
| Sbjct | 1637 | GGCTTAGTGAGGCCTCCGGATTGGTTTAAAGAAGGGGGCAACTCCATCTTGGAACCGAAA | 1696 |
| Query | 1680 | AGCTGGTCAAACCTTGGTCATTTAGAGGAAGTAAAAGTCGTAACAAGGTTTCCGTAG    | 1735 |
| Sbjct | 1697 | AGCTGGTCAAACCTTGGTCATTTAGAGGAAGTAAAAGTCGTAACAAGGTTTCCGTAG    | 1752 |

>dbj|AB000950.1| Taphrina farlowii gene for 18S rRNA, complete sequence  
Length=1776

Score = 3105 bits (1681), Expect = 0.0  
Identities = 1737/1761 (98%), Gaps = 15/1761 (0%)  
Strand=Plus/Plus

|       |     |                                                               |     |
|-------|-----|---------------------------------------------------------------|-----|
| Query | 3   | GCCATGCATGTCTAAGTATAAGCAATTTATACAGTGAAACTGCGAATGGCTCATTAAATC  | 62  |
| Sbjct | 22  | GCCATGCATGTCTAAGTATAAGCAATTTATACAGTGAAACTGCGAATGGCTCATTAAATC  | 81  |
| Query | 63  | AGTTATCGTTTATTTGATAGTACCTTTACTACTTGGATAACCGTGGTAATTCTAGAGCTA  | 122 |
| Sbjct | 82  | AGTTATCGTTTATTTGATAGTACCTTTACTACTTGGATAACCGTGGTAATTCTAGAGCTA  | 141 |
| Query | 123 | ATACATGCTAAAAATCCCGACTGTTTGAAGGGATGTATTTATTAGATAAAAAATCAATG   | 182 |
| Sbjct | 142 | ATACATGCTAAAAATCCCGACTGTTTGAAGGGATGTATTTATTAGATAAAAAATCAATG   | 201 |
| Query | 183 | CT-TTTCGGAGCTCTTTGATGATTCATAATAACTTTTCGAATCGCATGGCCTTGTGCTGG  | 241 |
| Sbjct | 202 | CTCTTT--GAGCTCTTTGATGATTCATAATAACTTTTAGAATCGCATGGCCTTGTGCTGG  | 259 |
| Query | 242 | CGATGGTTCATTCAAATTTCTGCCCTATCAACTTTCGATGGTAGGATAGTGGCCTACCAT  | 301 |
| Sbjct | 260 | CGATGGTTCATTCAAATTTTCTGCCCTATCAACTTTCGATGGTAGGATAGTGGCCTACCAT | 319 |
| Query | 302 | GGTTTCAACGGGTAACGGGGAATAAGGGTTCGATTCCGGAGAGGGAGCCTGAGAAACGGC  | 361 |
| Sbjct | 320 | GGTTTCAACGGGTAACGGGGAATAAGGGTTCGATTCCGGAGAGGGAGCCTGAGAAACGGC  | 379 |
| Query | 362 | TACCACATCCAAGGAAGGCAGCAGGCGCGCAAATTACCCAATCCCGACACGGGGAGGTAG  | 421 |

|       |      |                                                               |      |
|-------|------|---------------------------------------------------------------|------|
| Sbjct | 380  | TACCACATCCAAGGAAGGCAGCAGGGCGCAAATTACCCAATCCCGACACGGGGAGGTAG   | 439  |
| Query | 422  | TGACAATAAATAACGATACAGGGCCCTTTCGGGTCTTGTAATTGGAATGAGTACAATGTA  | 481  |
| Sbjct | 440  | TGACAATACATAACGATACAGGG-CCTTTCGGGTCTTGTAATTGGAATGAGTACAATGTA  | 498  |
| Query | 482  | AATACCTTAACGAGGAACAATTGGAGGGCAAGTCTGGTGCCAGCAGCCGCGTAATTCCA   | 541  |
| Sbjct | 499  | AATACCTTAACGAGGAACAATTGGAGGGCAAGTCTGGTGCCAGCAGCCGCGTAATTCCA   | 558  |
| Query | 542  | GCTCCAATAGCGTATATTAAGTTGTTGCAGTTAAAAAGCTCGTAGTTGAACCTTGGGCT   | 601  |
| Sbjct | 559  | GCTCCAATAGCGTATATTAAGTTGTTGCAGTTAAAAAGCTCGTAGTTGAACCTTGGGCT   | 618  |
| Query | 602  | TGGTTGGCCGGTCCGCCTTTTTGGCGAGTACTGGACCCAACCGAGCCTTTCCTTCTGGCT  | 661  |
| Sbjct | 619  | TGGTTGGCCGGTCCGCCTTTTTGGCGAGTACTGGACCCAACCGAGCCTTTCCTTCTGGCT  | 678  |
| Query | 662  | AACCTTTCGCCCTTGTGGTGTGGCGAACCAGGACTTTTACTTTGAAAAATTAGAGTG     | 721  |
| Sbjct | 679  | AACCATTCGCCCTTGTGGTGTGGCGAACCAGGACTTTTACTTTGAAAAATTAGAGTG     | 738  |
| Query | 722  | TTCAAAGCAGGCCTTTGCTCGAATA-TATTAGCATGGAATAATAGAATAGGACGTTATGG  | 780  |
| Sbjct | 739  | TTCAAAGCAGGCCTTTGCTCGAATACTATTAGCATGGAATAATAGAATAGGACGTTATGG  | 798  |
| Query | 781  | TTCTATTTTGTGGTTTCTAGGACCATCGTAATGATTAATA-GGGACGGTCGGGGGCATC   | 839  |
| Sbjct | 799  | TTCTATTTTGTGGTTTCTAGGACCATCGTAATGATTAATAGGGACGGTCGGGGGCATC    | 858  |
| Query | 840  | AGTATTCAGTTGTCAGAGGTGAAATTCTTGGA-TTACCTGAAGACTAACTACTGCGAAAG  | 898  |
| Sbjct | 859  | AGTATTCAGTTGTCAGAGGTGAAATTCTTAGATTTA-CTGAAGACTAACTACTGCGAAAG  | 917  |
| Query | 899  | CATTTGCCAAGGACGTTTTTCATTAATCAAGAACGAAAGTTAGGGGATCGAAGATGATCAG | 958  |
| Sbjct | 918  | CATTTGCCAAGGACGTTTTTCATTAATCAAGAACGAAAGTTAGGGGATCGAAGATGATCAG | 977  |
| Query | 959  | ATACCGTCGTAGTCTTAACCATAAACTATGCCGACTAGGGATCGGGTGTGTTCTtttttt  | 1018 |
| Sbjct | 978  | ATACCGTCGTAGTCTTAACCATAAACTATGCCGACTAGGGATCGGGTGTGTTCTTTTTTT  | 1037 |
| Query | 1019 | tGACGCACTCGGCACCTTACGAGAAATCAAAGTCTTTGGGTCTGGGGGAGTATGGTTCG   | 1078 |
| Sbjct | 1038 | TGACGCACTCGGCACCTTACGAGAAATCAAAGTCTTTGGGTCTGGGGGAGTATGGTTCG   | 1097 |
| Query | 1079 | CAAGGCTGAAACTTAAAGGAATTGACGGAAGGGCACCACCAGGAGTGGAGCCTGCGGCTT  | 1138 |
| Sbjct | 1098 | CAAGGCTGAAACTTAAAGGAATTGACGGAAGGGCACCACCAGGAGTGGAGCCTGCGGCTT  | 1157 |
| Query | 1139 | AATTTGACTCAACACGGGGAAACTCACCAGGTCCAGACACAATAAGGATTGACAGATTGA  | 1198 |
| Sbjct | 1158 | AATTTGACTCAACACGGGGAAACTCACCAGGTCCAGACACAATAAGGATTGACAGATTGA  | 1217 |
| Query | 1199 | GAGCTCTTTCTTGATTTTGTGGGTGGTGGTGCATGGCCGTTCTTAGTTGGTGGAGTGATT  | 1258 |
| Sbjct | 1218 | GAGCTCTTTCTTGATTTTGTGGGTGGTGGTGCATGGCCGTTCTTAGTTGGTGGAGTGATT  | 1277 |
| Query | 1259 | TGTCTGCTTAATTGCGATAACGAACGAGACCTTAACCTACTAAATAGTGCTGCTAGCTTT  | 1318 |
| Sbjct | 1278 | TGTCTGCTTAATTGCGATAACGAACGAGACCTTAACCTACTAAATAGTGCTGCTAGCTTT  | 1337 |
| Query | 1319 | TGCTGGTATAGTCACTTCTTAGAGGGACTATCGATTTCAAGTCGATGGAAGTTGAGGCA   | 1378 |

|       |      |                                                               |      |
|-------|------|---------------------------------------------------------------|------|
| Sbjct | 1338 | TGCTGGTATAGTCACTTCCTAGAGGGACTATCGATTTCAAGTCGATGGAAGTTTGAGGCA  | 1397 |
| Query | 1379 | ATAACAGGTCTGTGATGCCCTTAGACGTTCTGGGCCGCACGCGCTACACTGACGGAGC    | 1438 |
|       |      |                                                               |      |
| Sbjct | 1398 | ATAACAGGTCTGTGATGCCCTTAGACGTTCTGGGCCGCACGCGCTACACTGACGGAGT    | 1457 |
| Query | 1439 | -CAACGAGTATTAACCTTGGCCGAGAGGTCTGGGAAATCTTGTGAAACTCCGTCGTGCTG  | 1497 |
|       |      |                                                               |      |
| Sbjct | 1458 | TCAGCGAGTATTAACCTTGGCCGAGAGGTCTGGGAAATCTTGTGAAACTCCGTCGTGCTG  | 1517 |
| Query | 1498 | GGGATAGAGCATTGTAATTATTGCTCTTCAACGAGGAATTCC-TAGTAAGCGCAAGTCAT  | 1556 |
|       |      |                                                               |      |
| Sbjct | 1518 | GGGATAGAGCATTGTA-TTATTGCTCTTCAACGAGGAATTCCCT-GTAAGCGCAAGTCAT  | 1575 |
| Query | 1557 | CAGCTTGCGTTGATTACGTCCCTGCCCTTTGTACACACCGCCCGTCGCTACTACCGATTG  | 1616 |
|       |      |                                                               |      |
| Sbjct | 1576 | CAGCTTGCGTTGATTACGTCCCTGCCCTTTGTACACACCGCCCGTCGCTACTACCGATTG  | 1635 |
| Query | 1617 | AATGGCTTAGTGAGGCCTCCGGATTGGTTTAAA-GAA-GGGGGCAACTCCATCTTGGAAC  | 1674 |
|       |      |                                                               |      |
| Sbjct | 1636 | AATGGCTTAGTGAGGCCTCCGGATTGGTTTAAACGAACGGGGCAACTCCATCTTGGAAC   | 1695 |
| Query | 1675 | CGAAAAGCTGGTCAAACCTTGGTCATTTAGAGGAAGTAAAAGTCGTAACAAGGTTTCCGTA | 1734 |
|       |      |                                                               |      |
| Sbjct | 1696 | CGAAAAGCTGGTCAAACCTTGGTCATTTAGAGGAAGTAAAAGTCGTAACAAGGTTTCCGTA | 1755 |
| Query | 1735 | -GGTGAACCTGCGGAAGGATC                                         | 1754 |
|       |      |                                                               |      |
| Sbjct | 1756 | CGGTGAACCTGCGGAAGGATC                                         | 1776 |

>gb|EU784644.1| Pichia guilliermondii strain CXF-1 18S ribosomal RNA gene, partial sequence  
Length=1739

Score = 3103 bits (1680), Expect = 0.0  
Identities = 1703/1713 (99%), Gaps = 5/1713 (0%)  
Strand=Plus/Plus

|       |     |                                                              |     |
|-------|-----|--------------------------------------------------------------|-----|
| Query | 3   | GCCATGCATGTCTAAGTATAAGCAATTTATACAGTGAAACTGCGAATGGCTCATTAAATC | 62  |
|       |     |                                                              |     |
| Sbjct | 30  | GCCATGCATGTCTAAGTATAAGCAATTTATACAGTGAAACTGCGAATGGCTCATTAAATC | 89  |
| Query | 63  | AGTTATCGTTTATTTGATAGTACCTTTACTACTTGGATAACCGTGGTAATTCTAGAGCTA | 122 |
|       |     |                                                              |     |
| Sbjct | 90  | AGTTATCGTTTATTTGATAGTACCTTTACTACTTGGATAACCGTGGTAATTCTAGAGCTA | 149 |
| Query | 123 | ATACATGCTAAAAATCCCGACTGTTTGAAGGGATGTATTTATTAGATAAAAAATCAATG  | 182 |
|       |     |                                                              |     |
| Sbjct | 150 | ATACATGCTAAAAATCCCGACTGTTTGAAGGGATGTATTTATTAGATAAAAAATCAATG  | 209 |
| Query | 183 | CT-TTTCGGAGCTCTTTGATGATTCATAAATACTTTTCGAATCGCATGGCCTTGTGCTGG | 241 |
|       |     |                                                              |     |
| Sbjct | 210 | CTCTTT--GAGCTCTTTGATGATTCATAAATACTTTTCGAATCGCATGGCCTTGTGCTGG | 267 |
| Query | 242 | CGATGGTTCATTCAAATTTCTGCCCTATCAACTTTCGATGGTAGGATAGTGGCCTACCAT | 301 |
|       |     |                                                              |     |
| Sbjct | 268 | CGATGGTTCATTCAAATTTCTGCCCTATCAACTTTCGATGGTAGGATAGTGGCCTACCAT | 327 |
| Query | 302 | GGTTTCAACGGGTAACGGGGAATAAGGGTTCGATTCCGGAGAGGGAGCCTGAGAAACGGC | 361 |
|       |     |                                                              |     |
| Sbjct | 328 | GGTTTCAACGGGTAACGGGGAATAAGGGTTCGATTCCGGAGAGGGAGCCTGAGAAACGGC | 387 |
| Query | 362 | TACCACATCCAAGGAAGGCAGCAGGCGCGCAAATTACCAATCCCGACACGGGGAGGTAG  | 421 |

|       |      |                                                                   |      |
|-------|------|-------------------------------------------------------------------|------|
| Sbjct | 388  | <br>TACCACATCCAAGGAAGGCAGCAGGCGCAAATTACCCAATCCCGACACGGGGAGGTAG    | 447  |
| Query | 422  | TGACAATAAATAACGATACAGGGCCCTTTCGGGTCTTGTAATTGGAATGAGTACAATGTA      | 481  |
| Sbjct | 448  | <br>TGACAATACATAACGATACAGGGCCCTTTCGGGTCTTGTAATTGGAATGAGTACAATGTA  | 507  |
| Query | 482  | AATACCTTAACGAGGAACAATTGGAGGGCAAGTCTGGTGCCAGCAGCCGCGGTAATTCCA      | 541  |
| Sbjct | 508  | <br>AATACCTTAACGAGGAACAATTGGAGGGCAAGTCTGGTGCCAGCAGCCGCGGTAATTCCA  | 567  |
| Query | 542  | GCTCCAATAGCGTATATTAAGTTGTTGCAGTTAAAAAGCTCGTAGTTGAACCTTGGGCT       | 601  |
| Sbjct | 568  | <br>GCTCCAATAGCGTATATTAAGTTGTTGCAGTTAAAAAGCTCGTAGTTGAACCTTGGGCT   | 627  |
| Query | 602  | TGGTTGGCCGGTCCGCCTTTTTGGCGAGTACTGGACCCAACCGAGCCTTTCCTTCTGGCT      | 661  |
| Sbjct | 628  | <br>TGGTTGGCCGGTCCGCCTTTTTGGCGAGTACTGGACCCAACCGAGCCTTTCCTTCTGGCT  | 687  |
| Query | 662  | AACCTTTCGCCCTTGTGGTGTGGCGAACCAGGACTTTTACTTTGAAAAATTAGAGTG         | 721  |
| Sbjct | 688  | <br>AACCATTCGCCCTTGTGGTGTGGCGAACCAGGACTTTTACTTTGAAAAATTAGAGTG     | 747  |
| Query | 722  | TTCAAAGCAGGCCTTTGCTCGAATATATTAGCATGGAATAATAGAATAGGACGTTATGGT      | 781  |
| Sbjct | 748  | <br>TTCAAAGCAGGCCTTTGCTCGAATATATTAGCATGGAATAATAGAATAGGACGTTATGGT  | 807  |
| Query | 782  | TCTATTTTGTGGTTTCTAGGACCATCGTAATGATTAATAGGGACGGTCGGGGGCATCAG       | 841  |
| Sbjct | 808  | <br>TCTATTTTGTGGTTTCTAGGACCATCGTAATGATTAATAGGGACGGTCGGGGGCATCAG   | 867  |
| Query | 842  | TATTCAGTTGTCAGAGGTGAAATTCTTGGA-TTACCTGAAGACTAACTACTGCGAAAGCA      | 900  |
| Sbjct | 868  | <br>TATTCAGTTGTCAGAGGTGAAATTCTTAGATTTA-CTGAAGACTAACTACTGCGAAAGCA  | 926  |
| Query | 901  | TTTGCCAAGGACGTTTTTCATTAATCAAGAACGAAAGTTAGGGGATCGAAGATGATCAGAT     | 960  |
| Sbjct | 927  | <br>TTTGCCAAGGACGTTTTTCATTAATCAAGAACGAAAGTTAGGGGATCGAAGATGATCAGAT | 986  |
| Query | 961  | ACCGTCGTAGTCTTAACCATAAACTATGCCGACTAGGGATCGGGTGTGTTCTtttttttG      | 1020 |
| Sbjct | 987  | <br>ACCGTCGTAGTCTTAACCATAAACTATGCCGACTAGGGATCGGGTGTGTTCTTTTTTTG   | 1046 |
| Query | 1021 | ACGCACTCGGCACCTTACGAGAAATCAAAGTCTTTGGGTTCTGGGGGAGTATGGTCGCA       | 1080 |
| Sbjct | 1047 | <br>ACGCACTCGGCACCTTACGAGAAATCAAAGTCTTTGGGTTCTGGGGGAGTATGGTCGCA   | 1106 |
| Query | 1081 | AGGCTGAAACTTAAAGGAATTGACGGAAGGGCACCACCAGGAGTGGAGCCTGCGGCTTAA      | 1140 |
| Sbjct | 1107 | <br>AGGCTGAAACTTAAAGGAATTGACGGAAGGGCACCACCAGGAGTGGAGCCTGCGGCTTAA  | 1166 |
| Query | 1141 | TTTGACTCAACACGGGGAAACTCACCAGGTCCAGACACAATAAGGATTGACAGATTGAGA      | 1200 |
| Sbjct | 1167 | <br>TTTGACTCAACACGGGGAAACTCACCAGGTCCAGACACAATAAGGATTGACAGATTGAGA  | 1226 |
| Query | 1201 | GCTCTTCTTGATTTTGTGGGTGGTGGTGCATGGCCGTTCTTAGTTGGTGGAGTGATTTG       | 1260 |
| Sbjct | 1227 | <br>GCTCTTCTTGATTTTGTGGGTGGTGGTGCATGGCCGTTCTTAGTTGGTGGAGTGATTTG   | 1286 |
| Query | 1261 | TCTGCTTAATTGCGATAACGAACGAGACCTTAACCTACTAAATAGTGCTGCTAGCTTTTG      | 1320 |
| Sbjct | 1287 | <br>TCTGCTTAATTGCGATAACGAACGAGACCTTAACCTACTAAATAGTGCTGCTAGCTTTTG  | 1346 |
| Query | 1321 | CTGGTATAGTCACTTCTTAGAGGGACTATCGATTTCAAGTCGATGGAAGTTTGAGGCAAT      | 1380 |



|       |      |                                                                  |      |
|-------|------|------------------------------------------------------------------|------|
| Sbjct | 1347 | <br>CTGGTATAGTCACTTCTTAGAGGGACTATCGATTTCAAGTCGATGGAAGTTTGAGGCAAT | 1406 |
| Query | 1381 | AACAGGTCTGTGATGCCCTTAGACGTTCTGGGCCGCACGCGCTACACTGACGGAGCCA       | 1440 |
| Sbjct | 1407 | <br>AACAGGTCTGTGATGCCCTTAGACGTTCTGGGCCGCACGCGCTACACTGACGGAGCCA   | 1466 |
| Query | 1441 | ACGAGTATTAACCTTGGCCGAGAGGTCTGGGAAATCTTGTGAAACTCCGTCGTGCTGGGG     | 1500 |
| Sbjct | 1467 | <br>GCGAGTATTAACCTTGGCCGAGAGGTCTGGGAAATCTTGTGAAACTCCGTCGTGCTGGGG | 1526 |
| Query | 1501 | ATAGAGCATTGTAATTATTGCTCTTCAACGAGGAATTCCTAGTAAGCGCAAGTCATCAGC     | 1560 |
| Sbjct | 1527 | <br>ATAGAGCATTGTAATTATTGCTCTTCAACGAGGAATTCCTAGTAAGCGCAAGTCATCAGC | 1586 |
| Query | 1561 | TTGCGTTGATTACGTCCCTGCCCTTTGTACACACCGCCGTCGCTACTACCGATTGAATG      | 1620 |
| Sbjct | 1587 | <br>TTGCGTTGATTACGTCCCTGCCCTTTGTACACACCGCCGTCGCTACTACCGATTGAATG  | 1646 |
| Query | 1621 | GCTTAGTGAGGCCTCCGATTGGTTTAAAGAAGGGGGCAACTCCATCTTGAACCGAAAA       | 1680 |
| Sbjct | 1647 | <br>GCTTAGTGAGGCCTCCGATTGGTTTAAAGAAGGGGGCAACTCCATCTTGAACCGAAAA   | 1706 |
| Query | 1681 | GCTGGTCAAACCTTGGTCATTTAGAGGAAGTAAA                               | 1713 |
| Sbjct | 1707 | <br>GCTGGTCAAACCTTGGTCATTTAGAGGAAGTAAA                           | 1739 |

>dbj|AB013573.1| Candida fragi 18S rRNA gene, strain JCM 1791, partial sequence  
Length=1781

Score = 3101 bits (1679), Expect = 0.0  
Identities = 1733/1758 (98%), Gaps = 8/1758 (0%)  
Strand=Plus/Plus

|       |     |                                                                  |     |
|-------|-----|------------------------------------------------------------------|-----|
| Query | 3   | GCCATGCATGTCTAAGTATAAGCAATTTATACAGTGAAACTGCGAATGGCTCATTAAATC     | 62  |
| Sbjct | 30  | <br>GCCATGCATGTCTAAGTATAAGCAATTTATACAGTGAAACTGCGAATGGCTCATTAAATC | 89  |
| Query | 63  | AGTTATCGTTTATTTGATAGTACCTTTACTACTTGGATAACCGTGGTAATTCTAGAGCTA     | 122 |
| Sbjct | 90  | <br>AGTTATCGTTTATTTGATAGTACCTTTACTACTTGGATAACCGTGGTAATTCTAGAGCTA | 149 |
| Query | 123 | ATACATGCTAAAAATCCCGACTGTTTGAAGGGATGTATTTATTAGATAAAAAATCAATG      | 182 |
| Sbjct | 150 | <br>ATACATGCTAAAAATCCCGACT-TCTGGAAGGGATGTATTTATTAGATAAAAAATCAATG | 208 |
| Query | 183 | CT-TTTCGGAGCTCTTTGATGATTCATAATAACTTTTCGAATCGCATGGCCTTGTGCTGG     | 241 |
| Sbjct | 209 | <br>CTCTTT--GAGCTCTTTGATGATTCATAATAACTTTTCGAATCGCATGGCCTTGTGCTGG | 266 |
| Query | 242 | CGATGGTTCATTCAAATTTCTGCCCTATCAACTTTCGATGGTAGGATAGTGGCCTACCAT     | 301 |
| Sbjct | 267 | <br>CGATGGTTCATTCAAATTTCTGCCCTATCAACTTTCGATGGTAGGATAGTGGCCTACCAT | 326 |
| Query | 302 | GGTTTCAACGGGTAACGGGGAATAAGGGTTCGATTCCGGAGAGGGAGCCTGAGAAACGGC     | 361 |
| Sbjct | 327 | <br>GGTTTCAACGGGTAACGGGGAATAAGGGTTCGATTCCGGAGAGGGAGCCTGAGAAACGGC | 386 |
| Query | 362 | TACCACATCCAAGGAAGGCAGCAGGCGCGCAAATTACCCAATCCCGACACGGGGAGGTAG     | 421 |
| Sbjct | 387 | <br>TACCACATCCAAGGAAGGCAGCAGGCGCGCAAATTACCCAATCCCGACACGGGGAGGTAG | 446 |
| Query | 422 | TGACAATAAATAACGATACAGGGCCCTTTCGGGTCTTGTAAATTGGAATGAGTACAATGTA    | 481 |

|       |      |                                                                   |      |
|-------|------|-------------------------------------------------------------------|------|
| Sbjct | 447  | <br>TGACAATAAATAACGTTACAGGGCCTTTCGGGTCTTGTAATCGGAATGAGTACAATCTA   | 506  |
| Query | 482  | AATACCTTAACGAGGAACAATTGGAGGGCAAGTCTGGTGCCAGCAGCCGCGTAATTCCA       | 541  |
| Sbjct | 507  | <br>AATACCTTAACGAGGAACAATTGGAGGGCAAGTCTGGTGCCAGCAGCCGCGTAATTCCA   | 566  |
| Query | 542  | GCTCCAATAGCGTATATTAAGTTGTTGCAGTTAAAAAGCTCGTAGTTGAACCTTGGGCT       | 601  |
| Sbjct | 567  | <br>GCTCCAATAGCGTATATTAAGTTGTTGCAGTTAAAAAGCTCGTAGTTGAACCTTGGGCT   | 626  |
| Query | 602  | TGGTTGGCCGGTCCGCTTTTTGGCGAGTACTGGACCCAACCGAGCCTTTCCTTCTGGCT       | 661  |
| Sbjct | 627  | <br>TGGTTGGCCGGTCCG-CTTTATGGCGAGTACTGGACCCAACCGAGCCTTTCCTTCTGGCT  | 685  |
| Query | 662  | AACCTTTCGCCCTTGTGGTGTGGCGAACCAGGACTTTTACTTTGAAAAATTAGAGTG         | 721  |
| Sbjct | 686  | <br>AACCTTTCCTTTTTGGTGTGGCGAACCAGGACTTTTACTTTGAAAAATTAGAGTG       | 745  |
| Query | 722  | TTCAAAGCAGGCCTTTGCTCGAATATATTAGCATGGAATAATAGAATAGGACGTTATGGT      | 781  |
| Sbjct | 746  | <br>TTCAAAGCAGGCCTTTGCTCGAATATATTAGCATGGAATAATAGAATAGGACGTTATGGT  | 805  |
| Query | 782  | TCTATTTTGTGGTTTCTAGGACCATCGTAATGATTAATAGGGACGGTCGGGGGCATCAG       | 841  |
| Sbjct | 806  | <br>TCTATTTTGTGGTTTCTAGGACCATCGTAATGATTAATAGGGACGGTCGGGGGCATCAG   | 865  |
| Query | 842  | TATTCAGTTGTCAGAGGTGAAATTCTTGGA-TTACCTGAAGACTAACTACTGCGAAAGCA      | 900  |
| Sbjct | 866  | <br>TATTCAGTTGTCAGAGGTGAAATTCTTGGA-TTACCTGAAGACTAACTACTGCGAAAGCA  | 924  |
| Query | 901  | TTTGCCAAGGACGTTTTTCATTAATCAAGAACGAAAGTTAGGGGATCGAAGATGATCAGAT     | 960  |
| Sbjct | 925  | <br>TTTGCCAAGGACGTTTTTCATTAATCAAGAACGAAAGTTAGGGGATCGAAGATGATCAGAT | 984  |
| Query | 961  | ACCGTCGTAGTCTTAACCATAAACTATGCCGACTAGGGATCGGGTGTGTTCTtttttttG      | 1020 |
| Sbjct | 985  | <br>ACCGTCGTAGTCTTAACCATAAACTATGCCGACTAGGGATCGGGTGTGTTCTTTTTTTG   | 1044 |
| Query | 1021 | ACGCACTCGGCACCTTACGAGAAATCAAAGTCTTTGGGTTCTGGGGGAGTATGGTCGCA       | 1080 |
| Sbjct | 1045 | <br>ACGCACTCGGCACCTTACGAGAAATCAAAGTCTTTGGGTTCTGGGGGAGTATGGTCGCA   | 1104 |
| Query | 1081 | AGGCTGAAACTTAAAGGAATTGACGGAAGGGCACCACCAGGAGTGGAGCCTGCGGCTTAA      | 1140 |
| Sbjct | 1105 | <br>AGGCTGAAACTTAAAGGAATTGACGGAAGGGCACCACCAGGAGTGGAGCCTGCGGCTTAA  | 1164 |
| Query | 1141 | TTTGACTCAACACGGGGAAACTCACCAGGTCCAGACACAATAAGGATTGACAGATTGAGA      | 1200 |
| Sbjct | 1165 | <br>TTTGACTCAACACGGGGAAACTCACCAGGTCCAGACACAATAAGGATTGACAGATTGAGA  | 1224 |
| Query | 1201 | GCTCTTTCTTGATTTTGTGGGTGGTGGTGCATGGCCGTTCTTAGTTGGTGGAGTGATTTG      | 1260 |
| Sbjct | 1225 | <br>GCTCTTTCTTGATTTTGTGGGTGGTGGTGCATGGCCGTTCTTAGTTGGTGGAGTGATTTG  | 1284 |
| Query | 1261 | TCTGCTTAATTGCGATAACGAACGAGACCTTAACCTACTAAATAGTGCTGCTAGCTTTTG      | 1320 |
| Sbjct | 1285 | <br>TCTGCTTAATTGCGATAACGAACGAGACCTTAACCTACTAAATAGTGCTGCTAGCATTTG  | 1344 |
| Query | 1321 | CTGGTATAGTCACTTCTTAGAGGGACTATCGATTTCAAGTCGATGGAAGTTTGAGGCAAT      | 1380 |
| Sbjct | 1345 | <br>CTGGTATAGTCACTTCTTAGAGGGACTATCGATTTCAAGTCGATGGAAGTTTGAGGCAAT  | 1404 |
| Query | 1381 | AACAGGTCTGTGATGCCCTTAGACGTTCTGGGCCGCACGCGCTACACTGACGGAGCCA        | 1440 |

|       |      |                                                                  |      |
|-------|------|------------------------------------------------------------------|------|
| Sbjct | 1405 | <br>AACAGGTCTGTGATGCCCTTAGACGTTCTGGGCCGCACGCGCTACACTGACGGAGCCA   | 1464 |
| Query | 1441 | ACGAGTATTAACCTTGGCCGAGAGGTCTGGGAAATCTTGTGAAACTCCGTCGTGCTGGGG     | 1500 |
| Sbjct | 1465 | <br>GCGAGTTTTAACCTTGGCCGAGAGGTCTGGGTAATCTTGTGAAACTCCGTCGTGCTGGGG | 1524 |
| Query | 1501 | ATAGAGCATTGTAATTATTGCTCTTCAACGAGGAATTCCTAGTAAGCGCAAGTCATCAGC     | 1560 |
| Sbjct | 1525 | <br>ATAGAGCATTGTAATTTTTGCTCTTCAACGAGGAATTCCTAGTAAGCGCAAGTCATCAGC | 1584 |
| Query | 1561 | TTGCGTTGATTACGTCCCTGCCCTTTGTACACACCGCCCGTCGCTACTACCGATTGAATG     | 1620 |
| Sbjct | 1585 | <br>TTGCGTTGATTACGTCCCTGCCCTTTGTACACACCGCCCGTCGCTACTACCGATTGAATG | 1644 |
| Query | 1621 | GCTTAGTGAGGCCTCCGGATTGGTTTAAAGAAGGGGGCAACTCCATCTTGAACCGAAAA      | 1680 |
| Sbjct | 1645 | <br>GCTTAGTGAGGCTTCCGGATTGGTTTAAAGAAGGGGGCAACTCCATCTTGAACCGAAAA  | 1704 |
| Query | 1681 | GCTGGTCAAACCTTGGTCATTTAGAGGAAGTAAAGTCGTAACAAGTTTCCGTAGGTGAA      | 1740 |
| Sbjct | 1705 | <br>GCTAGTCAAACCTTGGTCATTTAGAGGAAGTAAAGTCGTAACAAGTTTCCGTAG-TGAA  | 1763 |
| Query | 1741 | CCTGCGGAAGGATCATT                                                | 1758 |
| Sbjct | 1764 | <br>CCTGCGGAAGGATCATT                                            | 1781 |

>emb|FN690501.1| Uncultured fungus partial 18S rRNA gene, clone 3b-D8  
Length=1686

Score = 3097 bits (1677), Expect = 0.0  
Identities = 1683/1686 (99%), Gaps = 1/1686 (0%)  
Strand=Plus/Plus

|       |     |                                                                   |     |
|-------|-----|-------------------------------------------------------------------|-----|
| Query | 7   | TGCATGTCTAAGTATAAGCAATTTATACAGT-GAAACTGCGAATGGCTCATTAAATCAGT      | 65  |
| Sbjct | 1   | <br>TGCATGTCTAAGTATAAGCAATTTATACAGTGGAAACTGCGAATGGCTCATTAAATCAGT  | 60  |
| Query | 66  | TATCGTTTATTTGATAGTACCTTTACTACTTGGATAACCGTGGTAATTCTAGAGCTAATA      | 125 |
| Sbjct | 61  | <br>TATCGTTTATTTGATAGTACCTTTACTACTTGGATAACCGTGGTAATTCTAGAGCTAATA  | 120 |
| Query | 126 | CATGCTAAAAATCCCGACTGTTTGGAAAGGGATGTATTTATTAGATAAAAAATCAATGCTT     | 185 |
| Sbjct | 121 | <br>CATGCTAAAAATCCCGACTGTTTGGAAAGGGATGTATTTATTAGATAAAAAATCAATGCTT | 180 |
| Query | 186 | TTCGGAGCTCTTTGATGATTACATAAATACTTTTCGAATCGCATGGCCTTGTGCTGGCGAT     | 245 |
| Sbjct | 181 | <br>TTCGGAGCTCTTTGATGATTACATAAATACTTTTCGAATCGCATGGCCTTGTGCTGGCGAT | 240 |
| Query | 246 | GGTTCATTCAAATTTCTGCCCTATCAACTTTTCGATGGTAGGATAGTGGCCTACCATGGTT     | 305 |
| Sbjct | 241 | <br>GGTTCATTCAAATTTCTGCCCTATCAACTTTTCGATGGTAGGATAGTGGCCTACCATGGTT | 300 |
| Query | 306 | TCAACGGGTAACGGGGAATAAGGGTTTCGATTCCGGAGAGGGAGCCTGAGAAACGGCTACC     | 365 |
| Sbjct | 301 | <br>TCAACGGGTAACGGGGAATAAGGGTTTCGATTCCGGAGAGGGAGCCTGAGAAACGGCTACC | 360 |
| Query | 366 | ACATCCAAGGAAGGCAGCAGGCGCGCAAATTACCCAATCCCGACACGGGGAGGTAGTGAC      | 425 |
| Sbjct | 361 | <br>ACATCCAAGGAAGGCAGCAGGCGCGCAAATTACCCAATCCCGACACGGGGAGGTAGTGAC  | 420 |
| Query | 426 | AATAAATAACGATACAGGGCCCTTTTCGGGTCTTGTAAATTGGAATGAGTACAATGTAAATA    | 485 |

|       |      |                                                                   |      |
|-------|------|-------------------------------------------------------------------|------|
| Sbjct | 421  | <br>AATAAATAACGATACAGGGCCCTTTCGGGTCCTGTAAATTGGAATGAGTACAATGTAAATA | 480  |
| Query | 486  | CCTTAACGAGGAACAATTGGAGGGCAAGTCTGGTGCCAGCAGCCGCGTAATTCAGCTC        | 545  |
| Sbjct | 481  | <br>CCTTAACGAGGAACAATTGGAGGGCAAGTCTGGTGCCAGCAGCCGCGTAATTCAGCTC    | 540  |
| Query | 546  | CAATAGCGTATATTTAAAGTTGTTGCAGTTAAAAAGCTCGTAGTTGAACCTTGGGCTTGGT     | 605  |
| Sbjct | 541  | <br>CAATAGCGTATATTTAAAGTTGTTGCAGTTAAAAAGCTCGTAGTTGAACCTTGGGCTTGGT | 600  |
| Query | 606  | TGGCCGGTCCGCCTTTTTTGGCGAGTACTGGACCAACCGAGCCTTTCCTTCTGGCTAACC      | 665  |
| Sbjct | 601  | <br>TGGCCGGTCCGCCTTTTTTGGCGAGTACTGGACCAACCGAGCCTTTCCTTCTGGCTAACC  | 660  |
| Query | 666  | TTTCGCCCTTGTGGTGTTTGGCGAACCAGGACTTTTACTTTGAAAAAATTAGAGTGTTCA      | 725  |
| Sbjct | 661  | <br>TTTCGCCCTTGTGGTGTTTGGCGAACCAGGACTTTTACTTTGAAAAAATTAGAGTGTTCA  | 720  |
| Query | 726  | AAGCAGGCCTTTGCTCGAATATATTAGCATGGAATAATAGAATAGGACGTTATGGTTCTA      | 785  |
| Sbjct | 721  | <br>AAGCAGGCCTTTGCTCGAATATATTAGCATGGAATAATAGAATAGGACGTTATGGTTCTA  | 780  |
| Query | 786  | TTTTGTTGGTTTCTAGGACCATCGTAATGATTAATAGGGACGGTCGGGGGCATCAGTATT      | 845  |
| Sbjct | 781  | <br>TTTTGTTGGTTTCTAGGACCATCGTAATGATTAATAGGGACGGTCGGGGGCATCAGTATT  | 840  |
| Query | 846  | CAGTTGTCAGAGGTGAAATTCTTGGATTACCTGAAGACTAACTACTGCGAAAGCATTTC       | 905  |
| Sbjct | 841  | <br>CAGTTGTCAGAGGTGAAATTCTTGGATTACCTGAAGACTAACTACTGCGAAAGCATTTC   | 900  |
| Query | 906  | CAAGGACGTTTTTCATTAATCAAGAACGAAAGTTAGGGGATCGAAGATGATCAGATACCGT     | 965  |
| Sbjct | 901  | <br>CAAGGACGTTTTTCATTAATCAAGAACGAAAGTTAGGGGATCGAAGATGATCAGATACCGT | 960  |
| Query | 966  | CGTAGTCTTAACCATAAACTATGCCGACTAGGGATCGGGTGTTGTTCTtttttttGACGCA     | 1025 |
| Sbjct | 961  | <br>CGTAGTCTTAACCATAAACTATGCCGACTAGGGATCGGGTGTTGTTCTTTTTTTGACGCA  | 1020 |
| Query | 1026 | CTCGGCACCTTACGAGAAATCAAAGTCTTTGGGTTCTGGGGGAGTATGGTCGCAAGGCT       | 1085 |
| Sbjct | 1021 | <br>CTCGGCACCTTACGAGAAATCAAAGTCTTTGGGTTCTGGGGGAGTATGGTCGCAAGGCT   | 1080 |
| Query | 1086 | GAAACTTAAAGGAATTGACGGAAGGGCACCACCAGGAGTGGAGCCTGCGGCTTAATTTGA      | 1145 |
| Sbjct | 1081 | <br>GAAACTTAAAGGAATTGACGGAAGGGCACCACCAGGAGTGGAGCCTGCGGCTTAATTTGA  | 1140 |
| Query | 1146 | CTCAACACGGGGAAACTCACCAGGTCCAGACACAATAAGGATTGACAGATTGAGAGCTCT      | 1205 |
| Sbjct | 1141 | <br>CTCAACACGGGGAAACTCACCAGGTCCAGACACAATAAGGATTGACAGATTGAGAGCTCT  | 1200 |
| Query | 1206 | TTCTTGATTTTGTGGGTGGTGGTGCATGGCCGTTCTTAGTTGGTGGAGTGATTTGTCTGC      | 1265 |
| Sbjct | 1201 | <br>TTCTTGATTTTGTGGGTGGTGGTGCATGGCCGTTCTTAGTTGGTGGAGTGATTTGTCTGC  | 1260 |
| Query | 1266 | TTAATTGCGATAACGAACGAGACCTTAACCTACTAAATAGTGCTGCTAGCTTTTGCTGGT      | 1325 |
| Sbjct | 1261 | <br>TTAATTGCAATAACGAACGAGACCTTAACCTACTAAATAGTGCTGCTAGCTTTTGCTGGT  | 1320 |
| Query | 1326 | ATAGTCACTTCTTAGAGGGACTATCGATTTCAAGTCGATGGAAGTTTGGAGCAATAACAG      | 1385 |
| Sbjct | 1321 | <br>ATAGTCACTTCTTAGAGGGACTATCGATTTCAAGTCGATGGAAGTTTGGAGCAATAACAG  | 1380 |
| Query | 1386 | GTCTGTGATGCCCTTAGACGTTCTGGGCCGCACGCGCTACACTGACGGAGCCAACGAG        | 1445 |

```

Sbjct 1381 |||||
GTCTGTGATGCCCTTAGACGTTCTGGGCCGACGCGCTACACTGACGGAGCCAACGAG 1440
Query 1446 TATTAACCTTGCCGAGAGGTCTGGGAAATCTTGTGAAACTCCGTCGTGCTGGGGATAGA 1505
|||
Sbjct 1441 TATTAACCTTGCCGAGAGGTCTGGGAAATCTTGTGAAACTCCGTCGTGCTGGGGATAGA 1500
Query 1506 GCATTGTAATTATTGCTCTTCAACGAGGAATTCCTAGTAAGCGCAAGTCATCAGCTTGCG 1565
|||
Sbjct 1501 GCATTGTAATTATTGCTCTTCAACGAGGAATTCCTAGTAAGCGCAAGTCATCAGCTTGCG 1560
Query 1566 TTGATTACGTCCCTGCCCTTTGTACACACCGCCGTCGCTACTACCGATTGAATGGCTTA 1625
|||
Sbjct 1561 TTGATTACGTCCCTGCCCTTTGTACACACCGCCGTCGCTACTACCGATTGAATGGCTTA 1620
Query 1626 GTGAGGCCTCCGGATTGGTTTAAAGAAGGGGGCAACTCCATCTTGGAACCGAAAAGCTGG 1685
|||
Sbjct 1621 GTGAGGCCTCCGGATTGGTTTAAAGAAGGGGGCAACTCCATCTNGGAACCGAAAAGCTGG 1680
Query 1686 TCAAAC 1691
|||
Sbjct 1681 TCAAAC 1686

```

>dbj|AB054275.1| Debaryomyces polymorphus gene for 18S rRNA, partial sequence, strain:JCM 3647  
Length=1751

Score = 3097 bits (1677), Expect = 0.0  
Identities = 1715/1734 (98%), Gaps = 4/1734 (0%)  
Strand=Plus/Plus

```

Query 3 GCCATGCATGTCTAAGTATAAGCAATTTATACAGTGAAACTGCGAATGGCTCATTAAATC 62
|||
Sbjct 21 GCCATGCATGTCTAAGTATAAGCAATTTATACAGTGAAACTGCGAATGGCTCATTAAATC 80
Query 63 AGTTATCGTTTATTTGATAGTACCTTTACTACTTGGATAACCGTGGTAATTCTAGAGCTA 122
|||
Sbjct 81 AGTTATCGTTTATTTGATAGTACCTTTACTACTTGGATAACCGTGGTAATTCTAGAGCTA 140
Query 123 ATACATGCTAAAAATCCCGACTGTTTGAAGGGATGTATTTATTAGATAAAAAATCAATG 182
|||
Sbjct 141 ATACATGCTAAAAATCCCGACTGTTTGAAGGGATGTATTTATTAGATAAAAAATCAATG 200
Query 183 CTTTTCGGAGCTCTTTGATGATTCAATAAATTTTCGAATCGCATGGCCTTGTGCTGGC 242
|||
Sbjct 201 CTTTTCGGAGCTCTTTGATGATTCAATAAATTTTCGAATCGCATGGCCTTGTGCTGGC 260
Query 243 GATGGTTCATTCAAATTTCTGCCCTATCAACTTTTCGATGGTAGGATAGTGGCCTACCATG 302
|||
Sbjct 261 GATGGTTCATTCAAATTTCTGCCCTATCAACTTTTCGATGGTAGGATAGTGGCCTACCATG 320
Query 303 GTTTCAACGGGTAACGGGGAATAAGGGTTCGATTCCGGAGAGGGAGCCTGAGAAACGGCT 362
|||
Sbjct 321 GTTTCAACGGGTAACGGGGAATAAGGGTTCGATTCCGGAGAGGGAGCCTGAGAAACGGCT 380
Query 363 ACCACATCCAAGGAAGGCAGCAGGCGCGCAAATTACCCAATCCCGACACGGGGAGGTAGT 422
|||
Sbjct 381 ACCACATCCAAGGAAGGCAGCAGGCGCGCAAATTACCCAATCCCAATACGGGGAGGTAGT 440
Query 423 GACAATAAATAACGATACAGGGCCCTTTTCGGGTCTTGTAAATTGGAATGAGTACAATGTAA 482
|||
Sbjct 441 GACAATAAATAACGATACAGGGCC- TTTTCGGGTCTTGTAAATTGGAATGAGTACAATGTAA 499

```

|       |      |                                                               |      |
|-------|------|---------------------------------------------------------------|------|
| Query | 483  | ATACCTTAACGAGGAACAATTGGAGGGCAAGTCTGGTGCCAGCAGCCGCGGTAATTCCAG  | 542  |
|       |      |                                                               |      |
| Sbjct | 500  | ATACCTTAACGAGGAACAATTGGAGGGCAAGTCTGGTGCCAGCAGCCGCGGTAATTCCAG  | 559  |
| Query | 543  | CTCCAATAGCGTATATTAAGTTGTTGCAGTTAAAAAGCTCGTAGTTGAACCTTGGGCTT   | 602  |
|       |      |                                                               |      |
| Sbjct | 560  | CTCCAATAGCGTATATTAAGTTGTTGCAGTTAAAAAGCTCGTAGTTGAACCTTGGGCTT   | 619  |
| Query | 603  | GGTTGGCCGGTCCGCCTTTTTGGCGAGTACTGGACCCAACCGAGCCTTTCCTTCTGGCTA  | 662  |
|       |      |                                                               |      |
| Sbjct | 620  | GGTTGGCCGGTCCGCCTTTTTGGCGTGTACTGGACCCAACCGAGCCTTTCCTTCTGGCTA  | 679  |
| Query | 663  | ACCTTTCGCCCTTGTGGTGTGGCGAACCAGGACTTTTACTTTGAAAAAATTAGAGTGT    | 722  |
|       |      |                                                               |      |
| Sbjct | 680  | ACCTCTCGCCCTTGTGGTGTGGCGAACCAGGACTTTTACTTTGAAAAAATTAGAGTGT    | 739  |
| Query | 723  | TCAAAGCAGGCCTTTGCTCGAATATATTAGCATGGAATAATAGAATAGGACGTTATGGTT  | 782  |
|       |      |                                                               |      |
| Sbjct | 740  | TCAAAGCAGGCCTTTGCTCGAATATATTAGCATGGAATAATAGAATAGGACGTTATGGTT  | 799  |
| Query | 783  | CTATTTTGTGGTTTCTAGGACCATCGTAATGATTAATAGGGACGGTCGGGGGCATCAGT   | 842  |
|       |      |                                                               |      |
| Sbjct | 800  | CTATTTTGTGGTTTCTAGGACCATCGTAATGATTAATAGGGACGGTCGGGGGCATCAGT   | 859  |
| Query | 843  | ATTCAGTTGTCAGAGGTGAAATTCTTGGATT-ACCTGAAGACTAACTACTGCGAAAGCAT  | 901  |
|       |      |                                                               |      |
| Sbjct | 860  | ATTCAGTTGTCAGAGGTGAAATTCTTGGATTAC-TGAAGACTAACTACTGCGAAAGCAT   | 918  |
| Query | 902  | TTGCCAAGGACGTTTTCAATTAATCAAGAACGAAAGTTAGGGGATCGAAGATGATCAGATA | 961  |
|       |      |                                                               |      |
| Sbjct | 919  | TTGCCAAGGACGTTTTCAATTAATCAAGAACGAAAGTTAGGGGATCGAAGATGATCAGATA | 978  |
| Query | 962  | CCGTCGTAGTCTTAACCATAAACTATGCCGACTAGGGATCGGGTGTGTTCTttttttGA   | 1021 |
|       |      |                                                               |      |
| Sbjct | 979  | CCGTCGTAGTCTTAACCATAAACTATGCCGACTAGGGATCGGGTGTGTTCTTTTTTTGA   | 1038 |
| Query | 1022 | CGCACTCGGCACCTTACGAGAAATCAAAGTCTTTGGGTTCTGGGGGAGTATGGTCGCAA   | 1081 |
|       |      |                                                               |      |
| Sbjct | 1039 | CGGACTCGGCACCTTACGGGAAATCAAAGTCTTTGGGTTCTGGGGGAGTATGGTCGCAA   | 1098 |
| Query | 1082 | GGCTGAAACTTAAAGGAATTGACGGAAGGGCACCACCAGGAGTGGAGCCTGCGGCTTAAT  | 1141 |
|       |      |                                                               |      |
| Sbjct | 1099 | GGCTGAAACTTAAAGGAATTGACGGAAGGGCACCACCAGGAGTGG-GACTGCGGCTTAAT  | 1157 |
| Query | 1142 | TTGACTCAACACGGGGAAACTCACCAGGTCCAGACACAATAAGGATTGACAGATTGAGAG  | 1201 |
|       |      |                                                               |      |
| Sbjct | 1158 | TTGACTCAACACGGGGAAACTCACCAGGTCCAGACACAATAAGGATTGACAGATTGAGAG  | 1217 |
| Query | 1202 | CTCTTTCTTGATTTTGTGGGTGGTGGTGCATGGCCGTTCTTAGTTGGTGGAGTGATTTGT  | 1261 |
|       |      |                                                               |      |
| Sbjct | 1218 | CTCTTTCTTGATTTTGTGGGTGGTGGTGCATGGCCGTTCTTAGTTGGTGGAGTGATTTGT  | 1277 |
| Query | 1262 | CTGCTTAATTGCGATAACGAACGAGACCTTAACCTACTAAATAGTGCTGCTAGCTTTTGC  | 1321 |
|       |      |                                                               |      |
| Sbjct | 1278 | CTGCTTAATTNNGATAACGAACGAGACCTTAACCTACTAAATAGTGCTGCTAGCTTAGGC  | 1337 |
| Query | 1322 | TGGTATAGTCACTTCTTAGAGGGACTATCGATTTCAAGTCGATGGAAGTTTGAGGCAATA  | 1381 |
|       |      |                                                               |      |
| Sbjct | 1338 | TGGTATAGTCACTTCTTAGAGGGACTATCGATTTCAAGTCGATGGAAGTTTGAGGCAATA  | 1397 |
| Query | 1382 | ACAGGTCTGTGATGCCCTTAGACGTTCTGGGCCGCACGCGCGCTACACTGACGGAGCCAA  | 1441 |
|       |      |                                                               |      |
| Sbjct | 1398 | ACAGGTCTGTGATGCCCTTAGACGTTCTGGGCCGCACGCGCGCTACACTGACGGAGCCAG  | 1457 |



|       |      |                                                               |      |
|-------|------|---------------------------------------------------------------|------|
| Sbjct | 500  | ATACCTTAACGAGGAACAATTGGAGGGCAAGTCTGGTGCCAGCAGCCGCGGTAATTCCAG  | 559  |
| Query | 543  | CTCCAATAGCGTATATTAAGTTGTTGCAGTTAAAAAGCTCGTAGTTGAACCTTGGGCTT   | 602  |
| Sbjct | 560  | CTCCAATAGCGTATATTAAGTTGTTGCAGTTAAAAAGCTCGTAGTTGAACCTTGGGCTT   | 619  |
| Query | 603  | GGTTGGCCGGTCCGCCTTTTTGGCGAGTACTGGACCCAACCGAGCCTTTCCTTCTGGCTA  | 662  |
| Sbjct | 620  | GGTTGGCCGGTCCGCCTTTTTGGCGTGTACTGGACCCAACCGAGCCTTTCCTTCTGGCTA  | 679  |
| Query | 663  | ACCTTTCGCCCTTGTGGTGTGGCGAACCAGGACTTTTACTTTGAAAAATTAGAGTGT     | 722  |
| Sbjct | 680  | ACCTCTCGTCCTAGTGGTGTGGCGAACCAGGACTTTTACTTTGAAAAATTAGAGTGT     | 739  |
| Query | 723  | TCAAAGCAGGCCTTGTCTCGAATATATTAGCATGGAATAATAGAATAGGACGTTATGGTT  | 782  |
| Sbjct | 740  | TCAAAGCAGGCCTTGTCTCGAATATATTAGCATGGAATAATAGAATAGGACGTTATGGTT  | 799  |
| Query | 783  | CTATTTTGTGGTTTCTAGGACCATCGTAATGATTAATAGGGACGGTCGGGGGCATCAGT   | 842  |
| Sbjct | 800  | CTATTTTGTGGTTTCTAGGACCATCGTAATGATTAATAGGGACGGTCGGGGGCATCAGT   | 859  |
| Query | 843  | ATTCAGTTGTCAGAGGTGAAATTCTTGGATT-ACCTGAAGACTAACTACTGCGAAAGCAT  | 901  |
| Sbjct | 860  | ATTCAGTTGTCAGAGGTGAAATTCTTGGATTAC-TGAAGACTAACTACTGCGAAAGCAT   | 918  |
| Query | 902  | TTGCCAAGGACGTTTTCAATTAATCAAGAACGAAAGTTAGGGGATCGAAGATGATCAGATA | 961  |
| Sbjct | 919  | TTGCCAAGGACGTTTTCAATTAATCAAGAACGAAAGTTAGGGGATCGAAGATGATCAGATA | 978  |
| Query | 962  | CCGTCGTAGTCTTAACCATAAACTATGCCGACTAGGGATCGGGTGTGTTCTtttttttGA  | 1021 |
| Sbjct | 979  | CCGTCGTAGTCTTAACCATAAACTATGCCGACTAGGGATCGGGTGTGTTCTTTTTTTGA   | 1038 |
| Query | 1022 | CGCACTCGGCACCTTACGAGAAATCAAAGTCTTTGGGTTCTGGGGGAGTATGGTCGCAA   | 1081 |
| Sbjct | 1039 | CGGACTCGGCACCTTACGGGAAATCAAAGTCTTTGGGTTCTGGGGGAGTATGGTCGCAA   | 1098 |
| Query | 1082 | GGCTGAAACTTAAAGGAATTGACGGAAGGGCACCACCAGGAGTGGAGCCTGCGGCTTAAT  | 1141 |
| Sbjct | 1099 | GGCTGAAACTTAAAGGAATTGACGGAAGGGCACCACCAGGAGTGG-GACTGCGGCTTAAT  | 1157 |
| Query | 1142 | TTGACTCAACACGGGGAAACTCACCAGGTCCAGACACAATAAGGATTGACAGATTGAGAG  | 1201 |
| Sbjct | 1158 | TTGACTCAACACGGGGAAACTCACCAGGTCCAGACACAATAAGGATTGACAGATTGAGAG  | 1217 |
| Query | 1202 | CTCTTCTTGATTTTGTGGGTGGTGGTGCATGGCCGTTCTTAGTTGGTGGAGTGATTTGT   | 1261 |
| Sbjct | 1218 | CTCTTCTTGATTTTGTGGGTGGTGGTGCATGGCCGTTCTTAGTTGGTGGAGTGATTTGT   | 1277 |
| Query | 1262 | CTGCTTAATTGCGATAACGAACGAGACCTTAACCTACTAAATAGTGCTGCTAGCTTTTGC  | 1321 |
| Sbjct | 1278 | CTGCTTAATNNCGATAACGAACGAGACCTTAACCTACTAAATAGTGCTGCTAGCTTAGGC  | 1337 |
| Query | 1322 | TGGTATAGTCACTTCTTAGAGGGACTATCGATTTCAAGTCGATGGAAGTTTGGAGCAATA  | 1381 |
| Sbjct | 1338 | TGGTATAGTCACTTCTTAGAGGGACTATCGATTTCAAGTCGATGGAAGTTTGGAGCAATA  | 1397 |
| Query | 1382 | ACAGGTCTGTGATGCCCTTAGACGTTCTGGGCCGCACGCGCGCTACACTGACGGAGCCAA  | 1441 |
| Sbjct | 1398 | ACAGGTCTGTGATGCCCTTAGACGTTCTGGGCCGCACGCGCGCTACACTGACGGAGCCAG  | 1457 |
| Query | 1442 | CGAGTATTAACCTTGGCCGAGAGGTCTGGGAAATCTTGTGAAACTCCGTCGTGCTGGGGA  | 1501 |



```

Sbjct 1458 CGAGTATTAACCTTGGCCGAGAGGTCTGGGAAATCTTGTGAAACTCCGTCGTGCTGGGGA 1517
Query 1502 TAGAGCATTGTAATTATTGCTCTTCAACGAGGAATTCCTAGTAAGCGCAAGTCATCAGCT 1561
      |||
Sbjct 1518 TAGAGCATTGTAATTATTGCTCTTCAACGAGGAATTCCTAGTAAGCGCAAGTCATCAGCT 1577
Query 1562 TCGGTTGATTACGTCCCTGCCCTTTGTACACACCGCCCGTCGCTACTACCGATTGAATGG 1621
      |||
Sbjct 1578 TCGGTTGATTACGTCCCTGCCCTTTGTACACACCGCCCGTCGCTACTACCGATTGAATGG 1637
Query 1622 CTTAGTGAGGCCCTCCGGATTGGTTTAAAGAAGGGGGCAACTCCATCTTGGAACCGAAAAG 1681
      |||
Sbjct 1638 CTTAGTGAGGCCCTCCGGATTGGTTTAAAGAAGGGGGCAACTCCATCTTGGAACCGAAAAG 1697
Query 1682 CTGGTCAAACCTTGGTCATTTAGAGGAAGTAAAAGTCGTAACAAGGTTTCCGTAG 1735
      ||
Sbjct 1698 CTAGTCAAACCTTGGTCATTTAGAGGAAGTAAAAGTCGTAACAAGGTTTCCGTAG 1751

```

>dbj|AB054265.1| *Debaryomyces polymorphus* var. *africanus* gene for 18S rRNA, partial sequence, strain:JCM 7443  
Length=1752

Score = 3097 bits (1677), Expect = 0.0  
Identities = 1716/1735 (98%), Gaps = 5/1735 (0%)  
Strand=Plus/Plus

```

Query 3 GCCATGCATGTCTAAGTATAAGCAATTTATACAGTGAAACTGCGAATGGCTCATTAAATC 62
      |||
Sbjct 21 GCCATGCATGTCTAAGTATAAGCAATTTATACAGTGAAACTGCGAATGGCTCATTAAATC 80
Query 63 AGTTATCGTTTATTTGATAGTACCTTTACTACTTGGATAACCGTGGTAATTCTAGAGCTA 122
      |||
Sbjct 81 AGTTATCGTTTATTTGATAGTACCTTTACTACTTGGATAACCGTGGTAATTCTAGAGCTA 140
Query 123 ATACATGCTAAAAATCCCGACTGTTTGAAGGGATGTATTTATTAGATAAAAAATCAATG 182
      |||
Sbjct 141 ATACATGCTAAAAATCCCGACTGTTTGAAGGGATGTATTTATTAGATAAAAAATCAATG 200
Query 183 CTTTTCGGAGCTCTTTGATGATTCAATAAACTTTTCGAATCGCATGGCCTTGTGCTGGC 242
      |||
Sbjct 201 CTTTTCGGAGCTCTTTGATGATTCAATAAACTTTTCGAATCGCATGGCCTTGTGCTGGC 260
Query 243 GATGGTTCATTCAAATTTCTGCCCTATCAACTTTCGATGGTAGGATAGTGGCCTACCATG 302
      |||
Sbjct 261 GATGGTTCATTCAAATTTCTGCCCTATCAACTTTCGATGGTAGGATAGTGGCCTACCATG 320
Query 303 GTTTCAACGGGTAACGGGGAATAAGGGTTCGATTCCGGAGAGGGAGCCTGAGAAACGGCT 362
      |||
Sbjct 321 GTTTCAACGGGTAACGGGGAATAAGGGTTCGATTCCGGAGAGGGAGCCTGAGAAACGGCT 380
Query 363 ACCACATCCAAGGAAGGCAGCAGGCGCGCAAATTACCCAATCCCGACACGGGGAGGTAGT 422
      |||
Sbjct 381 ACCACATCCAAGGAAGGCAGCAGGCGCGCAAATTACCCAATCCCAATACGGGGAGGTAGT 440
Query 423 GACAATAAATAACGATACAGGGCCCTTTTCGGGTCTTGTAAATTGGAATGAGTACAATGTAA 482
      |||
Sbjct 441 GACAATAAATAACGATACAGGGCC-TTTCGGGTCTTGTAAATTGGAATGAGTACAATGTAA 499
Query 483 ATACCTTAACGAGGAACAATTGGAGGGCAAGTCTGGTGCCAGCAGCCGCGGTAATTCCAG 542
      |||
Sbjct 500 ATACCTTAACGAGGAACAATTGGAGGGCAAGTCTGGTGCCAGCAGCCGCGGTAATTCCAG 559
Query 543 CTCCAATAGCGTATATTAAGTTGTTGCAGTTAAAAGCTCGTAGTTGAACCTTGGGCTT 602

```

|       |      |                                                                   |      |
|-------|------|-------------------------------------------------------------------|------|
| Sbjct | 560  | <br>CTCCAATAGCGTATATTAAGTTGTTGCAGTTAAAAAGCTCGTAGTTGAACCTTGGGCTT   | 619  |
| Query | 603  | GGTTGGCCGGTCCGCCTTTTTGGCGAGTACTGGACCCAACCGAGCCTTTCCTTCTGGCTA      | 662  |
| Sbjct | 620  | <br>GGTTGGCCGGTCCGCCTTTTCGGCGTGTACTGGACCCAACCGAGCCTTTCCTTCTGGCTA  | 679  |
| Query | 663  | ACCTTTCGCCCTTGTGGTGTTTGGCGAACCAGGACTTTTACTTTGAAAAAATTAGAGTGT      | 722  |
| Sbjct | 680  | <br>ACCTCTCGTCCTTGTGGTGTTTGGCGAACCAGGACTTTTACTTTGAAAAAATTAGAGTGT  | 739  |
| Query | 723  | TCAAAGCAGGCCTTTGCTCGAATATATTAGCATGGAATAATAGAATAGGACGTTATGGTT      | 782  |
| Sbjct | 740  | <br>TCAAAGCAGGCCTTTGCTCGAATATATTAGCATGGAATAATAGAATAGGACGTTATGGTT  | 799  |
| Query | 783  | CTATTTTGTGGTTTCTAGGACCATCGTAATGATTAATAGGGACGGTCGGGGGCATCAGT       | 842  |
| Sbjct | 800  | <br>CTATTTTGTGGTTTCTAGGACCATCGTAATGATTAATAGGGACGGTCGGGGGCATCAGT   | 859  |
| Query | 843  | ATTCAGTTGTCAGAGGTGAAATTCTTGGATT-ACCTGAAGACTAACTACTGCGAAAGCAT      | 901  |
| Sbjct | 860  | <br>ATTCAGTTGTCAGAGGTGAAATTCTTGGATTAC-TGAAGACTAACTACTGCGAAAGCAT   | 918  |
| Query | 902  | TT-GCCAAGGACGTTTTTCATTAATCAAGAACGAAAGTTAGGGGATCGAAGATGATCAGAT     | 960  |
| Sbjct | 919  | <br>TTTGCCAAGGACGTTTTTCATTAATCAAGAACGAAAGTTAGGGGATCGAAGATGATCAGAT | 978  |
| Query | 961  | ACCGTCGTAGTCTTAACCATAAACTATGCCGACTAGGGATCGGGTGTGTTCTtttttttG      | 1020 |
| Sbjct | 979  | <br>ACCGTCGTAGTCTTAACCATAAACTATGCCGACTAGGGATCGGGTGTGTTCTTTTTTTTG  | 1038 |
| Query | 1021 | ACGCACTCGGCACCTTACGAGAAATCAAAGTCTTTGGGTTCTGGGGGAGTATGGTCGCA       | 1080 |
| Sbjct | 1039 | <br>ACGCACTCGGCACCTTACGAGAAATCAAAGTCTTTGGGTTCTGGGGGAGTATGGTCGCA   | 1098 |
| Query | 1081 | AGGCTGAAACTTAAAGGAATTGACGGAAGGGCACCACCAGGAGTGGAGCCTGCGGCTTAA      | 1140 |
| Sbjct | 1099 | <br>AGGCTGAAACTTAAAGGAATTGACGGAAGGGCACCACCAGGAGTGG-GACTGCGGCTTAA  | 1157 |
| Query | 1141 | TTTGA CTCAACACGGGGAAACTCACCAGGTCCAGACACAATAAGGATTGACAGATTGAGA     | 1200 |
| Sbjct | 1158 | <br>TTTGA CTCAACACGGGGAAACTCACCAGGTCCAGACACAATAAGGATTGACAGATTGAGA | 1217 |
| Query | 1201 | GCTCTTTCTTGATTTTGTGGGTGGTGGTGCATGGCCGTTCTTAGTTGGTGGAGTGATTTG      | 1260 |
| Sbjct | 1218 | <br>GCTCTTTCTTGATTTTGTGGGTGGTGGTGCATGGCCGTTCTTAGTTGGTGGAGTGATTTG  | 1277 |
| Query | 1261 | TCTGCTTAATTGCGATAACGAACGAGACCTTAACCTACTAAATAGTGCTGCTAGCTTTTG      | 1320 |
| Sbjct | 1278 | <br>TCTGCTTAATTNNGATAACGAACGAGACCTTAACCTACTAAATAGTGCTGCTAGCTTAGG  | 1337 |
| Query | 1321 | CTGGTATAGTCACTTCTTAGAGGGACTATCGATTTCAAGTCGATGGAAGTTTGAGGCAAT      | 1380 |
| Sbjct | 1338 | <br>CTGGTATAGTCACTTCTTAGAGGGACTATCGATTTCAAGTCGATGGAAGTTTGAGGCAAT  | 1397 |
| Query | 1381 | AACAGGTCTGTGATGCCCTTAGACGTTCTGGGCCGCACGCGCTACACTGACGGAGCCA        | 1440 |
| Sbjct | 1398 | <br>AACAGGTCTGTGATGCCCTTAGACGTTCTGGGCCGCACGCGCTACACTGACGGAGCCA    | 1457 |
| Query | 1441 | ACGAGTATTAACCTTGGCCGAGAGGTCTGGGAAATCTTGTGAAACTCCGTCGTGCTGGGG      | 1500 |
| Sbjct | 1458 | <br>GCGAGTATTAACCTTGGCCGAGAGGTCTGGGAAATCTTGTGAAACTCCGTCGTGCTGGGG  | 1517 |
| Query | 1501 | ATAGAGCATTGTAATTATTGCTCTTCAACGAGGAATTCCTAGTAAGCGCAAGTCATCAGC      | 1560 |

```

Sbjct 1518 |||||
ATAGAGCATTGTAATTATTGCTCTTCAACGAGGAATTCCTAGTAAGCGCAAGTCATCAGC 1577
Query 1561 TTGCGTTGATTACGTCCCTGCCCTTTGTACACACCGCCCGTCGCTACTACCGATTGAATG 1620
|||
Sbjct 1578 TTGCGTTGATTACGTCCCTGCCCTTTGTACACACCGCCCGTCGCTACTACCGATTGAATG 1637
Query 1621 GCTTAGTGAGGCCTCCGGATTGGTTTAAAGAAGGGGGCAACTCCATCTTGAACCGAAAA 1680
|||
Sbjct 1638 GCTTAGTGAGGCCTCCGGATTGGTTTAAAGAAGGGGGCAACTCCATCTTGAACCGAAAA 1697
Query 1681 GCTGGTCAAACCTTGGTCATTTAGAGGAAGTAAAAGTCGTAACAAGGTTTCCGTAG 1735
|||
Sbjct 1698 GCTAGTCAAACCTTGGTCATTTAGAGGAAGTAAAAGTCGTAACAAGGTTTCCGTAG 1752

```

>gb|AY520271.1| *Candida* sp. BG02-5-27-1-2-C 18S ribosomal RNA gene, partial sequence  
Length=1718

Score = 3097 bits (1677), Expect = 0.0  
Identities = 1702/1713 (99%), Gaps = 7/1713 (0%)  
Strand=Plus/Plus

```

Query 3 GCCATGCATGTCTAAGTATAAGCAATTTATACAGTGAAACTGCGAATGGCTCATTAAATC 62
|||
Sbjct 10 GCCATGCATGTCTAAGTATAAGCAATTTATACAGTGAAACTGCGAATGGCTCATTAAATC 69
Query 63 AGTTATCGTTTATTTGATAGTACCTTTACTACTTGGATAACCGTGGTAATTCTAGAGCTA 122
|||
Sbjct 70 AGTTATCGTTTATTTGATAGTACCTTTACTACTTGGATAACCGTGGTAATTCTAGAGCTA 129
Query 123 ATACATGCTAAAAATCCCGACTGTTTGAAGGGATGTATTTATTAGATAAAAAATCAATG 182
|||
Sbjct 130 ATACATGCTAAAAATCCCGACTGTTTGAAGGGATGTATTTATTAGATAAAAAATCAATG 189
Query 183 CT-TTTCGGAGCTCTTTGATGATTCAATAAATTTTCGAATCGCATGGCCTTGTGCTGG 241
|||
Sbjct 190 CTCTTT--GAGCTCTTTGATGATTCAATAAATTTTCGAATCGCATGGCCTTGTGCTGG 247
Query 242 CGATGGTTCATTCAAATTTCTGCCCTATCAACTTTCGATGGTAGGATAGTGGCCTACCAT 301
|||
Sbjct 248 CGATGGTTCATTCAAATTTCTGCCCTATCAACTTTCGATGGTAGGATAGTGGCCTACCAT 307
Query 302 GGTTCACCGGGTAACGGGGAATAAGGGTTCGATCCGGAGAGGGAGCCTGAGAAACGGC 361
|||
Sbjct 308 GGTTCACCGGGTAACGGGGAATAAGGGTTCGATCCGGAGAGGGAGCCTGAGAAACGGC 367
Query 362 TACCACATCCAAGGAAGGCAGCAGGCGCGCAAATTACCCAATCCCGACACGGGGAGGTAG 421
|||
Sbjct 368 TACCACATCCAAGGAAGGCAGCAGGCGCGCAAATTACCCAATCCCGACACGGGGAGGTAG 427
Query 422 TGACAATAAATAACGATACAGGGCCCTTTCGGGTCTTGTAATTGGAATGAGTACAATGTA 481
|||
Sbjct 428 TGACAATAAATAACGATACAGGGCCCTTTCGGGTCTTGTAATTGGAATGAGTACAATGTA 487
Query 482 AATACCTTAACGAGGAACAATTGGAGGGCAAGTCTGGTGCCAGCAGCCGCGTAATTCCA 541
|||
Sbjct 488 AATACCTTAACGAGGAACAATTGGAGGGCAAGTCTGGTGCCAGCAGCCGCGTAATTCCA 547
Query 542 GCTCCAATAGCGTATATTAAGTTGTTGCAGTTAAAAAGCTCGTAGTTGAACCTTGGGCT 601
|||
Sbjct 548 GCTCCAATAGCGTATATTAAGTTGTTGCAGTTAAAAAGCTCGTAGTTGAACCTTGGGTT 607

```



```

Query 1560 CTTGCGTTGATTACGTCCCTGCCCTTTGTACACACCGCCCGTCGCTACTACCGATTGAAT 1619
          |||
Sbjct 1566 CTTGCGTTGATTACGTCCCTGCCCTTTGTACACACCGCCCGTCGCTACTACCGATTGAAT 1625

Query 1620 GGCTTAGTGAGGCCCTCCGGATTGGTTTAAAGAAGGGGGCAACTCCATCTTGGAACCGAAA 1679
          |||
Sbjct 1626 GGCTTAGTGAGGCCCTCCGGATTGGTTTAAAGAAGGGGGCAACTCCATCTTGGAACCGAAA 1685

Query 1680 AGCTGGTCAAACCTGGTCATTTAGAGGAAGTAA 1712
          |||
Sbjct 1686 AGCTGGTCAAACCTGGTCATTTAGAGGAAGTAA 1718

```

>dbj|AB054262.1| *Debaryomyces occidentalis* gene for 18S rRNA, partial sequence, strain:JCM 8123  
Length=1754

Score = 3096 bits (1676), Expect = 0.0  
Identities = 1716/1736 (98%), Gaps = 5/1736 (0%)  
Strand=Plus/Plus

```

Query 3 GCCATGCATGTCTAAGTATAAGCAATTTATACAGTGAAACTGCGAATGGCTCATTAAATC 62
        |||
Sbjct 21 GCCATGCATGTCTAAGTATAAGCAATTTATACAGTGAAACTGCGAATGGCTCATTAAATC 80

Query 63 AGTTATCGTTTATTTGATAGTACCTTTACTACTTGGATAACCGTGGTAATTCTAGAGCTA 122
        |||
Sbjct 81 AGTTATCGTTTATTTGATAGTACCTTTACTACTTGGATAACCGTGGTAATTCTAGAGCTA 140

Query 123 ATACATGCTAAAAATCCCGACTGTTTGGGAAGGGATGTATTTATTAGATAAAAAATCAATG 182
        |||
Sbjct 141 ATACATGCTAAAAATCCCGACTGTTTGGGAAGGGATGTATTTATTAGATAAAAAATCAATG 200

Query 183 CTTTTCGGAGCTCTTTGATGATTCAATAAACTTTTCGAATCGCATGGCCTTGTGCTGGC 242
        |||
Sbjct 201 CTCTTCGGAGCTCTTTGATGATTCAATAAACTTTTCGAATCGCATGGCCTTGTGCTGGC 260

Query 243 GATGGTTCATTCAAATTTCTGCCCTATCAACTTTTCGATGGTAGGATAGTGGCCTACCATG 302
        |||
Sbjct 261 GATGGTTCATTCAAATTTCTGCCCTATCAACTTTTCGATGGTAGGATAGTGGCCTACCATG 320

Query 303 GTTTCAACGGGTAACGGGGAATAAGGGTTCGATTCCGGAGAGGGAGCCTGAGAAACGGCT 362
        |||
Sbjct 321 GTTTCAACGGGTAACGGGGAATAAGGGTTCGATTCCGGAGAGGGAGCCTGAGAAACGGCT 380

Query 363 ACCACATCCAAGGAAGGCAGCAGGCGCGCAAATTACCCAATCCCGACACGGGGAGGTAGT 422
        |||
Sbjct 381 ACCACATCCAAGGAAGGCAGCAGGCGCGCAAATTACCCAATCCCGACACGGGGAGGTAGT 440

Query 423 GACAATAAATAACGATACAGGGCCCTTTTCGGGTCTTGTAAATTGGAATGAGTACAATGTAA 482
        |||
Sbjct 441 GACAATAAATAACGATACAGGGCCCTTTTCGGGTCTTGTAAATTGGAATGAGTACAATGTAA 500

Query 483 ATACCTTAACGAGGAACAATTGGAGGGCAAGTCTGGTGCCAGCAGCCGCGGTAATTCCAG 542
        |||
Sbjct 501 ATACCTTAACGAGGAACAATTGGAGGGCAAGTCTGGTGCCAGCAGCCGCGGTAATTCCAG 560

Query 543 CTCCAATAGCGTATATTAAGTTGTTGCAGTTAAAAAGCTCGTAGTTGAACCTTGGGCTT 602
        |||
Sbjct 561 CTCCAATAGCGTATATTAAGTTGTTGCAGTTAAAAAGCTCGTAGTTGAACCTTGGGCTT 620

Query 603 GGTTGGCCGGTCCGCCTTTTTGGCGAGTACTGGACCCAACCGAGCCTTTCCTTCTGGCTA 662
        |||
Sbjct 621 GGTTGGCCGGTCCGCCTTTTTGGCGAGTACTGGACCCAACCGAGCCTTTCCTTCTGGCTA 680

```



```

Query 1620 GGCTTAGTGAGGCCCTCCGGATTGGTTTAAAGAAGGGGGCAACTCCATCTTGGAACCGAAA 1679
          |||
Sbjct 1639 GGCTTAGTGAGGCCCTCCGGATTGGTTTAAAGAAGGGGGCAACTCCTTCTTGGAACCGAAA 1698

Query 1680 AGCTGGTCAAACCTTGGTCATTTAGAGGAAGTAAAAGTCGTAACAAGGTTTCCGTAG 1735
          |||
Sbjct 1699 AGCTGGTCAAACCTTGGTCATTTAGAGGAAGTAAAAGTCGTAACAAGGTTTCCGTAG 1754

```

>gb|GU570441.1| *Candida* sp. NN-2010a 18S ribosomal RNA gene, partial sequence  
Length=1710

Score = 3092 bits (1674), Expect = 0.0  
Identities = 1701/1713 (99%), Gaps = 5/1713 (0%)  
Strand=Plus/Plus

```

Query 18 GTATAAGCAATTTATACAGTGAAACTGCGAATGGCTCATTAAATCAGTTATCGTTTATTT 77
          |||
Sbjct 1 GTATAAGCAATTTATACAGTGAAACTGCGAATGGCTCATTAAATCAGTTATCGTTTATTT 60

Query 78 GATAGTACCTTTACTACTTGGATAAACCGTGGTAATTCTAGAGCTAATACATGCTAAAAAT 137
          |||
Sbjct 61 GATAGTACCTTTACTACTTGGATAAACCGTGGTAATTCTAGAGCTAATACATGCTAAAAAT 120

Query 138 CCCGACTGTTTGGGAAGGGATGTATTTATTAGATAAAAAATCAATGCT-TTTCGGAGCTCT 196
          |||
Sbjct 121 CCCGACTGTTTGGGAAGGGATGTATTTATTAGATAAAAAATCAATGCTCTTT--GAGCTCT 178

Query 197 TTGATGATTTCATAATAACTTTTCGAATCGCATGGCCTTGTGCTGGCGATGGTTCATTCAA 256
          |||
Sbjct 179 TTGATGATTTCATAATAACTTTTCGAATCGCATGGCCTTGTGCTGGCGATGGTTCATTCAA 238

Query 257 ATTTCTGCCCTATCAACTTTCGATGGTAGGATAGTGGCCTACCATGGTTTCAACGGGTAA 316
          |||
Sbjct 239 ATTTCTGCCCTATCAACTTTCGATGGTAGGATAGTGGCCTACCATGGTTTCAACGGGTAA 298

Query 317 CGGGGAATAAGGTTTCGATTCCGGAGAGGGAGCCTGAGAAACGGCTACCACATCCAAGGA 376
          |||
Sbjct 299 CGGGGAATAAGGTTTCGATTCCGGAGAGGGAGCCTGAGAAACGGCTACCACATCCAAGGA 358

Query 377 AGGCAGCAGGCGCGCAAATTACCCAATCCCGACACGGGGAGGTAGTGACAATAAATAACG 436
          |||
Sbjct 359 AGGCAGCAGGCGCGCAAATTACCCAATCCCGACACGGGGAGGTAGTGACAATACATAACG 418

Query 437 ATACAGGGCCCTTTCGGGTCTTGTAATTGGAATGAGTACAATGTAAATACCTTAACGAGG 496
          |||
Sbjct 419 ATACAGGGCCCTTTCGGGTCTTGTAATTGGAATGAGTACAATGTAAATACCTTAACGAGG 478

Query 497 AACAATTGGAGGGCAAGTCTGGTGCCAGCAGCCGCGTAATTCCAGCTCCAATAGCGTAT 556
          |||
Sbjct 479 AACAATTGGAGGGCAAGTCTGGTGCCAGCAGCCGCGTAATTCCAGCTCCAATAGCGTAT 538

Query 557 ATTAAAGTTGTTGCAGTTAAAAAGCTCGTAGTTGAACTTGGGCTTGGTTGGCCGGTCCG 616
          |||
Sbjct 539 ATTAAAGTTGTTGCAGTTAAAAAGCTCGTAGTTGAACTTGGGCTTGGTTGGCCGGTCCG 598

Query 617 CCTTTTTGGCGAGTACTGGACCCAACCGAGCCTTTCCTTCTGGCTAACCTTTCGCCCTTG 676
          |||
Sbjct 599 CCTTTTTGGCGAGTACTGGACCCAACCGAGCCTTTCCTTCTGGCTAACCTTTCGCCCTTG 658

Query 677 TGGTGTTTGGCGAACCAGGACTTTTACTTTGAAAAAATTAGAGTGTTCAAAGCAGGCCTT 736
          |||
Sbjct 659 TGGTGTTTGGCGAACCAGGACTTTTACTTTGAAAAAATTAGAGTGTTCAAAGCAGGCCTT 718

```





Query 1696 TCATTTAGAGGAAGTAAAAGTCGTAACAAGGTT 1728  
|||||  
Sbjct 1678 TCATTTAGAGGAAGTAAAAGTCGTAACAAGGTT 1710

>emb|AJ508276.1| Pichia caribbica partial 18S rRNA gene, strain CBS 5265T  
Length=1710

Score = 3092 bits (1674), Expect = 0.0  
Identities = 1701/1713 (99%), Gaps = 5/1713 (0%)  
Strand=Plus/Plus

Query 18 GTATAAGCAATTTATACAGTGAAACTGCGAATGGCTCATTAAATCAGTTATCGTTTATTT 77  
|||||  
Sbjct 1 GTATAAGCAATTTATACAGTGAAACTGCGAATGGCTCATTAAATCAGTTATCGTTTATTT 60

Query 78 GATAGTACCTTTACTACTTGGATAAACCGTGGTAATTCTAGAGCTAATACATGCTAAAAAT 137  
|||||  
Sbjct 61 GATAGTACCTTTACTACTTGGATAAACCGTGGTAATTCTAGAGCTAATACATGCTAAAAAT 120

Query 138 CCCGACTGTTTGGGAAGGGATGTATTTATTAGATAAAAAATCAATGCT-TTTCGGAGCTCT 196  
|||||  
Sbjct 121 CCCGACTGTTTGGGAAGGGATGTATTTATTAGATAAAAAATCAATGCTCTTT--GAGCTCT 178

Query 197 TTGATGATTTCATAATAACTTTTCGAATCGCATGGCCTTGTGCTGGCGATGGTTCATTCAA 256  
|||||  
Sbjct 179 TTGATGATTTCATAATAACTTTTCGAATCGCATGGCCTTGTGCTGGCGATGGTTCATTCAA 238

Query 257 ATTTCTGCCCTATCAACTTTTCGATGGTAGGATAGTGGCCTACCATGGTTTCAACGGGTAA 316  
|||||  
Sbjct 239 ATTTCTGCCCTATCAACTTTTCGATGGTAGGATAGTGGCCTACCATGGTTTCAACGGGTAA 298

Query 317 CGGGGAATAAGGGTTCGATTCCGGAGAGGGAGCCTGAGAAACGGCTACCACATCCAAGGA 376  
|||||  
Sbjct 299 CGGGGAATAAGGGTTCGATTCCGGAGAGGGAGCCTGAGAAACGGCTACCACATCCAAGGA 358

Query 377 AGGCAGCAGGCGCGCAAATTACCCAATCCCGACACGGGGAGGTAGTGACAATAAATAACG 436  
|||||  
Sbjct 359 AGGCAGCAGGCGCGCAAATTACCCAATCCCGACACGGGGAGGTAGTGACAATACATAACG 418

Query 437 ATACAGGGCCCTTTCGGGTCTTGTAATTGGAATGAGTACAATGTAAATACCTTAACGAGG 496  
|||||  
Sbjct 419 ATACAGGGCCCTTTCGGGTCTTGTAATTGGAATGAGTACAATGTAAATACCTTAACGAGG 478

Query 497 AACCAATTGGAGGGCAAGTCTGGTGCCAGCAGCCGCGTAATTCCAGCTCCAATAGCGTAT 556  
|||||  
Sbjct 479 AACCAATTGGAGGGCAAGTCTGGTGCCAGCAGCCGCGTAATTCCAGCTCCAATAGCGTAT 538

Query 557 ATTAAAGTTGTTGCAGTTAAAAAGCTCGTAGTTGAACTTTGGGCTTGGTTGGCCGGTCCG 616  
|||||  
Sbjct 539 ATTAAAGTTGTTGCAGTTAAAAAGCTCGTAGTTGAACTTTGGGCTTGGTTGGCCGGTCCG 598

Query 617 CCTTTTTGGCGAGTACTGGACCCAACCGAGCCTTTCCTTCTGGCTAACCTTTCGCCCTTG 676  
|||||  
Sbjct 599 CCTTTTTGGCGAGTACTGGACCCAACCGAGCCTTTCCTTCTGGCTAACCTTTCGCCCTTG 658

Query 677 TGGTGTGTTGGCGAACCAGGACTTTTACTTTGAAAAAATTAGAGTGTTCAAAGCAGGCCTT 736  
|||||  
Sbjct 659 TGGTGTGTTGGCGAACCAGGACTTTTACTTTGAAAAAATTAGAGTGTTCAAAGCAGGCCTT 718

Query 737 TGCTCGAATATATTAGCATGGAATAATAGAATAGGACGTTATGGTTCTATTTTGTGGTT 796  
|||||  
Sbjct 719 TGCTCGAATATATTAGCATGGAATAATAGAATAGGACGTTATGGTTCTATTTTGTGGTT 778





|       |      |                                                               |      |
|-------|------|---------------------------------------------------------------|------|
| Sbjct | 788  | TCTATTTTGTGGTTTCTAGGACCATCGTAATGATTAATAGGGACGGTCGGGGGCATCAG   | 847  |
| Query | 842  | TATTCAGTTGTCAGAGGTGAAATTCTTGGA-TTACCTGAAGACTAACTACTGCGAAAGCA  | 900  |
| Sbjct | 848  | TATTCAGTTGTCAGAGGTGAAATTCTTAGATTTA-CTGAAGACTAACTACTGCGAAAGCA  | 906  |
| Query | 901  | TTTGCCAAGGACGTTTTTCATTAATCAAGAACGAAAGTTAGGGGATCGAAGATGATCAGAT | 960  |
| Sbjct | 907  | TTTGCCAAGGACGTTTTTCATTAATCAAGAACGAAAGTTAGGGGATCGAAGATGATCAGAT | 966  |
| Query | 961  | ACCGTCGTAGTCTTAACCATAAACTATGCCGACTAGGGATCGGGTGTGTTCTtttttttG  | 1020 |
| Sbjct | 967  | ACCGTCGTAGTCTTAACCATAAACTATGCCGACTAGGGATCGGGTGTGTTCTTTTTTTTG  | 1026 |
| Query | 1021 | ACGCACTCGGCACCTTACGAGAAATCAAAGTCTTTGGGTTCTGGGGGAGTATGGTCGCA   | 1080 |
| Sbjct | 1027 | ACGCACTCGGCACCTTACGAGAAATCAAAGTCTTTGGGTTCTGGGGGAGTATGGTCGCA   | 1086 |
| Query | 1081 | AGGCTGAAACTTAAAGGAATTGACGGAAGGGCACCACCAGGAGTGGAGCCTGCGGCTTAA  | 1140 |
| Sbjct | 1087 | AGGCTGAAACTTAAAGGAATTGACGGAAGGGCACCACCAGGAGTGGAGCCTGCGGCTTAA  | 1146 |
| Query | 1141 | TTTGACTCAACACGGGGAAACTCACCAGGTCCAGACACAATAAGGATTGACAGATTGAGA  | 1200 |
| Sbjct | 1147 | TTTGACTCAACACGGGGAAACTCACCAGGTCCAGACACAATAAGGATTGACAGATTGAGA  | 1206 |
| Query | 1201 | GCTCTTTCTTGATTTTGTGGGTGGTGGTGCATGGCCGTTCTTAGTTGGTGGAGTGATTTG  | 1260 |
| Sbjct | 1207 | GCTCTTTCTTGATTTTGTGGGTGGTGGTGCATGGCCGTTCTTAGTTGGTGGAGTGATTTG  | 1266 |
| Query | 1261 | TCTGCTTAATTGCGATAACGAACGAGACCTTAACCTACTAAATAGTGCTGCTAGCTTTTG  | 1320 |
| Sbjct | 1267 | TCTGCTTAATTGCGATAACGAACGAGACCTTAACCTACTAAATAGTGCTGCTAGCTTTTG  | 1326 |
| Query | 1321 | CTGGTATAGTCACTTCTTAGAGGGACTATCGATTTCAAGTCGATGGAAGTTTGAGGCAAT  | 1380 |
| Sbjct | 1327 | CTGGTATAGTCACTTCTTAGAGGGACTATCGATTTCAAGTCGATGGAAGTTTGAGGCAAT  | 1386 |
| Query | 1381 | AACAGGTCTGTGATGCCCTTAGACGTTCTGGGCCGCACGCGCTACACTGACGGAGCCA    | 1440 |
| Sbjct | 1387 | AACAGGTCTGTGATGCCCTTAGACGTTCTGGGCCGCACGCGCTACACTGACGGAGCCA    | 1446 |
| Query | 1441 | ACGAGTATTAACCTTGGCCGAGAGGTCTGGGAAATCTTGTGAAACTCCGTCGTGCTGGGG  | 1500 |
| Sbjct | 1447 | GCGAGTATTAACCTTGGCCGAGAGGTCTGGGAAATCTTGTGAAACTCCGTCGTGCTGGGG  | 1506 |
| Query | 1501 | ATAGAGCATTGTAATTATTGCTCTTCAACGAGGAATTCCTAGTAAGCGCAAGTCATCAGC  | 1560 |
| Sbjct | 1507 | ATAGAGCATTGTAATTATTGCTCTTCAACGAGGAATTCCTAGTAAGCGCAAGTCATCAGC  | 1566 |
| Query | 1561 | TTGCGTTGATTACGTCCCTGCCCTTTGTACACACCGCCCGTCGCTACTACCGATTGAATG  | 1620 |
| Sbjct | 1567 | TTGCGTTGATTACGTCCCTGCCCTTTGTACACACCGCCCGTCGCTACTACCGATTGAATG  | 1626 |
| Query | 1621 | GCTTAGTGAGGCCTCCGGATTGGTTTAAAGAAGGGGGCAACTCCATCTTGAACCGAAAA   | 1680 |
| Sbjct | 1627 | GCTTAGTGAGGCCTCCGGATTGGTTTAAAGAAGGGGGCAACTCCATCTTGAACCGAAAA   | 1686 |
| Query | 1681 | GCTGGTCAAACCTGGTCAATTTAGAGGAAG                                | 1709 |
| Sbjct | 1687 | GCTGGTCAAACCTGGTCAATTTAGAGGAAG                                | 1715 |



|       |      |                                                                   |      |
|-------|------|-------------------------------------------------------------------|------|
| Sbjct | 848  | <br>ATTCAGTTGTCAGAGGTGAAATTCTTGGATTTA-CTGAAGACTAACTACTGCGAAAGCAT  | 906  |
| Query | 902  | TTGCCAAGGACGTTTTTCATTAATCAAGAACGAAAGTTAGGGGATCGAAGATGATCAGATA     | 961  |
| Sbjct | 907  | <br>TTGCCAAGGACGTTTTTCATTAATCAAGAACGAAAGTTAGGGGATCGAAGATGATCAGATA | 966  |
| Query | 962  | CCGTCGTAGTCTTAACCATAAACTATGCCGACTAGGGATCGGGTGTGTTCTtttttttGA      | 1021 |
| Sbjct | 967  | <br>CCGTCGTAGTCTTAACCATAAACTATGCCGACTAGGGATCGGGTGTGTTCTTTTTTTGA   | 1026 |
| Query | 1022 | CGCACTCGGCACCTTACGAGAAATCAAAGTCTTTGGGTTCTGGGGGAGTATGGTCGCAA       | 1081 |
| Sbjct | 1027 | <br>CGCACTCGGCACCTTACGAGAAATCAAAGTCTTTGGGTTCTGGGGGAGTATGGTCGCAA   | 1086 |
| Query | 1082 | GGCTGAAACTTAAAGGAATTGACGGAAGGGCACCACCAGGAGTGGAGCCTGCGGCTTAAT      | 1141 |
| Sbjct | 1087 | <br>GGCTGAAACTTAAAGGAATTGACGGAAGGGCACCACCAGGAGTGGAGCCTGCGGCTTAAT  | 1146 |
| Query | 1142 | TTGACTCAACACGGGGAAACTCACCAGGTCCAGACACAATAAGGATTGACAGATTGAGAG      | 1201 |
| Sbjct | 1147 | <br>TTGACTCAACACGGGGAAACTCACCAGGTCCAGACACAATAAGGATTGACAGATTGAGAG  | 1206 |
| Query | 1202 | CTCTTTCTTGATTTTGTGGGTGGTGGTGCATGGCCGTTCTTAGTTGGTGGAGTGATTTGT      | 1261 |
| Sbjct | 1207 | <br>CTCTTTCTTGATTTTGTGGGTGGTGGTGCATGGCCGTTCTTAGTTGGTGGAGTGATTTGT  | 1266 |
| Query | 1262 | CTGCTTAATTGCGATAACGAACGAGACCTTAACCTACTAAATAGTGCTGCTAGCTTTTGC      | 1321 |
| Sbjct | 1267 | <br>CTGCTTAATTGCGATAACGAACGAGACCTTAACCTACTAAATAGTGCTGCTAGCTTTTGC  | 1326 |
| Query | 1322 | TGGTATAGTCACTTCTTAGAGGGACTATCGATTTCAAGTCGATGGAAGTTTGAGGCAATA      | 1381 |
| Sbjct | 1327 | <br>TGGTATAGTCACTTCTTAGAGGGACTATCGATTTCAAGTCGATGGAAGTTTGAGGCAATA  | 1386 |
| Query | 1382 | ACAGGTCTGTGATGCCCTTAGACGTTCTGGGCCGCACGCGCGCTACACTGACGGAGCCAA      | 1441 |
| Sbjct | 1387 | <br>ACAGGTCTGTGATGCCCTTAGACGTTCTGGGCCGCACGCGCGCTACACTGACGGAGCCAG  | 1446 |
| Query | 1442 | CGAGTAT-TAACCTTGGCCGAGAGGTCTGGGAAATCTTGTGAAACTCCGTCGTGCTGGGG      | 1500 |
| Sbjct | 1447 | <br>CGAGT-TCTAACCTTGGCCGAGAGGTCTGGGTAATCTTGTGAAACTCCGTCGTGCTGGGG  | 1505 |
| Query | 1501 | ATAGAGCATTGTAATTATTGCTCTTCAACGAGGAATTCCTAGTAAGCGCAAGTCATCAGC      | 1560 |
| Sbjct | 1506 | <br>ATAGAGCATTGTAATTATTGCTCTTCAACGAGGAATTCCTAGTAAGCGCAAGTCATCAGC  | 1565 |
| Query | 1561 | TTGCGTTGATTACGTCCCTGCCCTTTGTACACACCGCCCGTCGCTACTACCGATTGAATG      | 1620 |
| Sbjct | 1566 | <br>TTGCGTTGATTACGTCCCTGCCCTTTGTACACACCGCCCGTCGCTACTACCGATTGAATG  | 1625 |
| Query | 1621 | GCTTAGTGAGGCCTCCGGATTGGTTTAAAGAAGGGGGCAACTCCATCTTGAACCGAAAA       | 1680 |
| Sbjct | 1626 | <br>GCTTAGTGAGGCCTCCGGATTGGTTTAAAGAAGGGGGCAACTCCATCTTGAACCGAAAA   | 1685 |
| Query | 1681 | GCTGGTCAAACCTGGTCAATTTAGAGGAAGTAAAAG                              | 1715 |
| Sbjct | 1686 | <br>GCTAGTCAAACCTGGTCAATTTAGAGGAAGTAAAAG                          | 1720 |

>dbj|AB054258.1| Debaryomyces etchellsii gene for 18S rRNA, partial sequence,  
strain:JCM 3656  
Length=1752



```

Query 900 ATTTGCCAAGGACGTTTTTCATTAATCAAGAACGAAAGTTAGGGGATCGAAGATGATCAGA 959
          |||
Sbjct 918 ATTTGCCAAGGACGTTTTTCATTAATCAAGAACGAAAGTTAGGGGATCGAAGATGATCAGA 977

Query 960 TACCGTCGTAGTCTTAACCATAAACTATGCCGACTAGGGATCGGGTGTGTTCTttttttt 1019
          |||
Sbjct 978 TACCGTCGTAGTCTTAACCATAAACTATGCCGACTAGGGATCGGGTGTGTTCTTTTTTTT 1037

Query 1020 GACGCACTCGGCACCTTACGAGAAATCAAAGTCTTTGGGTTCTGGGGGAGTATGGTCCG 1079
          |||
Sbjct 1038 GACGCACTCGGCACCTTACGAGAAATCAAAGTCTTTGGGTTCTGGGGGAGTATGGTCCG 1097

Query 1080 AAGGCTGAAACTTAAAGGAATTGACGGAAGGGCACCACCAGGAGTGGAGCCTGCGGCTTA 1139
          |||
Sbjct 1098 AAGGCTGAAACTTAAAGGAATTGACGGAAGGGCACCACCAGGAGTGG-GACTGCGGCTTA 1156

Query 1140 ATTTGACTCAACACGGGGAAACTCACCAGGTCCAGACACAATAAGGATTGACAGATTGAG 1199
          |||
Sbjct 1157 ATTTGACTCAACACGGGGAAACTCACCAGGTCCAGACACAATAAGGATTGACAGATTGAG 1216

Query 1200 AGCTCTTTCTTGATTTTGTGGGTGGTGGTGCATGGCCGTTCTTAGTTGGTGGAGTGATTT 1259
          |||
Sbjct 1217 AGCTCTTTCTTGATTTTGTGGGTGGTGGTGCATGGCCGTTCTTAGTTGGTGGAGTGATTT 1276

Query 1260 GTCTGCTTAATTGCGATAACGAACGAGACCTTAACCTACTAAATAGTGCTGCTAGCTTTT 1319
          |||
Sbjct 1277 GTCTGCTTAATTNNGATAACGAACGAGACCTTAACCTACTAAATAGTGCTGCTAGCTTTT 1336

Query 1320 GCTGGTATAGTCACCTTCTTAGAGGGACTATCGATTTCAAGTCGATGGAAGTTTGAGGCAA 1379
          |||
Sbjct 1337 GCTGGTATAGTCACCTTCTTAGAGGGACTATCGATTTCAAGTCGATGGAAGTTTGAGGCAA 1396

Query 1380 TAACAGGTCTGTGATGCCCTTAGACGTTCTGGGCCGCACGCGCGCTACACTGACGGAGCC 1439
          |||
Sbjct 1397 TAACAGGTCTGTGATGCCCTTAGACGTTCTGGGCCGCACGCGCGCTACACTGACGGAGCC 1456

Query 1440 AACGAGTATTAACCTTGCCGAGAGGTCTGGGAAATCTTGTGAAACTCCGTCGTGCTGGG 1499
          |||
Sbjct 1457 AGCGAGTATTAACCTTGCCGAGAGGTCTGGGAAATCTTGTGAAACTCCGTCGTGCTGGG 1516

Query 1500 GATAGAGCATTGTAATTATTGCTCTTCAACGAGGAATTCTAGTAAGCGCAAGTCATCAG 1559
          |||
Sbjct 1517 GATAGAGCATTGTAATTATTGCTCTTCAACGAGGAATTCTAGTAAGCGCAAGTCATCAG 1576

Query 1560 CTTGCGTTGATTACGTCCCTGCCCTTTGTACACACCGCCCGTCGCTACTACCGATTGAAT 1619
          |||
Sbjct 1577 CTTGCGTTGATTACGTCCCTGCCCTTTGTACACACCGCCCGTCGCTACTACCGATTGAAT 1636

Query 1620 GGCTTAGTGAGGCCTCCGATTGGTTTAAAGAAGGGGGCAACTCCATCTTGGAACCGAAA 1679
          |||
Sbjct 1637 GGCTTAGTGAGGCCTCCGATTGGTTTAAAGAAGGGGGCAACTCCATCTTGGAACCGAAA 1696

Query 1680 AGCTGGTCAAACCTGGTCAATTTAGAGGAAGTAAAAGTCGTAACAAGGTTTCCGTAG 1735
          |||
Sbjct 1697 AGTTGGTCAAACCTGGTCAATTTAGAGGAAGTAAAAGTCGTAACAAGGTTTCCGTAG 1752

```

>gb|AY227020.1| *Pichia guilliermondii* strain CCO 8 18S ribosomal RNA gene, partial sequence  
Length=1701

Score = 3086 bits (1671), Expect = 0.0  
Identities = 1694/1704 (99%), Gaps = 5/1704 (0%)  
Strand=Plus/Plus





```

Query 982  AACTATGCCGACTAGGGATCGGGTGTGTTCTtttttttGACGCACTCGGCACCTTACGAG 1041
          |||
Sbjct 958  AACTATGCCGACTAGGGATCGGGTGTGTTCTTTTTTTGACGCACTCGGCACCTTACGAG 1017

Query 1042 AAATCAAAGTCTTTGGGTCTGGGGGAGTATGGTCGCAAGGCTGAAACTTAAAGGAATT 1101
          |||
Sbjct 1018 AAATCAAAGTCTTTGGGTCTGGGGGAGTATGGTCGCAAGGCTGAAACTTAAAGGAATT 1077

Query 1102  GACGGAAGGGCACCACCAGGAGTGGAGCCTGCGGCTTAATTTGACTCAACACGGGGAAAC 1161
          |||
Sbjct 1078  GACGGAAGGGCACCACCAGGAGTGGAGCCTGCGGCTTAATTTGACTCAACACGGGGAAAC 1137

Query 1162  TCACCAGGTCCAGACACAATAAGGATTGACAGATTGAGAGCTCTTTCTTGATTTTGTGGG 1221
          |||
Sbjct 1138  TCACCAGGTCCAGACACAATAAGGATTGACAGATTGAGAGCTCTTTCTTGATTTTGTGGG 1197

Query 1222  TGGTGGTGCATGGCCGTTCTTAGTTGGTGGAGTGATTTGTCTGCTTAATTGCGATAACGA 1281
          |||
Sbjct 1198  TGGTGGTGCATGGCCGTTCTTAGTTGGTGGAGTGATTTGTCTGCTTAATTGCGATAACGA 1257

Query 1282  ACGAGACCTTAACCTACTAAATAGTGCTGCTAGCTTTTGCTGGTATAGTCACTTCTTAGA 1341
          |||
Sbjct 1258  ACGAGACCTTAACCTACTAAATAGTGCTGCTAGCTTTTGCTGGTATAGTCACTTCTTAGA 1317

Query 1342  GGGACTATCGATTTCAAGTCGATGGAAGTTTGAGGCAATAACAGGTCTGTGATGCCCTTA 1401
          |||
Sbjct 1318  GGGACTATCGATTTCAAGTCGATGGAAGTTTGAGGCAATAACAGGTCTGTGATGCCCTTA 1377

Query 1402  GACGTTCTGGGCCGCACGCGCGCTACACTGACGGAGCCAACGAGTATTAACCTTGGCCGA 1461
          |||
Sbjct 1378  GACGTTCTGGGCCGCACGCGCGCTACACTGACGGAGCCAACGAGTATTAACCTTGGCCGA 1437

Query 1462  GAGGTCTGGGAAATCTTGTGAAACTCCGTCGTGCTGGGGATAGAGCATTGTAATTATTGC 1521
          |||
Sbjct 1438  GAGGTCTGGGAAATCTTGTGAAACTCCGTCGTGCTGGGGATAGAGCATTGTAATTATTGC 1497

Query 1522  TCTTCAACGAGGAATTCCTAGTAAGCGCAAGTCATCAGCTTGCGTTGATTACGTCCCTGC 1581
          |||
Sbjct 1498  TCTTCAACGAGGAATTCCTAGTAAGCGCAAGTCATCAGCTTGCGTTGATTACGTCCCTGC 1557

Query 1582  CCTTTGTACACACCGCCCGTCGCTACTACCGATTGAATGGCTTAGTGAGGCCTCCGGATT 1641
          |||
Sbjct 1558  CCTTTGTACACACCGCCCGTCGCTACTACCGATTGAATGGCTTAGTGAGGCCTCCGGATT 1617

Query 1642  GGTTTAAAGAAGGGGGCAACTCCATCTTGAACCGAAAAGCTGGTCAAACCTGGTCATTT 1701
          |||
Sbjct 1618  GGTTTAAAGAAGGGGGCAACTCCATCTTGAACCGAAAAGCTGGTCAAACCTGGTCATTT 1677

Query 1702  AGAGGAAGTAAAAGTCGTAACAAG 1725
          |||
Sbjct 1678  AGAGGAAGTAAAAGTCGTAACAAG 1701

```

```

>gb|AY520226.1| Candida sp. BG02-5-23-003D-5 18S ribosomal RNA gene, partial
sequence
Length=1740

```

```

Score = 3086 bits (1671), Expect = 0.0
Identities = 1716/1736 (98%), Gaps = 9/1736 (0%)
Strand=Plus/Plus

```

```

Query 3      GCCATGCATGTCTAAGTATAAGCAATTTATACAGTGAAACTGCGAATGGCTCATTAAATC 62
          |||

```

|       |     |                                                               |      |
|-------|-----|---------------------------------------------------------------|------|
| Sbjct | 10  | GCCATGCATGTCTAAGTATAAGCAATTTATACAGTGAAACTGCGAATGGCTCATTAAATC  | 69   |
| Query | 63  | AGTTATCGTTTATTTGATAGTACCTTTACTACTTGGATAACCGTGGTAATTCTAGAGCTA  | 122  |
| Sbjct | 70  | AGTTATCGTTTATTTGATAGTACCTTTACTACTTGGATAACCGTGGTAATTCTAGAGCTA  | 129  |
| Query | 123 | ATACATGCTAAAAATCCCGACTGTTTGGGAAGGGATGTATTTATTAGATAAAAAATCAATG | 182  |
| Sbjct | 130 | ATACATGCTAAAAATCCCGACTGTTTGGGAAGGGATGTATTTATTAGATAAAAAATCAACG | 189  |
| Query | 183 | CT-TTTCGGAGCTCTTTGATGATTCAATAAATCTTTTCGAATCGCATGGCCTTGTGCTGG  | 241  |
| Sbjct | 190 | CTCTTT--GAGCTCTTTGATGATTCAATAAATCTTTTCGAATCGCATGGCCTTGTGCTGG  | 247  |
| Query | 242 | CGATGGTTCATTCAAATTTCTGCCCTATCAACTTTTCGATGGTAGGATAGTGGCCTACCAT | 301  |
| Sbjct | 248 | CGATGGTTCATTCAAATTTCTGCCCTATCAACTTTTCGATGGTAGGATAGTGGCCTACCAT | 307  |
| Query | 302 | GGTTTCAACGGGTAACGGGGAATAAGGGTTCGATTCCGGAGAGGGAGCCTGAGAAACGGC  | 361  |
| Sbjct | 308 | GGTTTCAACGGGTAACGGGGAATAAGGGTTCGATTCCGGAGAGGGAGCCTGAGAAACGGC  | 367  |
| Query | 362 | TACCACATCCAAGGAAGGCAGCAGGCGCGCAAATTACCCAATCCCGACACGGGGAGGTAG  | 421  |
| Sbjct | 368 | TACCACATCCAAGGAAGGCAGCAGGCGCGCAAATTACCCAATCCCGACACGGGGAGGTAG  | 427  |
| Query | 422 | TGACAATAAATAACGATACAGGGCCCTTTTCGGGTCTTGTAATTGGAATGAGTACAATGTA | 481  |
| Sbjct | 428 | TGACAATAAATAACGATACAGGGCCCTTTAGGGTCTTGTAATTGGAATGAGTACAATGTA  | 487  |
| Query | 482 | AATACCTTAACGAGGAACAATTGGAGGGCAAGTCTGGTGCCAGCAGCCGCGGTAATTCCA  | 541  |
| Sbjct | 488 | AATACCTTAACGAGGAACAATTGGAGGGCAAGTCTGGTGCCAGCAGCCGCGGTAATTCCA  | 547  |
| Query | 542 | GCTCCAATAGCGTATATTAAGTTGTTGCAGTTAAAAGCTCGTAGTTGAACCTTGGGCT    | 601  |
| Sbjct | 548 | GCTCCAATAGCGTATATTAAGTTGTTGCAGTTAAAAGCTCGTAGTTGAACCTTGGGCT    | 607  |
| Query | 602 | TGGTTGGCCGGTCCGCCCTTTTGGCGAGTACTGGACCCAACCGAGCCTTTCCTTCTGGCT  | 661  |
| Sbjct | 608 | TGGTTGGCCGGTCCGCC-TTTTGGCGAGTACTGGACCCAACCGAGCCTTTCCTTCTGGCT  | 666  |
| Query | 662 | AACC-TTTCGCCCTTGTGGTGTGGCGAACCAGGACTTTTACTTTGAAAAATTAGAGT     | 720  |
| Sbjct | 667 | AACCAAGT-GCCCTTGTGGTGTGGCGAACCAGGACTTTTACTTTGAAAAATTAGAGT     | 725  |
| Query | 721 | GTTCAAAGCAGGCCTTT-GCTCGAATATATTAGCATGGAATAATAGAATAGGACGTTATG  | 779  |
| Sbjct | 726 | GTTCAAAGCAAGCGTTTCGCTCGAATATATTAGCATGGAATAATAGAATAGGACGTTATG  | 785  |
| Query | 780 | GTTCTATTTTGTGGTTTCTAGGACCATCGTAATGATTAATAGGGACGGTCGGGGGCATC   | 839  |
| Sbjct | 786 | GTTCTATTTTGTGGTTTCTAGGACCATCGTAATGATTAACAGGGACGGTCGGGGGCATC   | 845  |
| Query | 840 | AGTATTCAGTTGTCAGAGGTGAAATTCTTGGA-TTACCTGAAGACTAACTACTGCGAAAG  | 898  |
| Sbjct | 846 | AGTATTCAGTTGTCAGAGGTGAAATTCTTGGA-TTACCTGAAGACTAACTACTGCGAAAG  | 904  |
| Query | 899 | CATTTGCCAAGGACGTTTTTCATTAATCAAGAACGAAAGTTAGGGGATCGAAGATGATCAG | 958  |
| Sbjct | 905 | CATTTGCCAAGGACGTTTTTCATTAATCAAGAACGAAAGTTAGGGGATCGAAGATGATCAG | 964  |
| Query | 959 | ATACCGTCGTAGTCTTAACCATAAACTATGCCGACTAGGGATCGGGTGTGTTCTttttt   | 1018 |

|       |      |                                                              |      |
|-------|------|--------------------------------------------------------------|------|
| Sbjct | 965  | GTACCGTCGTAGTCTTAACCATAAACTATGCCGACTAGGGATCGGGTGTGTTCTTTTTT  | 1024 |
| Query | 1019 | tGACGCACTCGGCACCTTACGAGAAATCAAAGTCTTTGGGTTCTGGGGGAGTATGGTCC  | 1078 |
| Sbjct | 1025 | TGACGCACTCGGCACCTTACGAGAAATCAAAGTCTTTGGGTTCTGGGGGAGTATGGTCC  | 1084 |
| Query | 1079 | CAAGGCTGAAACTTAAAGGAATTGACGGAAGGGCACCACCAGGAGTGGAGCCTGCGGCTT | 1138 |
| Sbjct | 1085 | CAAGGCTGAAACTTAAAGGAATTGACGGAAGGGCACCACCAGGAGTGGAGCCTGCGGCTT | 1144 |
| Query | 1139 | AATTTGACTCAACACGGGGAAACTCACCAGGTCCAGACACAATAAGGATTGACAGATTGA | 1198 |
| Sbjct | 1145 | AATTTGACTCAACACGGGGAAACTCACCAGGTCCAGACACAATAAGGATTGACAGATTGA | 1204 |
| Query | 1199 | GAGCTCTTTCTTGATTTTGTGGGTGGTGGTGCATGGCCGTTCTTAGTTGGTGGAGTGATT | 1258 |
| Sbjct | 1205 | GAGCTCTTTCTTGATTTTGTGGGTGGTGGTGCATGGCCGTTCTTAGTTGGTGGAGTGATT | 1264 |
| Query | 1259 | TGTCTGCTTAATTGCGATAACGAACGAGACCTTAACCTACTAAATAGTGCTGCTAGCTTT | 1318 |
| Sbjct | 1265 | TGTCTGCTTAATTGCGATAACGAACGAGACCTTAACCTACTAAATAGTGCTGCTAGCTTT | 1324 |
| Query | 1319 | TGCTGGTATAGTCACTTCTTAGAGGGACTATCGATTTCAAGTCGATGGAAGTTTGAGGCA | 1378 |
| Sbjct | 1325 | GGCTGGTATAGTCACTTCTTAGAGGGACTATCGATTTCAAGTCGATGGAAGTTTGAGGCA | 1384 |
| Query | 1379 | ATAACAGGTCTGTGATGCCCTTAGACGTTCTGGGCCGCACGCGCTACACTGACGGAGC   | 1438 |
| Sbjct | 1385 | ATAACAGGTCTGTGATGCCCTTAGACGTTCTGGGCCGCACGCGCTACACTGACGGAGC   | 1444 |
| Query | 1439 | CAACGAGTATTAACCTTGGCCGAGAGGTCTGGGAAATCTTGTGAAACTCCGTCGTGCTGG | 1498 |
| Sbjct | 1445 | CAGCGAGTATTAACCTTGGCCGAGAGGTCTGGGAAATCTTGTGAAACTCCGTCGTGCTGG | 1504 |
| Query | 1499 | GGATAGAGCATTGTAATTATTGCTCTTCAACGAGGAATTCCTAGTAAGCGCAAGTCATCA | 1558 |
| Sbjct | 1505 | GGATAGAGCATTGTAATTATTGCTCTTCAACGAGGAATTCCTAGTAAGCGCAAGTCATCA | 1564 |
| Query | 1559 | GCTTGCGTTGATTACGTCCCTGCCCTTTGTACACACCGCCCGTCGCTACTACCGATTGAA | 1618 |
| Sbjct | 1565 | GCTTGCGTTGATTACGTCCCTGCCCTTTGTACACACCGCCCGTCGCTACTACCGATTGAA | 1624 |
| Query | 1619 | TGGCTTAGTGAGGCCTCCGGATTGGTTTAAAGAAGGGGGCAACTCCATCTTGGAACCGAA | 1678 |
| Sbjct | 1625 | TGGCTTAGTGAGGCCTCCGGATTGGTTTAAAGAAGGGGGCAACTCCATCTTGGAACCGAA | 1684 |
| Query | 1679 | AAGCTGGTCAAACCTTGGTCATTTAGAGGAAGTAAAAGTCGTAACAAGTTTCCGTA     | 1734 |
| Sbjct | 1685 | AAGCTGGTCAAACCTTGGTCATTTAGAGGAAGTAAAAGTCGTAACAAGTTTCCGTA     | 1740 |

>emb|AJ508269.1| *Pichia caribbica* partial 18S rRNA gene, strain CBS 2022T  
Length=1710

Score = 3086 bits (1671), Expect = 0.0  
Identities = 1701/1714 (99%), Gaps = 7/1714 (0%)  
Strand=Plus/Plus

|       |    |                                                              |     |
|-------|----|--------------------------------------------------------------|-----|
| Query | 18 | GTATAAGCAATTTATACAGTGAAACTGCGAATGGCTCATTAAATCAGTTATCGTTTATTT | 77  |
| Sbjct | 1  | GTATAAGCAATTTATACAGTGAAACTGCGAATGGCTCATTAAATCAGTTATCGTTTATTT | 60  |
| Query | 78 | GATAGTACCTTTACTACTTGGATAACCGTGGTAATTCTAGAGCTAATACATGCTAAAAAT | 137 |

|       |      |                                                               |      |
|-------|------|---------------------------------------------------------------|------|
| Sbjct | 61   | GATAGTACCTTTACTACTTGGATAACCGTGGTAATTCTAGAGCTAATACATGCTAAAAAT  | 120  |
| Query | 138  | CCCGACTGTTTGAAGGGATGTATTTATTAGATAAAAAATCAATGCT-TTTCGGAGCTCT   | 196  |
| Sbjct | 121  | CCCGACTGTTTGAAGGGATGTATTTATTAGATAAAAAATCAATGCTCTTT--GAGCTCT   | 178  |
| Query | 197  | TTGATGATTCATAAATAACTTTTCGAATCGCATGGCCTTGTGCTGGCGATGGTTCATTCAA | 256  |
| Sbjct | 179  | TTGATGATTCATAAATAACTTTTCGAATCGCATGGCCTTGTGCTGGCGATGGTTCATTCAA | 238  |
| Query | 257  | ATTTCTGCCCTATCAACTTTTCGATGGTAGGATAGTGGCCTACCATGGTTTCAACGGGTAA | 316  |
| Sbjct | 239  | ATTTCTGCCCTATCAACTTTTCGATGGTAGGATAGTGGCCTACCATGGTTTCAACGGGTAA | 298  |
| Query | 317  | CGGGGAATAAGGGTTCGATTCCGGAGAGGGAGCCTGAGAAACGGCTACCACATCCAAGGA  | 376  |
| Sbjct | 299  | CGGGGAATAAGGGTTCGATTCCGGAGAGGGAGCCTGAGAAACGGCTACCACATCCAAGGA  | 358  |
| Query | 377  | AGGCAGCAGGCGCGCAAATTACCCAATCCCGACACGGGGAGGTAGTGACAATAAATAACG  | 436  |
| Sbjct | 359  | AGGCAGCAGGCGCGCAAATTACCCAATCCCGACACGGGGAGGTAGTGACAATACATAACG  | 418  |
| Query | 437  | ATACAGGGCCCTTTCGGGTCTTGTAATTGGAATGAGTACAATGTAAATACCTTAACGAGG  | 496  |
| Sbjct | 419  | ATACAGGGCCCTTTCGGGTCTTGTAATTGGAATGAGTACAATGTAAATACCTTAACGAGG  | 478  |
| Query | 497  | AACAATTGGAGGGCAAGTCTGGTGCCAGCAGCCGCGTAATTCCAGCTCCAATAGCGTAT   | 556  |
| Sbjct | 479  | AACAATTGGAGGGCAAGTCTGGTGCCAGCAGCCGCGTAATTCCAGCTCCAATAGCGTAT   | 538  |
| Query | 557  | ATTAAAGTTGTTGCAGTTAAAAAGCTCGTAGTTGAACCTTGGGCTTGGTTGGCCGGTCCG  | 616  |
| Sbjct | 539  | ATTAAAGTTGTTGCAGTTAAAAAGCTCGTAGTTGAACCTTGGGCTTGGTTGGCCGGTCCG  | 598  |
| Query | 617  | CCTTTTTGGCGAGTACTGGACCCAACCGAGCCTTTCCTTCTGGCTAACCTTTCGCCCTTG  | 676  |
| Sbjct | 599  | CCTTTTTGGCGAGTACTGGACCCAACCGAGCCTTTCCTTCTGGCTAACCTTTCGCCCTTG  | 658  |
| Query | 677  | TGGTGTTTGGCGAACCAGGACTTTTACTTTGAAAAAATTAGAGTGTTCAAAGCAGGCCTT  | 736  |
| Sbjct | 659  | TGGTGTTTGGCGAACCAGGACTTTTACTTTGAAAAAATTAGAGTGTTCAAAGCAGGCCTT  | 718  |
| Query | 737  | TGCTCGAATATATTAGCATGGAATAATAGAATAGGACGTTATGGTCTATTTTGTGGTT    | 796  |
| Sbjct | 719  | TGCTCGAATATATTAGCATGGAATAATAGAATAGGACGTTATGGTCTATTTTGTGGTT    | 778  |
| Query | 797  | TCTAGGACCATCGTAATGATTAATAGGGACGGTCGGGGGCATCAGTATTCAGTTGTCAGA  | 856  |
| Sbjct | 779  | TCTAGGACCATCGTAATGATTAATAGGGACGGTCGGGGGCATCAGTATTCAGTTGTCAGA  | 838  |
| Query | 857  | GGTGAAATTCCTGGA-TTACCTGAAGACTAACTACTGCGAAAGCATTGCCAAGGACGTT   | 915  |
| Sbjct | 839  | GGTGAAATTCCTAGATTTA-CTGAAGACTAACTACTGCGAAAGCATTGCCAAGGACGTT   | 897  |
| Query | 916  | TTCATTAATCAAGAACGAAAGTTAGGGGATCGAAGATGATCAGATACCGTCGTAGTCTTA  | 975  |
| Sbjct | 898  | TTCATTAATCAAGAACGAAAGTTAGGGGATCGAAGATGATCAGATACCGTCGTAGTCTTA  | 957  |
| Query | 976  | ACCATAAACTATGCCGACTAGGGATCGGGTGTGTTCTttttttGACGCACTCGGCACCT   | 1035 |
| Sbjct | 958  | ACCATAAACTATGCCGACTAGGGATCGGGTGTGTTCTTTTTTTGACGCACTCGGCACCT   | 1017 |
| Query | 1036 | TACGAGAAATCAAAGTCTTTGGGTTCTGGGGGAGTATGGTCGCAAGGCTGAAACTTAAA   | 1095 |

|       |      |                                                              |      |
|-------|------|--------------------------------------------------------------|------|
| Sbjct | 1018 | TACGAGAAATCAAAGTCTTTGGGTTCTGGGGGAGTATGGTCGCAAGGCTGAAACTTAAA  | 1077 |
| Query | 1096 | GGAATTGACGGAAGGGCACCACCAGGAG-TGGAGCCTGCGGCTTAATTTGACTCAACACG | 1154 |
| Sbjct | 1078 | GGAATTGACGGAAGGGCACCACCAGGAGTTGG-GACTGCGGCTTAATTTGACTCAACACG | 1136 |
| Query | 1155 | GGGAAACTCACCAGGTCCAGACACAATAAGGATTGACAGATTGAGAGCTCTTTCTTGATT | 1214 |
| Sbjct | 1137 | GGGAAACTCACCAGGTCCAGACACAATAAGGATTGACAGATTGAGAGCTCTTTCTTGATT | 1196 |
| Query | 1215 | TTGTGGGTGGTGGTGCATGGCCGTTCTTAGTTGGTGGAGTGATTTGTCTGCTTAATTGCG | 1274 |
| Sbjct | 1197 | TTGTGGGTGGTGGTGCATGGCCGTTCTTAGTTGGTGGAGTGATTTGTCTGCTTAATTGCG | 1256 |
| Query | 1275 | ATAACGAACGAGACCTTAACCTACTAAATAGTGCTGCTAGCTTTTGCTGGTATAGTCACT | 1334 |
| Sbjct | 1257 | ATAACGAACGAGACCTTAACCTACTAAATAGTGCTGCTAGCTTTTGCTGGTATAGTCACT | 1316 |
| Query | 1335 | TCTTAGAGGGACTATCGATTTCAAGTCGATGGAAGTTTGAGGCAATAACAGGTCTGTGAT | 1394 |
| Sbjct | 1317 | TCTTAGAGGGACTATCGATTTCAAGTCGATGGAAGTTTGAGGCAATAACAGGTCTGTGAT | 1376 |
| Query | 1395 | GCCCTTAGACGTTCTGGGCCGCACGCGCTACACTGACGGAGCCAACGAGTATTAACCT   | 1454 |
| Sbjct | 1377 | GCCCTTAGACGTTCTGGGCCGCACGCGCTACACTGACGGAGCCAACGAGTATTAACCT   | 1436 |
| Query | 1455 | TGGCCGAGAGGTCTGGGAAATCTTGTGAAACTCCGTCGTGCTGGGGATAGAGCATTGTAA | 1514 |
| Sbjct | 1437 | TGGCCGAGAGGTCTGGGAAATCTTGTGAAACTCCGTCGTGCTGGGGATAGAGCATTGTAA | 1496 |
| Query | 1515 | TTATTGCTCTTCAACGAGGAATTCTTAGTAAGCGCAAGTCATCAGCTTGCCTTGATTACG | 1574 |
| Sbjct | 1497 | TTATTGCTCTTCAACGAGGAATTCTTAGTAAGCGCAAGTCATCAGCTTGCCTTGATTACG | 1556 |
| Query | 1575 | TCCCTGCCCTTTGTACACACCGCCCGTCGCTACTACCGATTGAATGGCTTAGTGAGGCCT | 1634 |
| Sbjct | 1557 | TCCCTGCCCTTTGTACACACCGCCCGTCGCTACTACCGATTGAATGGCTTAGTGAGGCCT | 1616 |
| Query | 1635 | CCGGATTGGTTTAAAGAAGGGGGCAACTCCATCTTGAACCGAAAAGCTGGTCAAACCTTG | 1694 |
| Sbjct | 1617 | CCGGATTGGTTTAAAGAAGGGGGCAACTCCATCTTGAACCGAAAAGCTGGTCAAACCTTG | 1676 |
| Query | 1695 | GTCATTTAGAGGAAGTAAAAGTCGTAACAAGGTT                           | 1728 |
| Sbjct | 1677 | GTCATTTAGAGGAAGTAAAAGTCGTAACAAGGTT                           | 1710 |

>gb|AY242197.1| *Candida* sp. BG01-7-21-009A-1-1 18S ribosomal RNA gene, partial sequence  
Length=1716

Score = 3083 bits (1669), Expect = 0.0  
Identities = 1698/1711 (99%), Gaps = 6/1711 (0%)  
Strand=Plus/Plus

|       |     |                                                              |     |
|-------|-----|--------------------------------------------------------------|-----|
| Query | 3   | GCCATGCATGTCTAAGTATAAGCAATTTATACAGTGAAACTGCGAATGGCTCATTAAATC | 62  |
| Sbjct | 10  | GCCATGCATGTCTAAGTATAAGCAATTTATACAGTGAAACTGCGAATGGCTCATTAAATC | 69  |
| Query | 63  | AGTTATCGTTTATTTGATAGTACCTTTACTACTTGGATAACCGTGGTAATTCTAGAGCTA | 122 |
| Sbjct | 70  | AGTTATCGTTTATTTGATAGTACCTTTACTACTTGGATAACCGTGGTAATTCTAGAGCTA | 129 |
| Query | 123 | ATACATGCTAAAAATCCCGACTGTTTGAAGGGATGTATTTATTAGATAAAAAATCAATG  | 182 |

|       |      |                                                                   |      |
|-------|------|-------------------------------------------------------------------|------|
| Sbjct | 130  | <br>ATACATGCTAAAAATCCCGACT-TCTGGAAGGGATGTATTTATTAGATAAAAAATCAATG  | 188  |
| Query | 183  | CTTTTCGGAGCTCTTTGATGATTATAATAACTTTTCGAATCGCATGGCCTTGTGCTGGC       | 242  |
| Sbjct | 189  | <br>CTTTTCGGAGCTCTTTGATGATTATAATAACTTTTCGAATCGCATGGCCTTGTGCTGGC   | 248  |
| Query | 243  | GATGGTTCATTCAAATTTCTGCCCTATCAACTTTTCGATGGTAGGATAGTGGCCTACCATG     | 302  |
| Sbjct | 249  | <br>GATGGTTCATTCAAATTTCTGCCCTATCAACTTTTCGATGGTAGGATAGTGGCCTACCATG | 308  |
| Query | 303  | GTTTCAACGGGTAACGGGAATAAGGGTTCGATTCGGAGAGGGAGCCTGAGAAACGGCT        | 362  |
| Sbjct | 309  | <br>GTTTCAACGGGTAACGGGAATAAGGGTTCGATTCGGAGAGGGAGCCTGAGAAACGGCT    | 368  |
| Query | 363  | ACCACATCCAAGGAAGGCAGCAGGCGCGCAAATTACCCAATCCCGACACGGGGAGGTAGT      | 422  |
| Sbjct | 369  | <br>ACCACATCCAAGGAAGGCAGCAGGCGCGCAAATTACCCAATCCCGACACGGGGAGGTAGT  | 428  |
| Query | 423  | GACAATAAATAACGATACAGGGCCCTTTCGGGTCTTGTAAATTGGAATGAGTACAATGTAA     | 482  |
| Sbjct | 429  | <br>GACAATAAATAACGATACAGGGCCCTTTCGGGTCTTGTAAATTGGAATGAGTACAATGTAA | 488  |
| Query | 483  | ATACCTTAACGAGGAACAATTGGAGGGCAAGTCTGGTGCCAGCAGCCGCGGTAATTCAG       | 542  |
| Sbjct | 489  | <br>ATACCTTAACGAGGAACAATTGGAGGGCAAGTCTGGTGCCAGCAGCCGCGGTAATTCAG   | 548  |
| Query | 543  | CTCCAATAGCGTATATTAAGTTGTTGCAGTTAAAAAGCTCGTAGTTGAACCTTGGGCTT       | 602  |
| Sbjct | 549  | <br>CTCCAATAGCGTATATTAAGTTGTTGCAGTTAAAAAGCTCGTAGTTGAACCTTGGGCTT   | 608  |
| Query | 603  | GGTTGGCCGGTCCGCCTTTTTGGCGAGTACTGGACCCAACCGAGCCTTTCCTTCTGGCTA      | 662  |
| Sbjct | 609  | <br>GGTTGGCCGGTCCG-CTTTATGGCGAGTACTGGACCCAACCGAGCCTTTCCTTCTGGCTA  | 667  |
| Query | 663  | ACCTTTCGCCCTTGTGGTGTGGGGAACCAGGACTTTTACTTTGAAAAATTAGAGTGT         | 722  |
| Sbjct | 668  | <br>ACCTTTCGCCCTTGTGGTGTGGGGAACCAGGACTTTTACTTTGAAAAATTAGAGTGT     | 727  |
| Query | 723  | TCAAAGCAGGCCTTTGCTCGAATATATTAGCATGGAATAATAGAATAGGACGTTATGGTT      | 782  |
| Sbjct | 728  | <br>TCAAAGCAGGCCTTTGCTCGAATATATTAGCATGGAATAATAGAATAGGACGTTATGGTT  | 787  |
| Query | 783  | CTATTTTGTGGTTTCTAGGACCATCGTAATGATTAATAGGGACGGTCGGGGGCATCAGT       | 842  |
| Sbjct | 788  | <br>CTATTTTGTGGTTTCTAGGACCATCGTAATGATTAATAGGGACGGTCGGGGGCATCAGT   | 847  |
| Query | 843  | ATTCAGTTGTCAGAGGTGAAATTCTTGGA-TTACCTGAAGACTAACTACTGCGAAAGCAT      | 901  |
| Sbjct | 848  | <br>ATTCAGTTGTCAGAGGTGAAATTCTTGGA-CTGAAGACTAACTACTGCGAAAGCAT      | 906  |
| Query | 902  | TTGCCAAGGACGTTTTCATTAATCAAGAACGAAAGTTAGGGGATCGAAGATGATCAGATA      | 961  |
| Sbjct | 907  | <br>TTGCCAAGGACGTTTTCATTAATCAAGAACGAAAGTTAGGGGATCGAAGATGATCAGATA  | 966  |
| Query | 962  | CCGTCGTAGTCTTAACCATAAACTATGCCGACTAGGGATCGGGTGTGTTCTtttttttGA      | 1021 |
| Sbjct | 967  | <br>CCGTCGTAGTCTTAACCATAAACTATGCCGACTAGGGATCGGGTGTGTTCTTTTTTTTGA  | 1026 |
| Query | 1022 | CGCACTCGGCACCTTACGAGAAATCAAAGTCTTTGGGTTCTGGGGGAGTATGGTCGCAA       | 1081 |
| Sbjct | 1027 | <br>CGCACTCGGCACCTTACGAGAAATCAAAGTCTTTGGGTTCTGGGGGAGTATGGTCGCAA   | 1086 |
| Query | 1082 | GGCTGAAACTTAAAGGAATTGACGGAAGGGCACCACCAGGAGTGGAGCCTGCGGCTTAAT      | 1141 |

|       |      |                                                                  |      |
|-------|------|------------------------------------------------------------------|------|
| Sbjct | 1087 | <br>GGCTGAAACTTAAAGGAATTGACGGAAGGGCACCACCAGGAGTGGAGCCTGCGGCTTAAT | 1146 |
| Query | 1142 | TTGACTCAACACGGGGAAACTCACCAGGTCCAGACACAATAAGGATTGACAGATTGAGAG     | 1201 |
| Sbjct | 1147 | <br>TTGACTCAACACGGGGAAACTCACCAGGTCCAGACACAATAAGGATTGACAGATTGAGAG | 1206 |
| Query | 1202 | CTCTTTCTTGATTTTGTGGGTGGTGGTGCATGGCCGTTCTTAGTTGGTGGAGTGATTTGT     | 1261 |
| Sbjct | 1207 | <br>CTCTTTCTTGATTTTGTGGGTGGTGGTGCATGGCCGTTCTTAGTTGGTGGAGTGATTTGT | 1266 |
| Query | 1262 | CTGCTTAATTGCGATAACGAACGAGACCTTAACCTACTAAATAGTGCTGCTAGCTTTTGC     | 1321 |
| Sbjct | 1267 | <br>CTGCTTAATTGCGATAACGAACGAGACCTTAACCTACTAAATAGTGCTGCTAGCTTTTGC | 1326 |
| Query | 1322 | TGGTATAGTCACTTCTTAGAGGGACTATCGATTTCAAGTCGATGGAAGTTTGAGGCAATA     | 1381 |
| Sbjct | 1327 | <br>TGGTATAGTCACTTCTTAGAGGGACTATCGATTTCAAGTCGATGGAAGTTTGAGGCAATA | 1386 |
| Query | 1382 | ACAGGTCTGTGATGCCCTTAGACGTTCTGGGCCGCACGCGCGCTACACTGACGGAGCCAA     | 1441 |
| Sbjct | 1387 | <br>ACAGGTCTGTGATGCCCTTAGACGTTCTGGGCCGCACGCGCGCTACACTGACGGAGCCAG | 1446 |
| Query | 1442 | CGAGTAT-TAACCTTGGCCGAGAGGTCTGGGAAATCTTGTGAAACTCCGTCGTGCTGGGG     | 1500 |
| Sbjct | 1447 | <br>CGAGT-TCTAACCTTGGCCGAGAGGTCTGGGTAATCTTGTGAAACTCCGTCGTGCTGGGG | 1505 |
| Query | 1501 | ATAGAGCATTGTAATTATTGCTCTTCAACGAGGAATTCCTAGTAAGCGCAAGTCATCAGC     | 1560 |
| Sbjct | 1506 | <br>ATAGAGCATTGTAATTATTGCTCTTCAACGAGGAATTCCTAGTAAGCGCAAGTCATCAGC | 1565 |
| Query | 1561 | TTGCGTTGATTACGTCCCTGCCCTTTGTACACACCGCCCGTCGCTACTACCGATTGAATG     | 1620 |
| Sbjct | 1566 | <br>TTGCGTTGATTACGTCCCTGCCCTTTGTACACACCGCCCGTCGCTACTACCGATTGAATG | 1625 |
| Query | 1621 | GCTTAGTGAGGCCTCCGGATTGGTTTAAAGAAGGGGGCAACTCCATCTTGAACCGAAAA      | 1680 |
| Sbjct | 1626 | <br>GCTTAGTGAGGCCTCCGGATTGGTTTAAAGAAGGGGGCAACTCCATCTTGAACCGAAAA  | 1685 |
| Query | 1681 | GCTGGTCAAACCTGGTCATTTAGAGGAAGTA                                  | 1711 |
| Sbjct | 1686 | <br>GCTAGTCAAACCTGGTCATTTAGAGGAAGTA                              | 1716 |

>emb|AJ508270.1| *Candida carpophila* partial 18S rRNA gene, strain CBS 5256T  
Length=1710

Score = 3083 bits (1669), Expect = 0.0  
Identities = 1700/1714 (99%), Gaps = 7/1714 (0%)  
Strand=Plus/Plus

|       |     |                                                                  |     |
|-------|-----|------------------------------------------------------------------|-----|
| Query | 18  | GTATAAGCAATTTATACAGTGAAACTGCGAATGGCTCATTAAATCAGTTATCGTTTATTT     | 77  |
| Sbjct | 1   | <br>GTATAAGCAATTTATACAGTGAAACTGCGAATGGCTCATTAAATCAGTTATCGTTTATTT | 60  |
| Query | 78  | GATAGTACCTTTACTACTTGGATAACCGTGGTAATTCTAGAGCTAATACATGCTAAAAAT     | 137 |
| Sbjct | 61  | <br>GATAGTACCTTTACTACTTGGATAACCGTGGTAATTCTAGAGCTAATACATGCTAAAAAT | 120 |
| Query | 138 | CCCGACTGTTTGAAGGGATGTATTTATTAGATAAAAAATCAATGCT-TTTCGGAGCTCT      | 196 |
| Sbjct | 121 | <br>CCCGACTGTTTGAAGGGATGTATTTATTAGATAAAAAATCAATGCTCTTT--GAGCTCT  | 178 |
| Query | 197 | TTGATGATTCAATAAACTTTTCGAATCGCATGGCCTTGTGCTGGCGATGGTTCATTCAA      | 256 |



|       |      |                                                                   |      |
|-------|------|-------------------------------------------------------------------|------|
| Sbjct | 179  | <br>TTGATGATTCATAATAACTTTTTCGAATCGCATGGCCTTGTGCTGGCGATGGTTCATTCAA | 238  |
| Query | 257  | ATTTCTGCCCTATCAACTTTTCGATGGTAGGATAGTGGCCTACCATGGTTTCAACGGGTAA     | 316  |
| Sbjct | 239  | <br>ATTTCTGCCCTATCAACTTTTCGATGGTAGGATAGTGGCCTACCATGGTTTCAACGGGTAA | 298  |
| Query | 317  | CGGGGAATAAGGGTTCGATTCCGGAGAGGGAGCCTGAGAAACGGCTACCACATCCAAGGA      | 376  |
| Sbjct | 299  | <br>CGGGGAATAAGGGTTCGATTCCGGAGAGGGAGCCTGAGAAACGGCTACCACATCCAAGGA  | 358  |
| Query | 377  | AGGCAGCAGGCGCGCAAATTACCCAATCCCGACACGGGGAGGTAGTGACAATAAATAACG      | 436  |
| Sbjct | 359  | <br>AGGCAGCAGGCGCGCAAATTACCCAATCCCGACACGGGGAGGTAGTGACAATACATAACG  | 418  |
| Query | 437  | ATACAGGGCCCTTTCGGGTCTTGTAATTGGAATGAGTACAATGTAAATACCTTAACGAGG      | 496  |
| Sbjct | 419  | <br>ATACAGGGCCCTTTCGGGTCTTGTAATTGGAATGAGTACAATGTAAATACCTTAACGAGG  | 478  |
| Query | 497  | AACAATTGGAGGGCAAGTCTGGTGCCAGCAGCCGCGTAATTCCAGCTCCAATAGCGTAT       | 556  |
| Sbjct | 479  | <br>AACAATTGGAGGGCAAGTCTGGTGCCAGCAGCCGCGTAATTCCAGCTCCAATAGCGTAT   | 538  |
| Query | 557  | ATTAAAGTTGTTGCAGTTAAAAAGCTCGTAGTTGAACCTTGGGCTTGGTTGGCCGGTCCG      | 616  |
| Sbjct | 539  | <br>ATTAAAGTTGTTGCAGTTAAAAAGCTCGTAGTTGAACCTTGGGCTTGGTTGGCCGGTCCG  | 598  |
| Query | 617  | CCTTTTTGGCGAGTACTGGACCCAACCGAGCCTTTCCTTCTGGCTAACCTTTCGCCCTTG      | 676  |
| Sbjct | 599  | <br>CCTTTTTGGCGAGTACTGGACCCAACCGAGCCTTTCCTTCTGGCTAACCTTTCGCCCTTG  | 658  |
| Query | 677  | TGGTGTTTTGGCGAACCAGGACTTTTACTTTGAAAAAATTAGAGTGTTCAAAGCAGGCCTT     | 736  |
| Sbjct | 659  | <br>TGGTGTTTTGGCGAACCAGGACTTTTACTTTGAAAAAATTAGAGTGTTCAAAGCAGGCCTT | 718  |
| Query | 737  | TGCTCGAATATATTAGCATGGAATAATAGAATAGGACGTTATGGTTCATTTTGTGGTT        | 796  |
| Sbjct | 719  | <br>TGCTCGAATATATTAGCATGGAATAATAGAATAGGACGTTATGGTTCATTTTGTGGTT    | 778  |
| Query | 797  | TCTAGGACCATCGTAATGATTAATAGGGACGGTCGGGGGCATCAGTATTCAGTTGTCAGA      | 856  |
| Sbjct | 779  | <br>TCTAGGACCATCGTAATGATTAATAGGGACGGTCGGGGGCATCAGTATTCAGTTGTCAGA  | 838  |
| Query | 857  | GGTGAAATTCTTGGA-TTACCTGAAGACTAACTACTGCGAAAGCATTTGCCAAGGACGTT      | 915  |
| Sbjct | 839  | <br>GGTGAAATTCTTAGATTTA-CTGAAGACTAACTACTGCGAAAGCATTTGCCAAGGACGTT  | 897  |
| Query | 916  | TTCATTAATCAAGAACGAAAGTTAGGGGATCGAAGATGATCAGATACCGTCGTAGTCTTA      | 975  |
| Sbjct | 898  | <br>TTCATTAATCAAGAACGAAAGTTAGGGGATCGAAGATGATCAGATACCGTCGTAGTCTTA  | 957  |
| Query | 976  | ACCATAAACTATGCCGACTAGGGATCGGGTGTGTTCTtttttttGACGCACTCGGCACCT      | 1035 |
| Sbjct | 958  | <br>ACCATAAACTATGCCGACTAGGGATCGGGTGTGTTCTTTTTTTGACGCACTCGGCACCT   | 1017 |
| Query | 1036 | TACGAGAAATCAAAGTCTTTGGGTTCTGGGGGAGTATGGTCGCAAGGCTGAAACTTAAA       | 1095 |
| Sbjct | 1018 | <br>TACGAGAAATCAAAGTCTTTGGGTTCTGGGGGAGTATGGTCGCAAGGCTGAAACTWAAA   | 1077 |
| Query | 1096 | GGAATTGACGGAAGGGCACCACCAGGAG-TGGAGCCTGCGGCTTAATTTGACTCAACACG      | 1154 |
| Sbjct | 1078 | <br>GGAATTGACGGAAGGGCACCACCAGGAGTTGG-GACTGCGGCTTAATTTGACTCAACACG  | 1136 |
| Query | 1155 | GGGAAACTCACCAGGTCCAGACACAATAAGGATTGACAGATTGAGAGCTCTTTCTTGATT      | 1214 |

|       |      |                                                                  |      |
|-------|------|------------------------------------------------------------------|------|
| Sbjct | 1137 | <br>GGGAAACTCACCAGGTCCAGACACAATAAGGATTGACAGATTGAGAGCTCTTTCTTGATT | 1196 |
| Query | 1215 | TTGTGGGTGGTGGTGCATGGCCGTTCTTAGTTGGTGGAGTGATTTGTCTGCTTAATTGCG     | 1274 |
| Sbjct | 1197 | <br>TTGTGGGTGGTGGTGCATGGCCGTTCTTAGTTGGTGGAGTGATTTGTCTGCTTAATTGCG | 1256 |
| Query | 1275 | ATAACGAACGAGACCTTAACCTACTAAATAGTGCTGCTAGCTTTTGCTGGTATAGTCACT     | 1334 |
| Sbjct | 1257 | <br>ATAACGAACGAGACCTTAACCTACTAAATAGTGCTGCTAGCTTTTGCTGGTATAGTCACT | 1316 |
| Query | 1335 | TCTTAGAGGGACTATCGATTTCAAGTCGATGGAAGTTTGAGGCAATAACAGGTCTGTGAT     | 1394 |
| Sbjct | 1317 | <br>TCTTAGAGGGACTATCGATTTCAAGTCGATGGAAGTTTGAGGCAATAACAGGTCTGTGAT | 1376 |
| Query | 1395 | GCCCTTAGACGTTCTGGGCCGCACGCGCTACACTGACGGAGCCAACGAGTATTAACCT       | 1454 |
| Sbjct | 1377 | <br>GCCCTTAGACGTTCTGGGCCGCACGCGCTACACTGACGGAGCCAGCGAGTATTAACCT   | 1436 |
| Query | 1455 | TGGCCGAGAGGTCTGGGAAATCTTGTGAAACTCCGTCGTGCTGGGGATAGAGCATTGTAA     | 1514 |
| Sbjct | 1437 | <br>TGGCCGAGAGGTCTGGGAAATCTTGTGAAACTCCGTCGTGCTGGGGATAGAGCATTGTAA | 1496 |
| Query | 1515 | TTATTGCTCTTCAACGAGGAATTCTTAGTAAGCGCAAGTCATCAGCTTGCCTTGATTACG     | 1574 |
| Sbjct | 1497 | <br>TTATTGCTCTTCAACGAGGAATTCTTAGTAAGCGCAAGTCATCAGCTTGCCTTGATTACG | 1556 |
| Query | 1575 | TCCCTGCCCTTTGTACACACCGCCCGTCGCTACTACCGATTGAATGGCTTAGTGAGGCCT     | 1634 |
| Sbjct | 1557 | <br>TCCCTGCCCTTTGTACACACCGCCCGTCGCTACTACCGATTGAATGGCTTAGTGAGGCCT | 1616 |
| Query | 1635 | CCGATTGGTTTAAAGAAGGGGGCAACTCCATCTTGGAACCGAAAAGCTGGTCAAACCTTG     | 1694 |
| Sbjct | 1617 | <br>CCGATTGGTTTAAAGAAGGGGGCAACTCCATCTTGGAACCGAAAAGCTGGTCAAACCTTG | 1676 |
| Query | 1695 | GTCATTTAGAGGAAGTAAAAGTCGTAACAAGGTT 1728                          |      |
| Sbjct | 1677 | <br>GTCATTTAGAGGAAGTAAAAGTCGTAACAAGGTT 1710                      |      |

>emb|AM261069.1| Debaryomyces sp. MTCC 7061 18S rRNA gene, strain MTCC 7061  
Length=1753

Score = 3079 bits (1667), Expect = 0.0  
Identities = 1713/1735 (98%), Gaps = 4/1735 (0%)  
Strand=Plus/Plus

|       |     |                                                                   |     |
|-------|-----|-------------------------------------------------------------------|-----|
| Query | 3   | GCCATGCATGTCTAAGTATAAGCAATTTATACAGTGAAACTGCGAATGGCTCATTAAATC      | 62  |
| Sbjct | 21  | <br>GCCATGCATGTCTAAGTATAAGCAATTTATACAGTGAAACTGCGAATGGCTCATTAAATC  | 80  |
| Query | 63  | AGTTATCGTTTATTTGATAGTACCTTTACTACTTGG-ATAACCGTGGTAATTCTAGAGCT      | 121 |
| Sbjct | 81  | <br>AGTTATCGTTTATTTGATAGTACCTTTACTAC-TGGTATAACCGTGGTAATTCTAGAGCT  | 139 |
| Query | 122 | AATACATGCTAAAAATCCCGACTGTTTGGGAAGGGATGTATTTATTAGATAAAAAATCAAT     | 181 |
| Sbjct | 140 | <br>AATACATGCTGAAAATCCCGACTGTTTGGGAAGGGATGTATTTATTAGATAAAAAATCAAC | 199 |
| Query | 182 | GCTTTTCGGAGCTCTTTGATGATTCATAATAACTTTTCGAATCGCATGGCCTTGTGCTGG      | 241 |
| Sbjct | 200 | <br>GCTCTTCGGAGCTCTTTGATGATTCATAATAACTTTTCGAATCGCATGGCCTTGTGCTGG  | 259 |
| Query | 242 | CGATGGTTCATTCAAATTTCTGCCCTATCAACTTTCGATGGTAGGATAGTGGCCTACCAT      | 301 |

|       |      |                                                                   |      |
|-------|------|-------------------------------------------------------------------|------|
| Sbjct | 260  | <br>CGATGGTTCATTCAAATTTCTGCCCTATCAACTTTCGATGGTAGGATAGTGGCCTACCAT  | 319  |
| Query | 302  | GGTTTCAACGGGTAACGGGGAATAAGGGTTCGATTCCGGAGAGGGAGCCTGAGAAACGGC      | 361  |
| Sbjct | 320  | <br>GGTTTCAACGGGTAACGGGGAATAAGGGTTCGATTCCGGAGAGGGAGCCTGAGAAACGGC  | 379  |
| Query | 362  | TACCACATCCAAGGAAGGCAGCAGGCGCGCAAATTACCCAATCCCGACACGGGGAGGTAG      | 421  |
| Sbjct | 380  | <br>TACCACATCCAAGGAAGGCAGCAGGCGCGCAAATTACCCAATCCCGACACGGGGAGGTAG  | 439  |
| Query | 422  | TGACAATAAATAACGATACAGGGCCCTTTCGGGTCTTGTAATTGGAATGAGTACAATGTA      | 481  |
| Sbjct | 440  | <br>TGACAATATATAACGATACAGGGCCCTTTCGGGTCTTGTAATTGGAATGAGTACAATGTA  | 499  |
| Query | 482  | AATACCTTAACGAGGAACAATTGGAGGGCAAGTCTGGTGCCAGCAGCCGCGGTAATTCCA      | 541  |
| Sbjct | 500  | <br>AATACCTTAACGAGGAACAATTGGAGGGCAAGTCTGGTGCCAGCAGCCGCGGTAATTCCA  | 559  |
| Query | 542  | GCTCCAATAGCGTATATTAAGTTGTTGCAGTTAAAAAGCTCGTAGTTGAACCTTGGGCT       | 601  |
| Sbjct | 560  | <br>GCTCCAATAGCGTATATTAAGTTGTTGCAGTTAAAAAGCTCGTAGTTGAACCTTGGGCT   | 619  |
| Query | 602  | TGGTTGGCCGGTCCGCCTTTTTGGCGAGTACTGGACCCAACCGAGCCTTTCCTTCTGGCT      | 661  |
| Sbjct | 620  | <br>TGGTTGGCCGGTCCGCCTTTTTGGCGGTACTGGACCCAACCGAGCCTTTCCTTCTGGCT   | 679  |
| Query | 662  | AACCTTTCGCCCTTGTGGTGTGGCGAACCAGGACTTTTACTTTGAAAAATTAGAGTG         | 721  |
| Sbjct | 680  | <br>AACCTATCGCCCTTGTGGTGTGGCGAACCAGGACTTTTACTTTGAAAAATTAGAGTG     | 739  |
| Query | 722  | TTCAAAGCAGGCCTTTGCTCGAATATATTAGCATGGAATAATAGAATAGGACGTTATGGT      | 781  |
| Sbjct | 740  | <br>TTCAAAGCAGGCCTTTGCTCGAATATATTAGCATGGAATAATAGAATAGGACGTTATGGT  | 799  |
| Query | 782  | TCTATTTTGTGGTTTCTAGGACCATCGTAATGATTAATAGGGACGGTCGGGGGCATCAG       | 841  |
| Sbjct | 800  | <br>TCTATTTTGTGGTTTCTAGGACCATCGTAATGATTAATAGGGACGGTCGGGGGCATCAG   | 859  |
| Query | 842  | TATTCAGTTGTCAGAGGTGAAATTCTTGGATT-ACCTGAAGACTAACTACTGCGAAAGCA      | 900  |
| Sbjct | 860  | <br>TATTCAGTTGTCAGAGGTGAAATTCTTGGATTTAC-TGAAGACTAACTACTGCGAAAGCA  | 918  |
| Query | 901  | TTTGCCAAGGACGTTTTTCATTAATCAAGAACGAAAGTTAGGGGATCGAAGATGATCAGAT     | 960  |
| Sbjct | 919  | <br>TTTGCCAAGGACGTTTTTCATTAATCAAGAACGAAAGTTAGGGGATCGAAGATGATCAGAT | 978  |
| Query | 961  | ACCGTCGTAGTCTTAACCATAAACTATGCCGACTAGGGATCGGGTGGTTCtttttttG        | 1020 |
| Sbjct | 979  | <br>ACCGTCGTAGTCTTAACCATAAACTATGCCGACTAGGGATCGGGTGGTTCTTTTTTTG    | 1038 |
| Query | 1021 | ACGCACTCGGCACCTTACGAGAAATCAAAGTCTTTGGGTTCTGGGGGAGTATGGTCGCA       | 1080 |
| Sbjct | 1039 | <br>ACGCACTCGGCACCTTACGAGAAATCAAAGTCTTTGGGTTCTGGGGGAGTATGGTCGCA   | 1098 |
| Query | 1081 | AGGCTGAAACTTAAAGGAATTGACGGAAGGGCACCACCAGGAGTGGAGCCTGCGGCTTAA      | 1140 |
| Sbjct | 1099 | <br>AGGCTGAAACTTAAAGGAATTGACGGAAGGGCACCACCAGGAGTGGAGCCTGCGGCTTAA  | 1158 |
| Query | 1141 | TTTGACTCAACACGGGAAACTCACCAGGTCCAGACACAATAAGGATTGACAGATTGAGA       | 1200 |
| Sbjct | 1159 | <br>TTTGACTCAACACGGGAAACTCACCAGGTCCAGACACAATAAGGATTGACAGATTGAGA   | 1218 |
| Query | 1201 | GCTCTTCTTGATTTTGTGGGTGGTGGTGCATGGCCGTTCTTAGTTGGTGGAGTGATTTG       | 1260 |

|       |      |                                                                  |      |
|-------|------|------------------------------------------------------------------|------|
| Sbjct | 1219 | <br>GCTCTTTCTTGATTTTGTGGGTGGTGGTGCATGGCCGTTCTTAGTTGGTGGAGTGATTTG | 1278 |
| Query | 1261 | TCTGCTTAATTGCGATAACGAACGAGACCTAACCTACTAAATAGTGCTGCTAGCTTTTG      | 1320 |
| Sbjct | 1279 | <br>TCTACTTAATTGTGATAACGAACGAGACCTAACCTACTAAATAGTGCTGCTAGCTTTTG  | 1338 |
| Query | 1321 | CTGGTATAGTCACTTCTTAGAGGGACTATCGATTTCAAGTCGATGGAAGTTTGAGGCAAT     | 1380 |
| Sbjct | 1339 | <br>CTGGTATAGTCACTTCTTAGAGGGACTATCGATTTCAAGTCGATGGAAGTTTGAGGCAAT | 1398 |
| Query | 1381 | AACAGGTCTGTGATGCCCTTAGACGTTCTGGGCCGCACGCGCGCTACACTGACGGAGCCA     | 1440 |
| Sbjct | 1399 | <br>AACAGGTCTGTGATGCCCTTAGACGTTCTGGGCCGCACGCGCGCTACACTGACGGAGCCA | 1458 |
| Query | 1441 | ACGAGTATTAACCTTGGCCGAGAGGTCTGGGAAATCTTGTGAAACTCCGTCGTGCTGGGG     | 1500 |
| Sbjct | 1459 | <br>GCGAGTATTAACCTTGGCCGAGAGGTCTGGGAAATCTTGTGAAACTCCGTCGTGCTGGGG | 1518 |
| Query | 1501 | ATAGAGCATTGTAATTATTGCTCTTCAACGAGGAATTCCTAGTAAGCGCAAGTCATCAGC     | 1560 |
| Sbjct | 1519 | <br>ATAGAGCATTGTAATTATTGCTCTTCAACGAGGAATTCCTAGTAAGCGCAAGTCATCAGC | 1578 |
| Query | 1561 | TTGCGTTGATTACGTCCCTGCCCTTTGTACACACCGCCCGTCGCTACTACCGATTGAATG     | 1620 |
| Sbjct | 1579 | <br>TTGCGTTGATTACGTCCCTGCCCTTTGTACACACCGCCCGTCGCTACTACCGATTGAATG | 1638 |
| Query | 1621 | GCTTAGTGAGGCCTCCGGATTGGTTTAAAGAAGGGGGCAACTCCATCTTGGAAACCGAAAA    | 1680 |
| Sbjct | 1639 | <br>GCTTAGTGAGGCCTCCGGATTGGTTTAAAGAAGGGGGCAACTCCATCTTGGAACTGAAAA | 1698 |
| Query | 1681 | GCTGGTCAAACCTTGGTCATTTAGAGGAAGTAAAAGTCGTAACAAGGTTTCCGTAG         | 1735 |
| Sbjct | 1699 | <br>GTTGGTCAAACCTTGGTCATTTAGAGGAAGTAAAAGTCGTAACAAGGTTTCCGTAG     | 1753 |

>gb|DQ499512.1| Candida sp. ny4e 18S ribosomal RNA gene, partial sequence  
Length=1735

Score = 3077 bits (1666), Expect = 0.0  
Identities = 1706/1723 (99%), Gaps = 11/1723 (0%)  
Strand=Plus/Plus

|       |     |                                                                   |     |
|-------|-----|-------------------------------------------------------------------|-----|
| Query | 3   | GCCATGCATGTCTAAGTATAAGCAATTTATACAGTGAAACTGCGAATGGCTCATTAAATC      | 62  |
| Sbjct | 12  | <br>GCCATGCATGTCTAAGTATAAGCAATTTATACAGTGAAACTGCGAATGGCTCATTAAATC  | 71  |
| Query | 63  | AGTTATCGTTTATTTGATAGTACCTTTACTACTTGGATAACCGTGGTAATTCTAGAGCTA      | 122 |
| Sbjct | 72  | <br>AGTTATCGTTTATTTGATAGTACCTTTACTACTTGGATAACCGTGGTAATTCTAGAGCTA  | 131 |
| Query | 123 | ATACATGCTAAAAATCCCGACTGTTTGAAGGGATGTATTTATTAGATAAAAAATCAATG       | 182 |
| Sbjct | 132 | <br>ATACATGCTAAAAATCCCGACTGTTTGAAGGGATGTATTTATTAGATAAAAAATCAATG   | 191 |
| Query | 183 | CT-TTTCGGAGCTCTTTGATGATTCATAATAACTTTTTCGAATCGCATGGCCTTGTGCTGG     | 241 |
| Sbjct | 192 | <br>CTCTTT--GAGCTCTTTGATGATTCATAATAACTTTTTCGAATCGCATGGCCTTGTGCTGG | 249 |
| Query | 242 | CGATGGTTCATTCAAATTTCTGCCCTATCAACTTTTCGATGGTAGGATAGTGGCCTACCAT     | 301 |
| Sbjct | 250 | <br>CGATGGTTCATTCAAATTTCTGCCCTATCAACTTTTCGATGGTAGGATAGTGGCCTACCAT | 309 |
| Query | 302 | GGTTTCAACGGGTAACGGGGAATAAGGGTTCGATTCCGGAGAGGGAGCCTGAGAAACGGC      | 361 |

|       |      |                                                                   |      |
|-------|------|-------------------------------------------------------------------|------|
| Sbjct | 310  | <br>GGTTTCAACGGGTAACGGGGAATAAGGGTTCGATTCCGGAGAGGGAGCCTGAGAAACGGC  | 369  |
| Query | 362  | TACCACATCCAAGGAAGGCAGCAGGCGCGCAAATTACCCAATCCCGACACGGGGAGGTAG      | 421  |
| Sbjct | 370  | <br>TACCACATCCAAGGAAGGCAGCAGGCGCGCAAATTACCCAATCCCGACACGGGGAGGTAG  | 429  |
| Query | 422  | TGACAATAAATAACGATACA-GGGCCCTTTCGGGTCTTGTAATTGGAATGAGTACAATGT      | 480  |
| Sbjct | 430  | <br>TGACAATACATAACGATACAGGGGCCCTTTCGGGTCTTGTAATTGGAATGAGTACAATGT  | 489  |
| Query | 481  | AAATACCTT-AACGAGGAACAATT-GGAGGGCAAGTCTGGTGCCAGCAG-CCGCGGTAAT      | 537  |
| Sbjct | 490  | <br>AAATACCTTAAACGAGGAACAATTGGGAGGGCAAGTCTGGTGCCAGCAGCCCGCGGTAAA  | 549  |
| Query | 538  | TCCAGCTCCAATAGCGTATATTAAGTTGTT-GCAGTTAAAAAGCTCGTAGTTGAACCTT       | 596  |
| Sbjct | 550  | <br>TCCAGCTCCAATAGCGTATATTAAGTTGTTGGCAGTTAAAAAGCTCGTAGTTGAACCTT   | 609  |
| Query | 597  | GGGCTTGGTTGGCCGGTCCGCCTTTTTGGCGAGTACTGGACCCAACCGAGCCTTTCCTTC      | 656  |
| Sbjct | 610  | <br>GGGCTTGGTTGGCCGGTCCGCCTTTTTGGCGAGTACTGGACCCAACCGAGCCTTTCCTTC  | 669  |
| Query | 657  | TGGCTAACCTTTCGCCCTTGTGGTGTGGCGAACCAGGACTTTTACTTTGAAAAATTA         | 716  |
| Sbjct | 670  | <br>TGGCTAACCATTCGCCCTTGTGGTGTGGCGAACCAGGACTTTTACTTTGAAAAATTA     | 729  |
| Query | 717  | GAGTGTTCAAAGCAGGCCTTTGCTCGAATATATTAGCATGGAATAATAGAATAGGACGTT      | 776  |
| Sbjct | 730  | <br>GAGTGTTCAAAGCAGGCCTTTGCTCGAATATATTAGCATGGAATAATAGAATAGGACGTT  | 789  |
| Query | 777  | ATGGTTCTATTTTGTGGTTTCTAGGACCATCGTAATGATTAATAGGGACGGTCGGGGGC       | 836  |
| Sbjct | 790  | <br>ATGGTTCTATTTTGTGGTTTCTAGGACCATCGTAATGATTAATAGGGACGGTCGGGGGC   | 849  |
| Query | 837  | ATCAGTATTCAGTTGTCAGAGGTGAAATTCCTTGGG-TTACCTGAAGACTAACTACTGCGA     | 895  |
| Sbjct | 850  | <br>ATCAGTATTCAGTTGTCAGAGGTGAAATTCCTTAGATTTA-CTGAAGACTAACTACTGCGA | 908  |
| Query | 896  | AAGCATTTGCCAAGGACGTTTTTCATTAATCAAGAACGAAAGTTAGGGGATCGAAGATGAT     | 955  |
| Sbjct | 909  | <br>AAGCATTTGCCAAGGACGTTTTTCATTAATCAAGAACGAAAGTTAGGGGATCGAAGATGAT | 968  |
| Query | 956  | CAGATACCGTCGTAGTCTTAACCATAAACTATGCCGACTAGGGATCGGGTGTGTTCTttt      | 1015 |
| Sbjct | 969  | <br>CAGATACCGTCGTAGTCTTAACCATAAACTATGCCGACTAGGGATCGGGTGTGTTCTTTT  | 1028 |
| Query | 1016 | ttttGACGCACTCGGCACCTTACGAGAAATCAAAGTCTTTGGGTCTGGGGGAGTATGG        | 1075 |
| Sbjct | 1029 | <br>TTTTGACGCACTCGGCACCTTACGAGAAATCAAAGTCTTTGGGTCTGGGGGAGTATGG    | 1088 |
| Query | 1076 | TCGCAAGGCTGAAACTTAAAGGAATTGACGGAAGGGCACCACCAGGAGTGGAGCCTGCGG      | 1135 |
| Sbjct | 1089 | <br>TCGCAAGGCTGAAACTTAAAGGAATTGACGGAAGGGCACCACCAGGAGTGGAGCCTGCGG  | 1148 |
| Query | 1136 | CTTAATTTGACTCAACACGGGGAAACTCACCAGGTCCAGACACAATAAGGATTGACAGAT      | 1195 |
| Sbjct | 1149 | <br>CTTAATTTGACTCAACACGGGGAAACTCACCAGGTCCAGACACAATAAGGATTGACAGAT  | 1208 |
| Query | 1196 | TGAGAGCTCTTCTTGATTTTGTGGGTGGTGGTGCATGGCCGTTCTTAGTTGGTGGAGTG       | 1255 |
| Sbjct | 1209 | <br>TGAGAGCTCTTCTTGATTTTGTGGGTGGTGGTGCATGGCCGTTCTTAGTTGGTGGAGTG   | 1268 |
| Query | 1256 | ATTTGTCTGCTTAATTGCGATAACGAACGAGACCTTAACCTACTAAATAGTGCTGCTAGC      | 1315 |

|       |      |                                                                   |      |
|-------|------|-------------------------------------------------------------------|------|
| Sbjct | 1269 | <br>ATTTGTCTGCTTAATTGCGATAACGAACGAGACCTTAACCTACTAAATAGTGCTGCTAGC  | 1328 |
| Query | 1316 | TTTTGCTGGTATAGTCACCTTCTTAGAGGGACTATCGATTTCAAGTCGATGGAAGTTTGAG     | 1375 |
| Sbjct | 1329 | <br>TTTTGCTGGTATAGTCACCTTCTTAGAGGGACTATCGATTTCAAGTCGATGGAAGTTTGAG | 1388 |
| Query | 1376 | GCAATAACAGGTCTGTGATGCCCTTAGACGTTCTGGGCCGCACGCGCTACACTGACGG        | 1435 |
| Sbjct | 1389 | <br>GCAATAACAGGTCTGTGATGCCCTTAGACGTTCTGGGCCGCACGCGCTACACTGACGG    | 1448 |
| Query | 1436 | AGCCAACGAGTATTAACCTTGGCCGAGAGGTCTGGGAAATCTTGTGAAACTCCGTCGTGC      | 1495 |
| Sbjct | 1449 | <br>AGCCAGCGAGTATTAACCTTGGCCGAGAGGTCTGGGAAATCTTGTGAAACTCCGTCGTGC  | 1508 |
| Query | 1496 | TGGGGATAGAGCATTGTAATTATTGCTCTTCAACGAGGAATTCCTAGTAAGCGCAAGTCA      | 1555 |
| Sbjct | 1509 | <br>TGGGGATAGAGCATTGTAATTATTGCTCTTCAACGAGGAATTCCTAGTAAGCGCAAGTCA  | 1568 |
| Query | 1556 | TCAGCTTGCGTTGATTACGTCCCTGCCCTTGTACACACCGCCCGTCGCTACTACCGATT       | 1615 |
| Sbjct | 1569 | <br>TCAGCTTGCGTTGATTACGTCCCTGCCCTTGTACACACCGCCCGTCGCTACTACCGATT   | 1628 |
| Query | 1616 | GAATGGCTTAGTGAGGCCTCCGGATTGGTTTAAAGAAGGGGGCAACTCCATCTTGGAACC      | 1675 |
| Sbjct | 1629 | <br>GAATGGCTTAGTGAGGCCTCCGGATTGGTTTAAAGAAGGGGGCAACTCCATCTTGGAACC  | 1688 |
| Query | 1676 | GAAAAGCTGGTCAAACCTTGGTCATTTAGAGGAAGTAAAAGTCG                      | 1718 |
| Sbjct | 1689 | <br>GAAAAGCTGGTCAAACCTTGGTCATT-AGAGGAAGTAAAAGTCG                  | 1730 |

>gb|DQ438179.1| Candida sp. N12C 18S ribosomal RNA gene, partial sequence  
Length=1735

Score = 3077 bits (1666), Expect = 0.0  
Identities = 1706/1723 (99%), Gaps = 11/1723 (0%)  
Strand=Plus/Plus

|       |     |                                                                  |     |
|-------|-----|------------------------------------------------------------------|-----|
| Query | 3   | GCCATGCATGTCTAAGTATAAGCAATTTATACAGTGAAACTGCGAATGGCTCATTAAATC     | 62  |
| Sbjct | 12  | <br>GCCATGCATGTCTAAGTATAAGCAATTTATACAGTGAAACTGCGAATGGCTCATTAAATC | 71  |
| Query | 63  | AGTTATCGTTTATTTGATAGTACCTTTACTACTTGGATAACCGTGGTAATTCTAGAGCTA     | 122 |
| Sbjct | 72  | <br>AGTTATCGTTTATTTGATAGTACCTTTACTACTTGGATAACCGTGGTAATTCTAGAGCTA | 131 |
| Query | 123 | ATACATGCTAAAAATCCCGACTGTTTGAAGGGATGTATTTATTAGATAAAAAATCAATG      | 182 |
| Sbjct | 132 | <br>ATACATGCTAAAAATCCCGACTGTTTGAAGGGATGTATTTATTAGATAAAAAATCAATG  | 191 |
| Query | 183 | CT-TTTCGGAGCTCTTTGATGATTCATAATAACTTTTCGAATCGCATGGCCTTGTGCTGG     | 241 |
| Sbjct | 192 | <br>CTCTTT--GAGCTCTTTGATGATTCATAATAACTTTTCGAATCGCATGGCCTTGTGCTGG | 249 |
| Query | 242 | CGATGGTTCATTCAAATTTCTGCCCTATCAACTTTCGATGGTAGGATAGTGGCCTACCAT     | 301 |
| Sbjct | 250 | <br>CGATGGTTCATTCAAATTTCTGCCCTATCAACTTTCGATGGTAGGATAGTGGCCTACCAT | 309 |
| Query | 302 | GGTTTCAACGGGTAACGGGGAATAAGGGTTCGATTCCGGAGAGGGAGCCTGAGAAACGGC     | 361 |
| Sbjct | 310 | <br>GGTTTCAACGGGTAACGGGGAATAAGGGTTCGATTCCGGAGAGGGAGCCTGAGAAACGGC | 369 |
| Query | 362 | TACCACATCCAAGGAAGGCAGCAGGCGCGCAAATTACCAATCCCGACACGGGGAGGTAG      | 421 |

|       |      |                                                                   |      |
|-------|------|-------------------------------------------------------------------|------|
| Sbjct | 370  | <br>TACCACATCCAAGGAAGGCAGCAGGCGCGCAAATTACCCAATCCCGACACGGGGAGGTAG  | 429  |
| Query | 422  | TGACAATAAATAACGATACA-GGGCCCTTTCGGGTCTTGTAATTGGAATGAGTACAATGT      | 480  |
| Sbjct | 430  | <br>TGACAATAACATAACGATACAGGGGCCCTTTCGGGTCTTGTAATTGGAATGAGTACAATGT | 489  |
| Query | 481  | AAATACCTT-AACGAGGAACAATT-GGAGGGCAAGTCTGGTGCCAGCAG-CCGCGGTAAT      | 537  |
| Sbjct | 490  | AAATACCTTAAACGAGGAACAATTGGGAGGGCAAGTCTGGTGCCAGCAGCCCGCGGTAAA      | 549  |
| Query | 538  | TCCAGCTCCAATAGCGTATATTTAAAGTTGTT-GCAGTTAAAAAGCTCGTAGTTGAACCTT     | 596  |
| Sbjct | 550  | <br>TCCAGCTCCAATAGCGTATATTTAAAGTTGTTGGCAGTTAAAAAGCTCGTAGTTGAACCTT | 609  |
| Query | 597  | GGGCTTGGTTGGCCGGTCCGCCTTTTTGGCGAGTACTGGACCCAACCGAGCCTTTCCTTC      | 656  |
| Sbjct | 610  | GGGCTTGGTTGGCCGGTCCGCCTTTTTGGCGAGTACTGGACCCAACCGAGCCTTTCCTTC      | 669  |
| Query | 657  | TGGCTAACCTTTCGCCCTTGTGGTGTGGCGAACCAGGACTTTTACTTTGAAAAATTA         | 716  |
| Sbjct | 670  | <br>TGGCTAACCATTCGCCCTTGTGGTGTGGCGAACCAGGACTTTTACTTTGAAAAATTA     | 729  |
| Query | 717  | GAGTGTTCAAAGCAGGCCTTTGCTCGAATATATTAGCATGGAATAATAGAATAGGACGTT      | 776  |
| Sbjct | 730  | <br>GAGTGTTCAAAGCAGGCCTTTGCTCGAATATATTAGCATGGAATAATAGAATAGGACGTT  | 789  |
| Query | 777  | ATGGTTCTATTTTGTGGTTTCTAGGACCATCGTAATGATTAATAGGGACGGTCGGGGGC       | 836  |
| Sbjct | 790  | <br>ATGGTTCTATTTTGTGGTTTCTAGGACCATCGTAATGATTAATAGGGACGGTCGGGGGC   | 849  |
| Query | 837  | ATCAGTATTCAGTTGTCAGAGGTGAAATTCCTTGA-TTACCTGAAGACTAACTACTGCGA      | 895  |
| Sbjct | 850  | <br>ATCAGTATTCAGTTGTCAGAGGTGAAATTCCTTAGATTTA-CTGAAGACTAACTACTGCGA | 908  |
| Query | 896  | AAGCATTTGCCAAGGACGTTTTTCATTAATCAAGAACGAAAGTTAGGGGATCGAAGATGAT     | 955  |
| Sbjct | 909  | <br>AAGCATTTGCCAAGGACGTTTTTCATTAATCAAGAACGAAAGTTAGGGGATCGAAGATGAT | 968  |
| Query | 956  | CAGATACCGTCGTAGTCTTAACCATAAACTATGCCGACTAGGGATCGGGTGTGTTCTttt      | 1015 |
| Sbjct | 969  | <br>CAGATACCGTCGTAGTCTTAACCATAAACTATGCCGACTAGGGATCGGGTGTGTTCTTT   | 1028 |
| Query | 1016 | ttttGACGCACTCGGCACCTTACGAGAAATCAAAGTCTTTGGGTCTGGGGGAGTATGG        | 1075 |
| Sbjct | 1029 | <br>TTTTGACGCACTCGGCACCTTACGAGAAATCAAAGTCTTTGGGTCTGGGGGAGTATGG    | 1088 |
| Query | 1076 | TCGCAAGGCTGAAACTTAAAGGAATTGACGGAAGGGCACCACCAGGAGTGGAGCCTGCGG      | 1135 |
| Sbjct | 1089 | <br>TCGCAAGGCTGAAACTTAAAGGAATTGACGGAAGGGCACCACCAGGAGTGGAGCCTGCGG  | 1148 |
| Query | 1136 | CTTAATTTGACTCAACACGGGGAAACTCACCAGGTCCAGACACAATAAGGATTGACAGAT      | 1195 |
| Sbjct | 1149 | <br>CTTAATTTGACTCAACACGGGGAAACTCACCAGGTCCAGACACAATAAGGATTGACAGAT  | 1208 |
| Query | 1196 | TGAGAGCTCTTCTTGATTTTGTGGGTGGTGGTGCATGGCCGTTCTTAGTTGGTGGAGTG       | 1255 |
| Sbjct | 1209 | <br>TGAGAGCTCTTCTTGATTTTGTGGGTGGTGGTGCATGGCCGTTCTTAGTTGGTGGAGTG   | 1268 |
| Query | 1256 | ATTTGTCTGCTTAATTGCGATAACGAACGAGACCTTAACCTACTAAATAGTGCTGCTAGC      | 1315 |
| Sbjct | 1269 | <br>ATTTGTCTGCTTAATTGCGATAACGAACGAGACCTTAACCTACTAAATAGTGCTGCTAGC  | 1328 |
| Query | 1316 | TTTTGCTGGTATAGTCACTTCTTAGAGGGACTATCGATTTCAAGTCGATGGAAGTTTGAG      | 1375 |

```

Sbjct 1329 |||...||| TTTTGCTGGTATAGTCACTTCTTAGAGGGACTATCGATTTCAAGTCGATGGAAGTTTGAG 1388
Query 1376 GCAATAACAGGTCTGTGATGCCCTTAGACGTTCTGGGCCGCACGCGCTACACTGACGG 1435
Sbjct 1389 |||...||| GCAATAACAGGTCTGTGATGCCCTTAGACGTTCTGGGCCGCACGCGCTACACTGACGG 1448
Query 1436 AGCCAACGAGTATTAACCTTGGCCGAGAGGTCTGGGAAATCTTGTGAAACTCCGTCTGTC 1495
Sbjct 1449 |||...||| AGCCAGCGAGTATTAACCTTGGCCGAGAGGTCTGGGAAATCTTGTGAAACTCCGTCTGTC 1508
Query 1496 TGGGGATAGAGCATTGTAATTATTGCTCTTCAACGAGGAATTCCTAGTAAGCGCAAGTCA 1555
Sbjct 1509 |||...||| TGGGGATAGAGCATTGTAATTATTGCTCTTCAACGAGGAATTCCTAGTAAGCGCAAGTCA 1568
Query 1556 TCAGCTTGCGTTGATTACGTCCCTGCCCTTTGTACACACCGCCCGTCGCTACTACCGATT 1615
Sbjct 1569 |||...||| TCAGCTTGCGTTGATTACGTCCCTGCCCTTTGTACACACCGCCCGTCGCTACTACCGATT 1628
Query 1616 GAATGGCTTAGTGAGGCCTCCGGATTGGTTTAAAGAAGGGGGCAACTCCATCTTGGAACC 1675
Sbjct 1629 |||...||| GAATGGCTTAGTGAGGCCTCCGGATTGGTTTAAAGAAGGGGGCAACTCCATCTTGGAACC 1688
Query 1676 GAAAAGCTGGTCAAACCTGGTCATTTAGAGGAAGTAAAAGTCG 1718
Sbjct 1689 |||...||| GAAAAGCTGGTCAAACCTGGTCATT-AGAGGAAGTAAAAGTCG 1730

```

Database: All GenBank+EMBL+DDBJ+PDB sequences (but no EST, STS, GSS, environmental samples or phase 0, 1 or 2 HTGS sequences)

Posted date: Jun 26, 2010 5:44 PM

Number of letters in database: 1,817,769,445

Number of sequences in database: 12,090,198

```

Lambda      K      H
1.33      0.621  1.12

```

Gapped

```

Lambda      K      H
1.28      0.460  0.850

```

Matrix: blastn matrix:1 -2

Gap Penalties: Existence: 0, Extension: 0

Number of Sequences: 12090198

Number of Hits to DB: 8629390

Number of extensions: 69897

Number of successful extensions: 69897

Number of sequences better than 10: 36836

Number of HSP's better than 10 without gapping: 0

Number of HSP's gapped: 57168

Number of HSP's successfully gapped: 57081

Length of query: 2961

Length of database: 31882540517

Length adjustment: 34

Effective length of query: 2927

Effective length of database: 31471473785

Effective search space: 92117003768695

Effective search space used: 92117003768695

A: 0

X1: 15 (28.8 bits)

X2: 32 (59.1 bits)

X3: 54 (99.7 bits)

S1: 15 (28.8 bits)

S2: 23 (43.6 bits)





BLASTN 2.2.23+

Reference: Zheng Zhang, Scott Schwartz, Lukas Wagner, and Webb Miller (2000), "A greedy algorithm for aligning DNA sequences", J Comput Biol 2000; 7(1-2):203-14.

RID: 2DDABPEZ014

Database: All GenBank+EMBL+DDBJ+PDB sequences (but no EST, STS, GSS, environmental samples or phase 0, 1 or 2 HTGS sequences)

12,090,198 sequences; 31,882,540,517 total letters

Query= gi|65306735|gb|AY939792.1| Pichia guilliermondii strain ATCC 6260 18S ribosomal RNA gene, partial sequence; internal transcribed spacer 1, 5.8S ribosomal RNA gene, and internal transcribed spacer 2, complete sequence; and 28S ribosomal RNA gene, partial sequence  
Length=607

| Sequences producing significant alignments: |                                                  |                 |      |      |     | Score  | E     |
|---------------------------------------------|--------------------------------------------------|-----------------|------|------|-----|--------|-------|
|                                             |                                                  |                 |      |      |     | (Bits) | Value |
| gb EU568967.1                               | Pichia guilliermondii isolate                    | CNRMA 200600032 | ...  | 1122 | 0.0 |        |       |
| gb EU568965.1                               | Pichia guilliermondii isolate                    | CNRMA 200600130 | ...  | 1122 | 0.0 |        |       |
| gb EU568963.1                               | Pichia guilliermondii isolate                    | CNRMA 200600335 | ...  | 1122 | 0.0 |        |       |
| gb EU568961.1                               | Pichia guilliermondii isolate                    | CNRMA 200600561 | ...  | 1122 | 0.0 |        |       |
| gb EU568959.1                               | Pichia guilliermondii isolate                    | CNRMA 200600938 | ...  | 1122 | 0.0 |        |       |
| gb EU568957.1                               | Pichia guilliermondii isolate                    | CNRMA 200601010 | ...  | 1122 | 0.0 |        |       |
| gb EU568955.1                               | Pichia guilliermondii isolate                    | CNRMA 200601023 | ...  | 1122 | 0.0 |        |       |
| gb EU568953.1                               | Pichia guilliermondii isolate                    | CNRMA 200700041 | ...  | 1122 | 0.0 |        |       |
| gb EU568951.1                               | Pichia guilliermondii isolate                    | CNRMA 200700261 | ...  | 1122 | 0.0 |        |       |
| gb EU568949.1                               | Pichia guilliermondii isolate                    | CNRMA 200700329 | ...  | 1122 | 0.0 |        |       |
| gb EU568947.1                               | Pichia guilliermondii isolate                    | CNRMA 200500030 | ...  | 1122 | 0.0 |        |       |
| gb EU568945.1                               | Pichia guilliermondii isolate                    | CNRMA 200500086 | ...  | 1122 | 0.0 |        |       |
| gb EU568943.1                               | Pichia guilliermondii isolate                    | CNRMA 200500816 | ...  | 1122 | 0.0 |        |       |
| gb EU568941.1                               | Pichia guilliermondii isolate                    | CNRMA 200500861 | ...  | 1122 | 0.0 |        |       |
| gb EU568939.1                               | Pichia guilliermondii isolate                    | CNRMA 200501141 | ...  | 1122 | 0.0 |        |       |
| gb EU568937.1                               | Pichia guilliermondii isolate                    | CNRMA 200501142 | ...  | 1122 | 0.0 |        |       |
| gb EU568935.1                               | Pichia guilliermondii isolate                    | CNRMA 200501144 | ...  | 1122 | 0.0 |        |       |
| gb EU568933.1                               | Pichia guilliermondii isolate                    | CNRMA 200501305 | ...  | 1122 | 0.0 |        |       |
| gb EU568931.1                               | Pichia guilliermondii isolate                    | CNRMA 200501314 | ...  | 1122 | 0.0 |        |       |
| gb EU568929.1                               | Pichia guilliermondii isolate                    | CNRMA 200501320 | ...  | 1122 | 0.0 |        |       |
| gb EU568911.1                               | Pichia guilliermondii 18S ribosomal RNA gene,    | ...             | 1122 | 0.0  |     |        |       |
| dbj AB369917.1                              | Pichia guilliermondii genes for small subunit... | ...             | 1122 | 0.0  |     |        |       |
| gb EU177579.1                               | Pichia guilliermondii strain EQ 18S ribosomal    | ...             | 1122 | 0.0  |     |        |       |
| gb EF191048.1                               | Pichia guilliermondii strain HJM 18S ribosomal   | ...             | 1122 | 0.0  |     |        |       |
| gb DQ663478.1                               | Pichia guilliermondii isolate JHsd 18S ribosom   | ...             | 1122 | 0.0  |     |        |       |
| gb DQ680842.1                               | Pichia guilliermondii strain G7A1 18S ribosoma   | ...             | 1122 | 0.0  |     |        |       |
| gb AY939795.1                               | Pichia guilliermondii isolate UR 9406-03 18S r   | ...             | 1122 | 0.0  |     |        |       |
| gb AY939792.1                               | Pichia guilliermondii strain ATCC 6260 18S rib   | ...             | 1122 | 0.0  |     |        |       |
| gb GU385845.1                               | Pichia guilliermondii strain SMB 18S ribosomal   | ...             | 1120 | 0.0  |     |        |       |
| gb GQ334393.1                               | Pichia guilliermondii isolate SD 337 18S ribos   | ...             | 1116 | 0.0  |     |        |       |
| gb FJ969194.1                               | Pichia guilliermondii strain UAF-214 18S ribos   | ...             | 1116 | 0.0  |     |        |       |
| gb EU568993.1                               | Pichia guilliermondii isolate CNRMA 200500950    | ...             | 1116 | 0.0  |     |        |       |
| gb EU568991.1                               | Pichia guilliermondii isolate CNRMA 200501319    | ...             | 1116 | 0.0  |     |        |       |
| gb EU568989.1                               | Pichia guilliermondii isolate CNRMA 200501343    | ...             | 1116 | 0.0  |     |        |       |
| gb EU568987.1                               | Pichia guilliermondii isolate CNRMA 200600803    | ...             | 1116 | 0.0  |     |        |       |
| gb EU568985.1                               | Pichia guilliermondii isolate CNRMA 200601042    | ...             | 1116 | 0.0  |     |        |       |
| gb EU568983.1                               | Pichia guilliermondii isolate CNRMA 200500719    | ...             | 1116 | 0.0  |     |        |       |
| gb EU568981.1                               | Pichia guilliermondii isolate CNRMA 200601191    | ...             | 1116 | 0.0  |     |        |       |
| gb EU568979.1                               | Pichia guilliermondii isolate CNRMA 200700040    | ...             | 1116 | 0.0  |     |        |       |
| gb EU568977.1                               | Pichia guilliermondii isolate CNRMA 200500809    | ...             | 1116 | 0.0  |     |        |       |
| gb EU568975.1                               | Pichia guilliermondii isolate CNRMA 200500821    | ...             | 1116 | 0.0  |     |        |       |
| gb EU568973.1                               | Pichia guilliermondii isolate CNRMA 200500863    | ...             | 1116 | 0.0  |     |        |       |

|                |                                                                  |      |     |
|----------------|------------------------------------------------------------------|------|-----|
| gb EU568971.1  | <i>Pichia guilliermondii</i> isolate CNRMA 200500864 ...         | 1116 | 0.0 |
| gb DQ663480.1  | <i>Pichia guilliermondii</i> isolate hn-3 18S ribosom...         | 1116 | 0.0 |
| gb DQ663479.1  | <i>Pichia guilliermondii</i> isolate hn-2 18S ribosom...         | 1116 | 0.0 |
| gb GQ913349.1  | <i>Pichia guilliermondii</i> strain W1171 18S ribosom...         | 1110 | 0.0 |
| gb GQ497898.1  | <i>Pichia guilliermondii</i> strain PX-PAT 18S riboso...         | 1110 | 0.0 |
| gb GQ149493.1  | <i>Pichia guilliermondii</i> strain UAF-130 18S ribos...         | 1110 | 0.0 |
| gb FJ662408.1  | <i>Pichia guilliermondii</i> isolate ZA043 18S riboso...         | 1110 | 0.0 |
| gb EU568969.1  | <i>Pichia guilliermondii</i> isolate CNRMA 200501202 ...         | 1110 | 0.0 |
| gb AF209874.1  | AF209874 <i>Debaryomyces hansenii</i> var. <i>fabryi</i> CBS8... | 1110 | 0.0 |
| gb FJ515205.1  | <i>Pichia guilliermondii</i> strain UN44 18S ribosoma...         | 1109 | 0.0 |
| gb DQ663476.1  | <i>Pichia guilliermondii</i> isolate L2-8 18S ribosom...         | 1109 | 0.0 |
| gb EF643576.1  | <i>Pichia guilliermondii</i> strain S0201 18S ribosom...         | 1107 | 0.0 |
| gb EF222224.1  | <i>Pichia guilliermondii</i> strain WC43-1 18S riboso...         | 1107 | 0.0 |
| gb EF375704.1  | <i>Pichia guilliermondii</i> strain N12c 18S ribosoma...         | 1107 | 0.0 |
| gb AY700139.1  | Fungal endophyte sp. CEY 20 18S small subunit ...                | 1107 | 0.0 |
| gb GQ149494.1  | <i>Pichia guilliermondii</i> strain UAF-62 18S riboso...         | 1105 | 0.0 |
| gb EF532299.1  | <i>Pichia guilliermondii</i> strain JHSa 18S ribosoma...         | 1105 | 0.0 |
| gb EF197814.1  | <i>Pichia guilliermondii</i> strain HK53 18S ribosoma...         | 1105 | 0.0 |
| gb DQ683005.1  | <i>Pichia guilliermondii</i> strain L11-2 18S ribosom...         | 1105 | 0.0 |
| emb AM176627.1 | <i>Pichia guilliermondii</i> 18S rRNA gene, 5.8S rRN...          | 1105 | 0.0 |
| gb AY700141.1  | Fungal endophyte sp. CEY 22 18S small subunit ...                | 1105 | 0.0 |
| gb GQ280287.1  | <i>Pichia guilliermondii</i> isolate ZA016 18S riboso...         | 1103 | 0.0 |
| gb EF222226.1  | <i>Pichia guilliermondii</i> strain HK55a 18S ribosom...         | 1101 | 0.0 |
| gb EF190233.1  | <i>Pichia guilliermondii</i> strain 3-2 18S ribosomal...         | 1101 | 0.0 |
| gb EF192233.1  | <i>Pichia guilliermondii</i> strain gaozhong 18S ribo...         | 1101 | 0.0 |
| gb EF193071.1  | <i>Pichia guilliermondii</i> voucher MCCC2E00277 18S ...         | 1101 | 0.0 |
| gb DQ668353.1  | <i>Pichia guilliermondii</i> isolate L4-1 18S ribosom...         | 1101 | 0.0 |
| gb FJ515181.1  | <i>Pichia guilliermondii</i> strain SN4 18S ribosomal...         | 1099 | 0.0 |
| gb EF643595.1  | <i>Pichia guilliermondii</i> strain LN-9 18S ribosoma...         | 1099 | 0.0 |
| gb EF197809.1  | <i>Pichia guilliermondii</i> strain HK51b 18S ribosom...         | 1098 | 0.0 |
| gb DQ663477.1  | <i>Pichia guilliermondii</i> isolate hn-4 18S ribosom...         | 1098 | 0.0 |
| gb DQ534408.1  | <i>Debaryomyces hansenii</i> strain JHSa 18S ribosoma...         | 1098 | 0.0 |
| gb EF197816.1  | <i>Pichia guilliermondii</i> strain NA-3 18S ribosoma...         | 1096 | 0.0 |
| emb FN428931.1 | <i>Pichia caribbica</i> ITS1, 5.8S rRNA gene, ITS2 a...          | 1094 | 0.0 |
| gb GU248264.1  | <i>Pichia caribbica</i> strain XTWJX 18S ribosomal RN...         | 1094 | 0.0 |
| gb FJ183437.1  | <i>Pichia guilliermondii</i> strain VAL-05-030 18S ri...         | 1094 | 0.0 |
| gb FJ183435.1  | <i>Pichia guilliermondii</i> strain VAL-05-015 18S ri...         | 1094 | 0.0 |
| gb EU569029.1  | <i>Pichia caribbica</i> isolate CNRMA 200500812 18S r...         | 1094 | 0.0 |
| gb EU569027.1  | <i>Pichia caribbica</i> isolate CNRMA 200500862 18S r...         | 1094 | 0.0 |
| gb EU569025.1  | <i>Pichia caribbica</i> isolate CNRMA 200501000 18S r...         | 1094 | 0.0 |
| gb EU569023.1  | <i>Pichia caribbica</i> isolate CNRMA 200501146 18S r...         | 1094 | 0.0 |
| gb EU569021.1  | <i>Pichia caribbica</i> isolate CNRMA 200501145 18S r...         | 1094 | 0.0 |
| gb EU569019.1  | <i>Pichia caribbica</i> isolate CNRMA 200501201 18S r...         | 1094 | 0.0 |
| gb EU569017.1  | <i>Pichia caribbica</i> isolate CNRMA 200500949 18S r...         | 1094 | 0.0 |
| gb EU569015.1  | <i>Pichia caribbica</i> isolate CNRMA 200501317 18S r...         | 1094 | 0.0 |
| gb EU569013.1  | <i>Pichia caribbica</i> isolate CNRMA 200600033 18S r...         | 1094 | 0.0 |
| gb EU569011.1  | <i>Pichia caribbica</i> isolate CNRMA 200501316 18S r...         | 1094 | 0.0 |
| gb EU569009.1  | <i>Pichia caribbica</i> isolate CNRMA 200600196 18S r...         | 1094 | 0.0 |
| gb EU569007.1  | <i>Pichia caribbica</i> isolate CNRMA 200600368 18S r...         | 1094 | 0.0 |
| gb EU569005.1  | <i>Pichia caribbica</i> isolate CNRMA 200601082 18S r...         | 1094 | 0.0 |
| gb EU569003.1  | <i>Pichia caribbica</i> isolate CNRMA 200700035 18S r...         | 1094 | 0.0 |
| gb EU569001.1  | <i>Pichia caribbica</i> isolate CNRMA 200700593 18S r...         | 1094 | 0.0 |
| gb EU568913.1  | <i>Pichia caribbica</i> 18S ribosomal RNA gene, parti...         | 1094 | 0.0 |
| gb EF190227.1  | <i>Pichia guilliermondii</i> strain gaolzhong2 18S ri...         | 1094 | 0.0 |
| emb AM158922.1 | <i>Candida xestobii</i> partial 18S rRNA gene, ITS1,...          | 1094 | 0.0 |
| gb DQ249193.1  | <i>Pichia guilliermondii</i> strain WM 02.91 18S ribo...         | 1094 | 0.0 |
| emb FM199963.1 | <i>Pichia caribbica</i> 18S rRNA gene (partial), ITS...          | 1092 | 0.0 |
| gb EU520225.1  | <i>Mycena pura</i> isolate NW473 18S ribosomal RNA ge...         | 1083 | 0.0 |

#### ALIGNMENTS

>gb|EU568967.1| *Pichia guilliermondii* isolate CNRMA 200600032 18S ribosomal RNA gene, partial sequence; internal transcribed spacer 1, 5.8S ribosomal RNA gene, and internal transcribed spacer 2, complete sequence; and 28S ribosomal RNA gene, partial sequence

Length=607

Score = 1122 bits (607), Expect = 0.0  
Identities = 607/607 (100%), Gaps = 0/607 (0%)  
Strand=Plus/Plus

```
Query 1 TCCGTAGGTGAACCTGCGGAAGGATCATTACAGTATTCTTTTGCCAGCGCTTAACTGCGC 60
      |||
Sbjct 1 TCCGTAGGTGAACCTGCGGAAGGATCATTACAGTATTCTTTTGCCAGCGCTTAACTGCGC 60

Query 61 GGCGAAAAACCTTACACACAGTGTCTTTTGATAACAGAACTCTTGCTTTGGTTTGGCCTA 120
      |||
Sbjct 61 GGCGAAAAACCTTACACACAGTGTCTTTTGATAACAGAACTCTTGCTTTGGTTTGGCCTA 120

Query 121 GAGATAGGTTGGGCCAGAGGTTTAACAAAACACAATTTAATTATTTTACAGTTAGTCAA 180
      |||
Sbjct 121 GAGATAGGTTGGGCCAGAGGTTTAACAAAACACAATTTAATTATTTTACAGTTAGTCAA 180

Query 181 ATTTTGAATTAATCTTCAAACCTTTCAACAACGGATCTCTTGGTTCTCGCATCGATGAAG 240
      |||
Sbjct 181 ATTTTGAATTAATCTTCAAACCTTTCAACAACGGATCTCTTGGTTCTCGCATCGATGAAG 240

Query 241 AACGCAGCGAAATGCGATAAGTAATATGAATTGCAGATTTTCGTGAATCATCGAATCTTT 300
      |||
Sbjct 241 AACGCAGCGAAATGCGATAAGTAATATGAATTGCAGATTTTCGTGAATCATCGAATCTTT 300

Query 301 GAACGCACATTGCGCCCTCTGGTATTCCAGAGGGCATGCCTGTTTGAGCGTCATTTCTCT 360
      |||
Sbjct 301 GAACGCACATTGCGCCCTCTGGTATTCCAGAGGGCATGCCTGTTTGAGCGTCATTTCTCT 360

Query 361 CTCAAACCCCCGGGTTTGGTATTGAGTGATACTCTTAGTTCGGACTAGGCGTTTGCTTGAA 420
      |||
Sbjct 361 CTCAAACCCCCGGGTTTGGTATTGAGTGATACTCTTAGTTCGGACTAGGCGTTTGCTTGAA 420

Query 421 AAGTATTGGCATGGGTAGTACTAGATAGTGCTGTTCGACCTCTCAATGTATTAGGTTTATC 480
      |||
Sbjct 421 AAGTATTGGCATGGGTAGTACTAGATAGTGCTGTTCGACCTCTCAATGTATTAGGTTTATC 480

Query 481 CAACTCGTTGAATGGTGTGGCGGGATATTTCTGGTATTGTTGGCCCGGCCTTACAACAAC 540
      |||
Sbjct 481 CAACTCGTTGAATGGTGTGGCGGGATATTTCTGGTATTGTTGGCCCGGCCTTACAACAAC 540

Query 541 CAAACAAGTTTGACCTCAAATCAGGTAGGAATACCCGCTGAACTTAAGCATATCAATAAG 600
      |||
Sbjct 541 CAAACAAGTTTGACCTCAAATCAGGTAGGAATACCCGCTGAACTTAAGCATATCAATAAG 600

Query 601 CGGAGGA 607
      |||
Sbjct 601 CGGAGGA 607
```

>gb|EU568965.1| Pichia guilliermondii isolate CNRMA 200600130 18S ribosomal RNA gene, partial sequence; internal transcribed spacer 1, 5.8S ribosomal RNA gene, and internal transcribed spacer 2, complete sequence; and 28S ribosomal RNA gene, partial sequence  
Length=607

Score = 1122 bits (607), Expect = 0.0  
Identities = 607/607 (100%), Gaps = 0/607 (0%)  
Strand=Plus/Plus

```
Query 1 TCCGTAGGTGAACCTGCGGAAGGATCATTACAGTATTCTTTTGCCAGCGCTTAACTGCGC 60
      |||
Sbjct 1 TCCGTAGGTGAACCTGCGGAAGGATCATTACAGTATTCTTTTGCCAGCGCTTAACTGCGC 60
```

```

Query 61  GCGGAAAAACCTTACACACAGTGTCTTTTTGATACAGAACTCTTGCTTTGGTTTGGCCTA 120
          |||
Sbjct 61  GCGGAAAAACCTTACACACAGTGTCTTTTTGATACAGAACTCTTGCTTTGGTTTGGCCTA 120

Query 121 GAGATAGGTTGGGCCAGAGGTTTAACAAAACACAATTTAATTATTTTACAGTTAGTCAA 180
          |||
Sbjct 121 GAGATAGGTTGGGCCAGAGGTTTAACAAAACACAATTTAATTATTTTACAGTTAGTCAA 180

Query 181 ATTTTGAATTAATCTTCAAACCTTTCAACAACGGATCTCTTGGTTCTCGCATCGATGAAG 240
          |||
Sbjct 181 ATTTTGAATTAATCTTCAAACCTTTCAACAACGGATCTCTTGGTTCTCGCATCGATGAAG 240

Query 241 AACGCAGCGAAATGCGATAAGTAATATGAATTGCAGATTTTCGTGAATCATCGAATCTTT 300
          |||
Sbjct 241 AACGCAGCGAAATGCGATAAGTAATATGAATTGCAGATTTTCGTGAATCATCGAATCTTT 300

Query 301 GAACGCACATTGCGCCCTCTGGTATTCCAGAGGGCATGCCTGTTTGAGCGTCATTTCTCT 360
          |||
Sbjct 301 GAACGCACATTGCGCCCTCTGGTATTCCAGAGGGCATGCCTGTTTGAGCGTCATTTCTCT 360

Query 361 CTCAAACCCCCGGGTTTGGTATTGAGTGATACTCTTAGTCGGACTAGGCGTTTGCTTGAA 420
          |||
Sbjct 361 CTCAAACCCCCGGGTTTGGTATTGAGTGATACTCTTAGTCGGACTAGGCGTTTGCTTGAA 420

Query 421 AAGTATTGGCATGGGTAGTACTAGATAGTGCTGTGACCTCTCAATGTATTAGGTTTATC 480
          |||
Sbjct 421 AAGTATTGGCATGGGTAGTACTAGATAGTGCTGTGACCTCTCAATGTATTAGGTTTATC 480

Query 481 CAACTCGTTGAATGGTGTGGCGGGATATTTCTGGTATTGTTGGCCCGGCCTTACAACAAC 540
          |||
Sbjct 481 CAACTCGTTGAATGGTGTGGCGGGATATTTCTGGTATTGTTGGCCCGGCCTTACAACAAC 540

Query 541 CAAACAAGTTTGACCTCAAATCAGGTAGGAATACCCGCTGAACTTAAGCATATCAATAAG 600
          |||
Sbjct 541 CAAACAAGTTTGACCTCAAATCAGGTAGGAATACCCGCTGAACTTAAGCATATCAATAAG 600

Query 601 CGGAGGA 607
          |||
Sbjct 601 CGGAGGA 607

```

>gb|EU568963.1| Pichia guilliermondii isolate CNRMA 200600335 18S ribosomal RNA gene, partial sequence; internal transcribed spacer 1, 5.8S ribosomal RNA gene, and internal transcribed spacer 2, complete sequence; and 28S ribosomal RNA gene, partial sequence  
Length=607

Score = 1122 bits (607), Expect = 0.0  
Identities = 607/607 (100%), Gaps = 0/607 (0%)  
Strand=Plus/Plus

```

Query 1  TCCGTAGGTGAACCTGCGGAAGGATCATTACAGTATTCTTTTGCCAGCGCTTAACTGCGC 60
          |||
Sbjct 1  TCCGTAGGTGAACCTGCGGAAGGATCATTACAGTATTCTTTTGCCAGCGCTTAACTGCGC 60

Query 61  GCGGAAAAACCTTACACACAGTGTCTTTTTGATACAGAACTCTTGCTTTGGTTTGGCCTA 120
          |||
Sbjct 61  GCGGAAAAACCTTACACACAGTGTCTTTTTGATACAGAACTCTTGCTTTGGTTTGGCCTA 120

Query 121 GAGATAGGTTGGGCCAGAGGTTTAACAAAACACAATTTAATTATTTTACAGTTAGTCAA 180
          |||
Sbjct 121 GAGATAGGTTGGGCCAGAGGTTTAACAAAACACAATTTAATTATTTTACAGTTAGTCAA 180

```

```

Query 181 ATTTTGAATTAATCTTCAAAACTTTCAACAACGGATCTCTTGGTTCTCGCATCGATGAAG 240
          |||
Sbjct 181 ATTTTGAATTAATCTTCAAAACTTTCAACAACGGATCTCTTGGTTCTCGCATCGATGAAG 240

Query 241 AACGCAGCGAAATGCGATAAGTAATATGAATTGCAGATTTTCGTGAATCATCGAATCTTT 300
          |||
Sbjct 241 AACGCAGCGAAATGCGATAAGTAATATGAATTGCAGATTTTCGTGAATCATCGAATCTTT 300

Query 301 GAACGCACATTGCGCCCTCTGGTATTCCAGAGGGCATGCCTGTTTGAGCGTCATTTCTCT 360
          |||
Sbjct 301 GAACGCACATTGCGCCCTCTGGTATTCCAGAGGGCATGCCTGTTTGAGCGTCATTTCTCT 360

Query 361 CTCAAACCCCCGGGTTTGGTATTGAGTGATACTCTTAGTCGGACTAGGCGTTTGCTTGAA 420
          |||
Sbjct 361 CTCAAACCCCCGGGTTTGGTATTGAGTGATACTCTTAGTCGGACTAGGCGTTTGCTTGAA 420

Query 421 AAGTATTGGCATGGGTAGTACTAGATAGTGCTGTGCGACCTCTCAATGTATTAGGTTTATC 480
          |||
Sbjct 421 AAGTATTGGCATGGGTAGTACTAGATAGTGCTGTGCGACCTCTCAATGTATTAGGTTTATC 480

Query 481 CAACTCGTTGAATGGTGTGGCGGGATATTTCTGGTATTGTTGGCCCGGCCTTACAACAAC 540
          |||
Sbjct 481 CAACTCGTTGAATGGTGTGGCGGGATATTTCTGGTATTGTTGGCCCGGCCTTACAACAAC 540

Query 541 CAAACAAGTTTGACCTCAAATCAGGTAGGAATACCCGCTGAACTTAAGCATATCAATAAG 600
          |||
Sbjct 541 CAAACAAGTTTGACCTCAAATCAGGTAGGAATACCCGCTGAACTTAAGCATATCAATAAG 600

Query 601 CGGAGGA 607
          |||
Sbjct 601 CGGAGGA 607

```

>gb|EU568961.1| *Pichia guilliermondii* isolate CNRMA 200600561 18S ribosomal RNA gene, partial sequence; internal transcribed spacer 1, 5.8S ribosomal RNA gene, and internal transcribed spacer 2, complete sequence; and 28S ribosomal RNA gene, partial sequence  
Length=607

Score = 1122 bits (607), Expect = 0.0  
Identities = 607/607 (100%), Gaps = 0/607 (0%)  
Strand=Plus/Plus

```

Query 1 TCCGTAGGTGAACCTGCGGAAGGATCATTACAGTATTCTTTTGCCAGCGCTTAACTGCGC 60
          |||
Sbjct 1 TCCGTAGGTGAACCTGCGGAAGGATCATTACAGTATTCTTTTGCCAGCGCTTAACTGCGC 60

Query 61 GCGGAAAAACCTTACACACAGTGTCTTTTGTACAGAACTCTTGCTTTGGTTTGGCCTA 120
          |||
Sbjct 61 GCGGAAAAACCTTACACACAGTGTCTTTTGTACAGAACTCTTGCTTTGGTTTGGCCTA 120

Query 121 GAGATAGGTTGGGCCAGAGGTTTAACAAAACACAATTTAATTATTTTACAGTTAGTCAA 180
          |||
Sbjct 121 GAGATAGGTTGGGCCAGAGGTTTAACAAAACACAATTTAATTATTTTACAGTTAGTCAA 180

Query 181 ATTTTGAATTAATCTTCAAAACTTTCAACAACGGATCTCTTGGTTCTCGCATCGATGAAG 240
          |||
Sbjct 181 ATTTTGAATTAATCTTCAAAACTTTCAACAACGGATCTCTTGGTTCTCGCATCGATGAAG 240

Query 241 AACGCAGCGAAATGCGATAAGTAATATGAATTGCAGATTTTCGTGAATCATCGAATCTTT 300
          |||
Sbjct 241 AACGCAGCGAAATGCGATAAGTAATATGAATTGCAGATTTTCGTGAATCATCGAATCTTT 300

Query 301 GAACGCACATTGCGCCCTCTGGTATTCCAGAGGGCATGCCTGTTTGAGCGTCATTTCTCT 360

```

```

Sbjct 301  |||||
GAACGCACATTGCGCCCTCTGGTATTCCAGAGGGCATGCCTGTTTGAGCGTCATTTCTCT 360
Query 361  CTCAAACCCCCGGGTTTGGTATTGAGTGATACTCTTAGTCGGACTAGGCGTTTGCTTGAA 420
Sbjct 361  CTCAAACCCCCGGGTTTGGTATTGAGTGATACTCTTAGTCGGACTAGGCGTTTGCTTGAA 420
Query 421  AAGTATTGGCATGGGTAGTACTAGATAGTGCTGTGCGACCTCTCAATGTATTAGGTTTATC 480
Sbjct 421  AAGTATTGGCATGGGTAGTACTAGATAGTGCTGTGCGACCTCTCAATGTATTAGGTTTATC 480
Query 481  CAACTCGTTGAATGGTGTGGCGGGATATTTCTGGTATTGTTGGCCCGGCCTTACAACAAC 540
Sbjct 481  CAACTCGTTGAATGGTGTGGCGGGATATTTCTGGTATTGTTGGCCCGGCCTTACAACAAC 540
Query 541  CAAACAAGTTTGACCTCAAATCAGGTAGGAATACCCGCTGAACTTAAGCATATCAATAAG 600
Sbjct 541  CAAACAAGTTTGACCTCAAATCAGGTAGGAATACCCGCTGAACTTAAGCATATCAATAAG 600
Query 601  CGGAGGA 607
Sbjct 601  |||||
CGGAGGA 607

```

>gb|EU568959.1| *Pichia guilliermondii* isolate CNRMA 200600938 18S ribosomal RNA gene, partial sequence; internal transcribed spacer 1, 5.8S ribosomal RNA gene, and internal transcribed spacer 2, complete sequence; and 28S ribosomal RNA gene, partial sequence  
Length=607

Score = 1122 bits (607), Expect = 0.0  
Identities = 607/607 (100%), Gaps = 0/607 (0%)  
Strand=Plus/Plus

```

Query 1  TCCGTAGGTGAACCTGCGGAAGGATCATTACAGTATTCTTTTGCCAGCGCTTAACTGCGC 60
Sbjct 1  TCCGTAGGTGAACCTGCGGAAGGATCATTACAGTATTCTTTTGCCAGCGCTTAACTGCGC 60
Query 61  GGCGAAAAACCTTACACACAGTGTCTTTTTGATACAGAACTCTTGCTTTGGTTTGGCCTA 120
Sbjct 61  GGCGAAAAACCTTACACACAGTGTCTTTTTGATACAGAACTCTTGCTTTGGTTTGGCCTA 120
Query 121 GAGATAGGTTGGGCCAGAGGTTTAACAAAACACAATTTAATTATTTTACAGTTAGTCAA 180
Sbjct 121 GAGATAGGTTGGGCCAGAGGTTTAACAAAACACAATTTAATTATTTTACAGTTAGTCAA 180
Query 181 ATTTTGAATTAATCTTCAAACCTTTCAACAACGGATCTCTTGGTTCTCGCATCGATGAAG 240
Sbjct 181 ATTTTGAATTAATCTTCAAACCTTTCAACAACGGATCTCTTGGTTCTCGCATCGATGAAG 240
Query 241 AACGCAGCGAAATGCGATAAGTAATATGAATTGCAGATTTTCGTGAATCATCGAATCTTT 300
Sbjct 241 AACGCAGCGAAATGCGATAAGTAATATGAATTGCAGATTTTCGTGAATCATCGAATCTTT 300
Query 301 GAACGCACATTGCGCCCTCTGGTATTCCAGAGGGCATGCCTGTTTGAGCGTCATTTCTCT 360
Sbjct 301 GAACGCACATTGCGCCCTCTGGTATTCCAGAGGGCATGCCTGTTTGAGCGTCATTTCTCT 360
Query 361 CTCAAACCCCCGGGTTTGGTATTGAGTGATACTCTTAGTCGGACTAGGCGTTTGCTTGAA 420
Sbjct 361 CTCAAACCCCCGGGTTTGGTATTGAGTGATACTCTTAGTCGGACTAGGCGTTTGCTTGAA 420
Query 421 AAGTATTGGCATGGGTAGTACTAGATAGTGCTGTGCGACCTCTCAATGTATTAGGTTTATC 480
Sbjct 421 |||||

```

```

Sbjct 421 AAGTATTGGCATGGGTAGTACTAGATAGTGCTGTCGACCTCTCAATGTATTAGGTTTATC 480
Query 481 CAACTCGTTGAATGGTGTGGCGGGATATTTCTGGTATTGTTGGCCCGGCCTTACAACAAC 540
          |||||||||||||||||||||||||||||||||||||||||||||||||||||||||||
Sbjct 481 CAACTCGTTGAATGGTGTGGCGGGATATTTCTGGTATTGTTGGCCCGGCCTTACAACAAC 540
Query 541 CAAACAAGTTTGACCTCAAATCAGGTAGGAATACCCGCTGAACTTAAGCATATCAATAAG 600
          |||||||||||||||||||||||||||||||||||||||||||||||||||||||||||
Sbjct 541 CAAACAAGTTTGACCTCAAATCAGGTAGGAATACCCGCTGAACTTAAGCATATCAATAAG 600
Query 601 CGGAGGA 607
          |||||||
Sbjct 601 CGGAGGA 607

```

>gb|EU568957.1| *Pichia guilliermondii* isolate CNRMA 200601010 18S ribosomal RNA gene, partial sequence; internal transcribed spacer 1, 5.8S ribosomal RNA gene, and internal transcribed spacer 2, complete sequence; and 28S ribosomal RNA gene, partial sequence  
Length=607

Score = 1122 bits (607), Expect = 0.0  
Identities = 607/607 (100%), Gaps = 0/607 (0%)  
Strand=Plus/Plus

```

Query 1 TCCGTAGGTGAACCTGCGGAAGGATCATTACAGTATTCTTTTGCCAGCGCTTAACTGCGC 60
          |||||||||||||||||||||||||||||||||||||||||||||||||||||||||||
Sbjct 1 TCCGTAGGTGAACCTGCGGAAGGATCATTACAGTATTCTTTTGCCAGCGCTTAACTGCGC 60
Query 61 GGCGAAAAACCTTACACACAGTGTCTTTTTGATACAGAACTCTTGCTTTGGTTTGGCCTA 120
          |||||||||||||||||||||||||||||||||||||||||||||||||||||||||||
Sbjct 61 GGCGAAAAACCTTACACACAGTGTCTTTTTGATACAGAACTCTTGCTTTGGTTTGGCCTA 120
Query 121 GAGATAGGTTGGGCCAGAGGTTTAACAAAAACACAATTTAATTATTTTACAGTTAGTCAA 180
          |||||||||||||||||||||||||||||||||||||||||||||||||||||||||||
Sbjct 121 GAGATAGGTTGGGCCAGAGGTTTAACAAAAACACAATTTAATTATTTTACAGTTAGTCAA 180
Query 181 ATTTTGAATTAATCTTCAAACTTTCAACAACGGATCTCTTGGTTCTCGCATCGATGAAG 240
          |||||||||||||||||||||||||||||||||||||||||||||||||||||||||||
Sbjct 181 ATTTTGAATTAATCTTCAAACTTTCAACAACGGATCTCTTGGTTCTCGCATCGATGAAG 240
Query 241 AACGCAGCGAAATGCGATAAGTAATATGAATTGCAGATTTTCGTGAATCATCGAATCTTT 300
          |||||||||||||||||||||||||||||||||||||||||||||||||||||||||||
Sbjct 241 AACGCAGCGAAATGCGATAAGTAATATGAATTGCAGATTTTCGTGAATCATCGAATCTTT 300
Query 301 GAACGCACATTGCGCCCTCTGGTATTCCAGAGGGCATGCCTGTTTGAGCGTCATTTCTCT 360
          |||||||||||||||||||||||||||||||||||||||||||||||||||||||||||
Sbjct 301 GAACGCACATTGCGCCCTCTGGTATTCCAGAGGGCATGCCTGTTTGAGCGTCATTTCTCT 360
Query 361 CTCAAACCCCCGGGTTTGGTATTGAGTGATACTCTTAGTTCGGACTAGGCGTTTGCTTGAA 420
          |||||||||||||||||||||||||||||||||||||||||||||||||||||||||||
Sbjct 361 CTCAAACCCCCGGGTTTGGTATTGAGTGATACTCTTAGTTCGGACTAGGCGTTTGCTTGAA 420
Query 421 AAGTATTGGCATGGGTAGTACTAGATAGTGCTGTCGACCTCTCAATGTATTAGGTTTATC 480
          |||||||||||||||||||||||||||||||||||||||||||||||||||||||||||
Sbjct 421 AAGTATTGGCATGGGTAGTACTAGATAGTGCTGTCGACCTCTCAATGTATTAGGTTTATC 480
Query 481 CAACTCGTTGAATGGTGTGGCGGGATATTTCTGGTATTGTTGGCCCGGCCTTACAACAAC 540
          |||||||||||||||||||||||||||||||||||||||||||||||||||||||||||
Sbjct 481 CAACTCGTTGAATGGTGTGGCGGGATATTTCTGGTATTGTTGGCCCGGCCTTACAACAAC 540
Query 541 CAAACAAGTTTGACCTCAAATCAGGTAGGAATACCCGCTGAACTTAAGCATATCAATAAG 600
          |||||||||||||||||||||||||||||||||||||||||||||||||||||||||||
Sbjct 541 CAAACAAGTTTGACCTCAAATCAGGTAGGAATACCCGCTGAACTTAAGCATATCAATAAG 600

```



Query 601 CGGAGGA 607  
          |||||  
Sbjct 601 CGGAGGA 607

>gb|EU568955.1| Pichia guilliermondii isolate CNRMA 200601023 18S ribosomal RNA gene, partial sequence; internal transcribed spacer 1, 5.8S ribosomal RNA gene, and internal transcribed spacer 2, complete sequence; and 28S ribosomal RNA gene, partial sequence  
Length=607

Score = 1122 bits (607), Expect = 0.0  
Identities = 607/607 (100%), Gaps = 0/607 (0%)  
Strand=Plus/Plus

Query 1 TCCGTAGGTGAACCTGCGGAAGGATCATTACAGTATTCTTTTGCCAGCGCTTAACTGCGC 60  
          |||||  
Sbjct 1 TCCGTAGGTGAACCTGCGGAAGGATCATTACAGTATTCTTTTGCCAGCGCTTAACTGCGC 60

Query 61 GGCGAAAAACCTTACACACAGTGTCTTTTGATACAGAACTCTTGCTTTGGTTTGGCCTA 120  
          |||||  
Sbjct 61 GGCGAAAAACCTTACACACAGTGTCTTTTGATACAGAACTCTTGCTTTGGTTTGGCCTA 120

Query 121 GAGATAGGTTGGGCCAGAGGTTTAAACAAAACACAATTTAATTATTTTACAGTTAGTCAA 180  
          |||||  
Sbjct 121 GAGATAGGTTGGGCCAGAGGTTTAAACAAAACACAATTTAATTATTTTACAGTTAGTCAA 180

Query 181 ATTTTGAATTAATCTTCAAACTTTCAACAACGGATCTCTTGGTTCTCGCATCGATGAAG 240  
          |||||  
Sbjct 181 ATTTTGAATTAATCTTCAAACTTTCAACAACGGATCTCTTGGTTCTCGCATCGATGAAG 240

Query 241 AACGCAGCGAAATGCGATAAGTAATATGAATTGCAGATTTTCGTGAATCATCGAATCTTT 300  
          |||||  
Sbjct 241 AACGCAGCGAAATGCGATAAGTAATATGAATTGCAGATTTTCGTGAATCATCGAATCTTT 300

Query 301 GAACGCACATTGCGCCCTCTGGTATTCCAGAGGGCATGCCTGTTTGAGCGTCATTTCTCT 360  
          |||||  
Sbjct 301 GAACGCACATTGCGCCCTCTGGTATTCCAGAGGGCATGCCTGTTTGAGCGTCATTTCTCT 360

Query 361 CTCAAACCCCCGGGTTTGGTATTGAGTGATACTCTTAGTTCGGACTAGGCGTTTGCTTGAA 420  
          |||||  
Sbjct 361 CTCAAACCCCCGGGTTTGGTATTGAGTGATACTCTTAGTTCGGACTAGGCGTTTGCTTGAA 420

Query 421 AAGTATTGGCATGGGTAGTACTAGATAGTGCTGTGACCTCTCAATGTATTAGGTTTATC 480  
          |||||  
Sbjct 421 AAGTATTGGCATGGGTAGTACTAGATAGTGCTGTGACCTCTCAATGTATTAGGTTTATC 480

Query 481 CAACTCGTTGAATGGTGTGGCGGGATATTTCTGGTATTGTTGGCCCGGCCTTACAACAAC 540  
          |||||  
Sbjct 481 CAACTCGTTGAATGGTGTGGCGGGATATTTCTGGTATTGTTGGCCCGGCCTTACAACAAC 540

Query 541 CAAACAAGTTTGACCTCAAATCAGGTAGGAATACCCGCTGAACTTAAGCATATCAATAAG 600  
          |||||  
Sbjct 541 CAAACAAGTTTGACCTCAAATCAGGTAGGAATACCCGCTGAACTTAAGCATATCAATAAG 600

Query 601 CGGAGGA 607  
          |||||  
Sbjct 601 CGGAGGA 607

>gb|EU568953.1| Pichia guilliermondii isolate CNRMA 200700041 18S ribosomal RNA gene, partial sequence; internal transcribed spacer 1, 5.8S ribosomal RNA gene, and internal transcribed spacer 2, complete

sequence; and 28S ribosomal RNA gene, partial sequence  
Length=607

Score = 1122 bits (607), Expect = 0.0  
Identities = 607/607 (100%), Gaps = 0/607 (0%)  
Strand=Plus/Plus

```
Query 1 TCCGTAGGTGAACCTGCGGAAGGATCATTACAGTATTCTTTTGCCAGCGCTTAACTGCGC 60
      |||
Sbjct 1 TCCGTAGGTGAACCTGCGGAAGGATCATTACAGTATTCTTTTGCCAGCGCTTAACTGCGC 60

Query 61 GGCGAAAAACCTTACACACAGTGTCTTTTGATAACAGAACTCTTGCTTTGGTTTGGCCTA 120
      |||
Sbjct 61 GGCGAAAAACCTTACACACAGTGTCTTTTGATAACAGAACTCTTGCTTTGGTTTGGCCTA 120

Query 121 GAGATAGGTTGGGCCAGAGGTTTAAACAAAACACAATTTAATTATTTTACAGTTAGTCAA 180
      |||
Sbjct 121 GAGATAGGTTGGGCCAGAGGTTTAAACAAAACACAATTTAATTATTTTACAGTTAGTCAA 180

Query 181 ATTTTGAATTAATCTTCAAACCTTTCAACAACGGATCTCTTGGTTCTCGCATCGATGAAG 240
      |||
Sbjct 181 ATTTTGAATTAATCTTCAAACCTTTCAACAACGGATCTCTTGGTTCTCGCATCGATGAAG 240

Query 241 AACGCAGCGAAATGCGATAAGTAATATGAATTGCAGATTTTCGTGAATCATCGAATCTTT 300
      |||
Sbjct 241 AACGCAGCGAAATGCGATAAGTAATATGAATTGCAGATTTTCGTGAATCATCGAATCTTT 300

Query 301 GAACGCACATTGCGCCCTCTGGTATTCCAGAGGGCATGCCTGTTTGAGCGTCATTTCTCT 360
      |||
Sbjct 301 GAACGCACATTGCGCCCTCTGGTATTCCAGAGGGCATGCCTGTTTGAGCGTCATTTCTCT 360

Query 361 CTCAAACCCCCGGGTTTGGTATTGAGTGATACTCTTAGTCGGACTAGGCGTTTGCTTGAA 420
      |||
Sbjct 361 CTCAAACCCCCGGGTTTGGTATTGAGTGATACTCTTAGTCGGACTAGGCGTTTGCTTGAA 420

Query 421 AAGTATTGGCATGGGTAGTACTAGATAGTGCTGTGCGACCTCTCAATGTATTAGGTTTATC 480
      |||
Sbjct 421 AAGTATTGGCATGGGTAGTACTAGATAGTGCTGTGCGACCTCTCAATGTATTAGGTTTATC 480

Query 481 CAACTCGTTGAATGGTGTGGCGGGATATTTCTGGTATTGTTGGCCCGGCCTTACAACAAC 540
      |||
Sbjct 481 CAACTCGTTGAATGGTGTGGCGGGATATTTCTGGTATTGTTGGCCCGGCCTTACAACAAC 540

Query 541 CAAACAAGTTTGACCTCAAATCAGGTAGGAATACCCGCTGAACTTAAGCATATCAATAAG 600
      |||
Sbjct 541 CAAACAAGTTTGACCTCAAATCAGGTAGGAATACCCGCTGAACTTAAGCATATCAATAAG 600

Query 601 CGGAGGA 607
      |||
Sbjct 601 CGGAGGA 607
```

>gb|EU568951.1| Pichia guilliermondii isolate CNRMA 200700261 18S ribosomal RNA  
gene, partial sequence; internal transcribed spacer 1, 5.8S  
ribosomal RNA gene, and internal transcribed spacer 2, complete  
sequence; and 28S ribosomal RNA gene, partial sequence  
Length=607

Score = 1122 bits (607), Expect = 0.0  
Identities = 607/607 (100%), Gaps = 0/607 (0%)  
Strand=Plus/Plus

```
Query 1 TCCGTAGGTGAACCTGCGGAAGGATCATTACAGTATTCTTTTGCCAGCGCTTAACTGCGC 60
      |||
```



```

Query 181 ATTTTGAATTAATCTTCAAACTTTCAACAACGGATCTCTTGGTTCTCGCATCGATGAAG 240
          |||
Sbjct 181 ATTTTGAATTAATCTTCAAACTTTCAACAACGGATCTCTTGGTTCTCGCATCGATGAAG 240

Query 241 AACGCAGCGAAATGCGATAAGTAATATGAATTGCAGATTTTCGTGAATCATCGAATCTTT 300
          |||
Sbjct 241 AACGCAGCGAAATGCGATAAGTAATATGAATTGCAGATTTTCGTGAATCATCGAATCTTT 300

Query 301 GAACGCACATTGCGCCCTCTGGTATTCCAGAGGGCATGCCTGTTTGAGCGTCATTTCTCT 360
          |||
Sbjct 301 GAACGCACATTGCGCCCTCTGGTATTCCAGAGGGCATGCCTGTTTGAGCGTCATTTCTCT 360

Query 361 CTCAAACCCCCGGGTTTGGTATTGAGTGATACTCTTAGTCGGACTAGGCGTTTGCTTGAA 420
          |||
Sbjct 361 CTCAAACCCCCGGGTTTGGTATTGAGTGATACTCTTAGTCGGACTAGGCGTTTGCTTGAA 420

Query 421 AAGTATTGGCATGGGTAGTACTAGATAGTGCTGTCGACCTCTCAATGTATTAGGTTTATC 480
          |||
Sbjct 421 AAGTATTGGCATGGGTAGTACTAGATAGTGCTGTCGACCTCTCAATGTATTAGGTTTATC 480

Query 481 CAACTCGTTGAATGGTGTGGCGGGATATTTCTGGTATTGTTGGCCCGGCCTTACAACAAC 540
          |||
Sbjct 481 CAACTCGTTGAATGGTGTGGCGGGATATTTCTGGTATTGTTGGCCCGGCCTTACAACAAC 540

Query 541 CAAACAAGTTTGACCTCAAATCAGGTAGGAATACCCGCTGAACTTAAGCATATCAATAAG 600
          |||
Sbjct 541 CAAACAAGTTTGACCTCAAATCAGGTAGGAATACCCGCTGAACTTAAGCATATCAATAAG 600

Query 601 CGGAGGA 607
          |||
Sbjct 601 CGGAGGA 607

```

>gb|EU568947.1| *Pichia guilliermondii* isolate CNRMA 200500030 18S ribosomal RNA gene, partial sequence; internal transcribed spacer 1, 5.8S ribosomal RNA gene, and internal transcribed spacer 2, complete sequence; and 28S ribosomal RNA gene, partial sequence  
Length=607

Score = 1122 bits (607), Expect = 0.0  
Identities = 607/607 (100%), Gaps = 0/607 (0%)  
Strand=Plus/Plus

```

Query 1 TCCGTAGGTGAACCTGCGGAAGGATCATTACAGTATTCTTTTGCCAGCGCTTAACTGCGC 60
          |||
Sbjct 1 TCCGTAGGTGAACCTGCGGAAGGATCATTACAGTATTCTTTTGCCAGCGCTTAACTGCGC 60

Query 61 GGCGAAAAACCTTACACACAGTGTCTTTTGGTATTGTTGGCCCGGCCTTACAACAAC 120
          |||
Sbjct 61 GGCGAAAAACCTTACACACAGTGTCTTTTGGTATTGTTGGCCCGGCCTTACAACAAC 120

Query 121 GAGATAGGTTGGGCCAGAGGTTTAACAAAACACAATTTAATTATTTTACAGTTAGTCAA 180
          |||
Sbjct 121 GAGATAGGTTGGGCCAGAGGTTTAACAAAACACAATTTAATTATTTTACAGTTAGTCAA 180

Query 181 ATTTTGAATTAATCTTCAAACTTTCAACAACGGATCTCTTGGTTCTCGCATCGATGAAG 240
          |||
Sbjct 181 ATTTTGAATTAATCTTCAAACTTTCAACAACGGATCTCTTGGTTCTCGCATCGATGAAG 240

Query 241 AACGCAGCGAAATGCGATAAGTAATATGAATTGCAGATTTTCGTGAATCATCGAATCTTT 300
          |||
Sbjct 241 AACGCAGCGAAATGCGATAAGTAATATGAATTGCAGATTTTCGTGAATCATCGAATCTTT 300

```

```

Query 301 GAACGCACATTGCGCCCTCTGGTATTCCAGAGGGCATGCCTGTTTGAGCGTCATTTCTCT 360
          |||
Sbjct 301 GAACGCACATTGCGCCCTCTGGTATTCCAGAGGGCATGCCTGTTTGAGCGTCATTTCTCT 360

Query 361 CTCAAACCCCCGGGTTTGGTATTGAGTGATACTCTTAGTCGGACTAGGCGTTTGCTTGAA 420
          |||
Sbjct 361 CTCAAACCCCCGGGTTTGGTATTGAGTGATACTCTTAGTCGGACTAGGCGTTTGCTTGAA 420

Query 421 AAGTATTGGCATGGGTAGTACTAGATAGTGCTGTTCGACCTCTCAATGTATTAGGTTTATC 480
          |||
Sbjct 421 AAGTATTGGCATGGGTAGTACTAGATAGTGCTGTTCGACCTCTCAATGTATTAGGTTTATC 480

Query 481 CAACTCGTTGAATGGTGTGGCGGGATATTTCTGGTATTGTTGGCCCGCCTTACAACAAC 540
          |||
Sbjct 481 CAACTCGTTGAATGGTGTGGCGGGATATTTCTGGTATTGTTGGCCCGCCTTACAACAAC 540

Query 541 CAAACAAGTTTGACCTCAAATCAGGTAGGAATACCCGCTGAACTTAAGCATATCAATAAG 600
          |||
Sbjct 541 CAAACAAGTTTGACCTCAAATCAGGTAGGAATACCCGCTGAACTTAAGCATATCAATAAG 600

Query 601 CGGAGGA 607
          |||
Sbjct 601 CGGAGGA 607

```

>gb|EU568945.1| *Pichia guilliermondii* isolate CNRMA 200500086 18S ribosomal RNA gene, partial sequence; internal transcribed spacer 1, 5.8S ribosomal RNA gene, and internal transcribed spacer 2, complete sequence; and 28S ribosomal RNA gene, partial sequence  
Length=607

Score = 1122 bits (607), Expect = 0.0  
Identities = 607/607 (100%), Gaps = 0/607 (0%)  
Strand=Plus/Plus

```

Query 1 TCCGTAGGTGAACCTGCGGAAGGATCATTACAGTATTCTTTTGCCAGCGCTTAACTGCGC 60
          |||
Sbjct 1 TCCGTAGGTGAACCTGCGGAAGGATCATTACAGTATTCTTTTGCCAGCGCTTAACTGCGC 60

Query 61 GGCGAAAAACCTTACACACAGTGTCTTTTTGATACAGAACTCTTGCTTTGGTTTGGCCTA 120
          |||
Sbjct 61 GGCGAAAAACCTTACACACAGTGTCTTTTTGATACAGAACTCTTGCTTTGGTTTGGCCTA 120

Query 121 GAGATAGGTTGGGCCAGAGGTTTAACAAAACACAATTTAATTATTTTACAGTTAGTCAA 180
          |||
Sbjct 121 GAGATAGGTTGGGCCAGAGGTTTAACAAAACACAATTTAATTATTTTACAGTTAGTCAA 180

Query 181 ATTTTGAATTAATCTTCAAACCTTTCAACAACGGATCTCTTGGTTCTCGCATCGATGAAG 240
          |||
Sbjct 181 ATTTTGAATTAATCTTCAAACCTTTCAACAACGGATCTCTTGGTTCTCGCATCGATGAAG 240

Query 241 AACGCAGCGAAATGCGATAAGTAATATGAATTGCAGATTTTCGTGAATCATCGAATCTTT 300
          |||
Sbjct 241 AACGCAGCGAAATGCGATAAGTAATATGAATTGCAGATTTTCGTGAATCATCGAATCTTT 300

Query 301 GAACGCACATTGCGCCCTCTGGTATTCCAGAGGGCATGCCTGTTTGAGCGTCATTTCTCT 360
          |||
Sbjct 301 GAACGCACATTGCGCCCTCTGGTATTCCAGAGGGCATGCCTGTTTGAGCGTCATTTCTCT 360

Query 361 CTCAAACCCCCGGGTTTGGTATTGAGTGATACTCTTAGTCGGACTAGGCGTTTGCTTGAA 420
          |||
Sbjct 361 CTCAAACCCCCGGGTTTGGTATTGAGTGATACTCTTAGTCGGACTAGGCGTTTGCTTGAA 420

Query 421 AAGTATTGGCATGGGTAGTACTAGATAGTGCTGTTCGACCTCTCAATGTATTAGGTTTATC 480

```

```

Sbjct 421 |||||
AAGTATTGGCATGGGTAGTACTAGATAGTGCTGTCGACCTCTCAATGTATTAGGTTTATC 480

Query 481 CAACTCGTTGAATGGTGTGGCGGGATATTTCTGGTATTGTTGGCCCGGCCTTACAACAAC 540
|||||
Sbjct 481 CAACTCGTTGAATGGTGTGGCGGGATATTTCTGGTATTGTTGGCCCGGCCTTACAACAAC 540

Query 541 CAAACAAGTTTGACCTCAAATCAGGTAGGAATACCCGCTGAACTTAAGCATATCAATAAG 600
|||||
Sbjct 541 CAAACAAGTTTGACCTCAAATCAGGTAGGAATACCCGCTGAACTTAAGCATATCAATAAG 600

Query 601 CGGAGGA 607
|||||
Sbjct 601 CGGAGGA 607

```

>gb|EU568943.1| Pichia guilliermondii isolate CNRMA 200500816 18S ribosomal RNA gene, partial sequence; internal transcribed spacer 1, 5.8S ribosomal RNA gene, and internal transcribed spacer 2, complete sequence; and 28S ribosomal RNA gene, partial sequence  
Length=607

Score = 1122 bits (607), Expect = 0.0  
Identities = 607/607 (100%), Gaps = 0/607 (0%)  
Strand=Plus/Plus

```

Query 1 TCCGTAGGTGAACCTGCGGAAGGATCATTACAGTATTCTTTTGCCAGCGCTTAACTGCGC 60
|||||
Sbjct 1 TCCGTAGGTGAACCTGCGGAAGGATCATTACAGTATTCTTTTGCCAGCGCTTAACTGCGC 60

Query 61 GGCGAAAAACCTTACACACAGTGTCTTTTTGATACAGAACTCTTGCTTTGGTTTGGCCTA 120
|||||
Sbjct 61 GGCGAAAAACCTTACACACAGTGTCTTTTTGATACAGAACTCTTGCTTTGGTTTGGCCTA 120

Query 121 GAGATAGGTTGGGCCAGAGGTTTAACAAAAACAAATTTAATTATTTTACAGTTAGTCAA 180
|||||
Sbjct 121 GAGATAGGTTGGGCCAGAGGTTTAACAAAAACAAATTTAATTATTTTACAGTTAGTCAA 180

Query 181 ATTTTGAATTAATCTTCAAACCTTTCAACAACGGATCTCTTGGTTCTCGCATCGATGAAG 240
|||||
Sbjct 181 ATTTTGAATTAATCTTCAAACCTTTCAACAACGGATCTCTTGGTTCTCGCATCGATGAAG 240

Query 241 AACGCAGCGAAATGCGATAAGTAATATGAATTGCAGATTTTCGTGAATCATCGAATCTTT 300
|||||
Sbjct 241 AACGCAGCGAAATGCGATAAGTAATATGAATTGCAGATTTTCGTGAATCATCGAATCTTT 300

Query 301 GAACGCACATTGCGCCCTCTGGTATTCCAGAGGGCATGCCTGTTTGAGCGTCATTTCTCT 360
|||||
Sbjct 301 GAACGCACATTGCGCCCTCTGGTATTCCAGAGGGCATGCCTGTTTGAGCGTCATTTCTCT 360

Query 361 CTCAAACCCCCGGGTTTGGTATTGAGTGATACTCTTAGTCGGACTAGGCGTTTGCTTGAA 420
|||||
Sbjct 361 CTCAAACCCCCGGGTTTGGTATTGAGTGATACTCTTAGTCGGACTAGGCGTTTGCTTGAA 420

Query 421 AAGTATTGGCATGGGTAGTACTAGATAGTGCTGTCGACCTCTCAATGTATTAGGTTTATC 480
|||||
Sbjct 421 AAGTATTGGCATGGGTAGTACTAGATAGTGCTGTCGACCTCTCAATGTATTAGGTTTATC 480

Query 481 CAACTCGTTGAATGGTGTGGCGGGATATTTCTGGTATTGTTGGCCCGGCCTTACAACAAC 540
|||||
Sbjct 481 CAACTCGTTGAATGGTGTGGCGGGATATTTCTGGTATTGTTGGCCCGGCCTTACAACAAC 540

Query 541 CAAACAAGTTTGACCTCAAATCAGGTAGGAATACCCGCTGAACTTAAGCATATCAATAAG 600
|||||

```

Sbjct 541 CAAACAAGTTTGACCTCAAATCAGGTAGGAATACCCGCTGAACTTAAGCATATCAATAAG 600  
Query 601 CGGAGGA 607  
|||  
Sbjct 601 CGGAGGA 607

>gb|EU568941.1| Pichia guilliermondii isolate CNRMA 200500861 18S ribosomal RNA gene, partial sequence; internal transcribed spacer 1, 5.8S ribosomal RNA gene, and internal transcribed spacer 2, complete sequence; and 28S ribosomal RNA gene, partial sequence  
Length=607

Score = 1122 bits (607), Expect = 0.0  
Identities = 607/607 (100%), Gaps = 0/607 (0%)  
Strand=Plus/Plus

Query 1 TCCGTAGGTGAACCTGCGGAAGGATCATTACAGTATTCTTTTGCCAGCGCTTAACTGCGC 60  
|  
Sbjct 1 TCCGTAGGTGAACCTGCGGAAGGATCATTACAGTATTCTTTTGCCAGCGCTTAACTGCGC 60  
  
Query 61 GGCGAAAAACCTTACACACAGTGTCTTTTGATACAGAACTCTTGCTTTGGTTTGGCCTA 120  
|  
Sbjct 61 GGCGAAAAACCTTACACACAGTGTCTTTTGATACAGAACTCTTGCTTTGGTTTGGCCTA 120  
  
Query 121 GAGATAGGTTGGGCCAGAGGTTTAAACAAAACACAATTTAATTATTTTACAGTTAGTCAA 180  
|  
Sbjct 121 GAGATAGGTTGGGCCAGAGGTTTAAACAAAACACAATTTAATTATTTTACAGTTAGTCAA 180  
  
Query 181 ATTTTGAATTAATCTTCAAACTTTCAACAACGGATCTCTTGGTTCTCGCATCGATGAAG 240  
|  
Sbjct 181 ATTTTGAATTAATCTTCAAACTTTCAACAACGGATCTCTTGGTTCTCGCATCGATGAAG 240  
  
Query 241 AACGCAGCGAAATGCGATAAGTAATATGAATTGCAGATTTTCGTGAATCATCGAATCTTT 300  
|  
Sbjct 241 AACGCAGCGAAATGCGATAAGTAATATGAATTGCAGATTTTCGTGAATCATCGAATCTTT 300  
  
Query 301 GAACGCACATTGCGCCCTCTGGTATTCCAGAGGGCATGCCTGTTTGAGCGTCATTTCTCT 360  
|  
Sbjct 301 GAACGCACATTGCGCCCTCTGGTATTCCAGAGGGCATGCCTGTTTGAGCGTCATTTCTCT 360  
  
Query 361 CTCAAACCCCCGGGTTTGGTATTGAGTGATACTCTTAGTCGGACTAGGCGTTTGCTTGAA 420  
|  
Sbjct 361 CTCAAACCCCCGGGTTTGGTATTGAGTGATACTCTTAGTCGGACTAGGCGTTTGCTTGAA 420  
  
Query 421 AAGTATTGGCATGGGTAGTACTAGATAGTGCTGTGACCTCTCAATGTATTAGGTTTATC 480  
|  
Sbjct 421 AAGTATTGGCATGGGTAGTACTAGATAGTGCTGTGACCTCTCAATGTATTAGGTTTATC 480  
  
Query 481 CAACTCGTTGAATGGTGTGGCGGGATATTTCTGGTATTGTTGGCCCGGCCTTACAACAAC 540  
|  
Sbjct 481 CAACTCGTTGAATGGTGTGGCGGGATATTTCTGGTATTGTTGGCCCGGCCTTACAACAAC 540  
  
Query 541 CAAACAAGTTTGACCTCAAATCAGGTAGGAATACCCGCTGAACTTAAGCATATCAATAAG 600  
|  
Sbjct 541 CAAACAAGTTTGACCTCAAATCAGGTAGGAATACCCGCTGAACTTAAGCATATCAATAAG 600  
  
Query 601 CGGAGGA 607  
|||  
Sbjct 601 CGGAGGA 607

>gb|EU568939.1| Pichia guilliermondii isolate CNRMA 200501141 18S ribosomal RNA gene, partial sequence; internal transcribed spacer 1, 5.8S

ribosomal RNA gene, and internal transcribed spacer 2, complete sequence; and 28S ribosomal RNA gene, partial sequence  
Length=607

Score = 1122 bits (607), Expect = 0.0  
Identities = 607/607 (100%), Gaps = 0/607 (0%)  
Strand=Plus/Plus

```
Query 1 TCCGTAGGTGAACCTGCGGAAGGATCATTACAGTATTCTTTTGCCAGCGCTTAACTGCGC 60
      |||
Sbjct 1 TCCGTAGGTGAACCTGCGGAAGGATCATTACAGTATTCTTTTGCCAGCGCTTAACTGCGC 60

Query 61 GGCGAAAAACCTTACACACAGTGTCTTTTGATAACAGAACTCTTGCTTTGGTTTGGCCTA 120
      |||
Sbjct 61 GGCGAAAAACCTTACACACAGTGTCTTTTGATAACAGAACTCTTGCTTTGGTTTGGCCTA 120

Query 121 GAGATAGGTTGGGCCAGAGGTTTAAACAAAACACAATTTAATTATTTTACAGTTAGTCAA 180
      |||
Sbjct 121 GAGATAGGTTGGGCCAGAGGTTTAAACAAAACACAATTTAATTATTTTACAGTTAGTCAA 180

Query 181 ATTTTGAATTAATCTTCAAACCTTTCAACAACGGATCTCTTGGTTCTCGCATCGATGAAG 240
      |||
Sbjct 181 ATTTTGAATTAATCTTCAAACCTTTCAACAACGGATCTCTTGGTTCTCGCATCGATGAAG 240

Query 241 AACGCAGCGAAATGCGATAAGTAATATGAATTGCAGATTTTCGTGAATCATCGAATCTTT 300
      |||
Sbjct 241 AACGCAGCGAAATGCGATAAGTAATATGAATTGCAGATTTTCGTGAATCATCGAATCTTT 300

Query 301 GAACGCACATTGCGCCCTCTGGTATTCCAGAGGGCATGCCTGTTTGAGCGTCATTTCTCT 360
      |||
Sbjct 301 GAACGCACATTGCGCCCTCTGGTATTCCAGAGGGCATGCCTGTTTGAGCGTCATTTCTCT 360

Query 361 CTCAAACCCCCGGGTTTGGTATTGAGTGATACTCTTAGTCCGACTAGGCGTTTGCTTGAA 420
      |||
Sbjct 361 CTCAAACCCCCGGGTTTGGTATTGAGTGATACTCTTAGTCCGACTAGGCGTTTGCTTGAA 420

Query 421 AAGTATTGGCATGGGTAGTACTAGATAGTGCTGTGCGACCTCTCAATGTATTAGGTTTATC 480
      |||
Sbjct 421 AAGTATTGGCATGGGTAGTACTAGATAGTGCTGTGCGACCTCTCAATGTATTAGGTTTATC 480

Query 481 CAACTCGTTGAATGGTGTGGCGGGATATTTCTGGTATTGTTGGCCCGGCCTTACAACAAC 540
      |||
Sbjct 481 CAACTCGTTGAATGGTGTGGCGGGATATTTCTGGTATTGTTGGCCCGGCCTTACAACAAC 540

Query 541 CAAACAAGTTTGACCTCAAATCAGGTAGGAATACCCGCTGAACTTAAGCATATCAATAAG 600
      |||
Sbjct 541 CAAACAAGTTTGACCTCAAATCAGGTAGGAATACCCGCTGAACTTAAGCATATCAATAAG 600

Query 601 CGGAGGA 607
      |||
Sbjct 601 CGGAGGA 607
```

>gb|EU568937.1| Pichia guilliermondii isolate CNRMA 200501142 18S ribosomal RNA gene, partial sequence; internal transcribed spacer 1, 5.8S ribosomal RNA gene, and internal transcribed spacer 2, complete sequence; and 28S ribosomal RNA gene, partial sequence  
Length=607

Score = 1122 bits (607), Expect = 0.0  
Identities = 607/607 (100%), Gaps = 0/607 (0%)  
Strand=Plus/Plus

```
Query 1 TCCGTAGGTGAACCTGCGGAAGGATCATTACAGTATTCTTTTGCCAGCGCTTAACTGCGC 60
```



```

Sbjct 1      |||
TCCGTAGGTGAACCTGCGGAAGGATCATTACAGTATTCTTTTGCCAGCGCTTAACTGCGC 60

Query 61      GGCGAAAAACCTTACACACAGTGTCTTTTGATACAGAACTCTTGCTTTGGTTTGGCCTA 120
|||
Sbjct 61      GGCGAAAAACCTTACACACAGTGTCTTTTGATACAGAACTCTTGCTTTGGTTTGGCCTA 120

Query 121     GAGATAGGTTGGGCCAGAGGTTTAAACAAAACACAATTTAATTATTTTACAGTTAGTCAA 180
|||
Sbjct 121     GAGATAGGTTGGGCCAGAGGTTTAAACAAAACACAATTTAATTATTTTACAGTTAGTCAA 180

Query 181     ATTTTGAATTAATCTTCAAACCTTTCAACAACGGATCTCTTGGTTCTCGCATCGATGAAG 240
|||
Sbjct 181     ATTTTGAATTAATCTTCAAACCTTTCAACAACGGATCTCTTGGTTCTCGCATCGATGAAG 240

Query 241     AACGCAGCGAAATGCGATAAGTAATATGAATTGCAGATTTTCGTGAATCATCGAATCTTT 300
|||
Sbjct 241     AACGCAGCGAAATGCGATAAGTAATATGAATTGCAGATTTTCGTGAATCATCGAATCTTT 300

Query 301     GAACGCACATTGCGCCCTCTGGTATTCCAGAGGGCATGCCTGTTTGAGCGTCATTTCTCT 360
|||
Sbjct 301     GAACGCACATTGCGCCCTCTGGTATTCCAGAGGGCATGCCTGTTTGAGCGTCATTTCTCT 360

Query 361     CTCAAACCCCCGGGTTTGGTATTGAGTGATACTCTTAGTCGGACTAGGCGTTTGCTTGAA 420
|||
Sbjct 361     CTCAAACCCCCGGGTTTGGTATTGAGTGATACTCTTAGTCGGACTAGGCGTTTGCTTGAA 420

Query 421     AAGTATTGGCATGGGTAGTACTAGATAGTGCTGTTCGACCTCTCAATGTATTAGGTTTATC 480
|||
Sbjct 421     AAGTATTGGCATGGGTAGTACTAGATAGTGCTGTTCGACCTCTCAATGTATTAGGTTTATC 480

Query 481     CAACTCGTTGAATGGTGTGGCGGGATATTTCTGGTATTGTTGGCCCGGCCTTACAACAAC 540
|||
Sbjct 481     CAACTCGTTGAATGGTGTGGCGGGATATTTCTGGTATTGTTGGCCCGGCCTTACAACAAC 540

Query 541     CAAACAAGTTTGACCTCAAATCAGGTAGGAATACCCGCTGAACTTAAGCATATCAATAAG 600
|||
Sbjct 541     CAAACAAGTTTGACCTCAAATCAGGTAGGAATACCCGCTGAACTTAAGCATATCAATAAG 600

Query 601     CGGAGGA 607
|||
Sbjct 601     CGGAGGA 607

```

>gb|EU568935.1| Pichia guilliermondii isolate CNRMA 200501144 18S ribosomal RNA gene, partial sequence; internal transcribed spacer 1, 5.8S ribosomal RNA gene, and internal transcribed spacer 2, complete sequence; and 28S ribosomal RNA gene, partial sequence  
Length=607

Score = 1122 bits (607), Expect = 0.0  
Identities = 607/607 (100%), Gaps = 0/607 (0%)  
Strand=Plus/Plus

```

Query 1      TCCGTAGGTGAACCTGCGGAAGGATCATTACAGTATTCTTTTGCCAGCGCTTAACTGCGC 60
|||
Sbjct 1      TCCGTAGGTGAACCTGCGGAAGGATCATTACAGTATTCTTTTGCCAGCGCTTAACTGCGC 60

Query 61      GGCGAAAAACCTTACACACAGTGTCTTTTGATACAGAACTCTTGCTTTGGTTTGGCCTA 120
|||
Sbjct 61      GGCGAAAAACCTTACACACAGTGTCTTTTGATACAGAACTCTTGCTTTGGTTTGGCCTA 120

Query 121     GAGATAGGTTGGGCCAGAGGTTTAAACAAAACACAATTTAATTATTTTACAGTTAGTCAA 180
|||

```

```

Sbjct 121 GAGATAGGTTGGGCCAGAGGTTTAACAAAACACAATTTAATTATTTTTACAGTTAGTCAA 180
Query 181 ATTTTGAATTAATCTTCAAACCTTTCAACAACGGATCTCTTGGTTCTCGCATCGATGAAG 240
      |||||||||||||||||||||||||||||||||||||||||||||||||||||||||||
Sbjct 181 ATTTTGAATTAATCTTCAAACCTTTCAACAACGGATCTCTTGGTTCTCGCATCGATGAAG 240
Query 241 AACGCAGCGAAATGCGATAAGTAATATGAATTGCAGATTTTCGTGAATCATCGAATCTTT 300
      |||||||||||||||||||||||||||||||||||||||||||||||||||||||||||
Sbjct 241 AACGCAGCGAAATGCGATAAGTAATATGAATTGCAGATTTTCGTGAATCATCGAATCTTT 300
Query 301 GAACGCACATTGCGCCCTCTGGTATTCCAGAGGGCATGCCTGTTTGAGCGTCATTTCTCT 360
      |||||||||||||||||||||||||||||||||||||||||||||||||||||||||||
Sbjct 301 GAACGCACATTGCGCCCTCTGGTATTCCAGAGGGCATGCCTGTTTGAGCGTCATTTCTCT 360
Query 361 CTCAAACCCCCGGGTTTGGTATTGAGTGATACTCTTAGTCGGACTAGGCGTTTGCTTGAA 420
      |||||||||||||||||||||||||||||||||||||||||||||||||||||||||||
Sbjct 361 CTCAAACCCCCGGGTTTGGTATTGAGTGATACTCTTAGTCGGACTAGGCGTTTGCTTGAA 420
Query 421 AAGTATTGGCATGGGTAGTACTAGATAGTGCTGTGACCTCTCAATGTATTAGGTTTATC 480
      |||||||||||||||||||||||||||||||||||||||||||||||||||||||||||
Sbjct 421 AAGTATTGGCATGGGTAGTACTAGATAGTGCTGTGACCTCTCAATGTATTAGGTTTATC 480
Query 481 CAACTCGTTGAATGGTGTGGCGGGATATTTCTGGTATTGTTGGCCCGGCCTTACAACAAC 540
      |||||||||||||||||||||||||||||||||||||||||||||||||||||||||||
Sbjct 481 CAACTCGTTGAATGGTGTGGCGGGATATTTCTGGTATTGTTGGCCCGGCCTTACAACAAC 540
Query 541 CAAACAAGTTTGACCTCAAATCAGGTAGGAATACCCGCTGAACTTAAGCATATCAATAAG 600
      |||||||||||||||||||||||||||||||||||||||||||||||||||||||||||
Sbjct 541 CAAACAAGTTTGACCTCAAATCAGGTAGGAATACCCGCTGAACTTAAGCATATCAATAAG 600
Query 601 CGGAGGA 607
      |||||||
Sbjct 601 CGGAGGA 607

```

>gb|EU568933.1| *Pichia guilliermondii* isolate CNRMA 200501305 18S ribosomal RNA gene, partial sequence; internal transcribed spacer 1, 5.8S ribosomal RNA gene, and internal transcribed spacer 2, complete sequence; and 28S ribosomal RNA gene, partial sequence  
Length=607

Score = 1122 bits (607), Expect = 0.0  
Identities = 607/607 (100%), Gaps = 0/607 (0%)  
Strand=Plus/Plus

```

Query 1 TCCGTAGGTGAACCTGCGGAAGGATCATTACAGTATTCTTTTGCCAGCGCTTAACTGCGC 60
      |||||||||||||||||||||||||||||||||||||||||||||||||||||||||||
Sbjct 1 TCCGTAGGTGAACCTGCGGAAGGATCATTACAGTATTCTTTTGCCAGCGCTTAACTGCGC 60
Query 61 GCGGAAAAACCTTACACACAGTGTCTTTTGTACAGAACTCTTGCTTTGGTTTGGCCTA 120
      |||||||||||||||||||||||||||||||||||||||||||||||||||||||||||
Sbjct 61 GCGGAAAAACCTTACACACAGTGTCTTTTGTACAGAACTCTTGCTTTGGTTTGGCCTA 120
Query 121 GAGATAGGTTGGGCCAGAGGTTTAACAAAACACAATTTAATTATTTTTACAGTTAGTCAA 180
      |||||||||||||||||||||||||||||||||||||||||||||||||||||||||||
Sbjct 121 GAGATAGGTTGGGCCAGAGGTTTAACAAAACACAATTTAATTATTTTTACAGTTAGTCAA 180
Query 181 ATTTTGAATTAATCTTCAAACCTTTCAACAACGGATCTCTTGGTTCTCGCATCGATGAAG 240
      |||||||||||||||||||||||||||||||||||||||||||||||||||||||||||
Sbjct 181 ATTTTGAATTAATCTTCAAACCTTTCAACAACGGATCTCTTGGTTCTCGCATCGATGAAG 240
Query 241 AACGCAGCGAAATGCGATAAGTAATATGAATTGCAGATTTTCGTGAATCATCGAATCTTT 300
      |||||||||||||||||||||||||||||||||||||||||||||||||||||||||||
Sbjct 241 AACGCAGCGAAATGCGATAAGTAATATGAATTGCAGATTTTCGTGAATCATCGAATCTTT 300

```

```

Query 301 GAACGCACATTGCGCCCTCTGGTATTCCAGAGGGCATGCCTGTTTGAGCGTCATTTCTCT 360
          |||
Sbjct 301 GAACGCACATTGCGCCCTCTGGTATTCCAGAGGGCATGCCTGTTTGAGCGTCATTTCTCT 360

Query 361 CTCAAACCCCCGGGTTTGGTATTGAGTGATACTCTTAGTCGGACTAGGCGTTTGCTTGAA 420
          |||
Sbjct 361 CTCAAACCCCCGGGTTTGGTATTGAGTGATACTCTTAGTCGGACTAGGCGTTTGCTTGAA 420

Query 421 AAGTATTGGCATGGGTAGTACTAGATAGTGCTGTTCGACCTCTCAATGTATTAGGTTTATC 480
          |||
Sbjct 421 AAGTATTGGCATGGGTAGTACTAGATAGTGCTGTTCGACCTCTCAATGTATTAGGTTTATC 480

Query 481 CAACTCGTTGAATGGTGTGGCGGGATATTTCTGGTATTGTTGGCCCGGCCTTACAACAAC 540
          |||
Sbjct 481 CAACTCGTTGAATGGTGTGGCGGGATATTTCTGGTATTGTTGGCCCGGCCTTACAACAAC 540

Query 541 CAAACAAGTTTGACCTCAAATCAGGTAGGAATACCCGCTGAACTTAAGCATATCAATAAG 600
          |||
Sbjct 541 CAAACAAGTTTGACCTCAAATCAGGTAGGAATACCCGCTGAACTTAAGCATATCAATAAG 600

Query 601 CGGAGGA 607
          |||
Sbjct 601 CGGAGGA 607

```

>gb|EU568931.1| *Pichia guilliermondii* isolate CNRMA 200501314 18S ribosomal RNA gene, partial sequence; internal transcribed spacer 1, 5.8S ribosomal RNA gene, and internal transcribed spacer 2, complete sequence; and 28S ribosomal RNA gene, partial sequence  
Length=607

Score = 1122 bits (607), Expect = 0.0  
Identities = 607/607 (100%), Gaps = 0/607 (0%)  
Strand=Plus/Plus

```

Query 1 TCCGTAGGTGAACCTGCGGAAGGATCATTACAGTATTCTTTTGCCAGCGCTTAACTGCGC 60
          |||
Sbjct 1 TCCGTAGGTGAACCTGCGGAAGGATCATTACAGTATTCTTTTGCCAGCGCTTAACTGCGC 60

Query 61 GGCGAAAAACCTTACACACAGTGTCTTTTGTACAGAACTCTTGCTTTGGTTTGGCCTA 120
          |||
Sbjct 61 GGCGAAAAACCTTACACACAGTGTCTTTTGTACAGAACTCTTGCTTTGGTTTGGCCTA 120

Query 121 GAGATAGGTTGGGCCAGAGGTTTAAACAAAACACAATTTAATTATTTTACAGTTAGTCAA 180
          |||
Sbjct 121 GAGATAGGTTGGGCCAGAGGTTTAAACAAAACACAATTTAATTATTTTACAGTTAGTCAA 180

Query 181 ATTTTGAATTAATCTTCAAACCTTTCAACAACGGATCTCTTGGTTCTCGCATCGATGAAG 240
          |||
Sbjct 181 ATTTTGAATTAATCTTCAAACCTTTCAACAACGGATCTCTTGGTTCTCGCATCGATGAAG 240

Query 241 AACGCAGCGAAATGCGATAAGTAATATGAATTGCAGATTTTCGTGAATCATCGAATCTTT 300
          |||
Sbjct 241 AACGCAGCGAAATGCGATAAGTAATATGAATTGCAGATTTTCGTGAATCATCGAATCTTT 300

Query 301 GAACGCACATTGCGCCCTCTGGTATTCCAGAGGGCATGCCTGTTTGAGCGTCATTTCTCT 360
          |||
Sbjct 301 GAACGCACATTGCGCCCTCTGGTATTCCAGAGGGCATGCCTGTTTGAGCGTCATTTCTCT 360

Query 361 CTCAAACCCCCGGGTTTGGTATTGAGTGATACTCTTAGTCGGACTAGGCGTTTGCTTGAA 420
          |||
Sbjct 361 CTCAAACCCCCGGGTTTGGTATTGAGTGATACTCTTAGTCGGACTAGGCGTTTGCTTGAA 420

```

```

Query 421 AAGTATTGGCATGGGTAGTACTAGATAGTGCTGTGCGACCTCTCAATGTATTAGGTTTATC 480
          |||
Sbjct 421 AAGTATTGGCATGGGTAGTACTAGATAGTGCTGTGCGACCTCTCAATGTATTAGGTTTATC 480

Query 481 CAACTCGTTGAATGGTGTGGCGGGATATTTCTGGTATTGTTGGCCCGGCCTTACAACAAC 540
          |||
Sbjct 481 CAACTCGTTGAATGGTGTGGCGGGATATTTCTGGTATTGTTGGCCCGGCCTTACAACAAC 540

Query 541 CAAACAAGTTTGACCTCAAATCAGGTAGGAATACCCGCTGAACTTAAGCATATCAATAAG 600
          |||
Sbjct 541 CAAACAAGTTTGACCTCAAATCAGGTAGGAATACCCGCTGAACTTAAGCATATCAATAAG 600

Query 601 CGGAGGA 607
          |||
Sbjct 601 CGGAGGA 607

```

>gb|EU568929.1| Pichia guilliermondii isolate CNRMA 200501320 18S ribosomal RNA gene, partial sequence; internal transcribed spacer 1, 5.8S ribosomal RNA gene, and internal transcribed spacer 2, complete sequence; and 28S ribosomal RNA gene, partial sequence  
Length=607

Score = 1122 bits (607), Expect = 0.0  
Identities = 607/607 (100%), Gaps = 0/607 (0%)  
Strand=Plus/Plus

```

Query 1 TCCGTAGGTGAACCTGCGGAAGGATCATTACAGTATTCTTTTGCCAGCGCTTAACTGCGC 60
          |||
Sbjct 1 TCCGTAGGTGAACCTGCGGAAGGATCATTACAGTATTCTTTTGCCAGCGCTTAACTGCGC 60

Query 61 GGCGAAAAACCTTACACACAGTGTCTTTTGATACAGAACTCTTGCTTTGGTTTGGCCTA 120
          |||
Sbjct 61 GGCGAAAAACCTTACACACAGTGTCTTTTGATACAGAACTCTTGCTTTGGTTTGGCCTA 120

Query 121 GAGATAGGTTGGGCCAGAGGTTTAACAAAACACAATTTAATTATTTTACAGTTAGTCAA 180
          |||
Sbjct 121 GAGATAGGTTGGGCCAGAGGTTTAACAAAACACAATTTAATTATTTTACAGTTAGTCAA 180

Query 181 ATTTTGAATTAATCTTCAAACTTTCAACAACGGATCTCTTGGTTCTCGCATCGATGAAG 240
          |||
Sbjct 181 ATTTTGAATTAATCTTCAAACTTTCAACAACGGATCTCTTGGTTCTCGCATCGATGAAG 240

Query 241 AACGCAGCGAAATGCGATAAGTAATATGAATTGCAGATTTTCGTGAATCATCGAATCTTT 300
          |||
Sbjct 241 AACGCAGCGAAATGCGATAAGTAATATGAATTGCAGATTTTCGTGAATCATCGAATCTTT 300

Query 301 GAACGCACATTGCGCCCTCTGGTATTCCAGAGGGCATGCCTGTTTGAGCGTCATTTCTCT 360
          |||
Sbjct 301 GAACGCACATTGCGCCCTCTGGTATTCCAGAGGGCATGCCTGTTTGAGCGTCATTTCTCT 360

Query 361 CTCAAACCCCCGGGTTTGGTATTGAGTGATACTCTTAGTCGGACTAGGCGTTTGCTTGAA 420
          |||
Sbjct 361 CTCAAACCCCCGGGTTTGGTATTGAGTGATACTCTTAGTCGGACTAGGCGTTTGCTTGAA 420

Query 421 AAGTATTGGCATGGGTAGTACTAGATAGTGCTGTGCGACCTCTCAATGTATTAGGTTTATC 480
          |||
Sbjct 421 AAGTATTGGCATGGGTAGTACTAGATAGTGCTGTGCGACCTCTCAATGTATTAGGTTTATC 480

Query 481 CAACTCGTTGAATGGTGTGGCGGGATATTTCTGGTATTGTTGGCCCGGCCTTACAACAAC 540
          |||
Sbjct 481 CAACTCGTTGAATGGTGTGGCGGGATATTTCTGGTATTGTTGGCCCGGCCTTACAACAAC 540

Query 541 CAAACAAGTTTGACCTCAAATCAGGTAGGAATACCCGCTGAACTTAAGCATATCAATAAG 600

```

```

Sbjct 541 |||||
CAAACAAGTTTGACCTCAAATCAGGTAGGAATACCCGCTGAACTTAAGCATATCAATAAG 600
Query 601 CGGAGGA 607
Sbjct 601 |||||
CGGAGGA 607

```

>gb|EU568911.1| Pichia guilliermondii 18S ribosomal RNA gene, partial sequence; internal transcribed spacer 1, 5.8S ribosomal RNA gene, and internal transcribed spacer 2, complete sequence; and 28S ribosomal RNA gene, partial sequence  
Length=607

Score = 1122 bits (607), Expect = 0.0  
Identities = 607/607 (100%), Gaps = 0/607 (0%)  
Strand=Plus/Plus

```

Query 1 TCCGTAGGTGAACCTGCGGAAGGATCATTACAGTATTCTTTTGCCAGCGCTTAACTGCGC 60
Sbjct 1 TCCGTAGGTGAACCTGCGGAAGGATCATTACAGTATTCTTTTGCCAGCGCTTAACTGCGC 60
Query 61 GGCGAAAAACCTTACACACAGTGTCTTTTGGATAACAGAACTCTTGCTTTGGTTTGGCCTA 120
Sbjct 61 GGCGAAAAACCTTACACACAGTGTCTTTTGGATAACAGAACTCTTGCTTTGGTTTGGCCTA 120
Query 121 GAGATAGGTTGGGCCAGAGGTTTAAACAAAACACAATTTAATTATTTTACAGTTAGTCAA 180
Sbjct 121 GAGATAGGTTGGGCCAGAGGTTTAAACAAAACACAATTTAATTATTTTACAGTTAGTCAA 180
Query 181 ATTTTGAATTAATCTTCAAACTTTCAACAACGGATCTCTTGGTTCTCGCATCGATGAAG 240
Sbjct 181 ATTTTGAATTAATCTTCAAACTTTCAACAACGGATCTCTTGGTTCTCGCATCGATGAAG 240
Query 241 AACGCAGCGAAATGCGATAAGTAATATGAATTGCAGATTTTCGTGAATCATCGAATCTTT 300
Sbjct 241 AACGCAGCGAAATGCGATAAGTAATATGAATTGCAGATTTTCGTGAATCATCGAATCTTT 300
Query 301 GAACGCACATTGCGCCCTCTGGTATTCCAGAGGGCATGCCTGTTTGAGCGTCATTTCTCT 360
Sbjct 301 GAACGCACATTGCGCCCTCTGGTATTCCAGAGGGCATGCCTGTTTGAGCGTCATTTCTCT 360
Query 361 CTCAAACCCCCGGGTTTGGTATTGAGTGATACTCTTAGTCGGACTAGGCGTTTGCTTGAA 420
Sbjct 361 CTCAAACCCCCGGGTTTGGTATTGAGTGATACTCTTAGTCGGACTAGGCGTTTGCTTGAA 420
Query 421 AAGTATTGGCATGGGTAGTACTAGATAGTGCTGTGACCTCTCAATGTATTAGGTTTATC 480
Sbjct 421 AAGTATTGGCATGGGTAGTACTAGATAGTGCTGTGACCTCTCAATGTATTAGGTTTATC 480
Query 481 CAACTCGTTGAATGGTGTGGCGGGATATTTCTGGTATTGTTGGCCCGGCCTTACAACAAC 540
Sbjct 481 CAACTCGTTGAATGGTGTGGCGGGATATTTCTGGTATTGTTGGCCCGGCCTTACAACAAC 540
Query 541 CAAACAAGTTTGACCTCAAATCAGGTAGGAATACCCGCTGAACTTAAGCATATCAATAAG 600
Sbjct 541 CAAACAAGTTTGACCTCAAATCAGGTAGGAATACCCGCTGAACTTAAGCATATCAATAAG 600
Query 601 CGGAGGA 607
Sbjct 601 |||||
CGGAGGA 607

```

>dbj|AB369917.1| Pichia guilliermondii genes for small subunit rRNA, ITS1, 5.8S

rRNA, ITS2 and large subunit rRNA, partial and complete sequence,  
strain: IFM 5492  
Length=631

Score = 1122 bits (607), Expect = 0.0  
Identities = 607/607 (100%), Gaps = 0/607 (0%)  
Strand=Plus/Plus

```
Query 1 TCCGTAGGTGAACCTGCGGAAGGATCATTACAGTATTCTTTTGCCAGCGCTTAACTGCGC 60
      |||
Sbjct 25 TCCGTAGGTGAACCTGCGGAAGGATCATTACAGTATTCTTTTGCCAGCGCTTAACTGCGC 84

Query 61 GGCGAAAAACCTTACACACAGTGTCTTTTGATAACAGAACTCTTGCTTTGGTTTGGCCTA 120
      |||
Sbjct 85 GGCGAAAAACCTTACACACAGTGTCTTTTGATAACAGAACTCTTGCTTTGGTTTGGCCTA 144

Query 121 GAGATAGGTTGGGCCAGAGGTTTAACAAAACACAATTTAATTATTTTACAGTTAGTCAA 180
      |||
Sbjct 145 GAGATAGGTTGGGCCAGAGGTTTAACAAAACACAATTTAATTATTTTACAGTTAGTCAA 204

Query 181 ATTTTGAATTAATCTTCAAACCTTTCAACAACGGATCTCTTGGTTCTCGCATCGATGAAG 240
      |||
Sbjct 205 ATTTTGAATTAATCTTCAAACCTTTCAACAACGGATCTCTTGGTTCTCGCATCGATGAAG 264

Query 241 AACGCAGCGAAATGCGATAAGTAATATGAATTGCAGATTTTCGTGAATCATCGAATCTTT 300
      |||
Sbjct 265 AACGCAGCGAAATGCGATAAGTAATATGAATTGCAGATTTTCGTGAATCATCGAATCTTT 324

Query 301 GAACGCACATTGCGCCCTCTGGTATTCCAGAGGGCATGCCTGTTTGAGCGTCATTTCTCT 360
      |||
Sbjct 325 GAACGCACATTGCGCCCTCTGGTATTCCAGAGGGCATGCCTGTTTGAGCGTCATTTCTCT 384

Query 361 CTCAAACCCCCGGGTTTGGTATTGAGTGATACTCTTAGTCCGACTAGGCGTTTGCTTGAA 420
      |||
Sbjct 385 CTCAAACCCCCGGGTTTGGTATTGAGTGATACTCTTAGTCCGACTAGGCGTTTGCTTGAA 444

Query 421 AAGTATTGGCATGGGTAGTACTAGATAGTGCTGTGCGACCTCTCAATGTATTAGGTTTATC 480
      |||
Sbjct 445 AAGTATTGGCATGGGTAGTACTAGATAGTGCTGTGCGACCTCTCAATGTATTAGGTTTATC 504

Query 481 CAACTCGTTGAATGGTGTGGCGGGATATTTCTGGTATTGTTGGCCCGGCCTTACAACAAC 540
      |||
Sbjct 505 CAACTCGTTGAATGGTGTGGCGGGATATTTCTGGTATTGTTGGCCCGGCCTTACAACAAC 564

Query 541 CAAACAAGTTTGACCTCAAATCAGGTAGGAATACCCGCTGAACTTAAGCATATCAATAAG 600
      |||
Sbjct 565 CAAACAAGTTTGACCTCAAATCAGGTAGGAATACCCGCTGAACTTAAGCATATCAATAAG 624

Query 601 CGGAGGA 607
      |||
Sbjct 625 CGGAGGA 631
```

>gb|EU177579.1| Pichia guilliermondii strain EQ 18S ribosomal RNA gene, partial  
sequence; internal transcribed spacer 1, 5.8S ribosomal RNA  
gene, and internal transcribed spacer 2, complete sequence;  
and 28S ribosomal RNA gene, partial sequence  
Length=607

Score = 1122 bits (607), Expect = 0.0  
Identities = 607/607 (100%), Gaps = 0/607 (0%)  
Strand=Plus/Plus

```
Query 1 TCCGTAGGTGAACCTGCGGAAGGATCATTACAGTATTCTTTTGCCAGCGCTTAACTGCGC 60
```

```

Sbjct 1      |||
TCCGTAGGTGAACCTGCGGAAGGATCATTACAGTATTCTTTTGCCAGCGCTTAACTGCGC 60

Query 61      GGCGAAAAACCTTACACACAGTGTCTTTTGGATAACAGAACTCTTGCTTTGGTTTGGCCTA 120
|||
Sbjct 61      GGCGAAAAACCTTACACACAGTGTCTTTTGGATAACAGAACTCTTGCTTTGGTTTGGCCTA 120

Query 121     GAGATAGGTTGGGCCAGAGGTTTAAACAAAACACAATTTAATTATTTTACAGTTAGTCAA 180
|||
Sbjct 121     GAGATAGGTTGGGCCAGAGGTTTAAACAAAACACAATTTAATTATTTTACAGTTAGTCAA 180

Query 181     ATTTTGAATTAATCTTCAAACCTTTCAACAACGGATCTCTTGGTTCTCGCATCGATGAAG 240
|||
Sbjct 181     ATTTTGAATTAATCTTCAAACCTTTCAACAACGGATCTCTTGGTTCTCGCATCGATGAAG 240

Query 241     AACGCAGCGAAATGCGATAAGTAATATGAATTGCAGATTTTCGTGAATCATCGAATCTTT 300
|||
Sbjct 241     AACGCAGCGAAATGCGATAAGTAATATGAATTGCAGATTTTCGTGAATCATCGAATCTTT 300

Query 301     GAACGCACATTGCGCCCTCTGGTATTCCAGAGGGCATGCCTGTTTGAGCGTCATTTCTCT 360
|||
Sbjct 301     GAACGCACATTGCGCCCTCTGGTATTCCAGAGGGCATGCCTGTTTGAGCGTCATTTCTCT 360

Query 361     CTCAAACCCCCGGGTTTGGTATTGAGTGATACTCTTAGTCGGACTAGGCGTTTGCTTGAA 420
|||
Sbjct 361     CTCAAACCCCCGGGTTTGGTATTGAGTGATACTCTTAGTCGGACTAGGCGTTTGCTTGAA 420

Query 421     AAGTATTGGCATGGGTAGTACTAGATAGTGCTGTGACCTCTCAATGTATTAGGTTTATC 480
|||
Sbjct 421     AAGTATTGGCATGGGTAGTACTAGATAGTGCTGTGACCTCTCAATGTATTAGGTTTATC 480

Query 481     CAACTCGTTGAATGGTGTGGCGGGATATTTCTGGTATTGTTGGCCCGGCCTTACAACAAC 540
|||
Sbjct 481     CAACTCGTTGAATGGTGTGGCGGGATATTTCTGGTATTGTTGGCCCGGCCTTACAACAAC 540

Query 541     CAAACAAGTTTGACCTCAAATCAGGTAGGAATACCCGCTGAACTTAAGCATATCAATAAG 600
|||
Sbjct 541     CAAACAAGTTTGACCTCAAATCAGGTAGGAATACCCGCTGAACTTAAGCATATCAATAAG 600

Query 601     CGGAGGA 607
|||
Sbjct 601     CGGAGGA 607

```

>gb|EF191048.1| Pichia guilliermondii strain HJM 18S ribosomal RNA gene, partial sequence; internal transcribed spacer 1, 5.8S ribosomal RNA gene, and internal transcribed spacer 2, complete sequence; and 28S ribosomal RNA gene, partial sequence  
Length=631

Score = 1122 bits (607), Expect = 0.0  
Identities = 607/607 (100%), Gaps = 0/607 (0%)  
Strand=Plus/Plus

```

Query 1      TCCGTAGGTGAACCTGCGGAAGGATCATTACAGTATTCTTTTGCCAGCGCTTAACTGCGC 60
|||
Sbjct 25     TCCGTAGGTGAACCTGCGGAAGGATCATTACAGTATTCTTTTGCCAGCGCTTAACTGCGC 84

Query 61      GGCGAAAAACCTTACACACAGTGTCTTTTGGATAACAGAACTCTTGCTTTGGTTTGGCCTA 120
|||
Sbjct 85      GGCGAAAAACCTTACACACAGTGTCTTTTGGATAACAGAACTCTTGCTTTGGTTTGGCCTA 144

Query 121     GAGATAGGTTGGGCCAGAGGTTTAAACAAAACACAATTTAATTATTTTACAGTTAGTCAA 180
|||

```

```

Sbjct 145 GAGATAGGTTGGGCCAGAGGTTTAACAAAACACAATTTAATTATTTTTACAGTTAGTCAA 204
Query 181 ATTTTGAATTAATCTTCAAACCTTTCAACAACGGATCTCTTGGTTCTCGCATCGATGAAG 240
      |||
Sbjct 205 ATTTTGAATTAATCTTCAAACCTTTCAACAACGGATCTCTTGGTTCTCGCATCGATGAAG 264
Query 241 AACGCAGCGAAATGCGATAAGTAATATGAATTGCAGATTTTCGTGAATCATCGAATCTTT 300
      |||
Sbjct 265 AACGCAGCGAAATGCGATAAGTAATATGAATTGCAGATTTTCGTGAATCATCGAATCTTT 324
Query 301 GAACGCACATTGCGCCCTCTGGTATTCCAGAGGGCATGCCTGTTTGAGCGTCATTTCTCT 360
      |||
Sbjct 325 GAACGCACATTGCGCCCTCTGGTATTCCAGAGGGCATGCCTGTTTGAGCGTCATTTCTCT 384
Query 361 CTCAAACCCCCGGGTTTGGTATTGAGTGATACTCTTAGTCGGACTAGGCGTTTGCTTGAA 420
      |||
Sbjct 385 CTCAAACCCCCGGGTTTGGTATTGAGTGATACTCTTAGTCGGACTAGGCGTTTGCTTGAA 444
Query 421 AAGTATTGGCATGGGTAGTACTAGATAGTGCTGTGACCTCTCAATGTATTAGGTTTATC 480
      |||
Sbjct 445 AAGTATTGGCATGGGTAGTACTAGATAGTGCTGTGACCTCTCAATGTATTAGGTTTATC 504
Query 481 CAACTCGTTGAATGGTGTGGCGGGATATTTCTGGTATTGTTGGCCCGGCCTTACAACAAC 540
      |||
Sbjct 505 CAACTCGTTGAATGGTGTGGCGGGATATTTCTGGTATTGTTGGCCCGGCCTTACAACAAC 564
Query 541 CAAACAAGTTTGACCTCAAATCAGGTAGGAATACCCGCTGAACTTAAGCATATCAATAAG 600
      |||
Sbjct 565 CAAACAAGTTTGACCTCAAATCAGGTAGGAATACCCGCTGAACTTAAGCATATCAATAAG 624
Query 601 CGGAGGA 607
      |||
Sbjct 625 CGGAGGA 631

```

>gb|DQ663478.1| Pichia guilliermondii isolate JHSd 18S ribosomal RNA gene, partial sequence; internal transcribed spacer 1, 5.8S ribosomal RNA gene, and internal transcribed spacer 2, complete sequence; and 28S ribosomal RNA gene, partial sequence  
Length=617

Score = 1122 bits (607), Expect = 0.0  
Identities = 607/607 (100%), Gaps = 0/607 (0%)  
Strand=Plus/Plus

```

Query 1 TCCGTAGGTGAACCTGCGGAAGGATCATTACAGTATTCTTTTGCCAGCGCTTAACTGCGC 60
      |||
Sbjct 11 TCCGTAGGTGAACCTGCGGAAGGATCATTACAGTATTCTTTTGCCAGCGCTTAACTGCGC 70
Query 61 GCGGAAAAACCTTACACACAGTGTCTTTTGTACAGAACTCTTGCTTTGGTTTGGCCTA 120
      |||
Sbjct 71 GCGGAAAAACCTTACACACAGTGTCTTTTGTACAGAACTCTTGCTTTGGTTTGGCCTA 130
Query 121 GAGATAGGTTGGGCCAGAGGTTTAACAAAACACAATTTAATTATTTTTACAGTTAGTCAA 180
      |||
Sbjct 131 GAGATAGGTTGGGCCAGAGGTTTAACAAAACACAATTTAATTATTTTTACAGTTAGTCAA 190
Query 181 ATTTTGAATTAATCTTCAAACCTTTCAACAACGGATCTCTTGGTTCTCGCATCGATGAAG 240
      |||
Sbjct 191 ATTTTGAATTAATCTTCAAACCTTTCAACAACGGATCTCTTGGTTCTCGCATCGATGAAG 250
Query 241 AACGCAGCGAAATGCGATAAGTAATATGAATTGCAGATTTTCGTGAATCATCGAATCTTT 300
      |||
Sbjct 251 AACGCAGCGAAATGCGATAAGTAATATGAATTGCAGATTTTCGTGAATCATCGAATCTTT 310

```



```

Query 301 GAACGCACATTGCGCCCTCTGGTATTCCAGAGGGCATGCCTGTTTGAGCGTCATTTCTCT 360
          |||
Sbjct 311 GAACGCACATTGCGCCCTCTGGTATTCCAGAGGGCATGCCTGTTTGAGCGTCATTTCTCT 370

Query 361 CTCAAACCCCCGGGTTTGGTATTGAGTGATACTCTTAGTCGGACTAGGCGTTTGCTTGAA 420
          |||
Sbjct 371 CTCAAACCCCCGGGTTTGGTATTGAGTGATACTCTTAGTCGGACTAGGCGTTTGCTTGAA 430

Query 421 AAGTATTGGCATGGGTAGTACTAGATAGTGCTGTCGACCTCTCAATGTATTAGGTTTATC 480
          |||
Sbjct 431 AAGTATTGGCATGGGTAGTACTAGATAGTGCTGTCGACCTCTCAATGTATTAGGTTTATC 490

Query 481 CAACTCGTTGAATGGTGTGGCGGGATATTTCTGGTATTGTTGGCCCGGCCTTACAACAAC 540
          |||
Sbjct 491 CAACTCGTTGAATGGTGTGGCGGGATATTTCTGGTATTGTTGGCCCGGCCTTACAACAAC 550

Query 541 CAAACAAGTTTGACCTCAAATCAGGTAGGAATACCCGCTGAACTTAAGCATATCAATAAG 600
          |||
Sbjct 551 CAAACAAGTTTGACCTCAAATCAGGTAGGAATACCCGCTGAACTTAAGCATATCAATAAG 610

Query 601 CGGAGGA 607
          |||
Sbjct 611 CGGAGGA 617

```

>gb|DQ680842.1| Pichia guilliermondii strain G7A1 18S ribosomal RNA gene, partial sequence; internal transcribed spacer 1, 5.8S ribosomal RNA gene, and internal transcribed spacer 2, complete sequence; and 28S ribosomal RNA gene, partial sequence  
Length=636

Score = 1122 bits (607), Expect = 0.0  
Identities = 607/607 (100%), Gaps = 0/607 (0%)  
Strand=Plus/Plus

```

Query 1 TCCGTAGGTGAACCTGCGGAAGGATCATTACAGTATTCTTTTGCCAGCGCTTAACTGCGC 60
          |||
Sbjct 29 TCCGTAGGTGAACCTGCGGAAGGATCATTACAGTATTCTTTTGCCAGCGCTTAACTGCGC 88

Query 61 GGCGAAAAACCTTACACACAGTGTCTTTTGTACAGAACTCTTGCTTTGGTTTGGCCTA 120
          |||
Sbjct 89 GGCGAAAAACCTTACACACAGTGTCTTTTGTACAGAACTCTTGCTTTGGTTTGGCCTA 148

Query 121 GAGATAGGTTGGGCCAGAGGTTTAACAAAACACAATTTAATTATTTTACAGTTAGTCAA 180
          |||
Sbjct 149 GAGATAGGTTGGGCCAGAGGTTTAACAAAACACAATTTAATTATTTTACAGTTAGTCAA 208

Query 181 ATTTTGAATTAATCTTCAAACCTTTCAACAACGGATCTCTTGGTTCTCGCATCGATGAAG 240
          |||
Sbjct 209 ATTTTGAATTAATCTTCAAACCTTTCAACAACGGATCTCTTGGTTCTCGCATCGATGAAG 268

Query 241 AACGCAGCGAAATGCGATAAGTAATATGAATTGCAGATTTTCGTGAATCATCGAATCTTT 300
          |||
Sbjct 269 AACGCAGCGAAATGCGATAAGTAATATGAATTGCAGATTTTCGTGAATCATCGAATCTTT 328

Query 301 GAACGCACATTGCGCCCTCTGGTATTCCAGAGGGCATGCCTGTTTGAGCGTCATTTCTCT 360
          |||
Sbjct 329 GAACGCACATTGCGCCCTCTGGTATTCCAGAGGGCATGCCTGTTTGAGCGTCATTTCTCT 388

Query 361 CTCAAACCCCCGGGTTTGGTATTGAGTGATACTCTTAGTCGGACTAGGCGTTTGCTTGAA 420
          |||
Sbjct 389 CTCAAACCCCCGGGTTTGGTATTGAGTGATACTCTTAGTCGGACTAGGCGTTTGCTTGAA 448

```

```

Query 421 AAGTATTGGCATGGGTAGTACTAGATAGTGCTGTGCGACCTCTCAATGTATTAGGTTTATC 480
          ||||||||||||||||||||||||||||||||||||||||||||||||||||||||||
Sbjct 449 AAGTATTGGCATGGGTAGTACTAGATAGTGCTGTGCGACCTCTCAATGTATTAGGTTTATC 508

Query 481 CAACTCGTTGAATGGTGTGGCGGGATATTTCTGGTATTGTTGGCCCGGCCTTACAACAAC 540
          ||||||||||||||||||||||||||||||||||||||||||||||||||||||||||
Sbjct 509 CAACTCGTTGAATGGTGTGGCGGGATATTTCTGGTATTGTTGGCCCGGCCTTACAACAAC 568

Query 541 CAAACAAGTTTGACCTCAAATCAGGTAGGAATACCCGCTGAACTTAAGCATATCAATAAG 600
          ||||||||||||||||||||||||||||||||||||||||||||||||||||||||||
Sbjct 569 CAAACAAGTTTGACCTCAAATCAGGTAGGAATACCCGCTGAACTTAAGCATATCAATAAG 628

Query 601 CGGAGGA 607
          |||||||
Sbjct 629 CGGAGGA 635

```

>gb|AY939795.1| Pichia guilliermondii isolate UR 9406-03 18S ribosomal RNA gene, partial sequence; internal transcribed spacer 1, 5.8S ribosomal RNA gene, and internal transcribed spacer 2, complete sequence; and 28S ribosomal RNA gene, partial sequence  
Length=607

Score = 1122 bits (607), Expect = 0.0  
Identities = 607/607 (100%), Gaps = 0/607 (0%)  
Strand=Plus/Plus

```

Query 1 TCCGTAGGTGAACCTGCGGAAGGATCATTACAGTATTCTTTTGCCAGCGCTTAACTGCGC 60
          ||||||||||||||||||||||||||||||||||||||||||||||||||||||||||
Sbjct 1 TCCGTAGGTGAACCTGCGGAAGGATCATTACAGTATTCTTTTGCCAGCGCTTAACTGCGC 60

Query 61 GGCGAAAAACCTTACACACAGTGTCTTTTTGATACAGAACTCTTGCTTTGGTTTGGCCTA 120
          ||||||||||||||||||||||||||||||||||||||||||||||||||||||||||
Sbjct 61 GGCGAAAAACCTTACACACAGTGTCTTTTTGATACAGAACTCTTGCTTTGGTTTGGCCTA 120

Query 121 GAGATAGGTTGGGCCAGAGGTTTAACAAAACACAATTTAATTATTTTTACAGTTAGTCAA 180
          ||||||||||||||||||||||||||||||||||||||||||||||||||||||||||
Sbjct 121 GAGATAGGTTGGGCCAGAGGTTTAACAAAACACAATTTAATTATTTTTACAGTTAGTCAA 180

Query 181 ATTTTGAATTAATCTTCAAACTTTCAACAACGGATCTCTTGGTTCTCGCATCGATGAAG 240
          ||||||||||||||||||||||||||||||||||||||||||||||||||||||||||
Sbjct 181 ATTTTGAATTAATCTTCAAACTTTCAACAACGGATCTCTTGGTTCTCGCATCGATGAAG 240

Query 241 AACGCAGCGAAATGCGATAAGTAATATGAATTGCAGATTTTCGTGAATCATCGAATCTTT 300
          ||||||||||||||||||||||||||||||||||||||||||||||||||||||||||
Sbjct 241 AACGCAGCGAAATGCGATAAGTAATATGAATTGCAGATTTTCGTGAATCATCGAATCTTT 300

Query 301 GAACGCACATTGCGCCCTCTGGTATTCCAGAGGGCATGCCTGTTTGAGCGTCATTTCTCT 360
          ||||||||||||||||||||||||||||||||||||||||||||||||||||||||||
Sbjct 301 GAACGCACATTGCGCCCTCTGGTATTCCAGAGGGCATGCCTGTTTGAGCGTCATTTCTCT 360

Query 361 CTCAAACCCCCGGGTTTGGTATTGAGTGATACTCTTAGTCGGACTAGGCGTTTGCTTGAA 420
          ||||||||||||||||||||||||||||||||||||||||||||||||||||||||||
Sbjct 361 CTCAAACCCCCGGGTTTGGTATTGAGTGATACTCTTAGTCGGACTAGGCGTTTGCTTGAA 420

Query 421 AAGTATTGGCATGGGTAGTACTAGATAGTGCTGTGCGACCTCTCAATGTATTAGGTTTATC 480
          ||||||||||||||||||||||||||||||||||||||||||||||||||||||||||
Sbjct 421 AAGTATTGGCATGGGTAGTACTAGATAGTGCTGTGCGACCTCTCAATGTATTAGGTTTATC 480

Query 481 CAACTCGTTGAATGGTGTGGCGGGATATTTCTGGTATTGTTGGCCCGGCCTTACAACAAC 540
          ||||||||||||||||||||||||||||||||||||||||||||||||||||||||||
Sbjct 481 CAACTCGTTGAATGGTGTGGCGGGATATTTCTGGTATTGTTGGCCCGGCCTTACAACAAC 540

Query 541 CAAACAAGTTTGACCTCAAATCAGGTAGGAATACCCGCTGAACTTAAGCATATCAATAAG 600

```

```

Sbjct 541 |||||
CAAACAAGTTTGACCTCAAATCAGGTAGGAATACCCGCTGAACTTAAGCATATCAATAAG 600
Query 601 CGGAGGA 607
Sbjct 601 |||||
CGGAGGA 607

```

>gb|AY939792.1| Pichia guilliermondii strain ATCC 6260 18S ribosomal RNA gene, partial sequence; internal transcribed spacer 1, 5.8S ribosomal RNA gene, and internal transcribed spacer 2, complete sequence; and 28S ribosomal RNA gene, partial sequence  
Length=607

Score = 1122 bits (607), Expect = 0.0  
Identities = 607/607 (100%), Gaps = 0/607 (0%)  
Strand=Plus/Plus

```

Query 1 TCCGTAGGTGAACCTGCGGAAGGATCATTACAGTATTCTTTTGCCAGCGCTTAACTGCGC 60
Sbjct 1 TCCGTAGGTGAACCTGCGGAAGGATCATTACAGTATTCTTTTGCCAGCGCTTAACTGCGC 60
Query 61 GGCGAAAAACCTTACACACAGTGTCTTTTGGATAACAGAACTCTTGCTTTGGTTTGGCCTA 120
Sbjct 61 GGCGAAAAACCTTACACACAGTGTCTTTTGGATAACAGAACTCTTGCTTTGGTTTGGCCTA 120
Query 121 GAGATAGGTTGGGCCAGAGGTTTAAACAAAACACAATTTAATTATTTTACAGTTAGTCAA 180
Sbjct 121 GAGATAGGTTGGGCCAGAGGTTTAAACAAAACACAATTTAATTATTTTACAGTTAGTCAA 180
Query 181 ATTTTGAATTAATCTTCAAACCTTTCAACAACGGATCTCTTGGTTCTCGCATCGATGAAG 240
Sbjct 181 ATTTTGAATTAATCTTCAAACCTTTCAACAACGGATCTCTTGGTTCTCGCATCGATGAAG 240
Query 241 AACGCAGCGAAATGCGATAAGTAATATGAATTGCAGATTTTCGTGAATCATCGAATCTTT 300
Sbjct 241 AACGCAGCGAAATGCGATAAGTAATATGAATTGCAGATTTTCGTGAATCATCGAATCTTT 300
Query 301 GAACGCACATTGCGCCCTCTGGTATTCCAGAGGGCATGCCTGTTTGAGCGTCATTTCTCT 360
Sbjct 301 GAACGCACATTGCGCCCTCTGGTATTCCAGAGGGCATGCCTGTTTGAGCGTCATTTCTCT 360
Query 361 CTCAAACCCCGGGTTTGGTATTGAGTGATACTCTTAGTCGGACTAGGCGTTTGCTTGAA 420
Sbjct 361 CTCAAACCCCGGGTTTGGTATTGAGTGATACTCTTAGTCGGACTAGGCGTTTGCTTGAA 420
Query 421 AAGTATTGGCATGGGTAGTACTAGATAGTGCTGTGACCTCTCAATGTATTAGGTTTATC 480
Sbjct 421 AAGTATTGGCATGGGTAGTACTAGATAGTGCTGTGACCTCTCAATGTATTAGGTTTATC 480
Query 481 CAACTCGTTGAATGGTGTGGCGGGATATTTCTGGTATTGTTGGCCCGGCCTTACAACAAC 540
Sbjct 481 CAACTCGTTGAATGGTGTGGCGGGATATTTCTGGTATTGTTGGCCCGGCCTTACAACAAC 540
Query 541 CAAACAAGTTTGACCTCAAATCAGGTAGGAATACCCGCTGAACTTAAGCATATCAATAAG 600
Sbjct 541 CAAACAAGTTTGACCTCAAATCAGGTAGGAATACCCGCTGAACTTAAGCATATCAATAAG 600
Query 601 CGGAGGA 607
Sbjct 601 |||||
CGGAGGA 607

```

>gb|GU385845.1| Pichia guilliermondii strain SMB 18S ribosomal RNA gene, partial

sequence; internal transcribed spacer 1, 5.8S ribosomal  
RNA gene, and internal transcribed spacer 2, complete sequence;  
and 28S ribosomal RNA gene, partial sequence  
Length=610

Score = 1120 bits (606), Expect = 0.0  
Identities = 606/606 (100%), Gaps = 0/606 (0%)  
Strand=Plus/Plus

```
Query 2 CCGTAGGTGAACCTGCGGAAGGATCATTACAGTATTCTTTTGCCAGCGCTTAACTGCGCG 61
      |||
Sbjct 1 CCGTAGGTGAACCTGCGGAAGGATCATTACAGTATTCTTTTGCCAGCGCTTAACTGCGCG 60

Query 62 GCGAAAAACCTTACACACAGTGTCTTTTGGATACAGAACTCTTGCTTTGGTTTGGCCTAG 121
      |||
Sbjct 61 GCGAAAAACCTTACACACAGTGTCTTTTGGATACAGAACTCTTGCTTTGGTTTGGCCTAG 120

Query 122 AGATAGGTTGGGCCAGAGGTTTAAACAAAACACAATTTAATTATTTTACAGTTAGTCAAA 181
      |||
Sbjct 121 AGATAGGTTGGGCCAGAGGTTTAAACAAAACACAATTTAATTATTTTACAGTTAGTCAAA 180

Query 182 TTTTGAATTAATCTTCAAAACTTTCAACAACGGATCTCTTGGTTCTCGCATCGATGAAGA 241
      |||
Sbjct 181 TTTTGAATTAATCTTCAAAACTTTCAACAACGGATCTCTTGGTTCTCGCATCGATGAAGA 240

Query 242 ACGCAGCGAAATGCGATAAGTAATATGAATTGCAGATTTTCGTGAATCATCGAATCTTTG 301
      |||
Sbjct 241 ACGCAGCGAAATGCGATAAGTAATATGAATTGCAGATTTTCGTGAATCATCGAATCTTTG 300

Query 302 AACGCACATTGCGCCCTCTGGTATTCCAGAGGGCATGCCTGTTTGGAGCGTCATTTCTCTC 361
      |||
Sbjct 301 AACGCACATTGCGCCCTCTGGTATTCCAGAGGGCATGCCTGTTTGGAGCGTCATTTCTCTC 360

Query 362 TCAAACCCCCGGGTTTGGTATTGAGTGATACTCTTAGTCGGACTAGGCGTTTGCTTGAAA 421
      |||
Sbjct 361 TCAAACCCCCGGGTTTGGTATTGAGTGATACTCTTAGTCGGACTAGGCGTTTGCTTGAAA 420

Query 422 AGTATTGGCATGGGTAGTACTAGATAGTGCTGTCGACCTCTCAATGTATTAGGTTTATCC 481
      |||
Sbjct 421 AGTATTGGCATGGGTAGTACTAGATAGTGCTGTCGACCTCTCAATGTATTAGGTTTATCC 480

Query 482 AACTCGTTGAATGGTGTGGCGGGATATTTCTGGTATTGTTGGCCCGGCCTTACAACAACC 541
      |||
Sbjct 481 AACTCGTTGAATGGTGTGGCGGGATATTTCTGGTATTGTTGGCCCGGCCTTACAACAACC 540

Query 542 AAACAAGTTTGACCTCAAATCAGGTAGGAATACCCGCTGAACTTAAGCATATCAATAAGC 601
      |||
Sbjct 541 AAACAAGTTTGACCTCAAATCAGGTAGGAATACCCGCTGAACTTAAGCATATCAATAAGC 600

Query 602 GGAGGA 607
      |||
Sbjct 601 GGAGGA 606
```

>gb|GQ334393.1| Pichia guilliermondii isolate SD 337 18S ribosomal RNA gene,  
partial sequence; internal transcribed spacer 1, 5.8S ribosomal  
RNA gene, and internal transcribed spacer 2, complete sequence;  
and 28S ribosomal RNA gene, partial sequence  
Length=609

Score = 1116 bits (604), Expect = 0.0  
Identities = 606/607 (99%), Gaps = 0/607 (0%)  
Strand=Plus/Plus

```

Query 1 TCCGTAGGTGAACCTGCGGAAGGATCATTACAGTATTCTTTTGCCAGCGCTTAACTGCGC 60
      |||
Sbjct 3 TCCGTAGGTGAACCTGCGGAAGGATCATTACAGTATTCTTTTGCCAGCGCTTAACTGCGC 62

Query 61 GGCGAAAAACCTTACACACAGTGTCTTTTGATACAGAACTCTTGCTTTGGTTTGGCCTA 120
      |||
Sbjct 63 GGCGAAAAACCTTACACACAGTGTCTTTTGATACAGAACTCTTGCTTTGGTTTGGCCTA 122

Query 121 GAGATAGGTTGGGCCAGAGGTTTAAACAAAACACAATTTAATTATTTTACAGTTAGTCAA 180
      |||
Sbjct 123 GAGATAGGTTGGGCCAGAGGTTTAAACAAAACACAATTTAATTATTTTACAGTTAGTCAA 182

Query 181 ATTTTGAATTAATCTTCAAACCTTTCAACAACGGATCTCTTGGTTCTCGCATCGATGAAG 240
      |||
Sbjct 183 ATTTTGAATTAATCTTCAAACCTTTCAACAACGGATCTCTTGGTTCTCGCATCGATGGAG 242

Query 241 AACGCAGCGAAATGCGATAAGTAATATGAATTGCAGATTTTCGTGAATCATCGAATCTTT 300
      |||
Sbjct 243 AACGCAGCGAAATGCGATAAGTAATATGAATTGCAGATTTTCGTGAATCATCGAATCTTT 302

Query 301 GAACGCACATTGCGCCCTCTGGTATTCCAGAGGGCATGCCTGTTTGAGCGTCATTTCTCT 360
      |||
Sbjct 303 GAACGCACATTGCGCCCTCTGGTATTCCAGAGGGCATGCCTGTTTGAGCGTCATTTCTCT 362

Query 361 CTCAAACCCCCGGGTTTGGTATTGAGTGATACTCTTAGTCCGACTAGGCGTTTGCTTGAA 420
      |||
Sbjct 363 CTCAAACCCCCGGGTTTGGTATTGAGTGATACTCTTAGTCCGACTAGGCGTTTGCTTGAA 422

Query 421 AAGTATTGGCATGGGTAGTACTAGATAGTGCTGTGACCTCTCAATGTATTAGGTTTATC 480
      |||
Sbjct 423 AAGTATTGGCATGGGTAGTACTAGATAGTGCTGTGACCTCTCAATGTATTAGGTTTATC 482

Query 481 CAACTCGTTGAATGGTGTGGCGGGATATTTCTGGTATTGTTGGCCCGGCCTTACAACAAC 540
      |||
Sbjct 483 CAACTCGTTGAATGGTGTGGCGGGATATTTCTGGTATTGTTGGCCCGGCCTTACAACAAC 542

Query 541 CAAACAAGTTTGACCTCAAATCAGGTAGGAATACCCGCTGAACTTAAGCATATCAATAAG 600
      |||
Sbjct 543 CAAACAAGTTTGACCTCAAATCAGGTAGGAATACCCGCTGAACTTAAGCATATCAATAAG 602

Query 601 CGGAGGA 607
      |||
Sbjct 603 CGGAGGA 609

```

>gb|FJ969194.1| Pichia guilliermondii strain UAF-214 18S ribosomal RNA gene, partial sequence; internal transcribed spacer 1, 5.8S ribosomal RNA gene, and internal transcribed spacer 2, complete sequence; and 28S ribosomal RNA gene, partial sequence  
Length=607

Score = 1116 bits (604), Expect = 0.0  
Identities = 606/607 (99%), Gaps = 0/607 (0%)  
Strand=Plus/Plus

```

Query 1 TCCGTAGGTGAACCTGCGGAAGGATCATTACAGTATTCTTTTGCCAGCGCTTAACTGCGC 60
      |||
Sbjct 1 TCCGTAGGTGAACCTGCGGAAGGATCATTACAGTATTCTTTTGCCAGCGCTTAACTGCGC 60

Query 61 GGCGAAAAACCTTACACACAGTGTCTTTTGATACAGAACTCTTGCTTTGGTTTGGCCTA 120
      |||
Sbjct 61 GGCGAAAAACCTTACACACAGTGTCTTTTGATACAGAACTCTTGCTTTGGTTTGGCCTA 120

Query 121 GAGATAGGTTGGGCCAGAGGTTTAAACAAAACACAATTTAATTATTTTACAGTTAGTCAA 180

```

```

Sbjct 121  |||||GAGATAGGTTGGGCCAGAGGTTTAAACAAAACACAATTTAATTATTTTACAGTTAGTCAA 180
Query 181  ATTTTGAATTAATCTTCAAACCTTTCAACAACGGATCTCTTGGTTCTCGCATCGATGAAG 240
Sbjct 181  |||||ATTTTGAATTAATCTTCAAACCTTTCAACAACGGATCTCTTGGTTCTCGCATCGATGAAG 240
Query 241  AACGCAGCGAAATGCGATAAGTAATATGAATTGCAGATTTTCGTGAATCATCGAATCTTT 300
Sbjct 241  |||||AACGCAGCGAAATGCGATAAGTAATATGAATTGCAGATTTTCGTGAATCATCGAATCTTT 300
Query 301  GAACGCACATTGCGCCCTCTGGTATTCCAGAGGGCATGCCTGTTTGAGCGTCATTTCTCT 360
Sbjct 301  |||||GAACGCACATTGCGCCCTCTGGTATTCCAGAGGGCATGCCTGTTTGAGCGTCATTTCTCT 360
Query 361  CTCAAACCCCGGGTTTGGTATTGAGTGATACTCTTAGTCGGACTAGGCGTTTGCTTGAA 420
Sbjct 361  |||||CTCAAACCCCGGGTTTGGTATTGAGTGATACTCTTAGTCGGACTAGGCGTTTGCTTGAA 420
Query 421  AAGTATTGGCATGGGTAGTACTAGATAGTGCTGTGACCTCTCAATGTATTAGGTTTATC 480
Sbjct 421  |||||AAGTATTGGCATGGGTAGTACTGGATAGTGCTGTGACCTCTCAATGTATTAGGTTTATC 480
Query 481  CAACTCGTTGAATGGTGTGGCGGGATATTTCTGGTATTGTTGGCCCGGCCTTACAACAAC 540
Sbjct 481  |||||CAACTCGTTGAATGGTGTGGCGGGATATTTCTGGTATTGTTGGCCCGGCCTTACAACAAC 540
Query 541  CAAACAAGTTTGACCTCAAATCAGGTAGGAATACCCGCTGAACTTAAGCATATCAATAAG 600
Sbjct 541  |||||CAAACAAGTTTGACCTCAAATCAGGTAGGAATACCCGCTGAACTTAAGCATATCAATAAG 600
Query 601  CGGAGGA 607
Sbjct 601  |||||CGGAGGA 607

```

>gb|EU568993.1| Pichia guilliermondii isolate CNRMA 200500950 18S ribosomal RNA gene, partial sequence; internal transcribed spacer 1, 5.8S ribosomal RNA gene, and internal transcribed spacer 2, complete sequence; and 28S ribosomal RNA gene, partial sequence  
Length=607

Score = 1116 bits (604), Expect = 0.0  
Identities = 606/607 (99%), Gaps = 0/607 (0%)  
Strand=Plus/Plus

```

Query 1 TCCGTAGGTGAACCTGCGGAAGGATCATTACAGTATTCTTTTGCCAGCGCTTAACTGCGC 60
Sbjct 1 TCCGTAGGTGAACCTGCGGAAGGATCATTACAGTATTCTTTTGCCAGCGCTTAACTGCGC 60
Query 61 GGCGAAAAACCTTACACACAGTGTCTTTTGATAACAGAACTCTTGCTTTGGTTTGGCCTA 120
Sbjct 61 GGCGAAAAACCTTACACACAGTGTCTTTTGATAACAGAACTCTTGCTTTGGTTTGGCCTA 120
Query 121 GAGATAGGTTGGGCCAGAGGTTTAAACAAAACACAATTTAATTATTTTACAGTTAGTCAA 180
Sbjct 121 GAGATAGGTTGGGCCAGAGGTTTAAACAAAACACAATTTAATTATTTTACAGTTAGTCAA 180
Query 181 ATTTTGAATTAATCTTCAAACCTTTCAACAACGGATCTCTTGGTTCTCGCATCGATGAAG 240
Sbjct 181 ATTTTGAATTAATCTTCAAACCTTTCAACAACGGATCTCTTGGTTCTCGCATCGATGAAG 240
Query 241 AACGCAGCGAAATGCGATAAGTAATATGAATTGCAGATTTTCGTGAATCATCGAATCTTT 300
Sbjct 241 |||||AACGCAGCGAAATGCGATAAGTAATATGAATTGCAGATTTTCGTGAATCATCGAATCTTT 300

```

```

Sbjct 241 AACGCAGCGAAATGCGATAAGTAATATGAATTGCAGATTTTCGTGAATCATCGAATCTTT 300
Query 301 GAACGCACATTGCGCCCTCTGGTATTCCAGAGGGCATGCCTGTTTGAGCGTCATTTCTCT 360
      |||
Sbjct 301 GAACGCACATTGCGCCCTCTGGTATTCCAGAGGGCATGCCTGTTTGAGCGTCATTTCTCT 360
Query 361 CTCAAACCCCCGGGTTTGGTATTGAGTGATACTCTTAGTCGGACTAGGCGTTTGCTTGAA 420
      |||
Sbjct 361 CTCAAACCCCCGGGTTTGGTATTGAGTGATACTCTTAGTCGGACTAGGCGTTTGCTTGAA 420
Query 421 AAGTATTGGCATGGGTAGTACTAGATAGTGCTGTTCGACCTCTCAATGTATTAGGTTTATC 480
      |||
Sbjct 421 AAGTATTGGCATGGGTAGTACTGGATAGTGCTGTTCGACCTCTCAATGTATTAGGTTTATC 480
Query 481 CAACTCGTTGAATGGTGTGGCGGGATATTTCTGGTATTGTTGGCCCGGCCTTACAACAAC 540
      |||
Sbjct 481 CAACTCGTTGAATGGTGTGGCGGGATATTTCTGGTATTGTTGGCCCGGCCTTACAACAAC 540
Query 541 CAAACAAGTTTGACCTCAAATCAGGTAGGAATACCCGCTGAACTTAAGCATATCAATAAG 600
      |||
Sbjct 541 CAAACAAGTTTGACCTCAAATCAGGTAGGAATACCCGCTGAACTTAAGCATATCAATAAG 600
Query 601 CGGAGGA 607
      |||
Sbjct 601 CGGAGGA 607

```

>gb|EU568991.1| *Pichia guilliermondii* isolate CNRMA 200501319 18S ribosomal RNA gene, partial sequence; internal transcribed spacer 1, 5.8S ribosomal RNA gene, and internal transcribed spacer 2, complete sequence; and 28S ribosomal RNA gene, partial sequence  
Length=607

Score = 1116 bits (604), Expect = 0.0  
Identities = 606/607 (99%), Gaps = 0/607 (0%)  
Strand=Plus/Plus

```

Query 1 TCCGTAGGTGAACCTGCGGAAGGATCATTACAGTATTCTTTTGCCAGCGCTTAACTGCGC 60
      |||
Sbjct 1 TCCGTAGGTGAACCTGCGGAAGGATCATTACAGTATTCTTTTGCCAGCGCTTAACTGCGC 60
Query 61 GGCGAAAAACCTTACACACAGTGTCTTTTGATACAGAACTCTTGCTTTGGTTTGGCCTA 120
      |||
Sbjct 61 GGCGAAAAACCTTACACACAGTGTCTTTTGATACAGAACTCTTGCTTTGGTTTGGCCTA 120
Query 121 GAGATAGGTTGGGCCAGAGGTTTAACAAAACACAATTTAATTATTTTACAGTTAGTCAA 180
      |||
Sbjct 121 GAGATAGGTTGGGCCAGAGGTTTAACAAAACACAATTTAATTATTTTACAGTTAGTCAA 180
Query 181 ATTTTGAATTAATCTTCAAACCTTTCAACAACGGATCTCTTGGTTCTCGCATCGATGAAG 240
      |||
Sbjct 181 ATTTTGAATTAATCTTCAAACCTTTCAACAACGGATCTCTTGGTTCTCGCATCGATGAAG 240
Query 241 AACGCAGCGAAATGCGATAAGTAATATGAATTGCAGATTTTCGTGAATCATCGAATCTTT 300
      |||
Sbjct 241 AACGCAGCGAAATGCGATAAGTAATATGAATTGCAGATTTTCGTGAATCATCGAATCTTT 300
Query 301 GAACGCACATTGCGCCCTCTGGTATTCCAGAGGGCATGCCTGTTTGAGCGTCATTTCTCT 360
      |||
Sbjct 301 GAACGCACATTGCGCCCTCTGGTATTCCAGAGGGCATGCCTGTTTGAGCGTCATTTCTCT 360
Query 361 CTCAAACCCCCGGGTTTGGTATTGAGTGATACTCTTAGTCGGACTAGGCGTTTGCTTGAA 420
      |||
Sbjct 361 CTCAAACCCCCGGGTTTGGTATTGAGTGATACTCTTAGTCGGACTAGGCGTTTGCTTGAA 420

```

```

Query 421 AAGTATTGGCATGGGTAGTACTAGATAGTGCTGTGCGACCTCTCAATGTATTAGGTTTATC 480
          |||
Sbjct 421 AAGTATTGGCATGGGTAGTACTGGATAGTGCTGTGCGACCTCTCAATGTATTAGGTTTATC 480

Query 481 CAACTCGTTGAATGGTGTGGCGGGATATTTCTGGTATTGTTGGCCCGGCCTTACAACAAC 540
          |||
Sbjct 481 CAACTCGTTGAATGGTGTGGCGGGATATTTCTGGTATTGTTGGCCCGGCCTTACAACAAC 540

Query 541 CAAACAAGTTTGGACCTCAAATCAGGTAGGAATACCCGCTGAACTTAAGCATATCAATAAG 600
          |||
Sbjct 541 CAAACAAGTTTGGACCTCAAATCAGGTAGGAATACCCGCTGAACTTAAGCATATCAATAAG 600

Query 601 CGGAGGA 607
          |||
Sbjct 601 CGGAGGA 607

```

>gb|EU568989.1| Pichia guilliermondii isolate CNRMA 200501343 18S ribosomal RNA gene, partial sequence; internal transcribed spacer 1, 5.8S ribosomal RNA gene, and internal transcribed spacer 2, complete sequence; and 28S ribosomal RNA gene, partial sequence  
Length=607

Score = 1116 bits (604), Expect = 0.0  
Identities = 606/607 (99%), Gaps = 0/607 (0%)  
Strand=Plus/Plus

```

Query 1 TCCGTAGGTGAACCTGCGGAAGGATCATTACAGTATTCTTTTGCCAGCGCTTAACTGCGC 60
          |||
Sbjct 1 TCCGTAGGTGAACCTGCGGAAGGATCATTACAGTATTCTTTTGCCAGCGCTTAACTGCGC 60

Query 61 GGCGAAAAACCTTACACACAGTGTCTTTTGGATACAGAACTCTTGCTTTGGTTTGGCCTA 120
          |||
Sbjct 61 GGCGAAAAACCTTACACACAGTGTCTTTTGGATACAGAACTCTTGCTTTGGTTTGGCCTA 120

Query 121 GAGATAGGTTGGGCCAGAGGTTTAACAAAACACAATTTAATTATTTTACAGTTAGTCAA 180
          |||
Sbjct 121 GAGATAGGTTGGGCCAGAGGTTTAACAAAACACAATTTAATTATTTTACAGTTAGTCAA 180

Query 181 ATTTTGAATTAATCTTCAAACTTTCAACAACGGATCTCTTGGTTCTCGCATCGATGAAG 240
          |||
Sbjct 181 ATTTTGAATTAATCTTCAAACTTTCAACAACGGATCTCTTGGTTCTCGCATCGATGAAG 240

Query 241 AACGCAGCGAAATGCGATAAGTAATATGAATTGCAGATTTTCGTGAATCATCGAATCTTT 300
          |||
Sbjct 241 AACGCAGCGAAATGCGATAAGTAATATGAATTGCAGATTTTCGTGAATCATCGAATCTTT 300

Query 301 GAACGCACATTGCGCCCTCTGGTATTCCAGAGGGCATGCCTGTTTGAGCGTCATTTCTCT 360
          |||
Sbjct 301 GAACGCACATTGCGCCCTCTGGTATTCCAGAGGGCATGCCTGTTTGAGCGTCATTTCTCT 360

Query 361 CTCAAACCCCCGGGTTTGGTATTGAGTGATACTCTTAGTTCGGACTAGGCGTTTGCTTGAA 420
          |||
Sbjct 361 CTCAAACCCCCGGGTTTGGTATTGAGTGATACTCTTAGTTCGGACTAGGCGTTTGCTTGAA 420

Query 421 AAGTATTGGCATGGGTAGTACTAGATAGTGCTGTGCGACCTCTCAATGTATTAGGTTTATC 480
          |||
Sbjct 421 AAGTATTGGCATGGGTAGTACTGGATAGTGCTGTGCGACCTCTCAATGTATTAGGTTTATC 480

Query 481 CAACTCGTTGAATGGTGTGGCGGGATATTTCTGGTATTGTTGGCCCGGCCTTACAACAAC 540
          |||
Sbjct 481 CAACTCGTTGAATGGTGTGGCGGGATATTTCTGGTATTGTTGGCCCGGCCTTACAACAAC 540

```



```

Query 541 CAAACAAGTTTGGACCTCAAATCAGGTAGGAATACCCGCTGAACTTAAGCATATCAATAAG 600
          ||||||||||||||||||||||||||||||||||||||||||||||||||||||||||
Sbjct 541 CAAACAAGTTTGGACCTCAAATCAGGTAGGAATACCCGCTGAACTTAAGCATATCAATAAG 600

Query 601 CGGAGGA 607
          |||||||
Sbjct 601 CGGAGGA 607

```

>gb|EU568987.1| Pichia guilliermondii isolate CNRMA 200600803 18S ribosomal RNA gene, partial sequence; internal transcribed spacer 1, 5.8S ribosomal RNA gene, and internal transcribed spacer 2, complete sequence; and 28S ribosomal RNA gene, partial sequence  
Length=607

Score = 1116 bits (604), Expect = 0.0  
Identities = 606/607 (99%), Gaps = 0/607 (0%)  
Strand=Plus/Plus

```

Query 1 TCCGTAGGTGAACCTGCGGAAGGATCATTACAGTATTCTTTTGCCAGCGCTTAACTGCGC 60
          ||||||||||||||||||||||||||||||||||||||||||||||||||||||||||
Sbjct 1 TCCGTAGGTGAACCTGCGGAAGGATCATTACAGTATTCTTTTGCCAGCGCTTAACTGCGC 60

Query 61 GGCGAAAAACCTTACACACAGTGTCTTTTGGATACAGAACTCTTGCTTTGGTTTGGCCTA 120
          ||||||||||||||||||||||||||||||||||||||||||||||||||||||||||
Sbjct 61 GGCGAAAAACCTTACACACAGTGTCTTTTGGATACAGAACTCTTGCTTTGGTTTGGCCTA 120

Query 121 GAGATAGGTTGGGCCAGAGGTTTAAACAAAACACAATTTAATTATTTTACAGTTAGTCAA 180
          ||||||||||||||||||||||||||||||||||||||||||||||||||||||||||
Sbjct 121 GAGATAGGTTGGGCCAGAGGTTTAAACAAAACACAATTTAATTATTTTACAGTTAGTCAA 180

Query 181 ATTTTGAATTAATCTTCAAACCTTTCAACAACGGATCTCTTGGTTCTCGCATCGATGAAG 240
          ||||||||||||||||||||||||||||||||||||||||||||||||||||||||||
Sbjct 181 ATTTTGAATTAATCTTCAAACCTTTCAACAACGGATCTCTTGGTTCTCGCATCGATGAAG 240

Query 241 AACGCAGCGAAATGCGATAAGTAATATGAATTGCAGATTTTCGTGAATCATCGAATCTTT 300
          ||||||||||||||||||||||||||||||||||||||||||||||||||||||||||
Sbjct 241 AACGCAGCGAAATGCGATAAGTAATATGAATTGCAGATTTTCGTGAATCATCGAATCTTT 300

Query 301 GAACGCACATTGCGCCCTCTGGTATTCCAGAGGGCATGCCTGTTTGAGCGTCATTTCTCT 360
          ||||||||||||||||||||||||||||||||||||||||||||||||||||||||||
Sbjct 301 GAACGCACATTGCGCCCTCTGGTATTCCAGAGGGCATGCCTGTTTGAGCGTCATTTCTCT 360

Query 361 CTCAAACCCCCGGGTTTGGTATTGAGTGATACTCTTAGTCGGACTAGGCGTTTGCTTGAA 420
          ||||||||||||||||||||||||||||||||||||||||||||||||||||||||||
Sbjct 361 CTCAAACCCCCGGGTTTGGTATTGAGTGATACTCTTAGTCGGACTAGGCGTTTGCTTGAA 420

Query 421 AAGTATTGGCATGGGTAGTACTAGATAGTGCTGTGACCTCTCAATGTATTAGGTTTATC 480
          ||||||||||||||||||||||||||||||||||||||||||||||||||||||||||
Sbjct 421 AAGTATTGGCATGGGTAGTACTAGATAGTGCTGTGACCTCTCAATGTATTAGGTTTATC 480

Query 481 CAACTCGTTGAATGGTGTGGCGGGATATTTCTGGTATTGTTGGCCCGGCCTTACAACAAC 540
          ||||||||||||||||||||||||||||||||||||||||||||||||||||||||||
Sbjct 481 CAACTCGTTGAATGGTGTGGCGGGATATTTCTGGTATTGTTGGCCCGGCCTTACAACAAC 540

Query 541 CAAACAAGTTTGGACCTCAAATCAGGTAGGAATACCCGCTGAACTTAAGCATATCAATAAG 600
          ||||||||||||||||||||||||||||||||||||||||||||||||||||||||||
Sbjct 541 CAAACAAGTTTGGACCTCAAATCAGGTAGGAATACCCGCTGAACTTAAGCATATCAATAAG 600

Query 601 CGGAGGA 607
          |||||||
Sbjct 601 CGGAGGA 607

```

>gb|EU568985.1| Pichia guilliermondii isolate CNRMA 200601042 18S ribosomal RNA gene, partial sequence; internal transcribed spacer 1, 5.8S ribosomal RNA gene, and internal transcribed spacer 2, complete sequence; and 28S ribosomal RNA gene, partial sequence  
Length=607

Score = 1116 bits (604), Expect = 0.0  
Identities = 606/607 (99%), Gaps = 0/607 (0%)  
Strand=Plus/Plus

```
Query 1 TCCGTAGGTGAACCTGCGGAAGGATCATTACAGTATTCTTTTGCCAGCGCTTAACTGCGC 60
      |||
Sbjct 1 TCCGTAGGTGAACCTGCGGAAGGATCATTACAGTATTCTTTTGCCAGCGCTTAACTGCGC 60

Query 61 GGCGAAAAACCTTACACACAGTGTCTTTTGATAACAGAACTCTTGCTTTGGTTTGGCCTA 120
      |||
Sbjct 61 GGCGAAAAACCTTACACACAGTGTCTTTTGATAACAGAACTCTTGCTTTGGTTTGGCCTA 120

Query 121 GAGATAGGTTGGGCCAGAGGTTTAAACAAAACACAATTTAATTATTTTACAGTTAGTCAA 180
      |||
Sbjct 121 GAGATAGGTTGGGCCAGAGGTTTAAACAAAACACAATTTAATTATTTTACAGTTAGTCAA 180

Query 181 ATTTTGAATTAATCTTCAAACCTTTCAACAACGGATCTCTTGGTTCTCGCATCGATGAAG 240
      |||
Sbjct 181 ATTTTGAATTAATCTTCAAACCTTTCAACAACGGATCTCTTGGTTCTCGCATCGATGAAG 240

Query 241 AACGCAGCGAAATGCGATAAGTAATATGAATTGCAGATTTTCGTGAATCATCGAATCTTT 300
      |||
Sbjct 241 AACGCAGCGAAATGCGATAAGTAATATGAATTGCAGATTTTCGTGAATCATCGAATCTTT 300

Query 301 GAACGCACATTGCGCCCTCTGGTATTCCAGAGGGCATGCCTGTTTGAGCGTCATTTCTCT 360
      |||
Sbjct 301 GAACGCACATTGCGCCCTCTGGTATTCCAGAGGGCATGCCTGTTTGAGCGTCATTTCTCT 360

Query 361 CTCAAACCCCCGGGTTTGGTATTGAGTGATACTCTTAGTCGGACTAGGCGTTTGCTTGAA 420
      |||
Sbjct 361 CTCAAACCCCCGGGTTTGGTATTGAGTGATACTCTTAGTCGGACTAGGCGTTTGCTTGAA 420

Query 421 AAGTATTGGCATGGGTAGTACTAGATAGTGCTGTGACCTCTCAATGTATTAGGTTTATC 480
      |||
Sbjct 421 AAGTATTGGCATGGGTAGTACTAGATAGTGCTGTGACCTCTCAATGTATTAGGTTTATC 480

Query 481 CAACTCGTTGAATGGTGTGGCGGGATATTTCTGGTATTGTTGGCCCGGCCTTACAACAAC 540
      |||
Sbjct 481 CAACTCGTTGAATGGTGTGGCGGGATATTTCTGGTATTGTTGGCCCGGCCTTACAACAAC 540

Query 541 CAAACAAGTTTGACCTCAAATCAGGTAGGAATACCCGCTGAACTTAAGCATATCAATAAG 600
      |||
Sbjct 541 CAAACAAGTTTGACCTCAAATCAGGTAGGAATACCCGCTGAACTTAAGCATATCAATAAG 600

Query 601 CGGAGGA 607
      |||
Sbjct 601 CGGAGGA 607
```

>gb|EU568983.1| Pichia guilliermondii isolate CNRMA 200500719 18S ribosomal RNA gene, partial sequence; internal transcribed spacer 1, 5.8S ribosomal RNA gene, and internal transcribed spacer 2, complete sequence; and 28S ribosomal RNA gene, partial sequence  
Length=607

Score = 1116 bits (604), Expect = 0.0  
Identities = 606/607 (99%), Gaps = 0/607 (0%)  
Strand=Plus/Plus

```

Query 1 TCCGTAGGTGAACCTGCGGAAGGATCATTACAGTATTCTTTTGCCAGCGCTTAACTGCGC 60
      |||
Sbjct 1 TCCGTAGGTGAACCTGCGGAAGGATCATTACAGTATTCTTTTGCCAGCGCTTAACTGCGC 60

Query 61 GGCGAAAAACCTTACACACAGTGTCTTTTGATACAGAACTCTTGCTTTGGTTTGGCCTA 120
      |||
Sbjct 61 GGCGAAAAACCTTACACACAGTGTCTTTTGATACAGAACTCTTGCTTTGGTTTGGCCTA 120

Query 121 GAGATAGGTTGGGCCAGAGGTTTAAACAAAACACAATTTAATTATTTTACAGTTAGTCAA 180
      |||
Sbjct 121 GAGATAGGTTGGGCCAGAGGTTTAAACAAAACACAATTTAATTATTTTACAGTTAGTCAA 180

Query 181 ATTTTGAATTAATCTTCAAAACTTTCAACAACGGATCTCTTGGTTCTCGCATCGATGAAG 240
      |||
Sbjct 181 ATTTTGAATTAATCTTCAAAACTTTCAACAACGGATCTCTTGGTTCTCGCATCGATGAAG 240

Query 241 AACGCAGCGAAATGCGATAAGTAATATGAATTGCAGATTTTCGTGAATCATCGAATCTTT 300
      |||
Sbjct 241 AACGCAGCGAAATGCGATAAGTAATATGAATTGCAGATTTTCGTGAATCATCGAATCTTT 300

Query 301 GAACGCACATTGCGCCCTCTGGTATTCCAGAGGGCATGCCTGTTTGAGCGTCATTTCTCT 360
      |||
Sbjct 301 GAACGCACATTGCGCCCTCTGGTATTCCAGAGGGCATGCCTGTTTGAGCGTCATTTCTCT 360

Query 361 CTCAAACCCCCGGGTTTGGTATTGAGTGATACTCTTAGTCGGACTAGGCGTTTGCTTGAA 420
      |||
Sbjct 361 CTCAAACCCCCGGGTTTGGTATTGAGTGATACTCTTAGTCGGACTAGGCGTTTGCTTGAA 420

Query 421 AAGTATTGGCATGGGTAGTACTAGATAGTGCTGTGACCTCTCAATGTATTAGGTTTATC 480
      |||
Sbjct 421 AAGTATTGGCATGGGTAGTACTGGATAGTGCTGTGACCTCTCAATGTATTAGGTTTATC 480

Query 481 CAACTCGTTGAATGGTGTGGCGGGATATTTCTGGTATTGTTGGCCCGGCCTTACAACAAC 540
      |||
Sbjct 481 CAACTCGTTGAATGGTGTGGCGGGATATTTCTGGTATTGTTGGCCCGGCCTTACAACAAC 540

Query 541 CAAACAAGTTTGACCTCAAATCAGGTAGGAATACCCGCTGAACTTAAGCATATCAATAAG 600
      |||
Sbjct 541 CAAACAAGTTTGACCTCAAATCAGGTAGGAATACCCGCTGAACTTAAGCATATCAATAAG 600

Query 601 CGGAGGA 607
      |||
Sbjct 601 CGGAGGA 607

```

>gb|EU568981.1| Pichia guilliermondii isolate CNRMA 200601191 18S ribosomal RNA gene, partial sequence; internal transcribed spacer 1, 5.8S ribosomal RNA gene, and internal transcribed spacer 2, complete sequence; and 28S ribosomal RNA gene, partial sequence  
Length=607

Score = 1116 bits (604), Expect = 0.0  
Identities = 606/607 (99%), Gaps = 0/607 (0%)  
Strand=Plus/Plus

```

Query 1 TCCGTAGGTGAACCTGCGGAAGGATCATTACAGTATTCTTTTGCCAGCGCTTAACTGCGC 60
      |||
Sbjct 1 TCCGTAGGTGAACCTGCGGAAGGATCATTACAGTATTCTTTTGCCAGCGCTTAACTGCGC 60

Query 61 GGCGAAAAACCTTACACACAGTGTCTTTTGATACAGAACTCTTGCTTTGGTTTGGCCTA 120
      |||
Sbjct 61 GGCGAAAAACCTTACACACAGTGTCTTTTGATACAGAACTCTTGCTTTGGTTTGGCCTA 120

```

```

Query 121 GAGATAGGTTGGGCCAGAGGTTTAACAAAACACAATTTAATTATTTTTACAGTTAGTCAA 180
          |||
Sbjct 121 GAGATAGGTTGGGCCAGAGGTTTAACAAAACACAATTTAATTATTTTTACAGTTAGTCAA 180

Query 181 ATTTTGAATTAATCTTCAAACCTTTCAACAACGGATCTCTTGGTTCTCGCATCGATGAAG 240
          |||
Sbjct 181 ATTTTGAATTAATCTTCAAACCTTTCAACAACGGATCTCTTGGTTCTCGCATCGATGAAG 240

Query 241 AACGCAGCGAAATGCGATAAGTAATATGAATTGCAGATTTTCGTGAATCATCGAATCTTT 300
          |||
Sbjct 241 AACGCAGCGAAATGCGATAAGTAATATGAATTGCAGATTTTCGTGAATCATCGAATCTTT 300

Query 301 GAACGCACATTGCGCCCTCTGGTATTCCAGAGGGCATGCCTGTTTGAGCGTCATTTCTCT 360
          |||
Sbjct 301 GAACGCACATTGCGCCCTCTGGTATTCCAGAGGGCATGCCTGTTTGAGCGTCATTTCTCT 360

Query 361 CTCAAACCCCGGTTTGGTATTGAGTGATACTCTTAGTCGGACTAGGCGTTTGCTTGAA 420
          |||
Sbjct 361 CTCAAACCCCGGTTTGGTATTGAGTGATACTCTTAGTCGGACTAGGCGTTTGCTTGAA 420

Query 421 AAGTATTGGCATGGGTAGTACTAGATAGTGCTGTCGACCTCTCAATGTATTAGGTTTATC 480
          |||
Sbjct 421 AAGTATTGGCATGGGTAGTACTGGATAGTGCTGTCGACCTCTCAATGTATTAGGTTTATC 480

Query 481 CAACTCGTTGAATGGTGTGGCGGGATATTTCTGGTATTGTTGGCCCGGCCTTACAACAAC 540
          |||
Sbjct 481 CAACTCGTTGAATGGTGTGGCGGGATATTTCTGGTATTGTTGGCCCGGCCTTACAACAAC 540

Query 541 CAAACAAGTTTGACCTCAAATCAGGTAGGAATACCCGCTGAACTTAAGCATATCAATAAG 600
          |||
Sbjct 541 CAAACAAGTTTGACCTCAAATCAGGTAGGAATACCCGCTGAACTTAAGCATATCAATAAG 600

Query 601 CGGAGGA 607
          |||
Sbjct 601 CGGAGGA 607

```

>gb|EU568979.1| Pichia guilliermondii isolate CNRMA 200700040 18S ribosomal RNA gene, partial sequence; internal transcribed spacer 1, 5.8S ribosomal RNA gene, and internal transcribed spacer 2, complete sequence; and 28S ribosomal RNA gene, partial sequence  
Length=607

Score = 1116 bits (604), Expect = 0.0  
Identities = 606/607 (99%), Gaps = 0/607 (0%)  
Strand=Plus/Plus

```

Query 1 TCCGTAGGTGAACCTGCGGAAGGATCATTACAGTATTCTTTTGCCAGCGCTTAACTGCGC 60
          |||
Sbjct 1 TCCGTAGGTGAACCTGCGGAAGGATCATTACAGTATTCTTTTGCCAGCGCTTAACTGCGC 60

Query 61 GGCGAAAAACCTTACACACAGTGTCTTTTGATAACAGAACTCTTGCTTTGGTTTGGCCTA 120
          |||
Sbjct 61 GGCGAAAAACCTTACACACAGTGTCTTTTGATAACAGAACTCTTGCTTTGGTTTGGCCTA 120

Query 121 GAGATAGGTTGGGCCAGAGGTTTAACAAAACACAATTTAATTATTTTTACAGTTAGTCAA 180
          |||
Sbjct 121 GAGATAGGTTGGGCCAGAGGTTTAACAAAACACAATTTAATTATTTTTACAGTTAGTCAA 180

Query 181 ATTTTGAATTAATCTTCAAACCTTTCAACAACGGATCTCTTGGTTCTCGCATCGATGAAG 240
          |||
Sbjct 181 ATTTTGAATTAATCTTCAAACCTTTCAACAACGGATCTCTTGGTTCTCGCATCGATGAAG 240

Query 241 AACGCAGCGAAATGCGATAAGTAATATGAATTGCAGATTTTCGTGAATCATCGAATCTTT 300

```

```

Sbjct 241  |||||
AACGCAGCGAAATGCGATAAGTAATATGAATTGCAGATTTTCGTGAATCATCGAATCTTT 300
Query 301  GAACGCACATTGCGCCCTCTGGTATTCCAGAGGGCATGCCTGTTTGAGCGTCATTTCTCT 360
Sbjct 301  |||||
GAACGCACATTGCGCCCTCTGGTATTCCAGAGGGCATGCCTGTTTGAGCGTCATTTCTCT 360
Query 361  CTCAAACCCCCGGGTTTGGTATTGAGTGATACTCTTAGTCGGACTAGGCGTTTGCTTGAA 420
Sbjct 361  |||||
CTCAAACCCCCGGGTTTGGTATTGAGTGATACTCTTAGTCGGACTAGGCGTTTGCTTGAA 420
Query 421  AAGTATTGGCATGGGTAGTACTAGATAGTGCTGTTCGACCTCTCAATGTATTAGGTTTATC 480
Sbjct 421  |||||
AAGTATTGGCATGGGTAGTACTAGATAGTGCTGTTCGACCTCTCAATGTATTAGGTTTATC 480
Query 481  CAACTCGTTGAATGGTGTGGCGGGATATTTCTGGTATTGTTGGCCCGGCCTTACAACAAC 540
Sbjct 481  |||||
CAACTCGTTGAATGGTGTGGCGGGATATTTCTGGTATTGTTGGCCCGGCCTTACAACAAC 540
Query 541  CAAACAAGTTTGACCTCAAATCAGGTAGGAATACCCGCTGAACTTAAGCATATCAATAAG 600
Sbjct 541  |||||
CAAACAAGTTTGACCTCAAATCAGGTAGGAATACCCGCTGAACTTAAGCATATCAATAAG 600
Query 601  CGGAGGA 607
Sbjct 601  |||||
CGGAGGA 607

```

>gb|EU568977.1| Pichia guilliermondii isolate CNRMA 200500809 18S ribosomal RNA gene, partial sequence; internal transcribed spacer 1, 5.8S ribosomal RNA gene, and internal transcribed spacer 2, complete sequence; and 28S ribosomal RNA gene, partial sequence  
Length=607

Score = 1116 bits (604), Expect = 0.0  
Identities = 606/607 (99%), Gaps = 0/607 (0%)  
Strand=Plus/Plus

```

Query 1 TCCGTAGGTGAACCTGCGGAAGGATCATTACAGTATTCTTTTGCCAGCGCTTAACTGCGC 60
Sbjct 1 |||||
TCCGTAGGTGAACCTGCGGAAGGATCATTACAGTATTCTTTTGCCAGCGCTTAACTGCGC 60
Query 61 GGCGAAAAACCTTACACACAGTGTCTTTTGGATAACAGAACTCTTGCTTTGGTTTGGCCTA 120
Sbjct 61 |||||
GGCGAAAAACCTTACACACAGTGTCTTTTGGATAACAGAACTCTTGCTTTGGTTTGGCCTA 120
Query 121 GAGATAGGTTGGGCCAGAGGTTTAACAAAACACAATTTAATTATTTTACAGTTAGTCAA 180
Sbjct 121 |||||
GAGATAGGTTGGGCCAGAGGTTTAACAAAACACAATTTAATTATTTTACAGTTAGTCAA 180
Query 181 ATTTTGAATTAATCTTCAAACCTTTCAACAACGGATCTCTTGGTTCTCGCATCGATGAAG 240
Sbjct 181 |||||
ATTTTGAATTAATCTTCAAACCTTTCAACAACGGATCTCTTGGTTCTCGCATCGATGAAG 240
Query 241 AACGCAGCGAAATGCGATAAGTAATATGAATTGCAGATTTTCGTGAATCATCGAATCTTT 300
Sbjct 241 |||||
AACGCAGCGAAATGCGATAAGTAATATGAATTGCAGATTTTCGTGAATCATCGAATCTTT 300
Query 301 GAACGCACATTGCGCCCTCTGGTATTCCAGAGGGCATGCCTGTTTGAGCGTCATTTCTCT 360
Sbjct 301 |||||
GAACGCACATTGCGCCCTCTGGTATTCCAGAGGGCATGCCTGTTTGAGCGTCATTTCTCT 360
Query 361 CTCAAACCCCCGGGTTTGGTATTGAGTGATACTCTTAGTCGGACTAGGCGTTTGCTTGAA 420
Sbjct 361 |||||
CTCAAACCCCCGGGTTTGGTATTGAGTGATACTCTTAGTCGGACTAGGCGTTTGCTTGAA 420

```

```

Sbjct 361 CTCAAACCCCCGGGTTTGGTATTGAGTGATACTCTTAGTCGGACTAGGCGTTTGCTTGAA 420
Query 421 AAGTATTGGCATGGGTAGTACTAGATAGTGCTGTTCGACCTCTCAATGTATTAGGTTTATC 480
      |||
Sbjct 421 AAGTATTGGCATGGGTAGTACTGGATAGTGCTGTTCGACCTCTCAATGTATTAGGTTTATC 480
Query 481 CAACTCGTTGAATGGTGTGGCGGGATATTTCTGGTATTGTTGGCCCGGCCTTACAACAAC 540
      |||
Sbjct 481 CAACTCGTTGAATGGTGTGGCGGGATATTTCTGGTATTGTTGGCCCGGCCTTACAACAAC 540
Query 541 CAAACAAGTTTGACCTCAAATCAGGTAGGAATACCCGCTGAACTTAAGCATATCAATAAG 600
      |||
Sbjct 541 CAAACAAGTTTGACCTCAAATCAGGTAGGAATACCCGCTGAACTTAAGCATATCAATAAG 600
Query 601 CGGAGGA 607
      |||
Sbjct 601 CGGAGGA 607

```

>gb|EU568975.1| Pichia guilliermondii isolate CNRMA 200500821 18S ribosomal RNA gene, partial sequence; internal transcribed spacer 1, 5.8S ribosomal RNA gene, and internal transcribed spacer 2, complete sequence; and 28S ribosomal RNA gene, partial sequence  
Length=607

Score = 1116 bits (604), Expect = 0.0  
Identities = 606/607 (99%), Gaps = 0/607 (0%)  
Strand=Plus/Plus

```

Query 1 TCCGTAGGTGAACCTGCGGAAGGATCATTACAGTATTCTTTTGCCAGCGCTTAACTGCGC 60
      |||
Sbjct 1 TCCGTAGGTGAACCTGCGGAAGGATCATTACAGTATTCTTTTGCCAGCGCTTAACTGCGC 60
Query 61 GGCGAAAAACCTTACACACAGTGTCTTTTGGTACAGAACTCTTGCTTTGGTTTGGCCTA 120
      |||
Sbjct 61 GGCGAAAAACCTTACACACAGTGTCTTTTGGTACAGAACTCTTGCTTTGGTTTGGCCTA 120
Query 121 GAGATAGGTTGGGCCAGAGGTTTAAACAAAACACAATTTAATTATTTTACAGTTAGTCAA 180
      |||
Sbjct 121 GAGATAGGTTGGGCCAGAGGTTTAAACAAAACACAATTTAATTATTTTACAGTTAGTCAA 180
Query 181 ATTTTGAATTAATCTTCAAACCTTTCAACAACGGATCTCTTGGTTCTCGCATCGATGAAG 240
      |||
Sbjct 181 ATTTTGAATTAATCTTCAAACCTTTCAACAACGGATCTCTTGGTTCTCGCATCGATGAAG 240
Query 241 AACGCAGCGAAATGCGATAAGTAATATGAATTGCAGATTTTCGTGAATCATCGAATCTTT 300
      |||
Sbjct 241 AACGCAGCGAAATGCGATAAGTAATATGAATTGCAGATTTTCGTGAATCATCGAATCTTT 300
Query 301 GAACGCACATTGCGCCCTCTGGTATTCCAGAGGGCATGCCTGTTTGAGCGTCATTTCTCT 360
      |||
Sbjct 301 GAACGCACATTGCGCCCTCTGGTATTCCAGAGGGCATGCCTGTTTGAGCGTCATTTCTCT 360
Query 361 CTCAAACCCCCGGGTTTGGTATTGAGTGATACTCTTAGTCGGACTAGGCGTTTGCTTGAA 420
      |||
Sbjct 361 CTCAAACCCCCGGGTTTGGTATTGAGTGATACTCTTAGTCGGACTAGGCGTTTGCTTGAA 420
Query 421 AAGTATTGGCATGGGTAGTACTAGATAGTGCTGTTCGACCTCTCAATGTATTAGGTTTATC 480
      |||
Sbjct 421 AAGTATTGGCATGGGTAGTACTGGATAGTGCTGTTCGACCTCTCAATGTATTAGGTTTATC 480
Query 481 CAACTCGTTGAATGGTGTGGCGGGATATTTCTGGTATTGTTGGCCCGGCCTTACAACAAC 540
      |||
Sbjct 481 CAACTCGTTGAATGGTGTGGCGGGATATTTCTGGTATTGTTGGCCCGGCCTTACAACAAC 540

```

```

Query 541 CAAACAAGTTTGGACCTCAAATCAGGTAGGAATACCCGCTGAACTTAAGCATATCAATAAG 600
          ||||||||||||||||||||||||||||||||||||||||||||||||||||||||||||
Sbjct 541 CAAACAAGTTTGGACCTCAAATCAGGTAGGAATACCCGCTGAACTTAAGCATATCAATAAG 600

Query 601 CGGAGGA 607
          |||||||
Sbjct 601 CGGAGGA 607

```

>gb|EU568973.1| Pichia guilliermondii isolate CNRMA 200500863 18S ribosomal RNA gene, partial sequence; internal transcribed spacer 1, 5.8S ribosomal RNA gene, and internal transcribed spacer 2, complete sequence; and 28S ribosomal RNA gene, partial sequence  
Length=607

Score = 1116 bits (604), Expect = 0.0  
Identities = 606/607 (99%), Gaps = 0/607 (0%)  
Strand=Plus/Plus

```

Query 1 TCCGTAGGTGAACCTGCGGAAGGATCATTACAGTATTCTTTTGCCAGCGCTTAACTGCGC 60
          ||||||||||||||||||||||||||||||||||||||||||||||||||||||||||||
Sbjct 1 TCCGTAGGTGAACCTGCGGAAGGATCATTACAGTATTCTTTTGCCAGCGCTTAACTGCGC 60

Query 61 GGCGAAAAACCTTACACACAGTGTCTTTTGGATAACAGAACTCTTGCTTTGGTTTGGCCTA 120
          ||||||||||||||||||||||||||||||||||||||||||||||||||||||||||||
Sbjct 61 GGCGAAAAACCTTACACACAGTGTCTTTTGGATAACAGAACTCTTGCTTTGGTTTGGCCTA 120

Query 121 GAGATAGGTTGGGCCAGAGGTTTAAACAAAAACAAATTTAATTATTTTACAGTTAGTCAA 180
          ||||||||||||||||||||||||||||||||||||||||||||||||||||||||||||
Sbjct 121 GAGATAGGTTGGGCCAGAGGTTTAAACAAAAACAAATTTAATTATTTTACAGTTAGTCAA 180

Query 181 ATTTTGAATTAATCTTCAAACCTTTCAACAACGGATCTCTTGGTTCTCGCATCGATGAAG 240
          ||||||||||||||||||||||||||||||||||||||||||||||||||||||||||||
Sbjct 181 ATTTTGAATTAATCTTCAAACCTTTCAACAACGGATCTCTTGGTTCTCGCATCGATGAAG 240

Query 241 AACGCAGCGAAATGCGATAAGTAATATGAATTGCAGATTTTCGTGAATCATCGAATCTTT 300
          ||||||||||||||||||||||||||||||||||||||||||||||||||||||||||||
Sbjct 241 AACGCAGCGAAATGCGATAAGTAATATGAATTGCAGATTTTCGTGAATCATCGAATCTTT 300

Query 301 GAACGCACATTGCGCCCTCTGGTATTCCAGAGGGCATGCCTGTTTGAGCGTCATTTCTCT 360
          ||||||||||||||||||||||||||||||||||||||||||||||||||||||||||||
Sbjct 301 GAACGCACATTGCGCCCTCTGGTATTCCAGAGGGCATGCCTGTTTGAGCGTCATTTCTCT 360

Query 361 CTCAAACCCCCGGGTTTGGTATTGAGTGATACTCTTAGTCGGACTAGGCGTTTGCTTGAA 420
          ||||||||||||||||||||||||||||||||||||||||||||||||||||||||||||
Sbjct 361 CTCAAACCCCCGGGTTTGGTATTGAGTGATACTCTTAGTCGGACTAGGCGTTTGCTTGAA 420

Query 421 AAGTATTGGCATGGGTAGTACTAGATAGTGCTGTGACCTCTCAATGTATTAGGTTTATC 480
          ||||||||||||||||||||||||||||||||||||||||||||||||||||||||||||
Sbjct 421 AAGTATTGGCATGGGTAGTACTGGATAGTGCTGTGACCTCTCAATGTATTAGGTTTATC 480

Query 481 CAACTCGTTGAATGGTGTGGCGGGATATTTCTGGTATTGTTGGCCCGGCCTTACAACAAC 540
          ||||||||||||||||||||||||||||||||||||||||||||||||||||||||||||
Sbjct 481 CAACTCGTTGAATGGTGTGGCGGGATATTTCTGGTATTGTTGGCCCGGCCTTACAACAAC 540

Query 541 CAAACAAGTTTGGACCTCAAATCAGGTAGGAATACCCGCTGAACTTAAGCATATCAATAAG 600
          ||||||||||||||||||||||||||||||||||||||||||||||||||||||||||||
Sbjct 541 CAAACAAGTTTGGACCTCAAATCAGGTAGGAATACCCGCTGAACTTAAGCATATCAATAAG 600

Query 601 CGGAGGA 607
          |||||||
Sbjct 601 CGGAGGA 607

```

>gb|EU568971.1| Pichia guilliermondii isolate CNRMA 200500864 18S ribosomal RNA gene, partial sequence; internal transcribed spacer 1, 5.8S ribosomal RNA gene, and internal transcribed spacer 2, complete sequence; and 28S ribosomal RNA gene, partial sequence  
Length=607

Score = 1116 bits (604), Expect = 0.0  
Identities = 606/607 (99%), Gaps = 0/607 (0%)  
Strand=Plus/Plus

```
Query 1 TCCGTAGGTGAACCTGCGGAAGGATCATTACAGTATTCTTTTGCCAGCGCTTAACTGCGC 60
      |||
Sbjct 1 TCCGTAGGTGAACCTGCGGAAGGATCATTACAGTATTCTTTTGCCAGCGCTTAACTGCGC 60

Query 61 GGCGAAAAACCTTACACACAGTGTCTTTTGATAACAGAACTCTTGCTTTGGTTTGGCCTA 120
      |||
Sbjct 61 GGCGAAAAACCTTACACACAGTGTCTTTTGATAACAGAACTCTTGCTTTGGTTTGGCCTA 120

Query 121 GAGATAGGTTGGGCCAGAGGTTTAAACAAAACACAATTTAATTATTTTACAGTTAGTCAA 180
      |||
Sbjct 121 GAGATAGGTTGGGCCAGAGGTTTAAACAAAACACAATTTAATTATTTTACAGTTAGTCAA 180

Query 181 ATTTTGAATTAATCTTCAAACCTTTCAACAACGGATCTCTTGGTTCTCGCATCGATGAAG 240
      |||
Sbjct 181 ATTTTGAATTAATCTTCAAACCTTTCAACAACGGATCTCTTGGTTCTCGCATCGATGAAG 240

Query 241 AACGCAGCGAAATGCGATAAGTAATATGAATTGCAGATTTTCGTGAATCATCGAATCTTT 300
      |||
Sbjct 241 AACGCAGCGAAATGCGATAAGTAATATGAATTGCAGATTTTCGTGAATCATCGAATCTTT 300

Query 301 GAACGCACATTGCGCCCTCTGGTATTCCAGAGGGCATGCCTGTTTGAGCGTCATTTCTCT 360
      |||
Sbjct 301 GAACGCACATTGCGCCCTCTGGTATTCCAGAGGGCATGCCTGTTTGAGCGTCATTTCTCT 360

Query 361 CTCAAACCCCCGGGTTTGGTATTGAGTGATACTCTTAGTCGGACTAGGCGTTTGCTTGAA 420
      |||
Sbjct 361 CTCAAACCCCCGGGTTTGGTATTGAGTGATACTCTTAGTCGGACTAGGCGTTTGCTTGAA 420

Query 421 AAGTATTGGCATGGGTAGTACTAGATAGTGCTGTGACCTCTCAATGTATTAGGTTTATC 480
      |||
Sbjct 421 AAGTATTGGCATGGGTAGTACTAGATAGTGCTGTGACCTCTCAATGTATTAGGTTTATC 480

Query 481 CAACTCGTTGAATGGTGTGGCGGGATATTTCTGGTATTGTTGGCCCGGCCTTACAACAAC 540
      |||
Sbjct 481 CAACTCGTTGAATGGTGTGGCGGGATATTTCTGGTATTGTTGGCCCGGCCTTACAACAAC 540

Query 541 CAAACAAGTTTGACCTCAAATCAGGTAGGAATACCCGCTGAACTTAAGCATATCAATAAG 600
      |||
Sbjct 541 CAAACAAGTTTGACCTCAAATCAGGTAGGAATACCCGCTGAACTTAAGCATATCAATAAG 600

Query 601 CGGAGGA 607
      |||
Sbjct 601 CGGAGGA 607
```

>gb|DQ663480.1| Pichia guilliermondii isolate hn-3 18S ribosomal RNA gene, partial sequence; internal transcribed spacer 1, 5.8S ribosomal RNA gene, and internal transcribed spacer 2, complete sequence; and 28S ribosomal RNA gene, partial sequence  
Length=610

Score = 1116 bits (604), Expect = 0.0  
Identities = 607/608 (99%), Gaps = 1/608 (0%)



Strand=Plus/Plus

```
Query 1 TCC-GTAGGTGAACCTGCGGAAGGATCATTACAGTATTCTTTTGCCAGCGCTTAACTGCG 59
      ||| |||||||||||||||||||||||||||||||||||||||||||||||||||||||
Sbjct 3 TCCTGTAGGTGAACCTGCGGAAGGATCATTACAGTATTCTTTTGCCAGCGCTTAACTGCG 62

Query 60 CGGCGAAAAACCTTACACACAGTGTCTTTTGGATAACAGAACTCTTGCTTTGGTTTGGCCT 119
      |||||||||||||||||||||||||||||||||||||||||||||||||||||||
Sbjct 63 CGGCGAAAAACCTTACACACAGTGTCTTTTGGATAACAGAACTCTTGCTTTGGTTTGGCCT 122

Query 120 AGAGATAGGTTGGGCCAGAGGTTTAAACAAAACACAATTTAATTATTTTACAGTTAGTCA 179
      |||||||||||||||||||||||||||||||||||||||||||||||||||||||
Sbjct 123 AGAGATAGGTTGGGCCAGAGGTTTAAACAAAACACAATTTAATTATTTTACAGTTAGTCA 182

Query 180 AATTTTGAATTAATCTTCAAACCTTTCAACAACGGATCTCTTGGTTCTCGCATCGATGAA 239
      |||||||||||||||||||||||||||||||||||||||||||||||||||||||
Sbjct 183 AATTTTGAATTAATCTTCAAACCTTTCAACAACGGATCTCTTGGTTCTCGCATCGATGAA 242

Query 240 GAACGCAGCGAAATGCGATAAGTAATATGAATTGCAGATTTTCGTGAATCATCGAATCTT 299
      |||||||||||||||||||||||||||||||||||||||||||||||||||||||
Sbjct 243 GAACGCAGCGAAATGCGATAAGTAATATGAATTGCAGATTTTCGTGAATCATCGAATCTT 302

Query 300 TGAACGCACATTGCGCCCTCTGGTATTCCAGAGGGCATGCCTGTTTGAGCGTCATTTCTC 359
      |||||||||||||||||||||||||||||||||||||||||||||||||||||||
Sbjct 303 TGAACGCACATTGCGCCCTCTGGTATTCCAGAGGGCATGCCTGTTTGAGCGTCATTTCTC 362

Query 360 TCTCAAACCCCCGGGTTTGGTATTGAGTGATACTCTTAGTCGGACTAGGCGTTTGCTTGA 419
      |||||||||||||||||||||||||||||||||||||||||||||||||||||||
Sbjct 363 TCTCAAACCCCCGGGTTTGGTATTGAGTGATACTCTTAGTCGGACTAGGCGTTTGCTTGA 422

Query 420 AAAGTATTGGCATGGGTAGTACTAGATAGTGCTGTCGACCTCTCAATGTATTAGGTTTAT 479
      |||||||||||||||||||||||||||||||||||||||||||||||||||||||
Sbjct 423 AAAGTATTGGCATGGGTAGTACTAGATAGTGCTGTCGACCTCTCAATGTATTAGGTTTAT 482

Query 480 CCAACTCGTTGAATGGTGTGGCGGGATATTTCTGGTATTGTTGGCCCGGCCTTACAACAA 539
      |||||||||||||||||||||||||||||||||||||||||||||||||||||||
Sbjct 483 CCAACTCGTTGAATGGTGTGGCGGGATATTTCTGGTATTGTTGGCCCGGCCTTACAACAA 542

Query 540 CCAAACAAGTTTGACCTCAAATCAGGTAGGAATACCCGCTGAACTTAAGCATATCAATAA 599
      |||||||||||||||||||||||||||||||||||||||||||||||||||||||
Sbjct 543 CCAAACAAGTTTGACCTCAAATCAGGTAGGAATACCCGCTGAACTTAAGCATATCAATAA 602

Query 600 GCGGAGGA 607
      |||||||
Sbjct 603 GCGGAGGA 610
```

>gb|DQ663479.1| Pichia guilliermondii isolate hn-2 18S ribosomal RNA gene, partial sequence; internal transcribed spacer 1, 5.8S ribosomal RNA gene, and internal transcribed spacer 2, complete sequence; and 28S ribosomal RNA gene, partial sequence  
Length=611

Score = 1116 bits (604), Expect = 0.0  
Identities = 607/608 (99%), Gaps = 1/608 (0%)  
Strand=Plus/Plus

```
Query 1 TCC-GTAGGTGAACCTGCGGAAGGATCATTACAGTATTCTTTTGCCAGCGCTTAACTGCG 59
      ||| |||||||||||||||||||||||||||||||||||||||||||||||||||||||
Sbjct 3 TCCTGTAGGTGAACCTGCGGAAGGATCATTACAGTATTCTTTTGCCAGCGCTTAACTGCG 62

Query 60 CGGCGAAAAACCTTACACACAGTGTCTTTTGGATAACAGAACTCTTGCTTTGGTTTGGCCT 119
      |||||||||||||||||||||||||||||||||||||||||||||||||||||||
Sbjct 63 CGGCGAAAAACCTTACACACAGTGTCTTTTGGATAACAGAACTCTTGCTTTGGTTTGGCCT 122
```

```

Query 120 AGAGATAGGTTGGGCCAGAGGTTTAAACAAAACACAATTTAATTATTTTACAGTTAGTCA 179
          |||
Sbjct 123 AGAGATAGGTTGGGCCAGAGGTTTAAACAAAACACAATTTAATTATTTTACAGTTAGTCA 182

Query 180 AATTTTGAATTAATCTTCAAAACTTTCAACAACGGATCTCTTGGTTCTCGCATCGATGAA 239
          |||
Sbjct 183 AATTTTGAATTAATCTTCAAAACTTTCAACAACGGATCTCTTGGTTCTCGCATCGATGAA 242

Query 240 GAACGCAGCGAAATGCGATAAGTAATATGAATTGCAGATTTTTCGTGAATCATCGAATCTT 299
          |||
Sbjct 243 GAACGCAGCGAAATGCGATAAGTAATATGAATTGCAGATTTTTCGTGAATCATCGAATCTT 302

Query 300 TGAACGCACATTGCGCCCTCTGGTATTCCAGAGGGCATGCCTGTTTGAGCGTCATTTCTC 359
          |||
Sbjct 303 TGAACGCACATTGCGCCCTCTGGTATTCCAGAGGGCATGCCTGTTTGAGCGTCATTTCTC 362

Query 360 TCTCAAACCCCCGGGTTTGGTATTGAGTGATACTCTTAGTCGGACTAGGCGTTTGCTTGA 419
          |||
Sbjct 363 TCTCAAACCCCCGGGTTTGGTATTGAGTGATACTCTTAGTCGGACTAGGCGTTTGCTTGA 422

Query 420 AAAGTATTGGCATGGGTAGTACTAGATAGTGCTGTCGACCTCTCAATGTATTAGGTTTAT 479
          |||
Sbjct 423 AAAGTATTGGCATGGGTAGTACTAGATAGTGCTGTCGACCTCTCAATGTATTAGGTTTAT 482

Query 480 CCAACTCGTTGAATGGTGTGGCGGGATATTTCTGGTATTGTTGGCCCGGCCTTACAACAA 539
          |||
Sbjct 483 CCAACTCGTTGAATGGTGTGGCGGGATATTTCTGGTATTGTTGGCCCGGCCTTACAACAA 542

Query 540 CCAAACAAGTTTGACCTCAAATCAGGTAGGAATACCCGCTGAACTTAAGCATATCAATAA 599
          |||
Sbjct 543 CCAAACAAGTTTGACCTCAAATCAGGTAGGAATACCCGCTGAACTTAAGCATATCAATAA 602

Query 600 GCGGAGGA 607
          |||
Sbjct 603 GCGGAGGA 610

```

>gb|GQ913349.1| *Pichia guilliermondii* strain W1171 18S ribosomal RNA gene, partial sequence; internal transcribed spacer 1, 5.8S ribosomal RNA gene, and internal transcribed spacer 2, complete sequence; and 28S ribosomal RNA gene, partial sequence  
Length=607

Score = 1110 bits (601), Expect = 0.0  
Identities = 605/607 (99%), Gaps = 0/607 (0%)  
Strand=Plus/Plus

```

Query 1 TCCGTAGGTGAACCTGCGGAAGGATCATTACAGTATTCTTTTGCCAGCGCTTAACTGCGC 60
          |||
Sbjct 1 TCCGTAGGTGAACCTGCGGAAGGATCATTACAGTATTCTTTTGCCAGCGCTTAACTGCGC 60

Query 61 GGCGAAAAACCTTACACACAGTGTCTTTTGTACAGAACTCTTGCTTTGGTTTGGCCTA 120
          |||
Sbjct 61 GGCGAAAAACCTTACACACAGTGTCTTTTGTACAGAACTCTTGCTTTGGTTTGGCCTA 120

Query 121 GAGATAGGTTGGGCCAGAGGTTTAAACAAAACACAATTTAATTATTTTACAGTTAGTCAA 180
          |||
Sbjct 121 GAGATAGGTTGGGCCAGAGGTTTAAACAAAACACAATTTAATTATTTTACAGTTAGTCAA 180

Query 181 AATTTTGAATTAATCTTCAAAACTTTCAACAACGGATCTCTTGGTTCTCGCATCGATGAAG 240
          |||
Sbjct 181 AATTTTGAATTAATCTTCAAAACTTTCAACAACGGATCTCTTGGTTCTCGCATCGATGAAG 240

```

```

Query 241 AACGCAGCGAAATGCGATAAGTAATATGAATTGCAGATTTTCGTGAATCATCGAATCTTT 300
          |||
Sbjct 241 AACGCAGCGAAATGCGATAAGTAATATGAATTGCAGATTTTCGTGAATCATCGAATCTTT 300

Query 301 GAACGCACATTGCGCCCTCTGGTATTCCAGAGGGCATGCCTGTTTGAGCGTCATTTCTCT 360
          |||
Sbjct 301 GAACGCACATTGCGCCCTCTGGTATTCCAGAGGGCATGCCTGTTTGAGCGTCATTTCTCT 360

Query 361 CTCAAACCCCCGGGTTTGGTATTGAGTGATACTCTTAGTCGGACTAGGCGTTTGCTTGAA 420
          |||
Sbjct 361 CTCAAACCCCCGGGTTTGGTATTGAGTGATACTCTTAGTCGGACTAGGCGTTTGCTTGAG 420

Query 421 AAGTATTGGCATGGGTAGTACTAGATAGTGCTGTTCGACCTCTCAATGTATTAGGTTTATC 480
          |||
Sbjct 421 AAGTATTGGCATGGGTAGTACTGGATAGTGCTGTTCGACCTCTCAATGTATTAGGTTTATC 480

Query 481 CAACTCGTTGAATGGTGTGGCGGGATATTTCTGGTATTGTTGGCCCGGCCTTACAACAAC 540
          |||
Sbjct 481 CAACTCGTTGAATGGTGTGGCGGGATATTTCTGGTATTGTTGGCCCGGCCTTACAACAAC 540

Query 541 CAAACAAGTTTGACCTCAAATCAGGTAGGAATACCCGCTGAACTTAAGCATATCAATAAG 600
          |||
Sbjct 541 CAAACAAGTTTGACCTCAAATCAGGTAGGAATACCCGCTGAACTTAAGCATATCAATAAG 600

Query 601 CGGAGGA 607
          |||
Sbjct 601 CGGAGGA 607

```

>gb|GQ497898.1| Pichia guilliermondii strain PX-PAT 18S ribosomal RNA gene, partial sequence; internal transcribed spacer 1, 5.8S ribosomal RNA gene, and internal transcribed spacer 2, complete sequence; and 28S ribosomal RNA gene, partial sequence  
Length=607

Score = 1110 bits (601), Expect = 0.0  
Identities = 605/607 (99%), Gaps = 0/607 (0%)  
Strand=Plus/Plus

```

Query 1 TCCGTAGGTGAACCTGCGGAAGGATCATTACAGTATTCTTTTGCCAGCGCTTAACTGCGC 60
          |||
Sbjct 1 TCCGTAGGTGAACCTGCGGAAGGATCATTACAGTATTCTTTTGCCAGCGCTTAACTGCGC 60

Query 61 GGCGAAAAACCTTACACACAGTGTCTTTTGATACAGAACTCTTGCTTTGGTTTGGCCTA 120
          |||
Sbjct 61 GGCGAAAAACCTTACACACAGTGTCTTTTGATACAGAACTCTTGCTTTGGTTTGGCCTA 120

Query 121 GAGATAGGTTGGGCCAGAGGTTTAACAAAACACAATTTAATTATTTTACAGTTAGTCAA 180
          |||
Sbjct 121 GAGATAGGTTGGGCCAGAGGTTTAACAAAACACAATTTAATTATTTTACAGTTAGTCAA 180

Query 181 ATTTTGAATTAATCTTCAAACCTTTCAACAACGGATCTCTTGGTTCTCGCATCGATGAAG 240
          |||
Sbjct 181 ATTTTGAATTAATCTTCAAACCTTTCAACAACGGATCTCTTGGTTCTCGCATCGATGAAG 240

Query 241 AACGCAGCGAAATGCGATAAGTAATATGAATTGCAGATTTTCGTGAATCATCGAATCTTT 300
          |||
Sbjct 241 AACGCAGCGAAATGCGATAAGTAATATGAATTGCAGATTTTCGTGAATCATCGAATCTTT 300

Query 301 GAACGCACATTGCGCCCTCTGGTATTCCAGAGGGCATGCCTGTTTGAGCGTCATTTCTCT 360
          |||
Sbjct 301 GAACGCACATTGCGCCCTCTGGTATTCCAGAGGGCATGCCTGTTTGAGCGTCATTTCTCT 360

Query 361 CTCAAACCCCCGGGTTTGGTATTGAGTGATACTCTTAGTCGGACTAGGCGTTTGCTTGAA 420

```

```

Sbjct 361  |||||CTCAAACCCCCGGGTTTGGTATTGAGTGATACTCTTAGTCGGACTAGGCGTTTGCTTGAA 420
Query 421  AAGTATTGGCATGGGTAGTACTAGATAGTGCTGTTCGACCTCTCAATGTATTAGGTTTATC 480
Sbjct 421  |||||AAGTATTGGCATGGGTAGTACTAGATAGTGCTGTTCGACCTCTCAATGTATTAGGTTTATC 480
Query 481  CAACTCGTTGAATGGTGTGGCGGGATATTTCTGGTATTGTTGGCCCGCCTTACAACAAC 540
Sbjct 481  |||||CAACTCGTTGAATGGTGTGGCGGGATATTTCTGGTATTGTTGGCCCGCCTTACAACAAC 540
Query 541  CAAACAAGTTTGACCTCAAATCAGGTAGGAATACCCGCTGAACTTAAGCATATCAATAAG 600
Sbjct 541  |||||CAAACAAGTTTGACCTCAAATCAGGTAGGAATACCCGCTGAACTTAAGCATATCAATAAG 600
Query 601  CGGAGGA 607
Sbjct 601  |||||CGGAGGA 607

```

>gb|GQ149493.1| Pichia guilliermondii strain UAF-130 18S ribosomal RNA gene, partial sequence; internal transcribed spacer 1, 5.8S ribosomal RNA gene, and internal transcribed spacer 2, complete sequence; and 28S ribosomal RNA gene, partial sequence  
Length=607

Score = 1110 bits (601), Expect = 0.0  
Identities = 605/607 (99%), Gaps = 0/607 (0%)  
Strand=Plus/Plus

```

Query 1 TCCGTAGGTGAACCTGCGGAAGGATCATTACAGTATTCTTTTGCCAGCGCTTAACTGCGC 60
Sbjct 1 TCCGTAGGTGAACCTGCGGAAGGATCATTACAGTATTCTTTTGCCAGCGCTTAACTGCGC 60
Query 61 GGCGAAAAACCTTACACACAGTGTCTTTTGGATACAGAACTCTTGCTTTGGTTTGGCCTA 120
Sbjct 61 GGCGAAAAACCTTACACACAGTGTCTTTTGGATACAGAACTCTTGCTTTGGTTTGGCCTA 120
Query 121 GAGATAGGTTGGGCCAGAGGTTTAACAAAACACAATTTAATTATTTTACAGTTAGTCAA 180
Sbjct 121 GAGATAGGTTGGGCCAGAGGTTTAACAAAACACAATTTAATTATTTTACAGTTAGTCAA 180
Query 181 ATTTTGAATTAATCTTCAAACCTTTCAACAACGGATCTCTTGGTTCTCGCATCGATGAAG 240
Sbjct 181 ATTTTGAATTAATCTTCAAACCTTTCAACAACGGATCTCTTGGTTCTCGCATCGATGAAG 240
Query 241 AACGCAGCGAAATGCGATAAGTAATATGAATTGCAGATTTTCGTGAATCATCGAATCTTT 300
Sbjct 241 AACGCAGCGAAATGCGATAAGTAATATGAATTGCAGATTTTCGTGAATCATCGAATCTTT 300
Query 301 GAACGCACATTGCGCCCTCTGGTATTCCAGAGGGCATGCCTGTTTGAGCGTCATTTCTCT 360
Sbjct 301 GAACGCACATTGCGCCCTCTGGTATTCCAGAGGGCATGCCTGTTTGAGCGTCATTTCTCT 360
Query 361 CTCAAACCCCCGGGTTTGGTATTGAGTGATACTCTTAGTCGGACTAGGCGTTTGCTTGAA 420
Sbjct 361 CTCAAACCCCCGGGTTTGGTATTGAGTGATACTCTTAGTCGGACTAGGCGTTTGCTTGAA 420
Query 421 AAGTATTGGCATGGGTAGTACTAGATAGTGCTGTTCGACCTCTCAATGTATTAGGTTTATC 480
Sbjct 421 AAGTATTGGCATGAGTAGTACTGGATAGTGCTGTTCGACCTCTCAATGTATTAGGTTTATC 480
Query 481 CAACTCGTTGAATGGTGTGGCGGGATATTTCTGGTATTGTTGGCCCGCCTTACAACAAC 540

```

```

Sbjct 481 CAACTCGTTGAATGGTGTGGCGGGATATTTCTGGTATTGTTGGCCCGCCTTACAACAAC 540
Query 541 CAAACAAGTTTGGACCTCAAATCAGGTAGGAATACCCGCTGAACTTAAGCATATCAATAAG 600
      |||
Sbjct 541 CAAACAAGTTTGGACCTCAAATCAGGTAGGAATACCCGCTGAACTTAAGCATATCAATAAG 600
Query 601 CGGAGGA 607
      |||
Sbjct 601 CGGAGGA 607

```

>gb|FJ662408.1| Pichia guilliermondii isolate ZA043 18S ribosomal RNA gene, partial sequence; internal transcribed spacer 1, 5.8S ribosomal RNA gene, and internal transcribed spacer 2, complete sequence; and 28S ribosomal RNA gene, partial sequence  
Length=616

Score = 1110 bits (601), Expect = 0.0  
Identities = 606/608 (99%), Gaps = 1/608 (0%)  
Strand=Plus/Plus

```

Query 1 TCCGTA-GGTGAACCTGCGGAAGGATCATTACAGTATTCTTTTGCCAGCGCTTAACTGCG 59
      |||
Sbjct 4 TCCGTAGGGTGAACCTGCGGAAGGATCATTACAGTATTCTTTTGCCAGCGCTTAACTGCG 63
Query 60 CGGCGAAAAACCTTACACACAGTGTCTTTTGGATACAGAACTCTTGCTTTGGTTTGGCCT 119
      |||
Sbjct 64 CGGCGAAAAACCTTACACACAGTGTCTTTTGGATACAGAACTCTTGCTTTGGTTTGGCCT 123
Query 120 AGAGATAGGTTGGGCCAGAGGTTTAAACAAAACACAATTTAATTATTTTACAGTTAGTCA 179
      |||
Sbjct 124 AGAGATAGGTTGGGCCAGAGGTTTAAACAAAACACAATTTAATTATTTTACAGTTAGTCA 183
Query 180 AATTTTGAATTAATCTTCAAACCTTTCAACAACGGATCTCTTGGTTCTCGCATCGATGAA 239
      |||
Sbjct 184 AATTTTGAATTAATCTTCAAACCTTTCAACAACGGATCTCTTGGTTCTCGCATCGATGAA 243
Query 240 GAACGCAGCGAAATGCGATAAGTAATATGAATTGCAGATTTTCGTGAATCATCGAATCTT 299
      |||
Sbjct 244 GAACGCAGCGAAATGCGATAAGTAATATGAATTGCAGATTTTCGTGAATCATCGAATCTT 303
Query 300 TGAACGCACATTGCGCCCTCTGGTATTCCAGAGGGCATGCCTGTTTGGCGTCATTTCTC 359
      |||
Sbjct 304 TGAACGCACATTGCGCCCTCTGGTATTCCAGAGGGCATGCCTGTTTGGCGTCATTTCTC 363
Query 360 TCTCAAACCCCGGGTTTGGTATTGAGTGATACTCTTAGTCGGACTAGGCGTTTGCCTGA 419
      |||
Sbjct 364 TCTCAAACCCCGGGTTTGGTATTGAGTGATACTCTTAGTCGGACTAGGCGTTTGCCTGA 423
Query 420 AAAGTATTGGCATGGGTAGTACTAGATAGTGCTGTCGACCTCTCAATGTATTAGGTTTAT 479
      |||
Sbjct 424 AAAGTATTGGCATGGGTAGTACTAGATAGTGCTGTCGACCTCTCAATGTATTAGGTTTAT 483
Query 480 CCAACTCGTTGAATGGTGTGGCGGGATATTTCTGGTATTGTTGGCCCGCCTTACAACAA 539
      |||
Sbjct 484 CCAACTCGTTGAATGGTGTGGCGGGATATTTCTGGTATTGTTGGCCCGCCTTACAACAA 543
Query 540 CCAACAAGTTTGGACCTCAAATCAGGTAGGAATACCCGCTGAACTTAAGCATATCAATAA 599
      |||
Sbjct 544 CCAACAAGTTTGGACCTCAAATCAGGTAGGAATACCCGCTGAACTTAAGCATATCAATAA 603
Query 600 GCGGAGGA 607
      |||
Sbjct 604 GCGGAGGA 611

```

>gb|EU568969.1| Pichia guilliermondii isolate CNRMA 200501202 18S ribosomal RNA gene, partial sequence; internal transcribed spacer 1, 5.8S ribosomal RNA gene, and internal transcribed spacer 2, complete sequence; and 28S ribosomal RNA gene, partial sequence  
Length=607

Score = 1110 bits (601), Expect = 0.0  
Identities = 605/607 (99%), Gaps = 0/607 (0%)  
Strand=Plus/Plus

```
Query 1 TCCGTAGGTGAACCTGCGGAAGGATCATTACAGTATTCTTTTGCCAGCGCTTAACTGCGC 60
      |||
Sbjct 1 TCCGTAGGTGAACCTGCGGAAGGATCATTACAGTATTCTTTTGCCAGCGCTTAACTGCGC 60

Query 61 GGCGAAAAACCTTACACACAGTGTCTTTTGATAACAGAACTCTTGCTTTGGTTTGGCCTA 120
      |||
Sbjct 61 GGCGAAAAACCTTACACACAGTGTCTTTTGATAACAGAACTCTTGCTTTGGTTTGGCCTA 120

Query 121 GAGATAGGTTGGGCCAGAGGTTTAAACAAAACACAATTTAATTATTTTACAGTTAGTCAA 180
      |||
Sbjct 121 GAGATAGGTTGGGCCAGAGGTTTAAACAAAACACAATTTAATTATTTTACAGTTAGTCAA 180

Query 181 ATTTTGAATTAATCTTCAAACCTTTCAACAACGGATCTCTTGGTTCTCGCATCGATGAAG 240
      |||
Sbjct 181 CTTTGAATTAATCTTCAAACCTTTCAACAACGGATCTCTTGGTTCTCGCATCGATGAAG 240

Query 241 AACGCAGCGAAATGCGATAAGTAATATGAATTGCAGATTTTCGTGAATCATCGAATCTTT 300
      |||
Sbjct 241 AACGCAGCGAAATGCGATAAGTAATATGAATTGCAGATTTTCGTGAATCATCGAATCTTT 300

Query 301 GAACGCACATTGCGCCCTCTGGTATTCCAGAGGGCATGCCTGTTTGAGCGTCATTTCTCT 360
      |||
Sbjct 301 GAACGCACATTGCGCCCTCTGGTATTCCAGAGGGCATGCCTGTTTGAGCGTCATTTCTCT 360

Query 361 CTCAAACCCCGGGTTTGGTATTGAGTGATACTCTTAGTCGGACTAGGCGTTTGCTTGAA 420
      |||
Sbjct 361 CTCAAACCCCGGGTTTGGTATTGAGTGATACTCTTAGTCGGACTAGGCGTTTGCTTGAA 420

Query 421 AAGTATTGGCATGGGTAGTACTAGATAGTGCTGTGACCTCTCAATGTATTAGGTTTATC 480
      |||
Sbjct 421 AAGTATTGGCATGGGTAGTACTAGATAGTGCTGTGACCTCTCAATGTATTAGGTTTATC 480

Query 481 CAACTCGTTGAATGGTGTGGCGGGATATTTCTGGTATTGTTGGCCCGGCCTTACAACAAC 540
      |||
Sbjct 481 CAACTCGTTGAATGGTGTGGCGGGATATTTCTGGTATTGTTGGCCCGGCCTTACAACAAC 540

Query 541 CAAACAAGTTTGACCTCAAATCAGGTAGGAATACCCGCTGAACTTAAGCATATCAATAAG 600
      |||
Sbjct 541 CAAACAAGTTTGACCTCAAATCAGGTAGGAATACCCGCTGAACTTAAGCATATCAATAAG 600

Query 601 CGGAGGA 607
      |||
Sbjct 601 CGGAGGA 607
```

>gb|AF209874.1|AF209874 Debaryomyces hansenii var. fabryi CBS8417 internal transcribed spacer 1, 5.8S ribosomal RNA gene, and internal transcribed spacer 2, complete sequence  
Length=607

Score = 1110 bits (601), Expect = 0.0







```

Query 301 GAACGCACATTGCGCCCTCTGGTATTCCAGAGGGCATGCCTGTTTGAGCGTCATTTCTCT 360
          |||
Sbjct 301 GAACGCACATTGCGCCCTCTGGTATTCCAGAGGGCATGCCTGTTTGAGCGTCATTTCTCT 360

Query 361 CTCAAACCCCCGGGTTTGGTATTGAGTGATACTCTTAGTCGGACTAGGCGTTTGCTTGAA 420
          |||
Sbjct 361 CTCAAACCCCCGGGTTTGGTATTGAGTGATACTCTTAGTCGGACTAGGCGTTTGCTTGAA 420

Query 421 AAGTATTGGCATGGGTAGTACTAGATAGTGCTGTCGACCTCTCAATGTATTAGGTTTATC 480
          |||
Sbjct 421 AAGTATTGGCATGGGTAGTACTAGATAGTGCTGTCGACCTCTCAATGTATTAGGTTTATC 480

Query 481 CAACTCGTTGAATGGTGTGGCGGGATATTTCTGGTATTGTTGGCCCGGCCTTACAACAAC 540
          |||
Sbjct 481 CAACTCGTTGAATGGTGTGGCGGGATATTTCTGGTATTGTTGGCCCGGCCTTACAACAAC 540

Query 541 CAAACAAGTTTGACCTCAAATCAGGTAGGAATACCCGCTGAACTTAAGCATATCAATAAG 600
          |||
Sbjct 541 CAAACAAGTTTGACCTCAAATCAGGTAGGAATACCCGCTGAACTTAAGCATATCAATAAG 600

Query 601 CGGAGGA 607
          |||
Sbjct 601 CGGAGGA 607

```

>gb|EF643576.1| *Pichia guilliermondii* strain S0201 18S ribosomal RNA gene, partial sequence; internal transcribed spacer 1, 5.8S ribosomal RNA gene, and internal transcribed spacer 2, complete sequence; and 28S ribosomal RNA gene, partial sequence  
Length=639

Score = 1107 bits (599), Expect = 0.0  
Identities = 599/599 (100%), Gaps = 0/599 (0%)  
Strand=Plus/Plus

```

Query 1 TCCGTAGGTGAACCTGCGGAAGGATCATTACAGTATTCTTTTGCCAGCGCTTAACTGCGC 60
          |||
Sbjct 28 TCCGTAGGTGAACCTGCGGAAGGATCATTACAGTATTCTTTTGCCAGCGCTTAACTGCGC 87

Query 61 GGCGAAAAACCTTACACACAGTGTCTTTTGGTACAGAACTCTTGCTTTGGTTTGGCCTA 120
          |||
Sbjct 88 GGCGAAAAACCTTACACACAGTGTCTTTTGGTACAGAACTCTTGCTTTGGTTTGGCCTA 147

Query 121 GAGATAGGTTGGGCCAGAGGTTTAACAAAACACAATTTAATTATTTTACAGTTAGTCAA 180
          |||
Sbjct 148 GAGATAGGTTGGGCCAGAGGTTTAACAAAACACAATTTAATTATTTTACAGTTAGTCAA 207

Query 181 ATTTTGAATTAATCTTCAAACCTTTCAACAACGGATCTCTTGGTTCTCGCATCGATGAAG 240
          |||
Sbjct 208 ATTTTGAATTAATCTTCAAACCTTTCAACAACGGATCTCTTGGTTCTCGCATCGATGAAG 267

Query 241 AACGCAGCGAAATGCGATAAGTAATATGAATTGCAGATTTTCGTGAATCATCGAATCTTT 300
          |||
Sbjct 268 AACGCAGCGAAATGCGATAAGTAATATGAATTGCAGATTTTCGTGAATCATCGAATCTTT 327

Query 301 GAACGCACATTGCGCCCTCTGGTATTCCAGAGGGCATGCCTGTTTGAGCGTCATTTCTCT 360
          |||
Sbjct 328 GAACGCACATTGCGCCCTCTGGTATTCCAGAGGGCATGCCTGTTTGAGCGTCATTTCTCT 387

Query 361 CTCAAACCCCCGGGTTTGGTATTGAGTGATACTCTTAGTCGGACTAGGCGTTTGCTTGAA 420
          |||
Sbjct 388 CTCAAACCCCCGGGTTTGGTATTGAGTGATACTCTTAGTCGGACTAGGCGTTTGCTTGAA 447

```

```

Query 421 AAGTATTGGCATGGGTAGTACTAGATAGTGCTGTCGACCTCTCAATGTATTAGGTTTATC 480
          |||
Sbjct 448 AAGTATTGGCATGGGTAGTACTAGATAGTGCTGTCGACCTCTCAATGTATTAGGTTTATC 507

Query 481 CAACTCGTTGAATGGTGTGGCGGGATATTTCTGGTATTGTTGGCCCGGCCTTACAACAAC 540
          |||
Sbjct 508 CAACTCGTTGAATGGTGTGGCGGGATATTTCTGGTATTGTTGGCCCGGCCTTACAACAAC 567

Query 541 CAAACAAGTTTGACCTCAAATCAGGTAGGAATACCCGCTGAACTTAAGCATATCAATAA 599
          |||
Sbjct 568 CAAACAAGTTTGACCTCAAATCAGGTAGGAATACCCGCTGAACTTAAGCATATCAATAA 626

```

>gb|EF222224.1| *Pichia guilliermondii* strain WC43-1 18S ribosomal RNA gene, partial sequence; internal transcribed spacer 1, 5.8S ribosomal RNA gene, and internal transcribed spacer 2, complete sequence; and 28S ribosomal RNA gene, partial sequence  
Length=636

Score = 1107 bits (599), Expect = 0.0  
Identities = 606/609 (99%), Gaps = 2/609 (0%)  
Strand=Plus/Plus

```

Query 1 TCCGTAGGTGAACCTGCGGAAGGATCATTACAGTATTCTTTTGCCAGCGCTTAACTGCGC 60
          |||
Sbjct 27 TCCGTAGGTGAACCTGCGGAAGGATCATTACAGTATTCTTTTGCCAGCGCTTAACTGCGC 86

Query 61 GGCGAAAAACCTTACACACAGTGTCTTTTGGATAACAGAACTCTTGCTTTGGTTTGGCCTA 120
          |||
Sbjct 87 GGCGAAAAACCTTACACACAGTGTCTTTTGGATAACAGAACTCTTGCTTTGGTTTGGCCTA 146

Query 121 GAGATAGGTTGGGCCAGAGGTTTAACAAAAACAAATTTAATTATTTTACAGTTAGTCAA 180
          |||
Sbjct 147 GAGATAGGTTGGGCCAGAGGTTTAACAAAAACAAATTTAATTATTTTACAGTTAGTCAA 206

Query 181 ATTTTGAATTAATCTTCAAACTTTCAACAACGGATCTCTTGGTTCTCGCATCGATGAAG 240
          |||
Sbjct 207 ATTTTGAATTAATCTTCAAACTTTCAACAACGGATCTCTTGGTTCTCGCATCGATGAAG 266

Query 241 AACGCAGCGAAATGCGATAAGTAATATGAATTGCAGATTTTCGTGAATCATCGAATCTTT 300
          |||
Sbjct 267 AACGCAGCGAAATGCGATAAGTAATATGAATTGCAGATTTTCGTGAATCATCGAATCTTT 326

Query 301 GAACGCACATTGCGCCCTCTGGTATTCCAGAGGGCATGCCTGTTTGAGCGTCATTTCTCT 360
          |||
Sbjct 327 GAACGCACATTGCGCCCTCTGGTATTCCAGAGGGCATGCCTGTTTGAGCGTCATTTCTCT 386

Query 361 CTCAAACCCCCGGGTTTGGTATTGAGTGATACTCTTAGTCGGACTAGGCGTTTGCTTGAA 420
          |||
Sbjct 387 CTCAAACCCCCGGGTTTGGTATTGAGTGATACTCTTAGTCGGACTAGGCGTTTGCTTGAA 446

Query 421 AAGTATTGGCATGGGTAGTACTAGATAGTGCTGTCGACCTCTCAATGTATTAGGTTTATC 480
          |||
Sbjct 447 AAGTATTGGCATGGGTAGTACTGGATAGTGCTGTCGACCTCTCAATGTATTAGGTTTATC 506

Query 481 CAACTCGTTGAATGGTGTGGCGGGATATTTCTGGTATTGTTGGCCCGGCCTTACAACAAC 540
          |||
Sbjct 507 CAACTCGTTGAATGGTGTGGCGGGATATTTCTGGTATTGTTGGCCCGGCCTTACAACAAC 566

Query 541 CAAACAAGTTTGACCTCAAATCAGGTAGGAATACCCGCTGAACTTAAGCATATCAATAAG 600
          |||
Sbjct 567 CAAACAAGTTTGACCTCAAATCAGGTAGGAATACCCGCTGAACTTAAGCATATCAATAAG 626

Query 601 -CGGA-GGA 607

```

Sbjct 627 |||| ||| GCGGAAGGA 635

>gb|EF375704.1| Pichia guilliermondii strain N12c 18S ribosomal RNA gene, partial sequence; internal transcribed spacer 1, 5.8S ribosomal RNA gene, and internal transcribed spacer 2, complete sequence; and 26S ribosomal RNA gene, partial sequence  
Length=628

Score = 1107 bits (599), Expect = 0.0  
Identities = 599/599 (100%), Gaps = 0/599 (0%)  
Strand=Plus/Plus

```
Query 1 TCCGTAGGTGAACCTGCGGAAGGATCATTACAGTATTCTTTTGCCAGCGCTTAACTGCGC 60
      |||
Sbjct 17 TCCGTAGGTGAACCTGCGGAAGGATCATTACAGTATTCTTTTGCCAGCGCTTAACTGCGC 76

Query 61 GGCGAAAAACCTTACACACAGTGTCTTTTGATACAGAACTCTTGCTTTGGTTTGGCCTA 120
      |||
Sbjct 77 GGCGAAAAACCTTACACACAGTGTCTTTTGATACAGAACTCTTGCTTTGGTTTGGCCTA 136

Query 121 GAGATAGGTTGGGCCAGAGGTTTAAACAAAACACAATTTAATTATTTTACAGTTAGTCAA 180
      |||
Sbjct 137 GAGATAGGTTGGGCCAGAGGTTTAAACAAAACACAATTTAATTATTTTACAGTTAGTCAA 196

Query 181 ATTTTGAATTAATCTTCAAACTTTCAACAACGGATCTCTTGGTTCTCGCATCGATGAAG 240
      |||
Sbjct 197 ATTTTGAATTAATCTTCAAACTTTCAACAACGGATCTCTTGGTTCTCGCATCGATGAAG 256

Query 241 AACGCAGCGAAATGCGATAAGTAATATGAATTGCAGATTTTCGTGAATCATCGAATCTTT 300
      |||
Sbjct 257 AACGCAGCGAAATGCGATAAGTAATATGAATTGCAGATTTTCGTGAATCATCGAATCTTT 316

Query 301 GAACGCACATTGCGCCCTCTGGTATTCCAGAGGGCATGCCTGTTTGAGCGTCATTTCTCT 360
      |||
Sbjct 317 GAACGCACATTGCGCCCTCTGGTATTCCAGAGGGCATGCCTGTTTGAGCGTCATTTCTCT 376

Query 361 CTCAAACCCCCGGGTTTGGTATTGAGTGATACTCTTAGTCGGACTAGGCGTTTGCTTGAA 420
      |||
Sbjct 377 CTCAAACCCCCGGGTTTGGTATTGAGTGATACTCTTAGTCGGACTAGGCGTTTGCTTGAA 436

Query 421 AAGTATTGGCATGGGTAGTACTAGATAGTGCTGTGACCTCTCAATGTATTAGGTTTATC 480
      |||
Sbjct 437 AAGTATTGGCATGGGTAGTACTAGATAGTGCTGTGACCTCTCAATGTATTAGGTTTATC 496

Query 481 CAACTCGTTGAATGGTGTGGCGGGATATTTCTGGTATTGTTGGCCCGGCCTTACAACAAC 540
      |||
Sbjct 497 CAACTCGTTGAATGGTGTGGCGGGATATTTCTGGTATTGTTGGCCCGGCCTTACAACAAC 556

Query 541 CAAACAAGTTTGACCTCAAATCAGGTAGGAATACCCGCTGAACTTAAGCATATCAATAA 599
      |||
Sbjct 557 CAAACAAGTTTGACCTCAAATCAGGTAGGAATACCCGCTGAACTTAAGCATATCAATAA 615
```

>gb|AY700139.1| Fungal endophyte sp. CEY 20 18S small subunit ribosomal RNA gene, partial sequence; internal transcribed spacer 1, 5.8S ribosomal RNA gene, and internal transcribed spacer 2, complete sequence; and 28S large subunit ribosomal RNA gene, partial sequence  
Length=608

Score = 1107 bits (599), Expect = 0.0  
Identities = 599/599 (100%), Gaps = 0/599 (0%)

Strand=Plus/Plus

```
Query 2 CCGTAGGTGAACCTGCGGAAGGATCATTACAGTATTCTTTTGCCAGCGCTTAACTGCGCG 61
      |||
Sbjct 1 CCGTAGGTGAACCTGCGGAAGGATCATTACAGTATTCTTTTGCCAGCGCTTAACTGCGCG 60

Query 62 GCGAAAAACCTTACACACAGTGTCTTTTGGATAACAGAACTCTTGCTTTGGTTTGGCCTAG 121
      |||
Sbjct 61 GCGAAAAACCTTACACACAGTGTCTTTTGGATAACAGAACTCTTGCTTTGGTTTGGCCTAG 120

Query 122 AGATAGGTTGGGCCAGAGGTTTAAACAAAACACAATTTAATTATTTTACAGTTAGTCAAA 181
      |||
Sbjct 121 AGATAGGTTGGGCCAGAGGTTTAAACAAAACACAATTTAATTATTTTACAGTTAGTCAAA 180

Query 182 TTTTGAATTAATCTTCAAACCTTCAACAACGGATCTCTTGGTTCTCGCATCGATGAAGA 241
      |||
Sbjct 181 TTTTGAATTAATCTTCAAACCTTCAACAACGGATCTCTTGGTTCTCGCATCGATGAAGA 240

Query 242 ACGCAGCGAAATGCGATAAGTAATATGAATTGCAGATTTTCGTGAATCATCGAATCTTTG 301
      |||
Sbjct 241 ACGCAGCGAAATGCGATAAGTAATATGAATTGCAGATTTTCGTGAATCATCGAATCTTTG 300

Query 302 AACGCACATTGCGCCCTCTGGTATTCCAGAGGGCATGCCTGTTGAGCGTCATTTCTCTC 361
      |||
Sbjct 301 AACGCACATTGCGCCCTCTGGTATTCCAGAGGGCATGCCTGTTGAGCGTCATTTCTCTC 360

Query 362 TCAAACCCCCGGGTTTGGTATTGAGTGATACTCTTAGTCGGACTAGGCGTTTGCTTGAAA 421
      |||
Sbjct 361 TCAAACCCCCGGGTTTGGTATTGAGTGATACTCTTAGTCGGACTAGGCGTTTGCTTGAAA 420

Query 422 AGTATTGGCATGGGTAGTACTAGATAGTGCTGTCGACCTCTCAATGTATTAGGTTTATCC 481
      |||
Sbjct 421 AGTATTGGCATGGGTAGTACTAGATAGTGCTGTCGACCTCTCAATGTATTAGGTTTATCC 480

Query 482 AACTCGTTGAATGGTGTGGCGGGATATTTCTGGTATTGTTGGCCCCGGCCTTACAACAACC 541
      |||
Sbjct 481 AACTCGTTGAATGGTGTGGCGGGATATTTCTGGTATTGTTGGCCCCGGCCTTACAACAACC 540

Query 542 AAACAAGTTTGACCTCAAATCAGGTAGGAATACCCGCTGAACTTAAGCATATCAATAAG 600
      |||
Sbjct 541 AAACAAGTTTGACCTCAAATCAGGTAGGAATACCCGCTGAACTTAAGCATATCAATAAG 599
```

>gb|GQ149494.1| Pichia guilliermondii strain UAF-62 18S ribosomal RNA gene, partial sequence; internal transcribed spacer 1, 5.8S ribosomal RNA gene, and internal transcribed spacer 2, complete sequence; and 28S ribosomal RNA gene, partial sequence  
Length=608

Score = 1105 bits (598), Expect = 0.0  
Identities = 605/608 (99%), Gaps = 1/608 (0%)  
Strand=Plus/Plus

```
Query 1 TCCGTAGGTGAACCTGCGGAAGGATCATTACAGTATTCTTTTGCCAGCGCTTAACTGCGC 60
      |||
Sbjct 1 TCCGTAGGTGAACCTGCGGAAGGATCATTACAGTATTCTTTTGCCAGCGCTTAACTGCGC 60

Query 61 GGCGAAAAACCTTACACACAGTGTCTTTTGGATAACAGAACTCTTGCTTTGGTTTGGCCTA 120
      |||
Sbjct 61 GGCGAAAAACCTTACACACAGTGTCTTTTGGATAACAGAACTCTTGCTTTGGTTTGGCCTA 120

Query 121 GAGATAGGTTGGGCCAGAGGTTTAAACAAAACACAATTTAATTATTTTACAGTTAGTCAA 180
      |||
Sbjct 121 GAGATAGGTTGGGCCAGAGGTTTAAACAAAACACAATTTAATTATTTTACAGTTAGTCAA 180
```

```

Query 181 ATTTTGAATTAATCTTCAAACCTTTCAACAACGGATCTCTTGGTTCTCGCATCGATGAAG 240
          |||
Sbjct 181 ATTTTGAATTAATCTTCAAACCTTTCAACAACGGATCTCTTGGTTCTCGCATCGATGAAG 240

Query 241 AACGCAGCGAAATGCGATAAGTAATATGAATTGCAGATTTTCGTGAATCATCGAATCTTT 300
          |||
Sbjct 241 AACGCAGCGAAATGCGATAAGTAATATGAATTGCAGATTTTCGTGAATCATCGAATCTTT 300

Query 301 GAACGCACATTGCGCCCTCTGGTATTCCAGAGGGCATGCCTGTTTGAGCGTCATTTCTCT 360
          |||
Sbjct 301 GAACGCACATTGCGCCCTCTGGTATTCCAGAGGGCATGCCTGTTTGAGCGTCATTTCTCT 360

Query 361 CTCAAACCCCCGGGTTTGGTATTGAGTGATACTCTTAGTCGGACTAGGCGTTTGCTTGAA 420
          |||
Sbjct 361 CTCAAACCCCCGGGTTTGGTATTGAGTGATACTCTTAGTCGGATTAGGCGTTTGCTTGAA 420

Query 421 AAGTATTGGCATGGGTAGTACTAGATAGTGCTGTCGACCTCTCAATGTATTAGGTTTATC 480
          |||
Sbjct 421 AAGTATTGGCATGGGTAGTACTGGATAGTGCTGTCGACCTCTCAATGTATTAGGTTTATC 480

Query 481 CAACTCGTTGAATGGTGTGGCGGGATATTTCTGGTATTGTTGGCCCGGCCTTACAACAAC 540
          |||
Sbjct 481 CAACTCGTTGAATGGTGTGGCGGGATATTTCTGGTATTGTTGGCCCGGCCTTACAACAAC 540

Query 541 CAAACAAGTTTGACCTCAAATCAGGTAGGAATACCCGCTGAAC-TTAAGCATATCAATAA 599
          |||
Sbjct 541 CAAACAAGTTTGACCTCAAATCAGGTAGGAATACCCGCTGAACCTTAAGCATATCAATAA 600

Query 600 GCGGAGGA 607
          |||
Sbjct 601 GCGGAGGA 608

```

>gb|EF532299.1| Pichia guilliermondii strain JHSa 18S ribosomal RNA gene, partial sequence; internal transcribed spacer 1, 5.8S ribosomal RNA gene, and internal transcribed spacer 2, complete sequence; and 26S ribosomal RNA gene, partial sequence  
Length=641

Score = 1105 bits (598), Expect = 0.0  
Identities = 604/607 (99%), Gaps = 0/607 (0%)  
Strand=Plus/Plus

```

Query 1 TCCGTAGGTGAACCTGCGGAAGGATCATTACAGTATTCTTTTGCCAGCGCTTAACTGCGC 60
          |||
Sbjct 30 TCCGTAGGTGAACCTGCGGAAGGATCATTACAGTATTCTTTTGCCAGCGCTTAACTGCGC 89

Query 61 GCGGAAAAACCTTACACACAGTGTCTTTTGGTATTGTTGGCCCGGCCTTACAACAAC 120
          |||
Sbjct 90 GCGGAAAAACCTTACACACAGTGTCTTTTGGTATTGTTGGCCCGGCCTTACAACAAC 149

Query 121 GAGATAGGTTGGGCCAGAGGTTTAACAAAACACAATTTAATTATTTTACAGTTAGTCAA 180
          |||
Sbjct 150 GAGATAGGTTGGGCCAGAGGTTTAACAAAACACAATTTAATTATTTTACAGTTAGTCAA 209

Query 181 ATTTTGAATTAATCTTCAAACCTTTCAACAACGGATCTCTTGGTTCTCGCATCGATGAAG 240
          |||
Sbjct 210 ATTTTGAATTAATCTTCAAACCTTTCAACAACGGATCTCTTGGTTCTCGCATCGATGAAG 269

Query 241 AACGCAGCGAAATGCGATAAGTAATATGAATTGCAGATTTTCGTGAATCATCGAATCTTT 300
          |||
Sbjct 270 AACGCAGCGAAATGCGATAAGTAATATGAATTGCAGATTTTCGTGAATCATCGAATCTTT 329

```

```

Query 301 GAACGCACATTGCGCCCTCTGGTATTCCAGAGGGCATGCCTGTTTGAGCGTCATTTCTCT 360
          |||
Sbjct 330 GAACGCACATTGCGCCCTCTGGTATTCCAGAGGGCATGCCTGTTTGAGCGTCATTTCTCT 389

Query 361 CTCAAACCCCCGGGTTTGGTATTGAGTGATACTCTTAGTCGGACTAGGCGTTTGCTTGAA 420
          |||
Sbjct 390 CTCAAACCCCCGGGTTTGGTATTGAGTGATACTCTTAGTCGGACTAGGCGTTTGCTTGAA 449

Query 421 AAGTATTGGCATGGGTAGTACTAGATAGTGCTGTTCGACCTCTCAATGTATTAGGTTTATC 480
          |||
Sbjct 450 AAGTATTGGCATGGGTAGTACTAGATAGTGCTGTTCGACCTCTCAATGTATTAGGTTTATC 509

Query 481 CAACTCGTTGAATGGTGTGGCGGGATATTTCTGGTATTGTTGGCCCGCCTTACAACAAC 540
          |||
Sbjct 510 CAACTCGTTGAATGGTGTGGCGGGATATTTCTGGTATTGTTGGCCCGCCTTACAACAAC 569

Query 541 CAAACAAGTTTGACCTCAAATCAGGTAGGAATACCCGCTGAACTTAAGCATATCAATAAG 600
          |||
Sbjct 570 CAAACAAGTTTGACCTCAAATCAGGTAGGAATACCCGCTGAACTTAAGCATATCAAAAAA 629

Query 601 CGGAGGA 607
          |||
Sbjct 630 CGGGGGA 636

```

>gb|EF197814.1| Pichia guilliermondii strain HK53 18S ribosomal RNA gene, partial sequence; internal transcribed spacer 1, 5.8S ribosomal RNA gene, and internal transcribed spacer 2, complete sequence; and 28S ribosomal RNA gene, partial sequence  
Length=635

Score = 1105 bits (598), Expect = 0.0  
Identities = 605/608 (99%), Gaps = 2/608 (0%)  
Strand=Plus/Plus

```

Query 1 TCCGTAGGTGAACCTGCGGAAGGATCATTACAGTATTCTTTTGCCAGCGCTTAACTGCGC 60
          |||
Sbjct 28 TCCGTAGGTGAACCTGCGGAAGGATCATTACAGTATTCTTTTGCCAGCGCTTAACTGCGC 87

Query 61 GGCGAAAAACCTTACACACAGTGTCTTTTTGATACAGAACTCTTGCTTTGGTTTGGCCTA 120
          |||
Sbjct 88 GGCGAAAAACCTTACACACAGTGTCTTTTTGATACAGAACTCTTGCTTTGGTTTGGCCTA 147

Query 121 GAGATAGGTTGGGCCAGAGGTTTAACAAAACACAATTTAATTATTTTACAGTTAGTCAA 180
          |||
Sbjct 148 GAGATAGGTTGGGCCAGAGGTTTAACAAAACACAATTTAATTATTTTACAGTTAGTCAA 207

Query 181 ATTTTGAATTAATCTTCAAACCTTTCAACAACGGATCTCTTGGTTCTCGCATCGATGAAG 240
          |||
Sbjct 208 ATTTTGAATTAATCTTCAAACCTTTCAACAACGGATCTCTTGGTTCTCGCATCGATGAAG 267

Query 241 AACGCAGCGAAATGCGATAAGTAATATGAATTGCAGATTTTCGTGAATCATCGAATCTTT 300
          |||
Sbjct 268 AACGCAGCGAAATGCGATAAGTAATATGAATTGCAGATTTTCGTGAATCATCGAATCTTT 327

Query 301 GAACGCACATTGCGCCCTCTGGTATTCCAGAGGGCATGCCTGTTTGAGCGTCATTTCTCT 360
          |||
Sbjct 328 GAACGCACATTGCGCCCTCTGGTATTCCAGAGGGCATGCCTGTTTGAGCGTCATTTCTCT 387

Query 361 CTCAAACCCCCGGGTTTGGTATTGAGTGATACTCTTAGTCGGACTAGGCGTTTGCTTGAA 420
          |||
Sbjct 388 CTCAAACCCCCGGGTTTGGTATTGAGTGATACTCTTAGTCGGACTAGGCGTTTGCTTGAA 447

Query 421 AAGTATTGGCATGGGTAGTACTAGATAGTGCTGTTCGACCTCTCAATGTATTAGGTTTATC 480

```

```

Sbjct 448 |||...||| 507
Query 481 CAACTCGTTGAATGGTGTGGCGGGATATTTCTGGTATTGTTGGCCCGGCCTTACAACAAC 540
Sbjct 508 |||...||| 567
Query 541 CAAACAAGTTTGACCTCAAATCAGGTAGGAATACCCGCTGAACTTAAGCATATCAATAAG 600
Sbjct 568 |||...||| 626
Query 601 C-GGAGGA 607
Sbjct 627 |||...||| CCGGAGGA 634

```

>gb|DQ683005.1| Pichia guilliermondii strain L11-2 18S ribosomal RNA gene, partial sequence; internal transcribed spacer 1, 5.8S ribosomal RNA gene, and internal transcribed spacer 2, complete sequence; and 28S ribosomal RNA gene, partial sequence  
Length=635

Score = 1105 bits (598), Expect = 0.0  
Identities = 606/609 (99%), Gaps = 3/609 (0%)  
Strand=Plus/Plus

```

Query 1 TCCGTAGGTGAACCTGCGGAAGGATCATTACAGTATTCTTTTGCCAGCGCTTAACTGCGC 60
Sbjct 27 |||...||| TCCGTAGGTGAACCTGCGGAAGGATCATTACAGTATTCTTTTGCCAGCGCTTAACTGCGC 86
Query 61 GGCGAAAAACCTTACACACAGTGTCTTTTGGATAACAGAACTCTTGCTTTGGTTTGGCCTA 120
Sbjct 87 |||...||| GGCGAAAAACCTTACACACAGTGTCTTTTGGATAACAGAACTCTTGCTTTGGTTTGGCCTA 146
Query 121 GAGATAGGTTGGGCCAGAGGTTTAAACAAAACACAATTTAATTATTTTACAGTTAGTCAA 180
Sbjct 147 |||...||| GAGATAGGTTGGGCCAGAGGTTTAAACAAAACACAATTTAATTATTTTACAGTTAGTCAA 206
Query 181 ATTTTGAATTAATCTTCAAACCTTTCAACAACGGATCTCTTGGTTCTCGCATCGATGAAG 240
Sbjct 207 |||...||| ATTTTGAATTAATCTTCAAACCTTTCAACAACGGATCTCTTGGTTCTCGCATCGATGAAG 266
Query 241 AACGCAGCGAAATGCGATAAGTAATATGAATTGCAGATTTTCGTGAATCATCGAATCTTT 300
Sbjct 267 |||...||| AACGCAGCGAAATGCGATAAGTAATATGAATTGCAGATTTTCGTGAATCATCGAATCTTT 326
Query 301 GAACGCACATTGCGCCCTCTGGTATTCCAGAGGGCATGCCTGTTTGAGCGTCATTTCTCT 360
Sbjct 327 |||...||| GAACGCACATTGCGCCCTCTGGTATTCCAGAGGGCATGCCTGTTTGAGCGTCATTTCTCT 386
Query 361 CTCAAACCCCCGGGTTTGGTATTGAGTGATACTCTTAGTTCGGACTAGGCGTTTGCTTGAA 420
Sbjct 387 |||...||| CTCAAACCCCCGGGTTTGGTATTGAGTGATACTCTTAGTTCGGACTAGGCGTTTGCTTGAA 446
Query 421 AAGTATTGGCATGGGTAGTACTAGATAGTGCTGTCGACCTCTCAATGTATTAGGTTTATC 480
Sbjct 447 |||...||| AAGTATTGGCATGGGTAGTACTAGATAGTGCTGTCGACCTCTCAATGTATTAGGTTTATC 506
Query 481 CAACTCGTTGAATGGTGTGGCGGGATATTTCTGGTATTGTTGGCCCGGCCTTACAACAAC 540
Sbjct 507 |||...||| CAACTCGTTGAATGGTGTGGCGGGATATTTCTGGTATTGTTGGCCCGGCCTTACAACAAC 566
Query 541 CAAACAAGTTTGACCTCAAATCAGGTAGGAATACCCGCTGAACTTAAGCATATCAATAAG 600
Sbjct |||...|||

```





sequence  
Length=607

Score = 1105 bits (598), Expect = 0.0  
Identities = 598/598 (100%), Gaps = 0/598 (0%)  
Strand=Plus/Plus

```
Query 3 CGTAGGTGAACCTGCGGAAGGATCATTACAGTATTCTTTTGCCAGCGCTTAACTGCGCGG 62
      |||
Sbjct 1 CGTAGGTGAACCTGCGGAAGGATCATTACAGTATTCTTTTGCCAGCGCTTAACTGCGCGG 60

Query 63 CGAAAAACCTTACACACAGTGTCTTTTGGATAACAGAACTCTTGCTTTGGTTTGGCCTAGA 122
      |||
Sbjct 61 CGAAAAACCTTACACACAGTGTCTTTTGGATAACAGAACTCTTGCTTTGGTTTGGCCTAGA 120

Query 123 GATAGGTTGGGCCAGAGGTTTAAACAAAACACAATTTAATTATTTTACAGTTAGTCAAAT 182
      |||
Sbjct 121 GATAGGTTGGGCCAGAGGTTTAAACAAAACACAATTTAATTATTTTACAGTTAGTCAAAT 180

Query 183 TTTGAATTAATCTTCAAACCTTTCAACAACGGATCTCTTGGTTCTCGCATCGATGAAGAA 242
      |||
Sbjct 181 TTTGAATTAATCTTCAAACCTTTCAACAACGGATCTCTTGGTTCTCGCATCGATGAAGAA 240

Query 243 CGCAGCGAAATGCGATAAGTAATATGAATTGCAGATTTTCGTGAATCATCGAATCTTTGA 302
      |||
Sbjct 241 CGCAGCGAAATGCGATAAGTAATATGAATTGCAGATTTTCGTGAATCATCGAATCTTTGA 300

Query 303 ACGCACATTGCGCCCTCTGGTATTCCAGAGGGCATGCCTGTTTGAGCGTCATTTCTCTCT 362
      |||
Sbjct 301 ACGCACATTGCGCCCTCTGGTATTCCAGAGGGCATGCCTGTTTGAGCGTCATTTCTCTCT 360

Query 363 CAAACCCCCGGGTTTGGTATTGAGTGATACTCTTAGTCGGACTAGGCGTTTGCTTGAAAA 422
      |||
Sbjct 361 CAAACCCCCGGGTTTGGTATTGAGTGATACTCTTAGTCGGACTAGGCGTTTGCTTGAAAA 420

Query 423 GTATTGGCATGGGTAGTACTAGATAGTGCTGTCGACCTCTCAATGTATTAGGTTTATCCA 482
      |||
Sbjct 421 GTATTGGCATGGGTAGTACTAGATAGTGCTGTCGACCTCTCAATGTATTAGGTTTATCCA 480

Query 483 ACTCGTTGAATGGTGTGGCGGGATATTTCTGGTATTGTTGGCCCGGCCTTACAACAACCA 542
      |||
Sbjct 481 ACTCGTTGAATGGTGTGGCGGGATATTTCTGGTATTGTTGGCCCGGCCTTACAACAACCA 540

Query 543 AACAAAGTTTGACCTCAAATCAGGTAGGAATACCCGCTGAACTTAAGCATATCAATAAG 600
      |||
Sbjct 541 AACAAAGTTTGACCTCAAATCAGGTAGGAATACCCGCTGAACTTAAGCATATCAATAAG 598
```

>gb|GQ280287.1| *Pichia guilliermondii* isolate ZA016 18S ribosomal RNA gene, partial  
sequence; internal transcribed spacer 1, 5.8S ribosomal  
RNA gene, and internal transcribed spacer 2, complete sequence;  
and 28S ribosomal RNA gene, partial sequence  
Length=614

Score = 1103 bits (597), Expect = 0.0  
Identities = 607/611 (99%), Gaps = 4/611 (0%)  
Strand=Plus/Plus

```
Query 1 TCCGTA-GGTGAACCTGCGGAAGGATCATTACAGTATTCTTTTGCCAGCGCTTAACTGCG 59
      |||
Sbjct 3 TCCGTAGGGTGAACCTGCGGAAGGATCATTACAGTATTCTTTTGCCAGCGCTTAACTGCG 62

Query 60 CGGCGAAAAACCTTACACACAGTGTCTTTTGGATAACAGAACTCTTG-C-TTTGGTTTGGC 117
      |||
```

|       |     |                                                               |     |
|-------|-----|---------------------------------------------------------------|-----|
| Sbjct | 63  | CGGCGAAAAACCTTACACACAGTGTCTTTTTGATACAGAACTCTTGCCTTTTGGTTTGGC  | 122 |
| Query | 118 | CTAGAGATAGGTTGGGCCAGAGGTTTAAACAAAACACAATTTAATTATTTTTACAGTTAGT | 177 |
| Sbjct | 123 | CTAGAGATAGGTTGGGCCAGAGGTTTAAACAAAACACAATTTAATTATTTTTACAGTTAGT | 182 |
| Query | 178 | CAAATTTTGAATTAATCTTCAAACCTTTCAACAACGGATCTCTTGGTTCTCGCATCGATG  | 237 |
| Sbjct | 183 | CAAATTTTGAATTAATCTTCAAACCTTTCAACAACGGATCTCTTGGTTCTCGCATCGATG  | 242 |
| Query | 238 | AAGAACGCAGCGAAATGCGATAAGTAATATGAATTGCAGATTTTCGTGAATCATCGAATC  | 297 |
| Sbjct | 243 | AAGAACGCAGCGAAATGCGATAAGTAATATGAATTGCAGATTTTCGTGAATCATCGAATC  | 302 |
| Query | 298 | TTTGAACGCACATTGCGCCCTCTGGTATTCCAGAGGGCATGCCTGTTTGAGCGTCATTTTC | 357 |
| Sbjct | 303 | TTTGAACGCACATTGCGCCCTCTGGTATTCCAGAGGGCATGCCTGTTTGAGCGTCATTTTC | 362 |
| Query | 358 | TCTCTCAAACCCCGGGTTTGGTATTGAGTGATACTCTTAGTCGGACTAGGCGTTTGCTT   | 417 |
| Sbjct | 363 | TCTCTCAAACCCCGGGTTTGGTATTGAGTGATACTCTTAGTCGGACTAGGCGTTTGCTT   | 422 |
| Query | 418 | GAAAAGTATTGGCATGGGTAGTACTAGATAGTGCTGTCGACCTCTCAATGTATTAGGTTT  | 477 |
| Sbjct | 423 | GAAAAGTATTGGCATGGGTAGTACTAGATAGTGCTGTCGACCTCTCAATGTATTAGGTTT  | 482 |
| Query | 478 | ATCCAACCTCGTTGAATGGTGTGGCGGGATATTTCTGGTATTGTTGGCCCGGCCTTACAAC | 537 |
| Sbjct | 483 | ATCCAACCTCGTTGAATGGTGTGGCGGGATATTTCTGGTATTGTTGGCCCGGCCTTACAAC | 542 |
| Query | 538 | AACCAAACAAGTTTGACCTCAAATCAGGTAGGAATACCCGCTGAACTTAAGCATATCAAT  | 597 |
| Sbjct | 543 | AACCAAACAAGTTTGACCTCAAATCAGGTAGGAATACCCGCTGAACTTAAGCATATCAAT  | 602 |
| Query | 598 | AAGC-GGAGGA 607                                               |     |
| Sbjct | 603 | AAGCCGGAGGA 613                                               |     |

>gb|EF222226.1| Pichia guilliermondii strain HK55a 18S ribosomal RNA gene, partial sequence; internal transcribed spacer 1, 5.8S ribosomal RNA gene, and internal transcribed spacer 2, complete sequence; and 28S ribosomal RNA gene, partial sequence  
Length=616

Score = 1101 bits (596), Expect = 0.0  
Identities = 598/599 (99%), Gaps = 0/599 (0%)  
Strand=Plus/Plus

|       |     |                                                               |     |
|-------|-----|---------------------------------------------------------------|-----|
| Query | 1   | TCCGTAGGTGAACCTGCGGAAGGATCATTACAGTATTCTTTTGCCAGCGCTTAACTGCGC  | 60  |
| Sbjct | 18  | TCCGTAGGTGAACCTGCGGAAGGATCATTACAGTATTCTTTTGCCAGCGCTTAACTGCGC  | 77  |
| Query | 61  | GGCGAAAAACCTTACACACAGTGTCTTTTTGATACAGAACTCTTGCTTTGGTTTGGCCTA  | 120 |
| Sbjct | 78  | GGCGAAAAACCTTACACACAGTGTCTTTTTGATACAGAACTCTTGCTTTGGTTTGGCCTA  | 137 |
| Query | 121 | GAGATAGGTTGGGCCAGAGGTTTAAACAAAACACAATTTAATTATTTTTACAGTTAGTCAA | 180 |
| Sbjct | 138 | GAGATAGGTTGGGCCAGAGGTTTAAACAAAACACAATTTAATTATTTTTACAGTTAGTCAA | 197 |
| Query | 181 | ATTTTGAATTAATCTTCAAACCTTTCAACAACGGATCTCTTGGTTCTCGCATCGATGAAG  | 240 |
| Sbjct | 198 | ATTTTGAATTAATCTTCAAACCTTTCAACAACGGATCTCTTGGTTCTCGCATCGATGAAG  | 257 |

```

Query 241 AACGCAGCGAAATGCGATAAGTAATATGAATTGCAGATTTTCGTGAATCATCGAATCTTT 300
          |||
Sbjct 258 AACGCAGCGAAATGCGATAAGTAATATGAATTGCAGATTTTCGTGAATCATCGAATCTTT 317

Query 301 GAACGCACATTGCGCCCTCTGGTATTCCAGAGGGCATGCCTGTTTGAGCGTCATTTCTCT 360
          |||
Sbjct 318 GAACGCACATTGCGCCCTCTGGTATTCCAGAGGGCATGCCTGTTTGAGCGTCATTTCTCT 377

Query 361 CTCAAACCCCCGGGTTTGGTATTGAGTGATACTCTTAGTCGGACTAGGCGTTTGCTTGAA 420
          |||
Sbjct 378 CTCAAACCCCCGGGTTTGGTATTGAGTGATACTCTTAGTCGGACTAGGCGTTTGCTTGAA 437

Query 421 AAGTATTGGCATGGGTAGTACTAGATAGTGCTGTGCGACCTCTCAATGTATTAGGTTTATC 480
          |||
Sbjct 438 AAGTATTGGCATGGGTAGTACTGGATAGTGCTGTGCGACCTCTCAATGTATTAGGTTTATC 497

Query 481 CAACTCGTTGAATGGTGTGGCGGGATATTTCTGGTATTGTTGGCCCGGCCTTACAACAAC 540
          |||
Sbjct 498 CAACTCGTTGAATGGTGTGGCGGGATATTTCTGGTATTGTTGGCCCGGCCTTACAACAAC 557

Query 541 CAAACAAGTTTGACCTCAAATCAGGTAGGAATACCCGCTGAACTTAAGCATATCAATAA 599
          |||
Sbjct 558 CAAACAAGTTTGACCTCAAATCAGGTAGGAATACCCGCTGAACTTAAGCATATCAATAA 616

```

>gb|EF190233.1| *Pichia guilliermondii* strain 3-2 18S ribosomal RNA gene, partial sequence; internal transcribed spacer 1, 5.8S ribosomal RNA gene, and internal transcribed spacer 2, complete sequence; and 28S ribosomal RNA gene, partial sequence  
Length=642

Score = 1101 bits (596), Expect = 0.0  
Identities = 596/596 (100%), Gaps = 0/596 (0%)  
Strand=Plus/Plus

```

Query 1 TCCGTAGGTGAACCTGCGGAAGGATCATTACAGTATTCTTTTGCCAGCGCTTAACTGCGC 60
          |||
Sbjct 31 TCCGTAGGTGAACCTGCGGAAGGATCATTACAGTATTCTTTTGCCAGCGCTTAACTGCGC 90

Query 61 GGCGAAAAACCTTACACACAGTGTCTTTTGATACAGAACTCTTGCTTTGGTTTGGCCTA 120
          |||
Sbjct 91 GGCGAAAAACCTTACACACAGTGTCTTTTGATACAGAACTCTTGCTTTGGTTTGGCCTA 150

Query 121 GAGATAGGTTGGGCCAGAGGTTTAACAAAACACAATTTAATTATTTTACAGTTAGTCAA 180
          |||
Sbjct 151 GAGATAGGTTGGGCCAGAGGTTTAACAAAACACAATTTAATTATTTTACAGTTAGTCAA 210

Query 181 ATTTTGAATTAATCTTCAAACCTTTCAACAACGGATCTCTTGGTTCTCGCATCGATGAAG 240
          |||
Sbjct 211 ATTTTGAATTAATCTTCAAACCTTTCAACAACGGATCTCTTGGTTCTCGCATCGATGAAG 270

Query 241 AACGCAGCGAAATGCGATAAGTAATATGAATTGCAGATTTTCGTGAATCATCGAATCTTT 300
          |||
Sbjct 271 AACGCAGCGAAATGCGATAAGTAATATGAATTGCAGATTTTCGTGAATCATCGAATCTTT 330

Query 301 GAACGCACATTGCGCCCTCTGGTATTCCAGAGGGCATGCCTGTTTGAGCGTCATTTCTCT 360
          |||
Sbjct 331 GAACGCACATTGCGCCCTCTGGTATTCCAGAGGGCATGCCTGTTTGAGCGTCATTTCTCT 390

Query 361 CTCAAACCCCCGGGTTTGGTATTGAGTGATACTCTTAGTCGGACTAGGCGTTTGCTTGAA 420
          |||
Sbjct 391 CTCAAACCCCCGGGTTTGGTATTGAGTGATACTCTTAGTCGGACTAGGCGTTTGCTTGAA 450

```

```

Query 421 AAGTATTGGCATGGGTAGTACTAGATAGTGCTGTCGACCTCTCAATGTATTAGGTTTATC 480
          |||
Sbjct 451 AAGTATTGGCATGGGTAGTACTAGATAGTGCTGTCGACCTCTCAATGTATTAGGTTTATC 510

Query 481 CAACTCGTTGAATGGTGTGGCGGGATATTTCTGGTATTGTTGGCCCGGCCTTACAACAAC 540
          |||
Sbjct 511 CAACTCGTTGAATGGTGTGGCGGGATATTTCTGGTATTGTTGGCCCGGCCTTACAACAAC 570

Query 541 CAAACAAGTTTGACCTCAAATCAGGTAGGAATACCCGCTGAACTTAAGCATATCAA 596
          |||
Sbjct 571 CAAACAAGTTTGACCTCAAATCAGGTAGGAATACCCGCTGAACTTAAGCATATCAA 626

```

>gb|EF192233.1| Pichia guilliermondii strain gaozhong 18S ribosomal RNA gene, partial sequence; internal transcribed spacer 1, 5.8S ribosomal RNA gene, and internal transcribed spacer 2, complete sequence; and 28S ribosomal RNA gene, partial sequence  
Length=624

Score = 1101 bits (596), Expect = 0.0  
Identities = 596/596 (100%), Gaps = 0/596 (0%)  
Strand=Plus/Plus

```

Query 1 TCCGTAGGTGAACCTGCGGAAGGATCATTACAGTATTCTTTTGCCAGCGCTTAACTGCGC 60
          |||
Sbjct 27 TCCGTAGGTGAACCTGCGGAAGGATCATTACAGTATTCTTTTGCCAGCGCTTAACTGCGC 86

Query 61 GGCGAAAAACCTTACACACAGTGTCTTTTGGATAACAGAACTCTTGCTTTGGTTTGGCCTA 120
          |||
Sbjct 87 GGCGAAAAACCTTACACACAGTGTCTTTTGGATAACAGAACTCTTGCTTTGGTTTGGCCTA 146

Query 121 GAGATAGGTTGGGCCAGAGGTTTAAACAAAAACAAATTTAATTATTTTACAGTTAGTCAA 180
          |||
Sbjct 147 GAGATAGGTTGGGCCAGAGGTTTAAACAAAAACAAATTTAATTATTTTACAGTTAGTCAA 206

Query 181 ATTTTGAATTAATCTTCAAACCTTTCAACAACGGATCTCTTGGTTCTCGCATCGATGAAG 240
          |||
Sbjct 207 ATTTTGAATTAATCTTCAAACCTTTCAACAACGGATCTCTTGGTTCTCGCATCGATGAAG 266

Query 241 AACGCAGCGAAATGCGATAAGTAATATGAATTGCAGATTTTCGTGAATCATCGAATCTTT 300
          |||
Sbjct 267 AACGCAGCGAAATGCGATAAGTAATATGAATTGCAGATTTTCGTGAATCATCGAATCTTT 326

Query 301 GAACGCACATTGCGCCCTCTGGTATTCCAGAGGGCATGCCTGTTTGAGCGTCATTTCTCT 360
          |||
Sbjct 327 GAACGCACATTGCGCCCTCTGGTATTCCAGAGGGCATGCCTGTTTGAGCGTCATTTCTCT 386

Query 361 CTCAAACCCCCGGGTTTGGTATTGAGTGATACTCTTAGTCGGACTAGGCGTTTGCTTGAA 420
          |||
Sbjct 387 CTCAAACCCCCGGGTTTGGTATTGAGTGATACTCTTAGTCGGACTAGGCGTTTGCTTGAA 446

Query 421 AAGTATTGGCATGGGTAGTACTAGATAGTGCTGTCGACCTCTCAATGTATTAGGTTTATC 480
          |||
Sbjct 447 AAGTATTGGCATGGGTAGTACTAGATAGTGCTGTCGACCTCTCAATGTATTAGGTTTATC 506

Query 481 CAACTCGTTGAATGGTGTGGCGGGATATTTCTGGTATTGTTGGCCCGGCCTTACAACAAC 540
          |||
Sbjct 507 CAACTCGTTGAATGGTGTGGCGGGATATTTCTGGTATTGTTGGCCCGGCCTTACAACAAC 566

Query 541 CAAACAAGTTTGACCTCAAATCAGGTAGGAATACCCGCTGAACTTAAGCATATCAA 596
          |||
Sbjct 567 CAAACAAGTTTGACCTCAAATCAGGTAGGAATACCCGCTGAACTTAAGCATATCAA 622

```

>gb|EF193071.1| Pichia guilliermondii voucher MCCC2E00277 18S ribosomal RNA gene, partial sequence; internal transcribed spacer 1, 5.8S ribosomal RNA gene, and internal transcribed spacer 2, complete sequence; and 28S ribosomal RNA gene, partial sequence  
Length=627

Score = 1101 bits (596), Expect = 0.0  
Identities = 596/596 (100%), Gaps = 0/596 (0%)  
Strand=Plus/Plus

```
Query 1 TCCGTAGGTGAACCTGCGGAAGGATCATTACAGTATTCTTTTGCCAGCGCTTAACTGCGC 60
      |||
Sbjct 31 TCCGTAGGTGAACCTGCGGAAGGATCATTACAGTATTCTTTTGCCAGCGCTTAACTGCGC 90

Query 61 GGCGAAAAACCTTACACACAGTGTCTTTTGATAACAGAACTCTTGCTTTGGTTTGGCCTA 120
      |||
Sbjct 91 GGCGAAAAACCTTACACACAGTGTCTTTTGATAACAGAACTCTTGCTTTGGTTTGGCCTA 150

Query 121 GAGATAGGTTGGGCCAGAGGTTTAAACAAAACACAATTTAATTATTTTACAGTTAGTCAA 180
      |||
Sbjct 151 GAGATAGGTTGGGCCAGAGGTTTAAACAAAACACAATTTAATTATTTTACAGTTAGTCAA 210

Query 181 ATTTTGAATTAATCTTCAAACCTTTCAACAACGGATCTCTTGGTTCTCGCATCGATGAAG 240
      |||
Sbjct 211 ATTTTGAATTAATCTTCAAACCTTTCAACAACGGATCTCTTGGTTCTCGCATCGATGAAG 270

Query 241 AACGCAGCGAAATGCGATAAGTAATATGAATTGCAGATTTTCGTGAATCATCGAATCTTT 300
      |||
Sbjct 271 AACGCAGCGAAATGCGATAAGTAATATGAATTGCAGATTTTCGTGAATCATCGAATCTTT 330

Query 301 GAACGCACATTGCGCCCTCTGGTATTCCAGAGGGCATGCCTGTTTGAGCGTCATTTCTCT 360
      |||
Sbjct 331 GAACGCACATTGCGCCCTCTGGTATTCCAGAGGGCATGCCTGTTTGAGCGTCATTTCTCT 390

Query 361 CTCAAACCCCCGGGTTTGGTATTGAGTGATACTCTTAGTCGGACTAGGCGTTTGCTTGAA 420
      |||
Sbjct 391 CTCAAACCCCCGGGTTTGGTATTGAGTGATACTCTTAGTCGGACTAGGCGTTTGCTTGAA 450

Query 421 AAGTATTGGCATGGGTAGTACTAGATAGTGCTGTGACCTCTCAATGTATTAGGTTTATC 480
      |||
Sbjct 451 AAGTATTGGCATGGGTAGTACTAGATAGTGCTGTGACCTCTCAATGTATTAGGTTTATC 510

Query 481 CAACTCGTTGAATGGTGTGGCGGGATATTTCTGGTATTGTTGGCCCGGCCTTACAACAAC 540
      |||
Sbjct 511 CAACTCGTTGAATGGTGTGGCGGGATATTTCTGGTATTGTTGGCCCGGCCTTACAACAAC 570

Query 541 CAAACAAGTTTGACCTCAAATCAGGTAGGAATACCCGCTGAACTTAAGCATATCAA 596
      |||
Sbjct 571 CAAACAAGTTTGACCTCAAATCAGGTAGGAATACCCGCTGAACTTAAGCATATCAA 626
```

>gb|DQ668353.1| Pichia guilliermondii isolate L4-1 18S ribosomal RNA gene, partial sequence; internal transcribed spacer 1, 5.8S ribosomal RNA gene, and internal transcribed spacer 2, complete sequence; and 28S ribosomal RNA gene, partial sequence  
Length=622

Score = 1101 bits (596), Expect = 0.0  
Identities = 596/596 (100%), Gaps = 0/596 (0%)  
Strand=Plus/Plus

```
Query 1 TCCGTAGGTGAACCTGCGGAAGGATCATTACAGTATTCTTTTGCCAGCGCTTAACTGCGC 60
      |||
Sbjct 26 TCCGTAGGTGAACCTGCGGAAGGATCATTACAGTATTCTTTTGCCAGCGCTTAACTGCGC 85
```

```

Query 61  GCGGAAAAACCTTACACACAGTGTCTTTTTGATACAGAACTCTTGCTTTGGTTTGGCCTA 120
          |||
Sbjct 86  GCGGAAAAACCTTACACACAGTGTCTTTTTGATACAGAACTCTTGCTTTGGTTTGGCCTA 145

Query 121 GAGATAGGTTGGGCCAGAGGTTTAACAAAACACAATTTAATTATTTTTACAGTTAGTCAA 180
          |||
Sbjct 146 GAGATAGGTTGGGCCAGAGGTTTAACAAAACACAATTTAATTATTTTTACAGTTAGTCAA 205

Query 181  ATTTTGAATTAATCTTCAAACCTTTCAACAACGGATCTCTTGGTTCTCGCATCGATGAAG 240
          |||
Sbjct 206  ATTTTGAATTAATCTTCAAACCTTTCAACAACGGATCTCTTGGTTCTCGCATCGATGAAG 265

Query 241  AACGCAGCGAAATGCGATAAGTAATATGAATTGCAGATTTTCGTGAATCATCGAATCTTT 300
          |||
Sbjct 266  AACGCAGCGAAATGCGATAAGTAATATGAATTGCAGATTTTCGTGAATCATCGAATCTTT 325

Query 301  GAACGCACATTGCGCCCTCTGGTATTCCAGAGGGCATGCCTGTTTGAGCGTCATTTCTCT 360
          |||
Sbjct 326  GAACGCACATTGCGCCCTCTGGTATTCCAGAGGGCATGCCTGTTTGAGCGTCATTTCTCT 385

Query 361  CTCAAACCCCCGGGTTTGGTATTGAGTGATACTCTTAGTCGGACTAGGCGTTTGCTTGAA 420
          |||
Sbjct 386  CTCAAACCCCCGGGTTTGGTATTGAGTGATACTCTTAGTCGGACTAGGCGTTTGCTTGAA 445

Query 421  AAGTATTGGCATGGGTAGTACTAGATAGTGCTGTGACCTCTCAATGTATTAGGTTTATC 480
          |||
Sbjct 446  AAGTATTGGCATGGGTAGTACTAGATAGTGCTGTGACCTCTCAATGTATTAGGTTTATC 505

Query 481  CAACTCGTTGAATGGTGTGGCGGGATATTTCTGGTATTGTTGGCCCGGCCTTACAACAAC 540
          |||
Sbjct 506  CAACTCGTTGAATGGTGTGGCGGGATATTTCTGGTATTGTTGGCCCGGCCTTACAACAAC 565

Query 541  CAAACAAGTTTGACCTCAAATCAGGTAGGAATACCCGCTGAACTTAAGCATATCAA 596
          |||
Sbjct 566  CAAACAAGTTTGACCTCAAATCAGGTAGGAATACCCGCTGAACTTAAGCATATCAA 621

```

```

>gb|FJ515181.1| Pichia guilliermondii strain SN4 18S ribosomal RNA gene, partial
sequence; internal transcribed spacer 1, 5.8S ribosomal
RNA gene, and internal transcribed spacer 2, complete sequence;
and 28S ribosomal RNA gene, partial sequence
Length=605

```

```

Score = 1099 bits (595), Expect = 0.0
Identities = 602/605 (99%), Gaps = 2/605 (0%)
Strand=Plus/Plus

```

```

Query 4  GTA-GGTGAACCTGCGGAAGGATCATTACAGTATTCTTTTGCCAGCGCTTAACTGCGCGG 62
          |||
Sbjct 1  GTAGGGTGAACCTGCGGAAGGATCATTACAGTATTCTTTTGCCAGCGCTTAACTGCGCGG 60

Query 63  CGAAAAACCTTACACACAGTGTCTTTTTGATACAGAACTCTTGCTTTGGTTTGGCCTAGA 122
          |||
Sbjct 61  CGAAAAACCTTACACACAGTGTCTTTTTGATACAGAACTCTTGCTTTGGTTTGGCCTAGA 120

Query 123 GATAGGTTGGGCCAGAGGTTTAACAAAACACAATTTAATTATTTTTACAGTTAGTCAAAT 182
          |||
Sbjct 121 GATAGGTTGGGCCAGAGGTTTAACAAAACACAATTTAATTATTTTTACAGTTAGTCAAAT 180

Query 183  TTTGAATTAATCTTCAAACCTTTCAACAACGGATCTCTTGGTTCTCGCATCGATGAAGAA 242
          |||
Sbjct 181  TTTGAATTAATCTTCAAACCTTTCAACAACGGATCTCTTGGTTCTCGCATCGATGAAGAA 240

```

```

Query 243 CGCAGCGAAATGCGATAAGTAATATGAATTGCAGATTTTCGTGAATCATCGAATCTTTGA 302
          |||
Sbjct 241 CGCAGCGAAATGCGATAAGTAATATGAATTGCAGATTTTCGTGAATCATCGAATCTTTGA 300

Query 303 ACGCACATTGCGCCCTCTGGTATTCCAGAGGGCATGCCTGTTTGAGCGTCATTTCTCTCT 362
          |||
Sbjct 301 ACGCACATTGCGCCCTCTGGTATTCCAGAGGGCATGCCTGTTTGAGCGTCATTTCTCTCT 360

Query 363 CAAACCCCGGGTTTGGTATTGAGTGATACTCTTAGTCGGACTAGGCGTTTGCTTGAAAA 422
          |||
Sbjct 361 CAAACCCCGGGTTTGGTATTGAGTGATACTCTTAGTCGGACTAGGCGTTTGCTTGAAAA 420

Query 423 GTATTGGCATGGGTAGTACTAGATAGTGCTGTCGACCTCTCAATGTATTAGGTTTATCCA 482
          |||
Sbjct 421 GTATTGGCATGGGTAGTACTGGATAGTGCTGTCGACCTCTCAATGTATTAGGTTTATCCA 480

Query 483 ACTCGTTGAATGGTGTGGCGGGATATTTCTGGTATTGTTGGCCCGGCCTTACAACAACCA 542
          |||
Sbjct 481 ACTCGTTGAATGGTGTGGCGGGATATTTCTGGTATTGTTGGCCCGGCCTTACAACAACCA 540

Query 543 AACAAAGTTTGACCTCAAATCAGGTAGGAATACCCGCTGAACTTAAGCATATCAATAAGCG 602
          |||
Sbjct 541 AACAAAGTT-GACCTCAAATCAGGTAGGAATACCCGCTGAACTTAAGCATATCAATAAGCG 599

Query 603 GAGGA 607
          |||
Sbjct 600 GAGGA 604

```

>gb|EF643595.1| *Pichia guilliermondii* strain LN-9 18S ribosomal RNA gene, partial sequence; internal transcribed spacer 1, 5.8S ribosomal RNA gene, and internal transcribed spacer 2, complete sequence; and 28S ribosomal RNA gene, partial sequence  
Length=648

Score = 1099 bits (595), Expect = 0.0  
Identities = 597/598 (99%), Gaps = 0/598 (0%)  
Strand=Plus/Plus

```

Query 1 TCCGTAGGTGAACCTGCGGAAGGATCATTACAGTATTCTTTTGCCAGCGCTTAACTGCGC 60
          |||
Sbjct 35 TCCGTAGGTGAACCTGCGGAAGGATCATTACAGTATTCTTTTGCCAGCGCTTAACTGCGC 94

Query 61 GGCGAAAAACCTTACACACAGTGTCTTTTGATACAGAACTCTTGCTTTGGTTTGGCCTA 120
          |||
Sbjct 95 GGCGAAAAACCTTACACACAGTGTCTTTTGATACAGAACTCTTGCTTTGGTTTGGCCTA 154

Query 121 GAGATAGGTTGGGCCAGAGGTTTAACAAAACACAATTTAATTATTTTACAGTTAGTCAA 180
          |||
Sbjct 155 GAGATAGGTTGGGCCAGAGGTTTAACAAAACACAATTTAATTATTTTACAGTTAGTCAA 214

Query 181 ATTTTGAATTAATCTTCAAACCTTTCAACAACGGATCTCTTGGTTCTCGCATCGATGAAG 240
          |||
Sbjct 215 ATTTTGAATTAATCTTCAAACCTTTCAACAACGGATCTCTTGGTTCTCGCATCGATGAAG 274

Query 241 AACGCAGCGAAATGCGATAAGTAATATGAATTGCAGATTTTCGTGAATCATCGAATCTTT 300
          |||
Sbjct 275 AACGCAGCGAAATGCGATAAGTAATATGAATTGCAGATTTTCGTGAATCATCGAATCTTT 334

Query 301 GAACGCACATTGCGCCCTCTGGTATTCCAGAGGGCATGCCTGTTTGAGCGTCATTTCTCT 360
          |||
Sbjct 335 GAACGCACATTGCGCCCTCTGGTATTCCAGAGGGCATGCCTGTTTGAGCGTCATTTCTCT 394

Query 361 CTCAAACCCCGGGTTTGGTATTGAGTGATACTCTTAGTCGGACTAGGCGTTTGCTTGAA 420

```

```

Sbjct 395  |||...|||
CTCAAACCCCGGGTTTGGTATTGAGTGATACTCTTAGTCGGACTAGGCGTTTGCTTGAA 454

Query 421  AAGTATTGGCATGGGTAGTACTAGATAGTGCTGTTCGACCTCTCAATGTATTAGGTTTATC 480
|||...|||

Sbjct 455  AAGTATTGGCATGGGTAGTACTAGATAGTGCTGTTCGACCTCTCAATGTATTAGGTTTATC 514

Query 481  CAACTCGTTGAATGGTGTGGCGGGATATTTCTGGTATTGTTGGCCCGGCCTTACAACAAC 540
|||...|||

Sbjct 515  CAACTCGTTGAATGGTGTGGCGGGATATTTCTGGTATTGTTGGCCCGGCCTTACAACAAC 574

Query 541  CAAACAAGTTTGACCTCAAATCAGGTAGGAATACCCGCTGAACTTAAGCATATCAATA 598
|||...|||

Sbjct 575  CAAACAAGTTTGACCTCAAATCAGGCAGGAATACCCGCTGAACTTAAGCATATCAATA 632

```

>gb|EF197809.1| *Pichia guilliermondii* strain HK51b 18S ribosomal RNA gene, partial sequence; internal transcribed spacer 1, 5.8S ribosomal RNA gene, and internal transcribed spacer 2, complete sequence; and 28S ribosomal RNA gene, partial sequence  
Length=624

Score = 1098 bits (594), Expect = 0.0  
Identities = 599/601 (99%), Gaps = 1/601 (0%)  
Strand=Plus/Plus

```

Query 1    TCCGTAGGTGAACCTGCGGAAGGATCATTACAGTATTCTTTTGCCAGCGCTTAACTGCGC 60
|||...|||

Sbjct 15   TCCGTAGGTGAACCTGCGGAAGGATCATTACAGTATTCTTTTGCCAGCGCTTAACTGCGC 74

Query 61   GGCGAAAAACCTTACACACAGTGTCTTTTTGATACAGAACTCTTGCTTTGGTTTGGCCTA 120
|||...|||

Sbjct 75   GGCGAAAAACCTTACACACAGTGTCTTTTTGATACAGAACTCTTGCTTTGGTTTGGCCTA 134

Query 121  GAGATAGGTTGGGCCAGAGGTTTAACAAAAACAAATTTAATTATTTTACAGTTAGTCAA 180
|||...|||

Sbjct 135  GAGATAGGTTGGGCCAGAGGTTTAACAAAAACAAATTTAATTATTTTACAGTTAGTCAA 194

Query 181  ATTTTGAATTAATCTTCAAACTTTCAACAACGGATCTCTTGGTTCTCGCATCGATGAAG 240
|||...|||

Sbjct 195  ATTTTGAATTAATCTTCAAACTTTCAACAACGGATCTCTTGGTTCTCGCATCGATGAAG 254

Query 241  AACGCAGCGAAATGCGATAAGTAATATGAATTGCAGATTTTCGTGAATCATCGAATCTTT 300
|||...|||

Sbjct 255  AACGCAGCGAAATGCGATAAGTAATATGAATTGCAGATTTTCGTGAATCATCGAATCTTT 314

Query 301  GAACGCACATTGCGCCCTCTGGTATTCCAGAGGGCATGCCTGTTTGAGCGTCATTTCTCT 360
|||...|||

Sbjct 315  GAACGCACATTGCGCCCTCTGGTATTCCAGAGGGCATGCCTGTTTGAGCGTCATTTCTCT 374

Query 361  CTCAAACCCCGGGTTTGGTATTGAGTGATACTCTTAGTCGGACTAGGCGTTTGCTTGAA 420
|||...|||

Sbjct 375  CTCAAACCCCGGGTTTGGTATTGAGTGATACTCTTAGTCGGACTAGGCGTTTGCTTGAA 434

Query 421  AAGTATTGGCATGGGTAGTACTAGATAGTGCTGTTCGACCTCTCAATGTATTAGGTTTATC 480
|||...|||

Sbjct 435  AAGTATTGGCATGGGTAGTACTGGATAGTGCTGTTCGACCTCTCAATGTATTAGGTTTATC 494

Query 481  CAACTCGTTGAATGGTGTGGCGGGATATTTCTGGTATTGTTGGCCCGGCCTTACAACAAC 540
|||...|||

Sbjct 495  CAACTCGTTGAATGGTGTGGCGGGATATTTCTGGTATTGTTGGCCCGGCCTTACAACAAC 554

Query 541  CAAACAAGTTTGACCTCAAATCAGGTAGGAATACCCGCTGAACTTAAGCATATCAATAAG 600
|||...|||

```



Sbjct 555 CAAACAAGTTTGACCTCAAATCAGGTAGGAATACCCGCTGAACTTAAGCATATCAA-AAG 613  
 Query 601 C 601  
 |  
 Sbjct 614 C 614

>gb|DQ663477.1| Pichia guilliermondii isolate hn-4 18S ribosomal RNA gene, partial sequence; internal transcribed spacer 1, 5.8S ribosomal RNA gene, and internal transcribed spacer 2, complete sequence; and 28S ribosomal RNA gene, partial sequence  
 Length=607

Score = 1098 bits (594), Expect = 0.0  
 Identities = 597/598 (99%), Gaps = 1/598 (0%)  
 Strand=Plus/Plus

Query 10 GAACCTGCGGAAGGATCATTACAGTATTCTTTTGCCAGCGCTTAACTGCGCGGCGAAAAA 69  
 |||  
 Sbjct 1 GAACCTGCGGAAGGATCATTACAGTATTCTTTTGCCAGCGCTTAACTGCGCGGCGAAAAA 60

Query 70 CCTTACACACAGTGTCTTTTTGATACAGAACTCTTGCTTTGGTTTGGCCTAGAGATAGGT 129  
 |||  
 Sbjct 61 CCTTACACACAGTGTCTTTTTGATACAGAACTCTTGCTTTGGTTTGGCCTAGAGATAGGT 120

Query 130 TGGGCCAGAGGTTTAACAAAACACAATTTAATTATTTTTACAGTTAGTCAAATTTTGAAT 189  
 |||  
 Sbjct 121 TGGGCCAGAGGTTTAACAAAACACAATTTAATTATTTTTACAGTTAGTCAAATTTTGAAT 180

Query 190 TAATCTTCAAAACTTTCAACAACGGATCTCTTGTTCTCGCATCGATGAAGAACGCAGCG 249  
 |||  
 Sbjct 181 TAATCTTCAAAACTTTCAACAACGGATCTCTTGTTCTCGCATCGATGAAGAACGCAGCG 240

Query 250 AAATGCGATAAGTAATATGAATTGCAGATTTTCGTGAATCATCGAATCTTTGAACGCACA 309  
 |||  
 Sbjct 241 AAATGCGATAAGTAATATGAATTGCAGATTTTCGTGAATCATCGAATCTTTGAACGCACA 300

Query 310 TTGCGCCCTCTGGTATTCCAGAGGGCATGCCTGTTTGAGCGTCATTTCTCTCTCAAACCC 369  
 |||  
 Sbjct 301 TTGCGCCCTCTGGTATTCCAGAGGGCATGCCTGTTTGAGCGTCATTTCTCTCTCAAACCC 360

Query 370 CCGGGTTTGGTATTGAGTGATACTCTTAGTCGGACTAGGCGTTTGCTTGAAAAGTATTGG 429  
 |||  
 Sbjct 361 CCGGGTTTGGTATTGAGTGATACTCTTAGTCGGACTAGGCGTTTGCTTGAAAAGTATTGG 420

Query 430 CATGGGTAGTACTAGATAGTGTGTCGACCTCTCAATGTATTAGGTTTATCCAACCTCGTT 489  
 |||  
 Sbjct 421 CATGGGTAGTACTAGATAGTGTGTCGACCTCTCAATGTATTAGGTTTATCCAACCTCGTT 480

Query 490 GAATGGTGTGGCGGGATATTTCTGGTATTGTTGGCCCGGCCTTACAACAACCAAACAAGT 549  
 |||  
 Sbjct 481 GAATGGTGTGGCGGGATATTTCTGGTATTGTTGGCCCGGCCTTACAACAACCAAACAAGT 540

Query 550 TTGACCTCAAATCAGGTAGGAATACCCGCTGAACTTAAGCATATCAATAAGCGGAGGA 607  
 |||  
 Sbjct 541 TTGACCTCAAATCAGGTAGGAATACCCGCTGAACTTAAGCATATCA-TAAGCGGAGGA 597

>gb|DQ534408.1| Debaryomyces hansenii strain JHSa 18S ribosomal RNA gene, partial sequence; internal transcribed spacer 1, 5.8S ribosomal RNA gene, and internal transcribed spacer 2, complete sequence; and 28S ribosomal RNA gene, partial sequence  
 Length=611

Score = 1098 bits (594), Expect = 0.0  
Identities = 597/598 (99%), Gaps = 1/598 (0%)  
Strand=Plus/Plus

```
Query 10 GAACCTGCGGAAGGATCATTACAGTATTCTTTTGCCAGCGCTTAACTGCGCGGCGAAAAA 69
      ||||||||||||||||||||||||||||||||||||||||||||||||||||||||||
Sbjct 14 GAACCTGCGGAAGGATCATTACAGTATTCTTTTGCCAGCGCTTAACTGCGCGGCGAAAAA 73

Query 70 CCTTACACACAGTGTCTTTTTGATACAGAACTCTTGCTTTGGTTTGGCCTAGAGATAGGT 129
      ||||||||||||||||||||||||||||||||||||||||||||||||||||||||||
Sbjct 74 CCTTACACACAGTGTCTTTTTGATACAGAACTCTTGCTTTGGTTTGGCCTAGAGATAGGT 133

Query 130 TGGGCCAGAGGTTTAAACAAAACACAATTTAATTATTTTTACAGTTAGTCAAATTTTGAAT 189
      ||||||||||||||||||||||||||||||||||||||||||||||||||||||||||
Sbjct 134 TGGGCCAGAGGTTTAAACAAAACACAATTTAATTATTTTTACAGTTAGTCAAATTTTGAAT 193

Query 190 TAATCTTCAAACCTTTCAACAACGGATCTCTTGGTTCTCGCATCGATGAAGAACGCAGCG 249
      ||||||||||||||||||||||||||||||||||||||||||||||||||||||||||
Sbjct 194 TAATCTTCAAACCTTTCAACAACGGATCTCTTGGTTCTCGCATCGATGAAGAACGCAGCG 253

Query 250 AAATGCGATAAGTAATATGAATTGCAGATTTTCGTGAATCATCGAATCTTTGAACGCACA 309
      ||||||||||||||||||||||||||||||||||||||||||||||||||||||||||
Sbjct 254 AAATGCGATAAGTAATATGAATTGCAGATTTTCGTGAATCATCGAATCTTTGAACGCACA 313

Query 310 TTGCGCCCTCTGGTATTCCAGAGGGCATGCCTGTTTGAGCGTCATTTCTCTCTCAAACCC 369
      ||||||||||||||||||||||||||||||||||||||||||||||||||||||||||
Sbjct 314 TTGCGCCCTCTGGTATTCCAGAGGGCATGCCTGTTTGAGCGTCATTTCTCTCTCAAACCC 373

Query 370 CCGGGTTTGGTATTGAGTGATACTCTTAGTCGGACTAGGCGTTTGCTTGAAAAGTATTGG 429
      ||||||||||||||||||||||||||||||||||||||||||||||||||||||||||
Sbjct 374 CCGGGTTTGGTATTGAGTGATACTCTTAGTCGGACTAGGCGTTTGCTTGAAAAGTATTGG 433

Query 430 CATGGGTAGTACTAGATAGTGCTGTGCGACCTCTCAATGTATTAGGTTTATCCAACCTCGTT 489
      ||||||||||||||||||||||||||||||||||||||||||||||||||||||||||
Sbjct 434 CATGGGTAGTACTAGATAGTGCTGTGCGACCTCTCAATGTATTAGGTTTATCCAACCTCGTT 493

Query 490 GAATGGTGTGGCGGGATATTTCTGGTATTGTTGGCCCCGGCCTTACAACAACCAAACAAGT 549
      ||||||||||||||||||||||||||||||||||||||||||||||||||||||||||
Sbjct 494 GAATGGTGTGGCGGGATATTTCTGGTATTGTTGGCCCCGGCCTTACAACAACCAAACAAGT 553

Query 550 TTGACCTCAAATCAGGTAGGAATACCCGCTGAACTTAAGCATATCAATAAGCGGAGGA 607
      ||||||||||||||||||||||||||||||||||||||||||||||||||||||
Sbjct 554 TTGACCTCAAATCAGGTAGGAATACCCGCTGAACTTAAGCATATCAATA-GCGGAGGA 610
```

>gb|EF197816.1| *Pichia guilliermondii* strain NA-3 18S ribosomal RNA gene, partial sequence; internal transcribed spacer 1, 5.8S ribosomal RNA gene, and internal transcribed spacer 2, complete sequence; and 28S ribosomal RNA gene, partial sequence  
Length=624

Score = 1096 bits (593), Expect = 0.0  
Identities = 595/596 (99%), Gaps = 0/596 (0%)  
Strand=Plus/Plus

```
Query 1 TCCGTAGGTGAACCTGCGGAAGGATCATTACAGTATTCTTTTGCCAGCGCTTAACTGCGC 60
      ||||||||||||||||||||||||||||||||||||||||||||||||||||||||||
Sbjct 27 TCCGTAGGTGAACCTGCGGAAGGATCATTACAGTATTCTTTTGCCAGCGCTTAACTGCGC 86

Query 61 GGCGAAAAACCTTACACACAGTGTCTTTTTGATACAGAACTCTTGCTTTGGTTTGGCCTA 120
      ||||||||||||||||||||||||||||||||||||||||||||||||||||||||||
Sbjct 87 GGCGAAAAACCTTACACACAGTGTCTTTTTGATACAGAACTCTTGCTTTGGTTTGGCCTA 146

Query 121 GAGATAGGTTGGGCCAGAGGTTTAAACAAAACACAATTTAATTATTTTTACAGTTAGTCAA 180
```

|       |     |                                                                  |     |
|-------|-----|------------------------------------------------------------------|-----|
| Sbjct | 147 | <br>GAGATAGGTTGGGCCAGAGGTTTAAACAAAACACAATTTAATTATTTTACAGTTAGTCAA | 206 |
| Query | 181 | ATTTTGAATTAATCTTCAAACCTTTCAACAACGGATCTCTTGGTTCTCGCATCGATGAAG     | 240 |
| Sbjct | 207 | <br>ATTTTGAATTAATCTTCAAACCTTTCAACAACGGATCTCTTGGTTCTCGCATCGATGAAG | 266 |
| Query | 241 | AACGCAGCGAAATGCGATAAGTAATATGAATTGCAGATTTTCGTGAATCATCGAATCTTT     | 300 |
| Sbjct | 267 | <br>AACGCAGCGAAATGCGATAAGTAATATGAATTGCAGATTTTCGTGAATCATCGAATCTTT | 326 |
| Query | 301 | GAACGCACATTGCGCCCTCTGGTATTCCAGAGGGCATGCCTGTTTGAGCGTCATTTCTCT     | 360 |
| Sbjct | 327 | <br>GAACGCACATTGCGCCCTCTGGTATTCCAGAGGGCATGCCTGTTTGAGCGTCATTTCTCT | 386 |
| Query | 361 | CTCAAACCCCGGGTTTGGTATTGAGTGATACTCTTAGTCGGACTAGGCGTTTGCTTGAA      | 420 |
| Sbjct | 387 | <br>CTCAAACCCCGGGTTTGGTATTGAGTGATACTCTTAGTCGGACTAGGCGTTTGCTTGAA  | 446 |
| Query | 421 | AAGTATTGGCATGGGTAGTACTAGATAGTGCTGTCGACCTCTCAATGTATTAGGTTTATC     | 480 |
| Sbjct | 447 | <br>AAGTATTGGCATGGGTAGTACTGGATAGTGCTGTCGACCTCTCAATGTATTAGGTTTATC | 506 |
| Query | 481 | CAACTCGTTGAATGGTGTGGCGGGATATTTCTGGTATTGTTGGCCCGGCCTTACAACAAC     | 540 |
| Sbjct | 507 | <br>CAACTCGTTGAATGGTGTGGCGGGATATTTCTGGTATTGTTGGCCCGGCCTTACAACAAC | 566 |
| Query | 541 | CAAACAAGTTTGACCTCAAATCAGGTAGGAATACCCGCTGAACTTAAGCATATCAA         | 596 |
| Sbjct | 567 | <br>CAAACAAGTTTGACCTCAAATCAGGTAGGAATACCCGCTGAACTTAAGCATATCAA     | 622 |

>emb|FN428931.1| *Pichia caribbica* ITS1, 5.8S rRNA gene, ITS2 and 26S rRNA gene (partial), strain IMUFRJ 51970  
Length=1167

Score = 1094 bits (592), Expect = 0.0  
Identities = 602/607 (99%), Gaps = 0/607 (0%)  
Strand=Plus/Plus

|       |     |                                                                  |     |
|-------|-----|------------------------------------------------------------------|-----|
| Query | 1   | TCCGTAGGTGAACCTGCGGAAGGATCATTACAGTATTCTTTTGCCAGCGCTTAACTGCGC     | 60  |
| Sbjct | 4   | <br>TCCGTAGGTGAACCTGCGGAAGGATCATTACAGTATTCTTTTGCCAGCGCTTAACTGCGC | 63  |
| Query | 61  | GGCGAAAAACCTTACACACAGTGTCTTTTGTACAGAACTCTTGCTTTGGTTTGGCCTA       | 120 |
| Sbjct | 64  | <br>GGCGAAAAACCTTACACACAGTGTCTTTTGTACAGAACTCTTGCTTTGGTTTGGCCTA   | 123 |
| Query | 121 | GAGATAGGTTGGGCCAGAGGTTTAAACAAAACACAATTTAATTATTTTACAGTTAGTCAA     | 180 |
| Sbjct | 124 | <br>GAGATAGGTTGGGCCAGAGGTTTAAACAAAACACAATTTAATTATTTTATTGATAGTCAA | 183 |
| Query | 181 | ATTTTGAATTAATCTTCAAACCTTTCAACAACGGATCTCTTGGTTCTCGCATCGATGAAG     | 240 |
| Sbjct | 184 | <br>ATTTTGAATTAATCTTCAAACCTTTCAACAACGGATCTCTTGGTTCTCGCATCGATGAAG | 243 |
| Query | 241 | AACGCAGCGAAATGCGATAAGTAATATGAATTGCAGATTTTCGTGAATCATCGAATCTTT     | 300 |
| Sbjct | 244 | <br>AACGCAGCGAAATGCGATAAGTAATATGAATTGCAGATTTTCGTGAATCATCGAATCTTT | 303 |
| Query | 301 | GAACGCACATTGCGCCCTCTGGTATTCCAGAGGGCATGCCTGTTTGAGCGTCATTTCTCT     | 360 |
| Sbjct | 304 | <br>GAACGCACATTGCGCCCTCTGGTATTCCAGAGGGCATGCCTGTTTGAGCGTCATTTCTCT | 363 |

```

Query 361 CTCAAACCCCCGGGTTTGGTATTGAGTGATACTCTTAGTCGGACTAGGCGTTTGCTTGAA 420
          |||
Sbjct 364 CTCAAACCCCCGGGTTTGGTATTGAGTGATACTCTTAGTCGAACTAGGCGTTTGCTTGAA 423

Query 421 AAGTATTGGCATGGGTAGTACTAGATAGTGCTGTTCGACCTCTCAATGTATTAGGTTTATC 480
          |||
Sbjct 424 AAGTATTGGCATGGGTAGTACTGGATAGTGCTGTTCGACCTCTCAATGTATTAGGTTTATC 483

Query 481 CAACTCGTTGAATGGTGTGGCGGGATATTTCTGGTATTGTTGGCCCGCCTTACAACAAC 540
          |||
Sbjct 484 CAACTCGTTGAATGGTGTGGCGGGATATTTCTGGTATTGTTGGCCCGCCTTACAACAAC 543

Query 541 CAAACAAGTTTGACCTCAAATCAGGTAGGAATACCCGCTGAACTTAAGCATATCAATAAG 600
          |||
Sbjct 544 CAAACAAGTTTGACCTCAAATCAGGTAGGAATACCCGCTGAACTTAAGCATATCAATAAG 603

Query 601 CGGAGGA 607
          |||
Sbjct 604 CGGAGGA 610

```

>gb|GU248264.1| *Pichia caribbica* strain XTWJX 18S ribosomal RNA gene, partial sequence; internal transcribed spacer 1, 5.8S ribosomal RNA gene, and internal transcribed spacer 2, complete sequence; and 26S ribosomal RNA gene, partial sequence  
Length=631

Score = 1094 bits (592), Expect = 0.0  
Identities = 602/607 (99%), Gaps = 0/607 (0%)  
Strand=Plus/Plus

```

Query 1 TCCGTAGGTGAACCTGCGGAAGGATCATTACAGTATTCTTTTGCCAGCGCTTAACTGCGC 60
          |||
Sbjct 25 TCCGTAGGTGAACCTGCGGAAGGATCATTACAGTATTCTTTTGCCAGCGCTTAACTGCGC 84

Query 61 GGCGAAAAACCTTACACACAGTGTCTTTTTGATACAGAACTCTTGCTTTGGTTTGGCCTA 120
          |||
Sbjct 85 GGCGAAAAACCTTACACACAGTGTCTTTTTGATACAGAACTCTTGCTTTGGTTTGGCCTA 144

Query 121 GAGATAGGTTGGGCCAGAGGTTTAACAAAACACAATTTAATTATTTTACAGTTAGTCAA 180
          |||
Sbjct 145 GAGATAGGTTGGGCCAGAGGTTTAACAAAACACAATTTAATTATTTTATTGATAGTCAA 204

Query 181 ATTTTGAATTAATCTTCAAACTTTCAACAACGGATCTCTTGGTTCTCGCATCGATGAAG 240
          |||
Sbjct 205 ATTTTGAATTAATCTTCAAACTTTCAACAACGGATCTCTTGGTTCTCGCATCGATGAAG 264

Query 241 AACGCAGCGAAATGCGATAAGTAATATGAATTGCAGATTTTCGTGAATCATCGAATCTTT 300
          |||
Sbjct 265 AACGCAGCGAAATGCGATAAGTAATATGAATTGCAGATTTTCGTGAATCATCGAATCTTT 324

Query 301 GAACGCACATTGCGCCCTCTGGTATTCCAGAGGGCATGCCTGTTTGAGCGTCATTTCTCT 360
          |||
Sbjct 325 GAACGCACATTGCGCCCTCTGGTATTCCAGAGGGCATGCCTGTTTGAGCGTCATTTCTCT 384

Query 361 CTCAAACCCCCGGGTTTGGTATTGAGTGATACTCTTAGTCGGACTAGGCGTTTGCTTGAA 420
          |||
Sbjct 385 CTCAAACCCCCGGGTTTGGTATTGAGTGATACTCTTAGTCGAACTAGGCGTTTGCTTGAA 444

Query 421 AAGTATTGGCATGGGTAGTACTAGATAGTGCTGTTCGACCTCTCAATGTATTAGGTTTATC 480
          |||
Sbjct 445 AAGTATTGGCATGGGTAGTACTGGATAGTGCTGTTCGACCTCTCAATGTATTAGGTTTATC 504

Query 481 CAACTCGTTGAATGGTGTGGCGGGATATTTCTGGTATTGTTGGCCCGCCTTACAACAAC 540

```

```

Sbjct 505 |||||CAACTCGTTGAATGGTGTGGCGGGATATTTCTGGTATTGTTGGCCCGGCCTTACAACAAC 564
Query 541 CAAACAAGTTTGGACCTCAAATCAGGTAGGAATACCCGCTGAACTTAAGCATATCAATAAG 600
Sbjct 565 |||||CAACTCGTTGAATGGTGTGGCGGGATATTTCTGGTATTGTTGGCCCGGCCTTACAATAAG 624
Query 601 CGGAGGA 607
Sbjct 625 |||||CGGAGGA 631

```

>gb|FJ183437.1| *Pichia guilliermondii* strain VAL-05-030 18S ribosomal RNA gene, partial sequence; internal transcribed spacer 1, 5.8S ribosomal RNA gene, and internal transcribed spacer 2, complete sequence; and 28S ribosomal RNA gene, partial sequence  
Length=592

Score = 1094 bits (592), Expect = 0.0  
Identities = 592/592 (100%), Gaps = 0/592 (0%)  
Strand=Plus/Plus

```

Query 1 TCCGTAGGTGAACCTGCGGAAGGATCATTACAGTATTCTTTTGCCAGCGCTTAACTGCGC 60
Sbjct 1 TCCGTAGGTGAACCTGCGGAAGGATCATTACAGTATTCTTTTGCCAGCGCTTAACTGCGC 60
Query 61 GGCGAAAAACCTTACACACAGTGTCTTTTGGATAACAGAACTCTTGCTTTGGTTTGGCCTA 120
Sbjct 61 GGCGAAAAACCTTACACACAGTGTCTTTTGGATAACAGAACTCTTGCTTTGGTTTGGCCTA 120
Query 121 GAGATAGGTTGGGCCAGAGGTTTAAACAAAAACACAATTTAATTATTTTACAGTTAGTCAA 180
Sbjct 121 GAGATAGGTTGGGCCAGAGGTTTAAACAAAAACACAATTTAATTATTTTACAGTTAGTCAA 180
Query 181 ATTTTGAATTAATCTTCAAACCTTTCAACAACGGATCTCTTGGTTCTCGCATCGATGAAG 240
Sbjct 181 ATTTTGAATTAATCTTCAAACCTTTCAACAACGGATCTCTTGGTTCTCGCATCGATGAAG 240
Query 241 AACGCAGCGAAATGCGATAAGTAATATGAATTGCAGATTTTCGTGAATCATCGAATCTTT 300
Sbjct 241 AACGCAGCGAAATGCGATAAGTAATATGAATTGCAGATTTTCGTGAATCATCGAATCTTT 300
Query 301 GAACGCACATTGCGCCCTCTGGTATTCCAGAGGGCATGCCTGTTTGAGCGTCATTTCTCT 360
Sbjct 301 GAACGCACATTGCGCCCTCTGGTATTCCAGAGGGCATGCCTGTTTGAGCGTCATTTCTCT 360
Query 361 CTCAAACCCCCGGGTTTGGTATTGAGTGATACTCTTAGTCGGACTAGGCGTTTGCTTGAA 420
Sbjct 361 CTCAAACCCCCGGGTTTGGTATTGAGTGATACTCTTAGTCGGACTAGGCGTTTGCTTGAA 420
Query 421 AAGTATTGGCATGGGTAGTACTAGATAGTGCTGTGACCTCTCAATGTATTAGGTTTATC 480
Sbjct 421 AAGTATTGGCATGGGTAGTACTAGATAGTGCTGTGACCTCTCAATGTATTAGGTTTATC 480
Query 481 CAACTCGTTGAATGGTGTGGCGGGATATTTCTGGTATTGTTGGCCCGGCCTTACAACAAC 540
Sbjct 481 CAACTCGTTGAATGGTGTGGCGGGATATTTCTGGTATTGTTGGCCCGGCCTTACAACAAC 540
Query 541 CAAACAAGTTTGGACCTCAAATCAGGTAGGAATACCCGCTGAACTTAAGCATA 592
Sbjct 541 CAAACAAGTTTGGACCTCAAATCAGGTAGGAATACCCGCTGAACTTAAGCATA 592

```

>gb|FJ183435.1| *Pichia guilliermondii* strain VAL-05-015 18S ribosomal RNA gene,

partial sequence; internal transcribed spacer 1, 5.8S ribosomal RNA gene, and internal transcribed spacer 2, complete sequence; and 28S ribosomal RNA gene, partial sequence  
Length=592

Score = 1094 bits (592), Expect = 0.0  
Identities = 592/592 (100%), Gaps = 0/592 (0%)  
Strand=Plus/Plus

```
Query 1 TCCGTAGGTGAACCTGCGGAAGGATCATTACAGTATTCTTTTGCCAGCGCTTAACTGCGC 60
      |||
Sbjct 1 TCCGTAGGTGAACCTGCGGAAGGATCATTACAGTATTCTTTTGCCAGCGCTTAACTGCGC 60

Query 61 GGCGAAAAACCTTACACACAGTGTCTTTTGATAACAGAACTCTTGCTTTGGTTTGGCCTA 120
      |||
Sbjct 61 GGCGAAAAACCTTACACACAGTGTCTTTTGATAACAGAACTCTTGCTTTGGTTTGGCCTA 120

Query 121 GAGATAGGTTGGGCCAGAGGTTTAAACAAAACACAATTTAATTATTTTACAGTTAGTCAA 180
      |||
Sbjct 121 GAGATAGGTTGGGCCAGAGGTTTAAACAAAACACAATTTAATTATTTTACAGTTAGTCAA 180

Query 181 ATTTTGAATTAATCTTCAAACCTTTCAACAACGGATCTCTTGGTTCTCGCATCGATGAAG 240
      |||
Sbjct 181 ATTTTGAATTAATCTTCAAACCTTTCAACAACGGATCTCTTGGTTCTCGCATCGATGAAG 240

Query 241 AACGCAGCGAAATGCGATAAGTAATATGAATTGCAGATTTTCGTGAATCATCGAATCTTT 300
      |||
Sbjct 241 AACGCAGCGAAATGCGATAAGTAATATGAATTGCAGATTTTCGTGAATCATCGAATCTTT 300

Query 301 GAACGCACATTGCGCCCTCTGGTATTCCAGAGGGCATGCCTGTTTGAGCGTCATTTCTCT 360
      |||
Sbjct 301 GAACGCACATTGCGCCCTCTGGTATTCCAGAGGGCATGCCTGTTTGAGCGTCATTTCTCT 360

Query 361 CTCAAACCCCCGGGTTTGGTATTGAGTGATACTCTTAGTCGGACTAGGCGTTTGCTTGAA 420
      |||
Sbjct 361 CTCAAACCCCCGGGTTTGGTATTGAGTGATACTCTTAGTCGGACTAGGCGTTTGCTTGAA 420

Query 421 AAGTATTGGCATGGGTAGTACTAGATAGTGCTGTGACCTCTCAATGTATTAGGTTTATC 480
      |||
Sbjct 421 AAGTATTGGCATGGGTAGTACTAGATAGTGCTGTGACCTCTCAATGTATTAGGTTTATC 480

Query 481 CAACTCGTTGAATGGTGTGGCGGGATATTTCTGGTATTGTTGGCCCGGCCTTACAACAAC 540
      |||
Sbjct 481 CAACTCGTTGAATGGTGTGGCGGGATATTTCTGGTATTGTTGGCCCGGCCTTACAACAAC 540

Query 541 CAAACAAGTTTGACCTCAAATCAGGTAGGAATACCCGCTGAACTTAAGCATA 592
      |||
Sbjct 541 CAAACAAGTTTGACCTCAAATCAGGTAGGAATACCCGCTGAACTTAAGCATA 592
```

>gb|EU569029.1| Pichia caribbica isolate CNRMA 200500812 18S ribosomal RNA gene, partial sequence; internal transcribed spacer 1, 5.8S ribosomal RNA gene, and internal transcribed spacer 2, complete sequence; and 28S ribosomal RNA gene, partial sequence  
Length=607

Score = 1094 bits (592), Expect = 0.0  
Identities = 602/607 (99%), Gaps = 0/607 (0%)  
Strand=Plus/Plus

```
Query 1 TCCGTAGGTGAACCTGCGGAAGGATCATTACAGTATTCTTTTGCCAGCGCTTAACTGCGC 60
      |||
Sbjct 1 TCCGTAGGTGAACCTGCGGAAGGATCATTACAGTATTCTTTTGCCAGCGCTTAACTGCGC 60
```

```

Query 61  GCGGAAAAACCTTACACACAGTGTCTTTTTGATACAGAACTCTTGCTTTGGTTTGGCCTA 120
          |||
Sbjct 61  GCGGAAAAACCTTACACACAGTGTCTTTTTGATACAGAACTCTTGCTTTGGTTTGGCCTA 120

Query 121 GAGATAGGTTGGGCCAGAGGTTTAACAAAACACAATTTAATTATTTTTACAGTTAGTCAA 180
          |||
Sbjct 121 GAGATAGGTTGGGCCAGAGGTTTAACAAAACACAATTTAATTATTTTTATTGATAGTCAA 180

Query 181 ATTTTGAATTAATCTTCAAACCTTTCAACAACGGATCTCTTGGTTCTCGCATCGATGAAG 240
          |||
Sbjct 181 ATTTTGAATTAATCTTCAAACCTTTCAACAACGGATCTCTTGGTTCTCGCATCGATGAAG 240

Query 241 AACGCAGCGAAATGCGATAAGTAATATGAATTGCAGATTTTCGTGAATCATCGAATCTTT 300
          |||
Sbjct 241 AACGCAGCGAAATGCGATAAGTAATATGAATTGCAGATTTTCGTGAATCATCGAATCTTT 300

Query 301 GAACGCACATTGCGCCCTCTGGTATTCCAGAGGGCATGCCTGTTTGAGCGTCATTTCTCT 360
          |||
Sbjct 301 GAACGCACATTGCGCCCTCTGGTATTCCAGAGGGCATGCCTGTTTGAGCGTCATTTCTCT 360

Query 361 CTCAAACCCCCGGGTTTGGTATTGAGTGATACTCTTAGTCGGACTAGGCGTTTGCTTGAA 420
          |||
Sbjct 361 CTCAAACCCCCGGGTTTGGTATTGAGTGATACTCTTAGTCGAACTAGGCGTTTGCTTGAA 420

Query 421 AAGTATTGGCATGGGTAGTACTAGATAGTGCTGTGACCTCTCAATGTATTAGGTTTATC 480
          |||
Sbjct 421 AAGTATTGGCATGGGTAGTACTGGATAGTGCTGTGACCTCTCAATGTATTAGGTTTATC 480

Query 481 CAACTCGTTGAATGGTGTGGCGGGATATTTCTGGTATTGTTGGCCCGGCCTTACAACAAC 540
          |||
Sbjct 481 CAACTCGTTGAATGGTGTGGCGGGATATTTCTGGTATTGTTGGCCCGGCCTTACAACAAC 540

Query 541 CAAACAAGTTTGACCTCAAATCAGGTAGGAATACCCGCTGAACTTAAGCATATCAATAAG 600
          |||
Sbjct 541 CAAACAAGTTTGACCTCAAATCAGGTAGGAATACCCGCTGAACTTAAGCATATCAATAAG 600

Query 601  CGGAGGA 607
          |||
Sbjct 601  CGGAGGA 607

```

>gb|EU569027.1| *Pichia caribbica* isolate CNRMA 200500862 18S ribosomal RNA gene, partial sequence; internal transcribed spacer 1, 5.8S ribosomal RNA gene, and internal transcribed spacer 2, complete sequence; and 28S ribosomal RNA gene, partial sequence  
Length=607

Score = 1094 bits (592), Expect = 0.0  
Identities = 602/607 (99%), Gaps = 0/607 (0%)  
Strand=Plus/Plus

```

Query 1  TCCGTAGGTGAACCTGCGGAAGGATCATTACAGTATTCTTTTGCCAGCGCTTAACTGCGC 60
          |||
Sbjct 1  TCCGTAGGTGAACCTGCGGAAGGATCATTACAGTATTCTTTTGCCAGCGCTTAACTGCGC 60

Query 61  GCGGAAAAACCTTACACACAGTGTCTTTTTGATACAGAACTCTTGCTTTGGTTTGGCCTA 120
          |||
Sbjct 61  GCGGAAAAACCTTACACACAGTGTCTTTTTGATACAGAACTCTTGCTTTGGTTTGGCCTA 120

Query 121 GAGATAGGTTGGGCCAGAGGTTTAACAAAACACAATTTAATTATTTTTACAGTTAGTCAA 180
          |||
Sbjct 121 GAGATAGGTTGGGCCAGAGGTTTAACAAAACACAATTTAATTATTTTTATTGATAGTCAA 180

Query 181 ATTTTGAATTAATCTTCAAACCTTTCAACAACGGATCTCTTGGTTCTCGCATCGATGAAG 240

```

```

Sbjct 181  |||...||| 240
ATTTTGAATTAATCTTCAAAACTTTCAACAACGGATCTCTTGGTTCTCGCATCGATGAAG

Query 241  AACGCAGCGAAATGCGATAAGTAATATGAATTGCAGATTTTCGTGAATCATCGAATCTTT 300
|||...|||

Sbjct 241  AACGCAGCGAAATGCGATAAGTAATATGAATTGCAGATTTTCGTGAATCATCGAATCTTT 300
|||...|||

Query 301  GAACGCACATTGCGCCCTCTGGTATTCCAGAGGGCATGCCTGTTTGAGCGTCATTTCTCT 360
|||...|||

Sbjct 301  GAACGCACATTGCGCCCTCTGGTATTCCAGAGGGCATGCCTGTTTGAGCGTCATTTCTCT 360
|||...|||

Query 361  CTCAAACCCCCGGGTTTGGTATTGAGTGATACTCTTAGTCGGACTAGGCGTTTGCTTGAA 420
|||...|||

Sbjct 361  CTCAAACCCCCGGGTTTGGTATTGAGTGATACTCTTAGTCGAACTAGGCGTTTGCTTGAA 420
|||...|||

Query 421  AAGTATTGGCATGGGTAGTACTAGATAGTGCTGTTCGACCTCTCAATGTATTAGGTTTATC 480
|||...|||

Sbjct 421  AAGTATTGGCATGGGTAGTACTGGATAGTGCTGTTCGACCTCTCAATGTATTAGGTTTATC 480
|||...|||

Query 481  CAACTCGTTGAATGGTGTGGCGGGATATTTCTGGTATTGTTGGCCCGGCCTTACAACAAC 540
|||...|||

Sbjct 481  CAACTCGTTGAATGGTGTGGCGGGATATTTCTGGTATTGTTGGCCCGGCCTTACAACAAC 540
|||...|||

Query 541  CAAACAAGTTTGACCTCAAATCAGGTAGGAATACCCGCTGAACTTAAGCATATCAATAAG 600
|||...|||

Sbjct 541  CAAACAAGTTTGACCTCAAATCAGGTAGGAATACCCGCTGAACTTAAGCATATCAATAAG 600
|||...|||

Query 601  CGGAGGA 607
|||...|||

Sbjct 601  CGGAGGA 607

```

>gb|EU569025.1| *Pichia caribbica* isolate CNRMA 200501000 18S ribosomal RNA gene, partial sequence; internal transcribed spacer 1, 5.8S ribosomal RNA gene, and internal transcribed spacer 2, complete sequence; and 28S ribosomal RNA gene, partial sequence  
Length=607

Score = 1094 bits (592), Expect = 0.0  
Identities = 602/607 (99%), Gaps = 0/607 (0%)  
Strand=Plus/Plus

```

Query 1  TCCGTAGGTGAACCTGCGGAAGGATCATTACAGTATTCTTTTGCCAGCGCTTAACTGCGC 60
|||...|||

Sbjct 1  TCCGTAGGTGAACCTGCGGAAGGATCATTACAGTATTCTTTTGCCAGCGCTTAACTGCGC 60
|||...|||

Query 61  GCGGAAAAACCTTACACACAGTGTCTTTTGTACAGAACTCTTGCTTTGGTTTGGCCTA 120
|||...|||

Sbjct 61  GCGGAAAAACCTTACACACAGTGTCTTTTGTACAGAACTCTTGCTTTGGTTTGGCCTA 120
|||...|||

Query 121  GAGATAGGTTGGGCCAGAGGTTTAACAAAACACAATTTAATTATTTTACAGTTAGTCAA 180
|||...|||

Sbjct 121  GAGATAGGTTGGGCCAGAGGTTTAACAAAACACAATTTAATTATTTTATTGATAGTCAA 180
|||...|||

Query 181  ATTTTGAATTAATCTTCAAAACTTTCAACAACGGATCTCTTGGTTCTCGCATCGATGAAG 240
|||...|||

Sbjct 181  ATTTTGAATTAATCTTCAAAACTTTCAACAACGGATCTCTTGGTTCTCGCATCGATGAAG 240
|||...|||

Query 241  AACGCAGCGAAATGCGATAAGTAATATGAATTGCAGATTTTCGTGAATCATCGAATCTTT 300
|||...|||

Sbjct 241  AACGCAGCGAAATGCGATAAGTAATATGAATTGCAGATTTTCGTGAATCATCGAATCTTT 300
|||...|||

Query 301  GAACGCACATTGCGCCCTCTGGTATTCCAGAGGGCATGCCTGTTTGAGCGTCATTTCTCT 360
|||...|||

```



```

Sbjct 301 GAACGCACATTGCGCCCTCTGGTATTCCAGAGGGCATGCCTGTTTGAGCGTCATTTCTCT 360
Query 361 CTCAAACCCCCGGGTTTGGTATTGAGTGATACTCTTAGTCGGACTAGGCGTTTGCTTGAA 420
      |||
Sbjct 361 CTCAAACCCCCGGGTTTGGTATTGAGTGATACTCTTAGTCGAACTAGGCGTTTGCTTGAA 420
Query 421 AAGTATTGGCATGGGTAGTACTAGATAGTGCTGTTCGACCTCTCAATGTATTAGGTTTATC 480
      |||
Sbjct 421 AAGTATTGGCATGGGTAGTACTGGATAGTGCTGTTCGACCTCTCAATGTATTAGGTTTATC 480
Query 481 CAACTCGTTGAATGGTGTGGCGGGATATTTCTGGTATTGTTGGCCCGGCCTTACAACAAC 540
      |||
Sbjct 481 CAACTCGTTGAATGGTGTGGCGGGATATTTCTGGTATTGTTGGCCCGGCCTTACAACAAC 540
Query 541 CAAACAAGTTTGACCTCAAATCAGGTAGGAATACCCGCTGAACTTAAGCATATCAATAAG 600
      |||
Sbjct 541 CAAACAAGTTTGACCTCAAATCAGGTAGGAATACCCGCTGAACTTAAGCATATCAATAAG 600
Query 601 CGGAGGA 607
      |||
Sbjct 601 CGGAGGA 607

```

>gb|EU569023.1| *Pichia caribbica* isolate CNRMA 200501146 18S ribosomal RNA gene, partial sequence; internal transcribed spacer 1, 5.8S ribosomal RNA gene, and internal transcribed spacer 2, complete sequence; and 28S ribosomal RNA gene, partial sequence  
Length=607

Score = 1094 bits (592), Expect = 0.0  
Identities = 602/607 (99%), Gaps = 0/607 (0%)  
Strand=Plus/Plus

```

Query 1 TCCGTAGGTGAACCTGCGGAAGGATCATTACAGTATTCTTTTGCCAGCGCTTAACTGCGC 60
      |||
Sbjct 1 TCCGTAGGTGAACCTGCGGAAGGATCATTACAGTATTCTTTTGCCAGCGCTTAACTGCGC 60
Query 61 GGCGAAAAACCTTACACACAGTGTCTTTTGGTACAGAACTCTTGCTTTGGTTTGGCCTA 120
      |||
Sbjct 61 GGCGAAAAACCTTACACACAGTGTCTTTTGGTACAGAACTCTTGCTTTGGTTTGGCCTA 120
Query 121 GAGATAGGTTGGGCCAGAGGTTTAACAAAACACAATTTAATTATTTTACAGTTAGTCAA 180
      |||
Sbjct 121 GAGATAGGTTGGGCCAGAGGTTTAACAAAACACAATTTAATTATTTTATTGATAGTCAA 180
Query 181 ATTTTGAATTAATCTTCAAACCTTTCAACAACGGATCTCTTGGTTCTCGCATCGATGAAG 240
      |||
Sbjct 181 ATTTTGAATTAATCTTCAAACCTTTCAACAACGGATCTCTTGGTTCTCGCATCGATGAAG 240
Query 241 AACGCAGCGAAATGCGATAAGTAATATGAATTGCAGATTTTCGTGAATCATCGAATCTTT 300
      |||
Sbjct 241 AACGCAGCGAAATGCGATAAGTAATATGAATTGCAGATTTTCGTGAATCATCGAATCTTT 300
Query 301 GAACGCACATTGCGCCCTCTGGTATTCCAGAGGGCATGCCTGTTTGAGCGTCATTTCTCT 360
      |||
Sbjct 301 GAACGCACATTGCGCCCTCTGGTATTCCAGAGGGCATGCCTGTTTGAGCGTCATTTCTCT 360
Query 361 CTCAAACCCCCGGGTTTGGTATTGAGTGATACTCTTAGTCGGACTAGGCGTTTGCTTGAA 420
      |||
Sbjct 361 CTCAAACCCCCGGGTTTGGTATTGAGTGATACTCTTAGTCGAACTAGGCGTTTGCTTGAA 420
Query 421 AAGTATTGGCATGGGTAGTACTAGATAGTGCTGTTCGACCTCTCAATGTATTAGGTTTATC 480
      |||
Sbjct 421 AAGTATTGGCATGGGTAGTACTGGATAGTGCTGTTCGACCTCTCAATGTATTAGGTTTATC 480

```

```

Query 481 CAACTCGTTGAATGGTGTGGCGGGATATTTCTGGTATTGTTGGCCCGGCCTTACAACAAC 540
          |||
Sbjct 481 CAACTCGTTGAATGGTGTGGCGGGATATTTCTGGTATTGTTGGCCCGGCCTTACAACAAC 540

Query 541 CAAACAAGTTTGACCTCAAATCAGGTAGGAATACCCGCTGAACTTAAGCATATCAATAAG 600
          |||
Sbjct 541 CAAACAAGTTTGACCTCAAATCAGGTAGGAATACCCGCTGAACTTAAGCATATCAATAAG 600

Query 601 CGGAGGA 607
          |||
Sbjct 601 CGGAGGA 607

```

>gb|EU569021.1| *Pichia caribbica* isolate CNRMA 200501145 18S ribosomal RNA gene, partial sequence; internal transcribed spacer 1, 5.8S ribosomal RNA gene, and internal transcribed spacer 2, complete sequence; and 28S ribosomal RNA gene, partial sequence  
Length=607

Score = 1094 bits (592), Expect = 0.0  
Identities = 602/607 (99%), Gaps = 0/607 (0%)  
Strand=Plus/Plus

```

Query 1 TCCGTAGGTGAACCTGCGGAAGGATCATTACAGTATTCTTTTGCCAGCGCTTAACTGCGC 60
          |||
Sbjct 1 TCCGTAGGTGAACCTGCGGAAGGATCATTACAGTATTCTTTTGCCAGCGCTTAACTGCGC 60

Query 61 GGCGAAAAACCTTACACACAGTGTCTTTTGTACAGAACTCTTGCTTTGGTTTGGCCTA 120
          |||
Sbjct 61 GGCGAAAAACCTTACACACAGTGTCTTTTGTACAGAACTCTTGCTTTGGTTTGGCCTA 120

Query 121 GAGATAGGTTGGGCCAGAGGTTTAAACAAAACACAATTTAATTATTTTACAGTTAGTCAA 180
          |||
Sbjct 121 GAGATAGGTTGGGCCAGAGGTTTAAACAAAACACAATTTAATTATTTTATTGATAGTCAA 180

Query 181 ATTTTGAATTAATCTTCAAACCTTTCAACAACGGATCTCTTGGTTCTCGCATCGATGAAG 240
          |||
Sbjct 181 ATTTTGAATTAATCTTCAAACCTTTCAACAACGGATCTCTTGGTTCTCGCATCGATGAAG 240

Query 241 AACGCAGCGAAATGCGATAAGTAATATGAATTGCAGATTTTCGTGAATCATCGAATCTTT 300
          |||
Sbjct 241 AACGCAGCGAAATGCGATAAGTAATATGAATTGCAGATTTTCGTGAATCATCGAATCTTT 300

Query 301 GAACGCACATTGCGCCCTCTGGTATTCCAGAGGGCATGCCTGTTTGAGCGTCATTTCTCT 360
          |||
Sbjct 301 GAACGCACATTGCGCCCTCTGGTATTCCAGAGGGCATGCCTGTTTGAGCGTCATTTCTCT 360

Query 361 CTCAAACCCCCGGGTTTGGTATTGAGTGATACTCTTAGTCGGAAGTAGGCGTTTGCTTGAA 420
          |||
Sbjct 361 CTCAAACCCCCGGGTTTGGTATTGAGTGATACTCTTAGTCGGAAGTAGGCGTTTGCTTGAA 420

Query 421 AAGTATTGGCATGGGTAGTACTAGATAGTGCTGTGACCTCTCAATGTATTAGGTTTATC 480
          |||
Sbjct 421 AAGTATTGGCATGGGTAGTACTAGATAGTGCTGTGACCTCTCAATGTATTAGGTTTATC 480

Query 481 CAACTCGTTGAATGGTGTGGCGGGATATTTCTGGTATTGTTGGCCCGGCCTTACAACAAC 540
          |||
Sbjct 481 CAACTCGTTGAATGGTGTGGCGGGATATTTCTGGTATTGTTGGCCCGGCCTTACAACAAC 540

Query 541 CAAACAAGTTTGACCTCAAATCAGGTAGGAATACCCGCTGAACTTAAGCATATCAATAAG 600
          |||
Sbjct 541 CAAACAAGTTTGACCTCAAATCAGGTAGGAATACCCGCTGAACTTAAGCATATCAATAAG 600

```

Query 601 CGGAGGA 607  
|||  
Sbjct 601 CGGAGGA 607

>gb|EU569019.1| Pichia caribbica isolate CNRMA 200501201 18S ribosomal RNA gene, partial sequence; internal transcribed spacer 1, 5.8S ribosomal RNA gene, and internal transcribed spacer 2, complete sequence; and 28S ribosomal RNA gene, partial sequence  
Length=607

Score = 1094 bits (592), Expect = 0.0  
Identities = 602/607 (99%), Gaps = 0/607 (0%)  
Strand=Plus/Plus

Query 1 TCCGTAGGTGAACCTGCGGAAGGATCATTACAGTATTCTTTTGCCAGCGCTTAACTGCGC 60  
|||  
Sbjct 1 TCCGTAGGTGAACCTGCGGAAGGATCATTACAGTATTCTTTTGCCAGCGCTTAACTGCGC 60

Query 61 GGCGAAAAACCTTACACACAGTGTCTTTTGATACAGAACTCTTGCTTTGGTTTGGCCTA 120  
|||  
Sbjct 61 GGCGAAAAACCTTACACACAGTGTCTTTTGATACAGAACTCTTGCTTTGGTTTGGCCTA 120

Query 121 GAGATAGGTTGGGCCAGAGGTTTAAACAAAACACAATTTAATTATTTTACAGTTAGTCAA 180  
|||  
Sbjct 121 GAGATAGGTTGGGCCAGAGGTTTAAACAAAACACAATTTAATTATTTTATTGATAGTCAA 180

Query 181 ATTTTGAATTAATCTTCAAACTTTCAACAACGGATCTCTTGGTTCTCGCATCGATGAAG 240  
|||  
Sbjct 181 ATTTTGAATTAATCTTCAAACTTTCAACAACGGATCTCTTGGTTCTCGCATCGATGAAG 240

Query 241 AACGCAGCGAAATGCGATAAGTAATATGAATTGCAGATTTTCGTGAATCATCGAATCTTT 300  
|||  
Sbjct 241 AACGCAGCGAAATGCGATAAGTAATATGAATTGCAGATTTTCGTGAATCATCGAATCTTT 300

Query 301 GAACGCACATTGCGCCCTCTGGTATTCCAGAGGGCATGCCTGTTTGAGCGTCATTTCTCT 360  
|||  
Sbjct 301 GAACGCACATTGCGCCCTCTGGTATTCCAGAGGGCATGCCTGTTTGAGCGTCATTTCTCT 360

Query 361 CTCAAACCCCCGGGTTTGGTATTGAGTGATACTCTTAGTTCGACTAGGCGTTTGCTTGAA 420  
|||  
Sbjct 361 CTCAAACCCCCGGGTTTGGTATTGAGTGATACTCTTAGTTCGAACTAGGCGTTTGCTTGAA 420

Query 421 AAGTATTGGCATGGGTAGTACTAGATAGTGCTGTGACCTCTCAATGTATTAGGTTTATC 480  
|||  
Sbjct 421 AAGTATTGGCATGGGTAGTACTGGATAGTGCTGTGACCTCTCAATGTATTAGGTTTATC 480

Query 481 CAACTCGTTGAATGGTGTGGCGGGATATTTCTGGTATTGTTGGCCCGGCCTTACAACAAC 540  
|||  
Sbjct 481 CAACTCGTTGAATGGTGTGGCGGGATATTTCTGGTATTGTTGGCCCGGCCTTACAACAAC 540

Query 541 CAAACAAGTTTGACCTCAAATCAGGTAGGAATACCCGCTGAACTTAAGCATATCAATAAG 600  
|||  
Sbjct 541 CAAACAAGTTTGACCTCAAATCAGGTAGGAATACCCGCTGAACTTAAGCATATCAATAAG 600

Query 601 CGGAGGA 607  
|||  
Sbjct 601 CGGAGGA 607

>gb|EU569017.1| Pichia caribbica isolate CNRMA 200500949 18S ribosomal RNA gene, partial sequence; internal transcribed spacer 1, 5.8S ribosomal RNA gene, and internal transcribed spacer 2, complete sequence; and 28S ribosomal RNA gene, partial sequence

Length=607

Score = 1094 bits (592), Expect = 0.0  
Identities = 602/607 (99%), Gaps = 0/607 (0%)  
Strand=Plus/Plus

```
Query 1 TCCGTAGGTGAACCTGCGGAAGGATCATTACAGTATTCTTTTGCCAGCGCTTAACTGCGC 60
      |||
Sbjct 1 TCCGTAGGTGAACCTGCGGAAGGATCATTACAGTATTCTTTTGCCAGCGCTTAACTGCGC 60

Query 61 GGCGAAAAACCTTACACACAGTGTCTTTTGATAACAGAACTCTTGCTTTGGTTTGGCCTA 120
      |||
Sbjct 61 GGCGAAAAACCTTACACACAGTGTCTTTTGATAACAGAACTCTTGCTTTGGTTTGGCCTA 120

Query 121 GAGATAGGTTGGGCCAGAGGTTTAAACAAAACACAATTTAATTATTTTACAGTTAGTCAA 180
      |||
Sbjct 121 GAGATAGGTTGGGCCAGAGGTTTAAACAAAACACAATTTAATTATTTTATTGATAGTCAA 180

Query 181 ATTTTGAATTAATCTTCAAACCTTTCAACAACGGATCTCTTGGTTCTCGCATCGATGAAG 240
      |||
Sbjct 181 ATTTTGAATTAATCTTCAAACCTTTCAACAACGGATCTCTTGGTTCTCGCATCGATGAAG 240

Query 241 AACGCAGCGAAATGCGATAAGTAATATGAATTGCAGATTTTCGTGAATCATCGAATCTTT 300
      |||
Sbjct 241 AACGCAGCGAAATGCGATAAGTAATATGAATTGCAGATTTTCGTGAATCATCGAATCTTT 300

Query 301 GAACGCACATTGCGCCCTCTGGTATTCCAGAGGGCATGCCTGTTTGAGCGTCATTTCTCT 360
      |||
Sbjct 301 GAACGCACATTGCGCCCTCTGGTATTCCAGAGGGCATGCCTGTTTGAGCGTCATTTCTCT 360

Query 361 CTCAAACCCCCGGGTTTGGTATTGAGTGATACTCTTAGTCCGACTAGGCGTTTGCTTGAA 420
      |||
Sbjct 361 CTCAAACCCCCGGGTTTGGTATTGAGTGATACTCTTAGTCCGAACTAGGCGTTTGCTTGAA 420

Query 421 AAGTATTGGCATGGGTAGTACTAGATAGTGCTGTGCGACCTCTCAATGTATTAGGTTTATC 480
      |||
Sbjct 421 AAGTATTGGCATGGGTAGTACTGGATAGTGCTGTGCGACCTCTCAATGTATTAGGTTTATC 480

Query 481 CAACTCGTTGAATGGTGTGGCGGGATATTTCTGGTATTGTTGGCCCGGCCTTACAACAAC 540
      |||
Sbjct 481 CAACTCGTTGAATGGTGTGGCGGGATATTTCTGGTATTGTTGGCCCGGCCTTACAACAAC 540

Query 541 CAAACAAGTTTGACCTCAAATCAGGTAGGAATACCCGCTGAACTTAAGCATATCAATAAG 600
      |||
Sbjct 541 CAAACAAGTTTGACCTCAAATCAGGTAGGAATACCCGCTGAACTTAAGCATATCAATAAG 600

Query 601 CGGAGGA 607
      |||
Sbjct 601 CGGAGGA 607
```

>gb|EU569015.1| *Pichia caribbica* isolate CNRMA 200501317 18S ribosomal RNA gene, partial sequence; internal transcribed spacer 1, 5.8S ribosomal RNA gene, and internal transcribed spacer 2, complete sequence; and 28S ribosomal RNA gene, partial sequence  
Length=607

Score = 1094 bits (592), Expect = 0.0  
Identities = 602/607 (99%), Gaps = 0/607 (0%)  
Strand=Plus/Plus

```
Query 1 TCCGTAGGTGAACCTGCGGAAGGATCATTACAGTATTCTTTTGCCAGCGCTTAACTGCGC 60
      |||
Sbjct 1 TCCGTAGGTGAACCTGCGGAAGGATCATTACAGTATTCTTTTGCCAGCGCTTAACTGCGC 60
```

```

Query 61  GCGGAAAAACCTTACACACAGTGTCTTTTTGATACAGAACTCTTGCTTTGGTTTGGCCTA 120
          |||
Sbjct 61  GCGGAAAAACCTTACACACAGTGTCTTTTTGATACAGAACTCTTGCTTTGGTTTGGCCTA 120

Query 121 GAGATAGGTTGGGCCAGAGGTTTAACAAAACACAATTTAATTATTTTTACAGTTAGTCAA 180
          |||
Sbjct 121 GAGATAGGTTGGGCCAGAGGTTTAACAAAACACAATTTAATTATTTTTATTGATAGTCAA 180

Query 181 ATTTTGAATTAATCTTCAAACCTTTCAACAACGGATCTCTTGGTTCTCGCATCGATGAAG 240
          |||
Sbjct 181 ATTTTGAATTAATCTTCAAACCTTTCAACAACGGATCTCTTGGTTCTCGCATCGATGAAG 240

Query 241 AACGCAGCGAAATGCGATAAGTAATATGAATTGCAGATTTTCGTGAATCATCGAATCTTT 300
          |||
Sbjct 241 AACGCAGCGAAATGCGATAAGTAATATGAATTGCAGATTTTCGTGAATCATCGAATCTTT 300

Query 301 GAACGCACATTGCGCCCTCTGGTATTCCAGAGGGCATGCCTGTTTGAGCGTCATTTCTCT 360
          |||
Sbjct 301 GAACGCACATTGCGCCCTCTGGTATTCCAGAGGGCATGCCTGTTTGAGCGTCATTTCTCT 360

Query 361 CTCAAACCCCCGGGTTTGGTATTGAGTGATACTCTTAGTCGGAAGTAGGCGTTTGCTTGAA 420
          |||
Sbjct 361 CTCAAACCCCCGGGTTTGGTATTGAGTGATACTCTTAGTCGGAAGTAGGCGTTTGCTTGAA 420

Query 421 AAGTATTGGCATGGGTAGTACTAGATAGTGCTGTGACCTCTCAATGTATTAGGTTTATC 480
          |||
Sbjct 421 AAGTATTGGCATGGGTAGTACTGGATAGTGCTGTGACCTCTCAATGTATTAGGTTTATC 480

Query 481 CAACTCGTTGAATGGTGTGGCGGGATATTTCTGGTATTGTTGGCCCGGCCTTACAACAAC 540
          |||
Sbjct 481 CAACTCGTTGAATGGTGTGGCGGGATATTTCTGGTATTGTTGGCCCGGCCTTACAACAAC 540

Query 541 CAAACAAGTTTGACCTCAAATCAGGTAGGAATACCCGCTGAACTTAAGCATATCAATAAG 600
          |||
Sbjct 541 CAAACAAGTTTGACCTCAAATCAGGTAGGAATACCCGCTGAACTTAAGCATATCAATAAG 600

Query 601 CGGAGGA 607
          |||
Sbjct 601 CGGAGGA 607

```

>gb|EU569013.1| *Pichia caribbica* isolate CNRMA 200600033 18S ribosomal RNA gene, partial sequence; internal transcribed spacer 1, 5.8S ribosomal RNA gene, and internal transcribed spacer 2, complete sequence; and 28S ribosomal RNA gene, partial sequence  
Length=607

Score = 1094 bits (592), Expect = 0.0  
Identities = 602/607 (99%), Gaps = 0/607 (0%)  
Strand=Plus/Plus

```

Query 1  TCCGTAGGTGAACCTGCGGAAGGATCATTACAGTATTCTTTTGCCAGCGCTTAACTGCGC 60
          |||
Sbjct 1  TCCGTAGGTGAACCTGCGGAAGGATCATTACAGTATTCTTTTGCCAGCGCTTAACTGCGC 60

Query 61  GCGGAAAAACCTTACACACAGTGTCTTTTTGATACAGAACTCTTGCTTTGGTTTGGCCTA 120
          |||
Sbjct 61  GCGGAAAAACCTTACACACAGTGTCTTTTTGATACAGAACTCTTGCTTTGGTTTGGCCTA 120

Query 121 GAGATAGGTTGGGCCAGAGGTTTAACAAAACACAATTTAATTATTTTTACAGTTAGTCAA 180
          |||
Sbjct 121 GAGATAGGTTGGGCCAGAGGTTTAACAAAACACAATTTAATTATTTTTATTGATAGTCAA 180

```

```

Query 181 ATTTTGAATTAATCTTCAAAACTTTCAACAACGGATCTCTTGGTTCTCGCATCGATGAAG 240
          |||||||||||||||||||||||||||||||||||||||||||||||||||||||||||
Sbjct 181 ATTTTGAATTAATCTTCAAAACTTTCAACAACGGATCTCTTGGTTCTCGCATCGATGAAG 240

Query 241 AACGCAGCGAAATGCGATAAGTAATATGAATTGCAGATTTTCGTGAATCATCGAATCTTT 300
          |||||||||||||||||||||||||||||||||||||||||||||||||||||||||||
Sbjct 241 AACGCAGCGAAATGCGATAAGTAATATGAATTGCAGATTTTCGTGAATCATCGAATCTTT 300

Query 301 GAACGCACATTGCGCCCTCTGGTATTCCAGAGGGCATGCCTGTTTGAGCGTCATTTCTCT 360
          |||||||||||||||||||||||||||||||||||||||||||||||||||||||||||
Sbjct 301 GAACGCACATTGCGCCCTCTGGTATTCCAGAGGGCATGCCTGTTTGAGCGTCATTTCTCT 360

Query 361 CTCAAACCCCCGGGTTTGGTATTGAGTGATACTCTTAGTCGGACTAGGCGTTTGCTTGAA 420
          |||||||||||||||||||||||||||||||||||||||||||||||||||||||||||
Sbjct 361 CTCAAACCCCCGGGTTTGGTATTGAGTGATACTCTTAGTCGAACTAGGCGTTTGCTTGAA 420

Query 421 AAGTATTGGCATGGGTAGTACTAGATAGTGCTGTGCGACCTCTCAATGTATTAGGTTTATC 480
          |||||||||||||||||||||||||||||||||||||||||||||||||||||||||||
Sbjct 421 AAGTATTGGCATGGGTAGTACTGGATAGTGCTGTGCGACCTCTCAATGTATTAGGTTTATC 480

Query 481 CAACTCGTTGAATGGTGTGGCGGGATATTTCTGGTATTGTTGGCCCGGCCTTACAACAAC 540
          |||||||||||||||||||||||||||||||||||||||||||||||||||||||||||
Sbjct 481 CAACTCGTTGAATGGTGTGGCGGGATATTTCTGGTATTGTTGGCCCGGCCTTACAACAAC 540

Query 541 CAAACAAGTTTGACCTCAAATCAGGTAGGAATACCCGCTGAACTTAAGCATATCAATAAG 600
          |||||||||||||||||||||||||||||||||||||||||||||||||||||||||||
Sbjct 541 CAAACAAGTTTGACCTCAAATCAGGTAGGAATACCCGCTGAACTTAAGCATATCAATAAG 600

Query 601 CGGAGGA 607
          |||||||
Sbjct 601 CGGAGGA 607

```

>gb|EU569011.1| *Pichia caribbica* isolate CNRMA 200501316 18S ribosomal RNA gene, partial sequence; internal transcribed spacer 1, 5.8S ribosomal RNA gene, and internal transcribed spacer 2, complete sequence; and 28S ribosomal RNA gene, partial sequence  
Length=607

Score = 1094 bits (592), Expect = 0.0  
Identities = 602/607 (99%), Gaps = 0/607 (0%)  
Strand=Plus/Plus

```

Query 1 TCCGTAGGTGAACCTGCGGAAGGATCATTACAGTATTCTTTTGCCAGCGCTTAACTGCGC 60
          |||||||||||||||||||||||||||||||||||||||||||||||||||||||||||
Sbjct 1 TCCGTAGGTGAACCTGCGGAAGGATCATTACAGTATTCTTTTGCCAGCGCTTAACTGCGC 60

Query 61 GGCGAAAAACCTTACACACAGTGTCTTTTGTACAGAACTCTTGCTTTGGTTTGGCCTA 120
          |||||||||||||||||||||||||||||||||||||||||||||||||||||||||||
Sbjct 61 GGCGAAAAACCTTACACACAGTGTCTTTTGTACAGAACTCTTGCTTTGGTTTGGCCTA 120

Query 121 GAGATAGGTTGGGCCAGAGGTTTAACAAAACACAATTTAATTATTTTACAGTTAGTCAA 180
          |||||||||||||||||||||||||||||||||||||||||||||||||||||||||||
Sbjct 121 GAGATAGGTTGGGCCAGAGGTTTAACAAAACACAATTTAATTATTTTATTGATAGTCAA 180

Query 181 ATTTTGAATTAATCTTCAAAACTTTCAACAACGGATCTCTTGGTTCTCGCATCGATGAAG 240
          |||||||||||||||||||||||||||||||||||||||||||||||||||||||||||
Sbjct 181 ATTTTGAATTAATCTTCAAAACTTTCAACAACGGATCTCTTGGTTCTCGCATCGATGAAG 240

Query 241 AACGCAGCGAAATGCGATAAGTAATATGAATTGCAGATTTTCGTGAATCATCGAATCTTT 300
          |||||||||||||||||||||||||||||||||||||||||||||||||||||||||||
Sbjct 241 AACGCAGCGAAATGCGATAAGTAATATGAATTGCAGATTTTCGTGAATCATCGAATCTTT 300

Query 301 GAACGCACATTGCGCCCTCTGGTATTCCAGAGGGCATGCCTGTTTGAGCGTCATTTCTCT 360

```

```

Sbjct 301  ||||| 360
GAACGCACATTGCGCCCTCTGGTATTCCAGAGGGCATGCCTGTTTGAGCGTCATTTCTCT

Query 361  CTCAAACCCCCGGGTTTGGTATTGAGTGATACTCTTAGTCGGACTAGGCGTTTGCTTGAA 420
|||||
Sbjct 361  CTCAAACCCCCGGGTTTGGTATTGAGTGATACTCTTAGTCGAACTAGGCGTTTGCTTGAA 420

Query 421  AAGTATTGGCATGGGTAGTACTAGATAGTGCTGTGCGACCTCTCAATGTATTAGGTTTATC 480
|||||
Sbjct 421  AAGTATTGGCATGGGTAGTACTGGATAGTGCTGTGCGACCTCTCAATGTATTAGGTTTATC 480

Query 481  CAACTCGTTGAATGGTGTGGCGGGATATTTCTGGTATTGTTGGCCCGGCCTTACAACAAC 540
|||||
Sbjct 481  CAACTCGTTGAATGGTGTGGCGGGATATTTCTGGTATTGTTGGCCCGGCCTTACAACAAC 540

Query 541  CAAACAAGTTTGACCTCAAATCAGGTAGGAATACCCGCTGAACTTAAGCATATCAATAAG 600
|||||
Sbjct 541  CAAACAAGTTTGACCTCAAATCAGGTAGGAATACCCGCTGAACTTAAGCATATCAATAAG 600

Query 601  CGGAGGA 607
|||||
Sbjct 601  CGGAGGA 607

```

>gb|EU569009.1| *Pichia caribbica* isolate CNRMA 200600196 18S ribosomal RNA gene, partial sequence; internal transcribed spacer 1, 5.8S ribosomal RNA gene, and internal transcribed spacer 2, complete sequence; and 28S ribosomal RNA gene, partial sequence  
Length=607

Score = 1094 bits (592), Expect = 0.0  
Identities = 602/607 (99%), Gaps = 0/607 (0%)  
Strand=Plus/Plus

```

Query 1  TCCGTAGGTGAACCTGCGGAAGGATCATTACAGTATTCTTTTGCCAGCGCTTAACTGCGC 60
|||||
Sbjct 1  TCCGTAGGTGAACCTGCGGAAGGATCATTACAGTATTCTTTTGCCAGCGCTTAACTGCGC 60

Query 61  GGCGAAAAACCTTACACACAGTGTCTTTTGGATAACAGAACTCTTGCTTTGGTTTGGCCTA 120
|||||
Sbjct 61  GGCGAAAAACCTTACACACAGTGTCTTTTGGATAACAGAACTCTTGCTTTGGTTTGGCCTA 120

Query 121  GAGATAGGTTGGGCCAGAGGTTTAACAAAACACAATTTAATTATTTTACAGTTAGTCAA 180
|||||
Sbjct 121  GAGATAGGTTGGGCCAGAGGTTTAACAAAACACAATTTAATTATTTTATTTGATAGTCAA 180

Query 181  ATTTTGAATTAATCTTCAAACCTTTCAACAACGGATCTCTTGGTTCTCGCATCGATGAAG 240
|||||
Sbjct 181  ATTTTGAATTAATCTTCAAACCTTTCAACAACGGATCTCTTGGTTCTCGCATCGATGAAG 240

Query 241  AACGCAGCGAAATGCGATAAGTAATATGAATTGCAGATTTTCGTGAATCATCGAATCTTT 300
|||||
Sbjct 241  AACGCAGCGAAATGCGATAAGTAATATGAATTGCAGATTTTCGTGAATCATCGAATCTTT 300

Query 301  GAACGCACATTGCGCCCTCTGGTATTCCAGAGGGCATGCCTGTTTGAGCGTCATTTCTCT 360
|||||
Sbjct 301  GAACGCACATTGCGCCCTCTGGTATTCCAGAGGGCATGCCTGTTTGAGCGTCATTTCTCT 360

Query 361  CTCAAACCCCCGGGTTTGGTATTGAGTGATACTCTTAGTCGGACTAGGCGTTTGCTTGAA 420
|||||
Sbjct 361  CTCAAACCCCCGGGTTTGGTATTGAGTGATACTCTTAGTCGAACTAGGCGTTTGCTTGAA 420

Query 421  AAGTATTGGCATGGGTAGTACTAGATAGTGCTGTGCGACCTCTCAATGTATTAGGTTTATC 480
|||||

```

```

Sbjct 421 AAGTATTGGCATGGGTAGTACTGGATAGTGCTGTCGACCTCTCAATGTATTAGGTTTATC 480
Query 481 CAACTCGTTGAATGGTGTGGCGGGATATTTCTGGTATTGTTGGCCCGGCCTTACAACAAC 540
          |||
Sbjct 481 CAACTCGTTGAATGGTGTGGCGGGATATTTCTGGTATTGTTGGCCCGGCCTTACAACAAC 540
Query 541 CAAACAAGTTTGACCTCAAATCAGGTAGGAATACCCGCTGAACTTAAGCATATCAATAAG 600
          |||
Sbjct 541 CAAACAAGTTTGACCTCAAATCAGGTAGGAATACCCGCTGAACTTAAGCATATCAATAAG 600
Query 601 CGGAGGA 607
          |||
Sbjct 601 CGGAGGA 607

```

>gb|EU569007.1| *Pichia caribbica* isolate CNRMA 200600368 18S ribosomal RNA gene, partial sequence; internal transcribed spacer 1, 5.8S ribosomal RNA gene, and internal transcribed spacer 2, complete sequence; and 28S ribosomal RNA gene, partial sequence  
Length=607

Score = 1094 bits (592), Expect = 0.0  
Identities = 602/607 (99%), Gaps = 0/607 (0%)  
Strand=Plus/Plus

```

Query 1 TCCGTAGGTGAACCTGCGGAAGGATCATTACAGTATTCTTTTGCCAGCGCTTAACTGCGC 60
          |||
Sbjct 1 TCCGTAGGTGAACCTGCGGAAGGATCATTACAGTATTCTTTTGCCAGCGCTTAACTGCGC 60
Query 61 GGCGAAAAACCTTACACACAGTGTCTTTTGGATAACAGAACTCTTGCTTTGGTTTGGCCTA 120
          |||
Sbjct 61 GGCGAAAAACCTTACACACAGTGTCTTTTGGATAACAGAACTCTTGCTTTGGTTTGGCCTA 120
Query 121 GAGATAGGTTGGGCCAGAGGTTTAAACAAAACACAATTTAATTATTTTACAGTTAGTCAA 180
          |||
Sbjct 121 GAGATAGGTTGGGCCAGAGGTTTAAACAAAACACAATTTAATTATTTTATTGATAGTCAA 180
Query 181 ATTTTGAATTAATCTTCAAACCTTTCAACAACGGATCTCTTGGTTCTCGCATCGATGAAG 240
          |||
Sbjct 181 ATTTTGAATTAATCTTCAAACCTTTCAACAACGGATCTCTTGGTTCTCGCATCGATGAAG 240
Query 241 AACGCAGCGAAATGCGATAAGTAATATGAATTGCAGATTTTCGTGAATCATCGAATCTTT 300
          |||
Sbjct 241 AACGCAGCGAAATGCGATAAGTAATATGAATTGCAGATTTTCGTGAATCATCGAATCTTT 300
Query 301 GAACGCACATTGCGCCCTCTGGTATTCCAGAGGGCATGCCTGTTTGAGCGTCATTTCTCT 360
          |||
Sbjct 301 GAACGCACATTGCGCCCTCTGGTATTCCAGAGGGCATGCCTGTTTGAGCGTCATTTCTCT 360
Query 361 CTCAAACCCCCGGGTTTGGTATTGAGTGATACTCTTAGTTCGAACTAGGCGTTTGCTTGAA 420
          |||
Sbjct 361 CTCAAACCCCCGGGTTTGGTATTGAGTGATACTCTTAGTTCGAACTAGGCGTTTGCTTGAA 420
Query 421 AAGTATTGGCATGGGTAGTACTAGATAGTGCTGTCGACCTCTCAATGTATTAGGTTTATC 480
          |||
Sbjct 421 AAGTATTGGCATGGGTAGTACTAGATAGTGCTGTCGACCTCTCAATGTATTAGGTTTATC 480
Query 481 CAACTCGTTGAATGGTGTGGCGGGATATTTCTGGTATTGTTGGCCCGGCCTTACAACAAC 540
          |||
Sbjct 481 CAACTCGTTGAATGGTGTGGCGGGATATTTCTGGTATTGTTGGCCCGGCCTTACAACAAC 540
Query 541 CAAACAAGTTTGACCTCAAATCAGGTAGGAATACCCGCTGAACTTAAGCATATCAATAAG 600
          |||
Sbjct 541 CAAACAAGTTTGACCTCAAATCAGGTAGGAATACCCGCTGAACTTAAGCATATCAATAAG 600

```



Query 601 CGGAGGA 607  
          |||||||  
Sbjct 601 CGGAGGA 607

>gb|EU569005.1| Pichia caribbica isolate CNRMA 200601082 18S ribosomal RNA gene, partial sequence; internal transcribed spacer 1, 5.8S ribosomal RNA gene, and internal transcribed spacer 2, complete sequence; and 28S ribosomal RNA gene, partial sequence  
Length=607

Score = 1094 bits (592), Expect = 0.0  
Identities = 602/607 (99%), Gaps = 0/607 (0%)  
Strand=Plus/Plus

Query 1 TCCGTAGGTGAACCTGCGGAAGGATCATTACAGTATTCTTTTGCCAGCGCTTAACTGCGC 60  
          ||||||||||||||||||||||||||||||||||||||||||||||||||||||||  
Sbjct 1 TCCGTAGGTGAACCTGCGGAAGGATCATTACAGTATTCTTTTGCCAGCGCTTAACTGCGC 60

Query 61 GGCGAAAAACCTTACACACAGTGTCTTTTGATACAGAACTCTTGCTTTGGTTTGGCCTA 120  
          ||||||||||||||||||||||||||||||||||||||||||||||||||||||||  
Sbjct 61 GGCGAAAAACCTTACACACAGTGTCTTTTGATACAGAACTCTTGCTTTGGTTTGGCCTA 120

Query 121 GAGATAGGTTGGGCCAGAGGTTTAAACAAAACACAATTTAATTATTTTACAGTTAGTCAA 180  
          ||||||||||||||||||||||||||||||||||||||||||||||||||||||||  
Sbjct 121 GAGATAGGTTGGGCCAGAGGTTTAAACAAAACACAATTTAATTATTTTATTGATAGTCAA 180

Query 181 ATTTTGAATTAATCTTCAAACTTTCAACAACGGATCTCTTGGTTCTCGCATCGATGAAG 240  
          ||||||||||||||||||||||||||||||||||||||||||||||||||||||||  
Sbjct 181 ATTTTGAATTAATCTTCAAACTTTCAACAACGGATCTCTTGGTTCTCGCATCGATGAAG 240

Query 241 AACGCAGCGAAATGCGATAAGTAATATGAATTGCAGATTTTCGTGAATCATCGAATCTTT 300  
          ||||||||||||||||||||||||||||||||||||||||||||||||||||||||  
Sbjct 241 AACGCAGCGAAATGCGATAAGTAATATGAATTGCAGATTTTCGTGAATCATCGAATCTTT 300

Query 301 GAACGCACATTGCGCCCTCTGGTATTCCAGAGGGCATGCCTGTTTGAGCGTCATTTCTCT 360  
          ||||||||||||||||||||||||||||||||||||||||||||||||||||||||  
Sbjct 301 GAACGCACATTGCGCCCTCTGGTATTCCAGAGGGCATGCCTGTTTGAGCGTCATTTCTCT 360

Query 361 CTCAAACCCCCGGGTTTGGTATTGAGTGATACTCTTAGTTCGGA TAGGCGTTTGCTTGAA 420  
          ||||||||||||||||||||||||||||||||||||||||||||||||||||||||  
Sbjct 361 CTCAAACCCCCGGGTTTGGTATTGAGTGATACTCTTAGTTCGGA TAGGCGTTTGCTTGAA 420

Query 421 AAGTATTGGCATGGGTAGTACTAGATAGTGCTGTGACCTCTCAATGTATTAGGTTTATC 480  
          ||||||||||||||||||||||||||||||||||||||||||||||||||||||||  
Sbjct 421 AAGTATTGGCATGGGTAGTACTAGATAGTGCTGTGACCTCTCAATGTATTAGGTTTATC 480

Query 481 CAACTCGTTGAATGGTGTGGCGGGATATTTCTGGTATTGTTGGCCCGGCCTTACAACAAC 540  
          ||||||||||||||||||||||||||||||||||||||||||||||||||||||||  
Sbjct 481 CAACTCGTTGAATGGTGTGGCGGGATATTTCTGGTATTGTTGGCCCGGCCTTACAACAAC 540

Query 541 CAAACAAGTTTGACCTCAAATCAGGTAGGAATACCCGCTGAACTTAAGCATATCAATAAG 600  
          ||||||||||||||||||||||||||||||||||||||||||||||||||||||||  
Sbjct 541 CAAACAAGTTTGACCTCAAATCAGGTAGGAATACCCGCTGAACTTAAGCATATCAATAAG 600

Query 601 CGGAGGA 607  
          |||||||  
Sbjct 601 CGGAGGA 607

>gb|EU569003.1| Pichia caribbica isolate CNRMA 200700035 18S ribosomal RNA gene, partial sequence; internal transcribed spacer 1, 5.8S ribosomal RNA gene, and internal transcribed spacer 2, complete

sequence; and 28S ribosomal RNA gene, partial sequence  
Length=607

Score = 1094 bits (592), Expect = 0.0  
Identities = 602/607 (99%), Gaps = 0/607 (0%)  
Strand=Plus/Plus

```
Query 1 TCCGTAGGTGAACCTGCGGAAGGATCATTACAGTATTCTTTTGCCAGCGCTTAACTGCGC 60
      |||
Sbjct 1 TCCGTAGGTGAACCTGCGGAAGGATCATTACAGTATTCTTTTGCCAGCGCTTAACTGCGC 60

Query 61 GGCGAAAAACCTTACACACAGTGTCTTTTGATAACAGAACTCTTGCTTTGGTTTGGCCTA 120
      |||
Sbjct 61 GGCGAAAAACCTTACACACAGTGTCTTTTGATAACAGAACTCTTGCTTTGGTTTGGCCTA 120

Query 121 GAGATAGGTTGGGCCAGAGGTTTAAACAAAACACAATTTAATTATTTTACAGTTAGTCAA 180
      |||
Sbjct 121 GAGATAGGTTGGGCCAGAGGTTTAAACAAAACACAATTTAATTATTTTATTGATAGTCAA 180

Query 181 ATTTTGAATTAATCTTCAAACCTTTCAACAACGGATCTCTTGGTTCTCGCATCGATGAAG 240
      |||
Sbjct 181 ATTTTGAATTAATCTTCAAACCTTTCAACAACGGATCTCTTGGTTCTCGCATCGATGAAG 240

Query 241 AACGCAGCGAAATGCGATAAGTAATATGAATTGCAGATTTTCGTGAATCATCGAATCTTT 300
      |||
Sbjct 241 AACGCAGCGAAATGCGATAAGTAATATGAATTGCAGATTTTCGTGAATCATCGAATCTTT 300

Query 301 GAACGCACATTGCGCCCTCTGGTATTCCAGAGGGCATGCCTGTTTGAGCGTCATTTCTCT 360
      |||
Sbjct 301 GAACGCACATTGCGCCCTCTGGTATTCCAGAGGGCATGCCTGTTTGAGCGTCATTTCTCT 360

Query 361 CTCAAACCCCCGGGTTTGGTATTGAGTGATACTCTTAGTTCGGA TAGGCGTTTGCTTGAA 420
      |||
Sbjct 361 CTCAAACCCCCGGGTTTGGTATTGAGTGATACTCTTAGTTCGGA TAGGCGTTTGCTTGAA 420

Query 421 AAGTATTGGCATGGGTAGTACTAGATAGTGCTGTTCGACCTCTCAATGTATTAGGTTTATC 480
      |||
Sbjct 421 AAGTATTGGCATGGGTAGTACTAGATAGTGCTGTTCGACCTCTCAATGTATTAGGTTTATC 480

Query 481 CAACTCGTTGAATGGTGTGGCGGGATATTTCTGGTATTGTTGGCCCGGCCTTACAACAAC 540
      |||
Sbjct 481 CAACTCGTTGAATGGTGTGGCGGGATATTTCTGGTATTGTTGGCCCGGCCTTACAACAAC 540

Query 541 CAAACAAGTTTGACCTCAAATCAGGTAGGAATACCCGCTGAACTTAAGCATATCAATAAG 600
      |||
Sbjct 541 CAAACAAGTTTGACCTCAAATCAGGTAGGAATACCCGCTGAACTTAAGCATATCAATAAG 600

Query 601 CGGAGGA 607
      |||
Sbjct 601 CGGAGGA 607
```

>gb|EU569001.1| *Pichia caribbica* isolate CNRMA 200700593 18S ribosomal RNA gene,  
partial sequence; internal transcribed spacer 1, 5.8S ribosomal  
RNA gene, and internal transcribed spacer 2, complete  
sequence; and 28S ribosomal RNA gene, partial sequence  
Length=607

Score = 1094 bits (592), Expect = 0.0  
Identities = 602/607 (99%), Gaps = 0/607 (0%)  
Strand=Plus/Plus

```
Query 1 TCCGTAGGTGAACCTGCGGAAGGATCATTACAGTATTCTTTTGCCAGCGCTTAACTGCGC 60
      |||
```



```

Query 181 ATTTTGAATTAATCTTCAAACCTTTCAACAACGGATCTCTTGGTTCTCGCATCGATGAAG 240
          |||||||||||||||||||||||||||||||||||||||||||||||||||||||||||
Sbjct 181 ATTTTGAATTAATCTTCAAACCTTTCAACAACGGATCTCTTGGTTCTCGCATCGATGAAG 240

Query 241 AACGCAGCGAAATGCGATAAGTAATATGAATTGCAGATTTTCGTGAATCATCGAATCTTT 300
          |||||||||||||||||||||||||||||||||||||||||||||||||||||||||||
Sbjct 241 AACGCAGCGAAATGCGATAAGTAATATGAATTGCAGATTTTCGTGAATCATCGAATCTTT 300

Query 301 GAACGCACATTGCGCCCTCTGGTATTCCAGAGGGCATGCCTGTTTGAGCGTCATTTCTCT 360
          |||||||||||||||||||||||||||||||||||||||||||||||||||||||||||
Sbjct 301 GAACGCACATTGCGCCCTCTGGTATTCCAGAGGGCATGCCTGTTTGAGCGTCATTTCTCT 360

Query 361 CTCAAACCCCCGGGTTTGGTATTGAGTGATACTCTTAGTCGGACTAGGCGTTTGCTTGAA 420
          |||||||||||||||||||||||||||||||||||||||||||||||||||||||||||
Sbjct 361 CTCAAACCCCCGGGTTTGGTATTGAGTGATACTCTTAGTCGAACTAGGCGTTTGCTTGAA 420

Query 421 AAGTATTGGCATGGGTAGTACTAGATAGTGCTGTCGACCTCTCAATGTATTAGGTTTATC 480
          |||||||||||||||||||||||||||||||||||||||||||||||||||||||||||
Sbjct 421 AAGTATTGGCATGGGTAGTACTGGATAGTGCTGTCGACCTCTCAATGTATTAGGTTTATC 480

Query 481 CAACTCGTTGAATGGTGTGGCGGGATATTTCTGGTATTGTTGGCCCGGCCTTACAACAAC 540
          |||||||||||||||||||||||||||||||||||||||||||||||||||||||||||
Sbjct 481 CAACTCGTTGAATGGTGTGGCGGGATATTTCTGGTATTGTTGGCCCGGCCTTACAACAAC 540

Query 541 CAAACAAGTTTGACCTCAAATCAGGTAGGAATACCCGCTGAACTTAAGCATATCAATAAG 600
          |||||||||||||||||||||||||||||||||||||||||||||||||||||||||||
Sbjct 541 CAAACAAGTTTGACCTCAAATCAGGTAGGAATACCCGCTGAACTTAAGCATATCAATAAG 600

Query 601 CGGAGGA 607
          |||||||
Sbjct 601 CGGAGGA 607

```

>gb|EF190227.1| Pichia guilliermondii strain gaolzhong2 18S ribosomal RNA gene, partial sequence; internal transcribed spacer 1, 5.8S ribosomal RNA gene, and internal transcribed spacer 2, complete sequence; and 28S ribosomal RNA gene, partial sequence  
Length=624

Score = 1094 bits (592), Expect = 0.0  
Identities = 595/596 (99%), Gaps = 1/596 (0%)  
Strand=Plus/Plus

```

Query 1 TCCGTAGGTGAACCTGCGGAAGGATCATTACAGTATTCTTTTGCCAGCGCTTAACTGCGC 60
          |||||||||||||||||||||||||||||||||||||||||||||||||||||||||||
Sbjct 29 TCCGTAGGTGAACCTGCGGAAGGATCATTACAGTATTCTTTTGCCAGCGCTTAACTGCGC 88

Query 61 GCGGAAAAACCTTACACACAGTGTCTTTTGGTATTGTTGGCCCGGCCTTACAACAAC 120
          |||||||||||||||||||||||||||||||||||||||||||||||||||||||||||
Sbjct 89 GCGGAAAAACCTTACACACAGTGTCTTTTGGTATTGTTGGCCCGGCCTTACAACAAC 148

Query 121 GAGATAGGTTGGGCCAGAGGTTTAACAAAACACAATTTAATTATTTTACAGTTAGTCAA 180
          |||||||||||||||||||||||||||||||||||||||||||||||||||||||||||
Sbjct 149 GAGATAGGTTGGGCCAGAGGTTTAACAAAACACAATTTAATTATTTTACAGTTAGTCAA 208

Query 181 ATTTTGAATTAATCTTCAAACCTTTCAACAACGGATCTCTTGGTTCTCGCATCGATGAAG 240
          |||||||||||||||||||||||||||||||||||||||||||||||||||||||||||
Sbjct 209 ATTTTGAATTAATCTTCAAACCTTTCAACAACGGATCTCTTGGTTCTCGCATCGATGAAG 268

Query 241 AACGCAGCGAAATGCGATAAGTAATATGAATTGCAGATTTTCGTGAATCATCGAATCTTT 300
          |||||||||||||||||||||||||||||||||||||||||||||||||||||||||||
Sbjct 269 AACGCAGCGAAATGCGATAAGTAATATGAATTGCAGATTTTCGTGAATCATCGAATCTTT 328

```

```

Query 301 GAACGCACATTGCGCCCTCTGGTATTCCAGAGGGCATGCCTGTTTGAGCGTCATTTCTCT 360
          |||
Sbjct 329 GAACGCACATTGCGCCCTCTGGTATTCCAGAGGGCATGCCTGTTTGAGCGTCATTTCTCT 388

Query 361 CTCAAACCCCCGGGTTTGGTATTGAGTGATACTCTTAGTCGGACTAGGCGTTTGCTTGAA 420
          |||
Sbjct 389 CTCAAACCCCCGGGTTTGGTATTGAGTGATACTCTTAGTCGGACTAGGCGTTTGCTTGAA 448

Query 421 AAGTATTGGCATGGGTAGTACTAGATAGTGCTGTTCGACCTCTCAATGTATTAGGTTTATC 480
          |||
Sbjct 449 AAGTATTGGCATGGGTAGTACTAGATAGTGCTGTTCGACCTCTCAATGTATTAGGTTTATC 508

Query 481 CAACTCGTTGAATGGTGTGGCGGGATATTTCTGGTATTGTTGGCCCGGCCTTACAACAAC 540
          |||
Sbjct 509 CAACTCGTTGAATGGTGTGGCGGGATATTTCTGGTATTGTTGGCCCGGCCTTACAACAAC 568

Query 541 CAAACAAGTTTGACCTCAAATCAGGTAGGAATACCCGCTGAACTTAAGCATATCAA 596
          |||
Sbjct 569 CAAACAAGTTTGACCTCAAATCAGGTAGGAATACCCGCTGAACTTAAGCATA-CAA 623

```

>emb|AM158922.1| *Candida xestobii* partial 18S rRNA gene, ITS1, 5.8S rRNA gene, ITS2 and partial 26S rRNA gene, strain CBS 5975  
Length=895

Score = 1094 bits (592), Expect = 0.0  
Identities = 603/608 (99%), Gaps = 2/608 (0%)  
Strand=Plus/Plus

```

Query 1 TCCGTAGGTGAACCTGCGGAAGGATCATTACAGTATTCTTTTGCCAGCGCTTAACTGCGC 60
          |||
Sbjct 26 TCCGTAGGTGAACCTGCGGAAGGATCATTACAGTATTCTTTTGCCAGCGCTTAACTGCGC 85

Query 61 GGCGAAAAACCTTACACACAGTGTCTTTTGGATACAGAACTCTTGCTTTGGTTTGGCCTA 120
          |||
Sbjct 86 GGCGAAAAACCTTACACACAGTGTCTTTTGGATACAGAACTCTTGCTTTGGTTTGGCCTA 145

Query 121 GAGATAGGTTGGGCCAGAGGTTTAAACAAAACACAATTTAATTATTTTTCAGTTAGTCA 179
          |||
Sbjct 146 GAGATAGGTTGGGCCAGAGGTTTAAACAAAACACAATTTAATTATTTTTCAGTTAGTCA 204

Query 180 AATTTTGAATTAATCTTCAAACCTTCAACAACGGATCTCTTGGTTCTCGCATCGATGAA 239
          |||
Sbjct 205 AATTTTGAATTAATCTTCAAACCTTCAACAACGGATCTCTTGGTTCTCGCATCGATGAA 264

Query 240 GAACGCAGCGAAATGCGATAAGTAATATGAATTGCAGATTTTCGTGAATCATCGAATCTT 299
          |||
Sbjct 265 GAACGCAGCGAAATGCGATAAGTAATATGAATTGCAGATTTTCGTGAATCATCGAATCTT 324

Query 300 TGAACGCACATTGCGCCCTCTGGTATTCCAGAGGGCATGCCTGTTTGAGCGTCATTTCTC 359
          |||
Sbjct 325 TGAACGCACATTGCGCCCTCTGGTATTCCAGAGGGCATGCCTGTTTGAGCGTCATTTCTC 384

Query 360 TCTCAAACCCCCGGGTTTGGTATTGAGTGATACTCTTAGTCGGACTAGGCGTTTGCTTGA 419
          |||
Sbjct 385 TCTCAAACCCCCGGGTTTGGTATTGAGTGATACTCTTAGTCGGACTAGGCGTTTGCTTGA 444

Query 420 AAAGTATTGGCATGGGTAGTACTAGATAGTGCTGTTCGACCTCTCAATGTATTAGGTTTAT 479
          |||
Sbjct 445 AAAGTATTGGCATGGGTAGTACTAGATAGTGCTGTTCGACCTCTCAATGTATTAGGTTTAT 504

Query 480 CCAACTCGTTGAATGGTGTGGCGGGATATTTCTGGTATTGTTGGCCCGGCCTTACAACAA 539
          |||
Sbjct 505 CCAACTCGTTGAACGGTGTGGCGGGATATTTCTGGTATTGTTGGCCCGGCCTTACAACAA 564

```

```

Query 540 CCAAACAAGTTTGACCTCAAATCAGGTAGGAATACCCGCTGAACTTAAGCATATCAATAA 599
          |||
Sbjct 565 CCAAACAAGTTTGACCTCAAATCAGGTAGGAATACCCGCTGAACTTAAGCATATCAATAA 624

Query 600 GCGGAGGA 607
          |||
Sbjct 625 GCGGAGGA 632

```

>gb|DQ249193.1| *Pichia guilliermondii* strain WM 02.91 18S ribosomal RNA gene, partial sequence; internal transcribed spacer 1, 5.8S ribosomal RNA gene, and internal transcribed spacer 2, complete sequence; and 28S ribosomal RNA gene, partial sequence  
Length=657

Score = 1094 bits (592), Expect = 0.0  
Identities = 597/599 (99%), Gaps = 1/599 (0%)  
Strand=Plus/Plus

```

Query 2 CCGTAGGTGAACCTGCGGAAGGATCATTACAGTATTCTTTTGCCAGCGCTTAACTGCGCG 61
          |||
Sbjct 51 CCGTAGGTGAACCTGCGGAAGGATCATTACAGTATTCTTTTGCCAGCGCTTAACTGCGCG 110

Query 62 GCGAAAAACCTTACACACAGTGTCTTTTTGATACAGAACTCTTGCTTTGGTTTGGCCTAG 121
          |||
Sbjct 111 GCGAAAAACCTTACACACAGTGTCTTTTTGATACAGAACTCTTGCTTTGGTTTGGCCTAG 170

Query 122 AGATAGGTTGGGCCAGAGGTTTAACAAAAACACAATTTAATTATTTTACAGTTAGTCAAA 181
          |||
Sbjct 171 AGATAGGTTGGGCCAGAGGTTTAACAAAAACACAATTTAATTATTTTACAGTTAGTCAAA 230

Query 182 TTTTGAATTAATCTTCAAAACTTTCAACAACGGATCTCTTGGTTCTCGCATCGATGAAGA 241
          |||
Sbjct 231 TTTTGAATTAATCTTCAAAACTTTCAACAACGGATCTCTTGGTTCTCGCATCGATGAAGA 290

Query 242 ACGCAGCGAAATGCGATAAGTAATATGAATTGCAGATTTTCGTGAATCATCGAATCTTTG 301
          |||
Sbjct 291 ACGCAGCGAAATGCGATAAGTAATATGAATTGCAGATTTTCGTGAATCATCGAATCTTTG 350

Query 302 AACGCACATTGCGCCCTCTGGTATTCCAGAGGGCATGCCTGTTTGAGCGTCATTTCTCTC 361
          |||
Sbjct 351 AACGCACATTGCGCCCTCTGGTATTCCAGAGGGCATGCCTGTTTGAGCGTCATTTCTCTC 410

Query 362 TCAAACCCCCGGGTTTGGTATTGAGTGATACTCTTAGTCGGACTAGGCGTTTGCTTGAAA 421
          |||
Sbjct 411 TCAAACCCCCGGGTTTGGTATTGAGTGATACTCTTAGTCGGACTAGGCGTTTGCTTGAAA 470

Query 422 AGTATTGGCATGGGTAGTACTAGATAGTGCTGTCGACCTCTCAATGTATTAGGTTTATCC 481
          |||
Sbjct 471 AGTATTGGCATGGGTAGTACTAGATAGTGCTGTCGACCTCTCAATGTATTAGGTTTATCC 530

Query 482 AACTCGTTGAATGGTGTGGCGGGATATTTCTGGTATTGTTGGCCCCGGCCTTACAACAACC 541
          |||
Sbjct 531 AACTCGTTGAATGGTGTGGCGGGATATTTCTGGTATTGTTGGCCCCGGCCTTACAACAACC 590

Query 542 AAACAAGTTTGACCTCAAATCAGGTAGGAATACCCGCTGAACTTAA-GCATATCAATAA 599
          |||
Sbjct 591 AAACAAGTTTGACCTCAAATCAGGTAGGAATACCCGCTGAACATAAAGCATATCAATAA 649

```

>emb|FM199963.1| *Pichia caribbica* 18S rRNA gene (partial), ITS1, 5.8S rRNA gene, ITS2 and 26S rRNA gene (partial), strain H5MandK13  
Length=606

Score = 1092 bits (591), Expect = 0.0  
Identities = 601/606 (99%), Gaps = 0/606 (0%)  
Strand=Plus/Plus

```
Query 1 TCCGTAGGTGAACCTGCGGAAGGATCATTACAGTATTCTTTTGCCAGCGCTTAACTGCGC 60
      |||
Sbjct 1 TCCGTAGGTGAACCTGCGGAAGGATCATTACAGTATTCTTTTGCCAGCGCTTAACTGCGC 60

Query 61 GGCGAAAAACCTTACACACAGTGTCTTTTGATACAGAACTCTTGCTTTGGTTTGGCCTA 120
      |||
Sbjct 61 GGCGAAAAACCTTACACACAGTGTCTTTTGATACAGAACTCTTGCTTTGGTTTGGCCTA 120

Query 121 GAGATAGGTTGGGCCAGAGGTTTAAACAAAACACAATTTAATTATTTTACAGTTAGTCAA 180
      |||
Sbjct 121 GAGATAGGTTGGGCCAGAGGTTTAAACAAAACACAATTTAATTATTTTATTGATAGTCAA 180

Query 181 ATTTTGAATTAATCTTCAAACCTTTCAACAACGGATCTCTTGGTTCTCGCATCGATGAAG 240
      |||
Sbjct 181 ATTTTGAATTAATCTTCAAACCTTTCAACAACGGATCTCTTGGTTCTCGCATCGATGAAG 240

Query 241 AACGCAGCGAAATGCGATAAGTAATATGAATTGCAGATTTTCGTGAATCATCGAATCTTT 300
      |||
Sbjct 241 AACGCAGCGAAATGCGATAAGTAATATGAATTGCAGATTTTCGTGAATCATCGAATCTTT 300

Query 301 GAACGCACATTGCGCCCTCTGGTATTCCAGAGGGCATGCCTGTTTGAGCGTCATTTCTCT 360
      |||
Sbjct 301 GAACGCACATTGCGCCCTCTGGTATTCCAGAGGGCATGCCTGTTTGAGCGTCATTTCTCT 360

Query 361 CTCAAACCCCCGGGTTTGGTATTGAGTGATACTCTTAGTCCGACTAGGCGTTTGCTTGAA 420
      |||
Sbjct 361 CTCAAACCCCCGGGTTTGGTATTGAGTGATACTCTTAGTCCGACTAGGCGTTTGCTTGAA 420

Query 421 AAGTATTGGCATGGGTAGTACTAGATAGTGCTGTGCGACCTCTCAATGTATTAGGTTTATC 480
      |||
Sbjct 421 AAGTATTGGCATGGGTAGTACTAGATAGTGCTGTGCGACCTCTCAATGTATTAGGTTTATC 480

Query 481 CAACTCGTTGAATGGTGTGGCGGGATATTTCTGGTATTGTTGGCCCGGCCTTACAACAAC 540
      |||
Sbjct 481 CAACTCGTTGAATGGTGTGGCGGGATATTTCTGGTATTGTTGGCCCGGCCTTACAACAAC 540

Query 541 CAAACAAGTTTGACCTCAAATCAGGTAGGAATACCCGCTGAACTTAAGCATATCAATAAG 600
      |||
Sbjct 541 CAAACAAGTTTGACCTCAAATCAGGTAGGAATACCCGCTGAACTTAAGCATATCAATAAG 600

Query 601 CGGAGG 606
      |||
Sbjct 601 CGGAGG 606
```

>gb|EU520225.1| Mycena pura isolate NW473 18S ribosomal RNA gene, partial sequence;  
internal transcribed spacer 1, 5.8S ribosomal RNA gene,  
and internal transcribed spacer 2, complete sequence; and  
28S ribosomal RNA gene, partial sequence  
Length=612

Score = 1083 bits (586), Expect = 0.0  
Identities = 601/609 (98%), Gaps = 3/609 (0%)  
Strand=Plus/Plus

```
Query 1 TCCGTA-GGTGAACCTGCGGAAGGATCATTAC-AGTATTCTTTTGCCAGCGCTTAACTGC 58
      |||
Sbjct 3 TCCGTAGGGTG-ACCTGCGGAAGGATCATTRCRCGKATTCTTTTGCCAGCGCTTAACTGC 61
```





Length of database: 31882540517  
Length adjustment: 32  
Effective length of query: 575  
Effective length of database: 31495654181  
Effective search space: 18110001154075  
Effective search space used: 18110001154075  
A: 0  
X1: 14 (26.9 bits)  
X2: 32 (59.1 bits)  
X3: 54 (99.7 bits)  
S1: 14 (27.0 bits)  
S2: 22 (41.7 bits)
