# Supplementary material
Source: PubMed Central journal article supplement (PMC3313500)
Supplement: gmb-35-1-122-suppl1.pdf [file gmb-35-1-122-suppl1.pdf]

Table S1. Comparison between results with the API 20C AUX commercial kit and DNA sequence identification of some species.

| Nº  | Strain     | API 20 CAUX                             |      |      | Sequencing               |
|-----|------------|-----------------------------------------|------|------|--------------------------|
|     |            | Species                                 | %    | T    |                          |
| 1.  | UNESP 4B   | <i>C. famata</i>                        | 62,6 | 0,65 | <i>C. parapsilosis</i>   |
|     |            | <i>C. guilliermondii</i>                | 37,2 | 0,55 |                          |
| 2.  | UNESP 4C   | <i>C. guilliermondii</i>                | 84,3 | 1,0  | <i>C. guilliermondii</i> |
|     |            | <i>C. famata</i>                        | 15,6 | 0,94 |                          |
| 3.  | LGMG 4B    | <i>C. guilliermondii</i>                | 60,3 | 0,83 | <i>C. guilliermondii</i> |
|     |            | <i>C. famata</i>                        | 39,6 | 0,86 |                          |
| 4.  | LGMG 4E    | <i>C. guilliermondii</i>                | 60,3 | 0,83 | <i>C. guilliermondii</i> |
|     |            | <i>C. famata</i>                        | 39,6 | 0,86 |                          |
| 5.  | UNESP 1A   | <i>C. guilliermondii</i>                | 60,3 | 0,83 | <i>C. guilliermondii</i> |
|     |            | <i>C. famata</i>                        | 39,6 | 0,86 |                          |
| 6.  | UNESP 1B   | <i>C. guilliermondii</i>                | 84,3 | 1,0  | <i>C. guilliermondii</i> |
|     |            | <i>C. famata</i>                        | 15,6 | 0,94 |                          |
| 7.  | UNESP 1C   | <i>C. guilliermondii</i>                | 84,3 | 1,0  | <i>C. guilliermondii</i> |
|     |            | <i>C. famata</i>                        | 15,6 | 0,94 |                          |
| 8.  | UNESP 1D   | <i>C. guilliermondii</i>                | 84,3 | 1,0  | <i>C. guilliermondii</i> |
|     |            | <i>C. famata</i>                        | 15,6 | 0,94 |                          |
| 9.  | UNESP 4A   | <i>C. guilliermondii</i>                | 84,3 | 1,0  | <i>C. guilliermondii</i> |
|     |            | <i>C. famata</i>                        | 15,3 | 0,94 |                          |
| 10. | UNESP 6A   | <i>C. guilliermondii</i>                | 60,3 | 0,83 | <i>C. guilliermondii</i> |
|     |            | <i>C. famata</i>                        | 39,6 | 0,86 |                          |
| 11. | UNESP 6B   | <i>C. guilliermondii</i>                | 60,3 | 0,83 | <i>C. guilliermondii</i> |
|     |            | <i>C. famata</i>                        | 39,6 | 0,86 |                          |
| 12. | UNESP 6C   | <i>C. guilliermondii</i>                | 60,3 | 0,83 | <i>C. guilliermondii</i> |
|     |            | <i>C. famata</i>                        | 39,6 | 0,86 |                          |
| 13. | UNESP 7A   | <i>C. guilliermondii</i>                | 60,3 | 0,83 | <i>C. guilliermondii</i> |
|     |            | <i>C. famata</i>                        | 39,6 | 0,86 |                          |
| 14. | USP H585   | <i>C. guilliermondii</i>                | 84,3 | 1,0  | <i>C. guilliermondii</i> |
|     |            | <i>C. famata</i>                        | 15,3 | 0,94 |                          |
| 15. | SK 043     | <i>C. guilliermondii</i>                | 84,3 | 1,0  | <i>C. guilliermondii</i> |
|     |            | <i>C. famata</i>                        | 15,6 | 0,94 |                          |
| 16. | SK 063     | <i>C. guilliermondii</i>                | 60,3 | 0,83 | <i>C. guilliermondii</i> |
|     |            | <i>C. famata</i>                        | 39,6 | 0,86 |                          |
| 17. | 45 Cont A  | <i>C. guilliermondii</i>                | 60,3 | 0,83 | <i>C. guilliermondii</i> |
|     |            | <i>C. famata</i>                        | 39,6 | 0,86 |                          |
| 18. | USP H1020  | <i>C. guilliermondii</i>                | 60,3 | 0,83 | <i>C. guilliermondii</i> |
|     |            | <i>C. famata</i>                        | 39,6 | 0,86 |                          |
| 19. | LGMG3A     | <i>C. krusei/</i><br><i>inconspicua</i> | 98,9 | 0,91 | <i>C. krusei</i>         |
| 20. | LGMG3B     | <i>C. krusei/</i><br><i>inconspicua</i> | 98,9 | 0,91 | <i>C. krusei</i>         |
| 21. | LGMG3D     | <i>C. krusei/</i><br><i>inconspicua</i> | 98,9 | 0,91 | <i>C. krusei</i>         |
| 22. | LGMG 5G    | <i>C. krusei/</i><br><i>inconspicua</i> | 98,9 | 0,91 | <i>C. krusei</i>         |
| 23. | SK 088     | <i>C. krusei</i><br><i>/inconspicua</i> | 96,2 | 1,00 | <i>C. krusei</i>         |
| 24. | 11ANBN A   | <i>C. krusei/</i><br><i>inconspicua</i> | 98,9 | 0,91 | <i>C. krusei</i>         |
| 25. | 11ANBN B   | <i>C. krusei/</i><br><i>inconspicua</i> | 98,9 | 0,91 | <i>C. krusei</i>         |
| 26. | LGMG 8A    | <i>C. pelliculosa</i>                   | 79,1 | 0,69 | <i>C. subpelliculosa</i> |
| 27. | LGMG 8B    | <i>C. pelliculosa</i>                   | 79,1 | 0,69 | <i>C. subpelliculosa</i> |
| 28. | ATCC 62894 | <i>C. guilliermondii</i>                | 60,3 | 0,83 | <i>C. palmioleophila</i> |
|     |            | <i>C. famata</i>                        | 39,6 | 0,86 |                          |

% - Designates the similarity between the unknown and the standard sample used when the test was assembled

T - Confiability index; maximum value is 1.
